# Supplementary material for: Optimising locational access of deprived populations to farmers’ markets at a national scale: one route to improved fruit and vegetable consumption?
Source: PeerJ. 2013 Jul 2;1:e94. doi: 10.7717/peerj.94 (PMC3709110; doi:10.7717/peerj.94)
Supplement: Supplemental Information 1 [file peerj-01-94-s001.xlsx]

## Sheet: Pop_Existing_125kBuffer
MB2006	MBUR_POP20	CAU2006	CAU_DESCR	WARD_COD	WARD_DES	TA_CODE	TA_DESC	RC_COD	RC_DESC	POINT_X	POINT_Y	Cnt_MB2006	MB2006_1	NZDep2006	NZDep_scor	Weight	DepCat
2119200	45	572900	Thorndon-Tinakori Road	4703	Lambton Ward	47	Wellington City	09	Wellington Region	2.65901e+06	5.99091e+06	1	2119200	6	977	16	2
2774604	159	599300	Gleniti	6404	Timaru Ward	64	Timaru District	13	Canterbury Region	2.36634e+06	5.64545e+06	1	2774604	1	868	52	1
1574400	141	551700	Westown	3301	New Plymouth City Ward	33	New Plymouth District	07	Taranaki Region	2.60254e+06	6.23701e+06	1	1574400	5	964	49	2
1573900	120	551700	Westown	3301	New Plymouth City Ward	33	New Plymouth District	07	Taranaki Region	2.60217e+06	6.23702e+06	1	1573900	7	1010	42	2
786801	165	521801	Otahuhu North	706	Tamaki-Maungakiekie Ward	7	Auckland City	02	Auckland Region	2.67463e+06	6.47205e+06	1	786801	10	1145	74	3
786902	135	521801	Otahuhu North	706	Tamaki-Maungakiekie Ward	7	Auckland City	02	Auckland Region	2.67479e+06	6.47196e+06	1	786902	9	1123	61	3
2119100	6	572900	Thorndon-Tinakori Road	4703	Lambton Ward	47	Wellington City	09	Wellington Region	2.6591e+06	5.99085e+06	1	2119100	6	977	2	2
787900	24	521802	Fairburn	706	Tamaki-Maungakiekie Ward	7	Auckland City	02	Auckland Region	2.67497e+06	6.47149e+06	1	787900	10	1152	11	3
786802	189	521801	Otahuhu North	706	Tamaki-Maungakiekie Ward	7	Auckland City	02	Auckland Region	2.67465e+06	6.47191e+06	1	786802	10	1188	85	3
1203203	105	536810	Mt Maunganui North	2301	Mount Maunganui-Papamoa Ward	23	Tauranga City	04	Bay of Plenty Region	2.79154e+06	6.38985e+06	1	1203203	8	1066	47	3
787400	336	521801	Otahuhu North	706	Tamaki-Maungakiekie Ward	7	Auckland City	02	Auckland Region	2.67489e+06	6.47175e+06	1	787400	9	1131	151	3
1574500	120	551700	Westown	3301	New Plymouth City Ward	33	New Plymouth District	07	Taranaki Region	2.60244e+06	6.23683e+06	1	1574500	9	1104	54	3
1574100	87	551700	Westown	3301	New Plymouth City Ward	33	New Plymouth District	07	Taranaki Region	2.60259e+06	6.23722e+06	1	1574100	7	1000	30	2
787300	99	521801	Otahuhu North	706	Tamaki-Maungakiekie Ward	7	Auckland City	02	Auckland Region	2.67471e+06	6.4717e+06	1	787300	10	1152	45	3
786901	189	521801	Otahuhu North	706	Tamaki-Maungakiekie Ward	7	Auckland City	02	Auckland Region	2.67485e+06	6.47206e+06	1	786901	10	1185	85	3
2753800	66	597720	Mt Somers	6301	Methven-Hinds Ward	63	Ashburton District	13	Canterbury Region	2.40052e+06	5.72277e+06	1	2753800	2	912	22	1
2752900	99	597600	Methven	6301	Methven-Hinds Ward	63	Ashburton District	13	Canterbury Region	2.40098e+06	5.72909e+06	1	2752900	4	936	35	2
2752700	33	597600	Methven	6301	Methven-Hinds Ward	63	Ashburton District	13	Canterbury Region	2.40078e+06	5.72947e+06	1	2752700	8	1040	15	3
2752801	69	597600	Methven	6301	Methven-Hinds Ward	63	Ashburton District	13	Canterbury Region	2.4005e+06	5.72921e+06	1	2752801	4	936	24	2
2752600	129	597600	Methven	6301	Methven-Hinds Ward	63	Ashburton District	13	Canterbury Region	2.4006e+06	5.72943e+06	1	2752600	6	993	45	2
1574300	111	551700	Westown	3301	New Plymouth City Ward	33	New Plymouth District	07	Taranaki Region	2.6023e+06	6.23687e+06	1	1574300	7	1025	39	2
787800	117	521802	Fairburn	706	Tamaki-Maungakiekie Ward	7	Auckland City	02	Auckland Region	2.67477e+06	6.47147e+06	1	787800	10	1165	53	3
1203205	87	536810	Mt Maunganui North	2301	Mount Maunganui-Papamoa Ward	23	Tauranga City	04	Bay of Plenty Region	2.79167e+06	6.38995e+06	1	1203205	9	1110	39	3
786600	84	521801	Otahuhu North	706	Tamaki-Maungakiekie Ward	7	Auckland City	02	Auckland Region	2.67477e+06	6.4722e+06	1	786600	10	1145	38	3
2754000	72	597720	Mt Somers	6301	Methven-Hinds Ward	63	Ashburton District	13	Canterbury Region	2.4002e+06	5.71828e+06	1	2754000	2	912	24	1
2230300	198	578901	Solway North	4802	Urban Ward	48	Masterton District	09	Wellington Region	2.73089e+06	6.02422e+06	1	2230300	9	1128	89	3
2623200	126	594600	Sydenham	6006	Spreydon-Heathcote Ward	60	Christchurch City	13	Canterbury Region	2.48152e+06	5.73918e+06	1	2623200	6	988	44	2
789600	213	521802	Fairburn	706	Tamaki-Maungakiekie Ward	7	Auckland City	02	Auckland Region	2.67499e+06	6.47038e+06	1	789600	9	1115	96	3
789500	174	521802	Fairburn	706	Tamaki-Maungakiekie Ward	7	Auckland City	02	Auckland Region	2.67498e+06	6.4706e+06	1	789500	9	1110	78	3
788602	192	521802	Fairburn	706	Tamaki-Maungakiekie Ward	7	Auckland City	02	Auckland Region	2.67503e+06	6.4712e+06	1	788602	8	1068	86	3
1706700	54	557200	St Johns Hill	3702	Urban Ward	37	Wanganui District	08	Manawatu-Wanganui Region	2.68422e+06	6.1409e+06	1	1706700	1	887	18	1
1705700	72	557200	St Johns Hill	3702	Urban Ward	37	Wanganui District	08	Manawatu-Wanganui Region	2.6841e+06	6.14078e+06	1	1705700	1	887	24	1
789300	141	521802	Fairburn	706	Tamaki-Maungakiekie Ward	7	Auckland City	02	Auckland Region	2.67488e+06	6.47093e+06	1	789300	10	1186	63	3
2230400	165	578901	Solway North	4802	Urban Ward	48	Masterton District	09	Wellington Region	2.73086e+06	6.02402e+06	1	2230400	7	1010	58	2
2231400	78	578901	Solway North	4802	Urban Ward	48	Masterton District	09	Wellington Region	2.73162e+06	6.02428e+06	1	2231400	5	955	27	2
1376604	336	544900	Riverdale	2807	Gisborne Ward	28	Gisborne District	05	Gisborne Region	2.94469e+06	6.27252e+06	1	1376604	1	898	111	1
2231001	48	578901	Solway North	4802	Urban Ward	48	Masterton District	09	Wellington Region	2.73138e+06	6.02485e+06	1	2231001	3	933	16	1
789400	273	521802	Fairburn	706	Tamaki-Maungakiekie Ward	7	Auckland City	02	Auckland Region	2.67481e+06	6.47068e+06	1	789400	9	1098	123	3
788601	189	521802	Fairburn	706	Tamaki-Maungakiekie Ward	7	Auckland City	02	Auckland Region	2.67479e+06	6.47117e+06	1	788601	10	1415	85	3
2231100	156	578901	Solway North	4802	Urban Ward	48	Masterton District	09	Wellington Region	2.73168e+06	6.02462e+06	1	2231100	3	918	51	1
2231002	21	578901	Solway North	4802	Urban Ward	48	Masterton District	09	Wellington Region	2.73148e+06	6.0246e+06	1	2231002	3	933	7	1
1485800	153	547700	St Leonards	3005	Hastings Ward	30	Hastings District	06	Hawke's Bay Region	2.83925e+06	6.16817e+06	1	1485800	10	1176	69	3
2623100	69	594600	Sydenham	6006	Spreydon-Heathcote Ward	60	Christchurch City	13	Canterbury Region	2.48163e+06	5.73929e+06	1	2623100	6	988	24	2
789100	234	521802	Fairburn	706	Tamaki-Maungakiekie Ward	7	Auckland City	02	Auckland Region	2.67507e+06	6.47084e+06	1	789100	9	1075	105	3
397500	63	515002	Point Chevalier East	701	Western Bays Ward	7	Auckland City	02	Auckland Region	2.66346e+06	6.48026e+06	1	397500	3	935	21	1
2626400	126	594400	St Martins	6006	Spreydon-Heathcote Ward	60	Christchurch City	13	Canterbury Region	2.48228e+06	5.73846e+06	1	2626400	3	930	42	1
2625100	174	594400	St Martins	6006	Spreydon-Heathcote Ward	60	Christchurch City	13	Canterbury Region	2.48181e+06	5.73876e+06	1	2625100	3	920	57	1
397400	108	515002	Point Chevalier East	701	Western Bays Ward	7	Auckland City	02	Auckland Region	2.66354e+06	6.48019e+06	1	397400	3	935	36	1
2231800	102	578901	Solway North	4802	Urban Ward	48	Masterton District	09	Wellington Region	2.7315e+06	6.02405e+06	1	2231800	3	933	34	1
2625500	93	594400	St Martins	6006	Spreydon-Heathcote Ward	60	Christchurch City	13	Canterbury Region	2.48214e+06	5.73845e+06	1	2625500	3	920	31	1
2624900	180	594400	St Martins	6006	Spreydon-Heathcote Ward	60	Christchurch City	13	Canterbury Region	2.48169e+06	5.739e+06	1	2624900	4	937	63	2
398200	99	515100	Westmere	701	Western Bays Ward	7	Auckland City	02	Auckland Region	2.6642e+06	6.48096e+06	1	398200	4	940	35	2
2626000	156	594400	St Martins	6006	Spreydon-Heathcote Ward	60	Christchurch City	13	Canterbury Region	2.48206e+06	5.73899e+06	1	2626000	3	932	51	1
2625300	102	594400	St Martins	6006	Spreydon-Heathcote Ward	60	Christchurch City	13	Canterbury Region	2.48204e+06	5.73865e+06	1	2625300	3	920	34	1
2625800	168	594400	St Martins	6006	Spreydon-Heathcote Ward	60	Christchurch City	13	Canterbury Region	2.48212e+06	5.73928e+06	1	2625800	5	966	59	2
398000	147	515100	Westmere	701	Western Bays Ward	7	Auckland City	02	Auckland Region	2.66406e+06	6.48095e+06	1	398000	7	1012	51	2
2625200	99	594400	St Martins	6006	Spreydon-Heathcote Ward	60	Christchurch City	13	Canterbury Region	2.4819e+06	5.73859e+06	1	2625200	6	988	35	2
2626200	117	594400	St Martins	6006	Spreydon-Heathcote Ward	60	Christchurch City	13	Canterbury Region	2.48233e+06	5.73887e+06	1	2626200	2	909	39	1
2625700	120	594400	St Martins	6006	Spreydon-Heathcote Ward	60	Christchurch City	13	Canterbury Region	2.48191e+06	5.7392e+06	1	2625700	7	1009	42	2
2625900	210	594400	St Martins	6006	Spreydon-Heathcote Ward	60	Christchurch City	13	Canterbury Region	2.48228e+06	5.73915e+06	1	2625900	3	921	69	1
397200	99	515002	Point Chevalier East	701	Western Bays Ward	7	Auckland City	02	Auckland Region	2.66335e+06	6.48023e+06	1	397200	4	950	35	2
398100	60	515100	Westmere	701	Western Bays Ward	7	Auckland City	02	Auckland Region	2.6641e+06	6.48079e+06	1	398100	5	956	21	2
529000	57	517500	Kingsland	703	Eden-Albert Ward	7	Auckland City	02	Auckland Region	2.66656e+06	6.48017e+06	1	529000	4	950	20	2
396900	90	515002	Point Chevalier East	701	Western Bays Ward	7	Auckland City	02	Auckland Region	2.66329e+06	6.48051e+06	1	396900	4	950	31	2
529100	51	517500	Kingsland	703	Eden-Albert Ward	7	Auckland City	02	Auckland Region	2.6665e+06	6.48017e+06	1	529100	4	950	18	2
2626300	99	594400	St Martins	6006	Spreydon-Heathcote Ward	60	Christchurch City	13	Canterbury Region	2.48223e+06	5.73872e+06	1	2626300	8	1031	45	3
2626100	117	594400	St Martins	6006	Spreydon-Heathcote Ward	60	Christchurch City	13	Canterbury Region	2.48231e+06	5.73897e+06	1	2626100	4	947	41	2
397900	63	515100	Westmere	701	Western Bays Ward	7	Auckland City	02	Auckland Region	2.66388e+06	6.48102e+06	1	397900	7	1012	22	2
2625000	93	594400	St Martins	6006	Spreydon-Heathcote Ward	60	Christchurch City	13	Canterbury Region	2.48183e+06	5.73896e+06	1	2625000	6	988	33	2
398300	51	515100	Westmere	701	Western Bays Ward	7	Auckland City	02	Auckland Region	2.66426e+06	6.48087e+06	1	398300	4	940	18	2
137706	9	506616	Matheson Bay	401	Northern Ward	4	Rodney District	02	Auckland Region	2.67182e+06	6.54311e+06	1	137706	6	985	3	2
2234700	93	578901	Solway North	4802	Urban Ward	48	Masterton District	09	Wellington Region	2.73154e+06	6.02485e+06	1	2234700	3	928	31	1
1578601	114	551502	Spotswood	3301	New Plymouth City Ward	33	New Plymouth District	07	Taranaki Region	2.59979e+06	6.23588e+06	1	1578601	8	1072	51	3
1578502	141	551502	Spotswood	3301	New Plymouth City Ward	33	New Plymouth District	07	Taranaki Region	2.60007e+06	6.23628e+06	1	1578502	6	986	49	2
137707	12	506616	Matheson Bay	401	Northern Ward	4	Rodney District	02	Auckland Region	2.6717e+06	6.54296e+06	1	137707	6	985	4	2
1578400	108	551502	Spotswood	3301	New Plymouth City Ward	33	New Plymouth District	07	Taranaki Region	2.59961e+06	6.23601e+06	1	1578400	8	1058	49	3
1578602	84	551502	Spotswood	3301	New Plymouth City Ward	33	New Plymouth District	07	Taranaki Region	2.60013e+06	6.23606e+06	1	1578602	8	1072	38	3
792900	138	525420	Papakura North	902	Ardmore Ward	9	Papakura District	02	Auckland Region	2.68338e+06	6.45822e+06	1	792900	9	1136	62	3
137703	36	506616	Matheson Bay	401	Northern Ward	4	Rodney District	02	Auckland Region	2.67204e+06	6.54336e+06	1	137703	6	985	13	2
1578501	36	551502	Spotswood	3301	New Plymouth City Ward	33	New Plymouth District	07	Taranaki Region	2.59991e+06	6.23665e+06	1	1578501	6	986	13	2
793000	15	525410	Papakura Central	903	Drury Ward	9	Papakura District	02	Auckland Region	2.68322e+06	6.45794e+06	1	793000	9	1086	7	3
398500	114	515100	Westmere	701	Western Bays Ward	7	Auckland City	02	Auckland Region	2.66449e+06	6.4811e+06	1	398500	5	956	40	2
137100	165	505400	Leigh	401	Northern Ward	4	Rodney District	02	Auckland Region	2.67258e+06	6.54359e+06	1	137100	6	988	58	2
1579200	123	551503	Marfell	3301	New Plymouth City Ward	33	New Plymouth District	07	Taranaki Region	2.60043e+06	6.23621e+06	1	1579200	9	1083	55	3
1579100	60	551502	Spotswood	3301	New Plymouth City Ward	33	New Plymouth District	07	Taranaki Region	2.60028e+06	6.23632e+06	1	1579100	7	1030	21	2
137705	21	506616	Matheson Bay	401	Northern Ward	4	Rodney District	02	Auckland Region	2.67198e+06	6.54319e+06	1	137705	6	985	7	2
137000	108	505400	Leigh	401	Northern Ward	4	Rodney District	02	Auckland Region	2.67236e+06	6.54385e+06	1	137000	7	1013	38	2
402700	108	515410	Grey Lynn West	701	Western Bays Ward	7	Auckland City	02	Auckland Region	2.6654e+06	6.48145e+06	1	402700	4	940	38	2
402500	141	515410	Grey Lynn West	701	Western Bays Ward	7	Auckland City	02	Auckland Region	2.66492e+06	6.48122e+06	1	402500	4	940	49	2
403500	114	515410	Grey Lynn West	701	Western Bays Ward	7	Auckland City	02	Auckland Region	2.66502e+06	6.48116e+06	1	403500	5	956	40	2
2760800	36	598312	Orari	6401	Geraldine Ward	64	Timaru District	13	Canterbury Region	2.37246e+06	5.68403e+06	1	2760800	2	910	12	1
1581000	84	551501	Lynmouth	3301	New Plymouth City Ward	33	New Plymouth District	07	Taranaki Region	2.6008e+06	6.23725e+06	1	1581000	5	969	29	2
1580900	72	551501	Lynmouth	3301	New Plymouth City Ward	33	New Plymouth District	07	Taranaki Region	2.6005e+06	6.23716e+06	1	1580900	5	969	25	2
438304	129	514103	Auckland Central East	704	Hobson Ward	7	Auckland City	02	Auckland Region	2.66857e+06	6.48215e+06	1	438304	9	1080	58	3
2760000	15	598312	Orari	6401	Geraldine Ward	64	Timaru District	13	Canterbury Region	2.37042e+06	5.67275e+06	1	2760000	4	942	5	2
400300	117	515100	Westmere	701	Western Bays Ward	7	Auckland City	02	Auckland Region	2.66339e+06	6.4814e+06	1	400300	1	897	39	1
138601	87	506615	Cape Rodney	401	Northern Ward	4	Rodney District	02	Auckland Region	2.66818e+06	6.54058e+06	1	138601	5	957	30	2
438216	318	514101	Auckland Harbourside	704	Hobson Ward	7	Auckland City	02	Auckland Region	2.66871e+06	6.4821e+06	1	438216	7	1029	111	2
138602	102	506615	Cape Rodney	401	Northern Ward	4	Rodney District	02	Auckland Region	2.66766e+06	6.53968e+06	1	138602	4	953	36	2
1711400	6	557400	Upper Aramoho	3702	Urban Ward	37	Wanganui District	08	Manawatu-Wanganui Region	2.68866e+06	6.14356e+06	1	1711400	4	948	2	2
794600	135	525630	Papakura North East	902	Ardmore Ward	9	Papakura District	02	Auckland Region	2.68357e+06	6.45828e+06	1	794600	6	990	47	2
138201	87	506615	Cape Rodney	401	Northern Ward	4	Rodney District	02	Auckland Region	2.66328e+06	6.54005e+06	1	138201	5	960	30	2
438104	33	514103	Auckland Central East	704	Hobson Ward	7	Auckland City	02	Auckland Region	2.66812e+06	6.48248e+06	1	438104	8	1060	15	3
1581100	42	551501	Lynmouth	3301	New Plymouth City Ward	33	New Plymouth District	07	Taranaki Region	2.60087e+06	6.23736e+06	1	1581100	5	973	15	2
2759600	12	598312	Orari	6401	Geraldine Ward	64	Timaru District	13	Canterbury Region	2.36743e+06	5.67582e+06	1	2759600	3	932	4	1
438212	222	514101	Auckland Harbourside	704	Hobson Ward	7	Auckland City	02	Auckland Region	2.66835e+06	6.48252e+06	1	438212	7	1030	78	2
176204	57	506200	Silverdale North	403	Eastern Ward	4	Rodney District	02	Auckland Region	2.66255e+06	6.51553e+06	1	176204	1	895	19	1
2760300	12	598312	Orari	6401	Geraldine Ward	64	Timaru District	13	Canterbury Region	2.37101e+06	5.67063e+06	1	2760300	4	942	4	2
400400	57	515100	Westmere	701	Western Bays Ward	7	Auckland City	02	Auckland Region	2.66327e+06	6.48137e+06	1	400400	6	982	20	2
1581200	48	551501	Lynmouth	3301	New Plymouth City Ward	33	New Plymouth District	07	Taranaki Region	2.60109e+06	6.23735e+06	1	1581200	5	973	17	2
795000	114	525630	Papakura North East	902	Ardmore Ward	9	Papakura District	02	Auckland Region	2.68387e+06	6.45854e+06	1	795000	6	992	40	2
794800	90	525630	Papakura North East	902	Ardmore Ward	9	Papakura District	02	Auckland Region	2.68364e+06	6.45856e+06	1	794800	6	987	31	2
138102	135	506615	Cape Rodney	401	Northern Ward	4	Rodney District	02	Auckland Region	2.66438e+06	6.53735e+06	1	138102	3	927	45	1
138701	216	506615	Cape Rodney	401	Northern Ward	4	Rodney District	02	Auckland Region	2.66835e+06	6.54045e+06	1	138701	5	954	76	2
138202	48	506615	Cape Rodney	401	Northern Ward	4	Rodney District	02	Auckland Region	2.66572e+06	6.53852e+06	1	138202	5	960	17	2
1581300	93	551501	Lynmouth	3301	New Plymouth City Ward	33	New Plymouth District	07	Taranaki Region	2.60149e+06	6.2375e+06	1	1581300	6	988	33	2
794500	96	525630	Papakura North East	902	Ardmore Ward	9	Papakura District	02	Auckland Region	2.68346e+06	6.45847e+06	1	794500	8	1065	43	3
794900	150	525630	Papakura North East	902	Ardmore Ward	9	Papakura District	02	Auckland Region	2.68371e+06	6.45841e+06	1	794900	5	955	52	2
1581400	81	551501	Lynmouth	3301	New Plymouth City Ward	33	New Plymouth District	07	Taranaki Region	2.60148e+06	6.23737e+06	1	1581400	6	988	28	2
138203	69	506615	Cape Rodney	401	Northern Ward	4	Rodney District	02	Auckland Region	2.66441e+06	6.53766e+06	1	138203	3	927	23	1
1581700	93	551501	Lynmouth	3301	New Plymouth City Ward	33	New Plymouth District	07	Taranaki Region	2.60117e+06	6.23724e+06	1	1581700	5	958	33	2
1582400	135	551501	Lynmouth	3301	New Plymouth City Ward	33	New Plymouth District	07	Taranaki Region	2.60086e+06	6.23709e+06	1	1582400	9	1133	61	3
795300	123	525630	Papakura North East	902	Ardmore Ward	9	Papakura District	02	Auckland Region	2.68399e+06	6.45861e+06	1	795300	4	951	43	2
796600	159	525610	Papakura East	904	Red Hill Ward	9	Papakura District	02	Auckland Region	2.68458e+06	6.45863e+06	1	796600	10	1141	72	3
402400	159	515410	Grey Lynn West	701	Western Bays Ward	7	Auckland City	02	Auckland Region	2.66486e+06	6.48129e+06	1	402400	1	893	52	1
2762800	168	598500	Geraldine	6401	Geraldine Ward	64	Timaru District	13	Canterbury Region	2.36963e+06	5.67856e+06	1	2762800	4	950	59	2
2762700	111	598500	Geraldine	6401	Geraldine Ward	64	Timaru District	13	Canterbury Region	2.36976e+06	5.67889e+06	1	2762700	7	1009	39	2
2448212	42	586305	Kingsbury	5903	Rangiora Ward	59	Waimakariri District	13	Canterbury Region	2.47623e+06	5.76793e+06	1	2448212	2	901	14	1
402800	201	515431	Surrey Crescent	701	Western Bays Ward	7	Auckland City	02	Auckland Region	2.66444e+06	6.48097e+06	1	402800	5	973	70	2
402600	123	515410	Grey Lynn West	701	Western Bays Ward	7	Auckland City	02	Auckland Region	2.66525e+06	6.48141e+06	1	402600	2	917	41	1
403300	162	515431	Surrey Crescent	701	Western Bays Ward	7	Auckland City	02	Auckland Region	2.66453e+06	6.48068e+06	1	403300	4	939	57	2
1582700	162	551502	Spotswood	3301	New Plymouth City Ward	33	New Plymouth District	07	Taranaki Region	2.60005e+06	6.23663e+06	1	1582700	5	971	57	2
1582800	126	551502	Spotswood	3301	New Plymouth City Ward	33	New Plymouth District	07	Taranaki Region	2.6002e+06	6.23678e+06	1	1582800	7	1027	44	2
1582900	117	551501	Lynmouth	3301	New Plymouth City Ward	33	New Plymouth District	07	Taranaki Region	2.60029e+06	6.23683e+06	1	1582900	9	1092	53	3
1581600	90	551501	Lynmouth	3301	New Plymouth City Ward	33	New Plymouth District	07	Taranaki Region	2.60136e+06	6.23714e+06	1	1581600	5	958	31	2
795500	186	525630	Papakura North East	902	Ardmore Ward	9	Papakura District	02	Auckland Region	2.68415e+06	6.45888e+06	1	795500	5	970	65	2
795400	252	525630	Papakura North East	902	Ardmore Ward	9	Papakura District	02	Auckland Region	2.68405e+06	6.4588e+06	1	795400	9	1111	113	3
403400	114	515410	Grey Lynn West	701	Western Bays Ward	7	Auckland City	02	Auckland Region	2.66499e+06	6.48122e+06	1	403400	3	927	38	1
2761800	30	598312	Orari	6401	Geraldine Ward	64	Timaru District	13	Canterbury Region	2.37037e+06	5.68133e+06	1	2761800	1	870	10	1
403600	195	515410	Grey Lynn West	701	Western Bays Ward	7	Auckland City	02	Auckland Region	2.66512e+06	6.48112e+06	1	403600	6	981	68	2
139800	42	505500	Warkworth	401	Northern Ward	4	Rodney District	02	Auckland Region	2.6598e+06	6.53302e+06	1	139800	7	1005	15	2
402900	99	515431	Surrey Crescent	701	Western Bays Ward	7	Auckland City	02	Auckland Region	2.6645e+06	6.4809e+06	1	402900	4	936	35	2
1582100	108	551501	Lynmouth	3301	New Plymouth City Ward	33	New Plymouth District	07	Taranaki Region	2.60108e+06	6.23694e+06	1	1582100	3	921	36	1
1582500	69	551501	Lynmouth	3301	New Plymouth City Ward	33	New Plymouth District	07	Taranaki Region	2.6003e+06	6.23707e+06	1	1582500	8	1072	31	3
796500	141	525610	Papakura East	904	Red Hill Ward	9	Papakura District	02	Auckland Region	2.68462e+06	6.45877e+06	1	796500	9	1104	63	3
796400	156	525610	Papakura East	904	Red Hill Ward	9	Papakura District	02	Auckland Region	2.68481e+06	6.45876e+06	1	796400	10	1217	70	3
403000	114	515431	Surrey Crescent	701	Western Bays Ward	7	Auckland City	02	Auckland Region	2.66464e+06	6.48095e+06	1	403000	2	911	38	1
403200	156	515431	Surrey Crescent	701	Western Bays Ward	7	Auckland City	02	Auckland Region	2.66461e+06	6.48074e+06	1	403200	2	914	51	1
1582600	96	551502	Spotswood	3301	New Plymouth City Ward	33	New Plymouth District	07	Taranaki Region	2.60003e+06	6.23654e+06	1	1582600	8	1072	43	3
1581800	57	551501	Lynmouth	3301	New Plymouth City Ward	33	New Plymouth District	07	Taranaki Region	2.60122e+06	6.237e+06	1	1581800	6	977	20	2
1583202	42	551501	Lynmouth	3301	New Plymouth City Ward	33	New Plymouth District	07	Taranaki Region	2.60072e+06	6.237e+06	1	1583202	10	1196	19	3
1583100	132	551501	Lynmouth	3301	New Plymouth City Ward	33	New Plymouth District	07	Taranaki Region	2.60054e+06	6.23694e+06	1	1583100	5	964	46	2
1583000	90	551501	Lynmouth	3301	New Plymouth City Ward	33	New Plymouth District	07	Taranaki Region	2.6004e+06	6.2369e+06	1	1583000	9	1096	40	3
1582300	42	551501	Lynmouth	3301	New Plymouth City Ward	33	New Plymouth District	07	Taranaki Region	2.60098e+06	6.23692e+06	1	1582300	8	1066	19	3
796700	177	525610	Papakura East	904	Red Hill Ward	9	Papakura District	02	Auckland Region	2.68468e+06	6.45844e+06	1	796700	10	1141	80	3
796800	96	525610	Papakura East	904	Red Hill Ward	9	Papakura District	02	Auckland Region	2.68487e+06	6.45849e+06	1	796800	10	1151	43	3
403100	156	515431	Surrey Crescent	701	Western Bays Ward	7	Auckland City	02	Auckland Region	2.66474e+06	6.48091e+06	1	403100	3	928	51	1
139900	54	505500	Warkworth	401	Northern Ward	4	Rodney District	02	Auckland Region	2.6597e+06	6.53259e+06	1	139900	7	1005	19	2
795900	153	525630	Papakura North East	902	Ardmore Ward	9	Papakura District	02	Auckland Region	2.68455e+06	6.45909e+06	1	795900	8	1059	69	3
795802	144	525630	Papakura North East	902	Ardmore Ward	9	Papakura District	02	Auckland Region	2.68441e+06	6.45896e+06	1	795802	5	964	50	2
796100	93	525630	Papakura North East	902	Ardmore Ward	9	Papakura District	02	Auckland Region	2.68483e+06	6.45909e+06	1	796100	10	1217	42	3
405900	57	515431	Surrey Crescent	701	Western Bays Ward	7	Auckland City	02	Auckland Region	2.66494e+06	6.48042e+06	1	405900	8	1050	26	3
2765000	75	598500	Geraldine	6401	Geraldine Ward	64	Timaru District	13	Canterbury Region	2.36937e+06	5.6765e+06	1	2765000	4	947	26	2
406400	222	515431	Surrey Crescent	701	Western Bays Ward	7	Auckland City	02	Auckland Region	2.66496e+06	6.48024e+06	1	406400	9	1093	100	3
404000	150	515431	Surrey Crescent	701	Western Bays Ward	7	Auckland City	02	Auckland Region	2.66482e+06	6.48082e+06	1	404000	4	951	52	2
1583600	54	551502	Spotswood	3301	New Plymouth City Ward	33	New Plymouth District	07	Taranaki Region	2.59973e+06	6.2367e+06	1	1583600	6	997	19	2
404800	24	515420	Grey Lynn East	701	Western Bays Ward	7	Auckland City	02	Auckland Region	2.66549e+06	6.48022e+06	1	404800	5	969	8	2
405100	99	515431	Surrey Crescent	701	Western Bays Ward	7	Auckland City	02	Auckland Region	2.66474e+06	6.48054e+06	1	405100	8	1040	45	3
404900	69	515431	Surrey Crescent	701	Western Bays Ward	7	Auckland City	02	Auckland Region	2.66418e+06	6.48069e+06	1	404900	5	972	24	2
1583800	24	551502	Spotswood	3301	New Plymouth City Ward	33	New Plymouth District	07	Taranaki Region	2.59938e+06	6.23663e+06	1	1583800	6	997	8	2
1583400	123	551502	Spotswood	3301	New Plymouth City Ward	33	New Plymouth District	07	Taranaki Region	2.60008e+06	6.23705e+06	1	1583400	6	987	43	2
797600	81	525620	Massey Park	902	Ardmore Ward	9	Papakura District	02	Auckland Region	2.68368e+06	6.45793e+06	1	797600	7	1020	28	2
797400	219	525610	Papakura East	904	Red Hill Ward	9	Papakura District	02	Auckland Region	2.68443e+06	6.45862e+06	1	797400	10	1204	99	3
2763500	114	598500	Geraldine	6401	Geraldine Ward	64	Timaru District	13	Canterbury Region	2.36922e+06	5.67853e+06	1	2763500	3	929	38	1
2763000	111	598500	Geraldine	6401	Geraldine Ward	64	Timaru District	13	Canterbury Region	2.36957e+06	5.67878e+06	1	2763000	6	981	39	2
2763600	81	598500	Geraldine	6401	Geraldine Ward	64	Timaru District	13	Canterbury Region	2.36905e+06	5.67813e+06	1	2763600	7	1022	28	2
1584200	108	551502	Spotswood	3301	New Plymouth City Ward	33	New Plymouth District	07	Taranaki Region	2.5995e+06	6.23582e+06	1	1584200	3	935	36	1
404600	108	515410	Grey Lynn West	701	Western Bays Ward	7	Auckland City	02	Auckland Region	2.66545e+06	6.4806e+06	1	404600	7	1022	38	2
2763800	36	598500	Geraldine	6401	Geraldine Ward	64	Timaru District	13	Canterbury Region	2.36925e+06	5.67807e+06	1	2763800	7	1022	13	2
2763700	33	598500	Geraldine	6401	Geraldine Ward	64	Timaru District	13	Canterbury Region	2.36892e+06	5.67798e+06	1	2763700	7	1022	12	2
2764000	42	598500	Geraldine	6401	Geraldine Ward	64	Timaru District	13	Canterbury Region	2.36946e+06	5.6779e+06	1	2764000	5	961	15	2
797200	285	525620	Massey Park	902	Ardmore Ward	9	Papakura District	02	Auckland Region	2.68418e+06	6.4583e+06	1	797200	9	1097	128	3
797500	168	525610	Papakura East	904	Red Hill Ward	9	Papakura District	02	Auckland Region	2.68457e+06	6.45832e+06	1	797500	10	1155	76	3
403800	84	515410	Grey Lynn West	701	Western Bays Ward	7	Auckland City	02	Auckland Region	2.66511e+06	6.48097e+06	1	403800	4	936	29	2
2764400	33	598500	Geraldine	6401	Geraldine Ward	64	Timaru District	13	Canterbury Region	2.3687e+06	5.67729e+06	1	2764400	8	1068	15	3
1583500	45	551502	Spotswood	3301	New Plymouth City Ward	33	New Plymouth District	07	Taranaki Region	2.59987e+06	6.23684e+06	1	1583500	6	987	16	2
1584000	102	551502	Spotswood	3301	New Plymouth City Ward	33	New Plymouth District	07	Taranaki Region	2.59928e+06	6.23663e+06	1	1584000	6	996	36	2
797000	129	525620	Massey Park	902	Ardmore Ward	9	Papakura District	02	Auckland Region	2.68384e+06	6.45822e+06	1	797000	8	1051	58	3
404500	90	515410	Grey Lynn West	701	Western Bays Ward	7	Auckland City	02	Auckland Region	2.66536e+06	6.48052e+06	1	404500	5	969	31	2
1583700	39	551502	Spotswood	3301	New Plymouth City Ward	33	New Plymouth District	07	Taranaki Region	2.59959e+06	6.23663e+06	1	1583700	6	997	14	2
403700	81	515410	Grey Lynn West	701	Western Bays Ward	7	Auckland City	02	Auckland Region	2.66521e+06	6.48098e+06	1	403700	5	956	28	2
403900	123	515410	Grey Lynn West	701	Western Bays Ward	7	Auckland City	02	Auckland Region	2.66498e+06	6.48096e+06	1	403900	4	936	43	2
404200	114	515410	Grey Lynn West	701	Western Bays Ward	7	Auckland City	02	Auckland Region	2.66513e+06	6.4808e+06	1	404200	5	969	40	2
1583900	180	551502	Spotswood	3301	New Plymouth City Ward	33	New Plymouth District	07	Taranaki Region	2.59941e+06	6.23651e+06	1	1583900	4	953	63	2
1583300	30	551501	Lynmouth	3301	New Plymouth City Ward	33	New Plymouth District	07	Taranaki Region	2.60043e+06	6.23652e+06	1	1583300	9	1096	14	3
797300	228	525620	Massey Park	902	Ardmore Ward	9	Papakura District	02	Auckland Region	2.68434e+06	6.45843e+06	1	797300	9	1084	103	3
404100	63	515410	Grey Lynn West	701	Western Bays Ward	7	Auckland City	02	Auckland Region	2.66499e+06	6.48081e+06	1	404100	5	969	22	2
404400	90	515410	Grey Lynn West	701	Western Bays Ward	7	Auckland City	02	Auckland Region	2.66526e+06	6.48067e+06	1	404400	5	966	31	2
1584103	198	551502	Spotswood	3301	New Plymouth City Ward	33	New Plymouth District	07	Taranaki Region	2.59932e+06	6.23624e+06	1	1584103	6	974	69	2
404700	45	515420	Grey Lynn East	701	Western Bays Ward	7	Auckland City	02	Auckland Region	2.66539e+06	6.48031e+06	1	404700	6	979	16	2
797100	144	525620	Massey Park	902	Ardmore Ward	9	Papakura District	02	Auckland Region	2.68408e+06	6.45844e+06	1	797100	9	1075	65	3
405000	84	515431	Surrey Crescent	701	Western Bays Ward	7	Auckland City	02	Auckland Region	2.66442e+06	6.48061e+06	1	405000	5	972	29	2
2894800	27	602800	Harbourside	7103	Cargill Ward	71	Dunedin City	14	Otago Region	2.31657e+06	5.47819e+06	1	2894800	9	1096	12	3
404300	87	515410	Grey Lynn West	701	Western Bays Ward	7	Auckland City	02	Auckland Region	2.66522e+06	6.48082e+06	1	404300	5	966	30	2
2764500	69	598500	Geraldine	6401	Geraldine Ward	64	Timaru District	13	Canterbury Region	2.3692e+06	5.67753e+06	1	2764500	7	1008	24	2
2764200	78	598500	Geraldine	6401	Geraldine Ward	64	Timaru District	13	Canterbury Region	2.36898e+06	5.67778e+06	1	2764200	8	1068	35	3
2764300	36	598500	Geraldine	6401	Geraldine Ward	64	Timaru District	13	Canterbury Region	2.36907e+06	5.67772e+06	1	2764300	8	1068	16	3
2764100	153	598500	Geraldine	6401	Geraldine Ward	64	Timaru District	13	Canterbury Region	2.36876e+06	5.67767e+06	1	2764100	3	934	50	1
2763900	45	598500	Geraldine	6401	Geraldine Ward	64	Timaru District	13	Canterbury Region	2.36927e+06	5.67795e+06	1	2763900	5	961	16	2
1203300	9	536821	Omanu	2301	Mount Maunganui-Papamoa Ward	23	Tauranga City	04	Bay of Plenty Region	2.79181e+06	6.3893e+06	1	1203300	9	1110	4	3
799000	315	525610	Papakura East	904	Red Hill Ward	9	Papakura District	02	Auckland Region	2.68508e+06	6.45802e+06	1	799000	10	1250	142	3
799102	105	525610	Papakura East	904	Red Hill Ward	9	Papakura District	02	Auckland Region	2.68531e+06	6.4582e+06	1	799102	10	1342	47	3
798700	90	525610	Papakura East	904	Red Hill Ward	9	Papakura District	02	Auckland Region	2.68496e+06	6.45814e+06	1	798700	10	1231	40	3
799200	96	525610	Papakura East	904	Red Hill Ward	9	Papakura District	02	Auckland Region	2.68486e+06	6.45888e+06	1	799200	9	1131	43	3
799400	198	525610	Papakura East	904	Red Hill Ward	9	Papakura District	02	Auckland Region	2.68512e+06	6.45893e+06	1	799400	10	1153	89	3
799300	153	525610	Papakura East	904	Red Hill Ward	9	Papakura District	02	Auckland Region	2.68495e+06	6.45883e+06	1	799300	9	1103	69	3
406100	129	515431	Surrey Crescent	701	Western Bays Ward	7	Auckland City	02	Auckland Region	2.66475e+06	6.48018e+06	1	406100	10	1540	58	3
406000	153	515431	Surrey Crescent	701	Western Bays Ward	7	Auckland City	02	Auckland Region	2.66485e+06	6.48029e+06	1	406000	10	1246	69	3
799112	111	525610	Papakura East	904	Red Hill Ward	9	Papakura District	02	Auckland Region	2.68535e+06	6.45793e+06	1	799112	3	934	37	1
799113	72	525610	Papakura East	904	Red Hill Ward	9	Papakura District	02	Auckland Region	2.68558e+06	6.45791e+06	1	799113	6	998	25	2
406700	66	515431	Surrey Crescent	701	Western Bays Ward	7	Auckland City	02	Auckland Region	2.66502e+06	6.48011e+06	1	406700	5	966	23	2
406202	72	515432	St Lukes North	703	Eden-Albert Ward	7	Auckland City	02	Auckland Region	2.66471e+06	6.47994e+06	1	406202	8	1040	32	3
1586100	30	551400	Moturoa	3301	New Plymouth City Ward	33	New Plymouth District	07	Taranaki Region	2.59969e+06	6.23733e+06	1	1586100	8	1032	14	3
1586400	132	551400	Moturoa	3301	New Plymouth City Ward	33	New Plymouth District	07	Taranaki Region	2.60019e+06	6.23736e+06	1	1586400	7	1008	46	2
406300	9	515431	Surrey Crescent	701	Western Bays Ward	7	Auckland City	02	Auckland Region	2.66466e+06	6.48012e+06	1	406300	8	1040	4	3
799114	99	525610	Papakura East	904	Red Hill Ward	9	Papakura District	02	Auckland Region	2.68557e+06	6.45824e+06	1	799114	9	1089	45	3
799800	90	525610	Papakura East	904	Red Hill Ward	9	Papakura District	02	Auckland Region	2.68508e+06	6.45839e+06	1	799800	10	1146	40	3
406502	63	515431	Surrey Crescent	701	Western Bays Ward	7	Auckland City	02	Auckland Region	2.66516e+06	6.48017e+06	1	406502	5	966	22	2
2764900	201	598500	Geraldine	6401	Geraldine Ward	64	Timaru District	13	Canterbury Region	2.36912e+06	5.67688e+06	1	2764900	6	982	70	2
2764700	150	598500	Geraldine	6401	Geraldine Ward	64	Timaru District	13	Canterbury Region	2.36907e+06	5.67717e+06	1	2764700	5	963	52	2
406800	87	515420	Grey Lynn East	701	Western Bays Ward	7	Auckland City	02	Auckland Region	2.66563e+06	6.48052e+06	1	406800	6	985	30	2
1585901	60	551400	Moturoa	3301	New Plymouth City Ward	33	New Plymouth District	07	Taranaki Region	2.5992e+06	6.23682e+06	1	1585901	5	953	21	2
1585902	24	551400	Moturoa	3301	New Plymouth City Ward	33	New Plymouth District	07	Taranaki Region	2.59929e+06	6.2368e+06	1	1585902	5	953	8	2
1586500	63	551400	Moturoa	3301	New Plymouth City Ward	33	New Plymouth District	07	Taranaki Region	2.60034e+06	6.2374e+06	1	1586500	7	1003	22	2
799108	111	525610	Papakura East	904	Red Hill Ward	9	Papakura District	02	Auckland Region	2.68544e+06	6.45826e+06	1	799108	9	1111	50	3
800000	141	525610	Papakura East	904	Red Hill Ward	9	Papakura District	02	Auckland Region	2.68513e+06	6.45826e+06	1	800000	9	1131	63	3
2765100	69	598500	Geraldine	6401	Geraldine Ward	64	Timaru District	13	Canterbury Region	2.36952e+06	5.67614e+06	1	2765100	4	947	24	2
1586202	18	551400	Moturoa	3301	New Plymouth City Ward	33	New Plymouth District	07	Taranaki Region	2.60007e+06	6.23724e+06	1	1586202	7	1003	6	2
1585400	126	551400	Moturoa	3301	New Plymouth City Ward	33	New Plymouth District	07	Taranaki Region	2.59961e+06	6.23701e+06	1	1585400	8	1039	57	3
1585100	87	551400	Moturoa	3301	New Plymouth City Ward	33	New Plymouth District	07	Taranaki Region	2.5992e+06	6.23715e+06	1	1585100	9	1091	39	3
799110	150	525610	Papakura East	904	Red Hill Ward	9	Papakura District	02	Auckland Region	2.68545e+06	6.45804e+06	1	799110	3	919	50	1
799109	156	525610	Papakura East	904	Red Hill Ward	9	Papakura District	02	Auckland Region	2.68543e+06	6.45814e+06	1	799109	10	1427	70	3
799500	255	525610	Papakura East	904	Red Hill Ward	9	Papakura District	02	Auckland Region	2.6852e+06	6.45873e+06	1	799500	9	1131	115	3
1585200	135	551400	Moturoa	3301	New Plymouth City Ward	33	New Plymouth District	07	Taranaki Region	2.5996e+06	6.23743e+06	1	1585200	9	1133	61	3
1585000	120	551400	Moturoa	3301	New Plymouth City Ward	33	New Plymouth District	07	Taranaki Region	2.59933e+06	6.23741e+06	1	1585000	5	966	42	2
799700	237	525610	Papakura East	904	Red Hill Ward	9	Papakura District	02	Auckland Region	2.6852e+06	6.45848e+06	1	799700	10	1146	107	3
799600	117	525610	Papakura East	904	Red Hill Ward	9	Papakura District	02	Auckland Region	2.685e+06	6.4586e+06	1	799600	9	1131	53	3
799105	168	525610	Papakura East	904	Red Hill Ward	9	Papakura District	02	Auckland Region	2.68546e+06	6.45864e+06	1	799105	10	1418	76	3
1586300	12	551400	Moturoa	3301	New Plymouth City Ward	33	New Plymouth District	07	Taranaki Region	2.60004e+06	6.23762e+06	1	1586300	7	1003	4	2
406201	36	515431	Surrey Crescent	701	Western Bays Ward	7	Auckland City	02	Auckland Region	2.66476e+06	6.48011e+06	1	406201	8	1040	16	3
799107	141	525610	Papakura East	904	Red Hill Ward	9	Papakura District	02	Auckland Region	2.68546e+06	6.45845e+06	1	799107	10	1154	63	3
799106	141	525610	Papakura East	904	Red Hill Ward	9	Papakura District	02	Auckland Region	2.68535e+06	6.45849e+06	1	799106	10	1183	63	3
799900	120	525610	Papakura East	904	Red Hill Ward	9	Papakura District	02	Auckland Region	2.68497e+06	6.45839e+06	1	799900	9	1133	54	3
2764600	39	598500	Geraldine	6401	Geraldine Ward	64	Timaru District	13	Canterbury Region	2.36891e+06	5.6775e+06	1	2764600	7	1008	14	2
2764800	123	598500	Geraldine	6401	Geraldine Ward	64	Timaru District	13	Canterbury Region	2.3695e+06	5.67679e+06	1	2764800	5	966	43	2
405300	156	515431	Surrey Crescent	701	Western Bays Ward	7	Auckland City	02	Auckland Region	2.66498e+06	6.4805e+06	1	405300	6	977	55	2
406600	162	515431	Surrey Crescent	701	Western Bays Ward	7	Auckland City	02	Auckland Region	2.66521e+06	6.48033e+06	1	406600	7	1015	57	2
1586201	39	551400	Moturoa	3301	New Plymouth City Ward	33	New Plymouth District	07	Taranaki Region	2.59999e+06	6.23741e+06	1	1586201	7	1003	14	2
1585300	117	551400	Moturoa	3301	New Plymouth City Ward	33	New Plymouth District	07	Taranaki Region	2.59934e+06	6.23713e+06	1	1585300	8	1057	53	3
405800	117	515431	Surrey Crescent	701	Western Bays Ward	7	Auckland City	02	Auckland Region	2.66515e+06	6.48045e+06	1	405800	8	1050	53	3
406501	78	515431	Surrey Crescent	701	Western Bays Ward	7	Auckland City	02	Auckland Region	2.66515e+06	6.48028e+06	1	406501	5	966	27	2
409900	51	515420	Grey Lynn East	701	Western Bays Ward	7	Auckland City	02	Auckland Region	2.66605e+06	6.48047e+06	1	409900	4	941	18	2
3030106	78	608600	Cromwell	6901	Cromwell Ward	69	Central Otago District	14	Otago Region	2.21073e+06	5.56649e+06	1	3030106	5	967	27	2
1587200	120	551400	Moturoa	3301	New Plymouth City Ward	33	New Plymouth District	07	Taranaki Region	2.60106e+06	6.23773e+06	1	1587200	5	966	42	2
1587600	36	551400	Moturoa	3301	New Plymouth City Ward	33	New Plymouth District	07	Taranaki Region	2.60134e+06	6.2378e+06	1	1587600	8	1049	16	3
1587700	3	551400	Moturoa	3301	New Plymouth City Ward	33	New Plymouth District	07	Taranaki Region	2.59924e+06	6.23782e+06	1	1587700	8	1049	1	3
800307	111	525700	Red Hill	904	Red Hill Ward	9	Papakura District	02	Auckland Region	2.68549e+06	6.45725e+06	1	800307	10	1234	50	3
800303	165	525700	Red Hill	904	Red Hill Ward	9	Papakura District	02	Auckland Region	2.68567e+06	6.45719e+06	1	800303	10	1146	74	3
1194600	87	536810	Mt Maunganui North	2301	Mount Maunganui-Papamoa Ward	23	Tauranga City	04	Bay of Plenty Region	2.79075e+06	6.3915e+06	1	1194600	5	968	30	2
1194800	72	536810	Mt Maunganui North	2301	Mount Maunganui-Papamoa Ward	23	Tauranga City	04	Bay of Plenty Region	2.79084e+06	6.39141e+06	1	1194800	5	968	25	2
408000	66	515410	Grey Lynn West	701	Western Bays Ward	7	Auckland City	02	Auckland Region	2.66537e+06	6.4807e+06	1	408000	6	985	23	2
1194200	24	536810	Mt Maunganui North	2301	Mount Maunganui-Papamoa Ward	23	Tauranga City	04	Bay of Plenty Region	2.79057e+06	6.39181e+06	1	1194200	4	948	8	2
3029500	78	608600	Cromwell	6901	Cromwell Ward	69	Central Otago District	14	Otago Region	2.21146e+06	5.56698e+06	1	3029500	5	962	27	2
1587501	81	551400	Moturoa	3301	New Plymouth City Ward	33	New Plymouth District	07	Taranaki Region	2.6014e+06	6.23768e+06	1	1587501	8	1049	36	3
1586900	162	551400	Moturoa	3301	New Plymouth City Ward	33	New Plymouth District	07	Taranaki Region	2.60054e+06	6.23761e+06	1	1586900	5	956	57	2
407800	105	515410	Grey Lynn West	701	Western Bays Ward	7	Auckland City	02	Auckland Region	2.66561e+06	6.48095e+06	1	407800	3	919	35	1
406900	90	515420	Grey Lynn East	701	Western Bays Ward	7	Auckland City	02	Auckland Region	2.66556e+06	6.48046e+06	1	406900	5	969	31	2
407700	90	515420	Grey Lynn East	701	Western Bays Ward	7	Auckland City	02	Auckland Region	2.66571e+06	6.481e+06	1	407700	2	917	30	1
408200	69	515420	Grey Lynn East	701	Western Bays Ward	7	Auckland City	02	Auckland Region	2.66578e+06	6.48084e+06	1	408200	4	952	24	2
407600	96	515410	Grey Lynn West	701	Western Bays Ward	7	Auckland City	02	Auckland Region	2.6654e+06	6.48124e+06	1	407600	4	952	34	2
1588200	156	551900	Kawaroa	3301	New Plymouth City Ward	33	New Plymouth District	07	Taranaki Region	2.60182e+06	6.238e+06	1	1588200	7	1027	55	2
1588100	165	551900	Kawaroa	3301	New Plymouth City Ward	33	New Plymouth District	07	Taranaki Region	2.6016e+06	6.23793e+06	1	1588100	6	986	58	2
800313	114	525700	Red Hill	904	Red Hill Ward	9	Papakura District	02	Auckland Region	2.68559e+06	6.45774e+06	1	800313	10	1185	51	3
800314	111	525700	Red Hill	904	Red Hill Ward	9	Papakura District	02	Auckland Region	2.68552e+06	6.45769e+06	1	800314	10	1368	50	3
407100	63	515420	Grey Lynn East	701	Western Bays Ward	7	Auckland City	02	Auckland Region	2.66556e+06	6.48028e+06	1	407100	6	979	22	2
1194500	165	536810	Mt Maunganui North	2301	Mount Maunganui-Papamoa Ward	23	Tauranga City	04	Bay of Plenty Region	2.79074e+06	6.39165e+06	1	1194500	4	948	58	2
407300	69	515420	Grey Lynn East	701	Western Bays Ward	7	Auckland City	02	Auckland Region	2.66574e+06	6.48038e+06	1	407300	5	969	24	2
3029700	114	608600	Cromwell	6901	Cromwell Ward	69	Central Otago District	14	Otago Region	2.21135e+06	5.56679e+06	1	3029700	6	997	40	2
408500	174	515410	Grey Lynn West	701	Western Bays Ward	7	Auckland City	02	Auckland Region	2.66549e+06	6.48122e+06	1	408500	4	944	61	2
1586700	102	551400	Moturoa	3301	New Plymouth City Ward	33	New Plymouth District	07	Taranaki Region	2.60068e+06	6.23745e+06	1	1586700	9	1112	46	3
1587400	30	551400	Moturoa	3301	New Plymouth City Ward	33	New Plymouth District	07	Taranaki Region	2.60133e+06	6.23754e+06	1	1587400	5	956	10	2
407500	72	515410	Grey Lynn West	701	Western Bays Ward	7	Auckland City	02	Auckland Region	2.66528e+06	6.48128e+06	1	407500	4	952	25	2
800310	144	525700	Red Hill	904	Red Hill Ward	9	Papakura District	02	Auckland Region	2.68546e+06	6.45752e+06	1	800310	10	1397	65	3
800315	111	525700	Red Hill	904	Red Hill Ward	9	Papakura District	02	Auckland Region	2.68571e+06	6.4575e+06	1	800315	10	1238	50	3
407900	159	515410	Grey Lynn West	701	Western Bays Ward	7	Auckland City	02	Auckland Region	2.66538e+06	6.48082e+06	1	407900	6	997	56	2
407000	75	515420	Grey Lynn East	701	Western Bays Ward	7	Auckland City	02	Auckland Region	2.66548e+06	6.48039e+06	1	407000	5	969	26	2
3030000	69	608600	Cromwell	6901	Cromwell Ward	69	Central Otago District	14	Otago Region	2.21124e+06	5.56656e+06	1	3030000	6	997	24	2
3029900	75	608600	Cromwell	6901	Cromwell Ward	69	Central Otago District	14	Otago Region	2.21145e+06	5.56647e+06	1	3029900	4	951	26	2
1586600	57	551400	Moturoa	3301	New Plymouth City Ward	33	New Plymouth District	07	Taranaki Region	2.60045e+06	6.23734e+06	1	1586600	9	1112	26	3
800311	66	525700	Red Hill	904	Red Hill Ward	9	Papakura District	02	Auckland Region	2.68562e+06	6.45745e+06	1	800311	10	1390	30	3
1194700	60	536810	Mt Maunganui North	2301	Mount Maunganui-Papamoa Ward	23	Tauranga City	04	Bay of Plenty Region	2.79098e+06	6.39154e+06	1	1194700	5	968	21	2
408400	39	515410	Grey Lynn West	701	Western Bays Ward	7	Auckland City	02	Auckland Region	2.66527e+06	6.48099e+06	1	408400	6	997	14	2
408100	153	515410	Grey Lynn West	701	Western Bays Ward	7	Auckland City	02	Auckland Region	2.66561e+06	6.48067e+06	1	408100	4	940	54	2
408600	84	515410	Grey Lynn West	701	Western Bays Ward	7	Auckland City	02	Auckland Region	2.66559e+06	6.48118e+06	1	408600	3	919	28	1
407200	48	515420	Grey Lynn East	701	Western Bays Ward	7	Auckland City	02	Auckland Region	2.66565e+06	6.48032e+06	1	407200	5	969	17	2
1194900	96	536810	Mt Maunganui North	2301	Mount Maunganui-Papamoa Ward	23	Tauranga City	04	Bay of Plenty Region	2.79093e+06	6.39133e+06	1	1194900	5	974	34	2
3029400	189	608600	Cromwell	6901	Cromwell Ward	69	Central Otago District	14	Otago Region	2.21116e+06	5.56689e+06	1	3029400	5	964	66	2
407400	99	515420	Grey Lynn East	701	Western Bays Ward	7	Auckland City	02	Auckland Region	2.66583e+06	6.48042e+06	1	407400	5	954	35	2
1195000	69	536810	Mt Maunganui North	2301	Mount Maunganui-Papamoa Ward	23	Tauranga City	04	Bay of Plenty Region	2.79093e+06	6.39115e+06	1	1195000	5	974	24	2
408300	78	515420	Grey Lynn East	701	Western Bays Ward	7	Auckland City	02	Auckland Region	2.66587e+06	6.48089e+06	1	408300	4	952	27	2
3029600	90	608600	Cromwell	6901	Cromwell Ward	69	Central Otago District	14	Otago Region	2.21167e+06	5.56698e+06	1	3029600	5	962	31	2
1586800	120	551400	Moturoa	3301	New Plymouth City Ward	33	New Plymouth District	07	Taranaki Region	2.60064e+06	6.23755e+06	1	1586800	7	1023	42	2
1587502	18	551501	Lynmouth	3301	New Plymouth City Ward	33	New Plymouth District	07	Taranaki Region	2.60151e+06	6.23758e+06	1	1587502	8	1049	8	3
1587800	3	551400	Moturoa	3301	New Plymouth City Ward	33	New Plymouth District	07	Taranaki Region	2.59933e+06	6.23805e+06	1	1587800	8	1049	1	3
800308	87	525700	Red Hill	904	Red Hill Ward	9	Papakura District	02	Auckland Region	2.68532e+06	6.45769e+06	1	800308	10	1282	39	3
800309	78	525700	Red Hill	904	Red Hill Ward	9	Papakura District	02	Auckland Region	2.68535e+06	6.45754e+06	1	800309	10	1390	35	3
1194400	96	536810	Mt Maunganui North	2301	Mount Maunganui-Papamoa Ward	23	Tauranga City	04	Bay of Plenty Region	2.7906e+06	6.3916e+06	1	1194400	8	1034	43	3
3029800	111	608600	Cromwell	6901	Cromwell Ward	69	Central Otago District	14	Otago Region	2.21159e+06	5.56666e+06	1	3029800	4	951	39	2
2901000	3	603100	Stuart St-Frederick St	7103	Cargill Ward	71	Dunedin City	14	Otago Region	2.31627e+06	5.47864e+06	1	2901000	9	1128	1	3
409400	81	515420	Grey Lynn East	701	Western Bays Ward	7	Auckland City	02	Auckland Region	2.6658e+06	6.48064e+06	1	409400	4	937	28	2
1588700	105	551900	Kawaroa	3301	New Plymouth City Ward	33	New Plymouth District	07	Taranaki Region	2.60168e+06	6.23773e+06	1	1588700	7	1012	37	2
1588300	75	551900	Kawaroa	3301	New Plymouth City Ward	33	New Plymouth District	07	Taranaki Region	2.60205e+06	6.23812e+06	1	1588300	8	1037	34	3
1195400	195	536810	Mt Maunganui North	2301	Mount Maunganui-Papamoa Ward	23	Tauranga City	04	Bay of Plenty Region	2.79136e+06	6.39128e+06	1	1195400	4	951	68	2
1196200	183	536810	Mt Maunganui North	2301	Mount Maunganui-Papamoa Ward	23	Tauranga City	04	Bay of Plenty Region	2.79161e+06	6.39047e+06	1	1196200	7	1012	64	2
1196400	159	536810	Mt Maunganui North	2301	Mount Maunganui-Papamoa Ward	23	Tauranga City	04	Bay of Plenty Region	2.79217e+06	6.39024e+06	1	1196400	5	954	56	2
3030500	18	608600	Cromwell	6901	Cromwell Ward	69	Central Otago District	14	Otago Region	2.21136e+06	5.56638e+06	1	3030500	6	981	6	2
1196500	258	536810	Mt Maunganui North	2301	Mount Maunganui-Papamoa Ward	23	Tauranga City	04	Bay of Plenty Region	2.79208e+06	6.39017e+06	1	1196500	3	928	85	1
1195200	69	536810	Mt Maunganui North	2301	Mount Maunganui-Papamoa Ward	23	Tauranga City	04	Bay of Plenty Region	2.79117e+06	6.39114e+06	1	1195200	5	960	24	2
1195100	39	536810	Mt Maunganui North	2301	Mount Maunganui-Papamoa Ward	23	Tauranga City	04	Bay of Plenty Region	2.79104e+06	6.39119e+06	1	1195100	5	960	14	2
410000	168	515420	Grey Lynn East	701	Western Bays Ward	7	Auckland City	02	Auckland Region	2.66609e+06	6.48059e+06	1	410000	5	971	59	2
2899700	48	603000	High St-Stuart St	7103	Cargill Ward	71	Dunedin City	14	Otago Region	2.3162e+06	5.47838e+06	1	2899700	7	1026	17	2
409700	96	515420	Grey Lynn East	701	Western Bays Ward	7	Auckland City	02	Auckland Region	2.66591e+06	6.48048e+06	1	409700	4	941	34	2
1497600	105	548000	Mayfair	3005	Hastings Ward	30	Hastings District	06	Hawke's Bay Region	2.84107e+06	6.16682e+06	1	1497600	6	996	37	2
408800	78	515420	Grey Lynn East	701	Western Bays Ward	7	Auckland City	02	Auckland Region	2.6658e+06	6.48118e+06	1	408800	2	906	26	1
1588400	108	551900	Kawaroa	3301	New Plymouth City Ward	33	New Plymouth District	07	Taranaki Region	2.60207e+06	6.23802e+06	1	1588400	8	1057	49	3
1196700	255	536810	Mt Maunganui North	2301	Mount Maunganui-Papamoa Ward	23	Tauranga City	04	Bay of Plenty Region	2.79199e+06	6.39001e+06	1	1196700	5	958	89	2
1195600	48	536810	Mt Maunganui North	2301	Mount Maunganui-Papamoa Ward	23	Tauranga City	04	Bay of Plenty Region	2.79111e+06	6.39098e+06	1	1195600	4	942	17	2
1195500	63	536810	Mt Maunganui North	2301	Mount Maunganui-Papamoa Ward	23	Tauranga City	04	Bay of Plenty Region	2.791e+06	6.39095e+06	1	1195500	4	942	22	2
2899800	42	603000	High St-Stuart St	7103	Cargill Ward	71	Dunedin City	14	Otago Region	2.31629e+06	5.47839e+06	1	2899800	7	1022	15	2
408900	87	515420	Grey Lynn East	701	Western Bays Ward	7	Auckland City	02	Auckland Region	2.6659e+06	6.48119e+06	1	408900	2	906	29	1
2769100	48	598000	Winchester	6403	Temuka Ward	64	Timaru District	13	Canterbury Region	2.37244e+06	5.66759e+06	1	2769100	3	928	16	1
2769000	39	598000	Winchester	6403	Temuka Ward	64	Timaru District	13	Canterbury Region	2.37231e+06	5.66745e+06	1	2769000	3	928	13	1
2768900	117	598000	Winchester	6403	Temuka Ward	64	Timaru District	13	Canterbury Region	2.37245e+06	5.66791e+06	1	2768900	6	979	41	2
409500	96	515420	Grey Lynn East	701	Western Bays Ward	7	Auckland City	02	Auckland Region	2.66588e+06	6.4807e+06	1	409500	4	937	34	2
2745801	12	597741	Chertsey	6302	Rakaia Ward	63	Ashburton District	13	Canterbury Region	2.41725e+06	5.70626e+06	1	2745801	2	915	4	1
278006	57	512901	Parrs Park	602	Waitakere Ward	6	Waitakere City	02	Auckland Region	2.65514e+06	6.4764e+06	1	278006	9	1099	26	3
278300	282	512901	Parrs Park	602	Waitakere Ward	6	Waitakere City	02	Auckland Region	2.65528e+06	6.47555e+06	1	278300	5	954	99	2
3030103	102	608600	Cromwell	6901	Cromwell Ward	69	Central Otago District	14	Otago Region	2.21065e+06	5.56687e+06	1	3030103	3	920	34	1
1589700	180	551900	Kawaroa	3301	New Plymouth City Ward	33	New Plymouth District	07	Taranaki Region	2.60179e+06	6.23735e+06	1	1589700	1	896	59	1
1589300	78	551900	Kawaroa	3301	New Plymouth City Ward	33	New Plymouth District	07	Taranaki Region	2.60219e+06	6.23754e+06	1	1589300	8	1037	35	3
1588500	96	551900	Kawaroa	3301	New Plymouth City Ward	33	New Plymouth District	07	Taranaki Region	2.60212e+06	6.23794e+06	1	1588500	9	1123	43	3
1196000	93	536810	Mt Maunganui North	2301	Mount Maunganui-Papamoa Ward	23	Tauranga City	04	Bay of Plenty Region	2.79144e+06	6.39075e+06	1	1196000	6	977	33	2
1196300	192	536810	Mt Maunganui North	2301	Mount Maunganui-Papamoa Ward	23	Tauranga City	04	Bay of Plenty Region	2.7918e+06	6.39058e+06	1	1196300	4	938	67	2
278404	183	512901	Parrs Park	602	Waitakere Ward	6	Waitakere City	02	Auckland Region	2.65552e+06	6.47557e+06	1	278404	8	1033	82	3
409100	72	515420	Grey Lynn East	701	Western Bays Ward	7	Auckland City	02	Auckland Region	2.66611e+06	6.48122e+06	1	409100	2	917	24	1
3030201	249	608600	Cromwell	6901	Cromwell Ward	69	Central Otago District	14	Otago Region	2.21044e+06	5.56624e+06	1	3030201	6	981	87	2
1589600	81	551900	Kawaroa	3301	New Plymouth City Ward	33	New Plymouth District	07	Taranaki Region	2.60193e+06	6.23723e+06	1	1589600	8	1055	36	3
1589500	39	551900	Kawaroa	3301	New Plymouth City Ward	33	New Plymouth District	07	Taranaki Region	2.60203e+06	6.23737e+06	1	1589500	5	965	14	2
1588600	126	551900	Kawaroa	3301	New Plymouth City Ward	33	New Plymouth District	07	Taranaki Region	2.60188e+06	6.2378e+06	1	1588600	8	1068	57	3
1589000	63	551900	Kawaroa	3301	New Plymouth City Ward	33	New Plymouth District	07	Taranaki Region	2.60211e+06	6.23778e+06	1	1589000	7	1027	22	2
409300	87	515420	Grey Lynn East	701	Western Bays Ward	7	Auckland City	02	Auckland Region	2.66572e+06	6.48058e+06	1	409300	4	951	30	2
3030400	15	608600	Cromwell	6901	Cromwell Ward	69	Central Otago District	14	Otago Region	2.21119e+06	5.5664e+06	1	3030400	6	981	5	2
3030300	18	608600	Cromwell	6901	Cromwell Ward	69	Central Otago District	14	Otago Region	2.21105e+06	5.56641e+06	1	3030300	6	981	6	2
410200	42	515420	Grey Lynn East	701	Western Bays Ward	7	Auckland City	02	Auckland Region	2.66592e+06	6.48105e+06	1	410200	5	959	15	2
278007	192	512901	Parrs Park	602	Waitakere Ward	6	Waitakere City	02	Auckland Region	2.65498e+06	6.47634e+06	1	278007	9	1099	86	3
1195300	108	536810	Mt Maunganui North	2301	Mount Maunganui-Papamoa Ward	23	Tauranga City	04	Bay of Plenty Region	2.79127e+06	6.3912e+06	1	1195300	2	907	36	1
1510100	66	548831	Te Mata	3008	Havelock North Ward	30	Hastings District	06	Hawke's Bay Region	2.84413e+06	6.16352e+06	1	1510100	5	970	23	2
278901	186	512901	Parrs Park	602	Waitakere Ward	6	Waitakere City	02	Auckland Region	2.65513e+06	6.47581e+06	1	278901	5	958	65	2
410300	66	515420	Grey Lynn East	701	Western Bays Ward	7	Auckland City	02	Auckland Region	2.66595e+06	6.48094e+06	1	410300	3	934	22	1
278510	222	512901	Parrs Park	602	Waitakere Ward	6	Waitakere City	02	Auckland Region	2.65574e+06	6.47562e+06	1	278510	10	1280	100	3
409000	72	515420	Grey Lynn East	701	Western Bays Ward	7	Auckland City	02	Auckland Region	2.666e+06	6.4812e+06	1	409000	3	925	24	1
2121600	108	572900	Thorndon-Tinakori Road	4703	Lambton Ward	47	Wellington City	09	Wellington Region	2.6584e+06	5.99063e+06	1	2121600	5	956	38	2
1589100	36	551900	Kawaroa	3301	New Plymouth City Ward	33	New Plymouth District	07	Taranaki Region	2.60215e+06	6.23762e+06	1	1589100	9	1123	16	3
1589800	60	551900	Kawaroa	3301	New Plymouth City Ward	33	New Plymouth District	07	Taranaki Region	2.60242e+06	6.23763e+06	1	1589800	8	1037	27	3
1588900	72	551900	Kawaroa	3301	New Plymouth City Ward	33	New Plymouth District	07	Taranaki Region	2.60195e+06	6.23766e+06	1	1588900	8	1055	32	3
1196600	192	536810	Mt Maunganui North	2301	Mount Maunganui-Papamoa Ward	23	Tauranga City	04	Bay of Plenty Region	2.79181e+06	6.39023e+06	1	1196600	3	934	63	1
1195800	84	536810	Mt Maunganui North	2301	Mount Maunganui-Papamoa Ward	23	Tauranga City	04	Bay of Plenty Region	2.79159e+06	6.39095e+06	1	1195800	5	963	29	2
410100	87	515420	Grey Lynn East	701	Western Bays Ward	7	Auckland City	02	Auckland Region	2.66581e+06	6.48103e+06	1	410100	5	959	30	2
278005	207	512901	Parrs Park	602	Waitakere Ward	6	Waitakere City	02	Auckland Region	2.65501e+06	6.47651e+06	1	278005	9	1134	93	3
1589200	132	551900	Kawaroa	3301	New Plymouth City Ward	33	New Plymouth District	07	Taranaki Region	2.602e+06	6.23754e+06	1	1589200	7	1009	46	2
1589900	57	551900	Kawaroa	3301	New Plymouth City Ward	33	New Plymouth District	07	Taranaki Region	2.60245e+06	6.23754e+06	1	1589900	7	1008	20	2
1196100	108	536810	Mt Maunganui North	2301	Mount Maunganui-Papamoa Ward	23	Tauranga City	04	Bay of Plenty Region	2.79133e+06	6.39071e+06	1	1196100	5	963	38	2
408700	198	515420	Grey Lynn East	701	Western Bays Ward	7	Auckland City	02	Auckland Region	2.6657e+06	6.48117e+06	1	408700	3	925	65	1
278103	309	512901	Parrs Park	602	Waitakere Ward	6	Waitakere City	02	Auckland Region	2.65533e+06	6.47628e+06	1	278103	9	1095	139	3
409200	21	515420	Grey Lynn East	701	Western Bays Ward	7	Auckland City	02	Auckland Region	2.66623e+06	6.48119e+06	1	409200	3	925	7	1
3030104	123	608600	Cromwell	6901	Cromwell Ward	69	Central Otago District	14	Otago Region	2.21068e+06	5.56674e+06	1	3030104	7	1004	43	2
3030105	102	608600	Cromwell	6901	Cromwell Ward	69	Central Otago District	14	Otago Region	2.21068e+06	5.56662e+06	1	3030105	5	967	36	2
1589400	123	551900	Kawaroa	3301	New Plymouth City Ward	33	New Plymouth District	07	Taranaki Region	2.60225e+06	6.23743e+06	1	1589400	5	965	43	2
409600	84	515420	Grey Lynn East	701	Western Bays Ward	7	Auckland City	02	Auckland Region	2.66596e+06	6.48076e+06	1	409600	5	971	29	2
409800	66	515420	Grey Lynn East	701	Western Bays Ward	7	Auckland City	02	Auckland Region	2.66597e+06	6.48058e+06	1	409800	4	951	23	2
1203207	42	536810	Mt Maunganui North	2301	Mount Maunganui-Papamoa Ward	23	Tauranga City	04	Bay of Plenty Region	2.79176e+06	6.38982e+06	1	1203207	9	1110	19	3
2771800	66	598202	Otipua Creek-Washdyke Flat	6404	Timaru Ward	64	Timaru District	13	Canterbury Region	2.36968e+06	5.6503e+06	1	2771800	4	945	23	2
543800	186	518101	Mt Eden North	703	Eden-Albert Ward	7	Auckland City	02	Auckland Region	2.66728e+06	6.47967e+06	1	543800	5	974	65	2
412402	12	514200	Newton	704	Hobson Ward	7	Auckland City	02	Auckland Region	2.66728e+06	6.48061e+06	1	412402	6	984	4	2
412500	72	514200	Newton	704	Hobson Ward	7	Auckland City	02	Auckland Region	2.66729e+06	6.48069e+06	1	412500	6	984	25	2
281300	186	513013	McLaren Park	602	Waitakere Ward	6	Waitakere City	02	Auckland Region	2.65442e+06	6.47672e+06	1	281300	8	1061	84	3
3032900	18	609301	Queenstown Bay	7001	Queenstown-Wakatipu Ward	70	Queenstown-Lakes District	14	Otago Region	2.16818e+06	5.56636e+06	1	3032900	7	1000	6	2
410700	120	515420	Grey Lynn East	701	Western Bays Ward	7	Auckland City	02	Auckland Region	2.66618e+06	6.48065e+06	1	410700	1	895	40	1
1590400	111	552002	Marsland Hill	3301	New Plymouth City Ward	33	New Plymouth District	07	Taranaki Region	2.60298e+06	6.23759e+06	1	1590400	5	970	39	2
1591400	39	551800	New Plymouth Central	3301	New Plymouth City Ward	33	New Plymouth District	07	Taranaki Region	2.60238e+06	6.23771e+06	1	1591400	8	1041	18	3
1592100	6	551800	New Plymouth Central	3301	New Plymouth City Ward	33	New Plymouth District	07	Taranaki Region	2.60289e+06	6.2378e+06	1	1592100	6	999	2	2
1198000	75	536821	Omanu	2301	Mount Maunganui-Papamoa Ward	23	Tauranga City	04	Bay of Plenty Region	2.79284e+06	6.38927e+06	1	1198000	7	1011	26	2
1198300	99	536821	Omanu	2301	Mount Maunganui-Papamoa Ward	23	Tauranga City	04	Bay of Plenty Region	2.793e+06	6.38933e+06	1	1198300	7	1011	35	2
1197500	135	536821	Omanu	2301	Mount Maunganui-Papamoa Ward	23	Tauranga City	04	Bay of Plenty Region	2.7925e+06	6.38941e+06	1	1197500	3	922	45	1
1197400	117	536821	Omanu	2301	Mount Maunganui-Papamoa Ward	23	Tauranga City	04	Bay of Plenty Region	2.79238e+06	6.38937e+06	1	1197400	8	1036	53	3
1197900	69	536821	Omanu	2301	Mount Maunganui-Papamoa Ward	23	Tauranga City	04	Bay of Plenty Region	2.79274e+06	6.38922e+06	1	1197900	8	1046	31	3
411700	27	514200	Newton	701	Western Bays Ward	7	Auckland City	02	Auckland Region	2.66676e+06	6.48091e+06	1	411700	6	990	9	2
410900	54	515420	Grey Lynn East	701	Western Bays Ward	7	Auckland City	02	Auckland Region	2.66615e+06	6.48108e+06	1	410900	3	929	18	1
2901600	45	603100	Stuart St-Frederick St	7103	Cargill Ward	71	Dunedin City	14	Otago Region	2.31652e+06	5.47859e+06	1	2901600	9	1128	20	3
410500	114	515420	Grey Lynn East	701	Western Bays Ward	7	Auckland City	02	Auckland Region	2.66604e+06	6.48082e+06	1	410500	5	958	40	2
410600	108	515420	Grey Lynn East	701	Western Bays Ward	7	Auckland City	02	Auckland Region	2.66612e+06	6.48088e+06	1	410600	3	934	36	1
3033400	9	609301	Queenstown Bay	7001	Queenstown-Wakatipu Ward	70	Queenstown-Lakes District	14	Otago Region	2.16817e+06	5.5662e+06	1	3033400	7	1019	3	2
1590500	90	551800	New Plymouth Central	3301	New Plymouth City Ward	33	New Plymouth District	07	Taranaki Region	2.60229e+06	6.23814e+06	1	1590500	6	991	31	2
1197800	129	536821	Omanu	2301	Mount Maunganui-Papamoa Ward	23	Tauranga City	04	Bay of Plenty Region	2.79262e+06	6.38913e+06	1	1197800	8	1046	58	3
1198200	228	536821	Omanu	2301	Mount Maunganui-Papamoa Ward	23	Tauranga City	04	Bay of Plenty Region	2.79307e+06	6.38912e+06	1	1198200	5	969	80	2
410800	132	515420	Grey Lynn East	701	Western Bays Ward	7	Auckland City	02	Auckland Region	2.66624e+06	6.48073e+06	1	410800	2	914	44	1
411900	57	514200	Newton	701	Western Bays Ward	7	Auckland City	02	Auckland Region	2.66686e+06	6.481e+06	1	411900	6	990	20	2
2769900	12	598312	Orari	6403	Temuka Ward	64	Timaru District	13	Canterbury Region	2.37238e+06	5.66855e+06	1	2769900	2	900	4	1
411500	45	515420	Grey Lynn East	701	Western Bays Ward	7	Auckland City	02	Auckland Region	2.66648e+06	6.48091e+06	1	411500	3	922	15	1
1590800	75	551800	New Plymouth Central	3301	New Plymouth City Ward	33	New Plymouth District	07	Taranaki Region	2.60251e+06	6.23808e+06	1	1590800	9	1077	34	3
542700	519	518101	Mt Eden North	703	Eden-Albert Ward	7	Auckland City	02	Auckland Region	2.66768e+06	6.48e+06	1	542700	7	1020	182	2
411200	114	515420	Grey Lynn East	701	Western Bays Ward	7	Auckland City	02	Auckland Region	2.6662e+06	6.48094e+06	1	411200	2	915	38	1
3033201	87	609301	Queenstown Bay	7001	Queenstown-Wakatipu Ward	70	Queenstown-Lakes District	14	Otago Region	2.16826e+06	5.56683e+06	1	3033201	6	985	30	2
1591100	6	551800	New Plymouth Central	3301	New Plymouth City Ward	33	New Plymouth District	07	Taranaki Region	2.60245e+06	6.23791e+06	1	1591100	8	1041	3	3
1196800	135	536810	Mt Maunganui North	2301	Mount Maunganui-Papamoa Ward	23	Tauranga City	04	Bay of Plenty Region	2.79191e+06	6.38983e+06	1	1196800	6	976	47	2
1197200	219	536821	Omanu	2301	Mount Maunganui-Papamoa Ward	23	Tauranga City	04	Bay of Plenty Region	2.79235e+06	6.38972e+06	1	1197200	4	943	77	2
2901800	138	603100	Stuart St-Frederick St	7103	Cargill Ward	71	Dunedin City	14	Otago Region	2.31668e+06	5.47877e+06	1	2901800	10	1159	62	3
542600	135	518101	Mt Eden North	703	Eden-Albert Ward	7	Auckland City	02	Auckland Region	2.66753e+06	6.48003e+06	1	542600	4	950	47	2
542800	285	518101	Mt Eden North	703	Eden-Albert Ward	7	Auckland City	02	Auckland Region	2.6674e+06	6.47985e+06	1	542800	6	981	100	2
3033301	126	609301	Queenstown Bay	7001	Queenstown-Wakatipu Ward	70	Queenstown-Lakes District	14	Otago Region	2.16831e+06	5.56644e+06	1	3033301	3	927	42	1
3033302	87	609301	Queenstown Bay	7001	Queenstown-Wakatipu Ward	70	Queenstown-Lakes District	14	Otago Region	2.1684e+06	5.56655e+06	1	3033302	3	927	29	1
1590900	63	551800	New Plymouth Central	3301	New Plymouth City Ward	33	New Plymouth District	07	Taranaki Region	2.60224e+06	6.23783e+06	1	1590900	8	1041	28	3
1591500	3	551800	New Plymouth Central	3301	New Plymouth City Ward	33	New Plymouth District	07	Taranaki Region	2.60266e+06	6.23783e+06	1	1591500	6	999	1	2
411600	12	515420	Grey Lynn East	701	Western Bays Ward	7	Auckland City	02	Auckland Region	2.66657e+06	6.48096e+06	1	411600	3	922	4	1
1197000	174	536821	Omanu	2301	Mount Maunganui-Papamoa Ward	23	Tauranga City	04	Bay of Plenty Region	2.79212e+06	6.38959e+06	1	1197000	4	940	61	2
1197700	252	536821	Omanu	2301	Mount Maunganui-Papamoa Ward	23	Tauranga City	04	Bay of Plenty Region	2.79278e+06	6.38951e+06	1	1197700	5	960	88	2
1197600	111	536821	Omanu	2301	Mount Maunganui-Papamoa Ward	23	Tauranga City	04	Bay of Plenty Region	2.79262e+06	6.38946e+06	1	1197600	3	932	37	1
543100	96	518101	Mt Eden North	703	Eden-Albert Ward	7	Auckland City	02	Auckland Region	2.6674e+06	6.47959e+06	1	543100	3	934	32	1
3033000	42	609301	Queenstown Bay	7001	Queenstown-Wakatipu Ward	70	Queenstown-Lakes District	14	Otago Region	2.16801e+06	5.56625e+06	1	3033000	7	1000	15	2
280905	357	513012	Palm Heights	602	Waitakere Ward	6	Waitakere City	02	Auckland Region	2.6541e+06	6.47716e+06	1	280905	10	1147	161	3
411000	15	515420	Grey Lynn East	701	Western Bays Ward	7	Auckland City	02	Auckland Region	2.66641e+06	6.48111e+06	1	411000	2	915	5	1
411800	87	514200	Newton	701	Western Bays Ward	7	Auckland City	02	Auckland Region	2.6668e+06	6.48082e+06	1	411800	7	1007	30	2
3033100	153	609301	Queenstown Bay	7001	Queenstown-Wakatipu Ward	70	Queenstown-Lakes District	14	Otago Region	2.16792e+06	5.56613e+06	1	3033100	7	1000	54	2
1590300	87	552002	Marsland Hill	3301	New Plymouth City Ward	33	New Plymouth District	07	Taranaki Region	2.60272e+06	6.23764e+06	1	1590300	8	1035	39	3
1591700	18	551800	New Plymouth Central	3301	New Plymouth City Ward	33	New Plymouth District	07	Taranaki Region	2.6027e+06	6.23807e+06	1	1591700	6	999	6	2
1198500	192	536821	Omanu	2301	Mount Maunganui-Papamoa Ward	23	Tauranga City	04	Bay of Plenty Region	2.7929e+06	6.38889e+06	1	1198500	5	964	67	2
1198100	168	536821	Omanu	2301	Mount Maunganui-Papamoa Ward	23	Tauranga City	04	Bay of Plenty Region	2.79297e+06	6.38899e+06	1	1198100	2	901	55	1
1198400	141	536821	Omanu	2301	Mount Maunganui-Papamoa Ward	23	Tauranga City	04	Bay of Plenty Region	2.79281e+06	6.38878e+06	1	1198400	9	1112	63	3
542501	9	518101	Mt Eden North	704	Hobson Ward	7	Auckland City	02	Auckland Region	2.66741e+06	6.48011e+06	1	542501	5	971	3	2
412100	36	514200	Newton	704	Hobson Ward	7	Auckland City	02	Auckland Region	2.66719e+06	6.48111e+06	1	412100	6	990	13	2
542900	300	518101	Mt Eden North	703	Eden-Albert Ward	7	Auckland City	02	Auckland Region	2.66754e+06	6.47971e+06	1	542900	7	1020	105	2
410400	78	515420	Grey Lynn East	701	Western Bays Ward	7	Auckland City	02	Auckland Region	2.66602e+06	6.48103e+06	1	410400	3	929	26	1
1590200	78	552002	Marsland Hill	3301	New Plymouth City Ward	33	New Plymouth District	07	Taranaki Region	2.60276e+06	6.23754e+06	1	1590200	7	1006	27	2
1591200	3	551800	New Plymouth Central	3301	New Plymouth City Ward	33	New Plymouth District	07	Taranaki Region	2.60256e+06	6.23799e+06	1	1591200	8	1041	1	3
1590700	48	551800	New Plymouth Central	3301	New Plymouth City Ward	33	New Plymouth District	07	Taranaki Region	2.60234e+06	6.23802e+06	1	1590700	6	999	17	2
412000	72	514200	Newton	704	Hobson Ward	7	Auckland City	02	Auckland Region	2.6671e+06	6.48108e+06	1	412000	7	1007	25	2
1196900	144	536810	Mt Maunganui North	2301	Mount Maunganui-Papamoa Ward	23	Tauranga City	04	Bay of Plenty Region	2.79203e+06	6.38986e+06	1	1196900	6	992	50	2
1197300	213	536821	Omanu	2301	Mount Maunganui-Papamoa Ward	23	Tauranga City	04	Bay of Plenty Region	2.79253e+06	6.3898e+06	1	1197300	4	947	75	2
411100	36	515420	Grey Lynn East	701	Western Bays Ward	7	Auckland City	02	Auckland Region	2.66628e+06	6.481e+06	1	411100	2	915	12	1
1466708	234	548833	Te Mata Hills	3008	Havelock North Ward	30	Hastings District	06	Hawke's Bay Region	2.84479e+06	6.16309e+06	1	1466708	1	884	77	1
543000	48	518101	Mt Eden North	703	Eden-Albert Ward	7	Auckland City	02	Auckland Region	2.66784e+06	6.47972e+06	1	543000	7	1020	17	2
1590000	66	551900	Kawaroa	3301	New Plymouth City Ward	33	New Plymouth District	07	Taranaki Region	2.60248e+06	6.23738e+06	1	1590000	7	1008	23	2
411300	75	515420	Grey Lynn East	701	Western Bays Ward	7	Auckland City	02	Auckland Region	2.66632e+06	6.48078e+06	1	411300	3	922	25	1
411400	12	515420	Grey Lynn East	701	Western Bays Ward	7	Auckland City	02	Auckland Region	2.6664e+06	6.48085e+06	1	411400	3	922	4	1
1591000	33	551800	New Plymouth Central	3301	New Plymouth City Ward	33	New Plymouth District	07	Taranaki Region	2.60235e+06	6.23788e+06	1	1591000	8	1041	15	3
1197100	162	536821	Omanu	2301	Mount Maunganui-Papamoa Ward	23	Tauranga City	04	Bay of Plenty Region	2.79224e+06	6.38963e+06	1	1197100	3	923	53	1
546200	3	518101	Mt Eden North	703	Eden-Albert Ward	7	Auckland City	02	Auckland Region	2.66771e+06	6.47948e+06	1	546200	5	956	1	2
1594100	6	551800	New Plymouth Central	3301	New Plymouth City Ward	33	New Plymouth District	07	Taranaki Region	2.60395e+06	6.2383e+06	1	1594100	7	1013	2	2
281403	111	513013	McLaren Park	602	Waitakere Ward	6	Waitakere City	02	Auckland Region	2.65448e+06	6.47695e+06	1	281403	8	1063	50	3
2903200	21	603100	Stuart St-Frederick St	7103	Cargill Ward	71	Dunedin City	14	Otago Region	2.31615e+06	5.47859e+06	1	2903200	8	1032	9	3
412200	261	514200	Newton	704	Hobson Ward	7	Auckland City	02	Auckland Region	2.66736e+06	6.48107e+06	1	412200	6	995	91	2
281509	279	513013	McLaren Park	602	Waitakere Ward	6	Waitakere City	02	Auckland Region	2.65484e+06	6.47674e+06	1	281509	9	1113	126	3
3033900	105	609302	Queenstown Hill	7001	Queenstown-Wakatipu Ward	70	Queenstown-Lakes District	14	Otago Region	2.16848e+06	5.56613e+06	1	3033900	7	1019	37	2
1198900	189	536821	Omanu	2301	Mount Maunganui-Papamoa Ward	23	Tauranga City	04	Bay of Plenty Region	2.79357e+06	6.38885e+06	1	1198900	4	941	66	2
412302	162	514200	Newton	704	Hobson Ward	7	Auckland City	02	Auckland Region	2.6674e+06	6.48065e+06	1	412302	7	1005	57	2
413400	78	514000	Freemans Bay	701	Western Bays Ward	7	Auckland City	02	Auckland Region	2.66687e+06	6.48136e+06	1	413400	4	951	27	2
281506	279	513013	McLaren Park	602	Waitakere Ward	6	Waitakere City	02	Auckland Region	2.6548e+06	6.47651e+06	1	281506	9	1083	126	3
1592400	36	551800	New Plymouth Central	3301	New Plymouth City Ward	33	New Plymouth District	07	Taranaki Region	2.60296e+06	6.23804e+06	1	1592400	6	999	13	2
413600	63	514000	Freemans Bay	701	Western Bays Ward	7	Auckland City	02	Auckland Region	2.66661e+06	6.48155e+06	1	413600	7	1011	22	2
3034201	15	609302	Queenstown Hill	7001	Queenstown-Wakatipu Ward	70	Queenstown-Lakes District	14	Otago Region	2.16856e+06	5.56595e+06	1	3034201	4	948	5	2
543200	150	518101	Mt Eden North	703	Eden-Albert Ward	7	Auckland City	02	Auckland Region	2.66738e+06	6.47943e+06	1	543200	8	1044	68	3
1591900	15	551800	New Plymouth Central	3301	New Plymouth City Ward	33	New Plymouth District	07	Taranaki Region	2.60281e+06	6.23797e+06	1	1591900	6	999	5	2
1593000	60	551800	New Plymouth Central	3301	New Plymouth City Ward	33	New Plymouth District	07	Taranaki Region	2.60353e+06	6.23848e+06	1	1593000	6	981	21	2
1199100	132	536821	Omanu	2301	Mount Maunganui-Papamoa Ward	23	Tauranga City	04	Bay of Plenty Region	2.79347e+06	6.38851e+06	1	1199100	6	979	46	2
1199000	183	536821	Omanu	2301	Mount Maunganui-Papamoa Ward	23	Tauranga City	04	Bay of Plenty Region	2.7936e+06	6.38862e+06	1	1199000	4	952	64	2
413500	30	514000	Freemans Bay	701	Western Bays Ward	7	Auckland City	02	Auckland Region	2.66661e+06	6.48116e+06	1	413500	2	914	10	1
281200	84	513020	Opanuku	602	Waitakere Ward	6	Waitakere City	02	Auckland Region	2.65442e+06	6.4764e+06	1	281200	5	968	29	2
412301	153	514200	Newton	704	Hobson Ward	7	Auckland City	02	Auckland Region	2.66744e+06	6.48102e+06	1	412301	7	1016	54	2
3034300	51	609302	Queenstown Hill	7001	Queenstown-Wakatipu Ward	70	Queenstown-Lakes District	14	Otago Region	2.16844e+06	5.56574e+06	1	3034300	3	922	17	1
3034401	51	609302	Queenstown Hill	7001	Queenstown-Wakatipu Ward	70	Queenstown-Lakes District	14	Otago Region	2.16855e+06	5.56577e+06	1	3034401	3	922	17	1
1593300	3	551800	New Plymouth Central	3301	New Plymouth City Ward	33	New Plymouth District	07	Taranaki Region	2.60367e+06	6.23842e+06	1	1593300	6	981	1	2
413100	69	514000	Freemans Bay	701	Western Bays Ward	7	Auckland City	02	Auckland Region	2.66688e+06	6.48165e+06	1	413100	9	1122	31	3
413300	222	514000	Freemans Bay	701	Western Bays Ward	7	Auckland City	02	Auckland Region	2.66688e+06	6.4815e+06	1	413300	9	1122	100	3
281502	216	513013	McLaren Park	602	Waitakere Ward	6	Waitakere City	02	Auckland Region	2.65461e+06	6.47688e+06	1	281502	9	1099	97	3
281402	153	513013	McLaren Park	602	Waitakere Ward	6	Waitakere City	02	Auckland Region	2.65432e+06	6.47703e+06	1	281402	6	975	54	2
413000	363	514000	Freemans Bay	701	Western Bays Ward	7	Auckland City	02	Auckland Region	2.66673e+06	6.48163e+06	1	413000	8	1043	163	3
3033800	12	609302	Queenstown Hill	7001	Queenstown-Wakatipu Ward	70	Queenstown-Lakes District	14	Otago Region	2.16834e+06	5.56612e+06	1	3033800	7	1019	4	2
2122300	27	572900	Thorndon-Tinakori Road	4703	Lambton Ward	47	Wellington City	09	Wellington Region	2.65844e+06	5.99068e+06	1	2122300	4	947	9	2
1592500	3	551800	New Plymouth Central	3301	New Plymouth City Ward	33	New Plymouth District	07	Taranaki Region	2.60309e+06	6.23808e+06	1	1592500	6	999	1	2
1198800	189	536821	Omanu	2301	Mount Maunganui-Papamoa Ward	23	Tauranga City	04	Bay of Plenty Region	2.79333e+06	6.38887e+06	1	1198800	2	915	62	1
412800	57	514200	Newton	704	Hobson Ward	7	Auckland City	02	Auckland Region	2.66705e+06	6.48067e+06	1	412800	7	1007	20	2
412401	123	514200	Newton	704	Hobson Ward	7	Auckland City	02	Auckland Region	2.66733e+06	6.48067e+06	1	412401	3	921	41	1
412700	27	514200	Newton	704	Hobson Ward	7	Auckland City	02	Auckland Region	2.66716e+06	6.48062e+06	1	412700	6	984	9	2
544100	120	518101	Mt Eden North	703	Eden-Albert Ward	7	Auckland City	02	Auckland Region	2.66726e+06	6.47951e+06	1	544100	6	998	42	2
3034202	72	609302	Queenstown Hill	7001	Queenstown-Wakatipu Ward	70	Queenstown-Lakes District	14	Otago Region	2.16862e+06	5.566e+06	1	3034202	4	948	25	2
3033600	42	609301	Queenstown Bay	7001	Queenstown-Wakatipu Ward	70	Queenstown-Lakes District	14	Otago Region	2.16801e+06	5.56605e+06	1	3033600	7	1019	15	2
3033700	123	609302	Queenstown Hill	7001	Queenstown-Wakatipu Ward	70	Queenstown-Lakes District	14	Otago Region	2.16826e+06	5.56603e+06	1	3033700	7	1019	43	2
1592700	3	551800	New Plymouth Central	3301	New Plymouth City Ward	33	New Plymouth District	07	Taranaki Region	2.60313e+06	6.23801e+06	1	1592700	6	999	1	2
1198700	153	536821	Omanu	2301	Mount Maunganui-Papamoa Ward	23	Tauranga City	04	Bay of Plenty Region	2.79325e+06	6.38873e+06	1	1198700	4	944	54	2
1198601	150	536821	Omanu	2301	Mount Maunganui-Papamoa Ward	23	Tauranga City	04	Bay of Plenty Region	2.79315e+06	6.38844e+06	1	1198601	6	985	52	2
543500	102	518101	Mt Eden North	703	Eden-Albert Ward	7	Auckland City	02	Auckland Region	2.66721e+06	6.47983e+06	1	543500	4	950	36	2
412600	33	514200	Newton	704	Hobson Ward	7	Auckland City	02	Auckland Region	2.66719e+06	6.48073e+06	1	412600	6	984	12	2
1592000	3	551800	New Plymouth Central	3301	New Plymouth City Ward	33	New Plymouth District	07	Taranaki Region	2.60285e+06	6.2379e+06	1	1592000	6	999	1	2
1592900	3	551800	New Plymouth Central	3301	New Plymouth City Ward	33	New Plymouth District	07	Taranaki Region	2.6032e+06	6.23791e+06	1	1592900	6	999	1	2
1592800	3	551800	New Plymouth Central	3301	New Plymouth City Ward	33	New Plymouth District	07	Taranaki Region	2.60306e+06	6.23786e+06	1	1592800	6	999	1	2
281510	162	513013	McLaren Park	602	Waitakere Ward	6	Waitakere City	02	Auckland Region	2.65463e+06	6.47668e+06	1	281510	9	1107	73	3
1198602	195	536821	Omanu	2301	Mount Maunganui-Papamoa Ward	23	Tauranga City	04	Bay of Plenty Region	2.79337e+06	6.38835e+06	1	1198602	3	919	64	1
1199201	195	536821	Omanu	2301	Mount Maunganui-Papamoa Ward	23	Tauranga City	04	Bay of Plenty Region	2.79379e+06	6.38835e+06	1	1199201	5	965	68	2
2775701	105	599200	Glenwood	6404	Timaru Ward	64	Timaru District	13	Canterbury Region	2.36711e+06	5.64483e+06	1	2775701	4	953	37	2
2775300	132	599200	Glenwood	6404	Timaru Ward	64	Timaru District	13	Canterbury Region	2.36751e+06	5.64491e+06	1	2775300	3	932	44	1
2774905	165	599300	Gleniti	6404	Timaru Ward	64	Timaru District	13	Canterbury Region	2.36676e+06	5.64484e+06	1	2774905	4	951	58	2
2775600	144	599200	Glenwood	6404	Timaru Ward	64	Timaru District	13	Canterbury Region	2.36713e+06	5.64495e+06	1	2775600	2	905	48	1
416100	69	514000	Freemans Bay	701	Western Bays Ward	7	Auckland City	02	Auckland Region	2.66629e+06	6.48207e+06	1	416100	7	1000	24	2
415600	147	514000	Freemans Bay	701	Western Bays Ward	7	Auckland City	02	Auckland Region	2.66605e+06	6.48199e+06	1	415600	5	966	51	2
1595200	105	552002	Marsland Hill	3301	New Plymouth City Ward	33	New Plymouth District	07	Taranaki Region	2.60348e+06	6.23771e+06	1	1595200	6	988	37	2
2119700	27	572900	Thorndon-Tinakori Road	4703	Lambton Ward	47	Wellington City	09	Wellington Region	2.65878e+06	5.99074e+06	1	2119700	5	967	9	2
1596500	123	552001	Mount Bryan	3301	New Plymouth City Ward	33	New Plymouth District	07	Taranaki Region	2.60433e+06	6.23828e+06	1	1596500	7	1013	43	2
417000	156	514000	Freemans Bay	701	Western Bays Ward	7	Auckland City	02	Auckland Region	2.6665e+06	6.48191e+06	1	417000	2	901	51	1
1202800	6	536810	Mt Maunganui North	2301	Mount Maunganui-Papamoa Ward	23	Tauranga City	04	Bay of Plenty Region	2.79125e+06	6.39052e+06	1	1202800	10	1181	3	3
1202901	15	536810	Mt Maunganui North	2301	Mount Maunganui-Papamoa Ward	23	Tauranga City	04	Bay of Plenty Region	2.79138e+06	6.39039e+06	1	1202901	10	1181	7	3
1594000	24	551800	New Plymouth Central	3301	New Plymouth City Ward	33	New Plymouth District	07	Taranaki Region	2.60361e+06	6.23818e+06	1	1594000	7	1013	8	2
1201605	147	536831	Arataki	2301	Mount Maunganui-Papamoa Ward	23	Tauranga City	04	Bay of Plenty Region	2.79455e+06	6.38655e+06	1	1201605	10	1151	66	3
2118800	6	572900	Thorndon-Tinakori Road	4703	Lambton Ward	47	Wellington City	09	Wellington Region	2.65909e+06	5.99101e+06	1	2118800	3	931	2	1
2119000	33	572900	Thorndon-Tinakori Road	4703	Lambton Ward	47	Wellington City	09	Wellington Region	2.65909e+06	5.99096e+06	1	2119000	3	931	11	1
414700	69	514000	Freemans Bay	701	Western Bays Ward	7	Auckland City	02	Auckland Region	2.66626e+06	6.48184e+06	1	414700	2	904	23	1
1200800	153	536831	Arataki	2301	Mount Maunganui-Papamoa Ward	23	Tauranga City	04	Bay of Plenty Region	2.79387e+06	6.38735e+06	1	1200800	10	1323	69	3
1200300	162	536821	Omanu	2301	Mount Maunganui-Papamoa Ward	23	Tauranga City	04	Bay of Plenty Region	2.7937e+06	6.3878e+06	1	1200300	3	924	53	1
414900	60	514000	Freemans Bay	701	Western Bays Ward	7	Auckland City	02	Auckland Region	2.66613e+06	6.48166e+06	1	414900	2	904	20	1
413700	135	514000	Freemans Bay	701	Western Bays Ward	7	Auckland City	02	Auckland Region	2.6665e+06	6.48139e+06	1	413700	2	916	45	1
414500	30	514000	Freemans Bay	701	Western Bays Ward	7	Auckland City	02	Auckland Region	2.66627e+06	6.48127e+06	1	414500	3	924	10	1
2774300	120	598700	Washdyke	6404	Timaru Ward	64	Timaru District	13	Canterbury Region	2.36957e+06	5.64701e+06	1	2774300	5	971	42	2
415000	60	514000	Freemans Bay	701	Western Bays Ward	7	Auckland City	02	Auckland Region	2.66616e+06	6.48158e+06	1	415000	1	895	20	1
1463700	114	545852	Pakipaki	3009	Poukawa Ward	30	Hastings District	06	Hawke's Bay Region	2.83504e+06	6.16129e+06	1	1463700	8	1031	51	3
1593900	6	551800	New Plymouth Central	3301	New Plymouth City Ward	33	New Plymouth District	07	Taranaki Region	2.60332e+06	6.23808e+06	1	1593900	7	1013	2	2
2118300	201	572900	Thorndon-Tinakori Road	4703	Lambton Ward	47	Wellington City	09	Wellington Region	2.6593e+06	5.99086e+06	1	2118300	4	940	70	2
1201000	147	536831	Arataki	2301	Mount Maunganui-Papamoa Ward	23	Tauranga City	04	Bay of Plenty Region	2.79446e+06	6.38719e+06	1	1201000	9	1088	66	3
413800	45	514000	Freemans Bay	701	Western Bays Ward	7	Auckland City	02	Auckland Region	2.66665e+06	6.48107e+06	1	413800	7	1011	16	2
1594600	39	551800	New Plymouth Central	3301	New Plymouth City Ward	33	New Plymouth District	07	Taranaki Region	2.60363e+06	6.23798e+06	1	1594600	6	981	14	2
1593500	9	551800	New Plymouth Central	3301	New Plymouth City Ward	33	New Plymouth District	07	Taranaki Region	2.60394e+06	6.23853e+06	1	1593500	6	981	3	2
1201300	75	536831	Arataki	2301	Mount Maunganui-Papamoa Ward	23	Tauranga City	04	Bay of Plenty Region	2.79438e+06	6.38694e+06	1	1201300	10	1181	34	3
3036400	39	608800	Wanaka	7002	Wanaka Ward	70	Queenstown-Lakes District	14	Otago Region	2.20352e+06	5.60482e+06	1	3036400	4	947	14	2
3036300	144	608800	Wanaka	7002	Wanaka Ward	70	Queenstown-Lakes District	14	Otago Region	2.20394e+06	5.60493e+06	1	3036300	4	947	50	2
3036100	93	608800	Wanaka	7002	Wanaka Ward	70	Queenstown-Lakes District	14	Otago Region	2.20403e+06	5.60523e+06	1	3036100	6	988	33	2
2774606	138	599300	Gleniti	6404	Timaru Ward	64	Timaru District	13	Canterbury Region	2.36577e+06	5.64575e+06	1	2774606	3	920	46	1
2774607	135	599300	Gleniti	6404	Timaru Ward	64	Timaru District	13	Canterbury Region	2.36602e+06	5.64566e+06	1	2774607	3	930	45	1
413900	120	514000	Freemans Bay	701	Western Bays Ward	7	Auckland City	02	Auckland Region	2.66681e+06	6.48114e+06	1	413900	2	913	40	1
1200401	207	536831	Arataki	2301	Mount Maunganui-Papamoa Ward	23	Tauranga City	04	Bay of Plenty Region	2.79411e+06	6.3875e+06	1	1200401	6	976	72	2
1200600	141	536821	Omanu	2301	Mount Maunganui-Papamoa Ward	23	Tauranga City	04	Bay of Plenty Region	2.79355e+06	6.38763e+06	1	1200600	9	1109	63	3
1200700	156	536821	Omanu	2301	Mount Maunganui-Papamoa Ward	23	Tauranga City	04	Bay of Plenty Region	2.79374e+06	6.38759e+06	1	1200700	7	1028	55	2
414200	141	514000	Freemans Bay	701	Western Bays Ward	7	Auckland City	02	Auckland Region	2.66644e+06	6.48152e+06	1	414200	5	954	49	2
221904	54	513430	Hobsonville	601	Massey Ward	6	Waitakere City	02	Auckland Region	2.65903e+06	6.48902e+06	1	221904	3	927	18	1
414300	63	514000	Freemans Bay	701	Western Bays Ward	7	Auckland City	02	Auckland Region	2.66639e+06	6.48138e+06	1	414300	5	954	22	2
1725900	138	556200	Gonville South	3702	Urban Ward	37	Wanganui District	08	Manawatu-Wanganui Region	2.68375e+06	6.1379e+06	1	1725900	8	1052	62	3
2773700	240	598700	Washdyke	6404	Timaru Ward	64	Timaru District	13	Canterbury Region	2.36952e+06	5.64937e+06	1	2773700	7	1028	84	2
2773800	9	598700	Washdyke	6404	Timaru Ward	64	Timaru District	13	Canterbury Region	2.36977e+06	5.64903e+06	1	2773800	5	964	3	2
1200200	171	536821	Omanu	2301	Mount Maunganui-Papamoa Ward	23	Tauranga City	04	Bay of Plenty Region	2.79337e+06	6.38787e+06	1	1200200	10	1158	77	3
2774000	48	598700	Washdyke	6404	Timaru Ward	64	Timaru District	13	Canterbury Region	2.36973e+06	5.64808e+06	1	2774000	5	964	17	2
2773900	24	598700	Washdyke	6404	Timaru Ward	64	Timaru District	13	Canterbury Region	2.36946e+06	5.64867e+06	1	2773900	5	964	8	2
2774100	6	598700	Washdyke	6404	Timaru Ward	64	Timaru District	13	Canterbury Region	2.36995e+06	5.64837e+06	1	2774100	5	964	2	2
2774400	3	598700	Washdyke	6404	Timaru Ward	64	Timaru District	13	Canterbury Region	2.37005e+06	5.64701e+06	1	2774400	5	964	1	2
2774202	237	598700	Washdyke	6404	Timaru Ward	64	Timaru District	13	Canterbury Region	2.36985e+06	5.64725e+06	1	2774202	5	964	83	2
2122500	147	572900	Thorndon-Tinakori Road	4703	Lambton Ward	47	Wellington City	09	Wellington Region	2.65901e+06	5.99064e+06	1	2122500	6	985	51	2
1594900	63	552002	Marsland Hill	3301	New Plymouth City Ward	33	New Plymouth District	07	Taranaki Region	2.60402e+06	6.23812e+06	1	1594900	9	1077	28	3
1201606	144	536831	Arataki	2301	Mount Maunganui-Papamoa Ward	23	Tauranga City	04	Bay of Plenty Region	2.79466e+06	6.38654e+06	1	1201606	8	1045	65	3
414800	90	514000	Freemans Bay	701	Western Bays Ward	7	Auckland City	02	Auckland Region	2.66629e+06	6.48176e+06	1	414800	2	914	30	1
414400	60	514000	Freemans Bay	701	Western Bays Ward	7	Auckland City	02	Auckland Region	2.66633e+06	6.48131e+06	1	414400	3	924	20	1
415100	192	514000	Freemans Bay	701	Western Bays Ward	7	Auckland City	02	Auckland Region	2.66634e+06	6.48169e+06	1	415100	8	1032	86	3
414600	54	514000	Freemans Bay	701	Western Bays Ward	7	Auckland City	02	Auckland Region	2.66613e+06	6.48182e+06	1	414600	1	895	18	1
414100	129	514000	Freemans Bay	701	Western Bays Ward	7	Auckland City	02	Auckland Region	2.66633e+06	6.48158e+06	1	414100	3	931	43	1
1594800	33	552002	Marsland Hill	3301	New Plymouth City Ward	33	New Plymouth District	07	Taranaki Region	2.60379e+06	6.23804e+06	1	1594800	9	1077	15	3
1200900	204	536831	Arataki	2301	Mount Maunganui-Papamoa Ward	23	Tauranga City	04	Bay of Plenty Region	2.79429e+06	6.38706e+06	1	1200900	8	1054	92	3
3035800	66	608800	Wanaka	7002	Wanaka Ward	70	Queenstown-Lakes District	14	Otago Region	2.20396e+06	5.60561e+06	1	3035800	4	941	23	2
3036000	33	608800	Wanaka	7002	Wanaka Ward	70	Queenstown-Lakes District	14	Otago Region	2.20381e+06	5.6053e+06	1	3036000	6	988	12	2
415300	27	514000	Freemans Bay	701	Western Bays Ward	7	Auckland City	02	Auckland Region	2.66656e+06	6.48176e+06	1	415300	2	914	9	1
415200	21	514000	Freemans Bay	701	Western Bays Ward	7	Auckland City	02	Auckland Region	2.66649e+06	6.4817e+06	1	415200	2	900	7	1
414000	114	514000	Freemans Bay	701	Western Bays Ward	7	Auckland City	02	Auckland Region	2.66618e+06	6.48145e+06	1	414000	3	924	38	1
1594500	15	551800	New Plymouth Central	3301	New Plymouth City Ward	33	New Plymouth District	07	Taranaki Region	2.60342e+06	6.2379e+06	1	1594500	6	981	5	2
3036500	135	608800	Wanaka	7002	Wanaka Ward	70	Queenstown-Lakes District	14	Otago Region	2.20367e+06	5.60459e+06	1	3036500	4	936	47	2
3036604	48	608800	Wanaka	7002	Wanaka Ward	70	Queenstown-Lakes District	14	Otago Region	2.20331e+06	5.60466e+06	1	3036604	4	936	17	2
2121300	3	572900	Thorndon-Tinakori Road	4703	Lambton Ward	47	Wellington City	09	Wellington Region	2.65888e+06	5.99074e+06	1	2121300	7	1009	1	2
1598000	9	552100	Fitzroy	3301	New Plymouth City Ward	33	New Plymouth District	07	Taranaki Region	2.60482e+06	6.23829e+06	1	1598000	4	944	3	2
416600	108	514000	Freemans Bay	701	Western Bays Ward	7	Auckland City	02	Auckland Region	2.66652e+06	6.48214e+06	1	416600	2	903	36	1
2774801	165	599300	Gleniti	6404	Timaru Ward	64	Timaru District	13	Canterbury Region	2.36611e+06	5.64539e+06	1	2774801	2	905	54	1
415900	12	514000	Freemans Bay	701	Western Bays Ward	7	Auckland City	02	Auckland Region	2.66627e+06	6.48217e+06	1	415900	3	920	4	1
416200	36	514000	Freemans Bay	701	Western Bays Ward	7	Auckland City	02	Auckland Region	2.66618e+06	6.4821e+06	1	416200	8	1060	16	3
415800	60	514000	Freemans Bay	701	Western Bays Ward	7	Auckland City	02	Auckland Region	2.66617e+06	6.4822e+06	1	415800	3	920	20	1
1595500	141	552002	Marsland Hill	3301	New Plymouth City Ward	33	New Plymouth District	07	Taranaki Region	2.6038e+06	6.23762e+06	1	1595500	1	886	47	1
1596600	96	552001	Mount Bryan	3301	New Plymouth City Ward	33	New Plymouth District	07	Taranaki Region	2.60437e+06	6.23813e+06	1	1596600	5	967	34	2
1595300	81	552002	Marsland Hill	3301	New Plymouth City Ward	33	New Plymouth District	07	Taranaki Region	2.60323e+06	6.23764e+06	1	1595300	8	1042	36	3
2119400	33	572900	Thorndon-Tinakori Road	4703	Lambton Ward	47	Wellington City	09	Wellington Region	2.65883e+06	5.99098e+06	1	2119400	6	977	12	2
1202902	63	536810	Mt Maunganui North	2301	Mount Maunganui-Papamoa Ward	23	Tauranga City	04	Bay of Plenty Region	2.79154e+06	6.39034e+06	1	1202902	10	1181	28	3
415400	57	514000	Freemans Bay	701	Western Bays Ward	7	Auckland City	02	Auckland Region	2.66602e+06	6.48225e+06	1	415400	2	900	19	1
1726300	81	556200	Gonville South	3702	Urban Ward	37	Wanganui District	08	Manawatu-Wanganui Region	2.68411e+06	6.13838e+06	1	1726300	6	994	28	2
2775500	249	599200	Glenwood	6404	Timaru Ward	64	Timaru District	13	Canterbury Region	2.36708e+06	5.64515e+06	1	2775500	2	900	82	1
2774803	90	599300	Gleniti	6404	Timaru Ward	64	Timaru District	13	Canterbury Region	2.36651e+06	5.64528e+06	1	2774803	4	940	31	2
2774804	99	599300	Gleniti	6404	Timaru Ward	64	Timaru District	13	Canterbury Region	2.36675e+06	5.64526e+06	1	2774804	4	940	35	2
1595000	162	552002	Marsland Hill	3301	New Plymouth City Ward	33	New Plymouth District	07	Taranaki Region	2.60403e+06	6.23798e+06	1	1595000	8	1048	73	3
1596000	150	552001	Mount Bryan	3301	New Plymouth City Ward	33	New Plymouth District	07	Taranaki Region	2.60412e+06	6.23866e+06	1	1596000	5	957	52	2
1595800	150	552001	Mount Bryan	3301	New Plymouth City Ward	33	New Plymouth District	07	Taranaki Region	2.60382e+06	6.23868e+06	1	1595800	7	1007	52	2
416900	102	514000	Freemans Bay	701	Western Bays Ward	7	Auckland City	02	Auckland Region	2.66643e+06	6.482e+06	1	416900	4	942	36	2
1726500	54	556200	Gonville South	3702	Urban Ward	37	Wanganui District	08	Manawatu-Wanganui Region	2.68421e+06	6.13812e+06	1	1726500	7	1010	19	2
1727400	36	557000	Spriggens Park	3702	Urban Ward	37	Wanganui District	08	Manawatu-Wanganui Region	2.68456e+06	6.13825e+06	1	1727400	9	1131	16	3
2774805	78	599300	Gleniti	6404	Timaru Ward	64	Timaru District	13	Canterbury Region	2.36647e+06	5.64517e+06	1	2774805	4	940	27	2
2775100	84	599200	Glenwood	6404	Timaru Ward	64	Timaru District	13	Canterbury Region	2.36744e+06	5.64511e+06	1	2775100	9	1100	38	3
416300	93	514000	Freemans Bay	701	Western Bays Ward	7	Auckland City	02	Auckland Region	2.66619e+06	6.482e+06	1	416300	8	1060	42	3
3038211	177	609301	Queenstown Bay	7001	Queenstown-Wakatipu Ward	70	Queenstown-Lakes District	14	Otago Region	2.16812e+06	5.56681e+06	1	3038211	6	980	62	2
1595100	108	552002	Marsland Hill	3301	New Plymouth City Ward	33	New Plymouth District	07	Taranaki Region	2.60375e+06	6.23791e+06	1	1595100	7	1021	38	2
2120000	78	572900	Thorndon-Tinakori Road	4703	Lambton Ward	47	Wellington City	09	Wellington Region	2.65863e+06	5.99076e+06	1	2120000	5	967	27	2
1596300	123	552001	Mount Bryan	3301	New Plymouth City Ward	33	New Plymouth District	07	Taranaki Region	2.60449e+06	6.23846e+06	1	1596300	5	962	43	2
1596100	39	552001	Mount Bryan	3301	New Plymouth City Ward	33	New Plymouth District	07	Taranaki Region	2.60419e+06	6.23851e+06	1	1596100	5	967	14	2
416700	66	514000	Freemans Bay	701	Western Bays Ward	7	Auckland City	02	Auckland Region	2.66664e+06	6.4821e+06	1	416700	2	900	22	1
3038226	3	609301	Queenstown Bay	7001	Queenstown-Wakatipu Ward	70	Queenstown-Lakes District	14	Otago Region	2.16784e+06	5.56647e+06	1	3038226	7	1010	1	2
1595400	117	552002	Marsland Hill	3301	New Plymouth City Ward	33	New Plymouth District	07	Taranaki Region	2.6038e+06	6.23779e+06	1	1595400	4	938	41	2
2120100	45	572900	Thorndon-Tinakori Road	4703	Lambton Ward	47	Wellington City	09	Wellington Region	2.65846e+06	5.99074e+06	1	2120100	5	967	16	2
2119900	15	572900	Thorndon-Tinakori Road	4703	Lambton Ward	47	Wellington City	09	Wellington Region	2.65868e+06	5.99072e+06	1	2119900	5	967	5	2
1596400	69	552001	Mount Bryan	3301	New Plymouth City Ward	33	New Plymouth District	07	Taranaki Region	2.60425e+06	6.23842e+06	1	1596400	7	1009	24	2
1202700	6	536810	Mt Maunganui North	2301	Mount Maunganui-Papamoa Ward	23	Tauranga City	04	Bay of Plenty Region	2.79122e+06	6.39063e+06	1	1202700	10	1181	3	3
1726700	48	556200	Gonville South	3702	Urban Ward	37	Wanganui District	08	Manawatu-Wanganui Region	2.68444e+06	6.13811e+06	1	1726700	6	994	17	2
1726200	69	556200	Gonville South	3702	Urban Ward	37	Wanganui District	08	Manawatu-Wanganui Region	2.68413e+06	6.13789e+06	1	1726200	9	1101	31	3
416000	165	514000	Freemans Bay	701	Western Bays Ward	7	Auckland City	02	Auckland Region	2.66637e+06	6.48216e+06	1	416000	7	1000	58	2
2775800	120	599200	Glenwood	6404	Timaru Ward	64	Timaru District	13	Canterbury Region	2.36744e+06	5.64473e+06	1	2775800	3	920	40	1
1727300	3	557000	Spriggens Park	3702	Urban Ward	37	Wanganui District	08	Manawatu-Wanganui Region	2.68499e+06	6.13854e+06	1	1727300	9	1075	1	3
1726900	123	557000	Spriggens Park	3702	Urban Ward	37	Wanganui District	08	Manawatu-Wanganui Region	2.68435e+06	6.13852e+06	1	1726900	9	1074	55	3
415700	72	514000	Freemans Bay	701	Western Bays Ward	7	Auckland City	02	Auckland Region	2.66605e+06	6.48178e+06	1	415700	2	907	24	1
1465300	24	545762	Longlands South	3003	Heretaunga Ward	30	Hastings District	06	Hawke's Bay Region	2.83942e+06	6.16248e+06	1	1465300	2	917	8	1
1726100	75	556200	Gonville South	3702	Urban Ward	37	Wanganui District	08	Manawatu-Wanganui Region	2.68383e+06	6.13766e+06	1	1726100	7	1022	26	2
1727100	30	557000	Spriggens Park	3702	Urban Ward	37	Wanganui District	08	Manawatu-Wanganui Region	2.68459e+06	6.13844e+06	1	1727100	9	1131	14	3
2775202	123	599200	Glenwood	6404	Timaru Ward	64	Timaru District	13	Canterbury Region	2.36756e+06	5.6453e+06	1	2775202	8	1064	55	3
2775402	204	599200	Glenwood	6404	Timaru Ward	64	Timaru District	13	Canterbury Region	2.36721e+06	5.64534e+06	1	2775402	6	977	71	2
1727000	87	557000	Spriggens Park	3702	Urban Ward	37	Wanganui District	08	Manawatu-Wanganui Region	2.68468e+06	6.13882e+06	1	1727000	8	1071	39	3
416500	48	514000	Freemans Bay	701	Western Bays Ward	7	Auckland City	02	Auckland Region	2.6664e+06	6.48204e+06	1	416500	2	916	16	1
964900	63	527503	Cambridge Central	1702	Cambridge Ward	17	Waipa District	03	Waikato Region	2.7272e+06	6.36466e+06	1	964900	6	985	22	2
1595600	132	552002	Marsland Hill	3301	New Plymouth City Ward	33	New Plymouth District	07	Taranaki Region	2.60348e+06	6.23757e+06	1	1595600	4	945	46	2
2119600	36	572900	Thorndon-Tinakori Road	4703	Lambton Ward	47	Wellington City	09	Wellington Region	2.65889e+06	5.99096e+06	1	2119600	6	977	13	2
416800	48	514000	Freemans Bay	701	Western Bays Ward	7	Auckland City	02	Auckland Region	2.66669e+06	6.48198e+06	1	416800	2	900	16	1
1203000	141	536810	Mt Maunganui North	2301	Mount Maunganui-Papamoa Ward	23	Tauranga City	04	Bay of Plenty Region	2.7915e+06	6.39012e+06	1	1203000	7	1024	49	2
415500	78	514000	Freemans Bay	701	Western Bays Ward	7	Auckland City	02	Auckland Region	2.66601e+06	6.48216e+06	1	415500	3	920	26	1
417100	51	514000	Freemans Bay	701	Western Bays Ward	7	Auckland City	02	Auckland Region	2.66661e+06	6.48188e+06	1	417100	6	975	18	2
1596200	12	552001	Mount Bryan	3301	New Plymouth City Ward	33	New Plymouth District	07	Taranaki Region	2.60446e+06	6.23857e+06	1	1596200	5	967	4	2
1595900	66	552001	Mount Bryan	3301	New Plymouth City Ward	33	New Plymouth District	07	Taranaki Region	2.60385e+06	6.2386e+06	1	1595900	5	958	23	2
1595700	57	552001	Mount Bryan	3301	New Plymouth City Ward	33	New Plymouth District	07	Taranaki Region	2.60355e+06	6.23858e+06	1	1595700	7	1007	20	2
1203204	108	536810	Mt Maunganui North	2301	Mount Maunganui-Papamoa Ward	23	Tauranga City	04	Bay of Plenty Region	2.79161e+06	6.3899e+06	1	1203204	8	1050	49	3
1726600	138	556200	Gonville South	3702	Urban Ward	37	Wanganui District	08	Manawatu-Wanganui Region	2.68432e+06	6.13807e+06	1	1726600	8	1030	62	3
1726400	126	556200	Gonville South	3702	Urban Ward	37	Wanganui District	08	Manawatu-Wanganui Region	2.68386e+06	6.13802e+06	1	1726400	7	1010	44	2
2775201	102	599200	Glenwood	6404	Timaru Ward	64	Timaru District	13	Canterbury Region	2.36758e+06	5.64503e+06	1	2775201	8	1064	46	3
2774903	90	599300	Gleniti	6404	Timaru Ward	64	Timaru District	13	Canterbury Region	2.36638e+06	5.64503e+06	1	2774903	4	951	31	2
2774904	57	599300	Gleniti	6404	Timaru Ward	64	Timaru District	13	Canterbury Region	2.36665e+06	5.64504e+06	1	2774904	4	951	20	2
2774902	126	599300	Gleniti	6404	Timaru Ward	64	Timaru District	13	Canterbury Region	2.3668e+06	5.64498e+06	1	2774902	5	958	44	2
416400	78	514000	Freemans Bay	701	Western Bays Ward	7	Auckland City	02	Auckland Region	2.66625e+06	6.48195e+06	1	416400	2	916	26	1
3038225	54	609301	Queenstown Bay	7001	Queenstown-Wakatipu Ward	70	Queenstown-Lakes District	14	Otago Region	2.16799e+06	5.56672e+06	1	3038225	7	1010	19	2
1468400	93	545762	Longlands South	3003	Heretaunga Ward	30	Hastings District	06	Hawke's Bay Region	2.83919e+06	6.1635e+06	1	1468400	2	904	31	1
1598102	45	552100	Fitzroy	3301	New Plymouth City Ward	33	New Plymouth District	07	Taranaki Region	2.6051e+06	6.23826e+06	1	1598102	5	961	16	2
1597000	75	552100	Fitzroy	3301	New Plymouth City Ward	33	New Plymouth District	07	Taranaki Region	2.60475e+06	6.23881e+06	1	1597000	3	931	25	1
1204401	12	536821	Omanu	2301	Mount Maunganui-Papamoa Ward	23	Tauranga City	04	Bay of Plenty Region	2.79308e+06	6.38768e+06	1	1204401	8	1035	5	3
1203600	24	536821	Omanu	2301	Mount Maunganui-Papamoa Ward	23	Tauranga City	04	Bay of Plenty Region	2.79213e+06	6.38895e+06	1	1203600	7	1024	8	2
1466502	231	548831	Te Mata	3008	Havelock North Ward	30	Hastings District	06	Hawke's Bay Region	2.84476e+06	6.16344e+06	1	1466502	1	896	76	1
1466413	78	548831	Te Mata	3008	Havelock North Ward	30	Hastings District	06	Hawke's Bay Region	2.84442e+06	6.1635e+06	1	1466413	1	881	26	1
417300	33	514000	Freemans Bay	701	Western Bays Ward	7	Auckland City	02	Auckland Region	2.66674e+06	6.48177e+06	1	417300	6	975	12	2
1597300	132	552100	Fitzroy	3301	New Plymouth City Ward	33	New Plymouth District	07	Taranaki Region	2.60516e+06	6.2387e+06	1	1597300	7	1026	46	2
1597100	45	552100	Fitzroy	3301	New Plymouth City Ward	33	New Plymouth District	07	Taranaki Region	2.60458e+06	6.23869e+06	1	1597100	3	931	15	1
1466707	162	548833	Te Mata Hills	3008	Havelock North Ward	30	Hastings District	06	Hawke's Bay Region	2.84456e+06	6.16308e+06	1	1466707	1	897	53	1
2121200	144	572900	Thorndon-Tinakori Road	4703	Lambton Ward	47	Wellington City	09	Wellington Region	2.65902e+06	5.99082e+06	1	2121200	7	1009	50	2
1597500	36	552100	Fitzroy	3301	New Plymouth City Ward	33	New Plymouth District	07	Taranaki Region	2.60513e+06	6.23855e+06	1	1597500	4	941	13	2
1597700	66	552100	Fitzroy	3301	New Plymouth City Ward	33	New Plymouth District	07	Taranaki Region	2.6047e+06	6.2385e+06	1	1597700	5	958	23	2
1203900	3	536821	Omanu	2301	Mount Maunganui-Papamoa Ward	23	Tauranga City	04	Bay of Plenty Region	2.79189e+06	6.38809e+06	1	1203900	8	1035	1	3
1204000	12	536821	Omanu	2301	Mount Maunganui-Papamoa Ward	23	Tauranga City	04	Bay of Plenty Region	2.79253e+06	6.38825e+06	1	1204000	8	1035	5	3
1466706	204	548833	Te Mata Hills	3008	Havelock North Ward	30	Hastings District	06	Hawke's Bay Region	2.84454e+06	6.16286e+06	1	1466706	1	860	67	1
1466705	195	548832	Havelock North Central	3008	Havelock North Ward	30	Hastings District	06	Hawke's Bay Region	2.84427e+06	6.16291e+06	1	1466705	2	910	64	1
1466600	93	545750	Brookvale	3004	Clive Ward	30	Hastings District	06	Hawke's Bay Region	2.84597e+06	6.16456e+06	1	1466600	5	957	33	2
417600	153	515500	Arch Hill	701	Western Bays Ward	7	Auckland City	02	Auckland Region	2.6667e+06	6.4808e+06	1	417600	5	967	54	2
1598101	126	552100	Fitzroy	3301	New Plymouth City Ward	33	New Plymouth District	07	Taranaki Region	2.605e+06	6.23836e+06	1	1598101	5	961	44	2
1597900	36	552100	Fitzroy	3301	New Plymouth City Ward	33	New Plymouth District	07	Taranaki Region	2.60514e+06	6.2384e+06	1	1597900	4	944	13	2
417800	15	515500	Arch Hill	701	Western Bays Ward	7	Auckland City	02	Auckland Region	2.66645e+06	6.48065e+06	1	417800	6	979	5	2
1466501	69	545750	Brookvale	3004	Clive Ward	30	Hastings District	06	Hawke's Bay Region	2.84528e+06	6.16411e+06	1	1466501	5	957	24	2
2122400	63	572900	Thorndon-Tinakori Road	4703	Lambton Ward	47	Wellington City	09	Wellington Region	2.65862e+06	5.99066e+06	1	2122400	4	947	22	2
1597200	135	552100	Fitzroy	3301	New Plymouth City Ward	33	New Plymouth District	07	Taranaki Region	2.60505e+06	6.23888e+06	1	1597200	5	970	47	2
1204403	81	536831	Arataki	2301	Mount Maunganui-Papamoa Ward	23	Tauranga City	04	Bay of Plenty Region	2.79424e+06	6.38648e+06	1	1204403	8	1035	36	3
1204300	54	536821	Omanu	2301	Mount Maunganui-Papamoa Ward	23	Tauranga City	04	Bay of Plenty Region	2.79218e+06	6.38771e+06	1	1204300	8	1035	24	3
418000	57	515500	Arch Hill	701	Western Bays Ward	7	Auckland City	02	Auckland Region	2.66643e+06	6.48052e+06	1	418000	6	979	20	2
1466414	60	548831	Te Mata	3008	Havelock North Ward	30	Hastings District	06	Hawke's Bay Region	2.84466e+06	6.16342e+06	1	1466414	1	886	20	1
2121700	81	572900	Thorndon-Tinakori Road	4703	Lambton Ward	47	Wellington City	09	Wellington Region	2.65832e+06	5.99056e+06	1	2121700	4	943	28	2
2121100	30	572900	Thorndon-Tinakori Road	4703	Lambton Ward	47	Wellington City	09	Wellington Region	2.65885e+06	5.99086e+06	1	2121100	7	1009	10	2
1597800	57	552100	Fitzroy	3301	New Plymouth City Ward	33	New Plymouth District	07	Taranaki Region	2.60479e+06	6.23853e+06	1	1597800	5	958	20	2
1597400	123	552100	Fitzroy	3301	New Plymouth City Ward	33	New Plymouth District	07	Taranaki Region	2.60496e+06	6.23864e+06	1	1597400	4	941	43	2
1597600	30	552100	Fitzroy	3301	New Plymouth City Ward	33	New Plymouth District	07	Taranaki Region	2.60525e+06	6.23858e+06	1	1597600	4	941	10	2
2777500	24	598313	Levels	6404	Timaru Ward	64	Timaru District	13	Canterbury Region	2.36681e+06	5.63496e+06	1	2777500	2	906	8	1
417500	30	515500	Arch Hill	701	Western Bays Ward	7	Auckland City	02	Auckland Region	2.66665e+06	6.4808e+06	1	417500	6	979	10	2
1466709	15	548833	Te Mata Hills	3009	Poukawa Ward	30	Hastings District	06	Hawke's Bay Region	2.84515e+06	6.16275e+06	1	1466709	1	884	5	1
2121800	48	572900	Thorndon-Tinakori Road	4703	Lambton Ward	47	Wellington City	09	Wellington Region	2.6583e+06	5.9905e+06	1	2121800	4	943	17	2
417900	15	515500	Arch Hill	701	Western Bays Ward	7	Auckland City	02	Auckland Region	2.66648e+06	6.48055e+06	1	417900	6	979	5	2
1204100	6	536821	Omanu	2301	Mount Maunganui-Papamoa Ward	23	Tauranga City	04	Bay of Plenty Region	2.79293e+06	6.3881e+06	1	1204100	8	1035	3	3
420100	78	515600	Eden Terrace	704	Hobson Ward	7	Auckland City	02	Auckland Region	2.66678e+06	6.48049e+06	1	420100	9	1092	35	3
2780800	117	599000	Maori Park	6404	Timaru Ward	64	Timaru District	13	Canterbury Region	2.36992e+06	5.64492e+06	1	2780800	5	973	41	2
2780900	69	599000	Maori Park	6404	Timaru Ward	64	Timaru District	13	Canterbury Region	2.37013e+06	5.64489e+06	1	2780900	8	1056	31	3
421500	66	515201	Herne Bay	701	Western Bays Ward	7	Auckland City	02	Auckland Region	2.66443e+06	6.48255e+06	1	421500	1	886	22	1
1469100	33	545761	Irongate	3003	Heretaunga Ward	30	Hastings District	06	Hawke's Bay Region	2.83833e+06	6.16527e+06	1	1469100	4	943	12	2
1469301	3	545761	Irongate	3005	Hastings Ward	30	Hastings District	06	Hawke's Bay Region	2.83854e+06	6.16575e+06	1	1469301	3	921	1	1
1468902	36	545761	Irongate	3003	Heretaunga Ward	30	Hastings District	06	Hawke's Bay Region	2.83701e+06	6.16555e+06	1	1468902	4	938	13	2
1601200	114	552200	Welbourn	3301	New Plymouth City Ward	33	New Plymouth District	07	Taranaki Region	2.60425e+06	6.23666e+06	1	1601200	8	1044	51	3
420200	162	515600	Eden Terrace	704	Hobson Ward	7	Auckland City	02	Auckland Region	2.66696e+06	6.48051e+06	1	420200	3	932	53	1
1600700	69	552200	Welbourn	3301	New Plymouth City Ward	33	New Plymouth District	07	Taranaki Region	2.60415e+06	6.23749e+06	1	1600700	9	1089	31	3
419900	126	515600	Eden Terrace	704	Hobson Ward	7	Auckland City	02	Auckland Region	2.66673e+06	6.48035e+06	1	419900	6	987	44	2
2780100	60	599000	Maori Park	6404	Timaru Ward	64	Timaru District	13	Canterbury Region	2.37008e+06	5.64551e+06	1	2780100	4	946	21	2
420700	30	515600	Eden Terrace	704	Hobson Ward	7	Auckland City	02	Auckland Region	2.66707e+06	6.48035e+06	1	420700	7	1006	10	2
1469000	99	545761	Irongate	3003	Heretaunga Ward	30	Hastings District	06	Hawke's Bay Region	2.83772e+06	6.16501e+06	1	1469000	4	943	35	2
419600	129	515600	Eden Terrace	704	Hobson Ward	7	Auckland City	02	Auckland Region	2.66665e+06	6.48027e+06	1	419600	5	956	45	2
2123200	78	572900	Thorndon-Tinakori Road	4703	Lambton Ward	47	Wellington City	09	Wellington Region	2.65826e+06	5.99064e+06	1	2123200	5	967	27	2
2122900	99	572900	Thorndon-Tinakori Road	4703	Lambton Ward	47	Wellington City	09	Wellington Region	2.65852e+06	5.99095e+06	1	2122900	4	941	35	2
1599400	78	552100	Fitzroy	3301	New Plymouth City Ward	33	New Plymouth District	07	Taranaki Region	2.60558e+06	6.23902e+06	1	1599400	7	1023	27	2
1599500	51	552100	Fitzroy	3301	New Plymouth City Ward	33	New Plymouth District	07	Taranaki Region	2.60537e+06	6.23896e+06	1	1599500	5	955	18	2
420000	84	515600	Eden Terrace	704	Hobson Ward	7	Auckland City	02	Auckland Region	2.66667e+06	6.48043e+06	1	420000	9	1092	38	3
1599700	15	552100	Fitzroy	3301	New Plymouth City Ward	33	New Plymouth District	07	Taranaki Region	2.60561e+06	6.23877e+06	1	1599700	5	955	5	2
1468200	102	545762	Longlands South	3003	Heretaunga Ward	30	Hastings District	06	Hawke's Bay Region	2.83816e+06	6.16422e+06	1	1468200	5	961	36	2
1598501	87	552100	Fitzroy	3301	New Plymouth City Ward	33	New Plymouth District	07	Taranaki Region	2.60543e+06	6.23836e+06	1	1598501	4	944	30	2
2123700	66	573000	Lambton	4703	Lambton Ward	47	Wellington City	09	Wellington Region	2.65874e+06	5.99042e+06	1	2123700	5	970	23	2
1598300	93	552100	Fitzroy	3301	New Plymouth City Ward	33	New Plymouth District	07	Taranaki Region	2.60534e+06	6.23832e+06	1	1598300	6	984	33	2
1468300	96	545762	Longlands South	3003	Heretaunga Ward	30	Hastings District	06	Hawke's Bay Region	2.84163e+06	6.16383e+06	1	1468300	1	886	32	1
2123000	105	572900	Thorndon-Tinakori Road	4703	Lambton Ward	47	Wellington City	09	Wellington Region	2.65847e+06	5.99089e+06	1	2123000	3	926	35	1
1599600	171	552100	Fitzroy	3301	New Plymouth City Ward	33	New Plymouth District	07	Taranaki Region	2.60541e+06	6.2388e+06	1	1599600	10	1216	77	3
418700	114	515500	Arch Hill	701	Western Bays Ward	7	Auckland City	02	Auckland Region	2.66638e+06	6.48046e+06	1	418700	4	951	40	2
418800	87	515500	Arch Hill	701	Western Bays Ward	7	Auckland City	02	Auckland Region	2.66564e+06	6.48018e+06	1	418800	9	1080	39	3
1468500	120	545762	Longlands South	3003	Heretaunga Ward	30	Hastings District	06	Hawke's Bay Region	2.84073e+06	6.16483e+06	1	1468500	4	939	42	2
2123300	87	572900	Thorndon-Tinakori Road	4703	Lambton Ward	47	Wellington City	09	Wellington Region	2.6582e+06	5.99057e+06	1	2123300	5	967	30	2
419500	147	515600	Eden Terrace	703	Eden-Albert Ward	7	Auckland City	02	Auckland Region	2.6666e+06	6.48021e+06	1	419500	7	1007	51	2
1598401	30	552100	Fitzroy	3301	New Plymouth City Ward	33	New Plymouth District	07	Taranaki Region	2.6055e+06	6.23851e+06	1	1598401	4	944	10	2
1468600	120	545762	Longlands South	3003	Heretaunga Ward	30	Hastings District	06	Hawke's Bay Region	2.84091e+06	6.16394e+06	1	1468600	1	886	40	1
2781700	96	598800	Waimataitai	6404	Timaru Ward	64	Timaru District	13	Canterbury Region	2.36982e+06	5.64593e+06	1	2781700	5	968	34	2
423100	72	515201	Herne Bay	701	Western Bays Ward	7	Auckland City	02	Auckland Region	2.66515e+06	6.48267e+06	1	423100	2	900	24	1
1470313	126	548611	Kingsley-Chatham	3006	Flaxmere Ward	30	Hastings District	06	Hawke's Bay Region	2.8339e+06	6.16947e+06	1	1470313	10	1196	57	3
1471800	111	545721	Karamu	3003	Heretaunga Ward	30	Hastings District	06	Hawke's Bay Region	2.84268e+06	6.16853e+06	1	1471800	7	1023	39	2
1470314	195	548611	Kingsley-Chatham	3006	Flaxmere Ward	30	Hastings District	06	Hawke's Bay Region	2.83375e+06	6.16967e+06	1	1470314	10	1302	88	3
1471900	12	545721	Karamu	3003	Heretaunga Ward	30	Hastings District	06	Hawke's Bay Region	2.84302e+06	6.16934e+06	1	1471900	4	941	4	2
1468903	18	545842	Bridge Pa	3003	Heretaunga Ward	30	Hastings District	06	Hawke's Bay Region	2.83617e+06	6.1657e+06	1	1468903	4	938	6	2
1470205	6	545842	Bridge Pa	3003	Heretaunga Ward	30	Hastings District	06	Hawke's Bay Region	2.83606e+06	6.16591e+06	1	1470205	4	937	2	2
1601300	66	552200	Welbourn	3301	New Plymouth City Ward	33	New Plymouth District	07	Taranaki Region	2.60435e+06	6.23661e+06	1	1601300	9	1089	30	3
1601800	144	552200	Welbourn	3301	New Plymouth City Ward	33	New Plymouth District	07	Taranaki Region	2.60474e+06	6.23646e+06	1	1601800	7	1008	50	2
1601700	162	552200	Welbourn	3301	New Plymouth City Ward	33	New Plymouth District	07	Taranaki Region	2.60453e+06	6.23658e+06	1	1601700	7	1007	57	2
422500	135	515201	Herne Bay	701	Western Bays Ward	7	Auckland City	02	Auckland Region	2.66485e+06	6.48249e+06	1	422500	3	934	45	1
1470305	180	548611	Kingsley-Chatham	3006	Flaxmere Ward	30	Hastings District	06	Hawke's Bay Region	2.83409e+06	6.16936e+06	1	1470305	9	1133	81	3
1470317	96	548611	Kingsley-Chatham	3006	Flaxmere Ward	30	Hastings District	06	Hawke's Bay Region	2.83414e+06	6.16952e+06	1	1470317	10	1196	43	3
1470500	36	545710	Twyford	3003	Heretaunga Ward	30	Hastings District	06	Hawke's Bay Region	2.83375e+06	6.17172e+06	1	1470500	7	1014	13	2
1601400	138	552200	Welbourn	3301	New Plymouth City Ward	33	New Plymouth District	07	Taranaki Region	2.6044e+06	6.2369e+06	1	1601400	2	918	46	1
1601000	93	552200	Welbourn	3301	New Plymouth City Ward	33	New Plymouth District	07	Taranaki Region	2.60431e+06	6.23697e+06	1	1601000	2	904	31	1
421100	9	515600	Eden Terrace	704	Hobson Ward	7	Auckland City	02	Auckland Region	2.66727e+06	6.48013e+06	1	421100	7	1029	3	2
421000	84	515600	Eden Terrace	704	Hobson Ward	7	Auckland City	02	Auckland Region	2.66718e+06	6.48019e+06	1	421000	7	1006	29	2
421700	117	515201	Herne Bay	701	Western Bays Ward	7	Auckland City	02	Auckland Region	2.66425e+06	6.48224e+06	1	421700	1	886	39	1
1600500	60	552100	Fitzroy	3301	New Plymouth City Ward	33	New Plymouth District	07	Taranaki Region	2.60584e+06	6.23896e+06	1	1600500	6	988	21	2
2780300	150	599000	Maori Park	6404	Timaru Ward	64	Timaru District	13	Canterbury Region	2.36958e+06	5.6452e+06	1	2780300	6	982	52	2
1469200	156	547900	Raureka	3005	Hastings Ward	30	Hastings District	06	Hawke's Bay Region	2.83827e+06	6.16591e+06	1	1469200	7	1008	55	2
2780500	144	599000	Maori Park	6404	Timaru Ward	64	Timaru District	13	Canterbury Region	2.37005e+06	5.64517e+06	1	2780500	8	1071	65	3
2781000	117	598800	Waimataitai	6404	Timaru Ward	64	Timaru District	13	Canterbury Region	2.36975e+06	5.64657e+06	1	2781000	7	1015	41	2
1468901	27	545761	Irongate	3003	Heretaunga Ward	30	Hastings District	06	Hawke's Bay Region	2.83643e+06	6.16447e+06	1	1468901	4	938	9	2
1469600	147	545852	Pakipaki	3009	Poukawa Ward	30	Hastings District	06	Hawke's Bay Region	2.83544e+06	6.1628e+06	1	1469600	5	966	51	2
1469303	135	547900	Raureka	3005	Hastings Ward	30	Hastings District	06	Hawke's Bay Region	2.83811e+06	6.16583e+06	1	1469303	3	921	45	1
1469902	99	547900	Raureka	3005	Hastings Ward	30	Hastings District	06	Hawke's Bay Region	2.83783e+06	6.16732e+06	1	1469902	1	889	33	1
1469903	48	545761	Irongate	3003	Heretaunga Ward	30	Hastings District	06	Hawke's Bay Region	2.83689e+06	6.16767e+06	1	1469903	4	951	17	2
1601100	3	552200	Welbourn	3301	New Plymouth City Ward	33	New Plymouth District	07	Taranaki Region	2.60394e+06	6.23721e+06	1	1601100	9	1089	1	3
441504	3	514301	Grafton West	704	Hobson Ward	7	Auckland City	02	Auckland Region	2.66759e+06	6.48052e+06	1	441504	8	1066	1	3
421600	102	515201	Herne Bay	701	Western Bays Ward	7	Auckland City	02	Auckland Region	2.66441e+06	6.48232e+06	1	421600	1	886	34	1
420900	36	515600	Eden Terrace	704	Hobson Ward	7	Auckland City	02	Auckland Region	2.66695e+06	6.48026e+06	1	420900	7	1006	13	2
420600	33	515600	Eden Terrace	704	Hobson Ward	7	Auckland City	02	Auckland Region	2.66735e+06	6.48042e+06	1	420600	7	1029	12	2
1600800	33	552200	Welbourn	3301	New Plymouth City Ward	33	New Plymouth District	07	Taranaki Region	2.60417e+06	6.2374e+06	1	1600800	9	1089	15	3
420300	39	515600	Eden Terrace	704	Hobson Ward	7	Auckland City	02	Auckland Region	2.66704e+06	6.48055e+06	1	420300	7	1030	14	2
421200	78	515600	Eden Terrace	704	Hobson Ward	7	Auckland City	02	Auckland Region	2.66737e+06	6.48022e+06	1	421200	7	1029	27	2
1469302	57	547900	Raureka	3005	Hastings Ward	30	Hastings District	06	Hawke's Bay Region	2.83867e+06	6.16563e+06	1	1469302	3	921	19	1
1470102	39	545761	Irongate	3003	Heretaunga Ward	30	Hastings District	06	Hawke's Bay Region	2.8368e+06	6.16707e+06	1	1470102	4	942	14	2
420800	390	515600	Eden Terrace	704	Hobson Ward	7	Auckland City	02	Auckland Region	2.66699e+06	6.48035e+06	1	420800	6	986	136	2
1469400	183	548300	Akina	3005	Hastings Ward	30	Hastings District	06	Hawke's Bay Region	2.83887e+06	6.16533e+06	1	1469400	6	977	64	2
1470211	36	545842	Bridge Pa	3007	Maraekakaho Ward	30	Hastings District	06	Hawke's Bay Region	2.83259e+06	6.16607e+06	1	1470211	4	937	13	2
1599800	60	552100	Fitzroy	3301	New Plymouth City Ward	33	New Plymouth District	07	Taranaki Region	2.60561e+06	6.23892e+06	1	1599800	7	1023	21	2
1468800	120	545761	Irongate	3003	Heretaunga Ward	30	Hastings District	06	Hawke's Bay Region	2.83782e+06	6.16626e+06	1	1468800	4	938	42	2
1469802	51	547900	Raureka	3005	Hastings Ward	30	Hastings District	06	Hawke's Bay Region	2.83808e+06	6.16745e+06	1	1469802	6	990	18	2
421400	96	515201	Herne Bay	701	Western Bays Ward	7	Auckland City	02	Auckland Region	2.66423e+06	6.48241e+06	1	421400	1	886	32	1
420500	207	515600	Eden Terrace	704	Hobson Ward	7	Auckland City	02	Auckland Region	2.66725e+06	6.48038e+06	1	420500	4	944	72	2
2780700	171	599000	Maori Park	6404	Timaru Ward	64	Timaru District	13	Canterbury Region	2.36968e+06	5.64498e+06	1	2780700	4	938	60	2
2780600	120	599000	Maori Park	6404	Timaru Ward	64	Timaru District	13	Canterbury Region	2.36999e+06	5.64507e+06	1	2780600	7	999	42	2
420400	96	515600	Eden Terrace	704	Hobson Ward	7	Auckland City	02	Auckland Region	2.66712e+06	6.48049e+06	1	420400	7	1030	34	2
70204	330	503400	Maunu	205	Okara Ward	2	Whangarei District	01	Northland Region	2.62631e+06	6.60597e+06	1	70204	1	892	109	1
1600900	177	552200	Welbourn	3301	New Plymouth City Ward	33	New Plymouth District	07	Taranaki Region	2.60433e+06	6.23727e+06	1	1600900	5	959	62	2
1600600	33	552200	Welbourn	3301	New Plymouth City Ward	33	New Plymouth District	07	Taranaki Region	2.60406e+06	6.23761e+06	1	1600600	9	1089	15	3
424600	63	515202	St Marys	701	Western Bays Ward	7	Auckland City	02	Auckland Region	2.66587e+06	6.48292e+06	1	424600	4	951	22	2
1472300	78	545721	Karamu	3003	Heretaunga Ward	30	Hastings District	06	Hawke's Bay Region	2.84222e+06	6.16778e+06	1	1472300	8	1041	35	3
422200	24	515201	Herne Bay	701	Western Bays Ward	7	Auckland City	02	Auckland Region	2.66481e+06	6.48294e+06	1	422200	3	926	8	1
422400	54	515201	Herne Bay	701	Western Bays Ward	7	Auckland City	02	Auckland Region	2.66478e+06	6.48268e+06	1	422400	2	902	18	1
422100	165	515201	Herne Bay	701	Western Bays Ward	7	Auckland City	02	Auckland Region	2.66471e+06	6.48255e+06	1	422100	1	882	54	1
1602100	96	552200	Welbourn	3301	New Plymouth City Ward	33	New Plymouth District	07	Taranaki Region	2.6044e+06	6.23631e+06	1	1602100	7	1007	34	2
1470900	102	545710	Twyford	3003	Heretaunga Ward	30	Hastings District	06	Hawke's Bay Region	2.83586e+06	6.17034e+06	1	1470900	3	923	34	1
422000	87	515201	Herne Bay	701	Western Bays Ward	7	Auckland City	02	Auckland Region	2.66461e+06	6.48248e+06	1	422000	1	879	29	1
2781200	147	598800	Waimataitai	6404	Timaru Ward	64	Timaru District	13	Canterbury Region	2.36985e+06	5.64639e+06	1	2781200	7	1009	51	2
423000	81	515201	Herne Bay	701	Western Bays Ward	7	Auckland City	02	Auckland Region	2.66506e+06	6.48265e+06	1	423000	2	900	27	1
1471700	66	545721	Karamu	3003	Heretaunga Ward	30	Hastings District	06	Hawke's Bay Region	2.84215e+06	6.16813e+06	1	1471700	7	1023	23	2
1602000	81	552200	Welbourn	3301	New Plymouth City Ward	33	New Plymouth District	07	Taranaki Region	2.60445e+06	6.23612e+06	1	1602000	5	973	28	2
422800	123	515201	Herne Bay	701	Western Bays Ward	7	Auckland City	02	Auckland Region	2.66502e+06	6.48284e+06	1	422800	3	925	41	1
422700	48	515201	Herne Bay	701	Western Bays Ward	7	Auckland City	02	Auckland Region	2.66505e+06	6.48301e+06	1	422700	1	898	16	1
1470311	180	548611	Kingsley-Chatham	3006	Flaxmere Ward	30	Hastings District	06	Hawke's Bay Region	2.83347e+06	6.16978e+06	1	1470311	10	1259	81	3
1470319	156	548611	Kingsley-Chatham	3006	Flaxmere Ward	30	Hastings District	06	Hawke's Bay Region	2.8336e+06	6.16985e+06	1	1470319	10	1247	70	3
1470318	135	548611	Kingsley-Chatham	3006	Flaxmere Ward	30	Hastings District	06	Hawke's Bay Region	2.83355e+06	6.16998e+06	1	1470318	10	1151	61	3
421800	105	515201	Herne Bay	701	Western Bays Ward	7	Auckland City	02	Auckland Region	2.66464e+06	6.48277e+06	1	421800	2	904	35	1
423500	189	515201	Herne Bay	701	Western Bays Ward	7	Auckland City	02	Auckland Region	2.66532e+06	6.48281e+06	1	423500	3	929	62	1
423400	135	515201	Herne Bay	701	Western Bays Ward	7	Auckland City	02	Auckland Region	2.66523e+06	6.48268e+06	1	423400	4	947	47	2
1601500	54	552200	Welbourn	3301	New Plymouth City Ward	33	New Plymouth District	07	Taranaki Region	2.60457e+06	6.23679e+06	1	1601500	4	945	19	2
422900	93	515201	Herne Bay	701	Western Bays Ward	7	Auckland City	02	Auckland Region	2.66511e+06	6.48286e+06	1	422900	1	898	31	1
421900	132	515201	Herne Bay	701	Western Bays Ward	7	Auckland City	02	Auckland Region	2.66454e+06	6.48246e+06	1	421900	1	870	44	1
423300	99	515201	Herne Bay	701	Western Bays Ward	7	Auckland City	02	Auckland Region	2.66519e+06	6.4829e+06	1	423300	2	901	33	1
1472000	66	545721	Karamu	3003	Heretaunga Ward	30	Hastings District	06	Hawke's Bay Region	2.84247e+06	6.16819e+06	1	1472000	5	971	23	2
1601900	129	552200	Welbourn	3301	New Plymouth City Ward	33	New Plymouth District	07	Taranaki Region	2.60482e+06	6.236e+06	1	1601900	4	940	45	2
1471201	33	545710	Twyford	3003	Heretaunga Ward	30	Hastings District	06	Hawke's Bay Region	2.83856e+06	6.16998e+06	1	1471201	2	909	11	1
423200	69	515201	Herne Bay	701	Western Bays Ward	7	Auckland City	02	Auckland Region	2.66522e+06	6.48303e+06	1	423200	3	919	23	1
2781600	120	598800	Waimataitai	6404	Timaru Ward	64	Timaru District	13	Canterbury Region	2.37016e+06	5.64617e+06	1	2781600	5	964	42	2
2781300	129	598800	Waimataitai	6404	Timaru Ward	64	Timaru District	13	Canterbury Region	2.36997e+06	5.64625e+06	1	2781300	8	1054	58	3
2781100	93	598800	Waimataitai	6404	Timaru Ward	64	Timaru District	13	Canterbury Region	2.36968e+06	5.64637e+06	1	2781100	5	971	33	2
2781400	126	598800	Waimataitai	6404	Timaru Ward	64	Timaru District	13	Canterbury Region	2.36976e+06	5.64607e+06	1	2781400	8	1061	57	3
1470309	102	548611	Kingsley-Chatham	3006	Flaxmere Ward	30	Hastings District	06	Hawke's Bay Region	2.834e+06	6.16983e+06	1	1470309	10	1255	46	3
1471300	243	545710	Twyford	3003	Heretaunga Ward	30	Hastings District	06	Hawke's Bay Region	2.83947e+06	6.16915e+06	1	1471300	5	957	85	2
422300	39	515201	Herne Bay	701	Western Bays Ward	7	Auckland City	02	Auckland Region	2.66487e+06	6.48289e+06	1	422300	2	902	13	1
422600	192	515201	Herne Bay	701	Western Bays Ward	7	Auckland City	02	Auckland Region	2.66496e+06	6.48266e+06	1	422600	3	931	63	1
2785100	84	599100	Highfield	6404	Timaru Ward	64	Timaru District	13	Canterbury Region	2.36783e+06	5.64488e+06	1	2785100	6	989	29	2
425701	165	515202	St Marys	701	Western Bays Ward	7	Auckland City	02	Auckland Region	2.66601e+06	6.48289e+06	1	425701	3	924	54	1
426601	108	515301	Ponsonby West	701	Western Bays Ward	7	Auckland City	02	Auckland Region	2.6649e+06	6.48216e+06	1	426601	2	906	36	1
1475701	171	548620	Flaxmere East	3006	Flaxmere Ward	30	Hastings District	06	Hawke's Bay Region	2.83569e+06	6.16787e+06	1	1475701	10	1222	77	3
426400	81	515301	Ponsonby West	701	Western Bays Ward	7	Auckland City	02	Auckland Region	2.66495e+06	6.48237e+06	1	426400	3	926	27	1
425702	75	515202	St Marys	701	Western Bays Ward	7	Auckland City	02	Auckland Region	2.66624e+06	6.48277e+06	1	425702	3	926	25	1
1475200	183	548620	Flaxmere East	3006	Flaxmere Ward	30	Hastings District	06	Hawke's Bay Region	2.83519e+06	6.16831e+06	1	1475200	10	1297	82	3
427100	84	515301	Ponsonby West	701	Western Bays Ward	7	Auckland City	02	Auckland Region	2.66504e+06	6.4824e+06	1	427100	2	910	28	1
1473902	246	548611	Kingsley-Chatham	3006	Flaxmere Ward	30	Hastings District	06	Hawke's Bay Region	2.83404e+06	6.16922e+06	1	1473902	10	1198	111	3
1472900	39	545721	Karamu	3003	Heretaunga Ward	30	Hastings District	06	Hawke's Bay Region	2.84126e+06	6.16495e+06	1	1472900	4	940	14	2
1473700	9	548620	Flaxmere East	3006	Flaxmere Ward	30	Hastings District	06	Hawke's Bay Region	2.83499e+06	6.16862e+06	1	1473700	9	1090	4	3
425000	84	515202	St Marys	701	Western Bays Ward	7	Auckland City	02	Auckland Region	2.66579e+06	6.48256e+06	1	425000	4	951	29	2
424900	108	515202	St Marys	701	Western Bays Ward	7	Auckland City	02	Auckland Region	2.66585e+06	6.48264e+06	1	424900	3	934	36	1
424500	162	515202	St Marys	701	Western Bays Ward	7	Auckland City	02	Auckland Region	2.66566e+06	6.48271e+06	1	424500	2	915	53	1
1473400	6	548400	Woolwich	3006	Flaxmere Ward	30	Hastings District	06	Hawke's Bay Region	2.83637e+06	6.16958e+06	1	1473400	6	990	2	2
425200	93	515202	St Marys	701	Western Bays Ward	7	Auckland City	02	Auckland Region	2.66621e+06	6.48262e+06	1	425200	2	900	31	1
425300	111	515202	St Marys	701	Western Bays Ward	7	Auckland City	02	Auckland Region	2.66593e+06	6.48247e+06	1	425300	3	933	37	1
425100	126	515202	St Marys	701	Western Bays Ward	7	Auckland City	02	Auckland Region	2.66602e+06	6.48256e+06	1	425100	1	881	42	1
424701	45	515202	St Marys	701	Western Bays Ward	7	Auckland City	02	Auckland Region	2.66594e+06	6.48284e+06	1	424701	1	893	15	1
424702	78	515202	St Marys	701	Western Bays Ward	7	Auckland City	02	Auckland Region	2.66586e+06	6.48277e+06	1	424702	1	893	26	1
424400	36	515202	St Marys	701	Western Bays Ward	7	Auckland City	02	Auckland Region	2.6658e+06	6.48292e+06	1	424400	6	990	13	2
1473500	3	548400	Woolwich	3006	Flaxmere Ward	30	Hastings District	06	Hawke's Bay Region	2.83722e+06	6.1691e+06	1	1473500	6	990	1	2
1473600	36	548400	Woolwich	3006	Flaxmere Ward	30	Hastings District	06	Hawke's Bay Region	2.83739e+06	6.16923e+06	1	1473600	6	990	13	2
424800	156	515202	St Marys	701	Western Bays Ward	7	Auckland City	02	Auckland Region	2.66603e+06	6.48269e+06	1	424800	1	878	51	1
2123100	99	572900	Thorndon-Tinakori Road	4703	Lambton Ward	47	Wellington City	09	Wellington Region	2.65839e+06	5.99078e+06	1	2123100	2	899	33	1
425400	75	515202	St Marys	701	Western Bays Ward	7	Auckland City	02	Auckland Region	2.66614e+06	6.48243e+06	1	425400	1	879	25	1
2786602	108	599100	Highfield	6404	Timaru Ward	64	Timaru District	13	Canterbury Region	2.36808e+06	5.64481e+06	1	2786602	2	904	36	1
2786601	42	599100	Highfield	6404	Timaru Ward	64	Timaru District	13	Canterbury Region	2.36824e+06	5.64484e+06	1	2786601	4	951	15	2
952105	225	527006	Flagstaff	1602	East Ward	16	Hamilton City	03	Waikato Region	2.70907e+06	6.38234e+06	1	952105	4	938	79	2
1476800	123	547800	Frimley	3005	Hastings Ward	30	Hastings District	06	Hawke's Bay Region	2.83825e+06	6.16858e+06	1	1476800	7	1015	43	2
427700	144	515301	Ponsonby West	701	Western Bays Ward	7	Auckland City	02	Auckland Region	2.66529e+06	6.48228e+06	1	427700	2	909	48	1
1474101	243	548612	Lochain	3006	Flaxmere Ward	30	Hastings District	06	Hawke's Bay Region	2.83451e+06	6.16935e+06	1	1474101	10	1187	109	3
2786400	150	599100	Highfield	6404	Timaru Ward	64	Timaru District	13	Canterbury Region	2.36786e+06	5.64512e+06	1	2786400	5	962	52	2
2786200	63	599100	Highfield	6404	Timaru Ward	64	Timaru District	13	Canterbury Region	2.36795e+06	5.64522e+06	1	2786200	1	880	21	1
2786300	102	599100	Highfield	6404	Timaru Ward	64	Timaru District	13	Canterbury Region	2.36812e+06	5.6452e+06	1	2786300	1	896	34	1
426602	75	515301	Ponsonby West	701	Western Bays Ward	7	Auckland City	02	Auckland Region	2.66483e+06	6.48214e+06	1	426602	3	926	25	1
425500	108	515202	St Marys	701	Western Bays Ward	7	Auckland City	02	Auckland Region	2.66608e+06	6.48237e+06	1	425500	9	1119	49	3
426300	162	515301	Ponsonby West	701	Western Bays Ward	7	Auckland City	02	Auckland Region	2.6647e+06	6.48213e+06	1	426300	4	939	57	2
426200	159	515301	Ponsonby West	701	Western Bays Ward	7	Auckland City	02	Auckland Region	2.66449e+06	6.48215e+06	1	426200	2	910	52	1
426000	45	515202	St Marys	701	Western Bays Ward	7	Auckland City	02	Auckland Region	2.66631e+06	6.48253e+06	1	426000	1	896	15	1
425800	96	515202	St Marys	701	Western Bays Ward	7	Auckland City	02	Auckland Region	2.66623e+06	6.48271e+06	1	425800	3	928	32	1
1475702	147	548620	Flaxmere East	3006	Flaxmere Ward	30	Hastings District	06	Hawke's Bay Region	2.83574e+06	6.16801e+06	1	1475702	8	1037	66	3
1474500	291	548612	Lochain	3006	Flaxmere Ward	30	Hastings District	06	Hawke's Bay Region	2.83468e+06	6.16862e+06	1	1474500	9	1120	131	3
2785200	81	599100	Highfield	6404	Timaru Ward	64	Timaru District	13	Canterbury Region	2.36773e+06	5.64472e+06	1	2785200	3	934	27	1
2785300	90	599100	Highfield	6404	Timaru Ward	64	Timaru District	13	Canterbury Region	2.368e+06	5.64469e+06	1	2785300	6	989	31	2
2785902	129	599100	Highfield	6404	Timaru Ward	64	Timaru District	13	Canterbury Region	2.36771e+06	5.64518e+06	1	2785902	3	935	43	1
1474102	198	548612	Lochain	3006	Flaxmere Ward	30	Hastings District	06	Hawke's Bay Region	2.83435e+06	6.16919e+06	1	1474102	10	1154	89	3
1474103	177	548612	Lochain	3006	Flaxmere Ward	30	Hastings District	06	Hawke's Bay Region	2.83485e+06	6.16921e+06	1	1474103	10	1237	80	3
1474201	72	548620	Flaxmere East	3006	Flaxmere Ward	30	Hastings District	06	Hawke's Bay Region	2.8352e+06	6.169e+06	1	1474201	10	1193	32	3
1475300	180	548620	Flaxmere East	3006	Flaxmere Ward	30	Hastings District	06	Hawke's Bay Region	2.8354e+06	6.16813e+06	1	1475300	10	1161	81	3
426500	138	515301	Ponsonby West	701	Western Bays Ward	7	Auckland City	02	Auckland Region	2.66498e+06	6.48217e+06	1	426500	3	935	46	1
426100	342	515202	St Marys	701	Western Bays Ward	7	Auckland City	02	Auckland Region	2.66651e+06	6.48236e+06	1	426100	3	928	113	1
1474400	240	548612	Lochain	3006	Flaxmere Ward	30	Hastings District	06	Hawke's Bay Region	2.83455e+06	6.1688e+06	1	1474400	9	1090	108	3
425900	63	515202	St Marys	701	Western Bays Ward	7	Auckland City	02	Auckland Region	2.66644e+06	6.48265e+06	1	425900	1	896	21	1
2788000	99	599100	Highfield	6404	Timaru Ward	64	Timaru District	13	Canterbury Region	2.36861e+06	5.64495e+06	1	2788000	2	901	33	1
430000	57	515302	Ponsonby East	701	Western Bays Ward	7	Auckland City	02	Auckland Region	2.66583e+06	6.48214e+06	1	430000	5	962	20	2
1478800	84	548500	Camberley	3005	Hastings Ward	30	Hastings District	06	Hawke's Bay Region	2.8385e+06	6.16792e+06	1	1478800	8	1058	38	3
1478200	189	548500	Camberley	3005	Hastings Ward	30	Hastings District	06	Hawke's Bay Region	2.83731e+06	6.16856e+06	1	1478200	10	1337	85	3
1477200	78	547800	Frimley	3005	Hastings Ward	30	Hastings District	06	Hawke's Bay Region	2.83853e+06	6.1686e+06	1	1477200	4	938	27	2
1477600	72	547800	Frimley	3005	Hastings Ward	30	Hastings District	06	Hawke's Bay Region	2.83938e+06	6.16849e+06	1	1477600	8	1041	32	3
1478900	72	548500	Camberley	3005	Hastings Ward	30	Hastings District	06	Hawke's Bay Region	2.83747e+06	6.16862e+06	1	1478900	10	1365	32	3
1478400	60	548500	Camberley	3005	Hastings Ward	30	Hastings District	06	Hawke's Bay Region	2.83767e+06	6.16835e+06	1	1478400	9	1075	27	3
2788300	114	599400	Fraser Park	6404	Timaru Ward	64	Timaru District	13	Canterbury Region	2.36886e+06	5.64473e+06	1	2788300	4	952	40	2
2788100	42	599400	Fraser Park	6404	Timaru Ward	64	Timaru District	13	Canterbury Region	2.36844e+06	5.6447e+06	1	2788100	2	914	14	1
430400	66	515302	Ponsonby East	701	Western Bays Ward	7	Auckland City	02	Auckland Region	2.66584e+06	6.48194e+06	1	430400	3	925	22	1
2787100	147	599100	Highfield	6404	Timaru Ward	64	Timaru District	13	Canterbury Region	2.36889e+06	5.64528e+06	1	2787100	7	1006	51	2
2787600	12	599100	Highfield	6404	Timaru Ward	64	Timaru District	13	Canterbury Region	2.36864e+06	5.64521e+06	1	2787600	2	901	4	1
2787300	171	599100	Highfield	6404	Timaru Ward	64	Timaru District	13	Canterbury Region	2.36939e+06	5.64504e+06	1	2787300	5	958	60	2
2787500	183	599100	Highfield	6404	Timaru Ward	64	Timaru District	13	Canterbury Region	2.36841e+06	5.64521e+06	1	2787500	5	966	64	2
2787200	93	599100	Highfield	6404	Timaru Ward	64	Timaru District	13	Canterbury Region	2.36925e+06	5.64514e+06	1	2787200	3	930	31	1
2787400	135	599100	Highfield	6404	Timaru Ward	64	Timaru District	13	Canterbury Region	2.36917e+06	5.645e+06	1	2787400	4	941	47	2
427500	138	515301	Ponsonby West	701	Western Bays Ward	7	Auckland City	02	Auckland Region	2.66521e+06	6.48227e+06	1	427500	2	906	46	1
1475800	255	548620	Flaxmere East	3006	Flaxmere Ward	30	Hastings District	06	Hawke's Bay Region	2.83592e+06	6.16797e+06	1	1475800	7	1000	89	2
952109	177	529401	Queenwood	1602	East Ward	16	Hamilton City	03	Waikato Region	2.70948e+06	6.38191e+06	1	952109	1	865	58	1
1476500	159	548620	Flaxmere East	3006	Flaxmere Ward	30	Hastings District	06	Hawke's Bay Region	2.8355e+06	6.1684e+06	1	1476500	8	1051	72	3
427800	84	515301	Ponsonby West	701	Western Bays Ward	7	Auckland City	02	Auckland Region	2.66532e+06	6.48239e+06	1	427800	3	919	28	1
2786700	96	599100	Highfield	6404	Timaru Ward	64	Timaru District	13	Canterbury Region	2.36842e+06	5.64479e+06	1	2786700	6	991	34	2
427900	69	515301	Ponsonby West	701	Western Bays Ward	7	Auckland City	02	Auckland Region	2.66537e+06	6.48239e+06	1	427900	3	919	23	1
952104	120	527006	Flagstaff	1602	East Ward	16	Hamilton City	03	Waikato Region	2.70883e+06	6.38221e+06	1	952104	2	902	40	1
1477100	120	547800	Frimley	3005	Hastings Ward	30	Hastings District	06	Hawke's Bay Region	2.83835e+06	6.16846e+06	1	1477100	7	1005	42	2
1476400	171	548620	Flaxmere East	3006	Flaxmere Ward	30	Hastings District	06	Hawke's Bay Region	2.8358e+06	6.1684e+06	1	1476400	9	1091	77	3
1476300	120	548620	Flaxmere East	3006	Flaxmere Ward	30	Hastings District	06	Hawke's Bay Region	2.83583e+06	6.16847e+06	1	1476300	9	1072	54	3
427600	135	515301	Ponsonby West	701	Western Bays Ward	7	Auckland City	02	Auckland Region	2.66524e+06	6.48228e+06	1	427600	1	882	45	1
427300	123	515301	Ponsonby West	701	Western Bays Ward	7	Auckland City	02	Auckland Region	2.66512e+06	6.48227e+06	1	427300	3	928	41	1
2787700	216	599100	Highfield	6404	Timaru Ward	64	Timaru District	13	Canterbury Region	2.36835e+06	5.645e+06	1	2787700	2	910	71	1
2787800	3	599100	Highfield	6404	Timaru Ward	64	Timaru District	13	Canterbury Region	2.36861e+06	5.64507e+06	1	2787800	2	901	1	1
2786500	93	599100	Highfield	6404	Timaru Ward	64	Timaru District	13	Canterbury Region	2.36807e+06	5.645e+06	1	2786500	1	880	31	1
427400	123	515301	Ponsonby West	701	Western Bays Ward	7	Auckland City	02	Auckland Region	2.66515e+06	6.48227e+06	1	427400	2	907	41	1
1476000	156	548620	Flaxmere East	3006	Flaxmere Ward	30	Hastings District	06	Hawke's Bay Region	2.83562e+06	6.16874e+06	1	1476000	7	1021	55	2
1476700	126	547800	Frimley	3005	Hastings Ward	30	Hastings District	06	Hawke's Bay Region	2.838e+06	6.16872e+06	1	1476700	7	1021	44	2
2790500	105	599400	Fraser Park	6404	Timaru Ward	64	Timaru District	13	Canterbury Region	2.36945e+06	5.64395e+06	1	2790500	6	982	37	2
431700	72	515302	Ponsonby East	701	Western Bays Ward	7	Auckland City	02	Auckland Region	2.66596e+06	6.48153e+06	1	431700	6	982	25	2
1479800	63	547900	Raureka	3005	Hastings Ward	30	Hastings District	06	Hawke's Bay Region	2.83792e+06	6.16719e+06	1	1479800	5	972	22	2
1480200	135	547900	Raureka	3005	Hastings Ward	30	Hastings District	06	Hawke's Bay Region	2.83831e+06	6.16718e+06	1	1480200	6	987	47	2
431600	111	515302	Ponsonby East	701	Western Bays Ward	7	Auckland City	02	Auckland Region	2.66577e+06	6.48151e+06	1	431600	6	982	39	2
431800	111	515302	Ponsonby East	701	Western Bays Ward	7	Auckland City	02	Auckland Region	2.66568e+06	6.48145e+06	1	431800	4	938	39	2
2790800	93	599500	Seaview	6404	Timaru Ward	64	Timaru District	13	Canterbury Region	2.36984e+06	5.64471e+06	1	2790800	7	1002	33	2
431100	24	515302	Ponsonby East	701	Western Bays Ward	7	Auckland City	02	Auckland Region	2.66594e+06	6.48168e+06	1	431100	5	956	8	2
431400	54	515302	Ponsonby East	701	Western Bays Ward	7	Auckland City	02	Auckland Region	2.66553e+06	6.48149e+06	1	431400	4	952	19	2
1480100	150	547900	Raureka	3005	Hastings Ward	30	Hastings District	06	Hawke's Bay Region	2.83807e+06	6.167e+06	1	1480100	7	1026	52	2
1480700	111	547900	Raureka	3005	Hastings Ward	30	Hastings District	06	Hawke's Bay Region	2.83872e+06	6.16656e+06	1	1480700	8	1042	50	3
1480300	222	547900	Raureka	3005	Hastings Ward	30	Hastings District	06	Hawke's Bay Region	2.83841e+06	6.16708e+06	1	1480300	6	990	78	2
1477400	102	547800	Frimley	3005	Hastings Ward	30	Hastings District	06	Hawke's Bay Region	2.83851e+06	6.16833e+06	1	1477400	4	938	36	2
1479000	102	548500	Camberley	3005	Hastings Ward	30	Hastings District	06	Hawke's Bay Region	2.8375e+06	6.16837e+06	1	1479000	10	1249	46	3
1478300	69	548500	Camberley	3005	Hastings Ward	30	Hastings District	06	Hawke's Bay Region	2.83749e+06	6.1685e+06	1	1478300	10	1476	31	3
429000	54	515302	Ponsonby East	701	Western Bays Ward	7	Auckland City	02	Auckland Region	2.66566e+06	6.48252e+06	1	429000	3	919	18	1
428700	141	515302	Ponsonby East	701	Western Bays Ward	7	Auckland City	02	Auckland Region	2.66541e+06	6.48237e+06	1	428700	2	904	47	1
1477800	90	547800	Frimley	3005	Hastings Ward	30	Hastings District	06	Hawke's Bay Region	2.83877e+06	6.16806e+06	1	1477800	8	1041	40	3
428800	78	515302	Ponsonby East	701	Western Bays Ward	7	Auckland City	02	Auckland Region	2.66547e+06	6.48238e+06	1	428800	3	918	26	1
429900	114	515302	Ponsonby East	701	Western Bays Ward	7	Auckland City	02	Auckland Region	2.66564e+06	6.48215e+06	1	429900	4	943	40	2
1478500	90	548500	Camberley	3005	Hastings Ward	30	Hastings District	06	Hawke's Bay Region	2.83804e+06	6.16844e+06	1	1478500	9	1075	40	3
1478100	129	548500	Camberley	3005	Hastings Ward	30	Hastings District	06	Hawke's Bay Region	2.83738e+06	6.16871e+06	1	1478100	10	1476	58	3
429100	81	515302	Ponsonby East	701	Western Bays Ward	7	Auckland City	02	Auckland Region	2.66554e+06	6.4825e+06	1	429100	4	946	28	2
2789000	219	599400	Fraser Park	6404	Timaru Ward	64	Timaru District	13	Canterbury Region	2.36921e+06	5.64467e+06	1	2789000	5	970	77	2
2789100	189	599400	Fraser Park	6404	Timaru Ward	64	Timaru District	13	Canterbury Region	2.36944e+06	5.64474e+06	1	2789100	7	1026	66	2
2788400	156	599400	Fraser Park	6404	Timaru Ward	64	Timaru District	13	Canterbury Region	2.36903e+06	5.64465e+06	1	2788400	7	1030	55	2
430200	69	515302	Ponsonby East	701	Western Bays Ward	7	Auckland City	02	Auckland Region	2.66586e+06	6.48202e+06	1	430200	5	962	24	2
429400	78	515302	Ponsonby East	701	Western Bays Ward	7	Auckland City	02	Auckland Region	2.66574e+06	6.48225e+06	1	429400	4	946	27	2
429500	24	515302	Ponsonby East	701	Western Bays Ward	7	Auckland City	02	Auckland Region	2.66589e+06	6.4823e+06	1	429500	3	919	8	1
1477500	195	547800	Frimley	3005	Hastings Ward	30	Hastings District	06	Hawke's Bay Region	2.83873e+06	6.16835e+06	1	1477500	6	977	68	2
2789200	156	599400	Fraser Park	6404	Timaru Ward	64	Timaru District	13	Canterbury Region	2.36944e+06	5.64451e+06	1	2789200	4	939	55	2
1469801	30	545761	Irongate	3005	Hastings Ward	30	Hastings District	06	Hawke's Bay Region	2.83756e+06	6.16786e+06	1	1469801	4	951	10	2
1478600	153	548500	Camberley	3005	Hastings Ward	30	Hastings District	06	Hawke's Bay Region	2.83786e+06	6.16827e+06	1	1478600	10	1311	69	3
1478700	30	548500	Camberley	3005	Hastings Ward	30	Hastings District	06	Hawke's Bay Region	2.83837e+06	6.16825e+06	1	1478700	10	1311	14	3
428900	84	515302	Ponsonby East	701	Western Bays Ward	7	Auckland City	02	Auckland Region	2.66551e+06	6.48239e+06	1	428900	3	918	28	1
1477700	75	547800	Frimley	3005	Hastings Ward	30	Hastings District	06	Hawke's Bay Region	2.83863e+06	6.16818e+06	1	1477700	5	955	26	2
2787900	264	599100	Highfield	6404	Timaru Ward	64	Timaru District	13	Canterbury Region	2.36891e+06	5.645e+06	1	2787900	4	936	92	2
429300	102	515302	Ponsonby East	701	Western Bays Ward	7	Auckland City	02	Auckland Region	2.66579e+06	6.48238e+06	1	429300	3	919	34	1
430100	138	515302	Ponsonby East	701	Western Bays Ward	7	Auckland City	02	Auckland Region	2.66565e+06	6.48206e+06	1	430100	4	947	48	2
433801	12	514102	Auckland Central West	704	Hobson Ward	7	Auckland City	02	Auckland Region	2.66753e+06	6.48213e+06	1	433801	10	1198	5	3
958100	63	527131	Tamahere-Tauwhare	1307	Eureka Ward	13	Waikato District	03	Waikato Region	2.72547e+06	6.3765e+06	1	958100	6	979	22	2
1481600	114	547900	Raureka	3005	Hastings Ward	30	Hastings District	06	Hawke's Bay Region	2.83809e+06	6.16666e+06	1	1481600	10	1295	51	3
1470316	243	548611	Kingsley-Chatham	3006	Flaxmere Ward	30	Hastings District	06	Hawke's Bay Region	2.83422e+06	6.16957e+06	1	1470316	10	1282	109	3
433003	165	514101	Auckland Harbourside	704	Hobson Ward	7	Auckland City	02	Auckland Region	2.66756e+06	6.48259e+06	1	433003	6	982	58	2
433403	81	514102	Auckland Central West	704	Hobson Ward	7	Auckland City	02	Auckland Region	2.66753e+06	6.48225e+06	1	433403	10	1152	36	3
2791700	66	599500	Seaview	6404	Timaru Ward	64	Timaru District	13	Canterbury Region	2.37024e+06	5.64466e+06	1	2791700	8	1051	30	3
2791500	147	599500	Seaview	6404	Timaru Ward	64	Timaru District	13	Canterbury Region	2.37007e+06	5.64477e+06	1	2791500	8	1051	66	3
433303	306	514102	Auckland Central West	704	Hobson Ward	7	Auckland City	02	Auckland Region	2.6674e+06	6.4823e+06	1	433303	10	1167	138	3
171603	72	505805	Orewa	403	Eastern Ward	4	Rodney District	02	Auckland Region	2.66188e+06	6.51174e+06	1	171603	8	1067	32	3
433102	87	514102	Auckland Central West	704	Hobson Ward	7	Auckland City	02	Auckland Region	2.66777e+06	6.48257e+06	1	433102	9	1103	39	3
433304	87	514102	Auckland Central West	704	Hobson Ward	7	Auckland City	02	Auckland Region	2.66747e+06	6.48228e+06	1	433304	9	1100	39	3
1481900	108	547900	Raureka	3005	Hastings Ward	30	Hastings District	06	Hawke's Bay Region	2.83838e+06	6.16615e+06	1	1481900	9	1094	49	3
1481700	87	547900	Raureka	3005	Hastings Ward	30	Hastings District	06	Hawke's Bay Region	2.83794e+06	6.16658e+06	1	1481700	10	1236	39	3
1480800	138	547900	Raureka	3005	Hastings Ward	30	Hastings District	06	Hawke's Bay Region	2.83846e+06	6.16649e+06	1	1480800	6	980	48	2
2791000	126	599500	Seaview	6404	Timaru Ward	64	Timaru District	13	Canterbury Region	2.36987e+06	5.64449e+06	1	2791000	8	1037	57	3
2791100	72	599500	Seaview	6404	Timaru Ward	64	Timaru District	13	Canterbury Region	2.36967e+06	5.64434e+06	1	2791100	5	965	25	2
431900	54	515302	Ponsonby East	701	Western Bays Ward	7	Auckland City	02	Auckland Region	2.66595e+06	6.48147e+06	1	431900	4	938	19	2
431300	123	515302	Ponsonby East	701	Western Bays Ward	7	Auckland City	02	Auckland Region	2.66576e+06	6.48156e+06	1	431300	4	950	43	2
1479500	114	548500	Camberley	3005	Hastings Ward	30	Hastings District	06	Hawke's Bay Region	2.83794e+06	6.16801e+06	1	1479500	10	1220	51	3
1479300	138	548500	Camberley	3005	Hastings Ward	30	Hastings District	06	Hawke's Bay Region	2.83778e+06	6.16808e+06	1	1479300	10	1347	62	3
432000	102	515302	Ponsonby East	701	Western Bays Ward	7	Auckland City	02	Auckland Region	2.66579e+06	6.48139e+06	1	432000	3	927	34	1
1480000	123	547900	Raureka	3005	Hastings Ward	30	Hastings District	06	Hawke's Bay Region	2.83824e+06	6.16727e+06	1	1480000	6	977	43	2
2790700	135	599500	Seaview	6404	Timaru Ward	64	Timaru District	13	Canterbury Region	2.36966e+06	5.64472e+06	1	2790700	5	970	47	2
2791400	138	599500	Seaview	6404	Timaru Ward	64	Timaru District	13	Canterbury Region	2.36969e+06	5.64385e+06	1	2791400	7	1018	48	2
1479600	135	548500	Camberley	3005	Hastings Ward	30	Hastings District	06	Hawke's Bay Region	2.83812e+06	6.1677e+06	1	1479600	8	1038	61	3
1469904	60	545761	Irongate	3003	Heretaunga Ward	30	Hastings District	06	Hawke's Bay Region	2.8376e+06	6.16776e+06	1	1469904	6	990	21	2
432100	102	515302	Ponsonby East	701	Western Bays Ward	7	Auckland City	02	Auckland Region	2.66598e+06	6.4814e+06	1	432100	3	921	34	1
2790900	90	599500	Seaview	6404	Timaru Ward	64	Timaru District	13	Canterbury Region	2.36967e+06	5.64453e+06	1	2790900	5	965	31	2
1480400	171	547900	Raureka	3005	Hastings Ward	30	Hastings District	06	Hawke's Bay Region	2.83851e+06	6.1669e+06	1	1480400	6	996	60	2
1479700	84	548500	Camberley	3005	Hastings Ward	30	Hastings District	06	Hawke's Bay Region	2.83809e+06	6.16761e+06	1	1479700	10	1220	38	3
1479100	111	548500	Camberley	3005	Hastings Ward	30	Hastings District	06	Hawke's Bay Region	2.83762e+06	6.16829e+06	1	1479100	10	1238	50	3
1479400	171	548500	Camberley	3005	Hastings Ward	30	Hastings District	06	Hawke's Bay Region	2.83766e+06	6.16808e+06	1	1479400	10	1151	77	3
2791200	138	599500	Seaview	6404	Timaru Ward	64	Timaru District	13	Canterbury Region	2.36988e+06	5.64428e+06	1	2791200	9	1089	62	3
431500	51	515302	Ponsonby East	701	Western Bays Ward	7	Auckland City	02	Auckland Region	2.66562e+06	6.4815e+06	1	431500	4	952	18	2
1479900	132	547900	Raureka	3005	Hastings Ward	30	Hastings District	06	Hawke's Bay Region	2.83817e+06	6.16737e+06	1	1479900	5	972	46	2
1479200	93	548500	Camberley	3005	Hastings Ward	30	Hastings District	06	Hawke's Bay Region	2.83768e+06	6.16819e+06	1	1479200	10	1249	42	3
2791300	141	599500	Seaview	6404	Timaru Ward	64	Timaru District	13	Canterbury Region	2.36969e+06	5.64411e+06	1	2791300	9	1112	63	3
430700	66	515302	Ponsonby East	701	Western Bays Ward	7	Auckland City	02	Auckland Region	2.66585e+06	6.48185e+06	1	430700	2	901	22	1
1480500	129	547900	Raureka	3005	Hastings Ward	30	Hastings District	06	Hawke's Bay Region	2.83827e+06	6.16674e+06	1	1480500	6	995	45	2
1480600	207	547900	Raureka	3005	Hastings Ward	30	Hastings District	06	Hawke's Bay Region	2.83859e+06	6.16672e+06	1	1480600	7	1028	72	2
434402	201	514102	Auckland Central West	704	Hobson Ward	7	Auckland City	02	Auckland Region	2.66701e+06	6.48175e+06	1	434402	9	1112	90	3
2794100	126	599500	Seaview	6404	Timaru Ward	64	Timaru District	13	Canterbury Region	2.37007e+06	5.64406e+06	1	2794100	10	1146	57	3
2794200	45	599500	Seaview	6404	Timaru Ward	64	Timaru District	13	Canterbury Region	2.37022e+06	5.64406e+06	1	2794200	9	1117	20	3
2794300	18	599500	Seaview	6404	Timaru Ward	64	Timaru District	13	Canterbury Region	2.3703e+06	5.64409e+06	1	2794300	9	1117	8	3
2794400	9	599500	Seaview	6404	Timaru Ward	64	Timaru District	13	Canterbury Region	2.37042e+06	5.64412e+06	1	2794400	9	1117	4	3
2794800	15	599500	Seaview	6404	Timaru Ward	64	Timaru District	13	Canterbury Region	2.3705e+06	5.64387e+06	1	2794800	9	1117	7	3
3187903	111	612802	Riverton West	7305	Riverton Ward	73	Southland District	15	Southland Region	2.12694e+06	5.41491e+06	1	3187903	6	980	39	2
3187801	21	612730	Te Waewae	7305	Riverton Ward	73	Southland District	15	Southland Region	2.12483e+06	5.4166e+06	1	3187801	7	1027	7	2
1482600	123	547900	Raureka	3005	Hastings Ward	30	Hastings District	06	Hawke's Bay Region	2.83871e+06	6.1657e+06	1	1482600	5	968	43	2
435500	78	514102	Auckland Central West	704	Hobson Ward	7	Auckland City	02	Auckland Region	2.66719e+06	6.48135e+06	1	435500	8	1062	35	3
959600	117	527132	Hautapu	1703	Maungatautari Ward	17	Waipa District	03	Waikato Region	2.72449e+06	6.36967e+06	1	959600	2	911	39	1
172603	111	505802	Red Beach	403	Eastern Ward	4	Rodney District	02	Auckland Region	2.66152e+06	6.50953e+06	1	172603	3	927	37	1
434902	36	514102	Auckland Central West	704	Hobson Ward	7	Auckland City	02	Auckland Region	2.66733e+06	6.48159e+06	1	434902	9	1130	16	3
566500	195	518600	Royal Oak	704	Hobson Ward	7	Auckland City	02	Auckland Region	2.66837e+06	6.47609e+06	1	566500	6	975	68	2
959400	30	535241	Karapiro	1703	Maungatautari Ward	17	Waipa District	03	Waikato Region	2.73414e+06	6.36983e+06	1	959400	1	893	10	1
434401	201	514102	Auckland Central West	704	Hobson Ward	7	Auckland City	02	Auckland Region	2.66709e+06	6.48189e+06	1	434401	8	1037	90	3
172803	144	505802	Red Beach	403	Eastern Ward	4	Rodney District	02	Auckland Region	2.66169e+06	6.50913e+06	1	172803	5	960	50	2
433001	60	514101	Auckland Harbourside	704	Hobson Ward	7	Auckland City	02	Auckland Region	2.66762e+06	6.48277e+06	1	433001	4	939	21	2
2792800	6	599500	Seaview	6404	Timaru Ward	64	Timaru District	13	Canterbury Region	2.37067e+06	5.6444e+06	1	2792800	8	1061	3	3
2791900	78	599500	Seaview	6404	Timaru Ward	64	Timaru District	13	Canterbury Region	2.3701e+06	5.64444e+06	1	2791900	6	989	27	2
2792000	33	599500	Seaview	6404	Timaru Ward	64	Timaru District	13	Canterbury Region	2.37029e+06	5.64447e+06	1	2792000	6	989	12	2
2793100	3	599500	Seaview	6404	Timaru Ward	64	Timaru District	13	Canterbury Region	2.37119e+06	5.64418e+06	1	2793100	8	1061	1	3
2792700	66	599500	Seaview	6404	Timaru Ward	64	Timaru District	13	Canterbury Region	2.37076e+06	5.64448e+06	1	2792700	8	1061	30	3
50304	45	501200	Haruru Falls	102	Eastern Ward	1	Far North District	01	Northland Region	2.60639e+06	6.65734e+06	1	50304	5	958	16	2
1482400	111	547900	Raureka	3005	Hastings Ward	30	Hastings District	06	Hawke's Bay Region	2.83887e+06	6.16587e+06	1	1482400	7	1019	39	2
1482200	132	547900	Raureka	3005	Hastings Ward	30	Hastings District	06	Hawke's Bay Region	2.83843e+06	6.16596e+06	1	1482200	9	1128	59	3
1481100	96	547900	Raureka	3005	Hastings Ward	30	Hastings District	06	Hawke's Bay Region	2.8377e+06	6.16697e+06	1	1481100	10	1285	43	3
137704	30	506616	Matheson Bay	401	Northern Ward	4	Rodney District	02	Auckland Region	2.67215e+06	6.54318e+06	1	137704	6	985	10	2
433402	246	514102	Auckland Central West	704	Hobson Ward	7	Auckland City	02	Auckland Region	2.66756e+06	6.48229e+06	1	433402	10	1213	111	3
433501	84	514102	Auckland Central West	704	Hobson Ward	7	Auckland City	02	Auckland Region	2.66779e+06	6.48233e+06	1	433501	10	1188	38	3
433502	132	514102	Auckland Central West	704	Hobson Ward	7	Auckland City	02	Auckland Region	2.66775e+06	6.48228e+06	1	433502	10	1161	59	3
3185900	12	612740	Fairfax	7305	Riverton Ward	73	Southland District	15	Southland Region	2.12742e+06	5.41793e+06	1	3185900	5	960	4	2
1480900	219	547900	Raureka	3005	Hastings Ward	30	Hastings District	06	Hawke's Bay Region	2.83816e+06	6.16642e+06	1	1480900	9	1106	99	3
1481400	126	547900	Raureka	3005	Hastings Ward	30	Hastings District	06	Hawke's Bay Region	2.83793e+06	6.16682e+06	1	1481400	10	1236	57	3
433301	333	514102	Auckland Central West	704	Hobson Ward	7	Auckland City	02	Auckland Region	2.66746e+06	6.48238e+06	1	433301	8	1041	150	3
433503	111	514102	Auckland Central West	704	Hobson Ward	7	Auckland City	02	Auckland Region	2.66782e+06	6.48224e+06	1	433503	10	1188	50	3
3185800	33	612740	Fairfax	7305	Riverton Ward	73	Southland District	15	Southland Region	2.12962e+06	5.42018e+06	1	3185800	5	960	12	2
433103	135	514102	Auckland Central West	704	Hobson Ward	7	Auckland City	02	Auckland Region	2.66769e+06	6.48244e+06	1	433103	9	1103	61	3
1481000	117	547900	Raureka	3005	Hastings Ward	30	Hastings District	06	Hawke's Bay Region	2.8383e+06	6.16626e+06	1	1481000	6	991	41	2
171400	93	505805	Orewa	403	Eastern Ward	4	Rodney District	02	Auckland Region	2.66206e+06	6.51181e+06	1	171400	4	943	33	2
432200	123	515302	Ponsonby East	701	Western Bays Ward	7	Auckland City	02	Auckland Region	2.66571e+06	6.4813e+06	1	432200	2	908	41	1
171500	183	505805	Orewa	403	Eastern Ward	4	Rodney District	02	Auckland Region	2.66204e+06	6.51156e+06	1	171500	9	1101	82	3
2792500	18	599500	Seaview	6404	Timaru Ward	64	Timaru District	13	Canterbury Region	2.37037e+06	5.6447e+06	1	2792500	8	1051	8	3
432300	69	515302	Ponsonby East	701	Western Bays Ward	7	Auckland City	02	Auckland Region	2.66597e+06	6.48133e+06	1	432300	3	921	23	1
433005	54	514101	Auckland Harbourside	704	Hobson Ward	7	Auckland City	02	Auckland Region	2.66743e+06	6.48264e+06	1	433005	1	888	18	1
433802	135	514102	Auckland Central West	704	Hobson Ward	7	Auckland City	02	Auckland Region	2.66758e+06	6.4821e+06	1	433802	10	1198	61	3
1482000	114	547900	Raureka	3005	Hastings Ward	30	Hastings District	06	Hawke's Bay Region	2.83861e+06	6.16618e+06	1	1482000	3	918	38	1
2792100	9	599500	Seaview	6404	Timaru Ward	64	Timaru District	13	Canterbury Region	2.37043e+06	5.64445e+06	1	2792100	8	1061	4	3
2791600	123	599500	Seaview	6404	Timaru Ward	64	Timaru District	13	Canterbury Region	2.37003e+06	5.64467e+06	1	2791600	7	1014	43	2
2791800	99	599500	Seaview	6404	Timaru Ward	64	Timaru District	13	Canterbury Region	2.37009e+06	5.64455e+06	1	2791800	5	958	35	2
433600	33	514102	Auckland Central West	704	Hobson Ward	7	Auckland City	02	Auckland Region	2.66775e+06	6.48219e+06	1	433600	10	1152	15	3
171601	78	505805	Orewa	403	Eastern Ward	4	Rodney District	02	Auckland Region	2.66189e+06	6.51194e+06	1	171601	8	1067	35	3
433101	105	514102	Auckland Central West	704	Hobson Ward	7	Auckland City	02	Auckland Region	2.66768e+06	6.48258e+06	1	433101	8	1049	47	3
1482300	135	547900	Raureka	3005	Hastings Ward	30	Hastings District	06	Hawke's Bay Region	2.83855e+06	6.16604e+06	1	1482300	10	1222	61	3
432700	60	514102	Auckland Central West	704	Hobson Ward	7	Auckland City	02	Auckland Region	2.66696e+06	6.4821e+06	1	432700	7	1001	21	2
1481800	78	547900	Raureka	3005	Hastings Ward	30	Hastings District	06	Hawke's Bay Region	2.83812e+06	6.16655e+06	1	1481800	10	1295	35	3
1481200	174	547900	Raureka	3005	Hastings Ward	30	Hastings District	06	Hawke's Bay Region	2.83784e+06	6.167e+06	1	1481200	10	1245	78	3
432900	135	514101	Auckland Harbourside	704	Hobson Ward	7	Auckland City	02	Auckland Region	2.6679e+06	6.48259e+06	1	432900	7	1023	47	2
433401	9	514102	Auckland Central West	704	Hobson Ward	7	Auckland City	02	Auckland Region	2.66763e+06	6.48228e+06	1	433401	10	1152	4	3
957200	87	527131	Tamahere-Tauwhare	1311	Tamahere Ward	13	Waikato District	03	Waikato Region	2.72323e+06	6.37364e+06	1	957200	1	888	29	1
433200	201	514102	Auckland Central West	704	Hobson Ward	7	Auckland City	02	Auckland Region	2.66787e+06	6.48246e+06	1	433200	10	1168	90	3
2792200	54	599500	Seaview	6404	Timaru Ward	64	Timaru District	13	Canterbury Region	2.37018e+06	5.64433e+06	1	2792200	6	989	19	2
2792300	27	599500	Seaview	6404	Timaru Ward	64	Timaru District	13	Canterbury Region	2.37035e+06	5.64433e+06	1	2792300	8	1061	12	3
2793000	15	599500	Seaview	6404	Timaru Ward	64	Timaru District	13	Canterbury Region	2.37092e+06	5.64425e+06	1	2793000	8	1061	7	3
433302	258	514102	Auckland Central West	704	Hobson Ward	7	Auckland City	02	Auckland Region	2.66751e+06	6.48231e+06	1	433302	7	1010	90	2
432600	312	514102	Auckland Central West	704	Hobson Ward	7	Auckland City	02	Auckland Region	2.66725e+06	6.48238e+06	1	432600	7	1008	109	2
3185400	24	612740	Fairfax	7305	Riverton Ward	73	Southland District	15	Southland Region	2.13202e+06	5.422e+06	1	3185400	5	960	8	2
432800	15	514101	Auckland Harbourside	704	Hobson Ward	7	Auckland City	02	Auckland Region	2.66778e+06	6.48274e+06	1	432800	10	1188	7	3
1481300	132	547900	Raureka	3005	Hastings Ward	30	Hastings District	06	Hawke's Bay Region	2.83778e+06	6.16681e+06	1	1481300	10	1285	59	3
957902	135	527131	Tamahere-Tauwhare	1307	Eureka Ward	13	Waikato District	03	Waikato Region	2.72551e+06	6.37387e+06	1	957902	6	979	47	2
433006	57	514101	Auckland Harbourside	704	Hobson Ward	7	Auckland City	02	Auckland Region	2.66749e+06	6.48269e+06	1	433006	1	888	19	1
433700	93	514102	Auckland Central West	704	Hobson Ward	7	Auckland City	02	Auckland Region	2.6673e+06	6.48217e+06	1	433700	9	1100	42	3
1481500	48	547900	Raureka	3005	Hastings Ward	30	Hastings District	06	Hawke's Bay Region	2.83802e+06	6.16674e+06	1	1481500	7	1019	17	2
2795700	33	599500	Seaview	6404	Timaru Ward	64	Timaru District	13	Canterbury Region	2.37075e+06	5.64392e+06	1	2795700	10	1145	15	3
2795400	9	599500	Seaview	6404	Timaru Ward	64	Timaru District	13	Canterbury Region	2.37084e+06	5.644e+06	1	2795400	10	1145	4	3
2795500	9	599500	Seaview	6404	Timaru Ward	64	Timaru District	13	Canterbury Region	2.37098e+06	5.64405e+06	1	2795500	10	1145	4	3
435700	15	514102	Auckland Central West	704	Hobson Ward	7	Auckland City	02	Auckland Region	2.66731e+06	6.4812e+06	1	435700	5	958	5	2
567300	27	518600	Royal Oak	706	Tamaki-Maungakiekie Ward	7	Auckland City	02	Auckland Region	2.66849e+06	6.47531e+06	1	567300	2	911	9	1
436203	120	514103	Auckland Central East	704	Hobson Ward	7	Auckland City	02	Auckland Region	2.66755e+06	6.4813e+06	1	436203	10	1274	54	3
960200	90	527132	Hautapu	1703	Maungatautari Ward	17	Waipa District	03	Waikato Region	2.72635e+06	6.36722e+06	1	960200	3	928	30	1
436600	342	514103	Auckland Central East	704	Hobson Ward	7	Auckland City	02	Auckland Region	2.66777e+06	6.48168e+06	1	436600	10	1158	154	3
436700	93	514103	Auckland Central East	704	Hobson Ward	7	Auckland City	02	Auckland Region	2.66789e+06	6.48169e+06	1	436700	10	1175	42	3
436900	942	514103	Auckland Central East	704	Hobson Ward	7	Auckland City	02	Auckland Region	2.66794e+06	6.48153e+06	1	436900	10	1265	424	3
3058500	45	610250	South Gore	7403	Gore Ward	74	Gore District	15	Southland Region	2.19595e+06	5.4479e+06	1	3058500	7	999	16	2
3058100	96	610250	South Gore	7403	Gore Ward	74	Gore District	15	Southland Region	2.19593e+06	5.44805e+06	1	3058100	7	999	34	2
3058000	69	610250	South Gore	7403	Gore Ward	74	Gore District	15	Southland Region	2.19573e+06	5.44801e+06	1	3058000	2	908	23	1
566600	90	518600	Royal Oak	706	Tamaki-Maungakiekie Ward	7	Auckland City	02	Auckland Region	2.66836e+06	6.47595e+06	1	566600	3	934	30	1
172502	186	505802	Red Beach	403	Eastern Ward	4	Rodney District	02	Auckland Region	2.66192e+06	6.50962e+06	1	172502	4	941	65	2
435202	27	514102	Auckland Central West	704	Hobson Ward	7	Auckland City	02	Auckland Region	2.66745e+06	6.48153e+06	1	435202	1	894	9	1
434000	24	514102	Auckland Central West	704	Hobson Ward	7	Auckland City	02	Auckland Region	2.66774e+06	6.48201e+06	1	434000	1	894	8	1
435300	9	514102	Auckland Central West	704	Hobson Ward	7	Auckland City	02	Auckland Region	2.66739e+06	6.48148e+06	1	435300	5	958	3	2
435400	15	514102	Auckland Central West	704	Hobson Ward	7	Auckland City	02	Auckland Region	2.66729e+06	6.48134e+06	1	435400	5	958	5	2
2793900	57	599500	Seaview	6404	Timaru Ward	64	Timaru District	13	Canterbury Region	2.37027e+06	5.64423e+06	1	2793900	9	1092	26	3
3187600	69	612730	Te Waewae	7305	Riverton Ward	73	Southland District	15	Southland Region	2.11822e+06	5.41603e+06	1	3187600	4	939	24	2
434403	180	514102	Auckland Central West	704	Hobson Ward	7	Auckland City	02	Auckland Region	2.66712e+06	6.48171e+06	1	434403	7	1001	63	2
1482500	168	547900	Raureka	3005	Hastings Ward	30	Hastings District	06	Hawke's Bay Region	2.83878e+06	6.1658e+06	1	1482500	4	952	59	2
433900	54	514102	Auckland Central West	704	Hobson Ward	7	Auckland City	02	Auckland Region	2.66767e+06	6.48208e+06	1	433900	1	894	18	1
435100	48	514102	Auckland Central West	704	Hobson Ward	7	Auckland City	02	Auckland Region	2.66727e+06	6.48145e+06	1	435100	10	1353	22	3
435201	99	514102	Auckland Central West	704	Hobson Ward	7	Auckland City	02	Auckland Region	2.66756e+06	6.48153e+06	1	435201	9	1109	45	3
434500	213	514102	Auckland Central West	704	Hobson Ward	7	Auckland City	02	Auckland Region	2.66725e+06	6.4818e+06	1	434500	10	1204	96	3
434601	57	514102	Auckland Central West	704	Hobson Ward	7	Auckland City	02	Auckland Region	2.6672e+06	6.48178e+06	1	434601	8	1059	26	3
959101	135	527501	Cambridge North	1703	Maungatautari Ward	17	Waipa District	03	Waikato Region	2.7288e+06	6.36589e+06	1	959101	1	888	45	1
959800	204	527132	Hautapu	1703	Maungatautari Ward	17	Waipa District	03	Waikato Region	2.72491e+06	6.36786e+06	1	959800	4	935	71	2
172601	144	505802	Red Beach	403	Eastern Ward	4	Rodney District	02	Auckland Region	2.6616e+06	6.5096e+06	1	172601	4	942	50	2
2794600	102	599500	Seaview	6404	Timaru Ward	64	Timaru District	13	Canterbury Region	2.37001e+06	5.64383e+06	1	2794600	6	978	36	2
2794500	111	599500	Seaview	6404	Timaru Ward	64	Timaru District	13	Canterbury Region	2.36988e+06	5.64388e+06	1	2794500	9	1104	50	3
2794700	96	599500	Seaview	6404	Timaru Ward	64	Timaru District	13	Canterbury Region	2.37018e+06	5.64388e+06	1	2794700	7	1020	34	2
435000	189	514102	Auckland Central West	704	Hobson Ward	7	Auckland City	02	Auckland Region	2.66743e+06	6.48159e+06	1	435000	10	1353	85	3
3187902	9	612730	Te Waewae	7305	Riverton Ward	73	Southland District	15	Southland Region	2.12673e+06	5.41473e+06	1	3187902	6	980	3	2
566400	117	518600	Royal Oak	704	Hobson Ward	7	Auckland City	02	Auckland Region	2.66843e+06	6.47622e+06	1	566400	7	1002	41	2
172802	282	505802	Red Beach	403	Eastern Ward	4	Rodney District	02	Auckland Region	2.66143e+06	6.50853e+06	1	172802	2	917	93	1
3187904	111	612802	Riverton West	7305	Riverton Ward	73	Southland District	15	Southland Region	2.12751e+06	5.41425e+06	1	3187904	8	1041	50	3
434101	204	514102	Auckland Central West	704	Hobson Ward	7	Auckland City	02	Auckland Region	2.66734e+06	6.48204e+06	1	434101	9	1102	92	3
172703	141	505802	Red Beach	403	Eastern Ward	4	Rodney District	02	Auckland Region	2.66187e+06	6.50943e+06	1	172703	8	1049	63	3
171903	135	505805	Orewa	403	Eastern Ward	4	Rodney District	02	Auckland Region	2.66151e+06	6.51055e+06	1	171903	1	882	45	1
434602	228	514102	Auckland Central West	704	Hobson Ward	7	Auckland City	02	Auckland Region	2.66724e+06	6.48171e+06	1	434602	8	1059	103	3
434802	81	514102	Auckland Central West	704	Hobson Ward	7	Auckland City	02	Auckland Region	2.66725e+06	6.48159e+06	1	434802	9	1130	36	3
2793800	114	599500	Seaview	6404	Timaru Ward	64	Timaru District	13	Canterbury Region	2.37003e+06	5.64426e+06	1	2793800	9	1095	51	3
434200	126	514102	Auckland Central West	704	Hobson Ward	7	Auckland City	02	Auckland Region	2.66746e+06	6.48192e+06	1	434200	9	1109	57	3
172201	252	505805	Orewa	403	Eastern Ward	4	Rodney District	02	Auckland Region	2.66227e+06	6.5109e+06	1	172201	9	1089	113	3
434801	66	514102	Auckland Central West	704	Hobson Ward	7	Auckland City	02	Auckland Region	2.66731e+06	6.48164e+06	1	434801	9	1130	30	3
172202	153	505805	Orewa	403	Eastern Ward	4	Rodney District	02	Auckland Region	2.66218e+06	6.51076e+06	1	172202	7	1008	54	2
434701	123	514102	Auckland Central West	704	Hobson Ward	7	Auckland City	02	Auckland Region	2.66733e+06	6.48173e+06	1	434701	9	1130	55	3
172100	441	505805	Orewa	403	Eastern Ward	4	Rodney District	02	Auckland Region	2.66216e+06	6.51122e+06	1	172100	7	1021	154	2
2793600	6	599500	Seaview	6404	Timaru Ward	64	Timaru District	13	Canterbury Region	2.37107e+06	5.64404e+06	1	2793600	8	1061	3	3
2794000	102	599500	Seaview	6404	Timaru Ward	64	Timaru District	13	Canterbury Region	2.36988e+06	5.64407e+06	1	2794000	9	1092	46	3
172605	96	505802	Red Beach	403	Eastern Ward	4	Rodney District	02	Auckland Region	2.66144e+06	6.50908e+06	1	172605	3	927	32	1
171802	297	505805	Orewa	403	Eastern Ward	4	Rodney District	02	Auckland Region	2.66171e+06	6.51099e+06	1	171802	7	1010	104	2
435203	258	514102	Auckland Central West	704	Hobson Ward	7	Auckland City	02	Auckland Region	2.66741e+06	6.48132e+06	1	435203	9	1131	116	3
172300	177	505805	Orewa	403	Eastern Ward	4	Rodney District	02	Auckland Region	2.66213e+06	6.51043e+06	1	172300	7	1025	62	2
434102	1431	514102	Auckland Central West	704	Hobson Ward	7	Auckland City	02	Auckland Region	2.66732e+06	6.48193e+06	1	434102	10	1189	644	3
434702	96	514102	Auckland Central West	704	Hobson Ward	7	Auckland City	02	Auckland Region	2.66731e+06	6.48174e+06	1	434702	9	1130	43	3
959104	147	527501	Cambridge North	1703	Maungatautari Ward	17	Waipa District	03	Waikato Region	2.72898e+06	6.36589e+06	1	959104	1	878	49	1
959102	84	527501	Cambridge North	1703	Maungatautari Ward	17	Waipa District	03	Waikato Region	2.72878e+06	6.36618e+06	1	959102	1	874	28	1
172501	108	505802	Red Beach	403	Eastern Ward	4	Rodney District	02	Auckland Region	2.66177e+06	6.5097e+06	1	172501	4	942	38	2
438214	261	514101	Auckland Harbourside	704	Hobson Ward	7	Auckland City	02	Auckland Region	2.6689e+06	6.48228e+06	1	438214	6	982	91	2
3190800	18	612801	Riverton East	7305	Riverton Ward	73	Southland District	15	Southland Region	2.12632e+06	5.417e+06	1	3190800	9	1089	8	3
3190700	72	612801	Riverton East	7305	Riverton Ward	73	Southland District	15	Southland Region	2.12665e+06	5.41724e+06	1	3190700	8	1035	32	3
3190600	36	612801	Riverton East	7305	Riverton Ward	73	Southland District	15	Southland Region	2.12656e+06	5.41727e+06	1	3190600	8	1035	16	3
176502	411	505802	Red Beach	403	Eastern Ward	4	Rodney District	02	Auckland Region	2.66106e+06	6.50886e+06	1	176502	1	878	136	1
1487000	219	547700	St Leonards	3005	Hastings Ward	30	Hastings District	06	Hawke's Bay Region	2.83879e+06	6.16714e+06	1	1487000	7	1005	77	2
1486000	99	547700	St Leonards	3005	Hastings Ward	30	Hastings District	06	Hawke's Bay Region	2.83895e+06	6.16782e+06	1	1486000	9	1078	45	3
1486300	153	547700	St Leonards	3005	Hastings Ward	30	Hastings District	06	Hawke's Bay Region	2.83946e+06	6.16785e+06	1	1486300	6	989	54	2
1486100	99	547700	St Leonards	3005	Hastings Ward	30	Hastings District	06	Hawke's Bay Region	2.83916e+06	6.16789e+06	1	1486100	10	1300	45	3
962500	186	527501	Cambridge North	1702	Cambridge Ward	17	Waipa District	03	Waikato Region	2.72718e+06	6.36564e+06	1	962500	3	927	61	1
961600	156	527501	Cambridge North	1702	Cambridge Ward	17	Waipa District	03	Waikato Region	2.72773e+06	6.36562e+06	1	961600	2	912	51	1
961500	147	527501	Cambridge North	1702	Cambridge Ward	17	Waipa District	03	Waikato Region	2.72751e+06	6.3656e+06	1	961500	5	960	51	2
962000	69	527503	Cambridge Central	1702	Cambridge Ward	17	Waipa District	03	Waikato Region	2.72832e+06	6.36566e+06	1	962000	6	977	24	2
438103	18	514101	Auckland Harbourside	704	Hobson Ward	7	Auckland City	02	Auckland Region	2.6682e+06	6.4826e+06	1	438103	8	1060	8	3
438408	327	514103	Auckland Central East	704	Hobson Ward	7	Auckland City	02	Auckland Region	2.66851e+06	6.48212e+06	1	438408	7	1030	114	2
3189800	102	612802	Riverton West	7305	Riverton Ward	73	Southland District	15	Southland Region	2.12574e+06	5.41633e+06	1	3189800	6	996	36	2
3191100	18	612801	Riverton East	7305	Riverton Ward	73	Southland District	15	Southland Region	2.12619e+06	5.41672e+06	1	3191100	9	1089	8	3
3189700	90	612802	Riverton West	7305	Riverton Ward	73	Southland District	15	Southland Region	2.12545e+06	5.41644e+06	1	3189700	4	937	31	2
1486400	72	547700	St Leonards	3005	Hastings Ward	30	Hastings District	06	Hawke's Bay Region	2.8393e+06	6.16773e+06	1	1486400	8	1067	32	3
1486600	15	547700	St Leonards	3005	Hastings Ward	30	Hastings District	06	Hawke's Bay Region	2.83873e+06	6.16775e+06	1	1486600	7	1008	5	2
438210	3	514101	Auckland Harbourside	704	Hobson Ward	7	Auckland City	02	Auckland Region	2.6686e+06	6.48262e+06	1	438210	6	982	1	2
438213	150	514101	Auckland Harbourside	704	Hobson Ward	7	Auckland City	02	Auckland Region	2.66846e+06	6.48248e+06	1	438213	5	956	52	2
438203	30	514103	Auckland Central East	704	Hobson Ward	7	Auckland City	02	Auckland Region	2.66862e+06	6.4819e+06	1	438203	8	1059	14	3
436400	291	514103	Auckland Central East	704	Hobson Ward	7	Auckland City	02	Auckland Region	2.66752e+06	6.4812e+06	1	436400	9	1132	131	3
436202	138	514103	Auckland Central East	704	Hobson Ward	7	Auckland City	02	Auckland Region	2.66762e+06	6.48133e+06	1	436202	10	1184	62	3
961300	132	527501	Cambridge North	1702	Cambridge Ward	17	Waipa District	03	Waikato Region	2.72793e+06	6.36609e+06	1	961300	6	991	46	2
961200	129	527501	Cambridge North	1702	Cambridge Ward	17	Waipa District	03	Waikato Region	2.72772e+06	6.36608e+06	1	961200	4	940	45	2
961400	234	527501	Cambridge North	1702	Cambridge Ward	17	Waipa District	03	Waikato Region	2.72828e+06	6.36609e+06	1	961400	4	946	82	2
961100	195	527501	Cambridge North	1702	Cambridge Ward	17	Waipa District	03	Waikato Region	2.72749e+06	6.366e+06	1	961100	5	954	68	2
437102	123	514103	Auckland Central East	704	Hobson Ward	7	Auckland City	02	Auckland Region	2.66789e+06	6.48199e+06	1	437102	8	1044	55	3
435600	282	514102	Auckland Central West	704	Hobson Ward	7	Auckland City	02	Auckland Region	2.66713e+06	6.48121e+06	1	435600	6	988	99	2
437101	42	514103	Auckland Central East	704	Hobson Ward	7	Auckland City	02	Auckland Region	2.66782e+06	6.48201e+06	1	437101	8	1044	19	3
566800	267	518600	Royal Oak	706	Tamaki-Maungakiekie Ward	7	Auckland City	02	Auckland Region	2.66844e+06	6.47576e+06	1	566800	2	902	88	1
2795900	24	599500	Seaview	6404	Timaru Ward	64	Timaru District	13	Canterbury Region	2.37104e+06	5.64387e+06	1	2795900	10	1145	11	3
2795600	3	599500	Seaview	6404	Timaru Ward	64	Timaru District	13	Canterbury Region	2.37064e+06	5.64387e+06	1	2795600	10	1145	1	3
2795800	15	599500	Seaview	6404	Timaru Ward	64	Timaru District	13	Canterbury Region	2.37089e+06	5.64384e+06	1	2795800	10	1145	7	3
436300	315	514103	Auckland Central East	704	Hobson Ward	7	Auckland City	02	Auckland Region	2.66773e+06	6.48131e+06	1	436300	10	1202	142	3
3057800	66	610240	West Gore	7403	Gore Ward	74	Gore District	15	Southland Region	2.19546e+06	5.44814e+06	1	3057800	2	908	22	1
436001	93	514102	Auckland Central West	701	Western Bays Ward	7	Auckland City	02	Auckland Region	2.6669e+06	6.48114e+06	1	436001	8	1062	42	3
437000	369	514103	Auckland Central East	704	Hobson Ward	7	Auckland City	02	Auckland Region	2.66784e+06	6.48143e+06	1	437000	10	1286	166	3
436500	33	514103	Auckland Central East	704	Hobson Ward	7	Auckland City	02	Auckland Region	2.66763e+06	6.48116e+06	1	436500	9	1132	15	3
2794900	3	599500	Seaview	6404	Timaru Ward	64	Timaru District	13	Canterbury Region	2.37051e+06	5.64427e+06	1	2794900	10	1145	1	3
436801	138	514103	Auckland Central East	704	Hobson Ward	7	Auckland City	02	Auckland Region	2.66778e+06	6.4815e+06	1	436801	10	1296	62	3
960001	195	527132	Hautapu	1703	Maungatautari Ward	17	Waipa District	03	Waikato Region	2.72513e+06	6.3659e+06	1	960001	4	939	68	2
959900	243	527132	Hautapu	1703	Maungatautari Ward	17	Waipa District	03	Waikato Region	2.72363e+06	6.36637e+06	1	959900	3	924	80	1
961000	165	527131	Tamahere-Tauwhare	1311	Tamahere Ward	13	Waikato District	03	Waikato Region	2.72034e+06	6.36801e+06	1	961000	2	902	54	1
436802	408	514103	Auckland Central East	704	Hobson Ward	7	Auckland City	02	Auckland Region	2.66785e+06	6.48151e+06	1	436802	10	1222	184	3
436100	12	514103	Auckland Central East	704	Hobson Ward	7	Auckland City	02	Auckland Region	2.66767e+06	6.48151e+06	1	436100	8	1059	5	3
2795300	3	599500	Seaview	6404	Timaru Ward	64	Timaru District	13	Canterbury Region	2.37077e+06	5.64414e+06	1	2795300	10	1145	1	3
2795100	12	599500	Seaview	6404	Timaru Ward	64	Timaru District	13	Canterbury Region	2.37052e+06	5.64407e+06	1	2795100	10	1145	5	3
435801	15	514102	Auckland Central West	704	Hobson Ward	7	Auckland City	02	Auckland Region	2.66736e+06	6.48123e+06	1	435801	5	958	5	2
960002	114	527502	Cambridge West	1703	Maungatautari Ward	17	Waipa District	03	Waikato Region	2.72588e+06	6.36535e+06	1	960002	6	988	40	2
435900	120	514102	Auckland Central West	704	Hobson Ward	7	Auckland City	02	Auckland Region	2.66748e+06	6.48132e+06	1	435900	5	958	42	2
436201	240	514103	Auckland Central East	704	Hobson Ward	7	Auckland City	02	Auckland Region	2.66758e+06	6.48136e+06	1	436201	10	1193	108	3
435802	378	514102	Auckland Central West	704	Hobson Ward	7	Auckland City	02	Auckland Region	2.66744e+06	6.48122e+06	1	435802	10	1230	170	3
1489200	90	548200	Hastings Central	3005	Hastings Ward	30	Hastings District	06	Hawke's Bay Region	2.83917e+06	6.16647e+06	1	1489200	5	957	31	2
3060400	102	610230	Central Gore	7403	Gore Ward	74	Gore District	15	Southland Region	2.19572e+06	5.44835e+06	1	3060400	8	1059	46	3
3060500	63	610230	Central Gore	7403	Gore Ward	74	Gore District	15	Southland Region	2.196e+06	5.44832e+06	1	3060500	4	945	22	2
3060300	90	610230	Central Gore	7403	Gore Ward	74	Gore District	15	Southland Region	2.1958e+06	5.44849e+06	1	3060300	4	945	31	2
1487700	114	547700	St Leonards	3005	Hastings Ward	30	Hastings District	06	Hawke's Bay Region	2.83914e+06	6.16708e+06	1	1487700	9	1116	51	3
963500	162	527502	Cambridge West	1702	Cambridge Ward	17	Waipa District	03	Waikato Region	2.72634e+06	6.36555e+06	1	963500	4	948	57	2
963800	87	527502	Cambridge West	1702	Cambridge Ward	17	Waipa District	03	Waikato Region	2.72694e+06	6.36558e+06	1	963800	3	933	29	1
963600	144	527502	Cambridge West	1702	Cambridge Ward	17	Waipa District	03	Waikato Region	2.72658e+06	6.36556e+06	1	963600	4	949	50	2
440300	3	514301	Grafton West	704	Hobson Ward	7	Auckland City	02	Auckland Region	2.66837e+06	6.48155e+06	1	440300	10	1309	1	3
1487500	174	547700	St Leonards	3005	Hastings Ward	30	Hastings District	06	Hawke's Bay Region	2.83888e+06	6.16701e+06	1	1487500	6	997	61	2
440600	270	514301	Grafton West	704	Hobson Ward	7	Auckland City	02	Auckland Region	2.66794e+06	6.48132e+06	1	440600	9	1098	122	3
1488400	111	547700	St Leonards	3005	Hastings Ward	30	Hastings District	06	Hawke's Bay Region	2.83968e+06	6.1677e+06	1	1488400	6	976	39	2
3061800	45	610210	North Gore	7403	Gore Ward	74	Gore District	15	Southland Region	2.19596e+06	5.4493e+06	1	3061800	1	890	15	1
964000	123	527502	Cambridge West	1702	Cambridge Ward	17	Waipa District	03	Waikato Region	2.72634e+06	6.3653e+06	1	964000	8	1064	55	3
963700	99	527502	Cambridge West	1702	Cambridge Ward	17	Waipa District	03	Waikato Region	2.72658e+06	6.3653e+06	1	963700	3	933	33	1
964400	117	527502	Cambridge West	1702	Cambridge Ward	17	Waipa District	03	Waikato Region	2.72705e+06	6.36506e+06	1	964400	9	1082	53	3
175903	330	506300	Dairy Flat-Redvale	402	Western Ward	4	Rodney District	02	Auckland Region	2.65764e+06	6.5037e+06	1	175903	1	897	109	1
2798900	63	599700	Parkside	6404	Timaru Ward	64	Timaru District	13	Canterbury Region	2.37034e+06	5.64371e+06	1	2798900	10	1153	28	3
2798800	81	599700	Parkside	6404	Timaru Ward	64	Timaru District	13	Canterbury Region	2.37017e+06	5.64364e+06	1	2798800	6	979	28	2
2799300	15	599700	Parkside	6404	Timaru Ward	64	Timaru District	13	Canterbury Region	2.37102e+06	5.6437e+06	1	2799300	8	1071	7	3
2799200	63	599700	Parkside	6404	Timaru Ward	64	Timaru District	13	Canterbury Region	2.37067e+06	5.6437e+06	1	2799200	10	1145	28	3
2798400	126	599700	Parkside	6404	Timaru Ward	64	Timaru District	13	Canterbury Region	2.36989e+06	5.64364e+06	1	2798400	8	1057	57	3
438301	18	514103	Auckland Central East	704	Hobson Ward	7	Auckland City	02	Auckland Region	2.66844e+06	6.48238e+06	1	438301	8	1059	8	3
3190100	120	612802	Riverton West	7305	Riverton Ward	73	Southland District	15	Southland Region	2.12658e+06	5.41588e+06	1	3190100	3	919	40	1
3190000	162	612802	Riverton West	7305	Riverton Ward	73	Southland District	15	Southland Region	2.12613e+06	5.41594e+06	1	3190000	4	938	57	2
438209	243	514101	Auckland Harbourside	704	Hobson Ward	7	Auckland City	02	Auckland Region	2.66783e+06	6.48298e+06	1	438209	6	982	85	2
438501	39	514103	Auckland Central East	704	Hobson Ward	7	Auckland City	02	Auckland Region	2.6683e+06	6.48225e+06	1	438501	7	1022	14	2
175400	18	506000	Silverdale South	403	Eastern Ward	4	Rodney District	02	Auckland Region	2.66042e+06	6.50801e+06	1	175400	6	978	6	2
438107	276	514103	Auckland Central East	704	Hobson Ward	7	Auckland City	02	Auckland Region	2.66828e+06	6.48244e+06	1	438107	8	1031	124	3
1486800	201	547700	St Leonards	3005	Hastings Ward	30	Hastings District	06	Hawke's Bay Region	2.83879e+06	6.16741e+06	1	1486800	7	1014	70	2
1487300	108	547700	St Leonards	3005	Hastings Ward	30	Hastings District	06	Hawke's Bay Region	2.83918e+06	6.16761e+06	1	1487300	6	990	38	2
438600	144	514103	Auckland Central East	704	Hobson Ward	7	Auckland City	02	Auckland Region	2.6684e+06	6.48212e+06	1	438600	5	973	50	2
437600	147	514103	Auckland Central East	704	Hobson Ward	7	Auckland City	02	Auckland Region	2.66791e+06	6.48228e+06	1	437600	9	1095	66	3
438305	303	514103	Auckland Central East	704	Hobson Ward	7	Auckland City	02	Auckland Region	2.66859e+06	6.48203e+06	1	438305	10	1298	136	3
3190201	87	612802	Riverton West	7305	Riverton Ward	73	Southland District	15	Southland Region	2.12624e+06	5.41538e+06	1	3190201	5	959	30	2
438404	102	514103	Auckland Central East	704	Hobson Ward	7	Auckland City	02	Auckland Region	2.66834e+06	6.48243e+06	1	438404	5	973	36	2
1486900	18	547700	St Leonards	3005	Hastings Ward	30	Hastings District	06	Hawke's Bay Region	2.83886e+06	6.16741e+06	1	1486900	7	1014	6	2
1487100	93	547700	St Leonards	3005	Hastings Ward	30	Hastings District	06	Hawke's Bay Region	2.83894e+06	6.16734e+06	1	1487100	4	953	33	2
962200	294	527501	Cambridge North	1702	Cambridge Ward	17	Waipa District	03	Waikato Region	2.72713e+06	6.36606e+06	1	962200	4	939	103	2
3190500	66	612801	Riverton East	7305	Riverton Ward	73	Southland District	15	Southland Region	2.12696e+06	5.41765e+06	1	3190500	8	1035	30	3
3190400	12	612801	Riverton East	7305	Riverton Ward	73	Southland District	15	Southland Region	2.12667e+06	5.41769e+06	1	3190400	9	1089	5	3
437700	240	514103	Auckland Central East	704	Hobson Ward	7	Auckland City	02	Auckland Region	2.66798e+06	6.48226e+06	1	437700	7	1026	84	2
437200	3	514103	Auckland Central East	704	Hobson Ward	7	Auckland City	02	Auckland Region	2.66813e+06	6.48205e+06	1	437200	8	1044	1	3
3059600	48	610240	West Gore	7403	Gore Ward	74	Gore District	15	Southland Region	2.19554e+06	5.44844e+06	1	3059600	7	1008	17	2
3060200	120	610230	Central Gore	7403	Gore Ward	74	Gore District	15	Southland Region	2.19586e+06	5.44857e+06	1	3060200	2	914	40	1
1486200	156	547700	St Leonards	3005	Hastings Ward	30	Hastings District	06	Hawke's Bay Region	2.83933e+06	6.16799e+06	1	1486200	10	1181	70	3
1487200	93	547700	St Leonards	3005	Hastings Ward	30	Hastings District	06	Hawke's Bay Region	2.83909e+06	6.16729e+06	1	1487200	4	953	33	2
1485900	78	547700	St Leonards	3005	Hastings Ward	30	Hastings District	06	Hawke's Bay Region	2.83903e+06	6.16802e+06	1	1485900	8	1067	35	3
961700	216	527501	Cambridge North	1702	Cambridge Ward	17	Waipa District	03	Waikato Region	2.72794e+06	6.36578e+06	1	961700	4	949	76	2
962100	132	527501	Cambridge North	1702	Cambridge Ward	17	Waipa District	03	Waikato Region	2.72772e+06	6.36586e+06	1	962100	6	977	46	2
961900	177	527501	Cambridge North	1702	Cambridge Ward	17	Waipa District	03	Waikato Region	2.72839e+06	6.36586e+06	1	961900	6	980	62	2
961800	180	527501	Cambridge North	1702	Cambridge Ward	17	Waipa District	03	Waikato Region	2.72817e+06	6.36585e+06	1	961800	7	1003	63	2
962400	138	527501	Cambridge North	1702	Cambridge Ward	17	Waipa District	03	Waikato Region	2.72728e+06	6.36584e+06	1	962400	5	959	48	2
962300	129	527501	Cambridge North	1702	Cambridge Ward	17	Waipa District	03	Waikato Region	2.72706e+06	6.36583e+06	1	962300	8	1042	58	3
175600	39	506000	Silverdale South	403	Eastern Ward	4	Rodney District	02	Auckland Region	2.66026e+06	6.50748e+06	1	175600	4	941	14	2
3191300	156	612801	Riverton East	7305	Riverton Ward	73	Southland District	15	Southland Region	2.12647e+06	5.41669e+06	1	3191300	9	1073	70	3
3190900	18	612801	Riverton East	7305	Riverton Ward	73	Southland District	15	Southland Region	2.12637e+06	5.41695e+06	1	3190900	9	1089	8	3
3191000	6	612801	Riverton East	7305	Riverton Ward	73	Southland District	15	Southland Region	2.12618e+06	5.41683e+06	1	3191000	9	1089	3	3
438503	180	514103	Auckland Central East	704	Hobson Ward	7	Auckland City	02	Auckland Region	2.66832e+06	6.48214e+06	1	438503	7	1022	63	2
438302	18	514103	Auckland Central East	704	Hobson Ward	7	Auckland City	02	Auckland Region	2.66858e+06	6.48223e+06	1	438302	8	1059	8	3
438106	3	514103	Auckland Central East	704	Hobson Ward	7	Auckland City	02	Auckland Region	2.66813e+06	6.48239e+06	1	438106	8	1031	1	3
962601	177	527503	Cambridge Central	1702	Cambridge Ward	17	Waipa District	03	Waikato Region	2.72722e+06	6.36546e+06	1	962601	7	1025	62	2
963100	66	527503	Cambridge Central	1702	Cambridge Ward	17	Waipa District	03	Waikato Region	2.72793e+06	6.36494e+06	1	963100	9	1099	30	3
438303	78	514103	Auckland Central East	704	Hobson Ward	7	Auckland City	02	Auckland Region	2.66852e+06	6.48223e+06	1	438303	8	1059	35	3
438402	183	514103	Auckland Central East	704	Hobson Ward	7	Auckland City	02	Auckland Region	2.6684e+06	6.48233e+06	1	438402	9	1082	82	3
437900	159	514101	Auckland Harbourside	704	Hobson Ward	7	Auckland City	02	Auckland Region	2.66804e+06	6.48264e+06	1	437900	8	1064	72	3
438215	36	514101	Auckland Harbourside	704	Hobson Ward	7	Auckland City	02	Auckland Region	2.66871e+06	6.48226e+06	1	438215	5	956	13	2
3189900	63	612802	Riverton West	7305	Riverton Ward	73	Southland District	15	Southland Region	2.12582e+06	5.41596e+06	1	3189900	4	937	22	2
438000	108	514103	Auckland Central East	704	Hobson Ward	7	Auckland City	02	Auckland Region	2.66798e+06	6.48251e+06	1	438000	8	1060	49	3
438206	156	514101	Auckland Harbourside	704	Hobson Ward	7	Auckland City	02	Auckland Region	2.66886e+06	6.48205e+06	1	438206	4	953	55	2
1486500	39	547700	St Leonards	3005	Hastings Ward	30	Hastings District	06	Hawke's Bay Region	2.83866e+06	6.16754e+06	1	1486500	7	1008	14	2
1486700	93	547700	St Leonards	3005	Hastings Ward	30	Hastings District	06	Hawke's Bay Region	2.83879e+06	6.16766e+06	1	1486700	7	1008	33	2
1487400	84	547700	St Leonards	3005	Hastings Ward	30	Hastings District	06	Hawke's Bay Region	2.8391e+06	6.16771e+06	1	1487400	6	990	29	2
962900	33	527503	Cambridge Central	1702	Cambridge Ward	17	Waipa District	03	Waikato Region	2.72753e+06	6.36488e+06	1	962900	9	1099	15	3
962700	3	527503	Cambridge Central	1702	Cambridge Ward	17	Waipa District	03	Waikato Region	2.72732e+06	6.36485e+06	1	962700	9	1099	1	3
438407	369	514103	Auckland Central East	704	Hobson Ward	7	Auckland City	02	Auckland Region	2.66845e+06	6.4822e+06	1	438407	10	1154	166	3
438102	3	514103	Auckland Central East	704	Hobson Ward	7	Auckland City	02	Auckland Region	2.66795e+06	6.48243e+06	1	438102	8	1060	1	3
962800	3	527503	Cambridge Central	1702	Cambridge Ward	17	Waipa District	03	Waikato Region	2.72737e+06	6.36469e+06	1	962800	9	1099	1	3
963000	30	527503	Cambridge Central	1702	Cambridge Ward	17	Waipa District	03	Waikato Region	2.72751e+06	6.36467e+06	1	963000	9	1099	14	3
437800	144	514103	Auckland Central East	704	Hobson Ward	7	Auckland City	02	Auckland Region	2.66821e+06	6.48229e+06	1	437800	8	1061	65	3
3190300	60	612801	Riverton East	7305	Riverton Ward	73	Southland District	15	Southland Region	2.1268e+06	5.41797e+06	1	3190300	8	1035	27	3
438218	3	514101	Auckland Harbourside	704	Hobson Ward	7	Auckland City	02	Auckland Region	2.66769e+06	6.48287e+06	1	438218	6	982	1	2
438405	219	514103	Auckland Central East	704	Hobson Ward	7	Auckland City	02	Auckland Region	2.66835e+06	6.48232e+06	1	438405	9	1121	99	3
176602	6	506200	Silverdale North	403	Eastern Ward	4	Rodney District	02	Auckland Region	2.65978e+06	6.50747e+06	1	176602	3	929	2	1
438406	318	514103	Auckland Central East	704	Hobson Ward	7	Auckland City	02	Auckland Region	2.66849e+06	6.48222e+06	1	438406	10	1166	143	3
3060100	120	610230	Central Gore	7403	Gore Ward	74	Gore District	15	Southland Region	2.19584e+06	5.44867e+06	1	3060100	2	906	40	1
3060000	144	610230	Central Gore	7403	Gore Ward	74	Gore District	15	Southland Region	2.1958e+06	5.44878e+06	1	3060000	4	950	50	2
1489300	48	548200	Hastings Central	3005	Hastings Ward	30	Hastings District	06	Hawke's Bay Region	2.83933e+06	6.16665e+06	1	1489300	9	1131	22	3
966100	207	527504	Leamington West	1702	Cambridge Ward	17	Waipa District	03	Waikato Region	2.72784e+06	6.36361e+06	1	966100	6	986	72	2
965505	15	527505	Leamington East	1702	Cambridge Ward	17	Waipa District	03	Waikato Region	2.7283e+06	6.36383e+06	1	965505	2	900	5	1
966200	192	527505	Leamington East	1702	Cambridge Ward	17	Waipa District	03	Waikato Region	2.72806e+06	6.36353e+06	1	966200	5	964	67	2
442000	93	514302	Grafton East	704	Hobson Ward	7	Auckland City	02	Auckland Region	2.66778e+06	6.48024e+06	1	442000	7	1004	33	2
441300	117	514301	Grafton West	704	Hobson Ward	7	Auckland City	02	Auckland Region	2.66777e+06	6.48072e+06	1	441300	1	897	39	1
1490100	12	548200	Hastings Central	3005	Hastings Ward	30	Hastings District	06	Hawke's Bay Region	2.83946e+06	6.16708e+06	1	1490100	8	1051	5	3
3062400	60	610210	North Gore	7403	Gore Ward	74	Gore District	15	Southland Region	2.19617e+06	5.44947e+06	1	3062400	9	1088	27	3
441800	6	514301	Grafton West	704	Hobson Ward	7	Auckland City	02	Auckland Region	2.66747e+06	6.48032e+06	1	441800	7	1004	2	2
1488700	57	548200	Hastings Central	3005	Hastings Ward	30	Hastings District	06	Hawke's Bay Region	2.83928e+06	6.16691e+06	1	1488700	8	1041	26	3
1487600	120	547700	St Leonards	3005	Hastings Ward	30	Hastings District	06	Hawke's Bay Region	2.83888e+06	6.16687e+06	1	1487600	4	950	42	2
1488100	51	547700	St Leonards	3005	Hastings Ward	30	Hastings District	06	Hawke's Bay Region	2.83939e+06	6.16758e+06	1	1488100	7	1006	18	2
2799800	96	599700	Parkside	6404	Timaru Ward	64	Timaru District	13	Canterbury Region	2.37066e+06	5.6433e+06	1	2799800	9	1085	43	3
2799100	90	599700	Parkside	6404	Timaru Ward	64	Timaru District	13	Canterbury Region	2.37025e+06	5.64338e+06	1	2799100	8	1071	40	3
2799600	69	599700	Parkside	6404	Timaru Ward	64	Timaru District	13	Canterbury Region	2.37072e+06	5.64347e+06	1	2799600	8	1071	31	3
2799700	39	599700	Parkside	6404	Timaru Ward	64	Timaru District	13	Canterbury Region	2.37093e+06	5.64347e+06	1	2799700	8	1071	18	3
1488500	147	548200	Hastings Central	3005	Hastings Ward	30	Hastings District	06	Hawke's Bay Region	2.83897e+06	6.16676e+06	1	1488500	7	1026	51	2
3060800	3	610230	Central Gore	7403	Gore Ward	74	Gore District	15	Southland Region	2.19631e+06	5.4489e+06	1	3060800	8	1071	1	3
1489100	138	548200	Hastings Central	3005	Hastings Ward	30	Hastings District	06	Hawke's Bay Region	2.83923e+06	6.16659e+06	1	1489100	8	1054	62	3
3061300	3	610230	Central Gore	7403	Gore Ward	74	Gore District	15	Southland Region	2.19627e+06	5.44855e+06	1	3061300	8	1071	1	3
3061400	3	610230	Central Gore	7403	Gore Ward	74	Gore District	15	Southland Region	2.19632e+06	5.44849e+06	1	3061400	8	1071	1	3
1487900	33	547700	St Leonards	3005	Hastings Ward	30	Hastings District	06	Hawke's Bay Region	2.83929e+06	6.16731e+06	1	1487900	7	1006	12	2
440500	222	514301	Grafton West	704	Hobson Ward	7	Auckland City	02	Auckland Region	2.66801e+06	6.48144e+06	1	440500	10	1309	100	3
3060600	66	610230	Central Gore	7403	Gore Ward	74	Gore District	15	Southland Region	2.19572e+06	5.44816e+06	1	3060600	8	1059	30	3
3060700	96	610230	Central Gore	7403	Gore Ward	74	Gore District	15	Southland Region	2.19597e+06	5.44818e+06	1	3060700	8	1071	43	3
963900	171	527502	Cambridge West	1702	Cambridge Ward	17	Waipa District	03	Waikato Region	2.7269e+06	6.36531e+06	1	963900	5	973	60	2
1488300	168	547700	St Leonards	3005	Hastings Ward	30	Hastings District	06	Hawke's Bay Region	2.83956e+06	6.16758e+06	1	1488300	7	1001	59	2
176801	90	506200	Silverdale North	402	Western Ward	4	Rodney District	02	Auckland Region	2.65828e+06	6.5058e+06	1	176801	3	933	30	1
964100	198	527502	Cambridge West	1702	Cambridge Ward	17	Waipa District	03	Waikato Region	2.72636e+06	6.36507e+06	1	964100	4	949	69	2
964300	165	527502	Cambridge West	1702	Cambridge Ward	17	Waipa District	03	Waikato Region	2.72684e+06	6.36507e+06	1	964300	8	1070	74	3
964200	108	527502	Cambridge West	1702	Cambridge Ward	17	Waipa District	03	Waikato Region	2.72659e+06	6.36506e+06	1	964200	4	939	38	2
964800	72	527502	Cambridge West	1702	Cambridge Ward	17	Waipa District	03	Waikato Region	2.727e+06	6.36472e+06	1	964800	6	985	25	2
2799400	21	599700	Parkside	6404	Timaru Ward	64	Timaru District	13	Canterbury Region	2.37069e+06	5.64358e+06	1	2799400	6	983	7	2
2799000	12	599700	Parkside	6404	Timaru Ward	64	Timaru District	13	Canterbury Region	2.37034e+06	5.64344e+06	1	2799000	6	998	4	2
1488600	111	548200	Hastings Central	3005	Hastings Ward	30	Hastings District	06	Hawke's Bay Region	2.8392e+06	6.16683e+06	1	1488600	9	1086	50	3
1488200	75	547700	St Leonards	3005	Hastings Ward	30	Hastings District	06	Hawke's Bay Region	2.83949e+06	6.16744e+06	1	1488200	6	976	26	2
1488000	144	547700	St Leonards	3005	Hastings Ward	30	Hastings District	06	Hawke's Bay Region	2.83935e+06	6.16743e+06	1	1488000	9	1082	65	3
1487800	24	547700	St Leonards	3005	Hastings Ward	30	Hastings District	06	Hawke's Bay Region	2.8392e+06	6.16743e+06	1	1487800	7	1006	8	2
964500	72	527502	Cambridge West	1702	Cambridge Ward	17	Waipa District	03	Waikato Region	2.72638e+06	6.36485e+06	1	964500	5	955	25	2
964600	117	527502	Cambridge West	1702	Cambridge Ward	17	Waipa District	03	Waikato Region	2.72661e+06	6.36481e+06	1	964600	5	955	41	2
964700	132	527502	Cambridge West	1702	Cambridge Ward	17	Waipa District	03	Waikato Region	2.72685e+06	6.36472e+06	1	964700	7	1013	46	2
1489000	3	548200	Hastings Central	3005	Hastings Ward	30	Hastings District	06	Hawke's Bay Region	2.83953e+06	6.1668e+06	1	1489000	8	1041	1	3
3061000	6	610230	Central Gore	7403	Gore Ward	74	Gore District	15	Southland Region	2.19632e+06	5.44877e+06	1	3061000	8	1071	3	3
3061100	3	610230	Central Gore	7403	Gore Ward	74	Gore District	15	Southland Region	2.1963e+06	5.44865e+06	1	3061100	8	1071	1	3
963200	201	527502	Cambridge West	1702	Cambridge Ward	17	Waipa District	03	Waikato Region	2.72632e+06	6.36593e+06	1	963200	3	928	66	1
963400	243	527502	Cambridge West	1702	Cambridge Ward	17	Waipa District	03	Waikato Region	2.7268e+06	6.36592e+06	1	963400	4	939	85	2
963300	237	527502	Cambridge West	1702	Cambridge Ward	17	Waipa District	03	Waikato Region	2.72656e+06	6.36592e+06	1	963300	4	952	83	2
1492200	12	548200	Hastings Central	3005	Hastings Ward	30	Hastings District	06	Hawke's Bay Region	2.83995e+06	6.16662e+06	1	1492200	9	1108	5	3
3064400	12	610230	Central Gore	7403	Gore Ward	74	Gore District	15	Southland Region	2.19642e+06	5.44828e+06	1	3064400	9	1080	5	3
444000	48	515700	Epsom North	704	Hobson Ward	7	Auckland City	02	Auckland Region	2.66793e+06	6.47948e+06	1	444000	4	935	17	2
1491000	6	548200	Hastings Central	3005	Hastings Ward	30	Hastings District	06	Hawke's Bay Region	2.83997e+06	6.16714e+06	1	1491000	8	1041	3	3
3063900	57	610210	North Gore	7403	Gore Ward	74	Gore District	15	Southland Region	2.19595e+06	5.44952e+06	1	3063900	4	944	20	2
2802900	156	599800	Timaru Gardens	6404	Timaru Ward	64	Timaru District	13	Canterbury Region	2.37068e+06	5.64247e+06	1	2802900	8	1039	70	3
2802000	60	599800	Timaru Gardens	6404	Timaru Ward	64	Timaru District	13	Canterbury Region	2.37017e+06	5.64258e+06	1	2802000	8	1046	27	3
2802800	75	599800	Timaru Gardens	6404	Timaru Ward	64	Timaru District	13	Canterbury Region	2.37046e+06	5.64255e+06	1	2802800	10	1172	34	3
2801900	183	599800	Timaru Gardens	6404	Timaru Ward	64	Timaru District	13	Canterbury Region	2.37003e+06	5.64252e+06	1	2801900	7	1009	64	2
1359900	147	543901	Makaraka	2806	Taruheru-Patutahi Ward	28	Gisborne District	05	Gisborne Region	2.94312e+06	6.27432e+06	1	1359900	2	915	49	1
968302	78	531003	Te Awamutu East	1704	Te Awamutu Ward	17	Waipa District	03	Waikato Region	2.71451e+06	6.35251e+06	1	968302	6	981	27	2
3064700	39	610250	South Gore	7403	Gore Ward	74	Gore District	15	Southland Region	2.19628e+06	5.44788e+06	1	3064700	8	1041	18	3
3064800	45	610250	South Gore	7403	Gore Ward	74	Gore District	15	Southland Region	2.19615e+06	5.44786e+06	1	3064800	7	1018	16	2
967201	102	527505	Leamington East	1702	Cambridge Ward	17	Waipa District	03	Waikato Region	2.72808e+06	6.36301e+06	1	967201	8	1067	46	3
442400	276	514302	Grafton East	704	Hobson Ward	7	Auckland City	02	Auckland Region	2.66806e+06	6.48093e+06	1	442400	10	1183	124	3
2803000	78	599800	Timaru Gardens	6404	Timaru Ward	64	Timaru District	13	Canterbury Region	2.37039e+06	5.64228e+06	1	2803000	8	1042	35	3
2803100	93	599800	Timaru Gardens	6404	Timaru Ward	64	Timaru District	13	Canterbury Region	2.37062e+06	5.64231e+06	1	2803100	5	970	33	2
2803200	90	599800	Timaru Gardens	6404	Timaru Ward	64	Timaru District	13	Canterbury Region	2.37095e+06	5.64238e+06	1	2803200	8	1042	40	3
2803300	3	599800	Timaru Gardens	6404	Timaru Ward	64	Timaru District	13	Canterbury Region	2.37127e+06	5.64228e+06	1	2803300	7	1012	1	2
50400	81	501200	Haruru Falls	102	Eastern Ward	1	Far North District	01	Northland Region	2.60688e+06	6.6571e+06	1	50400	7	1022	28	2
50803	63	501200	Haruru Falls	102	Eastern Ward	1	Far North District	01	Northland Region	2.60656e+06	6.65711e+06	1	50803	8	1036	28	3
50605	60	501633	Waihou Valley-Hupara	102	Eastern Ward	1	Far North District	01	Northland Region	2.60216e+06	6.65619e+06	1	50605	3	924	20	1
50806	3	501200	Haruru Falls	102	Eastern Ward	1	Far North District	01	Northland Region	2.60604e+06	6.65707e+06	1	50806	8	1036	1	3
441501	84	514301	Grafton West	704	Hobson Ward	7	Auckland City	02	Auckland Region	2.66748e+06	6.48065e+06	1	441501	8	1066	38	3
2801000	84	599700	Parkside	6404	Timaru Ward	64	Timaru District	13	Canterbury Region	2.37102e+06	5.64328e+06	1	2801000	10	1149	38	3
2801100	27	599700	Parkside	6404	Timaru Ward	64	Timaru District	13	Canterbury Region	2.37116e+06	5.64323e+06	1	2801100	10	1149	12	3
440900	363	514301	Grafton West	704	Hobson Ward	7	Auckland City	02	Auckland Region	2.66784e+06	6.48115e+06	1	440900	10	1183	163	3
1489900	6	548200	Hastings Central	3005	Hastings Ward	30	Hastings District	06	Hawke's Bay Region	2.8396e+06	6.16652e+06	1	1489900	8	1052	3	3
3062700	27	610210	North Gore	7403	Gore Ward	74	Gore District	15	Southland Region	2.19625e+06	5.44902e+06	1	3062700	9	1105	12	3
1490400	198	548200	Hastings Central	3005	Hastings Ward	30	Hastings District	06	Hawke's Bay Region	2.83977e+06	6.1673e+06	1	1490400	10	1145	89	3
965501	186	527505	Leamington East	1702	Cambridge Ward	17	Waipa District	03	Waikato Region	2.72845e+06	6.36424e+06	1	965501	2	916	61	1
965000	30	527503	Cambridge Central	1702	Cambridge Ward	17	Waipa District	03	Waikato Region	2.72709e+06	6.36453e+06	1	965000	5	969	10	2
965800	51	527504	Leamington West	1702	Cambridge Ward	17	Waipa District	03	Waikato Region	2.72801e+06	6.36395e+06	1	965800	4	942	18	2
965100	15	527503	Cambridge Central	1702	Cambridge Ward	17	Waipa District	03	Waikato Region	2.72741e+06	6.36447e+06	1	965100	5	969	5	2
965200	27	527503	Cambridge Central	1702	Cambridge Ward	17	Waipa District	03	Waikato Region	2.72758e+06	6.36451e+06	1	965200	5	969	9	2
965400	159	527503	Cambridge Central	1702	Cambridge Ward	17	Waipa District	03	Waikato Region	2.72781e+06	6.36437e+06	1	965400	5	969	56	2
2800800	129	599700	Parkside	6404	Timaru Ward	64	Timaru District	13	Canterbury Region	2.37039e+06	5.64305e+06	1	2800800	9	1111	58	3
2800700	30	599700	Parkside	6404	Timaru Ward	64	Timaru District	13	Canterbury Region	2.37026e+06	5.64299e+06	1	2800700	8	1039	14	3
2801300	87	599700	Parkside	6404	Timaru Ward	64	Timaru District	13	Canterbury Region	2.37085e+06	5.643e+06	1	2801300	10	1192	39	3
2801200	153	599700	Parkside	6404	Timaru Ward	64	Timaru District	13	Canterbury Region	2.37062e+06	5.64303e+06	1	2801200	8	1063	69	3
1489700	114	548200	Hastings Central	3005	Hastings Ward	30	Hastings District	06	Hawke's Bay Region	2.83936e+06	6.16628e+06	1	1489700	8	1052	51	3
1489400	42	548200	Hastings Central	3005	Hastings Ward	30	Hastings District	06	Hawke's Bay Region	2.83943e+06	6.16672e+06	1	1489400	9	1131	19	3
1490300	126	548200	Hastings Central	3005	Hastings Ward	30	Hastings District	06	Hawke's Bay Region	2.83966e+06	6.16722e+06	1	1490300	7	1019	44	2
966000	219	527504	Leamington West	1702	Cambridge Ward	17	Waipa District	03	Waikato Region	2.72766e+06	6.36377e+06	1	966000	5	954	77	2
965502	207	527505	Leamington East	1702	Cambridge Ward	17	Waipa District	03	Waikato Region	2.7282e+06	6.36393e+06	1	965502	2	912	68	1
965300	6	527503	Cambridge Central	1702	Cambridge Ward	17	Waipa District	03	Waikato Region	2.72763e+06	6.36424e+06	1	965300	5	969	2	2
442100	3	514302	Grafton East	704	Hobson Ward	7	Auckland City	02	Auckland Region	2.66805e+06	6.48022e+06	1	442100	7	1004	1	2
441900	18	514301	Grafton West	704	Hobson Ward	7	Auckland City	02	Auckland Region	2.66755e+06	6.48023e+06	1	441900	7	1004	6	2
441000	3	514301	Grafton West	704	Hobson Ward	7	Auckland City	02	Auckland Region	2.66796e+06	6.48091e+06	1	441000	10	1183	1	3
47702	6	501620	Pokere-Waihaha	102	Eastern Ward	1	Far North District	01	Northland Region	2.60989e+06	6.64876e+06	1	47702	7	999	2	2
441100	351	514301	Grafton West	704	Hobson Ward	7	Auckland City	02	Auckland Region	2.66784e+06	6.48124e+06	1	441100	10	1159	158	3
441505	162	514301	Grafton West	704	Hobson Ward	7	Auckland City	02	Auckland Region	2.66744e+06	6.48051e+06	1	441505	8	1039	73	3
441600	3	514301	Grafton West	704	Hobson Ward	7	Auckland City	02	Auckland Region	2.66768e+06	6.48042e+06	1	441600	7	1004	1	2
441200	126	514301	Grafton West	704	Hobson Ward	7	Auckland City	02	Auckland Region	2.66782e+06	6.4808e+06	1	441200	6	999	44	2
441503	162	514301	Grafton West	704	Hobson Ward	7	Auckland City	02	Auckland Region	2.66759e+06	6.48055e+06	1	441503	6	979	57	2
1490900	33	548200	Hastings Central	3005	Hastings Ward	30	Hastings District	06	Hawke's Bay Region	2.83981e+06	6.16701e+06	1	1490900	8	1041	15	3
1489801	42	548200	Hastings Central	3005	Hastings Ward	30	Hastings District	06	Hawke's Bay Region	2.83942e+06	6.16654e+06	1	1489801	8	1052	19	3
3062900	15	610210	North Gore	7403	Gore Ward	74	Gore District	15	Southland Region	2.1964e+06	5.44921e+06	1	3062900	9	1105	7	3
3062500	48	610210	North Gore	7403	Gore Ward	74	Gore District	15	Southland Region	2.19618e+06	5.44932e+06	1	3062500	7	1014	17	2
3062600	51	610210	North Gore	7403	Gore Ward	74	Gore District	15	Southland Region	2.19627e+06	5.44913e+06	1	3062600	7	1014	18	2
441506	210	514301	Grafton West	704	Hobson Ward	7	Auckland City	02	Auckland Region	2.66758e+06	6.48046e+06	1	441506	7	1010	74	2
441400	9	514301	Grafton West	704	Hobson Ward	7	Auckland City	02	Auckland Region	2.66752e+06	6.48073e+06	1	441400	6	999	3	2
1490700	18	548200	Hastings Central	3005	Hastings Ward	30	Hastings District	06	Hawke's Bay Region	2.83961e+06	6.16686e+06	1	1490700	8	1041	8	3
3062200	87	610210	North Gore	7403	Gore Ward	74	Gore District	15	Southland Region	2.19594e+06	5.44897e+06	1	3062200	8	1051	39	3
1490500	135	548200	Hastings Central	3005	Hastings Ward	30	Hastings District	06	Hawke's Bay Region	2.83989e+06	6.16741e+06	1	1490500	5	968	47	2
2800300	9	599700	Parkside	6404	Timaru Ward	64	Timaru District	13	Canterbury Region	2.3702e+06	5.64326e+06	1	2800300	6	976	3	2
2800400	66	599700	Parkside	6404	Timaru Ward	64	Timaru District	13	Canterbury Region	2.37038e+06	5.64323e+06	1	2800400	8	1039	30	3
2800900	75	599700	Parkside	6404	Timaru Ward	64	Timaru District	13	Canterbury Region	2.37085e+06	5.64328e+06	1	2800900	6	983	26	2
2801400	93	599700	Parkside	6404	Timaru Ward	64	Timaru District	13	Canterbury Region	2.37103e+06	5.64306e+06	1	2801400	7	1007	33	2
441502	138	514301	Grafton West	704	Hobson Ward	7	Auckland City	02	Auckland Region	2.66746e+06	6.48057e+06	1	441502	8	1066	62	3
441700	3	514302	Grafton East	704	Hobson Ward	7	Auckland City	02	Auckland Region	2.66776e+06	6.48043e+06	1	441700	7	1004	1	2
1359600	63	543901	Makaraka	2806	Taruheru-Patutahi Ward	28	Gisborne District	05	Gisborne Region	2.94397e+06	6.27274e+06	1	1359600	3	932	21	1
1359700	162	543901	Makaraka	2806	Taruheru-Patutahi Ward	28	Gisborne District	05	Gisborne Region	2.94338e+06	6.27312e+06	1	1359700	2	917	53	1
1489802	21	548200	Hastings Central	3005	Hastings Ward	30	Hastings District	06	Hawke's Bay Region	2.83949e+06	6.16642e+06	1	1489802	8	1052	9	3
1494400	3	548200	Hastings Central	3005	Hastings Ward	30	Hastings District	06	Hawke's Bay Region	2.84023e+06	6.16665e+06	1	1494400	8	1046	1	3
444800	216	515700	Epsom North	704	Hobson Ward	7	Auckland City	02	Auckland Region	2.66812e+06	6.47861e+06	1	444800	3	935	71	1
969400	69	531002	Te Awamutu Central	1704	Te Awamutu Ward	17	Waipa District	03	Waikato Region	2.71328e+06	6.35269e+06	1	969400	6	998	24	2
970000	153	531002	Te Awamutu Central	1704	Te Awamutu Ward	17	Waipa District	03	Waikato Region	2.71389e+06	6.35265e+06	1	970000	7	1014	54	2
1493800	18	548200	Hastings Central	3005	Hastings Ward	30	Hastings District	06	Hawke's Bay Region	2.84007e+06	6.16608e+06	1	1493800	9	1108	8	3
1494000	93	548200	Hastings Central	3005	Hastings Ward	30	Hastings District	06	Hawke's Bay Region	2.84018e+06	6.16612e+06	1	1494000	10	1356	42	3
1494300	78	548200	Hastings Central	3005	Hastings Ward	30	Hastings District	06	Hawke's Bay Region	2.8406e+06	6.16707e+06	1	1494300	9	1108	35	3
2803500	114	599800	Timaru Gardens	6404	Timaru Ward	64	Timaru District	13	Canterbury Region	2.37058e+06	5.64217e+06	1	2803500	7	1012	40	2
2803600	132	599800	Timaru Gardens	6404	Timaru Ward	64	Timaru District	13	Canterbury Region	2.37096e+06	5.64225e+06	1	2803600	8	1059	59	3
2803700	81	599900	Redruth	6404	Timaru Ward	64	Timaru District	13	Canterbury Region	2.37034e+06	5.64192e+06	1	2803700	8	1059	36	3
51402	27	501100	Paihia	102	Eastern Ward	1	Far North District	01	Northland Region	2.61085e+06	6.655e+06	1	51402	2	912	9	1
51406	171	501100	Paihia	102	Eastern Ward	1	Far North District	01	Northland Region	2.61054e+06	6.65486e+06	1	51406	5	958	60	2
51408	93	501100	Paihia	102	Eastern Ward	1	Far North District	01	Northland Region	2.6106e+06	6.65454e+06	1	51408	6	980	33	2
969600	129	531002	Te Awamutu Central	1704	Te Awamutu Ward	17	Waipa District	03	Waikato Region	2.71345e+06	6.35246e+06	1	969600	6	984	45	2
51409	78	501100	Paihia	102	Eastern Ward	1	Far North District	01	Northland Region	2.61049e+06	6.65432e+06	1	51409	6	980	27	2
443600	207	515700	Epsom North	704	Hobson Ward	7	Auckland City	02	Auckland Region	2.66819e+06	6.47967e+06	1	443600	2	916	68	1
967801	114	527505	Leamington East	1702	Cambridge Ward	17	Waipa District	03	Waikato Region	2.72752e+06	6.36232e+06	1	967801	7	1022	40	2
967602	294	527504	Leamington West	1702	Cambridge Ward	17	Waipa District	03	Waikato Region	2.72737e+06	6.3624e+06	1	967602	5	965	103	2
443700	132	515700	Epsom North	704	Hobson Ward	7	Auckland City	02	Auckland Region	2.66837e+06	6.47935e+06	1	443700	3	919	44	1
1360200	252	543902	Matokitoki	2806	Taruheru-Patutahi Ward	28	Gisborne District	05	Gisborne Region	2.94423e+06	6.2753e+06	1	1360200	2	915	83	1
442800	183	514302	Grafton East	704	Hobson Ward	7	Auckland City	02	Auckland Region	2.66789e+06	6.48071e+06	1	442800	7	1005	64	2
1492000	3	548200	Hastings Central	3005	Hastings Ward	30	Hastings District	06	Hawke's Bay Region	2.83978e+06	6.16647e+06	1	1492000	9	1108	1	3
1492600	18	548200	Hastings Central	3005	Hastings Ward	30	Hastings District	06	Hawke's Bay Region	2.83986e+06	6.16636e+06	1	1492600	9	1108	8	3
3064300	3	610230	Central Gore	7403	Gore Ward	74	Gore District	15	Southland Region	2.19649e+06	5.44847e+06	1	3064300	9	1080	1	3
443800	24	515700	Epsom North	704	Hobson Ward	7	Auckland City	02	Auckland Region	2.66818e+06	6.47949e+06	1	443800	4	935	8	2
2802300	6	599800	Timaru Gardens	6404	Timaru Ward	64	Timaru District	13	Canterbury Region	2.37113e+06	5.64292e+06	1	2802300	8	1054	3	3
2801800	120	599800	Timaru Gardens	6404	Timaru Ward	64	Timaru District	13	Canterbury Region	2.37037e+06	5.64282e+06	1	2801800	9	1128	54	3
2802600	66	599800	Timaru Gardens	6404	Timaru Ward	64	Timaru District	13	Canterbury Region	2.37042e+06	5.64268e+06	1	2802600	7	1019	23	2
443000	96	514302	Grafton East	704	Hobson Ward	7	Auckland City	02	Auckland Region	2.66805e+06	6.48066e+06	1	443000	7	1010	34	2
442600	183	514302	Grafton East	704	Hobson Ward	7	Auckland City	02	Auckland Region	2.66798e+06	6.48068e+06	1	442600	7	1004	64	2
1492400	9	548200	Hastings Central	3005	Hastings Ward	30	Hastings District	06	Hawke's Bay Region	2.83965e+06	6.16624e+06	1	1492400	9	1108	4	3
3064500	69	610250	South Gore	7403	Gore Ward	74	Gore District	15	Southland Region	2.19649e+06	5.448e+06	1	3064500	9	1080	31	3
3064600	60	610250	South Gore	7403	Gore Ward	74	Gore District	15	Southland Region	2.19638e+06	5.44792e+06	1	3064600	8	1041	27	3
967000	306	527505	Leamington East	1702	Cambridge Ward	17	Waipa District	03	Waikato Region	2.72788e+06	6.3631e+06	1	967000	6	976	107	2
966900	210	527504	Leamington West	1702	Cambridge Ward	17	Waipa District	03	Waikato Region	2.72764e+06	6.36313e+06	1	966900	8	1062	94	3
967300	39	527504	Leamington West	1702	Cambridge Ward	17	Waipa District	03	Waikato Region	2.7276e+06	6.36345e+06	1	967300	8	1067	18	3
442900	108	514302	Grafton East	704	Hobson Ward	7	Auckland City	02	Auckland Region	2.66799e+06	6.48065e+06	1	442900	8	1069	49	3
443500	171	515700	Epsom North	704	Hobson Ward	7	Auckland City	02	Auckland Region	2.66861e+06	6.47917e+06	1	443500	8	1042	77	3
1492100	18	548200	Hastings Central	3005	Hastings Ward	30	Hastings District	06	Hawke's Bay Region	2.83988e+06	6.16653e+06	1	1492100	9	1108	8	3
967700	240	527505	Leamington East	1702	Cambridge Ward	17	Waipa District	03	Waikato Region	2.72771e+06	6.36265e+06	1	967700	8	1039	108	3
967601	213	527504	Leamington West	1702	Cambridge Ward	17	Waipa District	03	Waikato Region	2.72749e+06	6.36276e+06	1	967601	5	963	75	2
967402	237	527504	Leamington West	1702	Cambridge Ward	17	Waipa District	03	Waikato Region	2.72728e+06	6.36284e+06	1	967402	8	1035	107	3
442500	63	514302	Grafton East	704	Hobson Ward	7	Auckland City	02	Auckland Region	2.66792e+06	6.4805e+06	1	442500	7	1010	22	2
1491400	21	548200	Hastings Central	3005	Hastings Ward	30	Hastings District	06	Hawke's Bay Region	2.8399e+06	6.1669e+06	1	1491400	6	986	7	2
443900	3	515700	Epsom North	704	Hobson Ward	7	Auckland City	02	Auckland Region	2.6682e+06	6.47934e+06	1	443900	4	935	1	2
967802	81	527505	Leamington East	1702	Cambridge Ward	17	Waipa District	03	Waikato Region	2.72762e+06	6.36229e+06	1	967802	7	1022	28	2
443200	144	515700	Epsom North	704	Hobson Ward	7	Auckland City	02	Auckland Region	2.66842e+06	6.47988e+06	1	443200	5	963	50	2
50503	6	501615	Waitangi	102	Eastern Ward	1	Far North District	01	Northland Region	2.60835e+06	6.66041e+06	1	50503	5	959	2	2
443400	150	515700	Epsom North	704	Hobson Ward	7	Auckland City	02	Auckland Region	2.66865e+06	6.4793e+06	1	443400	6	981	52	2
442700	9	514302	Grafton East	704	Hobson Ward	7	Auckland City	02	Auckland Region	2.6679e+06	6.48059e+06	1	442700	7	1010	3	2
50301	270	501200	Haruru Falls	102	Eastern Ward	1	Far North District	01	Northland Region	2.6073e+06	6.65733e+06	1	50301	7	1022	94	2
50701	21	501200	Haruru Falls	102	Eastern Ward	1	Far North District	01	Northland Region	2.60632e+06	6.65734e+06	1	50701	6	984	7	2
50306	60	501200	Haruru Falls	102	Eastern Ward	1	Far North District	01	Northland Region	2.60705e+06	6.65738e+06	1	50306	7	1016	21	2
50305	60	501200	Haruru Falls	102	Eastern Ward	1	Far North District	01	Northland Region	2.60693e+06	6.6573e+06	1	50305	5	958	21	2
2802400	93	599800	Timaru Gardens	6404	Timaru Ward	64	Timaru District	13	Canterbury Region	2.37135e+06	5.64273e+06	1	2802400	8	1054	42	3
447400	102	515801	Epsom Central	704	Hobson Ward	7	Auckland City	02	Auckland Region	2.66833e+06	6.47716e+06	1	447400	6	993	36	2
971500	156	531002	Te Awamutu Central	1704	Te Awamutu Ward	17	Waipa District	03	Waikato Region	2.71355e+06	6.35222e+06	1	971500	6	988	55	2
1495100	66	548200	Hastings Central	3005	Hastings Ward	30	Hastings District	06	Hawke's Bay Region	2.84073e+06	6.16659e+06	1	1495100	9	1080	30	3
1496200	114	548000	Mayfair	3005	Hastings Ward	30	Hastings District	06	Hawke's Bay Region	2.84118e+06	6.16792e+06	1	1496200	3	919	38	1
1495000	81	548200	Hastings Central	3005	Hastings Ward	30	Hastings District	06	Hawke's Bay Region	2.84062e+06	6.16652e+06	1	1495000	9	1080	36	3
446000	90	515801	Epsom Central	704	Hobson Ward	7	Auckland City	02	Auckland Region	2.66848e+06	6.47829e+06	1	446000	3	932	30	1
446300	258	515801	Epsom Central	704	Hobson Ward	7	Auckland City	02	Auckland Region	2.66842e+06	6.47793e+06	1	446300	3	918	85	1
54100	24	501100	Paihia	102	Eastern Ward	1	Far North District	01	Northland Region	2.60922e+06	6.65729e+06	1	54100	4	946	8	2
54200	195	501100	Paihia	102	Eastern Ward	1	Far North District	01	Northland Region	2.60982e+06	6.657e+06	1	54200	6	985	68	2
54300	27	501100	Paihia	102	Eastern Ward	1	Far North District	01	Northland Region	2.61003e+06	6.65703e+06	1	54300	10	1335	12	3
54502	51	501100	Paihia	102	Eastern Ward	1	Far North District	01	Northland Region	2.61028e+06	6.65657e+06	1	54502	6	975	18	2
970300	75	531002	Te Awamutu Central	1704	Te Awamutu Ward	17	Waipa District	03	Waikato Region	2.71425e+06	6.35249e+06	1	970300	9	1089	34	3
1493600	156	548200	Hastings Central	3005	Hastings Ward	30	Hastings District	06	Hawke's Bay Region	2.83985e+06	6.16596e+06	1	1493600	10	1141	70	3
444400	126	515700	Epsom North	704	Hobson Ward	7	Auckland City	02	Auckland Region	2.66814e+06	6.47896e+06	1	444400	1	857	42	1
444600	135	515700	Epsom North	704	Hobson Ward	7	Auckland City	02	Auckland Region	2.66832e+06	6.47878e+06	1	444600	7	1019	47	2
620400	132	519500	Penrose	706	Tamaki-Maungakiekie Ward	7	Auckland City	02	Auckland Region	2.6712e+06	6.47623e+06	1	620400	6	991	46	2
1492800	3	548200	Hastings Central	3005	Hastings Ward	30	Hastings District	06	Hawke's Bay Region	2.84003e+06	6.16652e+06	1	1492800	9	1108	1	3
969300	78	531002	Te Awamutu Central	1704	Te Awamutu Ward	17	Waipa District	03	Waikato Region	2.71335e+06	6.35284e+06	1	969300	6	998	27	2
969201	39	531001	Te Awamutu West	1704	Te Awamutu Ward	17	Waipa District	03	Waikato Region	2.71278e+06	6.35295e+06	1	969201	7	1028	14	2
444700	225	515700	Epsom North	704	Hobson Ward	7	Auckland City	02	Auckland Region	2.66825e+06	6.47851e+06	1	444700	5	958	79	2
444200	72	515700	Epsom North	704	Hobson Ward	7	Auckland City	02	Auckland Region	2.66834e+06	6.47912e+06	1	444200	4	935	25	2
969202	45	531001	Te Awamutu West	1704	Te Awamutu Ward	17	Waipa District	03	Waikato Region	2.71275e+06	6.35275e+06	1	969202	7	1028	16	2
969900	90	531002	Te Awamutu Central	1704	Te Awamutu Ward	17	Waipa District	03	Waikato Region	2.71397e+06	6.35281e+06	1	969900	5	965	31	2
970100	69	531002	Te Awamutu Central	1704	Te Awamutu Ward	17	Waipa District	03	Waikato Region	2.71421e+06	6.3527e+06	1	970100	9	1089	31	3
1493900	3	548200	Hastings Central	3005	Hastings Ward	30	Hastings District	06	Hawke's Bay Region	2.84012e+06	6.1662e+06	1	1493900	7	1002	1	2
969800	243	531003	Te Awamutu East	1704	Te Awamutu Ward	17	Waipa District	03	Waikato Region	2.71416e+06	6.35308e+06	1	969800	3	925	80	1
444100	126	515700	Epsom North	704	Hobson Ward	7	Auckland City	02	Auckland Region	2.66803e+06	6.47934e+06	1	444100	2	906	42	1
1493700	120	548200	Hastings Central	3005	Hastings Ward	30	Hastings District	06	Hawke's Bay Region	2.83992e+06	6.16605e+06	1	1493700	9	1116	54	3
1494100	15	548200	Hastings Central	3005	Hastings Ward	30	Hastings District	06	Hawke's Bay Region	2.84033e+06	6.16686e+06	1	1494100	9	1108	7	3
969500	45	531002	Te Awamutu Central	1704	Te Awamutu Ward	17	Waipa District	03	Waikato Region	2.7136e+06	6.35277e+06	1	969500	6	984	16	2
969100	57	531001	Te Awamutu West	1704	Te Awamutu Ward	17	Waipa District	03	Waikato Region	2.71259e+06	6.35304e+06	1	969100	7	1028	20	2
51102	12	501615	Waitangi	102	Eastern Ward	1	Far North District	01	Northland Region	2.60642e+06	6.65779e+06	1	51102	6	984	4	2
1493400	93	548200	Hastings Central	3005	Hastings Ward	30	Hastings District	06	Hawke's Bay Region	2.84021e+06	6.16628e+06	1	1493400	9	1075	42	3
1493502	57	548200	Hastings Central	3005	Hastings Ward	30	Hastings District	06	Hawke's Bay Region	2.84033e+06	6.16632e+06	1	1493502	7	1002	20	2
444300	75	515700	Epsom North	704	Hobson Ward	7	Auckland City	02	Auckland Region	2.66811e+06	6.4791e+06	1	444300	2	906	25	1
1366200	141	544300	Te Hapara	2807	Gisborne Ward	28	Gisborne District	05	Gisborne Region	2.94539e+06	6.27179e+06	1	1366200	6	998	49	2
2545300	93	589500	Deans Bush	6004	Riccarton-Wigram Ward	60	Christchurch City	13	Canterbury Region	2.47749e+06	5.74236e+06	1	2545300	3	921	31	1
1497100	240	548000	Mayfair	3005	Hastings Ward	30	Hastings District	06	Hawke's Bay Region	2.84123e+06	6.1671e+06	1	1497100	6	997	84	2
449000	186	515802	Epsom South	704	Hobson Ward	7	Auckland City	02	Auckland Region	2.66839e+06	6.47693e+06	1	449000	5	956	65	2
448800	228	515802	Epsom South	704	Hobson Ward	7	Auckland City	02	Auckland Region	2.66832e+06	6.47709e+06	1	448800	5	969	80	2
1472804	216	548100	Parkvale	3005	Hastings Ward	30	Hastings District	06	Hawke's Bay Region	2.84133e+06	6.16542e+06	1	1472804	4	940	76	2
1497500	96	548000	Mayfair	3005	Hastings Ward	30	Hastings District	06	Hawke's Bay Region	2.84102e+06	6.1671e+06	1	1497500	6	996	34	2
1496600	60	548000	Mayfair	3005	Hastings Ward	30	Hastings District	06	Hawke's Bay Region	2.84126e+06	6.16776e+06	1	1496600	5	964	21	2
449100	300	515802	Epsom South	704	Hobson Ward	7	Auckland City	02	Auckland Region	2.66826e+06	6.47681e+06	1	449100	2	917	99	1
54600	57	501100	Paihia	102	Eastern Ward	1	Far North District	01	Northland Region	2.61046e+06	6.65658e+06	1	54600	4	942	20	2
54801	84	501100	Paihia	102	Eastern Ward	1	Far North District	01	Northland Region	2.61065e+06	6.65617e+06	1	54801	6	979	29	2
54700	87	501100	Paihia	102	Eastern Ward	1	Far North District	01	Northland Region	2.61037e+06	6.6564e+06	1	54700	4	942	30	2
54802	123	501100	Paihia	102	Eastern Ward	1	Far North District	01	Northland Region	2.61063e+06	6.65588e+06	1	54802	7	1002	43	2
1495600	198	548000	Mayfair	3005	Hastings Ward	30	Hastings District	06	Hawke's Bay Region	2.84103e+06	6.16748e+06	1	1495600	4	953	69	2
1496000	66	548000	Mayfair	3005	Hastings Ward	30	Hastings District	06	Hawke's Bay Region	2.84114e+06	6.16753e+06	1	1496000	4	951	23	2
446100	213	515801	Epsom Central	704	Hobson Ward	7	Auckland City	02	Auckland Region	2.66846e+06	6.47819e+06	1	446100	7	1004	75	2
971400	69	531002	Te Awamutu Central	1704	Te Awamutu Ward	17	Waipa District	03	Waikato Region	2.71371e+06	6.35234e+06	1	971400	7	1010	24	2
1494900	54	548200	Hastings Central	3005	Hastings Ward	30	Hastings District	06	Hawke's Bay Region	2.84053e+06	6.16644e+06	1	1494900	4	943	19	2
1494600	27	548200	Hastings Central	3005	Hastings Ward	30	Hastings District	06	Hawke's Bay Region	2.84056e+06	6.16682e+06	1	1494600	8	1046	12	3
1495700	117	548000	Mayfair	3005	Hastings Ward	30	Hastings District	06	Hawke's Bay Region	2.841e+06	6.16733e+06	1	1495700	8	1039	53	3
1495900	117	548000	Mayfair	3005	Hastings Ward	30	Hastings District	06	Hawke's Bay Region	2.84083e+06	6.16728e+06	1	1495900	3	932	39	1
446400	81	515801	Epsom Central	704	Hobson Ward	7	Auckland City	02	Auckland Region	2.66847e+06	6.47782e+06	1	446400	3	932	27	1
447300	231	515801	Epsom Central	704	Hobson Ward	7	Auckland City	02	Auckland Region	2.66836e+06	6.47728e+06	1	447300	5	954	81	2
970200	132	531002	Te Awamutu Central	1704	Te Awamutu Ward	17	Waipa District	03	Waikato Region	2.71411e+06	6.35257e+06	1	970200	9	1126	59	3
1496100	135	548000	Mayfair	3005	Hastings Ward	30	Hastings District	06	Hawke's Bay Region	2.84123e+06	6.16756e+06	1	1496100	6	995	47	2
446600	207	515801	Epsom Central	704	Hobson Ward	7	Auckland City	02	Auckland Region	2.66843e+06	6.47765e+06	1	446600	2	913	68	1
971300	108	531002	Te Awamutu Central	1704	Te Awamutu Ward	17	Waipa District	03	Waikato Region	2.71385e+06	6.35247e+06	1	971300	7	1010	38	2
1494700	33	548200	Hastings Central	3005	Hastings Ward	30	Hastings District	06	Hawke's Bay Region	2.84067e+06	6.16689e+06	1	1494700	8	1046	15	3
53303	75	500900	Kerikeri	102	Eastern Ward	1	Far North District	01	Northland Region	2.59712e+06	6.66338e+06	1	53303	8	1033	34	3
53405	45	500900	Kerikeri	102	Eastern Ward	1	Far North District	01	Northland Region	2.59739e+06	6.66332e+06	1	53405	8	1049	20	3
53407	138	500900	Kerikeri	102	Eastern Ward	1	Far North District	01	Northland Region	2.5976e+06	6.66303e+06	1	53407	8	1037	62	3
53305	120	500900	Kerikeri	102	Eastern Ward	1	Far North District	01	Northland Region	2.59692e+06	6.66315e+06	1	53305	9	1129	54	3
53600	3	500900	Kerikeri	102	Eastern Ward	1	Far North District	01	Northland Region	2.59718e+06	6.66311e+06	1	53600	9	1091	1	3
447100	213	515801	Epsom Central	704	Hobson Ward	7	Auckland City	02	Auckland Region	2.6684e+06	6.47753e+06	1	447100	5	967	75	2
53501	225	500900	Kerikeri	102	Eastern Ward	1	Far North District	01	Northland Region	2.5972e+06	6.66286e+06	1	53501	9	1091	101	3
447200	318	515801	Epsom Central	704	Hobson Ward	7	Auckland City	02	Auckland Region	2.66839e+06	6.4774e+06	1	447200	6	999	111	2
446200	294	515801	Epsom Central	704	Hobson Ward	7	Auckland City	02	Auckland Region	2.66844e+06	6.47808e+06	1	446200	5	955	103	2
1494800	42	548200	Hastings Central	3005	Hastings Ward	30	Hastings District	06	Hawke's Bay Region	2.84044e+06	6.16637e+06	1	1494800	4	943	15	2
53800	123	501100	Paihia	102	Eastern Ward	1	Far North District	01	Northland Region	2.6089e+06	6.65767e+06	1	53800	10	1335	55	3
53700	42	501100	Paihia	102	Eastern Ward	1	Far North District	01	Northland Region	2.6087e+06	6.65751e+06	1	53700	10	1335	19	3
53900	135	501100	Paihia	102	Eastern Ward	1	Far North District	01	Northland Region	2.60914e+06	6.65758e+06	1	53900	10	1154	61	3
54000	87	501100	Paihia	102	Eastern Ward	1	Far North District	01	Northland Region	2.60953e+06	6.65736e+06	1	54000	4	946	30	2
1494500	12	548200	Hastings Central	3005	Hastings Ward	30	Hastings District	06	Hawke's Bay Region	2.84042e+06	6.1667e+06	1	1494500	8	1046	5	3
1490200	75	548200	Hastings Central	3005	Hastings Ward	30	Hastings District	06	Hawke's Bay Region	2.83956e+06	6.16715e+06	1	1490200	8	1051	34	3
1499400	129	548100	Parkvale	3005	Hastings Ward	30	Hastings District	06	Hawke's Bay Region	2.84086e+06	6.16611e+06	1	1499400	6	996	45	2
449700	114	517400	Newmarket	704	Hobson Ward	7	Auckland City	02	Auckland Region	2.66822e+06	6.48051e+06	1	449700	7	1003	40	2
1761401	57	560422	Tokorangi-Hiwinui	3901	Kiwitea-Pohangina Ward	39	Manawatu District	08	Manawatu-Wanganui Region	2.73414e+06	6.11086e+06	1	1761401	3	923	19	1
1499300	63	548100	Parkvale	3005	Hastings Ward	30	Hastings District	06	Hawke's Bay Region	2.84092e+06	6.16593e+06	1	1499300	4	946	22	2
450700	147	517400	Newmarket	704	Hobson Ward	7	Auckland City	02	Auckland Region	2.66911e+06	6.48034e+06	1	450700	8	1044	66	3
449900	114	517400	Newmarket	704	Hobson Ward	7	Auckland City	02	Auckland Region	2.6681e+06	6.48037e+06	1	449900	7	1003	40	2
2545100	150	589500	Deans Bush	6002	Fendalton-Waimairi Ward	60	Christchurch City	13	Canterbury Region	2.47772e+06	5.74245e+06	1	2545100	3	923	50	1
1497200	135	548000	Mayfair	3005	Hastings Ward	30	Hastings District	06	Hawke's Bay Region	2.84137e+06	6.16731e+06	1	1497200	7	1002	47	2
1496400	108	548000	Mayfair	3005	Hastings Ward	30	Hastings District	06	Hawke's Bay Region	2.84129e+06	6.16801e+06	1	1496400	5	964	38	2
2545400	210	589500	Deans Bush	6004	Riccarton-Wigram Ward	60	Christchurch City	13	Canterbury Region	2.47733e+06	5.74219e+06	1	2545400	1	878	69	1
1496500	141	548000	Mayfair	3005	Hastings Ward	30	Hastings District	06	Hawke's Bay Region	2.84139e+06	6.16777e+06	1	1496500	8	1054	63	3
1366300	231	544300	Te Hapara	2807	Gisborne Ward	28	Gisborne District	05	Gisborne Region	2.94566e+06	6.27163e+06	1	1366300	3	930	76	1
1366400	129	544300	Te Hapara	2807	Gisborne Ward	28	Gisborne District	05	Gisborne Region	2.9459e+06	6.27149e+06	1	1366400	8	1049	58	3
1497400	39	548000	Mayfair	3005	Hastings Ward	30	Hastings District	06	Hawke's Bay Region	2.84086e+06	6.16702e+06	1	1497400	8	1046	18	3
1496700	147	548000	Mayfair	3005	Hastings Ward	30	Hastings District	06	Hawke's Bay Region	2.84148e+06	6.16759e+06	1	1496700	6	983	51	2
973400	6	531004	Te Awamutu South	1704	Te Awamutu Ward	17	Waipa District	03	Waikato Region	2.71463e+06	6.35222e+06	1	973400	9	1123	3	3
973000	3	531002	Te Awamutu Central	1704	Te Awamutu Ward	17	Waipa District	03	Waikato Region	2.71409e+06	6.35234e+06	1	973000	9	1123	1	3
1429800	3	546901	Nelson Park	3199	Area Outside Ward	31	Napier City	06	Hawke's Bay Region	2.8467e+06	6.18278e+06	1	1429800	5	961	1	2
1368900	123	544600	Gisborne Central	2807	Gisborne Ward	28	Gisborne District	05	Gisborne Region	2.94617e+06	6.2711e+06	1	1368900	8	1058	55	3
452300	21	515902	Parnell West	704	Hobson Ward	7	Auckland City	02	Auckland Region	2.6687e+06	6.48181e+06	1	452300	4	945	7	2
1499500	69	548100	Parkvale	3005	Hastings Ward	30	Hastings District	06	Hawke's Bay Region	2.84068e+06	6.16624e+06	1	1499500	7	1020	24	2
452400	69	515902	Parnell West	704	Hobson Ward	7	Auckland City	02	Auckland Region	2.66895e+06	6.48168e+06	1	452400	3	930	23	1
452000	258	515902	Parnell West	704	Hobson Ward	7	Auckland City	02	Auckland Region	2.66922e+06	6.48102e+06	1	452000	4	951	90	2
451800	174	515901	Parnell East	704	Hobson Ward	7	Auckland City	02	Auckland Region	2.66932e+06	6.48051e+06	1	451800	6	978	61	2
1761803	102	560412	Maewa	3903	Feilding Ward	39	Manawatu District	08	Manawatu-Wanganui Region	2.73035e+06	6.10754e+06	1	1761803	6	987	36	2
1369000	144	544600	Gisborne Central	2807	Gisborne Ward	28	Gisborne District	05	Gisborne Region	2.94646e+06	6.27093e+06	1	1369000	8	1066	65	3
451000	123	517400	Newmarket	704	Hobson Ward	7	Auckland City	02	Auckland Region	2.66887e+06	6.48014e+06	1	451000	7	1002	43	2
1500700	48	548100	Parkvale	3005	Hastings Ward	30	Hastings District	06	Hawke's Bay Region	2.84046e+06	6.16614e+06	1	1500700	8	1048	22	3
451600	39	515902	Parnell West	704	Hobson Ward	7	Auckland City	02	Auckland Region	2.66927e+06	6.48072e+06	1	451600	7	1020	14	2
1369200	105	544600	Gisborne Central	2807	Gisborne Ward	28	Gisborne District	05	Gisborne Region	2.94638e+06	6.27084e+06	1	1369200	10	1160	47	3
1369300	132	544600	Gisborne Central	2807	Gisborne Ward	28	Gisborne District	05	Gisborne Region	2.94631e+06	6.27074e+06	1	1369300	8	1061	59	3
1501100	165	548100	Parkvale	3005	Hastings Ward	30	Hastings District	06	Hawke's Bay Region	2.84054e+06	6.16584e+06	1	1501100	5	958	58	2
1500500	48	548100	Parkvale	3005	Hastings Ward	30	Hastings District	06	Hawke's Bay Region	2.84027e+06	6.16601e+06	1	1500500	8	1048	22	3
449600	90	517400	Newmarket	704	Hobson Ward	7	Auckland City	02	Auckland Region	2.6681e+06	6.48056e+06	1	449600	6	996	31	2
450901	15	517400	Newmarket	704	Hobson Ward	7	Auckland City	02	Auckland Region	2.66906e+06	6.48026e+06	1	450901	3	930	5	1
1366900	141	544300	Te Hapara	2807	Gisborne Ward	28	Gisborne District	05	Gisborne Region	2.94591e+06	6.27123e+06	1	1366900	8	1053	63	3
449800	132	517400	Newmarket	704	Hobson Ward	7	Auckland City	02	Auckland Region	2.66802e+06	6.48042e+06	1	449800	5	966	46	2
450902	108	517400	Newmarket	704	Hobson Ward	7	Auckland City	02	Auckland Region	2.66919e+06	6.48018e+06	1	450902	4	945	38	2
450100	69	517400	Newmarket	704	Hobson Ward	7	Auckland City	02	Auckland Region	2.66852e+06	6.48028e+06	1	450100	6	996	24	2
450000	105	517400	Newmarket	704	Hobson Ward	7	Auckland City	02	Auckland Region	2.66817e+06	6.48035e+06	1	450000	8	1043	47	3
450200	132	517400	Newmarket	704	Hobson Ward	7	Auckland City	02	Auckland Region	2.66845e+06	6.48001e+06	1	450200	5	971	46	2
450300	24	517400	Newmarket	704	Hobson Ward	7	Auckland City	02	Auckland Region	2.66859e+06	6.48001e+06	1	450300	8	1043	11	3
450400	216	517400	Newmarket	704	Hobson Ward	7	Auckland City	02	Auckland Region	2.66876e+06	6.48041e+06	1	450400	3	927	71	1
1499200	63	548100	Parkvale	3005	Hastings Ward	30	Hastings District	06	Hawke's Bay Region	2.84101e+06	6.166e+06	1	1499200	4	946	22	2
450500	84	517400	Newmarket	704	Hobson Ward	7	Auckland City	02	Auckland Region	2.66886e+06	6.48039e+06	1	450500	7	1005	29	2
1761100	51	560422	Tokorangi-Hiwinui	3901	Kiwitea-Pohangina Ward	39	Manawatu District	08	Manawatu-Wanganui Region	2.7359e+06	6.11446e+06	1	1761100	3	919	17	1
450800	96	517400	Newmarket	704	Hobson Ward	7	Auckland City	02	Auckland Region	2.66918e+06	6.4804e+06	1	450800	3	930	32	1
453300	69	515902	Parnell West	704	Hobson Ward	7	Auckland City	02	Auckland Region	2.6692e+06	6.48178e+06	1	453300	2	913	23	1
454400	129	515902	Parnell West	704	Hobson Ward	7	Auckland City	02	Auckland Region	2.66931e+06	6.48123e+06	1	454400	2	903	43	1
1372000	15	544600	Gisborne Central	2807	Gisborne Ward	28	Gisborne District	05	Gisborne Region	2.94731e+06	6.26935e+06	1	1372000	9	1079	7	3
1370300	3	544600	Gisborne Central	2807	Gisborne Ward	28	Gisborne District	05	Gisborne Region	2.94659e+06	6.26935e+06	1	1370300	7	1003	1	2
1371500	9	544600	Gisborne Central	2807	Gisborne Ward	28	Gisborne District	05	Gisborne Region	2.94712e+06	6.26947e+06	1	1371500	9	1079	4	3
453102	231	515902	Parnell West	704	Hobson Ward	7	Auckland City	02	Auckland Region	2.66908e+06	6.4819e+06	1	453102	2	913	76	1
1502100	72	548300	Akina	3005	Hastings Ward	30	Hastings District	06	Hawke's Bay Region	2.83997e+06	6.16571e+06	1	1502100	7	1006	25	2
453101	111	515902	Parnell West	704	Hobson Ward	7	Auckland City	02	Auckland Region	2.66906e+06	6.482e+06	1	453101	3	931	37	1
1764700	108	560730	Feilding Central	3903	Feilding Ward	39	Manawatu District	08	Manawatu-Wanganui Region	2.72893e+06	6.1058e+06	1	1764700	5	959	38	2
1765100	207	560720	Feilding West	3903	Feilding Ward	39	Manawatu District	08	Manawatu-Wanganui Region	2.72767e+06	6.10575e+06	1	1765100	5	964	72	2
1501800	153	548300	Akina	3005	Hastings Ward	30	Hastings District	06	Hawke's Bay Region	2.8402e+06	6.16548e+06	1	1501800	7	1018	54	2
1502300	126	548300	Akina	3005	Hastings Ward	30	Hastings District	06	Hawke's Bay Region	2.83976e+06	6.16558e+06	1	1502300	9	1121	57	3
1765201	81	560720	Feilding West	3903	Feilding Ward	39	Manawatu District	08	Manawatu-Wanganui Region	2.72765e+06	6.10557e+06	1	1765201	4	941	28	2
1765202	102	560720	Feilding West	3903	Feilding Ward	39	Manawatu District	08	Manawatu-Wanganui Region	2.72783e+06	6.10555e+06	1	1765202	4	941	36	2
1370600	9	544600	Gisborne Central	2807	Gisborne Ward	28	Gisborne District	05	Gisborne Region	2.94715e+06	6.26985e+06	1	1370600	9	1079	4	3
1502700	138	548300	Akina	3005	Hastings Ward	30	Hastings District	06	Hawke's Bay Region	2.8407e+06	6.16526e+06	1	1502700	7	1006	48	2
1502500	87	548300	Akina	3005	Hastings Ward	30	Hastings District	06	Hawke's Bay Region	2.84041e+06	6.16531e+06	1	1502500	7	1021	30	2
451500	57	515902	Parnell West	704	Hobson Ward	7	Auckland City	02	Auckland Region	2.66929e+06	6.48102e+06	1	451500	1	894	19	1
451400	3	515902	Parnell West	704	Hobson Ward	7	Auckland City	02	Auckland Region	2.66855e+06	6.48145e+06	1	451400	1	894	1	1
451900	9	515902	Parnell West	704	Hobson Ward	7	Auckland City	02	Auckland Region	2.66908e+06	6.48055e+06	1	451900	1	894	3	1
1501200	165	548100	Parkvale	3005	Hastings Ward	30	Hastings District	06	Hawke's Bay Region	2.84045e+06	6.16577e+06	1	1501200	8	1048	74	3
1500100	207	548100	Parkvale	3005	Hastings Ward	30	Hastings District	06	Hawke's Bay Region	2.84105e+06	6.16581e+06	1	1500100	7	1015	72	2
452200	141	515902	Parnell West	704	Hobson Ward	7	Auckland City	02	Auckland Region	2.66887e+06	6.48178e+06	1	452200	10	1268	63	3
452500	120	515902	Parnell West	704	Hobson Ward	7	Auckland City	02	Auckland Region	2.66895e+06	6.48162e+06	1	452500	4	944	42	2
1761804	39	560740	Feilding East	3903	Feilding Ward	39	Manawatu District	08	Manawatu-Wanganui Region	2.73026e+06	6.10717e+06	1	1761804	6	987	14	2
1368800	192	544600	Gisborne Central	2807	Gisborne Ward	28	Gisborne District	05	Gisborne Region	2.94645e+06	6.2711e+06	1	1368800	8	1043	86	3
1499600	84	548100	Parkvale	3005	Hastings Ward	30	Hastings District	06	Hawke's Bay Region	2.84078e+06	6.16631e+06	1	1499600	7	1020	29	2
1500400	153	548100	Parkvale	3005	Hastings Ward	30	Hastings District	06	Hawke's Bay Region	2.8411e+06	6.16561e+06	1	1500400	4	948	54	2
1500800	78	548100	Parkvale	3005	Hastings Ward	30	Hastings District	06	Hawke's Bay Region	2.84059e+06	6.16618e+06	1	1500800	7	1004	27	2
452600	33	515902	Parnell West	704	Hobson Ward	7	Auckland City	02	Auckland Region	2.66907e+06	6.48149e+06	1	452600	4	945	12	2
1500300	258	548100	Parkvale	3005	Hastings Ward	30	Hastings District	06	Hawke's Bay Region	2.8409e+06	6.16543e+06	1	1500300	8	1031	116	3
452100	240	515902	Parnell West	704	Hobson Ward	7	Auckland City	02	Auckland Region	2.66929e+06	6.48081e+06	1	452100	7	1020	84	2
452700	78	515902	Parnell West	704	Hobson Ward	7	Auckland City	02	Auckland Region	2.669e+06	6.48148e+06	1	452700	4	945	27	2
451700	72	515902	Parnell West	704	Hobson Ward	7	Auckland City	02	Auckland Region	2.66918e+06	6.48064e+06	1	451700	1	894	24	1
451300	9	517400	Newmarket	704	Hobson Ward	7	Auckland City	02	Auckland Region	2.66881e+06	6.47979e+06	1	451300	7	1002	3	2
1372200	165	544600	Gisborne Central	2807	Gisborne Ward	28	Gisborne District	05	Gisborne Region	2.94714e+06	6.27027e+06	1	1372200	10	1195	74	3
1503400	81	548300	Akina	3005	Hastings Ward	30	Hastings District	06	Hawke's Bay Region	2.83957e+06	6.16573e+06	1	1503400	8	1053	36	3
1583201	75	551501	Lynmouth	3301	New Plymouth City Ward	33	New Plymouth District	07	Taranaki Region	2.60052e+06	6.23663e+06	1	1583201	10	1196	34	3
1765500	27	560720	Feilding West	3903	Feilding Ward	39	Manawatu District	08	Manawatu-Wanganui Region	2.72825e+06	6.1059e+06	1	1765500	10	1243	12	3
1765300	105	560720	Feilding West	3903	Feilding Ward	39	Manawatu District	08	Manawatu-Wanganui Region	2.72797e+06	6.10586e+06	1	1765300	8	1045	47	3
1372400	3	544600	Gisborne Central	2807	Gisborne Ward	28	Gisborne District	05	Gisborne Region	2.94695e+06	6.27007e+06	1	1372400	8	1052	1	3
1372300	3	544600	Gisborne Central	2807	Gisborne Ward	28	Gisborne District	05	Gisborne Region	2.9472e+06	6.27009e+06	1	1372300	10	1195	1	3
61803	183	502202	Tikipunga East	204	Denby Ward	2	Whangarei District	01	Northland Region	2.63137e+06	6.61198e+06	1	61803	10	1253	82	3
1474104	321	548612	Lochain	3006	Flaxmere Ward	30	Hastings District	06	Hawke's Bay Region	2.83464e+06	6.16912e+06	1	1474104	9	1117	144	3
1765700	6	560720	Feilding West	3903	Feilding Ward	39	Manawatu District	08	Manawatu-Wanganui Region	2.72809e+06	6.10568e+06	1	1765700	8	1045	3	3
1372500	6	544600	Gisborne Central	2807	Gisborne Ward	28	Gisborne District	05	Gisborne Region	2.94704e+06	6.26994e+06	1	1372500	7	1029	2	2
1373300	102	544600	Gisborne Central	2807	Gisborne Ward	28	Gisborne District	05	Gisborne Region	2.9467e+06	6.27076e+06	1	1373300	9	1136	46	3
1503200	210	548300	Akina	3005	Hastings Ward	30	Hastings District	06	Hawke's Bay Region	2.83936e+06	6.16573e+06	1	1503200	7	1024	74	2
61901	177	501814	Punaruku-Kiripaka	203	Coastal Ward	2	Whangarei District	01	Northland Region	2.6358e+06	6.61455e+06	1	61901	1	892	58	1
1370800	3	544600	Gisborne Central	2807	Gisborne Ward	28	Gisborne District	05	Gisborne Region	2.94692e+06	6.26964e+06	1	1370800	9	1079	1	3
1371100	6	544600	Gisborne Central	2807	Gisborne Ward	28	Gisborne District	05	Gisborne Region	2.94716e+06	6.26969e+06	1	1371100	9	1079	3	3
1371300	6	544600	Gisborne Central	2807	Gisborne Ward	28	Gisborne District	05	Gisborne Region	2.94731e+06	6.26968e+06	1	1371300	9	1079	3	3
1371700	3	544600	Gisborne Central	2807	Gisborne Ward	28	Gisborne District	05	Gisborne Region	2.94739e+06	6.26958e+06	1	1371700	9	1079	1	3
1503000	96	548300	Akina	3005	Hastings Ward	30	Hastings District	06	Hawke's Bay Region	2.84021e+06	6.16481e+06	1	1503000	9	1132	43	3
1502900	93	548300	Akina	3005	Hastings Ward	30	Hastings District	06	Hawke's Bay Region	2.84028e+06	6.16495e+06	1	1502900	9	1132	42	3
1501500	87	548300	Akina	3005	Hastings Ward	30	Hastings District	06	Hawke's Bay Region	2.84013e+06	6.1659e+06	1	1501500	7	1006	30	2
1501300	96	548100	Parkvale	3005	Hastings Ward	30	Hastings District	06	Hawke's Bay Region	2.84079e+06	6.16582e+06	1	1501300	4	947	34	2
454300	174	515902	Parnell West	704	Hobson Ward	7	Auckland City	02	Auckland Region	2.66928e+06	6.48149e+06	1	454300	3	927	57	1
453700	135	515902	Parnell West	704	Hobson Ward	7	Auckland City	02	Auckland Region	2.66924e+06	6.48166e+06	1	453700	6	977	47	2
1764800	90	560730	Feilding Central	3903	Feilding Ward	39	Manawatu District	08	Manawatu-Wanganui Region	2.72879e+06	6.10593e+06	1	1764800	7	1013	31	2
1430100	33	546901	Nelson Park	3199	Area Outside Ward	31	Napier City	06	Hawke's Bay Region	2.84672e+06	6.18256e+06	1	1430100	9	1083	15	3
1502200	75	548300	Akina	3005	Hastings Ward	30	Hastings District	06	Hawke's Bay Region	2.8399e+06	6.16564e+06	1	1502200	9	1121	34	3
1502000	162	548300	Akina	3005	Hastings Ward	30	Hastings District	06	Hawke's Bay Region	2.8404e+06	6.16564e+06	1	1502000	8	1070	73	3
1501900	153	548300	Akina	3005	Hastings Ward	30	Hastings District	06	Hawke's Bay Region	2.8403e+06	6.16556e+06	1	1501900	8	1065	69	3
1501400	177	548100	Parkvale	3005	Hastings Ward	30	Hastings District	06	Hawke's Bay Region	2.84076e+06	6.16558e+06	1	1501400	7	1018	62	2
1764900	78	560730	Feilding Central	3903	Feilding Ward	39	Manawatu District	08	Manawatu-Wanganui Region	2.72878e+06	6.10572e+06	1	1764900	7	1013	27	2
1370500	33	544600	Gisborne Central	2807	Gisborne Ward	28	Gisborne District	05	Gisborne Region	2.9473e+06	6.26996e+06	1	1370500	9	1079	15	3
453800	54	515902	Parnell West	704	Hobson Ward	7	Auckland City	02	Auckland Region	2.66916e+06	6.48144e+06	1	453800	6	977	19	2
1502600	117	548300	Akina	3005	Hastings Ward	30	Hastings District	06	Hawke's Bay Region	2.84058e+06	6.16542e+06	1	1502600	8	1050	53	3
453400	57	515902	Parnell West	704	Hobson Ward	7	Auckland City	02	Auckland Region	2.66909e+06	6.48178e+06	1	453400	3	924	19	1
1371000	6	544600	Gisborne Central	2807	Gisborne Ward	28	Gisborne District	05	Gisborne Region	2.94723e+06	6.26975e+06	1	1371000	9	1079	3	3
453500	9	515902	Parnell West	704	Hobson Ward	7	Auckland City	02	Auckland Region	2.66904e+06	6.48175e+06	1	453500	3	924	3	1
452900	129	515902	Parnell West	704	Hobson Ward	7	Auckland City	02	Auckland Region	2.66911e+06	6.48122e+06	1	452900	4	939	45	2
1502800	183	548300	Akina	3005	Hastings Ward	30	Hastings District	06	Hawke's Bay Region	2.84048e+06	6.16509e+06	1	1502800	8	1042	82	3
453600	111	515902	Parnell West	704	Hobson Ward	7	Auckland City	02	Auckland Region	2.66914e+06	6.48164e+06	1	453600	3	924	37	1
452800	42	515902	Parnell West	704	Hobson Ward	7	Auckland City	02	Auckland Region	2.66914e+06	6.48131e+06	1	452800	4	939	15	2
453103	111	515902	Parnell West	704	Hobson Ward	7	Auckland City	02	Auckland Region	2.66924e+06	6.48191e+06	1	453103	2	912	37	1
1371400	30	544600	Gisborne Central	2807	Gisborne Ward	28	Gisborne District	05	Gisborne Region	2.94723e+06	6.26958e+06	1	1371400	9	1079	14	3
453000	156	515902	Parnell West	704	Hobson Ward	7	Auckland City	02	Auckland Region	2.66896e+06	6.48196e+06	1	453000	2	913	51	1
1501600	156	548300	Akina	3005	Hastings Ward	30	Hastings District	06	Hawke's Bay Region	2.84014e+06	6.16579e+06	1	1501600	6	990	55	2
64100	15	502001	Springs Flat	202	Hikurangi Ward	2	Whangarei District	01	Northland Region	2.62812e+06	6.6166e+06	1	64100	4	948	5	2
1768500	96	560730	Feilding Central	3903	Feilding Ward	39	Manawatu District	08	Manawatu-Wanganui Region	2.72892e+06	6.10672e+06	1	1768500	8	1068	43	3
1505200	81	548810	Anderson Park	3008	Havelock North Ward	30	Hastings District	06	Hawke's Bay Region	2.84236e+06	6.16351e+06	1	1505200	5	957	28	2
458000	111	515700	Epsom North	704	Hobson Ward	7	Auckland City	02	Auckland Region	2.66844e+06	6.47853e+06	1	458000	8	1068	50	3
64200	39	502001	Springs Flat	202	Hikurangi Ward	2	Whangarei District	01	Northland Region	2.6281e+06	6.61799e+06	1	64200	5	974	14	2
63805	51	502001	Springs Flat	204	Denby Ward	2	Whangarei District	01	Northland Region	2.62834e+06	6.61347e+06	1	63805	3	925	17	1
1373600	87	544600	Gisborne Central	2807	Gisborne Ward	28	Gisborne District	05	Gisborne Region	2.94659e+06	6.27066e+06	1	1373600	10	1178	39	3
1373400	117	544600	Gisborne Central	2807	Gisborne Ward	28	Gisborne District	05	Gisborne Region	2.9468e+06	6.27056e+06	1	1373400	6	994	41	2
1505700	54	548810	Anderson Park	3008	Havelock North Ward	30	Hastings District	06	Hawke's Bay Region	2.84234e+06	6.16318e+06	1	1505700	7	1023	19	2
1504600	123	548300	Akina	3005	Hastings Ward	30	Hastings District	06	Hawke's Bay Region	2.84005e+06	6.16481e+06	1	1504600	10	1148	55	3
1504400	141	548300	Akina	3005	Hastings Ward	30	Hastings District	06	Hawke's Bay Region	2.83992e+06	6.16492e+06	1	1504400	5	971	49	2
61802	132	502202	Tikipunga East	204	Denby Ward	2	Whangarei District	01	Northland Region	2.63154e+06	6.61176e+06	1	61802	10	1253	59	3
1372100	39	544600	Gisborne Central	2807	Gisborne Ward	28	Gisborne District	05	Gisborne Region	2.94718e+06	6.26917e+06	1	1372100	9	1079	18	3
1503300	87	548300	Akina	3005	Hastings Ward	30	Hastings District	06	Hawke's Bay Region	2.83949e+06	6.16568e+06	1	1503300	8	1053	39	3
1503100	174	548300	Akina	3005	Hastings Ward	30	Hastings District	06	Hawke's Bay Region	2.83953e+06	6.16602e+06	1	1503100	10	1214	78	3
1765600	9	560720	Feilding West	3903	Feilding Ward	39	Manawatu District	08	Manawatu-Wanganui Region	2.72825e+06	6.10578e+06	1	1765600	7	1006	3	2
1503700	84	548300	Akina	3005	Hastings Ward	30	Hastings District	06	Hawke's Bay Region	2.83974e+06	6.16547e+06	1	1503700	6	984	29	2
1765800	3	560720	Feilding West	3903	Feilding Ward	39	Manawatu District	08	Manawatu-Wanganui Region	2.72817e+06	6.10556e+06	1	1765800	8	1045	1	3
1766100	75	560720	Feilding West	3903	Feilding Ward	39	Manawatu District	08	Manawatu-Wanganui Region	2.72803e+06	6.10539e+06	1	1766100	10	1243	34	3
1504500	177	548300	Akina	3005	Hastings Ward	30	Hastings District	06	Hawke's Bay Region	2.84012e+06	6.16508e+06	1	1504500	9	1107	80	3
1373700	15	544600	Gisborne Central	2807	Gisborne Ward	28	Gisborne District	05	Gisborne Region	2.9466e+06	6.27045e+06	1	1373700	10	1269	7	3
1373500	108	544600	Gisborne Central	2807	Gisborne Ward	28	Gisborne District	05	Gisborne Region	2.94706e+06	6.27049e+06	1	1373500	9	1088	49	3
61801	51	501814	Punaruku-Kiripaka	204	Denby Ward	2	Whangarei District	01	Northland Region	2.63198e+06	6.61214e+06	1	61801	7	1012	18	2
1504700	63	548300	Akina	3005	Hastings Ward	30	Hastings District	06	Hawke's Bay Region	2.84004e+06	6.16467e+06	1	1504700	10	1148	28	3
1503500	102	548300	Akina	3005	Hastings Ward	30	Hastings District	06	Hawke's Bay Region	2.83966e+06	6.16579e+06	1	1503500	6	984	36	2
491000	84	516001	Mt Hobson	704	Hobson Ward	7	Auckland City	02	Auckland Region	2.66924e+06	6.47915e+06	1	491000	6	989	29	2
1376500	63	544900	Riverdale	2807	Gisborne Ward	28	Gisborne District	05	Gisborne Region	2.94561e+06	6.27275e+06	1	1376500	10	1222	28	3
1376603	324	544900	Riverdale	2807	Gisborne Ward	28	Gisborne District	05	Gisborne Region	2.94502e+06	6.27283e+06	1	1376603	2	908	107	1
458100	129	515700	Epsom North	704	Hobson Ward	7	Auckland City	02	Auckland Region	2.6686e+06	6.47849e+06	1	458100	5	971	45	2
2294900	6	581230	Blenheim Central	5304	Blenheim Ward	53	Marlborough District	18	Marlborough Region	2.59002e+06	5.9661e+06	1	2294900	7	1023	2	2
1376400	96	544900	Riverdale	2807	Gisborne Ward	28	Gisborne District	05	Gisborne Region	2.94549e+06	6.27262e+06	1	1376400	10	1222	43	3
1508200	234	548832	Havelock North Central	3008	Havelock North Ward	30	Hastings District	06	Hawke's Bay Region	2.84334e+06	6.16341e+06	1	1508200	3	927	77	1
1377400	195	544200	Mangapapa	2807	Gisborne Ward	28	Gisborne District	05	Gisborne Region	2.94651e+06	6.27209e+06	1	1377400	7	1006	68	2
63705	114	502001	Springs Flat	204	Denby Ward	2	Whangarei District	01	Northland Region	2.62815e+06	6.61351e+06	1	63705	8	1038	51	3
1505900	135	548810	Anderson Park	3008	Havelock North Ward	30	Hastings District	06	Hawke's Bay Region	2.84209e+06	6.1629e+06	1	1505900	7	1011	47	2
1506000	126	548810	Anderson Park	3008	Havelock North Ward	30	Hastings District	06	Hawke's Bay Region	2.84193e+06	6.16296e+06	1	1506000	5	970	44	2
1505500	108	548810	Anderson Park	3008	Havelock North Ward	30	Hastings District	06	Hawke's Bay Region	2.84182e+06	6.16292e+06	1	1505500	6	986	38	2
63704	120	502001	Springs Flat	204	Denby Ward	2	Whangarei District	01	Northland Region	2.6281e+06	6.61404e+06	1	63704	8	1042	54	3
1373900	18	544600	Gisborne Central	2807	Gisborne Ward	28	Gisborne District	05	Gisborne Region	2.9468e+06	6.27028e+06	1	1373900	10	1269	8	3
1373800	144	544600	Gisborne Central	2807	Gisborne Ward	28	Gisborne District	05	Gisborne Region	2.94693e+06	6.27038e+06	1	1373800	10	1269	65	3
457700	105	515700	Epsom North	704	Hobson Ward	7	Auckland City	02	Auckland Region	2.66858e+06	6.4789e+06	1	457700	7	1011	37	2
457800	219	515700	Epsom North	704	Hobson Ward	7	Auckland City	02	Auckland Region	2.66858e+06	6.47876e+06	1	457800	7	999	77	2
457600	96	515700	Epsom North	704	Hobson Ward	7	Auckland City	02	Auckland Region	2.66833e+06	6.47897e+06	1	457600	7	1011	34	2
1768400	81	560730	Feilding Central	3903	Feilding Ward	39	Manawatu District	08	Manawatu-Wanganui Region	2.7288e+06	6.10661e+06	1	1768400	8	1033	36	3
63804	171	502001	Springs Flat	204	Denby Ward	2	Whangarei District	01	Northland Region	2.62802e+06	6.61459e+06	1	63804	7	1027	60	2
457900	192	515700	Epsom North	704	Hobson Ward	7	Auckland City	02	Auckland Region	2.66855e+06	6.47865e+06	1	457900	5	969	67	2
1505000	156	548810	Anderson Park	3008	Havelock North Ward	30	Hastings District	06	Hawke's Bay Region	2.84205e+06	6.16331e+06	1	1505000	7	1023	55	2
1505300	138	548810	Anderson Park	3008	Havelock North Ward	30	Hastings District	06	Hawke's Bay Region	2.84182e+06	6.16338e+06	1	1505300	9	1085	62	3
1504900	168	548810	Anderson Park	3008	Havelock North Ward	30	Hastings District	06	Hawke's Bay Region	2.8417e+06	6.16345e+06	1	1504900	10	1208	76	3
1505800	120	548810	Anderson Park	3008	Havelock North Ward	30	Hastings District	06	Hawke's Bay Region	2.84219e+06	6.1631e+06	1	1505800	7	1023	42	2
1505600	114	548810	Anderson Park	3008	Havelock North Ward	30	Hastings District	06	Hawke's Bay Region	2.8419e+06	6.1631e+06	1	1505600	4	952	40	2
1505400	75	548810	Anderson Park	3008	Havelock North Ward	30	Hastings District	06	Hawke's Bay Region	2.8418e+06	6.16322e+06	1	1505400	9	1085	34	3
1377900	120	544200	Mangapapa	2807	Gisborne Ward	28	Gisborne District	05	Gisborne Region	2.9459e+06	6.27186e+06	1	1377900	10	1384	54	3
1378100	168	544200	Mangapapa	2807	Gisborne Ward	28	Gisborne District	05	Gisborne Region	2.94641e+06	6.27185e+06	1	1378100	6	996	59	2
1377702	129	544200	Mangapapa	2807	Gisborne Ward	28	Gisborne District	05	Gisborne Region	2.94606e+06	6.27182e+06	1	1377702	10	1191	58	3
1771100	81	560710	Feilding North	3903	Feilding Ward	39	Manawatu District	08	Manawatu-Wanganui Region	2.72978e+06	6.10677e+06	1	1771100	8	1070	36	3
1772000	66	560730	Feilding Central	3903	Feilding Ward	39	Manawatu District	08	Manawatu-Wanganui Region	2.7291e+06	6.10651e+06	1	1772000	9	1137	30	3
1771200	129	560730	Feilding Central	3903	Feilding Ward	39	Manawatu District	08	Manawatu-Wanganui Region	2.72951e+06	6.10652e+06	1	1771200	7	1010	45	2
1771900	87	560730	Feilding Central	3903	Feilding Ward	39	Manawatu District	08	Manawatu-Wanganui Region	2.72886e+06	6.10646e+06	1	1771900	9	1137	39	3
1379202	102	544200	Mangapapa	2807	Gisborne Ward	28	Gisborne District	05	Gisborne Region	2.9471e+06	6.27146e+06	1	1379202	5	957	36	2
1509600	6	548831	Te Mata	3008	Havelock North Ward	30	Hastings District	06	Hawke's Bay Region	2.84258e+06	6.16355e+06	1	1509600	3	929	2	1
1510200	189	548832	Havelock North Central	3008	Havelock North Ward	30	Hastings District	06	Hawke's Bay Region	2.84352e+06	6.16344e+06	1	1510200	3	919	62	1
2295000	6	581230	Blenheim Central	5304	Blenheim Ward	53	Marlborough District	18	Marlborough Region	2.59007e+06	5.96582e+06	1	2295000	7	1023	2	2
2296300	258	581230	Blenheim Central	5304	Blenheim Ward	53	Marlborough District	18	Marlborough Region	2.59044e+06	5.96587e+06	1	2296300	5	960	90	2
1378800	120	544200	Mangapapa	2807	Gisborne Ward	28	Gisborne District	05	Gisborne Region	2.94703e+06	6.27136e+06	1	1378800	8	1042	54	3
1378300	159	544200	Mangapapa	2807	Gisborne Ward	28	Gisborne District	05	Gisborne Region	2.94658e+06	6.27145e+06	1	1378300	9	1072	72	3
1508300	27	548832	Havelock North Central	3008	Havelock North Ward	30	Hastings District	06	Hawke's Bay Region	2.84267e+06	6.16316e+06	1	1508300	6	985	9	2
1508400	75	548832	Havelock North Central	3008	Havelock North Ward	30	Hastings District	06	Hawke's Bay Region	2.84291e+06	6.16334e+06	1	1508400	3	920	25	1
1507001	99	548821	Iona	3008	Havelock North Ward	30	Hastings District	06	Hawke's Bay Region	2.84247e+06	6.16307e+06	1	1507001	5	955	35	2
1770400	60	560710	Feilding North	3903	Feilding Ward	39	Manawatu District	08	Manawatu-Wanganui Region	2.7294e+06	6.10712e+06	1	1770400	9	1100	27	3
1768900	81	560730	Feilding Central	3903	Feilding Ward	39	Manawatu District	08	Manawatu-Wanganui Region	2.72844e+06	6.10618e+06	1	1768900	8	1033	36	3
458200	261	515700	Epsom North	704	Hobson Ward	7	Auckland City	02	Auckland Region	2.66849e+06	6.47839e+06	1	458200	5	962	91	2
1770500	114	560710	Feilding North	3903	Feilding Ward	39	Manawatu District	08	Manawatu-Wanganui Region	2.72935e+06	6.10695e+06	1	1770500	9	1092	51	3
1376900	156	544200	Mangapapa	2807	Gisborne Ward	28	Gisborne District	05	Gisborne Region	2.9459e+06	6.27266e+06	1	1376900	8	1057	70	3
1769000	177	560730	Feilding Central	3903	Feilding Ward	39	Manawatu District	08	Manawatu-Wanganui Region	2.72865e+06	6.10632e+06	1	1769000	5	973	62	2
2294800	18	581230	Blenheim Central	5304	Blenheim Ward	53	Marlborough District	18	Marlborough Region	2.58988e+06	5.9661e+06	1	2294800	7	1023	6	2
1376200	129	544900	Riverdale	2807	Gisborne Ward	28	Gisborne District	05	Gisborne Region	2.94577e+06	6.27233e+06	1	1376200	6	984	45	2
1377100	165	544200	Mangapapa	2807	Gisborne Ward	28	Gisborne District	05	Gisborne Region	2.94608e+06	6.27234e+06	1	1377100	8	1047	74	3
1376300	126	544900	Riverdale	2807	Gisborne Ward	28	Gisborne District	05	Gisborne Region	2.94558e+06	6.27248e+06	1	1376300	4	947	44	2
1376100	159	544900	Riverdale	2807	Gisborne Ward	28	Gisborne District	05	Gisborne Region	2.94547e+06	6.27232e+06	1	1376100	4	942	56	2
1508500	96	548832	Havelock North Central	3008	Havelock North Ward	30	Hastings District	06	Hawke's Bay Region	2.84307e+06	6.16339e+06	1	1508500	6	985	34	2
1376000	60	544900	Riverdale	2807	Gisborne Ward	28	Gisborne District	05	Gisborne Region	2.94544e+06	6.27216e+06	1	1376000	6	984	21	2
1770600	93	560710	Feilding North	3903	Feilding Ward	39	Manawatu District	08	Manawatu-Wanganui Region	2.72943e+06	6.10692e+06	1	1770600	9	1100	42	3
1380600	186	544500	Whataupoko	2807	Gisborne Ward	28	Gisborne District	05	Gisborne Region	2.94764e+06	6.27037e+06	1	1380600	7	1023	65	2
1379300	114	544200	Mangapapa	2807	Gisborne Ward	28	Gisborne District	05	Gisborne Region	2.94685e+06	6.27117e+06	1	1379300	4	944	40	2
1380700	150	544500	Whataupoko	2807	Gisborne Ward	28	Gisborne District	05	Gisborne Region	2.94761e+06	6.27018e+06	1	1380700	9	1088	68	3
1379400	135	544500	Whataupoko	2807	Gisborne Ward	28	Gisborne District	05	Gisborne Region	2.94751e+06	6.27089e+06	1	1379400	9	1080	61	3
1510500	162	548832	Havelock North Central	3008	Havelock North Ward	30	Hastings District	06	Hawke's Bay Region	2.84398e+06	6.1633e+06	1	1510500	2	909	53	1
2297500	42	581230	Blenheim Central	5304	Blenheim Ward	53	Marlborough District	18	Marlborough Region	2.58949e+06	5.96583e+06	1	2297500	7	1023	15	2
1380500	189	544500	Whataupoko	2807	Gisborne Ward	28	Gisborne District	05	Gisborne Region	2.94757e+06	6.27055e+06	1	1380500	7	1004	66	2
1380200	147	544500	Whataupoko	2807	Gisborne Ward	28	Gisborne District	05	Gisborne Region	2.94741e+06	6.27068e+06	1	1380200	7	1011	51	2
1377600	222	544200	Mangapapa	2807	Gisborne Ward	28	Gisborne District	05	Gisborne Region	2.94601e+06	6.27213e+06	1	1377600	9	1078	100	3
1508600	93	548832	Havelock North Central	3008	Havelock North Ward	30	Hastings District	06	Hawke's Bay Region	2.84327e+06	6.1632e+06	1	1508600	3	920	31	1
1772500	186	560740	Feilding East	3903	Feilding Ward	39	Manawatu District	08	Manawatu-Wanganui Region	2.72913e+06	6.1061e+06	1	1772500	4	948	65	2
1772200	66	560730	Feilding Central	3903	Feilding Ward	39	Manawatu District	08	Manawatu-Wanganui Region	2.72881e+06	6.10608e+06	1	1772200	9	1074	30	3
1379000	129	544200	Mangapapa	2807	Gisborne Ward	28	Gisborne District	05	Gisborne Region	2.94664e+06	6.27191e+06	1	1379000	9	1080	58	3
1377800	129	544200	Mangapapa	2807	Gisborne Ward	28	Gisborne District	05	Gisborne Region	2.94586e+06	6.27201e+06	1	1377800	10	1331	58	3
1377701	75	544200	Mangapapa	2807	Gisborne Ward	28	Gisborne District	05	Gisborne Region	2.94621e+06	6.27196e+06	1	1377701	10	1191	34	3
1772100	135	560730	Feilding Central	3903	Feilding Ward	39	Manawatu District	08	Manawatu-Wanganui Region	2.72854e+06	6.10601e+06	1	1772100	9	1075	61	3
1770800	120	560710	Feilding North	3903	Feilding Ward	39	Manawatu District	08	Manawatu-Wanganui Region	2.72958e+06	6.10685e+06	1	1770800	10	1277	54	3
1378900	99	544200	Mangapapa	2807	Gisborne Ward	28	Gisborne District	05	Gisborne Region	2.94691e+06	6.27169e+06	1	1378900	8	1056	45	3
1378500	114	544200	Mangapapa	2807	Gisborne Ward	28	Gisborne District	05	Gisborne Region	2.94616e+06	6.27167e+06	1	1378500	10	1141	51	3
1771800	102	560730	Feilding Central	3903	Feilding Ward	39	Manawatu District	08	Manawatu-Wanganui Region	2.72904e+06	6.10661e+06	1	1771800	9	1134	46	3
1771700	117	560730	Feilding Central	3903	Feilding Ward	39	Manawatu District	08	Manawatu-Wanganui Region	2.7293e+06	6.10668e+06	1	1771700	9	1074	53	3
1378400	135	544200	Mangapapa	2807	Gisborne Ward	28	Gisborne District	05	Gisborne Region	2.94639e+06	6.27157e+06	1	1378400	7	1006	47	2
1378200	117	544200	Mangapapa	2807	Gisborne Ward	28	Gisborne District	05	Gisborne Region	2.94668e+06	6.2716e+06	1	1378200	9	1129	53	3
1772400	165	560730	Feilding Central	3903	Feilding Ward	39	Manawatu District	08	Manawatu-Wanganui Region	2.72919e+06	6.10636e+06	1	1772400	8	1032	74	3
1772300	132	560730	Feilding Central	3903	Feilding Ward	39	Manawatu District	08	Manawatu-Wanganui Region	2.72897e+06	6.10623e+06	1	1772300	5	969	46	2
1378700	135	544200	Mangapapa	2807	Gisborne Ward	28	Gisborne District	05	Gisborne Region	2.94692e+06	6.27128e+06	1	1378700	8	1055	61	3
1509000	204	548832	Havelock North Central	3008	Havelock North Ward	30	Hastings District	06	Hawke's Bay Region	2.84308e+06	6.16312e+06	1	1509000	2	913	67	1
1508700	225	548832	Havelock North Central	3008	Havelock North Ward	30	Hastings District	06	Hawke's Bay Region	2.84353e+06	6.16292e+06	1	1508700	1	876	74	1
1770900	105	560710	Feilding North	3903	Feilding Ward	39	Manawatu District	08	Manawatu-Wanganui Region	2.72969e+06	6.10693e+06	1	1770900	9	1114	47	3
1770700	102	560710	Feilding North	3903	Feilding Ward	39	Manawatu District	08	Manawatu-Wanganui Region	2.72956e+06	6.10699e+06	1	1770700	10	1154	46	3
1771000	78	560710	Feilding North	3903	Feilding Ward	39	Manawatu District	08	Manawatu-Wanganui Region	2.72984e+06	6.10696e+06	1	1771000	8	1070	35	3
70904	195	501810	Maungatapere	201	Mangakahia-Maungatapere Ward	2	Whangarei District	01	Northland Region	2.62305e+06	6.60448e+06	1	70904	1	871	64	1
596300	51	519710	Onehunga North West	706	Tamaki-Maungakiekie Ward	7	Auckland City	02	Auckland Region	2.66865e+06	6.47499e+06	1	596300	7	1023	18	2
595500	180	519710	Onehunga North West	706	Tamaki-Maungakiekie Ward	7	Auckland City	02	Auckland Region	2.66908e+06	6.47471e+06	1	595500	6	990	63	2
2299500	3	581230	Blenheim Central	5304	Blenheim Ward	53	Marlborough District	18	Marlborough Region	2.59005e+06	5.96556e+06	1	2299500	7	1012	1	2
2299300	15	581230	Blenheim Central	5304	Blenheim Ward	53	Marlborough District	18	Marlborough Region	2.58992e+06	5.96563e+06	1	2299300	7	1012	5	2
2298900	6	581230	Blenheim Central	5304	Blenheim Ward	53	Marlborough District	18	Marlborough Region	2.58974e+06	5.9655e+06	1	2298900	7	1005	2	2
2298700	12	581230	Blenheim Central	5304	Blenheim Ward	53	Marlborough District	18	Marlborough Region	2.58962e+06	5.96563e+06	1	2298700	7	1005	4	2
2299400	6	581230	Blenheim Central	5304	Blenheim Ward	53	Marlborough District	18	Marlborough Region	2.58989e+06	5.96555e+06	1	2299400	7	1012	2	2
594902	177	519710	Onehunga North West	706	Tamaki-Maungakiekie Ward	7	Auckland City	02	Auckland Region	2.66902e+06	6.47507e+06	1	594902	8	1069	80	3
596401	39	519710	Onehunga North West	706	Tamaki-Maungakiekie Ward	7	Auckland City	02	Auckland Region	2.6686e+06	6.47489e+06	1	596401	7	1023	14	2
594800	120	519710	Onehunga North West	706	Tamaki-Maungakiekie Ward	7	Auckland City	02	Auckland Region	2.66879e+06	6.47513e+06	1	594800	6	976	42	2
596502	84	519710	Onehunga North West	706	Tamaki-Maungakiekie Ward	7	Auckland City	02	Auckland Region	2.66873e+06	6.47478e+06	1	596502	10	1175	38	3
72102	90	501810	Maungatapere	201	Mangakahia-Maungatapere Ward	2	Whangarei District	01	Northland Region	2.6207e+06	6.60368e+06	1	72102	7	1018	31	2
596501	111	519710	Onehunga North West	706	Tamaki-Maungakiekie Ward	7	Auckland City	02	Auckland Region	2.66857e+06	6.47477e+06	1	596501	10	1175	50	3
1510400	135	548832	Havelock North Central	3008	Havelock North Ward	30	Hastings District	06	Hawke's Bay Region	2.84383e+06	6.1633e+06	1	1510400	2	918	45	1
1510700	102	548832	Havelock North Central	3008	Havelock North Ward	30	Hastings District	06	Hawke's Bay Region	2.84431e+06	6.16332e+06	1	1510700	3	919	34	1
594500	201	519710	Onehunga North West	706	Tamaki-Maungakiekie Ward	7	Auckland City	02	Auckland Region	2.66888e+06	6.47543e+06	1	594500	5	968	70	2
2297100	84	581230	Blenheim Central	5304	Blenheim Ward	53	Marlborough District	18	Marlborough Region	2.58893e+06	5.96577e+06	1	2297100	8	1037	38	3
1379800	186	544500	Whataupoko	2807	Gisborne Ward	28	Gisborne District	05	Gisborne Region	2.94741e+06	6.27121e+06	1	1379800	6	998	65	2
2298400	129	581230	Blenheim Central	5304	Blenheim Ward	53	Marlborough District	18	Marlborough Region	2.58939e+06	5.96561e+06	1	2298400	7	1027	45	2
2298201	159	581230	Blenheim Central	5304	Blenheim Ward	53	Marlborough District	18	Marlborough Region	2.58916e+06	5.96556e+06	1	2298201	9	1087	72	3
2297900	171	581230	Blenheim Central	5304	Blenheim Ward	53	Marlborough District	18	Marlborough Region	2.58897e+06	5.96557e+06	1	2297900	6	987	60	2
1380400	162	544500	Whataupoko	2807	Gisborne Ward	28	Gisborne District	05	Gisborne Region	2.94715e+06	6.27104e+06	1	1380400	7	1025	57	2
594600	171	519710	Onehunga North West	706	Tamaki-Maungakiekie Ward	7	Auckland City	02	Auckland Region	2.66907e+06	6.47543e+06	1	594600	4	953	60	2
1380900	90	544500	Whataupoko	2807	Gisborne Ward	28	Gisborne District	05	Gisborne Region	2.94771e+06	6.26997e+06	1	1380900	5	964	31	2
1380800	72	544500	Whataupoko	2807	Gisborne Ward	28	Gisborne District	05	Gisborne Region	2.94759e+06	6.2699e+06	1	1380800	5	964	25	2
1380300	144	544500	Whataupoko	2807	Gisborne Ward	28	Gisborne District	05	Gisborne Region	2.94727e+06	6.27086e+06	1	1380300	5	969	50	2
69800	21	502001	Springs Flat	204	Denby Ward	2	Whangarei District	01	Northland Region	2.62789e+06	6.61309e+06	1	69800	2	913	7	1
2297200	150	581230	Blenheim Central	5304	Blenheim Ward	53	Marlborough District	18	Marlborough Region	2.58911e+06	5.96608e+06	1	2297200	8	1055	68	3
1510600	177	548832	Havelock North Central	3008	Havelock North Ward	30	Hastings District	06	Hawke's Bay Region	2.84416e+06	6.16332e+06	1	1510600	3	919	58	1
2297300	204	581230	Blenheim Central	5304	Blenheim Ward	53	Marlborough District	18	Marlborough Region	2.58925e+06	5.96581e+06	1	2297300	8	1068	92	3
2297600	15	581230	Blenheim Central	5304	Blenheim Ward	53	Marlborough District	18	Marlborough Region	2.58962e+06	5.96596e+06	1	2297600	7	1023	5	2
2297700	15	581230	Blenheim Central	5304	Blenheim Ward	53	Marlborough District	18	Marlborough Region	2.58974e+06	5.96575e+06	1	2297700	7	1023	5	2
1510800	129	548832	Havelock North Central	3008	Havelock North Ward	30	Hastings District	06	Hawke's Bay Region	2.84389e+06	6.16295e+06	1	1510800	2	901	43	1
597700	72	519810	Onehunga South West	706	Tamaki-Maungakiekie Ward	7	Auckland City	02	Auckland Region	2.66884e+06	6.47441e+06	1	597700	2	916	24	1
598001	69	519810	Onehunga South West	706	Tamaki-Maungakiekie Ward	7	Auckland City	02	Auckland Region	2.66867e+06	6.47419e+06	1	598001	2	916	23	1
597600	219	519810	Onehunga South West	706	Tamaki-Maungakiekie Ward	7	Auckland City	02	Auckland Region	2.6687e+06	6.47446e+06	1	597600	2	912	72	1
595400	105	519710	Onehunga North West	706	Tamaki-Maungakiekie Ward	7	Auckland City	02	Auckland Region	2.66902e+06	6.47493e+06	1	595400	7	1024	37	2
596100	159	519710	Onehunga North West	706	Tamaki-Maungakiekie Ward	7	Auckland City	02	Auckland Region	2.66849e+06	6.47505e+06	1	596100	7	1008	56	2
595200	228	519710	Onehunga North West	706	Tamaki-Maungakiekie Ward	7	Auckland City	02	Auckland Region	2.66879e+06	6.47499e+06	1	595200	8	1033	103	3
594901	132	519710	Onehunga North West	706	Tamaki-Maungakiekie Ward	7	Auckland City	02	Auckland Region	2.66897e+06	6.47523e+06	1	594901	5	968	46	2
594700	255	519710	Onehunga North West	706	Tamaki-Maungakiekie Ward	7	Auckland City	02	Auckland Region	2.6688e+06	6.47528e+06	1	594700	6	987	89	2
2299600	18	581230	Blenheim Central	5304	Blenheim Ward	53	Marlborough District	18	Marlborough Region	2.59038e+06	5.96555e+06	1	2299600	7	1012	6	2
1382200	267	544701	Kaiti North	2807	Gisborne Ward	28	Gisborne District	05	Gisborne Region	2.94793e+06	6.26972e+06	1	1382200	4	937	93	2
595300	321	519710	Onehunga North West	706	Tamaki-Maungakiekie Ward	7	Auckland City	02	Auckland Region	2.66887e+06	6.47475e+06	1	595300	8	1071	144	3
596402	21	519710	Onehunga North West	706	Tamaki-Maungakiekie Ward	7	Auckland City	02	Auckland Region	2.6687e+06	6.4749e+06	1	596402	7	1023	7	2
70802	39	501810	Maungatapere	201	Mangakahia-Maungatapere Ward	2	Whangarei District	01	Northland Region	2.62227e+06	6.60425e+06	1	70802	2	906	13	1
598400	216	519810	Onehunga South West	706	Tamaki-Maungakiekie Ward	7	Auckland City	02	Auckland Region	2.6691e+06	6.47425e+06	1	598400	7	1011	76	2
1122700	165	535241	Karapiro	1703	Maungatautari Ward	17	Waipa District	03	Waikato Region	2.73278e+06	6.36303e+06	1	1122700	1	896	54	1
1122600	15	535241	Karapiro	1703	Maungatautari Ward	17	Waipa District	03	Waikato Region	2.72928e+06	6.36456e+06	1	1122600	1	896	5	1
598100	120	519810	Onehunga South West	706	Tamaki-Maungakiekie Ward	7	Auckland City	02	Auckland Region	2.66884e+06	6.47423e+06	1	598100	5	957	42	2
1122500	75	535241	Karapiro	1703	Maungatautari Ward	17	Waipa District	03	Waikato Region	2.73455e+06	6.36662e+06	1	1122500	2	911	25	1
596600	132	519710	Onehunga North West	706	Tamaki-Maungakiekie Ward	7	Auckland City	02	Auckland Region	2.66868e+06	6.47465e+06	1	596600	5	962	46	2
597500	168	519810	Onehunga South West	706	Tamaki-Maungakiekie Ward	7	Auckland City	02	Auckland Region	2.66854e+06	6.47447e+06	1	597500	3	935	55	1
598002	42	519810	Onehunga South West	706	Tamaki-Maungakiekie Ward	7	Auckland City	02	Auckland Region	2.66877e+06	6.47427e+06	1	598002	5	954	15	2
862800	78	529900	Claudelands	1603	South Ward	16	Hamilton City	03	Waikato Region	2.71132e+06	6.37759e+06	1	862800	6	998	27	2
862900	78	529900	Claudelands	1603	South Ward	16	Hamilton City	03	Waikato Region	2.7114e+06	6.37761e+06	1	862900	6	976	27	2
863900	18	529900	Claudelands	1603	South Ward	16	Hamilton City	03	Waikato Region	2.71107e+06	6.378e+06	1	863900	4	943	6	2
862502	114	529900	Claudelands	1603	South Ward	16	Hamilton City	03	Waikato Region	2.71145e+06	6.37791e+06	1	862502	7	1026	40	2
863700	132	529900	Claudelands	1602	East Ward	16	Hamilton City	03	Waikato Region	2.71105e+06	6.37836e+06	1	863700	8	1069	59	3
862700	96	529900	Claudelands	1603	South Ward	16	Hamilton City	03	Waikato Region	2.71122e+06	6.37778e+06	1	862700	6	998	34	2
598300	171	519810	Onehunga South West	706	Tamaki-Maungakiekie Ward	7	Auckland City	02	Auckland Region	2.66906e+06	6.47452e+06	1	598300	4	952	60	2
1503900	159	548300	Akina	3005	Hastings Ward	30	Hastings District	06	Hawke's Bay Region	2.83957e+06	6.1654e+06	1	1503900	8	1059	72	3
598500	93	519810	Onehunga South West	706	Tamaki-Maungakiekie Ward	7	Auckland City	02	Auckland Region	2.66895e+06	6.47418e+06	1	598500	5	960	33	2
598600	54	519810	Onehunga South West	706	Tamaki-Maungakiekie Ward	7	Auckland City	02	Auckland Region	2.66911e+06	6.47412e+06	1	598600	5	960	19	2
74700	186	502005	Otaika-Portland	205	Okara Ward	2	Whangarei District	01	Northland Region	2.6295e+06	6.60332e+06	1	74700	6	977	65	2
864200	288	529900	Claudelands	1603	South Ward	16	Hamilton City	03	Waikato Region	2.71136e+06	6.37809e+06	1	864200	9	1115	130	3
2435801	15	585700	Hurunui	5805	Glenmark Ward	58	Hurunui District	13	Canterbury Region	2.4912e+06	5.79509e+06	1	2435801	6	989	5	2
863200	105	529900	Claudelands	1603	South Ward	16	Hamilton City	03	Waikato Region	2.71156e+06	6.37751e+06	1	863200	10	1172	47	3
863800	99	529900	Claudelands	1602	East Ward	16	Hamilton City	03	Waikato Region	2.71088e+06	6.37836e+06	1	863800	4	943	35	2
863600	159	529900	Claudelands	1602	East Ward	16	Hamilton City	03	Waikato Region	2.71128e+06	6.37845e+06	1	863600	6	994	56	2
2436202	15	585700	Hurunui	5805	Glenmark Ward	58	Hurunui District	13	Canterbury Region	2.49085e+06	5.79367e+06	1	2436202	6	989	5	2
862600	111	529900	Claudelands	1603	South Ward	16	Hamilton City	03	Waikato Region	2.71133e+06	6.37788e+06	1	862600	6	976	39	2
863000	213	529900	Claudelands	1603	South Ward	16	Hamilton City	03	Waikato Region	2.71159e+06	6.37771e+06	1	863000	6	990	75	2
1495200	126	548200	Hastings Central	3005	Hastings Ward	30	Hastings District	06	Hawke's Bay Region	2.84083e+06	6.16668e+06	1	1495200	8	1031	57	3
2439101	84	585803	Leithfield	5804	Amberley Ward	58	Hurunui District	13	Canterbury Region	2.48833e+06	5.77943e+06	1	2439101	2	906	28	1
2831102	21	600813	Cape Wanbrow	6802	Oamaru Ward	68	Waitaki District	14	Otago Region	2.35042e+06	5.56369e+06	1	2831102	1	894	7	1
1586000	72	551400	Moturoa	3301	New Plymouth City Ward	33	New Plymouth District	07	Taranaki Region	2.5997e+06	6.23698e+06	1	1586000	8	1032	32	3
864000	138	529900	Claudelands	1603	South Ward	16	Hamilton City	03	Waikato Region	2.71106e+06	6.37814e+06	1	864000	3	932	46	1
864100	231	529900	Claudelands	1603	South Ward	16	Hamilton City	03	Waikato Region	2.71132e+06	6.37823e+06	1	864100	9	1113	104	3
868200	153	529600	Chartwell	1602	East Ward	16	Hamilton City	03	Waikato Region	2.71058e+06	6.3785e+06	1	868200	1	895	50	1
868400	108	529600	Chartwell	1602	East Ward	16	Hamilton City	03	Waikato Region	2.70983e+06	6.38004e+06	1	868400	5	956	38	2
868000	183	529600	Chartwell	1602	East Ward	16	Hamilton City	03	Waikato Region	2.71047e+06	6.3788e+06	1	868000	1	884	60	1
869000	66	529600	Chartwell	1602	East Ward	16	Hamilton City	03	Waikato Region	2.70993e+06	6.37966e+06	1	869000	2	911	22	1
2441500	75	585802	Amberley	5804	Amberley Ward	58	Hurunui District	13	Canterbury Region	2.48846e+06	5.78428e+06	1	2441500	7	1003	26	2
2441400	210	585802	Amberley	5804	Amberley Ward	58	Hurunui District	13	Canterbury Region	2.48821e+06	5.78436e+06	1	2441400	5	964	74	2
2441701	42	585802	Amberley	5804	Amberley Ward	58	Hurunui District	13	Canterbury Region	2.48793e+06	5.78375e+06	1	2441701	8	1072	19	3
870200	138	529800	Clarkin	1602	East Ward	16	Hamilton City	03	Waikato Region	2.71119e+06	6.37863e+06	1	870200	8	1039	62	3
2443500	27	586306	Rangiora North	5903	Rangiora Ward	59	Waimakariri District	13	Canterbury Region	2.47685e+06	5.76709e+06	1	2443500	8	1044	12	3
2443600	27	586306	Rangiora North	5903	Rangiora Ward	59	Waimakariri District	13	Canterbury Region	2.47705e+06	5.76711e+06	1	2443600	8	1044	12	3
2443400	87	586306	Rangiora North	5903	Rangiora Ward	59	Waimakariri District	13	Canterbury Region	2.4767e+06	5.76705e+06	1	2443400	6	993	30	2
82900	30	502101	Kamo West	204	Denby Ward	2	Whangarei District	01	Northland Region	2.62841e+06	6.6121e+06	1	82900	7	1018	10	2
83200	147	502101	Kamo West	204	Denby Ward	2	Whangarei District	01	Northland Region	2.62809e+06	6.61274e+06	1	83200	4	949	51	2
869900	84	529800	Clarkin	1602	East Ward	16	Hamilton City	03	Waikato Region	2.71087e+06	6.37895e+06	1	869900	9	1093	38	3
83700	96	502102	Kamo East	204	Denby Ward	2	Whangarei District	01	Northland Region	2.62844e+06	6.61262e+06	1	83700	9	1074	43	3
1574000	75	551700	Westown	3301	New Plymouth City Ward	33	New Plymouth District	07	Taranaki Region	2.60243e+06	6.2371e+06	1	1574000	7	1025	26	2
83500	138	502102	Kamo East	204	Denby Ward	2	Whangarei District	01	Northland Region	2.62865e+06	6.61289e+06	1	83500	9	1094	62	3
83800	111	502102	Kamo East	204	Denby Ward	2	Whangarei District	01	Northland Region	2.6286e+06	6.61252e+06	1	83800	9	1115	50	3
870100	147	529800	Clarkin	1602	East Ward	16	Hamilton City	03	Waikato Region	2.71108e+06	6.37877e+06	1	870100	7	1023	51	2
869500	108	529800	Clarkin	1602	East Ward	16	Hamilton City	03	Waikato Region	2.71076e+06	6.37929e+06	1	869500	7	1002	38	2
869400	126	529600	Chartwell	1602	East Ward	16	Hamilton City	03	Waikato Region	2.71012e+06	6.37929e+06	1	869400	7	1003	44	2
2442500	228	586306	Rangiora North	5903	Rangiora Ward	59	Waimakariri District	13	Canterbury Region	2.47637e+06	5.7674e+06	1	2442500	5	973	80	2
2443100	189	586306	Rangiora North	5903	Rangiora Ward	59	Waimakariri District	13	Canterbury Region	2.47676e+06	5.76747e+06	1	2443100	5	962	66	2
2443000	201	586306	Rangiora North	5903	Rangiora Ward	59	Waimakariri District	13	Canterbury Region	2.47655e+06	5.7676e+06	1	2443000	7	1023	70	2
84600	129	502102	Kamo East	204	Denby Ward	2	Whangarei District	01	Northland Region	2.6286e+06	6.61236e+06	1	84600	7	1003	45	2
83300	171	502102	Kamo East	204	Denby Ward	2	Whangarei District	01	Northland Region	2.62844e+06	6.61286e+06	1	83300	9	1074	77	3
84700	63	502102	Kamo East	204	Denby Ward	2	Whangarei District	01	Northland Region	2.62859e+06	6.61219e+06	1	84700	8	1031	28	3
867800	171	529600	Chartwell	1602	East Ward	16	Hamilton City	03	Waikato Region	2.71025e+06	6.37907e+06	1	867800	4	935	60	2
869200	114	529600	Chartwell	1602	East Ward	16	Hamilton City	03	Waikato Region	2.71031e+06	6.3795e+06	1	869200	2	910	38	1
869100	36	529600	Chartwell	1602	East Ward	16	Hamilton City	03	Waikato Region	2.71002e+06	6.37946e+06	1	869100	2	910	12	1
2441000	105	585803	Leithfield	5804	Amberley Ward	58	Hurunui District	13	Canterbury Region	2.48848e+06	5.78118e+06	1	2441000	2	914	35	1
2441901	87	585802	Amberley	5804	Amberley Ward	58	Hurunui District	13	Canterbury Region	2.48801e+06	5.78276e+06	1	2441901	4	952	30	2
2442002	39	585802	Amberley	5804	Amberley Ward	58	Hurunui District	13	Canterbury Region	2.48855e+06	5.78306e+06	1	2442002	4	952	14	2
2442001	147	585802	Amberley	5804	Amberley Ward	58	Hurunui District	13	Canterbury Region	2.4882e+06	5.78318e+06	1	2442001	8	1033	66	3
868600	90	529600	Chartwell	1602	East Ward	16	Hamilton City	03	Waikato Region	2.70989e+06	6.3799e+06	1	868600	2	918	30	1
868501	171	529600	Chartwell	1602	East Ward	16	Hamilton City	03	Waikato Region	2.71004e+06	6.38029e+06	1	868501	1	895	56	1
868900	45	529600	Chartwell	1602	East Ward	16	Hamilton City	03	Waikato Region	2.71009e+06	6.37978e+06	1	868900	5	956	16	2
868502	135	529600	Chartwell	1602	East Ward	16	Hamilton City	03	Waikato Region	2.71021e+06	6.38023e+06	1	868502	2	912	45	1
868100	231	529600	Chartwell	1602	East Ward	16	Hamilton City	03	Waikato Region	2.71076e+06	6.37862e+06	1	868100	5	966	81	2
867900	165	529600	Chartwell	1602	East Ward	16	Hamilton City	03	Waikato Region	2.71042e+06	6.37917e+06	1	867900	1	891	54	1
868300	87	529600	Chartwell	1602	East Ward	16	Hamilton City	03	Waikato Region	2.71066e+06	6.37919e+06	1	868300	9	1098	39	3
2441703	69	585802	Amberley	5804	Amberley Ward	58	Hurunui District	13	Canterbury Region	2.48798e+06	5.78342e+06	1	2441703	8	1072	31	3
2441702	57	585802	Amberley	5804	Amberley Ward	58	Hurunui District	13	Canterbury Region	2.48776e+06	5.78361e+06	1	2441702	8	1072	26	3
2441605	72	585802	Amberley	5804	Amberley Ward	58	Hurunui District	13	Canterbury Region	2.48784e+06	5.78319e+06	1	2441605	7	1010	25	2
868700	174	529600	Chartwell	1602	East Ward	16	Hamilton City	03	Waikato Region	2.71013e+06	6.38e+06	1	868700	3	934	57	1
84900	111	502102	Kamo East	204	Denby Ward	2	Whangarei District	01	Northland Region	2.6289e+06	6.61191e+06	1	84900	2	913	37	1
85200	102	502102	Kamo East	204	Denby Ward	2	Whangarei District	01	Northland Region	2.62913e+06	6.61162e+06	1	85200	1	898	34	1
1587100	282	551400	Moturoa	3301	New Plymouth City Ward	33	New Plymouth District	07	Taranaki Region	2.60122e+06	6.23784e+06	1	1587100	5	964	99	2
85503	36	502101	Kamo West	204	Denby Ward	2	Whangarei District	01	Northland Region	2.62865e+06	6.61159e+06	1	85503	8	1063	16	3
2707100	201	596400	Lyttelton	6007	Banks Peninsula Ward	60	Christchurch City	13	Canterbury Region	2.48795e+06	5.73383e+06	1	2707100	4	947	70	2
2838300	87	601030	Oamaru Central	6802	Oamaru Ward	68	Waitaki District	14	Otago Region	2.34935e+06	5.5653e+06	1	2838300	5	971	30	2
2838700	84	601030	Oamaru Central	6802	Oamaru Ward	68	Waitaki District	14	Otago Region	2.34988e+06	5.56526e+06	1	2838700	7	1020	29	2
2445101	150	586302	Rangiora West	5903	Rangiora Ward	59	Waimakariri District	13	Canterbury Region	2.47693e+06	5.76657e+06	1	2445101	8	1051	68	3
2445102	75	586302	Rangiora West	5903	Rangiora Ward	59	Waimakariri District	13	Canterbury Region	2.47703e+06	5.76665e+06	1	2445102	8	1051	34	3
2445200	90	586303	Rangiora East	5903	Rangiora Ward	59	Waimakariri District	13	Canterbury Region	2.47712e+06	5.76663e+06	1	2445200	6	979	31	2
2444900	168	586302	Rangiora West	5903	Rangiora Ward	59	Waimakariri District	13	Canterbury Region	2.47666e+06	5.76634e+06	1	2444900	3	930	55	1
2707400	108	596400	Lyttelton	6007	Banks Peninsula Ward	60	Christchurch City	13	Canterbury Region	2.48782e+06	5.73418e+06	1	2707400	4	941	38	2
2838100	48	601040	Oamaru South	6802	Oamaru Ward	68	Waitaki District	14	Otago Region	2.35035e+06	5.56432e+06	1	2838100	4	941	17	2
2837600	42	601040	Oamaru South	6802	Oamaru Ward	68	Waitaki District	14	Otago Region	2.35008e+06	5.56493e+06	1	2837600	5	955	15	2
2837500	81	601040	Oamaru South	6802	Oamaru Ward	68	Waitaki District	14	Otago Region	2.34995e+06	5.56497e+06	1	2837500	8	1047	36	3
2445300	141	586302	Rangiora West	5903	Rangiora Ward	59	Waimakariri District	13	Canterbury Region	2.47675e+06	5.76621e+06	1	2445300	6	978	49	2
2445401	192	586302	Rangiora West	5903	Rangiora Ward	59	Waimakariri District	13	Canterbury Region	2.47705e+06	5.76623e+06	1	2445401	5	960	67	2
2445402	96	586303	Rangiora East	5903	Rangiora Ward	59	Waimakariri District	13	Canterbury Region	2.47721e+06	5.76633e+06	1	2445402	4	942	34	2
2444200	123	586306	Rangiora North	5903	Rangiora Ward	59	Waimakariri District	13	Canterbury Region	2.47692e+06	5.76739e+06	1	2444200	9	1081	55	3
85400	117	502102	Kamo East	204	Denby Ward	2	Whangarei District	01	Northland Region	2.62923e+06	6.61145e+06	1	85400	6	988	41	2
2707600	60	596400	Lyttelton	6007	Banks Peninsula Ward	60	Christchurch City	13	Canterbury Region	2.48761e+06	5.73399e+06	1	2707600	7	1007	21	2
2837800	54	601040	Oamaru South	6802	Oamaru Ward	68	Waitaki District	14	Otago Region	2.35004e+06	5.56471e+06	1	2837800	4	941	19	2
2837900	165	601040	Oamaru South	6802	Oamaru Ward	68	Waitaki District	14	Otago Region	2.34993e+06	5.56445e+06	1	2837900	6	992	58	2
2706900	66	596400	Lyttelton	6007	Banks Peninsula Ward	60	Christchurch City	13	Canterbury Region	2.48785e+06	5.7345e+06	1	2706900	5	957	23	2
869700	108	529800	Clarkin	1602	East Ward	16	Hamilton City	03	Waikato Region	2.71082e+06	6.37914e+06	1	869700	9	1093	49	3
869300	141	529600	Chartwell	1602	East Ward	16	Hamilton City	03	Waikato Region	2.71047e+06	6.37946e+06	1	869300	3	921	47	1
2443300	51	586306	Rangiora North	5903	Rangiora Ward	59	Waimakariri District	13	Canterbury Region	2.47657e+06	5.76703e+06	1	2443300	6	993	18	2
83100	63	502101	Kamo West	204	Denby Ward	2	Whangarei District	01	Northland Region	2.62855e+06	6.61183e+06	1	83100	7	1018	22	2
84000	120	502102	Kamo East	204	Denby Ward	2	Whangarei District	01	Northland Region	2.62892e+06	6.61282e+06	1	84000	9	1137	54	3
83400	66	502102	Kamo East	204	Denby Ward	2	Whangarei District	01	Northland Region	2.62858e+06	6.61288e+06	1	83400	9	1074	30	3
2835700	132	601040	Oamaru South	6802	Oamaru Ward	68	Waitaki District	14	Otago Region	2.34857e+06	5.56516e+06	1	2835700	4	946	46	2
2443700	198	586306	Rangiora North	5903	Rangiora Ward	59	Waimakariri District	13	Canterbury Region	2.4769e+06	5.76767e+06	1	2443700	9	1102	89	3
84500	252	502102	Kamo East	204	Denby Ward	2	Whangarei District	01	Northland Region	2.62913e+06	6.61241e+06	1	84500	7	1024	88	2
2446302	105	586302	Rangiora West	5903	Rangiora Ward	59	Waimakariri District	13	Canterbury Region	2.47722e+06	5.7655e+06	1	2446302	3	933	35	1
2446002	204	586302	Rangiora West	5903	Rangiora Ward	59	Waimakariri District	13	Canterbury Region	2.47675e+06	5.76556e+06	1	2446002	5	967	71	2
2446205	69	586303	Rangiora East	5903	Rangiora Ward	59	Waimakariri District	13	Canterbury Region	2.47739e+06	5.7655e+06	1	2446205	7	1017	24	2
87200	63	502202	Tikipunga East	204	Denby Ward	2	Whangarei District	01	Northland Region	2.63131e+06	6.61187e+06	1	87200	7	1029	22	2
2840100	111	601030	Oamaru Central	6802	Oamaru Ward	68	Waitaki District	14	Otago Region	2.349e+06	5.56553e+06	1	2840100	4	950	39	2
2839600	102	601030	Oamaru Central	6802	Oamaru Ward	68	Waitaki District	14	Otago Region	2.34882e+06	5.56552e+06	1	2839600	7	1027	36	2
2840200	87	601030	Oamaru Central	6802	Oamaru Ward	68	Waitaki District	14	Otago Region	2.34943e+06	5.56551e+06	1	2840200	4	953	30	2
2708300	24	596400	Lyttelton	6007	Banks Peninsula Ward	60	Christchurch City	13	Canterbury Region	2.48774e+06	5.73359e+06	1	2708300	4	943	8	2
88100	168	502202	Tikipunga East	204	Denby Ward	2	Whangarei District	01	Northland Region	2.6312e+06	6.61113e+06	1	88100	4	938	59	2
2839700	75	601030	Oamaru Central	6802	Oamaru Ward	68	Waitaki District	14	Otago Region	2.34899e+06	5.56534e+06	1	2839700	7	1027	26	2
87400	276	502202	Tikipunga East	204	Denby Ward	2	Whangarei District	01	Northland Region	2.6311e+06	6.61173e+06	1	87400	8	1036	124	3
2840700	39	601030	Oamaru Central	6802	Oamaru Ward	68	Waitaki District	14	Otago Region	2.35055e+06	5.56628e+06	1	2840700	9	1091	18	3
87800	111	502202	Tikipunga East	204	Denby Ward	2	Whangarei District	01	Northland Region	2.63115e+06	6.61146e+06	1	87800	6	992	39	2
480800	120	516101	Remuera West	704	Hobson Ward	7	Auckland City	02	Auckland Region	2.66918e+06	6.47965e+06	1	480800	4	951	42	2
87500	126	502202	Tikipunga East	204	Denby Ward	2	Whangarei District	01	Northland Region	2.6314e+06	6.61152e+06	1	87500	6	989	44	2
87100	78	502202	Tikipunga East	204	Denby Ward	2	Whangarei District	01	Northland Region	2.63112e+06	6.61199e+06	1	87100	7	1028	27	2
480601	192	516101	Remuera West	704	Hobson Ward	7	Auckland City	02	Auckland Region	2.66903e+06	6.47974e+06	1	480601	2	915	63	1
2709200	66	596400	Lyttelton	6007	Banks Peninsula Ward	60	Christchurch City	13	Canterbury Region	2.48743e+06	5.73406e+06	1	2709200	3	918	22	1
2446301	177	586302	Rangiora West	5903	Rangiora Ward	59	Waimakariri District	13	Canterbury Region	2.47714e+06	5.76581e+06	1	2446301	7	1024	62	2
2446004	165	586302	Rangiora West	5903	Rangiora Ward	59	Waimakariri District	13	Canterbury Region	2.47697e+06	5.76559e+06	1	2446004	6	989	58	2
2446005	153	586302	Rangiora West	5903	Rangiora Ward	59	Waimakariri District	13	Canterbury Region	2.47687e+06	5.76558e+06	1	2446005	5	973	54	2
85800	192	502101	Kamo West	204	Denby Ward	2	Whangarei District	01	Northland Region	2.62898e+06	6.61117e+06	1	85800	7	1027	67	2
85000	117	502102	Kamo East	204	Denby Ward	2	Whangarei District	01	Northland Region	2.62883e+06	6.61178e+06	1	85000	5	964	41	2
2838000	120	601040	Oamaru South	6802	Oamaru Ward	68	Waitaki District	14	Otago Region	2.35016e+06	5.56441e+06	1	2838000	3	933	40	1
2838200	78	601040	Oamaru South	6802	Oamaru Ward	68	Waitaki District	14	Otago Region	2.35037e+06	5.56403e+06	1	2838200	4	941	27	2
84800	51	502102	Kamo East	204	Denby Ward	2	Whangarei District	01	Northland Region	2.62878e+06	6.61227e+06	1	84800	8	1031	23	3
2707000	87	596400	Lyttelton	6007	Banks Peninsula Ward	60	Christchurch City	13	Canterbury Region	2.48805e+06	5.73434e+06	1	2707000	5	957	30	2
2838400	87	601030	Oamaru Central	6802	Oamaru Ward	68	Waitaki District	14	Otago Region	2.34953e+06	5.56531e+06	1	2838400	5	971	30	2
2838600	120	601030	Oamaru Central	6802	Oamaru Ward	68	Waitaki District	14	Otago Region	2.34977e+06	5.56531e+06	1	2838600	8	1033	54	3
2838500	117	601030	Oamaru Central	6802	Oamaru Ward	68	Waitaki District	14	Otago Region	2.34965e+06	5.56535e+06	1	2838500	6	980	41	2
2445500	36	586302	Rangiora West	5903	Rangiora Ward	59	Waimakariri District	13	Canterbury Region	2.47691e+06	5.76688e+06	1	2445500	4	942	13	2
2444600	63	586302	Rangiora West	5903	Rangiora Ward	59	Waimakariri District	13	Canterbury Region	2.47664e+06	5.76685e+06	1	2444600	8	1034	28	3
2445600	6	586303	Rangiora East	5903	Rangiora Ward	59	Waimakariri District	13	Canterbury Region	2.47711e+06	5.76687e+06	1	2445600	4	942	2	2
871900	63	529800	Clarkin	1602	East Ward	16	Hamilton City	03	Waikato Region	2.71072e+06	6.37942e+06	1	871900	9	1098	28	3
85300	123	502102	Kamo East	204	Denby Ward	2	Whangarei District	01	Northland Region	2.62911e+06	6.61146e+06	1	85300	3	926	41	1
2707300	54	596400	Lyttelton	6007	Banks Peninsula Ward	60	Christchurch City	13	Canterbury Region	2.48767e+06	5.73423e+06	1	2707300	5	957	19	2
2838800	54	601040	Oamaru South	6802	Oamaru Ward	68	Waitaki District	14	Otago Region	2.34912e+06	5.56512e+06	1	2838800	5	973	19	2
2445000	114	586302	Rangiora West	5903	Rangiora Ward	59	Waimakariri District	13	Canterbury Region	2.4768e+06	5.76653e+06	1	2445000	6	979	40	2
85100	96	502102	Kamo East	204	Denby Ward	2	Whangarei District	01	Northland Region	2.62883e+06	6.61155e+06	1	85100	7	1009	34	2
2707500	72	596400	Lyttelton	6007	Banks Peninsula Ward	60	Christchurch City	13	Canterbury Region	2.48764e+06	5.73411e+06	1	2707500	7	1007	25	2
2707800	78	596400	Lyttelton	6007	Banks Peninsula Ward	60	Christchurch City	13	Canterbury Region	2.48784e+06	5.73403e+06	1	2707800	5	962	27	2
2837700	54	601040	Oamaru South	6802	Oamaru Ward	68	Waitaki District	14	Otago Region	2.34991e+06	5.56473e+06	1	2837700	5	955	19	2
85700	114	502101	Kamo West	204	Denby Ward	2	Whangarei District	01	Northland Region	2.62881e+06	6.61129e+06	1	85700	4	947	40	2
2707900	54	596400	Lyttelton	6007	Banks Peninsula Ward	60	Christchurch City	13	Canterbury Region	2.48756e+06	5.73386e+06	1	2707900	5	970	19	2
2707700	27	596400	Lyttelton	6007	Banks Peninsula Ward	60	Christchurch City	13	Canterbury Region	2.48767e+06	5.73383e+06	1	2707700	5	962	9	2
2841800	9	601030	Oamaru Central	6802	Oamaru Ward	68	Waitaki District	14	Otago Region	2.3502e+06	5.56552e+06	1	2841800	8	1064	4	3
2841700	6	601030	Oamaru Central	6802	Oamaru Ward	68	Waitaki District	14	Otago Region	2.35005e+06	5.5655e+06	1	2841700	4	953	2	2
2710900	3	596400	Lyttelton	6007	Banks Peninsula Ward	60	Christchurch City	13	Canterbury Region	2.48759e+06	5.73366e+06	1	2710900	2	899	1	1
614100	72	519200	Mt St John	704	Hobson Ward	7	Auckland City	02	Auckland Region	2.66927e+06	6.47853e+06	1	614100	4	949	25	2
613800	24	519200	Mt St John	704	Hobson Ward	7	Auckland City	02	Auckland Region	2.66903e+06	6.47886e+06	1	613800	4	949	8	2
2448204	222	586305	Kingsbury	5903	Rangiora Ward	59	Waimakariri District	13	Canterbury Region	2.47638e+06	5.76836e+06	1	2448204	1	872	73	1
2841900	48	601030	Oamaru Central	6802	Oamaru Ward	68	Waitaki District	14	Otago Region	2.35e+06	5.56521e+06	1	2841900	8	1064	22	3
89600	96	502300	Whau Valley	204	Denby Ward	2	Whangarei District	01	Northland Region	2.62932e+06	6.61117e+06	1	89600	9	1083	43	3
614200	12	519200	Mt St John	704	Hobson Ward	7	Auckland City	02	Auckland Region	2.6694e+06	6.47838e+06	1	614200	4	949	4	2
89400	114	502300	Whau Valley	204	Denby Ward	2	Whangarei District	01	Northland Region	2.62932e+06	6.61055e+06	1	89400	1	885	38	1
2448213	123	586305	Kingsbury	5903	Rangiora Ward	59	Waimakariri District	13	Canterbury Region	2.47637e+06	5.76791e+06	1	2448213	1	895	41	1
2448216	120	586305	Kingsbury	5903	Rangiora Ward	59	Waimakariri District	13	Canterbury Region	2.47688e+06	5.76801e+06	1	2448216	3	929	40	1
88600	123	502202	Tikipunga East	204	Denby Ward	2	Whangarei District	01	Northland Region	2.63081e+06	6.61032e+06	1	88600	8	1033	55	3
613700	99	519200	Mt St John	704	Hobson Ward	7	Auckland City	02	Auckland Region	2.66894e+06	6.47892e+06	1	613700	10	1162	45	3
89202	33	502101	Kamo West	204	Denby Ward	2	Whangarei District	01	Northland Region	2.6291e+06	6.61103e+06	1	89202	2	916	11	1
481500	162	516101	Remuera West	704	Hobson Ward	7	Auckland City	02	Auckland Region	2.66929e+06	6.47949e+06	1	481500	5	957	57	2
89700	222	502300	Whau Valley	204	Denby Ward	2	Whangarei District	01	Northland Region	2.62949e+06	6.61076e+06	1	89700	7	1010	78	2
2841200	9	601030	Oamaru Central	6802	Oamaru Ward	68	Waitaki District	14	Otago Region	2.35017e+06	5.56591e+06	1	2841200	8	1064	4	3
2841100	6	601030	Oamaru Central	6802	Oamaru Ward	68	Waitaki District	14	Otago Region	2.35039e+06	5.56597e+06	1	2841100	8	1064	3	3
2841300	3	601030	Oamaru Central	6802	Oamaru Ward	68	Waitaki District	14	Otago Region	2.35034e+06	5.56585e+06	1	2841300	8	1064	1	3
89800	117	502300	Whau Valley	204	Denby Ward	2	Whangarei District	01	Northland Region	2.62965e+06	6.61056e+06	1	89800	9	1083	53	3
88400	138	502202	Tikipunga East	204	Denby Ward	2	Whangarei District	01	Northland Region	2.63112e+06	6.61095e+06	1	88400	7	1017	48	2
2708100	123	596400	Lyttelton	6007	Banks Peninsula Ward	60	Christchurch City	13	Canterbury Region	2.48781e+06	5.73361e+06	1	2708100	4	943	43	2
2708200	33	596400	Lyttelton	6007	Banks Peninsula Ward	60	Christchurch City	13	Canterbury Region	2.48784e+06	5.73364e+06	1	2708200	5	970	12	2
2708000	27	596400	Lyttelton	6007	Banks Peninsula Ward	60	Christchurch City	13	Canterbury Region	2.48751e+06	5.73375e+06	1	2708000	5	970	9	2
87600	126	502202	Tikipunga East	204	Denby Ward	2	Whangarei District	01	Northland Region	2.63089e+06	6.61145e+06	1	87600	8	1043	57	3
2840300	102	601030	Oamaru Central	6802	Oamaru Ward	68	Waitaki District	14	Otago Region	2.34921e+06	5.56541e+06	1	2840300	5	973	36	2
[truncated: 749 more rows]
