# Supplementary material for: Optimising locational access of deprived populations to farmers’ markets at a national scale: one route to improved fruit and vegetable consumption?
Source: PeerJ. 2013 Jul 2;1:e94. doi: 10.7717/peerj.94 (PMC3709110; doi:10.7717/peerj.94)
Supplement: Supplemental Information 3 [file peerj-01-94-s003.xlsx]

## Sheet: Pop_Existing_5kBuffer
MB2006	MBUR_POP20	CAU2006	CAU_DESCR	WARD_COD	WARD_DES	TA_CODE	TA_DESC	RC_COD	RC_DESC	POINT_X	POINT_Y	Cnt_MB2006	MB2006_1	NZDep2006	NZDep_scor	Weight	DepCat
2119200	45	572900	Thorndon-Tinakori Road	4703	Lambton Ward	47	Wellington City	09	Wellington Region	2.65901e+06	5.99091e+06	1	2119200	6	977	16	2
2119100	6	572900	Thorndon-Tinakori Road	4703	Lambton Ward	47	Wellington City	09	Wellington Region	2.6591e+06	5.99085e+06	1	2119100	6	977	2	2
1203203	105	536810	Mt Maunganui North	2301	Mount Maunganui-Papamoa Ward	23	Tauranga City	04	Bay of Plenty Region	2.79154e+06	6.38985e+06	1	1203203	8	1066	47	3
2752900	99	597600	Methven	6301	Methven-Hinds Ward	63	Ashburton District	13	Canterbury Region	2.40098e+06	5.72909e+06	1	2752900	4	936	35	2
2752700	33	597600	Methven	6301	Methven-Hinds Ward	63	Ashburton District	13	Canterbury Region	2.40078e+06	5.72947e+06	1	2752700	8	1040	15	3
2752801	69	597600	Methven	6301	Methven-Hinds Ward	63	Ashburton District	13	Canterbury Region	2.4005e+06	5.72921e+06	1	2752801	4	936	24	2
2752600	129	597600	Methven	6301	Methven-Hinds Ward	63	Ashburton District	13	Canterbury Region	2.4006e+06	5.72943e+06	1	2752600	6	993	45	2
1203205	87	536810	Mt Maunganui North	2301	Mount Maunganui-Papamoa Ward	23	Tauranga City	04	Bay of Plenty Region	2.79167e+06	6.38995e+06	1	1203205	9	1110	39	3
2230300	198	578901	Solway North	4802	Urban Ward	48	Masterton District	09	Wellington Region	2.73089e+06	6.02422e+06	1	2230300	9	1128	89	3
2623200	126	594600	Sydenham	6006	Spreydon-Heathcote Ward	60	Christchurch City	13	Canterbury Region	2.48152e+06	5.73918e+06	1	2623200	6	988	44	2
1706700	54	557200	St Johns Hill	3702	Urban Ward	37	Wanganui District	08	Manawatu-Wanganui Region	2.68422e+06	6.1409e+06	1	1706700	1	887	18	1
1705700	72	557200	St Johns Hill	3702	Urban Ward	37	Wanganui District	08	Manawatu-Wanganui Region	2.6841e+06	6.14078e+06	1	1705700	1	887	24	1
2230400	165	578901	Solway North	4802	Urban Ward	48	Masterton District	09	Wellington Region	2.73086e+06	6.02402e+06	1	2230400	7	1010	58	2
2231400	78	578901	Solway North	4802	Urban Ward	48	Masterton District	09	Wellington Region	2.73162e+06	6.02428e+06	1	2231400	5	955	27	2
1376604	336	544900	Riverdale	2807	Gisborne Ward	28	Gisborne District	05	Gisborne Region	2.94469e+06	6.27252e+06	1	1376604	1	898	111	1
2231001	48	578901	Solway North	4802	Urban Ward	48	Masterton District	09	Wellington Region	2.73138e+06	6.02485e+06	1	2231001	3	933	16	1
2231100	156	578901	Solway North	4802	Urban Ward	48	Masterton District	09	Wellington Region	2.73168e+06	6.02462e+06	1	2231100	3	918	51	1
2231002	21	578901	Solway North	4802	Urban Ward	48	Masterton District	09	Wellington Region	2.73148e+06	6.0246e+06	1	2231002	3	933	7	1
1485800	153	547700	St Leonards	3005	Hastings Ward	30	Hastings District	06	Hawke's Bay Region	2.83925e+06	6.16817e+06	1	1485800	10	1176	69	3
2623100	69	594600	Sydenham	6006	Spreydon-Heathcote Ward	60	Christchurch City	13	Canterbury Region	2.48163e+06	5.73929e+06	1	2623100	6	988	24	2
2626400	126	594400	St Martins	6006	Spreydon-Heathcote Ward	60	Christchurch City	13	Canterbury Region	2.48228e+06	5.73846e+06	1	2626400	3	930	42	1
2625100	174	594400	St Martins	6006	Spreydon-Heathcote Ward	60	Christchurch City	13	Canterbury Region	2.48181e+06	5.73876e+06	1	2625100	3	920	57	1
2231800	102	578901	Solway North	4802	Urban Ward	48	Masterton District	09	Wellington Region	2.7315e+06	6.02405e+06	1	2231800	3	933	34	1
2625500	93	594400	St Martins	6006	Spreydon-Heathcote Ward	60	Christchurch City	13	Canterbury Region	2.48214e+06	5.73845e+06	1	2625500	3	920	31	1
2624900	180	594400	St Martins	6006	Spreydon-Heathcote Ward	60	Christchurch City	13	Canterbury Region	2.48169e+06	5.739e+06	1	2624900	4	937	63	2
2626000	156	594400	St Martins	6006	Spreydon-Heathcote Ward	60	Christchurch City	13	Canterbury Region	2.48206e+06	5.73899e+06	1	2626000	3	932	51	1
2625300	102	594400	St Martins	6006	Spreydon-Heathcote Ward	60	Christchurch City	13	Canterbury Region	2.48204e+06	5.73865e+06	1	2625300	3	920	34	1
2625800	168	594400	St Martins	6006	Spreydon-Heathcote Ward	60	Christchurch City	13	Canterbury Region	2.48212e+06	5.73928e+06	1	2625800	5	966	59	2
2625200	99	594400	St Martins	6006	Spreydon-Heathcote Ward	60	Christchurch City	13	Canterbury Region	2.4819e+06	5.73859e+06	1	2625200	6	988	35	2
2626200	117	594400	St Martins	6006	Spreydon-Heathcote Ward	60	Christchurch City	13	Canterbury Region	2.48233e+06	5.73887e+06	1	2626200	2	909	39	1
2625700	120	594400	St Martins	6006	Spreydon-Heathcote Ward	60	Christchurch City	13	Canterbury Region	2.48191e+06	5.7392e+06	1	2625700	7	1009	42	2
2625900	210	594400	St Martins	6006	Spreydon-Heathcote Ward	60	Christchurch City	13	Canterbury Region	2.48228e+06	5.73915e+06	1	2625900	3	921	69	1
2626300	99	594400	St Martins	6006	Spreydon-Heathcote Ward	60	Christchurch City	13	Canterbury Region	2.48223e+06	5.73872e+06	1	2626300	8	1031	45	3
2626100	117	594400	St Martins	6006	Spreydon-Heathcote Ward	60	Christchurch City	13	Canterbury Region	2.48231e+06	5.73897e+06	1	2626100	4	947	41	2
2625000	93	594400	St Martins	6006	Spreydon-Heathcote Ward	60	Christchurch City	13	Canterbury Region	2.48183e+06	5.73896e+06	1	2625000	6	988	33	2
2234700	93	578901	Solway North	4802	Urban Ward	48	Masterton District	09	Wellington Region	2.73154e+06	6.02485e+06	1	2234700	3	928	31	1
1710300	162	557400	Upper Aramoho	3702	Urban Ward	37	Wanganui District	08	Manawatu-Wanganui Region	2.68688e+06	6.14339e+06	1	1710300	7	1021	57	2
1709900	111	557400	Upper Aramoho	3702	Urban Ward	37	Wanganui District	08	Manawatu-Wanganui Region	2.68673e+06	6.14309e+06	1	1709900	9	1096	50	3
1709700	114	557400	Upper Aramoho	3702	Urban Ward	37	Wanganui District	08	Manawatu-Wanganui Region	2.68683e+06	6.14322e+06	1	1709700	9	1078	51	3
402700	108	515410	Grey Lynn West	701	Western Bays Ward	7	Auckland City	02	Auckland Region	2.6654e+06	6.48145e+06	1	402700	4	940	38	2
402500	141	515410	Grey Lynn West	701	Western Bays Ward	7	Auckland City	02	Auckland Region	2.66492e+06	6.48122e+06	1	402500	4	940	49	2
403500	114	515410	Grey Lynn West	701	Western Bays Ward	7	Auckland City	02	Auckland Region	2.66502e+06	6.48116e+06	1	403500	5	956	40	2
1581000	84	551501	Lynmouth	3301	New Plymouth City Ward	33	New Plymouth District	07	Taranaki Region	2.6008e+06	6.23725e+06	1	1581000	5	969	29	2
1580900	72	551501	Lynmouth	3301	New Plymouth City Ward	33	New Plymouth District	07	Taranaki Region	2.6005e+06	6.23716e+06	1	1580900	5	969	25	2
438216	318	514101	Auckland Harbourside	704	Hobson Ward	7	Auckland City	02	Auckland Region	2.66871e+06	6.4821e+06	1	438216	7	1029	111	2
138201	87	506615	Cape Rodney	401	Northern Ward	4	Rodney District	02	Auckland Region	2.66328e+06	6.54005e+06	1	138201	5	960	30	2
438104	33	514103	Auckland Central East	704	Hobson Ward	7	Auckland City	02	Auckland Region	2.66812e+06	6.48248e+06	1	438104	8	1060	15	3
1581100	42	551501	Lynmouth	3301	New Plymouth City Ward	33	New Plymouth District	07	Taranaki Region	2.60087e+06	6.23736e+06	1	1581100	5	973	15	2
2759600	12	598312	Orari	6401	Geraldine Ward	64	Timaru District	13	Canterbury Region	2.36743e+06	5.67582e+06	1	2759600	3	932	4	1
438212	222	514101	Auckland Harbourside	704	Hobson Ward	7	Auckland City	02	Auckland Region	2.66835e+06	6.48252e+06	1	438212	7	1030	78	2
139700	51	506615	Cape Rodney	401	Northern Ward	4	Rodney District	02	Auckland Region	2.66295e+06	6.53652e+06	1	139700	3	923	17	1
1581200	48	551501	Lynmouth	3301	New Plymouth City Ward	33	New Plymouth District	07	Taranaki Region	2.60109e+06	6.23735e+06	1	1581200	5	973	17	2
138102	135	506615	Cape Rodney	401	Northern Ward	4	Rodney District	02	Auckland Region	2.66438e+06	6.53735e+06	1	138102	3	927	45	1
139200	72	506615	Cape Rodney	401	Northern Ward	4	Rodney District	02	Auckland Region	2.66176e+06	6.53586e+06	1	139200	2	906	24	1
1581300	93	551501	Lynmouth	3301	New Plymouth City Ward	33	New Plymouth District	07	Taranaki Region	2.60149e+06	6.2375e+06	1	1581300	6	988	33	2
138203	69	506615	Cape Rodney	401	Northern Ward	4	Rodney District	02	Auckland Region	2.66441e+06	6.53766e+06	1	138203	3	927	23	1
1581700	93	551501	Lynmouth	3301	New Plymouth City Ward	33	New Plymouth District	07	Taranaki Region	2.60117e+06	6.23724e+06	1	1581700	5	958	33	2
1582400	135	551501	Lynmouth	3301	New Plymouth City Ward	33	New Plymouth District	07	Taranaki Region	2.60086e+06	6.23709e+06	1	1582400	9	1133	61	3
402400	159	515410	Grey Lynn West	701	Western Bays Ward	7	Auckland City	02	Auckland Region	2.66486e+06	6.48129e+06	1	402400	1	893	52	1
2762800	168	598500	Geraldine	6401	Geraldine Ward	64	Timaru District	13	Canterbury Region	2.36963e+06	5.67856e+06	1	2762800	4	950	59	2
2762700	111	598500	Geraldine	6401	Geraldine Ward	64	Timaru District	13	Canterbury Region	2.36976e+06	5.67889e+06	1	2762700	7	1009	39	2
2448212	42	586305	Kingsbury	5903	Rangiora Ward	59	Waimakariri District	13	Canterbury Region	2.47623e+06	5.76793e+06	1	2448212	2	901	14	1
402600	123	515410	Grey Lynn West	701	Western Bays Ward	7	Auckland City	02	Auckland Region	2.66525e+06	6.48141e+06	1	402600	2	917	41	1
613200	144	520202	Ellerslie South	706	Tamaki-Maungakiekie Ward	7	Auckland City	02	Auckland Region	2.67094e+06	6.47704e+06	1	613200	3	929	48	1
403400	114	515410	Grey Lynn West	701	Western Bays Ward	7	Auckland City	02	Auckland Region	2.66499e+06	6.48122e+06	1	403400	3	927	38	1
2761800	30	598312	Orari	6401	Geraldine Ward	64	Timaru District	13	Canterbury Region	2.37037e+06	5.68133e+06	1	2761800	1	870	10	1
403600	195	515410	Grey Lynn West	701	Western Bays Ward	7	Auckland City	02	Auckland Region	2.66512e+06	6.48112e+06	1	403600	6	981	68	2
1582500	69	551501	Lynmouth	3301	New Plymouth City Ward	33	New Plymouth District	07	Taranaki Region	2.6003e+06	6.23707e+06	1	1582500	8	1072	31	3
403000	114	515431	Surrey Crescent	701	Western Bays Ward	7	Auckland City	02	Auckland Region	2.66464e+06	6.48095e+06	1	403000	2	911	38	1
403200	156	515431	Surrey Crescent	701	Western Bays Ward	7	Auckland City	02	Auckland Region	2.66461e+06	6.48074e+06	1	403200	2	914	51	1
1583202	42	551501	Lynmouth	3301	New Plymouth City Ward	33	New Plymouth District	07	Taranaki Region	2.60072e+06	6.237e+06	1	1583202	10	1196	19	3
1583100	132	551501	Lynmouth	3301	New Plymouth City Ward	33	New Plymouth District	07	Taranaki Region	2.60054e+06	6.23694e+06	1	1583100	5	964	46	2
403100	156	515431	Surrey Crescent	701	Western Bays Ward	7	Auckland City	02	Auckland Region	2.66474e+06	6.48091e+06	1	403100	3	928	51	1
405900	57	515431	Surrey Crescent	701	Western Bays Ward	7	Auckland City	02	Auckland Region	2.66494e+06	6.48042e+06	1	405900	8	1050	26	3
2765000	75	598500	Geraldine	6401	Geraldine Ward	64	Timaru District	13	Canterbury Region	2.36937e+06	5.6765e+06	1	2765000	4	947	26	2
406400	222	515431	Surrey Crescent	701	Western Bays Ward	7	Auckland City	02	Auckland Region	2.66496e+06	6.48024e+06	1	406400	9	1093	100	3
404000	150	515431	Surrey Crescent	701	Western Bays Ward	7	Auckland City	02	Auckland Region	2.66482e+06	6.48082e+06	1	404000	4	951	52	2
404800	24	515420	Grey Lynn East	701	Western Bays Ward	7	Auckland City	02	Auckland Region	2.66549e+06	6.48022e+06	1	404800	5	969	8	2
405100	99	515431	Surrey Crescent	701	Western Bays Ward	7	Auckland City	02	Auckland Region	2.66474e+06	6.48054e+06	1	405100	8	1040	45	3
1583400	123	551502	Spotswood	3301	New Plymouth City Ward	33	New Plymouth District	07	Taranaki Region	2.60008e+06	6.23705e+06	1	1583400	6	987	43	2
2763500	114	598500	Geraldine	6401	Geraldine Ward	64	Timaru District	13	Canterbury Region	2.36922e+06	5.67853e+06	1	2763500	3	929	38	1
2763000	111	598500	Geraldine	6401	Geraldine Ward	64	Timaru District	13	Canterbury Region	2.36957e+06	5.67878e+06	1	2763000	6	981	39	2
2763600	81	598500	Geraldine	6401	Geraldine Ward	64	Timaru District	13	Canterbury Region	2.36905e+06	5.67813e+06	1	2763600	7	1022	28	2
404600	108	515410	Grey Lynn West	701	Western Bays Ward	7	Auckland City	02	Auckland Region	2.66545e+06	6.4806e+06	1	404600	7	1022	38	2
2763800	36	598500	Geraldine	6401	Geraldine Ward	64	Timaru District	13	Canterbury Region	2.36925e+06	5.67807e+06	1	2763800	7	1022	13	2
2763700	33	598500	Geraldine	6401	Geraldine Ward	64	Timaru District	13	Canterbury Region	2.36892e+06	5.67798e+06	1	2763700	7	1022	12	2
2764000	42	598500	Geraldine	6401	Geraldine Ward	64	Timaru District	13	Canterbury Region	2.36946e+06	5.6779e+06	1	2764000	5	961	15	2
403800	84	515410	Grey Lynn West	701	Western Bays Ward	7	Auckland City	02	Auckland Region	2.66511e+06	6.48097e+06	1	403800	4	936	29	2
2764400	33	598500	Geraldine	6401	Geraldine Ward	64	Timaru District	13	Canterbury Region	2.3687e+06	5.67729e+06	1	2764400	8	1068	15	3
404500	90	515410	Grey Lynn West	701	Western Bays Ward	7	Auckland City	02	Auckland Region	2.66536e+06	6.48052e+06	1	404500	5	969	31	2
403700	81	515410	Grey Lynn West	701	Western Bays Ward	7	Auckland City	02	Auckland Region	2.66521e+06	6.48098e+06	1	403700	5	956	28	2
403900	123	515410	Grey Lynn West	701	Western Bays Ward	7	Auckland City	02	Auckland Region	2.66498e+06	6.48096e+06	1	403900	4	936	43	2
404200	114	515410	Grey Lynn West	701	Western Bays Ward	7	Auckland City	02	Auckland Region	2.66513e+06	6.4808e+06	1	404200	5	969	40	2
404100	63	515410	Grey Lynn West	701	Western Bays Ward	7	Auckland City	02	Auckland Region	2.66499e+06	6.48081e+06	1	404100	5	969	22	2
404400	90	515410	Grey Lynn West	701	Western Bays Ward	7	Auckland City	02	Auckland Region	2.66526e+06	6.48067e+06	1	404400	5	966	31	2
404700	45	515420	Grey Lynn East	701	Western Bays Ward	7	Auckland City	02	Auckland Region	2.66539e+06	6.48031e+06	1	404700	6	979	16	2
2894800	27	602800	Harbourside	7103	Cargill Ward	71	Dunedin City	14	Otago Region	2.31657e+06	5.47819e+06	1	2894800	9	1096	12	3
404300	87	515410	Grey Lynn West	701	Western Bays Ward	7	Auckland City	02	Auckland Region	2.66522e+06	6.48082e+06	1	404300	5	966	30	2
2764500	69	598500	Geraldine	6401	Geraldine Ward	64	Timaru District	13	Canterbury Region	2.3692e+06	5.67753e+06	1	2764500	7	1008	24	2
2764200	78	598500	Geraldine	6401	Geraldine Ward	64	Timaru District	13	Canterbury Region	2.36898e+06	5.67778e+06	1	2764200	8	1068	35	3
2764300	36	598500	Geraldine	6401	Geraldine Ward	64	Timaru District	13	Canterbury Region	2.36907e+06	5.67772e+06	1	2764300	8	1068	16	3
2764100	153	598500	Geraldine	6401	Geraldine Ward	64	Timaru District	13	Canterbury Region	2.36876e+06	5.67767e+06	1	2764100	3	934	50	1
2763900	45	598500	Geraldine	6401	Geraldine Ward	64	Timaru District	13	Canterbury Region	2.36927e+06	5.67795e+06	1	2763900	5	961	16	2
1203300	9	536821	Omanu	2301	Mount Maunganui-Papamoa Ward	23	Tauranga City	04	Bay of Plenty Region	2.79181e+06	6.3893e+06	1	1203300	9	1110	4	3
406100	129	515431	Surrey Crescent	701	Western Bays Ward	7	Auckland City	02	Auckland Region	2.66475e+06	6.48018e+06	1	406100	10	1540	58	3
406000	153	515431	Surrey Crescent	701	Western Bays Ward	7	Auckland City	02	Auckland Region	2.66485e+06	6.48029e+06	1	406000	10	1246	69	3
406700	66	515431	Surrey Crescent	701	Western Bays Ward	7	Auckland City	02	Auckland Region	2.66502e+06	6.48011e+06	1	406700	5	966	23	2
1586400	132	551400	Moturoa	3301	New Plymouth City Ward	33	New Plymouth District	07	Taranaki Region	2.60019e+06	6.23736e+06	1	1586400	7	1008	46	2
406300	9	515431	Surrey Crescent	701	Western Bays Ward	7	Auckland City	02	Auckland Region	2.66466e+06	6.48012e+06	1	406300	8	1040	4	3
406502	63	515431	Surrey Crescent	701	Western Bays Ward	7	Auckland City	02	Auckland Region	2.66516e+06	6.48017e+06	1	406502	5	966	22	2
2764900	201	598500	Geraldine	6401	Geraldine Ward	64	Timaru District	13	Canterbury Region	2.36912e+06	5.67688e+06	1	2764900	6	982	70	2
2764700	150	598500	Geraldine	6401	Geraldine Ward	64	Timaru District	13	Canterbury Region	2.36907e+06	5.67717e+06	1	2764700	5	963	52	2
406800	87	515420	Grey Lynn East	701	Western Bays Ward	7	Auckland City	02	Auckland Region	2.66563e+06	6.48052e+06	1	406800	6	985	30	2
1586500	63	551400	Moturoa	3301	New Plymouth City Ward	33	New Plymouth District	07	Taranaki Region	2.60034e+06	6.2374e+06	1	1586500	7	1003	22	2
2765100	69	598500	Geraldine	6401	Geraldine Ward	64	Timaru District	13	Canterbury Region	2.36952e+06	5.67614e+06	1	2765100	4	947	24	2
1586202	18	551400	Moturoa	3301	New Plymouth City Ward	33	New Plymouth District	07	Taranaki Region	2.60007e+06	6.23724e+06	1	1586202	7	1003	6	2
1586300	12	551400	Moturoa	3301	New Plymouth City Ward	33	New Plymouth District	07	Taranaki Region	2.60004e+06	6.23762e+06	1	1586300	7	1003	4	2
406201	36	515431	Surrey Crescent	701	Western Bays Ward	7	Auckland City	02	Auckland Region	2.66476e+06	6.48011e+06	1	406201	8	1040	16	3
2764600	39	598500	Geraldine	6401	Geraldine Ward	64	Timaru District	13	Canterbury Region	2.36891e+06	5.6775e+06	1	2764600	7	1008	14	2
2764800	123	598500	Geraldine	6401	Geraldine Ward	64	Timaru District	13	Canterbury Region	2.3695e+06	5.67679e+06	1	2764800	5	966	43	2
405300	156	515431	Surrey Crescent	701	Western Bays Ward	7	Auckland City	02	Auckland Region	2.66498e+06	6.4805e+06	1	405300	6	977	55	2
406600	162	515431	Surrey Crescent	701	Western Bays Ward	7	Auckland City	02	Auckland Region	2.66521e+06	6.48033e+06	1	406600	7	1015	57	2
1586201	39	551400	Moturoa	3301	New Plymouth City Ward	33	New Plymouth District	07	Taranaki Region	2.59999e+06	6.23741e+06	1	1586201	7	1003	14	2
405800	117	515431	Surrey Crescent	701	Western Bays Ward	7	Auckland City	02	Auckland Region	2.66515e+06	6.48045e+06	1	405800	8	1050	53	3
406501	78	515431	Surrey Crescent	701	Western Bays Ward	7	Auckland City	02	Auckland Region	2.66515e+06	6.48028e+06	1	406501	5	966	27	2
409900	51	515420	Grey Lynn East	701	Western Bays Ward	7	Auckland City	02	Auckland Region	2.66605e+06	6.48047e+06	1	409900	4	941	18	2
3030106	78	608600	Cromwell	6901	Cromwell Ward	69	Central Otago District	14	Otago Region	2.21073e+06	5.56649e+06	1	3030106	5	967	27	2
1587200	120	551400	Moturoa	3301	New Plymouth City Ward	33	New Plymouth District	07	Taranaki Region	2.60106e+06	6.23773e+06	1	1587200	5	966	42	2
1587600	36	551400	Moturoa	3301	New Plymouth City Ward	33	New Plymouth District	07	Taranaki Region	2.60134e+06	6.2378e+06	1	1587600	8	1049	16	3
1194600	87	536810	Mt Maunganui North	2301	Mount Maunganui-Papamoa Ward	23	Tauranga City	04	Bay of Plenty Region	2.79075e+06	6.3915e+06	1	1194600	5	968	30	2
1194800	72	536810	Mt Maunganui North	2301	Mount Maunganui-Papamoa Ward	23	Tauranga City	04	Bay of Plenty Region	2.79084e+06	6.39141e+06	1	1194800	5	968	25	2
408000	66	515410	Grey Lynn West	701	Western Bays Ward	7	Auckland City	02	Auckland Region	2.66537e+06	6.4807e+06	1	408000	6	985	23	2
1194200	24	536810	Mt Maunganui North	2301	Mount Maunganui-Papamoa Ward	23	Tauranga City	04	Bay of Plenty Region	2.79057e+06	6.39181e+06	1	1194200	4	948	8	2
3029500	78	608600	Cromwell	6901	Cromwell Ward	69	Central Otago District	14	Otago Region	2.21146e+06	5.56698e+06	1	3029500	5	962	27	2
1587501	81	551400	Moturoa	3301	New Plymouth City Ward	33	New Plymouth District	07	Taranaki Region	2.6014e+06	6.23768e+06	1	1587501	8	1049	36	3
1586900	162	551400	Moturoa	3301	New Plymouth City Ward	33	New Plymouth District	07	Taranaki Region	2.60054e+06	6.23761e+06	1	1586900	5	956	57	2
407800	105	515410	Grey Lynn West	701	Western Bays Ward	7	Auckland City	02	Auckland Region	2.66561e+06	6.48095e+06	1	407800	3	919	35	1
406900	90	515420	Grey Lynn East	701	Western Bays Ward	7	Auckland City	02	Auckland Region	2.66556e+06	6.48046e+06	1	406900	5	969	31	2
407700	90	515420	Grey Lynn East	701	Western Bays Ward	7	Auckland City	02	Auckland Region	2.66571e+06	6.481e+06	1	407700	2	917	30	1
408200	69	515420	Grey Lynn East	701	Western Bays Ward	7	Auckland City	02	Auckland Region	2.66578e+06	6.48084e+06	1	408200	4	952	24	2
407600	96	515410	Grey Lynn West	701	Western Bays Ward	7	Auckland City	02	Auckland Region	2.6654e+06	6.48124e+06	1	407600	4	952	34	2
1588200	156	551900	Kawaroa	3301	New Plymouth City Ward	33	New Plymouth District	07	Taranaki Region	2.60182e+06	6.238e+06	1	1588200	7	1027	55	2
1588100	165	551900	Kawaroa	3301	New Plymouth City Ward	33	New Plymouth District	07	Taranaki Region	2.6016e+06	6.23793e+06	1	1588100	6	986	58	2
407100	63	515420	Grey Lynn East	701	Western Bays Ward	7	Auckland City	02	Auckland Region	2.66556e+06	6.48028e+06	1	407100	6	979	22	2
1194500	165	536810	Mt Maunganui North	2301	Mount Maunganui-Papamoa Ward	23	Tauranga City	04	Bay of Plenty Region	2.79074e+06	6.39165e+06	1	1194500	4	948	58	2
407300	69	515420	Grey Lynn East	701	Western Bays Ward	7	Auckland City	02	Auckland Region	2.66574e+06	6.48038e+06	1	407300	5	969	24	2
3029700	114	608600	Cromwell	6901	Cromwell Ward	69	Central Otago District	14	Otago Region	2.21135e+06	5.56679e+06	1	3029700	6	997	40	2
408500	174	515410	Grey Lynn West	701	Western Bays Ward	7	Auckland City	02	Auckland Region	2.66549e+06	6.48122e+06	1	408500	4	944	61	2
1586700	102	551400	Moturoa	3301	New Plymouth City Ward	33	New Plymouth District	07	Taranaki Region	2.60068e+06	6.23745e+06	1	1586700	9	1112	46	3
1587400	30	551400	Moturoa	3301	New Plymouth City Ward	33	New Plymouth District	07	Taranaki Region	2.60133e+06	6.23754e+06	1	1587400	5	956	10	2
407500	72	515410	Grey Lynn West	701	Western Bays Ward	7	Auckland City	02	Auckland Region	2.66528e+06	6.48128e+06	1	407500	4	952	25	2
407900	159	515410	Grey Lynn West	701	Western Bays Ward	7	Auckland City	02	Auckland Region	2.66538e+06	6.48082e+06	1	407900	6	997	56	2
407000	75	515420	Grey Lynn East	701	Western Bays Ward	7	Auckland City	02	Auckland Region	2.66548e+06	6.48039e+06	1	407000	5	969	26	2
3030000	69	608600	Cromwell	6901	Cromwell Ward	69	Central Otago District	14	Otago Region	2.21124e+06	5.56656e+06	1	3030000	6	997	24	2
3029900	75	608600	Cromwell	6901	Cromwell Ward	69	Central Otago District	14	Otago Region	2.21145e+06	5.56647e+06	1	3029900	4	951	26	2
1586600	57	551400	Moturoa	3301	New Plymouth City Ward	33	New Plymouth District	07	Taranaki Region	2.60045e+06	6.23734e+06	1	1586600	9	1112	26	3
1194700	60	536810	Mt Maunganui North	2301	Mount Maunganui-Papamoa Ward	23	Tauranga City	04	Bay of Plenty Region	2.79098e+06	6.39154e+06	1	1194700	5	968	21	2
408400	39	515410	Grey Lynn West	701	Western Bays Ward	7	Auckland City	02	Auckland Region	2.66527e+06	6.48099e+06	1	408400	6	997	14	2
408100	153	515410	Grey Lynn West	701	Western Bays Ward	7	Auckland City	02	Auckland Region	2.66561e+06	6.48067e+06	1	408100	4	940	54	2
408600	84	515410	Grey Lynn West	701	Western Bays Ward	7	Auckland City	02	Auckland Region	2.66559e+06	6.48118e+06	1	408600	3	919	28	1
407200	48	515420	Grey Lynn East	701	Western Bays Ward	7	Auckland City	02	Auckland Region	2.66565e+06	6.48032e+06	1	407200	5	969	17	2
1194900	96	536810	Mt Maunganui North	2301	Mount Maunganui-Papamoa Ward	23	Tauranga City	04	Bay of Plenty Region	2.79093e+06	6.39133e+06	1	1194900	5	974	34	2
3029400	189	608600	Cromwell	6901	Cromwell Ward	69	Central Otago District	14	Otago Region	2.21116e+06	5.56689e+06	1	3029400	5	964	66	2
407400	99	515420	Grey Lynn East	701	Western Bays Ward	7	Auckland City	02	Auckland Region	2.66583e+06	6.48042e+06	1	407400	5	954	35	2
1195000	69	536810	Mt Maunganui North	2301	Mount Maunganui-Papamoa Ward	23	Tauranga City	04	Bay of Plenty Region	2.79093e+06	6.39115e+06	1	1195000	5	974	24	2
408300	78	515420	Grey Lynn East	701	Western Bays Ward	7	Auckland City	02	Auckland Region	2.66587e+06	6.48089e+06	1	408300	4	952	27	2
3029600	90	608600	Cromwell	6901	Cromwell Ward	69	Central Otago District	14	Otago Region	2.21167e+06	5.56698e+06	1	3029600	5	962	31	2
1586800	120	551400	Moturoa	3301	New Plymouth City Ward	33	New Plymouth District	07	Taranaki Region	2.60064e+06	6.23755e+06	1	1586800	7	1023	42	2
1587502	18	551501	Lynmouth	3301	New Plymouth City Ward	33	New Plymouth District	07	Taranaki Region	2.60151e+06	6.23758e+06	1	1587502	8	1049	8	3
1194400	96	536810	Mt Maunganui North	2301	Mount Maunganui-Papamoa Ward	23	Tauranga City	04	Bay of Plenty Region	2.7906e+06	6.3916e+06	1	1194400	8	1034	43	3
3029800	111	608600	Cromwell	6901	Cromwell Ward	69	Central Otago District	14	Otago Region	2.21159e+06	5.56666e+06	1	3029800	4	951	39	2
2901000	3	603100	Stuart St-Frederick St	7103	Cargill Ward	71	Dunedin City	14	Otago Region	2.31627e+06	5.47864e+06	1	2901000	9	1128	1	3
409400	81	515420	Grey Lynn East	701	Western Bays Ward	7	Auckland City	02	Auckland Region	2.6658e+06	6.48064e+06	1	409400	4	937	28	2
1588700	105	551900	Kawaroa	3301	New Plymouth City Ward	33	New Plymouth District	07	Taranaki Region	2.60168e+06	6.23773e+06	1	1588700	7	1012	37	2
1588300	75	551900	Kawaroa	3301	New Plymouth City Ward	33	New Plymouth District	07	Taranaki Region	2.60205e+06	6.23812e+06	1	1588300	8	1037	34	3
1195400	195	536810	Mt Maunganui North	2301	Mount Maunganui-Papamoa Ward	23	Tauranga City	04	Bay of Plenty Region	2.79136e+06	6.39128e+06	1	1195400	4	951	68	2
1196200	183	536810	Mt Maunganui North	2301	Mount Maunganui-Papamoa Ward	23	Tauranga City	04	Bay of Plenty Region	2.79161e+06	6.39047e+06	1	1196200	7	1012	64	2
1196400	159	536810	Mt Maunganui North	2301	Mount Maunganui-Papamoa Ward	23	Tauranga City	04	Bay of Plenty Region	2.79217e+06	6.39024e+06	1	1196400	5	954	56	2
3030500	18	608600	Cromwell	6901	Cromwell Ward	69	Central Otago District	14	Otago Region	2.21136e+06	5.56638e+06	1	3030500	6	981	6	2
1196500	258	536810	Mt Maunganui North	2301	Mount Maunganui-Papamoa Ward	23	Tauranga City	04	Bay of Plenty Region	2.79208e+06	6.39017e+06	1	1196500	3	928	85	1
1195200	69	536810	Mt Maunganui North	2301	Mount Maunganui-Papamoa Ward	23	Tauranga City	04	Bay of Plenty Region	2.79117e+06	6.39114e+06	1	1195200	5	960	24	2
1195100	39	536810	Mt Maunganui North	2301	Mount Maunganui-Papamoa Ward	23	Tauranga City	04	Bay of Plenty Region	2.79104e+06	6.39119e+06	1	1195100	5	960	14	2
410000	168	515420	Grey Lynn East	701	Western Bays Ward	7	Auckland City	02	Auckland Region	2.66609e+06	6.48059e+06	1	410000	5	971	59	2
2899700	48	603000	High St-Stuart St	7103	Cargill Ward	71	Dunedin City	14	Otago Region	2.3162e+06	5.47838e+06	1	2899700	7	1026	17	2
409700	96	515420	Grey Lynn East	701	Western Bays Ward	7	Auckland City	02	Auckland Region	2.66591e+06	6.48048e+06	1	409700	4	941	34	2
1497600	105	548000	Mayfair	3005	Hastings Ward	30	Hastings District	06	Hawke's Bay Region	2.84107e+06	6.16682e+06	1	1497600	6	996	37	2
408800	78	515420	Grey Lynn East	701	Western Bays Ward	7	Auckland City	02	Auckland Region	2.6658e+06	6.48118e+06	1	408800	2	906	26	1
1588400	108	551900	Kawaroa	3301	New Plymouth City Ward	33	New Plymouth District	07	Taranaki Region	2.60207e+06	6.23802e+06	1	1588400	8	1057	49	3
1196700	255	536810	Mt Maunganui North	2301	Mount Maunganui-Papamoa Ward	23	Tauranga City	04	Bay of Plenty Region	2.79199e+06	6.39001e+06	1	1196700	5	958	89	2
1195600	48	536810	Mt Maunganui North	2301	Mount Maunganui-Papamoa Ward	23	Tauranga City	04	Bay of Plenty Region	2.79111e+06	6.39098e+06	1	1195600	4	942	17	2
1195500	63	536810	Mt Maunganui North	2301	Mount Maunganui-Papamoa Ward	23	Tauranga City	04	Bay of Plenty Region	2.791e+06	6.39095e+06	1	1195500	4	942	22	2
2899800	42	603000	High St-Stuart St	7103	Cargill Ward	71	Dunedin City	14	Otago Region	2.31629e+06	5.47839e+06	1	2899800	7	1022	15	2
408900	87	515420	Grey Lynn East	701	Western Bays Ward	7	Auckland City	02	Auckland Region	2.6659e+06	6.48119e+06	1	408900	2	906	29	1
409500	96	515420	Grey Lynn East	701	Western Bays Ward	7	Auckland City	02	Auckland Region	2.66588e+06	6.4807e+06	1	409500	4	937	34	2
278006	57	512901	Parrs Park	602	Waitakere Ward	6	Waitakere City	02	Auckland Region	2.65514e+06	6.4764e+06	1	278006	9	1099	26	3
278300	282	512901	Parrs Park	602	Waitakere Ward	6	Waitakere City	02	Auckland Region	2.65528e+06	6.47555e+06	1	278300	5	954	99	2
3030103	102	608600	Cromwell	6901	Cromwell Ward	69	Central Otago District	14	Otago Region	2.21065e+06	5.56687e+06	1	3030103	3	920	34	1
1589700	180	551900	Kawaroa	3301	New Plymouth City Ward	33	New Plymouth District	07	Taranaki Region	2.60179e+06	6.23735e+06	1	1589700	1	896	59	1
1589300	78	551900	Kawaroa	3301	New Plymouth City Ward	33	New Plymouth District	07	Taranaki Region	2.60219e+06	6.23754e+06	1	1589300	8	1037	35	3
1588500	96	551900	Kawaroa	3301	New Plymouth City Ward	33	New Plymouth District	07	Taranaki Region	2.60212e+06	6.23794e+06	1	1588500	9	1123	43	3
1196000	93	536810	Mt Maunganui North	2301	Mount Maunganui-Papamoa Ward	23	Tauranga City	04	Bay of Plenty Region	2.79144e+06	6.39075e+06	1	1196000	6	977	33	2
1196300	192	536810	Mt Maunganui North	2301	Mount Maunganui-Papamoa Ward	23	Tauranga City	04	Bay of Plenty Region	2.7918e+06	6.39058e+06	1	1196300	4	938	67	2
278404	183	512901	Parrs Park	602	Waitakere Ward	6	Waitakere City	02	Auckland Region	2.65552e+06	6.47557e+06	1	278404	8	1033	82	3
409100	72	515420	Grey Lynn East	701	Western Bays Ward	7	Auckland City	02	Auckland Region	2.66611e+06	6.48122e+06	1	409100	2	917	24	1
3030201	249	608600	Cromwell	6901	Cromwell Ward	69	Central Otago District	14	Otago Region	2.21044e+06	5.56624e+06	1	3030201	6	981	87	2
1589600	81	551900	Kawaroa	3301	New Plymouth City Ward	33	New Plymouth District	07	Taranaki Region	2.60193e+06	6.23723e+06	1	1589600	8	1055	36	3
1589500	39	551900	Kawaroa	3301	New Plymouth City Ward	33	New Plymouth District	07	Taranaki Region	2.60203e+06	6.23737e+06	1	1589500	5	965	14	2
1588600	126	551900	Kawaroa	3301	New Plymouth City Ward	33	New Plymouth District	07	Taranaki Region	2.60188e+06	6.2378e+06	1	1588600	8	1068	57	3
1589000	63	551900	Kawaroa	3301	New Plymouth City Ward	33	New Plymouth District	07	Taranaki Region	2.60211e+06	6.23778e+06	1	1589000	7	1027	22	2
409300	87	515420	Grey Lynn East	701	Western Bays Ward	7	Auckland City	02	Auckland Region	2.66572e+06	6.48058e+06	1	409300	4	951	30	2
3030400	15	608600	Cromwell	6901	Cromwell Ward	69	Central Otago District	14	Otago Region	2.21119e+06	5.5664e+06	1	3030400	6	981	5	2
3030300	18	608600	Cromwell	6901	Cromwell Ward	69	Central Otago District	14	Otago Region	2.21105e+06	5.56641e+06	1	3030300	6	981	6	2
410200	42	515420	Grey Lynn East	701	Western Bays Ward	7	Auckland City	02	Auckland Region	2.66592e+06	6.48105e+06	1	410200	5	959	15	2
278007	192	512901	Parrs Park	602	Waitakere Ward	6	Waitakere City	02	Auckland Region	2.65498e+06	6.47634e+06	1	278007	9	1099	86	3
1195300	108	536810	Mt Maunganui North	2301	Mount Maunganui-Papamoa Ward	23	Tauranga City	04	Bay of Plenty Region	2.79127e+06	6.3912e+06	1	1195300	2	907	36	1
278901	186	512901	Parrs Park	602	Waitakere Ward	6	Waitakere City	02	Auckland Region	2.65513e+06	6.47581e+06	1	278901	5	958	65	2
410300	66	515420	Grey Lynn East	701	Western Bays Ward	7	Auckland City	02	Auckland Region	2.66595e+06	6.48094e+06	1	410300	3	934	22	1
278510	222	512901	Parrs Park	602	Waitakere Ward	6	Waitakere City	02	Auckland Region	2.65574e+06	6.47562e+06	1	278510	10	1280	100	3
409000	72	515420	Grey Lynn East	701	Western Bays Ward	7	Auckland City	02	Auckland Region	2.666e+06	6.4812e+06	1	409000	3	925	24	1
2121600	108	572900	Thorndon-Tinakori Road	4703	Lambton Ward	47	Wellington City	09	Wellington Region	2.6584e+06	5.99063e+06	1	2121600	5	956	38	2
1589100	36	551900	Kawaroa	3301	New Plymouth City Ward	33	New Plymouth District	07	Taranaki Region	2.60215e+06	6.23762e+06	1	1589100	9	1123	16	3
1589800	60	551900	Kawaroa	3301	New Plymouth City Ward	33	New Plymouth District	07	Taranaki Region	2.60242e+06	6.23763e+06	1	1589800	8	1037	27	3
1588900	72	551900	Kawaroa	3301	New Plymouth City Ward	33	New Plymouth District	07	Taranaki Region	2.60195e+06	6.23766e+06	1	1588900	8	1055	32	3
1196600	192	536810	Mt Maunganui North	2301	Mount Maunganui-Papamoa Ward	23	Tauranga City	04	Bay of Plenty Region	2.79181e+06	6.39023e+06	1	1196600	3	934	63	1
1195800	84	536810	Mt Maunganui North	2301	Mount Maunganui-Papamoa Ward	23	Tauranga City	04	Bay of Plenty Region	2.79159e+06	6.39095e+06	1	1195800	5	963	29	2
410100	87	515420	Grey Lynn East	701	Western Bays Ward	7	Auckland City	02	Auckland Region	2.66581e+06	6.48103e+06	1	410100	5	959	30	2
278005	207	512901	Parrs Park	602	Waitakere Ward	6	Waitakere City	02	Auckland Region	2.65501e+06	6.47651e+06	1	278005	9	1134	93	3
1589200	132	551900	Kawaroa	3301	New Plymouth City Ward	33	New Plymouth District	07	Taranaki Region	2.602e+06	6.23754e+06	1	1589200	7	1009	46	2
1589900	57	551900	Kawaroa	3301	New Plymouth City Ward	33	New Plymouth District	07	Taranaki Region	2.60245e+06	6.23754e+06	1	1589900	7	1008	20	2
1196100	108	536810	Mt Maunganui North	2301	Mount Maunganui-Papamoa Ward	23	Tauranga City	04	Bay of Plenty Region	2.79133e+06	6.39071e+06	1	1196100	5	963	38	2
408700	198	515420	Grey Lynn East	701	Western Bays Ward	7	Auckland City	02	Auckland Region	2.6657e+06	6.48117e+06	1	408700	3	925	65	1
278103	309	512901	Parrs Park	602	Waitakere Ward	6	Waitakere City	02	Auckland Region	2.65533e+06	6.47628e+06	1	278103	9	1095	139	3
409200	21	515420	Grey Lynn East	701	Western Bays Ward	7	Auckland City	02	Auckland Region	2.66623e+06	6.48119e+06	1	409200	3	925	7	1
3030104	123	608600	Cromwell	6901	Cromwell Ward	69	Central Otago District	14	Otago Region	2.21068e+06	5.56674e+06	1	3030104	7	1004	43	2
3030105	102	608600	Cromwell	6901	Cromwell Ward	69	Central Otago District	14	Otago Region	2.21068e+06	5.56662e+06	1	3030105	5	967	36	2
1589400	123	551900	Kawaroa	3301	New Plymouth City Ward	33	New Plymouth District	07	Taranaki Region	2.60225e+06	6.23743e+06	1	1589400	5	965	43	2
409600	84	515420	Grey Lynn East	701	Western Bays Ward	7	Auckland City	02	Auckland Region	2.66596e+06	6.48076e+06	1	409600	5	971	29	2
409800	66	515420	Grey Lynn East	701	Western Bays Ward	7	Auckland City	02	Auckland Region	2.66597e+06	6.48058e+06	1	409800	4	951	23	2
1203207	42	536810	Mt Maunganui North	2301	Mount Maunganui-Papamoa Ward	23	Tauranga City	04	Bay of Plenty Region	2.79176e+06	6.38982e+06	1	1203207	9	1110	19	3
281300	186	513013	McLaren Park	602	Waitakere Ward	6	Waitakere City	02	Auckland Region	2.65442e+06	6.47672e+06	1	281300	8	1061	84	3
3032900	18	609301	Queenstown Bay	7001	Queenstown-Wakatipu Ward	70	Queenstown-Lakes District	14	Otago Region	2.16818e+06	5.56636e+06	1	3032900	7	1000	6	2
410700	120	515420	Grey Lynn East	701	Western Bays Ward	7	Auckland City	02	Auckland Region	2.66618e+06	6.48065e+06	1	410700	1	895	40	1
1590400	111	552002	Marsland Hill	3301	New Plymouth City Ward	33	New Plymouth District	07	Taranaki Region	2.60298e+06	6.23759e+06	1	1590400	5	970	39	2
1591400	39	551800	New Plymouth Central	3301	New Plymouth City Ward	33	New Plymouth District	07	Taranaki Region	2.60238e+06	6.23771e+06	1	1591400	8	1041	18	3
1592100	6	551800	New Plymouth Central	3301	New Plymouth City Ward	33	New Plymouth District	07	Taranaki Region	2.60289e+06	6.2378e+06	1	1592100	6	999	2	2
1198000	75	536821	Omanu	2301	Mount Maunganui-Papamoa Ward	23	Tauranga City	04	Bay of Plenty Region	2.79284e+06	6.38927e+06	1	1198000	7	1011	26	2
1198300	99	536821	Omanu	2301	Mount Maunganui-Papamoa Ward	23	Tauranga City	04	Bay of Plenty Region	2.793e+06	6.38933e+06	1	1198300	7	1011	35	2
1197500	135	536821	Omanu	2301	Mount Maunganui-Papamoa Ward	23	Tauranga City	04	Bay of Plenty Region	2.7925e+06	6.38941e+06	1	1197500	3	922	45	1
1197400	117	536821	Omanu	2301	Mount Maunganui-Papamoa Ward	23	Tauranga City	04	Bay of Plenty Region	2.79238e+06	6.38937e+06	1	1197400	8	1036	53	3
410900	54	515420	Grey Lynn East	701	Western Bays Ward	7	Auckland City	02	Auckland Region	2.66615e+06	6.48108e+06	1	410900	3	929	18	1
2901600	45	603100	Stuart St-Frederick St	7103	Cargill Ward	71	Dunedin City	14	Otago Region	2.31652e+06	5.47859e+06	1	2901600	9	1128	20	3
410500	114	515420	Grey Lynn East	701	Western Bays Ward	7	Auckland City	02	Auckland Region	2.66604e+06	6.48082e+06	1	410500	5	958	40	2
410600	108	515420	Grey Lynn East	701	Western Bays Ward	7	Auckland City	02	Auckland Region	2.66612e+06	6.48088e+06	1	410600	3	934	36	1
3033400	9	609301	Queenstown Bay	7001	Queenstown-Wakatipu Ward	70	Queenstown-Lakes District	14	Otago Region	2.16817e+06	5.5662e+06	1	3033400	7	1019	3	2
1590500	90	551800	New Plymouth Central	3301	New Plymouth City Ward	33	New Plymouth District	07	Taranaki Region	2.60229e+06	6.23814e+06	1	1590500	6	991	31	2
1197800	129	536821	Omanu	2301	Mount Maunganui-Papamoa Ward	23	Tauranga City	04	Bay of Plenty Region	2.79262e+06	6.38913e+06	1	1197800	8	1046	58	3
410800	132	515420	Grey Lynn East	701	Western Bays Ward	7	Auckland City	02	Auckland Region	2.66624e+06	6.48073e+06	1	410800	2	914	44	1
411500	45	515420	Grey Lynn East	701	Western Bays Ward	7	Auckland City	02	Auckland Region	2.66648e+06	6.48091e+06	1	411500	3	922	15	1
1590800	75	551800	New Plymouth Central	3301	New Plymouth City Ward	33	New Plymouth District	07	Taranaki Region	2.60251e+06	6.23808e+06	1	1590800	9	1077	34	3
411200	114	515420	Grey Lynn East	701	Western Bays Ward	7	Auckland City	02	Auckland Region	2.6662e+06	6.48094e+06	1	411200	2	915	38	1
3033201	87	609301	Queenstown Bay	7001	Queenstown-Wakatipu Ward	70	Queenstown-Lakes District	14	Otago Region	2.16826e+06	5.56683e+06	1	3033201	6	985	30	2
1591100	6	551800	New Plymouth Central	3301	New Plymouth City Ward	33	New Plymouth District	07	Taranaki Region	2.60245e+06	6.23791e+06	1	1591100	8	1041	3	3
1196800	135	536810	Mt Maunganui North	2301	Mount Maunganui-Papamoa Ward	23	Tauranga City	04	Bay of Plenty Region	2.79191e+06	6.38983e+06	1	1196800	6	976	47	2
1197200	219	536821	Omanu	2301	Mount Maunganui-Papamoa Ward	23	Tauranga City	04	Bay of Plenty Region	2.79235e+06	6.38972e+06	1	1197200	4	943	77	2
2901800	138	603100	Stuart St-Frederick St	7103	Cargill Ward	71	Dunedin City	14	Otago Region	2.31668e+06	5.47877e+06	1	2901800	10	1159	62	3
3033301	126	609301	Queenstown Bay	7001	Queenstown-Wakatipu Ward	70	Queenstown-Lakes District	14	Otago Region	2.16831e+06	5.56644e+06	1	3033301	3	927	42	1
3033302	87	609301	Queenstown Bay	7001	Queenstown-Wakatipu Ward	70	Queenstown-Lakes District	14	Otago Region	2.1684e+06	5.56655e+06	1	3033302	3	927	29	1
1590900	63	551800	New Plymouth Central	3301	New Plymouth City Ward	33	New Plymouth District	07	Taranaki Region	2.60224e+06	6.23783e+06	1	1590900	8	1041	28	3
1591500	3	551800	New Plymouth Central	3301	New Plymouth City Ward	33	New Plymouth District	07	Taranaki Region	2.60266e+06	6.23783e+06	1	1591500	6	999	1	2
411600	12	515420	Grey Lynn East	701	Western Bays Ward	7	Auckland City	02	Auckland Region	2.66657e+06	6.48096e+06	1	411600	3	922	4	1
1197000	174	536821	Omanu	2301	Mount Maunganui-Papamoa Ward	23	Tauranga City	04	Bay of Plenty Region	2.79212e+06	6.38959e+06	1	1197000	4	940	61	2
1197700	252	536821	Omanu	2301	Mount Maunganui-Papamoa Ward	23	Tauranga City	04	Bay of Plenty Region	2.79278e+06	6.38951e+06	1	1197700	5	960	88	2
1197600	111	536821	Omanu	2301	Mount Maunganui-Papamoa Ward	23	Tauranga City	04	Bay of Plenty Region	2.79262e+06	6.38946e+06	1	1197600	3	932	37	1
3033000	42	609301	Queenstown Bay	7001	Queenstown-Wakatipu Ward	70	Queenstown-Lakes District	14	Otago Region	2.16801e+06	5.56625e+06	1	3033000	7	1000	15	2
280905	357	513012	Palm Heights	602	Waitakere Ward	6	Waitakere City	02	Auckland Region	2.6541e+06	6.47716e+06	1	280905	10	1147	161	3
411000	15	515420	Grey Lynn East	701	Western Bays Ward	7	Auckland City	02	Auckland Region	2.66641e+06	6.48111e+06	1	411000	2	915	5	1
3033100	153	609301	Queenstown Bay	7001	Queenstown-Wakatipu Ward	70	Queenstown-Lakes District	14	Otago Region	2.16792e+06	5.56613e+06	1	3033100	7	1000	54	2
1590300	87	552002	Marsland Hill	3301	New Plymouth City Ward	33	New Plymouth District	07	Taranaki Region	2.60272e+06	6.23764e+06	1	1590300	8	1035	39	3
1591700	18	551800	New Plymouth Central	3301	New Plymouth City Ward	33	New Plymouth District	07	Taranaki Region	2.6027e+06	6.23807e+06	1	1591700	6	999	6	2
1198500	192	536821	Omanu	2301	Mount Maunganui-Papamoa Ward	23	Tauranga City	04	Bay of Plenty Region	2.7929e+06	6.38889e+06	1	1198500	5	964	67	2
1198400	141	536821	Omanu	2301	Mount Maunganui-Papamoa Ward	23	Tauranga City	04	Bay of Plenty Region	2.79281e+06	6.38878e+06	1	1198400	9	1112	63	3
410400	78	515420	Grey Lynn East	701	Western Bays Ward	7	Auckland City	02	Auckland Region	2.66602e+06	6.48103e+06	1	410400	3	929	26	1
1590200	78	552002	Marsland Hill	3301	New Plymouth City Ward	33	New Plymouth District	07	Taranaki Region	2.60276e+06	6.23754e+06	1	1590200	7	1006	27	2
1591200	3	551800	New Plymouth Central	3301	New Plymouth City Ward	33	New Plymouth District	07	Taranaki Region	2.60256e+06	6.23799e+06	1	1591200	8	1041	1	3
1590700	48	551800	New Plymouth Central	3301	New Plymouth City Ward	33	New Plymouth District	07	Taranaki Region	2.60234e+06	6.23802e+06	1	1590700	6	999	17	2
1196900	144	536810	Mt Maunganui North	2301	Mount Maunganui-Papamoa Ward	23	Tauranga City	04	Bay of Plenty Region	2.79203e+06	6.38986e+06	1	1196900	6	992	50	2
1197300	213	536821	Omanu	2301	Mount Maunganui-Papamoa Ward	23	Tauranga City	04	Bay of Plenty Region	2.79253e+06	6.3898e+06	1	1197300	4	947	75	2
411100	36	515420	Grey Lynn East	701	Western Bays Ward	7	Auckland City	02	Auckland Region	2.66628e+06	6.481e+06	1	411100	2	915	12	1
1590000	66	551900	Kawaroa	3301	New Plymouth City Ward	33	New Plymouth District	07	Taranaki Region	2.60248e+06	6.23738e+06	1	1590000	7	1008	23	2
411300	75	515420	Grey Lynn East	701	Western Bays Ward	7	Auckland City	02	Auckland Region	2.66632e+06	6.48078e+06	1	411300	3	922	25	1
411400	12	515420	Grey Lynn East	701	Western Bays Ward	7	Auckland City	02	Auckland Region	2.6664e+06	6.48085e+06	1	411400	3	922	4	1
1591000	33	551800	New Plymouth Central	3301	New Plymouth City Ward	33	New Plymouth District	07	Taranaki Region	2.60235e+06	6.23788e+06	1	1591000	8	1041	15	3
1197100	162	536821	Omanu	2301	Mount Maunganui-Papamoa Ward	23	Tauranga City	04	Bay of Plenty Region	2.79224e+06	6.38963e+06	1	1197100	3	923	53	1
1594100	6	551800	New Plymouth Central	3301	New Plymouth City Ward	33	New Plymouth District	07	Taranaki Region	2.60395e+06	6.2383e+06	1	1594100	7	1013	2	2
281403	111	513013	McLaren Park	602	Waitakere Ward	6	Waitakere City	02	Auckland Region	2.65448e+06	6.47695e+06	1	281403	8	1063	50	3
2903200	21	603100	Stuart St-Frederick St	7103	Cargill Ward	71	Dunedin City	14	Otago Region	2.31615e+06	5.47859e+06	1	2903200	8	1032	9	3
281509	279	513013	McLaren Park	602	Waitakere Ward	6	Waitakere City	02	Auckland Region	2.65484e+06	6.47674e+06	1	281509	9	1113	126	3
3033900	105	609302	Queenstown Hill	7001	Queenstown-Wakatipu Ward	70	Queenstown-Lakes District	14	Otago Region	2.16848e+06	5.56613e+06	1	3033900	7	1019	37	2
1198900	189	536821	Omanu	2301	Mount Maunganui-Papamoa Ward	23	Tauranga City	04	Bay of Plenty Region	2.79357e+06	6.38885e+06	1	1198900	4	941	66	2
413400	78	514000	Freemans Bay	701	Western Bays Ward	7	Auckland City	02	Auckland Region	2.66687e+06	6.48136e+06	1	413400	4	951	27	2
281506	279	513013	McLaren Park	602	Waitakere Ward	6	Waitakere City	02	Auckland Region	2.6548e+06	6.47651e+06	1	281506	9	1083	126	3
1592400	36	551800	New Plymouth Central	3301	New Plymouth City Ward	33	New Plymouth District	07	Taranaki Region	2.60296e+06	6.23804e+06	1	1592400	6	999	13	2
413600	63	514000	Freemans Bay	701	Western Bays Ward	7	Auckland City	02	Auckland Region	2.66661e+06	6.48155e+06	1	413600	7	1011	22	2
3034201	15	609302	Queenstown Hill	7001	Queenstown-Wakatipu Ward	70	Queenstown-Lakes District	14	Otago Region	2.16856e+06	5.56595e+06	1	3034201	4	948	5	2
1591900	15	551800	New Plymouth Central	3301	New Plymouth City Ward	33	New Plymouth District	07	Taranaki Region	2.60281e+06	6.23797e+06	1	1591900	6	999	5	2
1593000	60	551800	New Plymouth Central	3301	New Plymouth City Ward	33	New Plymouth District	07	Taranaki Region	2.60353e+06	6.23848e+06	1	1593000	6	981	21	2
1199100	132	536821	Omanu	2301	Mount Maunganui-Papamoa Ward	23	Tauranga City	04	Bay of Plenty Region	2.79347e+06	6.38851e+06	1	1199100	6	979	46	2
1199000	183	536821	Omanu	2301	Mount Maunganui-Papamoa Ward	23	Tauranga City	04	Bay of Plenty Region	2.7936e+06	6.38862e+06	1	1199000	4	952	64	2
413500	30	514000	Freemans Bay	701	Western Bays Ward	7	Auckland City	02	Auckland Region	2.66661e+06	6.48116e+06	1	413500	2	914	10	1
281200	84	513020	Opanuku	602	Waitakere Ward	6	Waitakere City	02	Auckland Region	2.65442e+06	6.4764e+06	1	281200	5	968	29	2
3034300	51	609302	Queenstown Hill	7001	Queenstown-Wakatipu Ward	70	Queenstown-Lakes District	14	Otago Region	2.16844e+06	5.56574e+06	1	3034300	3	922	17	1
3034401	51	609302	Queenstown Hill	7001	Queenstown-Wakatipu Ward	70	Queenstown-Lakes District	14	Otago Region	2.16855e+06	5.56577e+06	1	3034401	3	922	17	1
1593300	3	551800	New Plymouth Central	3301	New Plymouth City Ward	33	New Plymouth District	07	Taranaki Region	2.60367e+06	6.23842e+06	1	1593300	6	981	1	2
413100	69	514000	Freemans Bay	701	Western Bays Ward	7	Auckland City	02	Auckland Region	2.66688e+06	6.48165e+06	1	413100	9	1122	31	3
413300	222	514000	Freemans Bay	701	Western Bays Ward	7	Auckland City	02	Auckland Region	2.66688e+06	6.4815e+06	1	413300	9	1122	100	3
281502	216	513013	McLaren Park	602	Waitakere Ward	6	Waitakere City	02	Auckland Region	2.65461e+06	6.47688e+06	1	281502	9	1099	97	3
281402	153	513013	McLaren Park	602	Waitakere Ward	6	Waitakere City	02	Auckland Region	2.65432e+06	6.47703e+06	1	281402	6	975	54	2
413000	363	514000	Freemans Bay	701	Western Bays Ward	7	Auckland City	02	Auckland Region	2.66673e+06	6.48163e+06	1	413000	8	1043	163	3
3033800	12	609302	Queenstown Hill	7001	Queenstown-Wakatipu Ward	70	Queenstown-Lakes District	14	Otago Region	2.16834e+06	5.56612e+06	1	3033800	7	1019	4	2
2122300	27	572900	Thorndon-Tinakori Road	4703	Lambton Ward	47	Wellington City	09	Wellington Region	2.65844e+06	5.99068e+06	1	2122300	4	947	9	2
1592500	3	551800	New Plymouth Central	3301	New Plymouth City Ward	33	New Plymouth District	07	Taranaki Region	2.60309e+06	6.23808e+06	1	1592500	6	999	1	2
3034202	72	609302	Queenstown Hill	7001	Queenstown-Wakatipu Ward	70	Queenstown-Lakes District	14	Otago Region	2.16862e+06	5.566e+06	1	3034202	4	948	25	2
3033600	42	609301	Queenstown Bay	7001	Queenstown-Wakatipu Ward	70	Queenstown-Lakes District	14	Otago Region	2.16801e+06	5.56605e+06	1	3033600	7	1019	15	2
3033700	123	609302	Queenstown Hill	7001	Queenstown-Wakatipu Ward	70	Queenstown-Lakes District	14	Otago Region	2.16826e+06	5.56603e+06	1	3033700	7	1019	43	2
1592700	3	551800	New Plymouth Central	3301	New Plymouth City Ward	33	New Plymouth District	07	Taranaki Region	2.60313e+06	6.23801e+06	1	1592700	6	999	1	2
1198601	150	536821	Omanu	2301	Mount Maunganui-Papamoa Ward	23	Tauranga City	04	Bay of Plenty Region	2.79315e+06	6.38844e+06	1	1198601	6	985	52	2
1592000	3	551800	New Plymouth Central	3301	New Plymouth City Ward	33	New Plymouth District	07	Taranaki Region	2.60285e+06	6.2379e+06	1	1592000	6	999	1	2
1592900	3	551800	New Plymouth Central	3301	New Plymouth City Ward	33	New Plymouth District	07	Taranaki Region	2.6032e+06	6.23791e+06	1	1592900	6	999	1	2
1592800	3	551800	New Plymouth Central	3301	New Plymouth City Ward	33	New Plymouth District	07	Taranaki Region	2.60306e+06	6.23786e+06	1	1592800	6	999	1	2
281510	162	513013	McLaren Park	602	Waitakere Ward	6	Waitakere City	02	Auckland Region	2.65463e+06	6.47668e+06	1	281510	9	1107	73	3
1198602	195	536821	Omanu	2301	Mount Maunganui-Papamoa Ward	23	Tauranga City	04	Bay of Plenty Region	2.79337e+06	6.38835e+06	1	1198602	3	919	64	1
1199201	195	536821	Omanu	2301	Mount Maunganui-Papamoa Ward	23	Tauranga City	04	Bay of Plenty Region	2.79379e+06	6.38835e+06	1	1199201	5	965	68	2
416100	69	514000	Freemans Bay	701	Western Bays Ward	7	Auckland City	02	Auckland Region	2.66629e+06	6.48207e+06	1	416100	7	1000	24	2
415600	147	514000	Freemans Bay	701	Western Bays Ward	7	Auckland City	02	Auckland Region	2.66605e+06	6.48199e+06	1	415600	5	966	51	2
1595200	105	552002	Marsland Hill	3301	New Plymouth City Ward	33	New Plymouth District	07	Taranaki Region	2.60348e+06	6.23771e+06	1	1595200	6	988	37	2
2119700	27	572900	Thorndon-Tinakori Road	4703	Lambton Ward	47	Wellington City	09	Wellington Region	2.65878e+06	5.99074e+06	1	2119700	5	967	9	2
1596500	123	552001	Mount Bryan	3301	New Plymouth City Ward	33	New Plymouth District	07	Taranaki Region	2.60433e+06	6.23828e+06	1	1596500	7	1013	43	2
417000	156	514000	Freemans Bay	701	Western Bays Ward	7	Auckland City	02	Auckland Region	2.6665e+06	6.48191e+06	1	417000	2	901	51	1
1202800	6	536810	Mt Maunganui North	2301	Mount Maunganui-Papamoa Ward	23	Tauranga City	04	Bay of Plenty Region	2.79125e+06	6.39052e+06	1	1202800	10	1181	3	3
1202901	15	536810	Mt Maunganui North	2301	Mount Maunganui-Papamoa Ward	23	Tauranga City	04	Bay of Plenty Region	2.79138e+06	6.39039e+06	1	1202901	10	1181	7	3
1594000	24	551800	New Plymouth Central	3301	New Plymouth City Ward	33	New Plymouth District	07	Taranaki Region	2.60361e+06	6.23818e+06	1	1594000	7	1013	8	2
2118800	6	572900	Thorndon-Tinakori Road	4703	Lambton Ward	47	Wellington City	09	Wellington Region	2.65909e+06	5.99101e+06	1	2118800	3	931	2	1
2119000	33	572900	Thorndon-Tinakori Road	4703	Lambton Ward	47	Wellington City	09	Wellington Region	2.65909e+06	5.99096e+06	1	2119000	3	931	11	1
414700	69	514000	Freemans Bay	701	Western Bays Ward	7	Auckland City	02	Auckland Region	2.66626e+06	6.48184e+06	1	414700	2	904	23	1
1200800	153	536831	Arataki	2301	Mount Maunganui-Papamoa Ward	23	Tauranga City	04	Bay of Plenty Region	2.79387e+06	6.38735e+06	1	1200800	10	1323	69	3
1200300	162	536821	Omanu	2301	Mount Maunganui-Papamoa Ward	23	Tauranga City	04	Bay of Plenty Region	2.7937e+06	6.3878e+06	1	1200300	3	924	53	1
414900	60	514000	Freemans Bay	701	Western Bays Ward	7	Auckland City	02	Auckland Region	2.66613e+06	6.48166e+06	1	414900	2	904	20	1
413700	135	514000	Freemans Bay	701	Western Bays Ward	7	Auckland City	02	Auckland Region	2.6665e+06	6.48139e+06	1	413700	2	916	45	1
414500	30	514000	Freemans Bay	701	Western Bays Ward	7	Auckland City	02	Auckland Region	2.66627e+06	6.48127e+06	1	414500	3	924	10	1
415000	60	514000	Freemans Bay	701	Western Bays Ward	7	Auckland City	02	Auckland Region	2.66616e+06	6.48158e+06	1	415000	1	895	20	1
1593900	6	551800	New Plymouth Central	3301	New Plymouth City Ward	33	New Plymouth District	07	Taranaki Region	2.60332e+06	6.23808e+06	1	1593900	7	1013	2	2
2118300	201	572900	Thorndon-Tinakori Road	4703	Lambton Ward	47	Wellington City	09	Wellington Region	2.6593e+06	5.99086e+06	1	2118300	4	940	70	2
413800	45	514000	Freemans Bay	701	Western Bays Ward	7	Auckland City	02	Auckland Region	2.66665e+06	6.48107e+06	1	413800	7	1011	16	2
1594600	39	551800	New Plymouth Central	3301	New Plymouth City Ward	33	New Plymouth District	07	Taranaki Region	2.60363e+06	6.23798e+06	1	1594600	6	981	14	2
1593500	9	551800	New Plymouth Central	3301	New Plymouth City Ward	33	New Plymouth District	07	Taranaki Region	2.60394e+06	6.23853e+06	1	1593500	6	981	3	2
3036400	39	608800	Wanaka	7002	Wanaka Ward	70	Queenstown-Lakes District	14	Otago Region	2.20352e+06	5.60482e+06	1	3036400	4	947	14	2
3036300	144	608800	Wanaka	7002	Wanaka Ward	70	Queenstown-Lakes District	14	Otago Region	2.20394e+06	5.60493e+06	1	3036300	4	947	50	2
3036100	93	608800	Wanaka	7002	Wanaka Ward	70	Queenstown-Lakes District	14	Otago Region	2.20403e+06	5.60523e+06	1	3036100	6	988	33	2
1200401	207	536831	Arataki	2301	Mount Maunganui-Papamoa Ward	23	Tauranga City	04	Bay of Plenty Region	2.79411e+06	6.3875e+06	1	1200401	6	976	72	2
1200600	141	536821	Omanu	2301	Mount Maunganui-Papamoa Ward	23	Tauranga City	04	Bay of Plenty Region	2.79355e+06	6.38763e+06	1	1200600	9	1109	63	3
1200700	156	536821	Omanu	2301	Mount Maunganui-Papamoa Ward	23	Tauranga City	04	Bay of Plenty Region	2.79374e+06	6.38759e+06	1	1200700	7	1028	55	2
414200	141	514000	Freemans Bay	701	Western Bays Ward	7	Auckland City	02	Auckland Region	2.66644e+06	6.48152e+06	1	414200	5	954	49	2
221904	54	513430	Hobsonville	601	Massey Ward	6	Waitakere City	02	Auckland Region	2.65903e+06	6.48902e+06	1	221904	3	927	18	1
414300	63	514000	Freemans Bay	701	Western Bays Ward	7	Auckland City	02	Auckland Region	2.66639e+06	6.48138e+06	1	414300	5	954	22	2
1725900	138	556200	Gonville South	3702	Urban Ward	37	Wanganui District	08	Manawatu-Wanganui Region	2.68375e+06	6.1379e+06	1	1725900	8	1052	62	3
1200200	171	536821	Omanu	2301	Mount Maunganui-Papamoa Ward	23	Tauranga City	04	Bay of Plenty Region	2.79337e+06	6.38787e+06	1	1200200	10	1158	77	3
2122500	147	572900	Thorndon-Tinakori Road	4703	Lambton Ward	47	Wellington City	09	Wellington Region	2.65901e+06	5.99064e+06	1	2122500	6	985	51	2
1594900	63	552002	Marsland Hill	3301	New Plymouth City Ward	33	New Plymouth District	07	Taranaki Region	2.60402e+06	6.23812e+06	1	1594900	9	1077	28	3
414800	90	514000	Freemans Bay	701	Western Bays Ward	7	Auckland City	02	Auckland Region	2.66629e+06	6.48176e+06	1	414800	2	914	30	1
414400	60	514000	Freemans Bay	701	Western Bays Ward	7	Auckland City	02	Auckland Region	2.66633e+06	6.48131e+06	1	414400	3	924	20	1
415100	192	514000	Freemans Bay	701	Western Bays Ward	7	Auckland City	02	Auckland Region	2.66634e+06	6.48169e+06	1	415100	8	1032	86	3
414100	129	514000	Freemans Bay	701	Western Bays Ward	7	Auckland City	02	Auckland Region	2.66633e+06	6.48158e+06	1	414100	3	931	43	1
1594800	33	552002	Marsland Hill	3301	New Plymouth City Ward	33	New Plymouth District	07	Taranaki Region	2.60379e+06	6.23804e+06	1	1594800	9	1077	15	3
3035800	66	608800	Wanaka	7002	Wanaka Ward	70	Queenstown-Lakes District	14	Otago Region	2.20396e+06	5.60561e+06	1	3035800	4	941	23	2
3036000	33	608800	Wanaka	7002	Wanaka Ward	70	Queenstown-Lakes District	14	Otago Region	2.20381e+06	5.6053e+06	1	3036000	6	988	12	2
415300	27	514000	Freemans Bay	701	Western Bays Ward	7	Auckland City	02	Auckland Region	2.66656e+06	6.48176e+06	1	415300	2	914	9	1
415200	21	514000	Freemans Bay	701	Western Bays Ward	7	Auckland City	02	Auckland Region	2.66649e+06	6.4817e+06	1	415200	2	900	7	1
414000	114	514000	Freemans Bay	701	Western Bays Ward	7	Auckland City	02	Auckland Region	2.66618e+06	6.48145e+06	1	414000	3	924	38	1
1594500	15	551800	New Plymouth Central	3301	New Plymouth City Ward	33	New Plymouth District	07	Taranaki Region	2.60342e+06	6.2379e+06	1	1594500	6	981	5	2
3036500	135	608800	Wanaka	7002	Wanaka Ward	70	Queenstown-Lakes District	14	Otago Region	2.20367e+06	5.60459e+06	1	3036500	4	936	47	2
3036604	48	608800	Wanaka	7002	Wanaka Ward	70	Queenstown-Lakes District	14	Otago Region	2.20331e+06	5.60466e+06	1	3036604	4	936	17	2
2121300	3	572900	Thorndon-Tinakori Road	4703	Lambton Ward	47	Wellington City	09	Wellington Region	2.65888e+06	5.99074e+06	1	2121300	7	1009	1	2
1598000	9	552100	Fitzroy	3301	New Plymouth City Ward	33	New Plymouth District	07	Taranaki Region	2.60482e+06	6.23829e+06	1	1598000	4	944	3	2
416600	108	514000	Freemans Bay	701	Western Bays Ward	7	Auckland City	02	Auckland Region	2.66652e+06	6.48214e+06	1	416600	2	903	36	1
415900	12	514000	Freemans Bay	701	Western Bays Ward	7	Auckland City	02	Auckland Region	2.66627e+06	6.48217e+06	1	415900	3	920	4	1
416200	36	514000	Freemans Bay	701	Western Bays Ward	7	Auckland City	02	Auckland Region	2.66618e+06	6.4821e+06	1	416200	8	1060	16	3
415800	60	514000	Freemans Bay	701	Western Bays Ward	7	Auckland City	02	Auckland Region	2.66617e+06	6.4822e+06	1	415800	3	920	20	1
1595500	141	552002	Marsland Hill	3301	New Plymouth City Ward	33	New Plymouth District	07	Taranaki Region	2.6038e+06	6.23762e+06	1	1595500	1	886	47	1
1596600	96	552001	Mount Bryan	3301	New Plymouth City Ward	33	New Plymouth District	07	Taranaki Region	2.60437e+06	6.23813e+06	1	1596600	5	967	34	2
1595300	81	552002	Marsland Hill	3301	New Plymouth City Ward	33	New Plymouth District	07	Taranaki Region	2.60323e+06	6.23764e+06	1	1595300	8	1042	36	3
2119400	33	572900	Thorndon-Tinakori Road	4703	Lambton Ward	47	Wellington City	09	Wellington Region	2.65883e+06	5.99098e+06	1	2119400	6	977	12	2
1202902	63	536810	Mt Maunganui North	2301	Mount Maunganui-Papamoa Ward	23	Tauranga City	04	Bay of Plenty Region	2.79154e+06	6.39034e+06	1	1202902	10	1181	28	3
415400	57	514000	Freemans Bay	701	Western Bays Ward	7	Auckland City	02	Auckland Region	2.66602e+06	6.48225e+06	1	415400	2	900	19	1
1726300	81	556200	Gonville South	3702	Urban Ward	37	Wanganui District	08	Manawatu-Wanganui Region	2.68411e+06	6.13838e+06	1	1726300	6	994	28	2
1595000	162	552002	Marsland Hill	3301	New Plymouth City Ward	33	New Plymouth District	07	Taranaki Region	2.60403e+06	6.23798e+06	1	1595000	8	1048	73	3
1596000	150	552001	Mount Bryan	3301	New Plymouth City Ward	33	New Plymouth District	07	Taranaki Region	2.60412e+06	6.23866e+06	1	1596000	5	957	52	2
1595800	150	552001	Mount Bryan	3301	New Plymouth City Ward	33	New Plymouth District	07	Taranaki Region	2.60382e+06	6.23868e+06	1	1595800	7	1007	52	2
416900	102	514000	Freemans Bay	701	Western Bays Ward	7	Auckland City	02	Auckland Region	2.66643e+06	6.482e+06	1	416900	4	942	36	2
1726500	54	556200	Gonville South	3702	Urban Ward	37	Wanganui District	08	Manawatu-Wanganui Region	2.68421e+06	6.13812e+06	1	1726500	7	1010	19	2
1727400	36	557000	Spriggens Park	3702	Urban Ward	37	Wanganui District	08	Manawatu-Wanganui Region	2.68456e+06	6.13825e+06	1	1727400	9	1131	16	3
416300	93	514000	Freemans Bay	701	Western Bays Ward	7	Auckland City	02	Auckland Region	2.66619e+06	6.482e+06	1	416300	8	1060	42	3
3038211	177	609301	Queenstown Bay	7001	Queenstown-Wakatipu Ward	70	Queenstown-Lakes District	14	Otago Region	2.16812e+06	5.56681e+06	1	3038211	6	980	62	2
1595100	108	552002	Marsland Hill	3301	New Plymouth City Ward	33	New Plymouth District	07	Taranaki Region	2.60375e+06	6.23791e+06	1	1595100	7	1021	38	2
2120000	78	572900	Thorndon-Tinakori Road	4703	Lambton Ward	47	Wellington City	09	Wellington Region	2.65863e+06	5.99076e+06	1	2120000	5	967	27	2
1596300	123	552001	Mount Bryan	3301	New Plymouth City Ward	33	New Plymouth District	07	Taranaki Region	2.60449e+06	6.23846e+06	1	1596300	5	962	43	2
1596100	39	552001	Mount Bryan	3301	New Plymouth City Ward	33	New Plymouth District	07	Taranaki Region	2.60419e+06	6.23851e+06	1	1596100	5	967	14	2
416700	66	514000	Freemans Bay	701	Western Bays Ward	7	Auckland City	02	Auckland Region	2.66664e+06	6.4821e+06	1	416700	2	900	22	1
3038226	3	609301	Queenstown Bay	7001	Queenstown-Wakatipu Ward	70	Queenstown-Lakes District	14	Otago Region	2.16784e+06	5.56647e+06	1	3038226	7	1010	1	2
1595400	117	552002	Marsland Hill	3301	New Plymouth City Ward	33	New Plymouth District	07	Taranaki Region	2.6038e+06	6.23779e+06	1	1595400	4	938	41	2
2120100	45	572900	Thorndon-Tinakori Road	4703	Lambton Ward	47	Wellington City	09	Wellington Region	2.65846e+06	5.99074e+06	1	2120100	5	967	16	2
2119900	15	572900	Thorndon-Tinakori Road	4703	Lambton Ward	47	Wellington City	09	Wellington Region	2.65868e+06	5.99072e+06	1	2119900	5	967	5	2
1596400	69	552001	Mount Bryan	3301	New Plymouth City Ward	33	New Plymouth District	07	Taranaki Region	2.60425e+06	6.23842e+06	1	1596400	7	1009	24	2
1202700	6	536810	Mt Maunganui North	2301	Mount Maunganui-Papamoa Ward	23	Tauranga City	04	Bay of Plenty Region	2.79122e+06	6.39063e+06	1	1202700	10	1181	3	3
1726700	48	556200	Gonville South	3702	Urban Ward	37	Wanganui District	08	Manawatu-Wanganui Region	2.68444e+06	6.13811e+06	1	1726700	6	994	17	2
1726200	69	556200	Gonville South	3702	Urban Ward	37	Wanganui District	08	Manawatu-Wanganui Region	2.68413e+06	6.13789e+06	1	1726200	9	1101	31	3
416000	165	514000	Freemans Bay	701	Western Bays Ward	7	Auckland City	02	Auckland Region	2.66637e+06	6.48216e+06	1	416000	7	1000	58	2
1727300	3	557000	Spriggens Park	3702	Urban Ward	37	Wanganui District	08	Manawatu-Wanganui Region	2.68499e+06	6.13854e+06	1	1727300	9	1075	1	3
1726900	123	557000	Spriggens Park	3702	Urban Ward	37	Wanganui District	08	Manawatu-Wanganui Region	2.68435e+06	6.13852e+06	1	1726900	9	1074	55	3
1726100	75	556200	Gonville South	3702	Urban Ward	37	Wanganui District	08	Manawatu-Wanganui Region	2.68383e+06	6.13766e+06	1	1726100	7	1022	26	2
1727100	30	557000	Spriggens Park	3702	Urban Ward	37	Wanganui District	08	Manawatu-Wanganui Region	2.68459e+06	6.13844e+06	1	1727100	9	1131	14	3
1727000	87	557000	Spriggens Park	3702	Urban Ward	37	Wanganui District	08	Manawatu-Wanganui Region	2.68468e+06	6.13882e+06	1	1727000	8	1071	39	3
416500	48	514000	Freemans Bay	701	Western Bays Ward	7	Auckland City	02	Auckland Region	2.6664e+06	6.48204e+06	1	416500	2	916	16	1
964900	63	527503	Cambridge Central	1702	Cambridge Ward	17	Waipa District	03	Waikato Region	2.7272e+06	6.36466e+06	1	964900	6	985	22	2
1595600	132	552002	Marsland Hill	3301	New Plymouth City Ward	33	New Plymouth District	07	Taranaki Region	2.60348e+06	6.23757e+06	1	1595600	4	945	46	2
2119600	36	572900	Thorndon-Tinakori Road	4703	Lambton Ward	47	Wellington City	09	Wellington Region	2.65889e+06	5.99096e+06	1	2119600	6	977	13	2
416800	48	514000	Freemans Bay	701	Western Bays Ward	7	Auckland City	02	Auckland Region	2.66669e+06	6.48198e+06	1	416800	2	900	16	1
1203000	141	536810	Mt Maunganui North	2301	Mount Maunganui-Papamoa Ward	23	Tauranga City	04	Bay of Plenty Region	2.7915e+06	6.39012e+06	1	1203000	7	1024	49	2
415500	78	514000	Freemans Bay	701	Western Bays Ward	7	Auckland City	02	Auckland Region	2.66601e+06	6.48216e+06	1	415500	3	920	26	1
417100	51	514000	Freemans Bay	701	Western Bays Ward	7	Auckland City	02	Auckland Region	2.66661e+06	6.48188e+06	1	417100	6	975	18	2
1596200	12	552001	Mount Bryan	3301	New Plymouth City Ward	33	New Plymouth District	07	Taranaki Region	2.60446e+06	6.23857e+06	1	1596200	5	967	4	2
1595900	66	552001	Mount Bryan	3301	New Plymouth City Ward	33	New Plymouth District	07	Taranaki Region	2.60385e+06	6.2386e+06	1	1595900	5	958	23	2
1595700	57	552001	Mount Bryan	3301	New Plymouth City Ward	33	New Plymouth District	07	Taranaki Region	2.60355e+06	6.23858e+06	1	1595700	7	1007	20	2
1203204	108	536810	Mt Maunganui North	2301	Mount Maunganui-Papamoa Ward	23	Tauranga City	04	Bay of Plenty Region	2.79161e+06	6.3899e+06	1	1203204	8	1050	49	3
1726600	138	556200	Gonville South	3702	Urban Ward	37	Wanganui District	08	Manawatu-Wanganui Region	2.68432e+06	6.13807e+06	1	1726600	8	1030	62	3
1726400	126	556200	Gonville South	3702	Urban Ward	37	Wanganui District	08	Manawatu-Wanganui Region	2.68386e+06	6.13802e+06	1	1726400	7	1010	44	2
416400	78	514000	Freemans Bay	701	Western Bays Ward	7	Auckland City	02	Auckland Region	2.66625e+06	6.48195e+06	1	416400	2	916	26	1
3038225	54	609301	Queenstown Bay	7001	Queenstown-Wakatipu Ward	70	Queenstown-Lakes District	14	Otago Region	2.16799e+06	5.56672e+06	1	3038225	7	1010	19	2
419300	30	515500	Arch Hill	701	Western Bays Ward	7	Auckland City	02	Auckland Region	2.66598e+06	6.48009e+06	1	419300	3	918	10	1
1598102	45	552100	Fitzroy	3301	New Plymouth City Ward	33	New Plymouth District	07	Taranaki Region	2.6051e+06	6.23826e+06	1	1598102	5	961	16	2
1597000	75	552100	Fitzroy	3301	New Plymouth City Ward	33	New Plymouth District	07	Taranaki Region	2.60475e+06	6.23881e+06	1	1597000	3	931	25	1
1204401	12	536821	Omanu	2301	Mount Maunganui-Papamoa Ward	23	Tauranga City	04	Bay of Plenty Region	2.79308e+06	6.38768e+06	1	1204401	8	1035	5	3
1203600	24	536821	Omanu	2301	Mount Maunganui-Papamoa Ward	23	Tauranga City	04	Bay of Plenty Region	2.79213e+06	6.38895e+06	1	1203600	7	1024	8	2
417300	33	514000	Freemans Bay	701	Western Bays Ward	7	Auckland City	02	Auckland Region	2.66674e+06	6.48177e+06	1	417300	6	975	12	2
1597300	132	552100	Fitzroy	3301	New Plymouth City Ward	33	New Plymouth District	07	Taranaki Region	2.60516e+06	6.2387e+06	1	1597300	7	1026	46	2
1597100	45	552100	Fitzroy	3301	New Plymouth City Ward	33	New Plymouth District	07	Taranaki Region	2.60458e+06	6.23869e+06	1	1597100	3	931	15	1
2121200	144	572900	Thorndon-Tinakori Road	4703	Lambton Ward	47	Wellington City	09	Wellington Region	2.65902e+06	5.99082e+06	1	2121200	7	1009	50	2
1597500	36	552100	Fitzroy	3301	New Plymouth City Ward	33	New Plymouth District	07	Taranaki Region	2.60513e+06	6.23855e+06	1	1597500	4	941	13	2
1597700	66	552100	Fitzroy	3301	New Plymouth City Ward	33	New Plymouth District	07	Taranaki Region	2.6047e+06	6.2385e+06	1	1597700	5	958	23	2
1203900	3	536821	Omanu	2301	Mount Maunganui-Papamoa Ward	23	Tauranga City	04	Bay of Plenty Region	2.79189e+06	6.38809e+06	1	1203900	8	1035	1	3
1204000	12	536821	Omanu	2301	Mount Maunganui-Papamoa Ward	23	Tauranga City	04	Bay of Plenty Region	2.79253e+06	6.38825e+06	1	1204000	8	1035	5	3
1598101	126	552100	Fitzroy	3301	New Plymouth City Ward	33	New Plymouth District	07	Taranaki Region	2.605e+06	6.23836e+06	1	1598101	5	961	44	2
1597900	36	552100	Fitzroy	3301	New Plymouth City Ward	33	New Plymouth District	07	Taranaki Region	2.60514e+06	6.2384e+06	1	1597900	4	944	13	2
2122400	63	572900	Thorndon-Tinakori Road	4703	Lambton Ward	47	Wellington City	09	Wellington Region	2.65862e+06	5.99066e+06	1	2122400	4	947	22	2
1597200	135	552100	Fitzroy	3301	New Plymouth City Ward	33	New Plymouth District	07	Taranaki Region	2.60505e+06	6.23888e+06	1	1597200	5	970	47	2
1204300	54	536821	Omanu	2301	Mount Maunganui-Papamoa Ward	23	Tauranga City	04	Bay of Plenty Region	2.79218e+06	6.38771e+06	1	1204300	8	1035	24	3
2121700	81	572900	Thorndon-Tinakori Road	4703	Lambton Ward	47	Wellington City	09	Wellington Region	2.65832e+06	5.99056e+06	1	2121700	4	943	28	2
2121100	30	572900	Thorndon-Tinakori Road	4703	Lambton Ward	47	Wellington City	09	Wellington Region	2.65885e+06	5.99086e+06	1	2121100	7	1009	10	2
1597800	57	552100	Fitzroy	3301	New Plymouth City Ward	33	New Plymouth District	07	Taranaki Region	2.60479e+06	6.23853e+06	1	1597800	5	958	20	2
1597400	123	552100	Fitzroy	3301	New Plymouth City Ward	33	New Plymouth District	07	Taranaki Region	2.60496e+06	6.23864e+06	1	1597400	4	941	43	2
1597600	30	552100	Fitzroy	3301	New Plymouth City Ward	33	New Plymouth District	07	Taranaki Region	2.60525e+06	6.23858e+06	1	1597600	4	941	10	2
1466709	15	548833	Te Mata Hills	3009	Poukawa Ward	30	Hastings District	06	Hawke's Bay Region	2.84515e+06	6.16275e+06	1	1466709	1	884	5	1
418200	72	515500	Arch Hill	701	Western Bays Ward	7	Auckland City	02	Auckland Region	2.66605e+06	6.48026e+06	1	418200	3	922	24	1
2121800	48	572900	Thorndon-Tinakori Road	4703	Lambton Ward	47	Wellington City	09	Wellington Region	2.6583e+06	5.9905e+06	1	2121800	4	943	17	2
1204100	6	536821	Omanu	2301	Mount Maunganui-Papamoa Ward	23	Tauranga City	04	Bay of Plenty Region	2.79293e+06	6.3881e+06	1	1204100	8	1035	3	3
2780800	117	599000	Maori Park	6404	Timaru Ward	64	Timaru District	13	Canterbury Region	2.36992e+06	5.64492e+06	1	2780800	5	973	41	2
2780900	69	599000	Maori Park	6404	Timaru Ward	64	Timaru District	13	Canterbury Region	2.37013e+06	5.64489e+06	1	2780900	8	1056	31	3
1469100	33	545761	Irongate	3003	Heretaunga Ward	30	Hastings District	06	Hawke's Bay Region	2.83833e+06	6.16527e+06	1	1469100	4	943	12	2
1469301	3	545761	Irongate	3005	Hastings Ward	30	Hastings District	06	Hawke's Bay Region	2.83854e+06	6.16575e+06	1	1469301	3	921	1	1
1601200	114	552200	Welbourn	3301	New Plymouth City Ward	33	New Plymouth District	07	Taranaki Region	2.60425e+06	6.23666e+06	1	1601200	8	1044	51	3
1600700	69	552200	Welbourn	3301	New Plymouth City Ward	33	New Plymouth District	07	Taranaki Region	2.60415e+06	6.23749e+06	1	1600700	9	1089	31	3
2123200	78	572900	Thorndon-Tinakori Road	4703	Lambton Ward	47	Wellington City	09	Wellington Region	2.65826e+06	5.99064e+06	1	2123200	5	967	27	2
2122900	99	572900	Thorndon-Tinakori Road	4703	Lambton Ward	47	Wellington City	09	Wellington Region	2.65852e+06	5.99095e+06	1	2122900	4	941	35	2
1599400	78	552100	Fitzroy	3301	New Plymouth City Ward	33	New Plymouth District	07	Taranaki Region	2.60558e+06	6.23902e+06	1	1599400	7	1023	27	2
1599500	51	552100	Fitzroy	3301	New Plymouth City Ward	33	New Plymouth District	07	Taranaki Region	2.60537e+06	6.23896e+06	1	1599500	5	955	18	2
419000	78	515500	Arch Hill	701	Western Bays Ward	7	Auckland City	02	Auckland Region	2.66586e+06	6.48019e+06	1	419000	3	918	26	1
1599700	15	552100	Fitzroy	3301	New Plymouth City Ward	33	New Plymouth District	07	Taranaki Region	2.60561e+06	6.23877e+06	1	1599700	5	955	5	2
419200	78	515500	Arch Hill	701	Western Bays Ward	7	Auckland City	02	Auckland Region	2.66594e+06	6.48021e+06	1	419200	5	954	27	2
1598501	87	552100	Fitzroy	3301	New Plymouth City Ward	33	New Plymouth District	07	Taranaki Region	2.60543e+06	6.23836e+06	1	1598501	4	944	30	2
2123700	66	573000	Lambton	4703	Lambton Ward	47	Wellington City	09	Wellington Region	2.65874e+06	5.99042e+06	1	2123700	5	970	23	2
1598300	93	552100	Fitzroy	3301	New Plymouth City Ward	33	New Plymouth District	07	Taranaki Region	2.60534e+06	6.23832e+06	1	1598300	6	984	33	2
418900	69	515500	Arch Hill	701	Western Bays Ward	7	Auckland City	02	Auckland Region	2.66582e+06	6.48015e+06	1	418900	9	1080	31	3
2123000	105	572900	Thorndon-Tinakori Road	4703	Lambton Ward	47	Wellington City	09	Wellington Region	2.65847e+06	5.99089e+06	1	2123000	3	926	35	1
1599600	171	552100	Fitzroy	3301	New Plymouth City Ward	33	New Plymouth District	07	Taranaki Region	2.60541e+06	6.2388e+06	1	1599600	10	1216	77	3
418800	87	515500	Arch Hill	701	Western Bays Ward	7	Auckland City	02	Auckland Region	2.66564e+06	6.48018e+06	1	418800	9	1080	39	3
1468500	120	545762	Longlands South	3003	Heretaunga Ward	30	Hastings District	06	Hawke's Bay Region	2.84073e+06	6.16483e+06	1	1468500	4	939	42	2
2123300	87	572900	Thorndon-Tinakori Road	4703	Lambton Ward	47	Wellington City	09	Wellington Region	2.6582e+06	5.99057e+06	1	2123300	5	967	30	2
1598401	30	552100	Fitzroy	3301	New Plymouth City Ward	33	New Plymouth District	07	Taranaki Region	2.6055e+06	6.23851e+06	1	1598401	4	944	10	2
419100	18	515500	Arch Hill	701	Western Bays Ward	7	Auckland City	02	Auckland Region	2.66592e+06	6.48006e+06	1	419100	3	918	6	1
1471800	111	545721	Karamu	3003	Heretaunga Ward	30	Hastings District	06	Hawke's Bay Region	2.84268e+06	6.16853e+06	1	1471800	7	1023	39	2
1601300	66	552200	Welbourn	3301	New Plymouth City Ward	33	New Plymouth District	07	Taranaki Region	2.60435e+06	6.23661e+06	1	1601300	9	1089	30	3
1601800	144	552200	Welbourn	3301	New Plymouth City Ward	33	New Plymouth District	07	Taranaki Region	2.60474e+06	6.23646e+06	1	1601800	7	1008	50	2
1601700	162	552200	Welbourn	3301	New Plymouth City Ward	33	New Plymouth District	07	Taranaki Region	2.60453e+06	6.23658e+06	1	1601700	7	1007	57	2
1601400	138	552200	Welbourn	3301	New Plymouth City Ward	33	New Plymouth District	07	Taranaki Region	2.6044e+06	6.2369e+06	1	1601400	2	918	46	1
1601000	93	552200	Welbourn	3301	New Plymouth City Ward	33	New Plymouth District	07	Taranaki Region	2.60431e+06	6.23697e+06	1	1601000	2	904	31	1
1600500	60	552100	Fitzroy	3301	New Plymouth City Ward	33	New Plymouth District	07	Taranaki Region	2.60584e+06	6.23896e+06	1	1600500	6	988	21	2
1601100	3	552200	Welbourn	3301	New Plymouth City Ward	33	New Plymouth District	07	Taranaki Region	2.60394e+06	6.23721e+06	1	1601100	9	1089	1	3
1600800	33	552200	Welbourn	3301	New Plymouth City Ward	33	New Plymouth District	07	Taranaki Region	2.60417e+06	6.2374e+06	1	1600800	9	1089	15	3
1469302	57	547900	Raureka	3005	Hastings Ward	30	Hastings District	06	Hawke's Bay Region	2.83867e+06	6.16563e+06	1	1469302	3	921	19	1
1469400	183	548300	Akina	3005	Hastings Ward	30	Hastings District	06	Hawke's Bay Region	2.83887e+06	6.16533e+06	1	1469400	6	977	64	2
1599800	60	552100	Fitzroy	3301	New Plymouth City Ward	33	New Plymouth District	07	Taranaki Region	2.60561e+06	6.23892e+06	1	1599800	7	1023	21	2
70204	330	503400	Maunu	205	Okara Ward	2	Whangarei District	01	Northland Region	2.62631e+06	6.60597e+06	1	70204	1	892	109	1
1600900	177	552200	Welbourn	3301	New Plymouth City Ward	33	New Plymouth District	07	Taranaki Region	2.60433e+06	6.23727e+06	1	1600900	5	959	62	2
1600600	33	552200	Welbourn	3301	New Plymouth City Ward	33	New Plymouth District	07	Taranaki Region	2.60406e+06	6.23761e+06	1	1600600	9	1089	15	3
1472300	78	545721	Karamu	3003	Heretaunga Ward	30	Hastings District	06	Hawke's Bay Region	2.84222e+06	6.16778e+06	1	1472300	8	1041	35	3
1602100	96	552200	Welbourn	3301	New Plymouth City Ward	33	New Plymouth District	07	Taranaki Region	2.6044e+06	6.23631e+06	1	1602100	7	1007	34	2
1471700	66	545721	Karamu	3003	Heretaunga Ward	30	Hastings District	06	Hawke's Bay Region	2.84215e+06	6.16813e+06	1	1471700	7	1023	23	2
1602000	81	552200	Welbourn	3301	New Plymouth City Ward	33	New Plymouth District	07	Taranaki Region	2.60445e+06	6.23612e+06	1	1602000	5	973	28	2
1601500	54	552200	Welbourn	3301	New Plymouth City Ward	33	New Plymouth District	07	Taranaki Region	2.60457e+06	6.23679e+06	1	1601500	4	945	19	2
1472000	66	545721	Karamu	3003	Heretaunga Ward	30	Hastings District	06	Hawke's Bay Region	2.84247e+06	6.16819e+06	1	1472000	5	971	23	2
1601900	129	552200	Welbourn	3301	New Plymouth City Ward	33	New Plymouth District	07	Taranaki Region	2.60482e+06	6.236e+06	1	1601900	4	940	45	2
1472900	39	545721	Karamu	3003	Heretaunga Ward	30	Hastings District	06	Hawke's Bay Region	2.84126e+06	6.16495e+06	1	1472900	4	940	14	2
2123100	99	572900	Thorndon-Tinakori Road	4703	Lambton Ward	47	Wellington City	09	Wellington Region	2.65839e+06	5.99078e+06	1	2123100	2	899	33	1
426000	45	515202	St Marys	701	Western Bays Ward	7	Auckland City	02	Auckland Region	2.66631e+06	6.48253e+06	1	426000	1	896	15	1
426100	342	515202	St Marys	701	Western Bays Ward	7	Auckland City	02	Auckland Region	2.66651e+06	6.48236e+06	1	426100	3	928	113	1
1478800	84	548500	Camberley	3005	Hastings Ward	30	Hastings District	06	Hawke's Bay Region	2.8385e+06	6.16792e+06	1	1478800	8	1058	38	3
431700	72	515302	Ponsonby East	701	Western Bays Ward	7	Auckland City	02	Auckland Region	2.66596e+06	6.48153e+06	1	431700	6	982	25	2
431600	111	515302	Ponsonby East	701	Western Bays Ward	7	Auckland City	02	Auckland Region	2.66577e+06	6.48151e+06	1	431600	6	982	39	2
431800	111	515302	Ponsonby East	701	Western Bays Ward	7	Auckland City	02	Auckland Region	2.66568e+06	6.48145e+06	1	431800	4	938	39	2
2790800	93	599500	Seaview	6404	Timaru Ward	64	Timaru District	13	Canterbury Region	2.36984e+06	5.64471e+06	1	2790800	7	1002	33	2
431400	54	515302	Ponsonby East	701	Western Bays Ward	7	Auckland City	02	Auckland Region	2.66553e+06	6.48149e+06	1	431400	4	952	19	2
1477400	102	547800	Frimley	3005	Hastings Ward	30	Hastings District	06	Hawke's Bay Region	2.83851e+06	6.16833e+06	1	1477400	4	938	36	2
1477800	90	547800	Frimley	3005	Hastings Ward	30	Hastings District	06	Hawke's Bay Region	2.83877e+06	6.16806e+06	1	1477800	8	1041	40	3
1477500	195	547800	Frimley	3005	Hastings Ward	30	Hastings District	06	Hawke's Bay Region	2.83873e+06	6.16835e+06	1	1477500	6	977	68	2
2789200	156	599400	Fraser Park	6404	Timaru Ward	64	Timaru District	13	Canterbury Region	2.36944e+06	5.64451e+06	1	2789200	4	939	55	2
1478700	30	548500	Camberley	3005	Hastings Ward	30	Hastings District	06	Hawke's Bay Region	2.83837e+06	6.16825e+06	1	1478700	10	1311	14	3
1477700	75	547800	Frimley	3005	Hastings Ward	30	Hastings District	06	Hawke's Bay Region	2.83863e+06	6.16818e+06	1	1477700	5	955	26	2
2791700	66	599500	Seaview	6404	Timaru Ward	64	Timaru District	13	Canterbury Region	2.37024e+06	5.64466e+06	1	2791700	8	1051	30	3
2791500	147	599500	Seaview	6404	Timaru Ward	64	Timaru District	13	Canterbury Region	2.37007e+06	5.64477e+06	1	2791500	8	1051	66	3
171603	72	505805	Orewa	403	Eastern Ward	4	Rodney District	02	Auckland Region	2.66188e+06	6.51174e+06	1	171603	8	1067	32	3
433102	87	514102	Auckland Central West	704	Hobson Ward	7	Auckland City	02	Auckland Region	2.66777e+06	6.48257e+06	1	433102	9	1103	39	3
2791000	126	599500	Seaview	6404	Timaru Ward	64	Timaru District	13	Canterbury Region	2.36987e+06	5.64449e+06	1	2791000	8	1037	57	3
2791100	72	599500	Seaview	6404	Timaru Ward	64	Timaru District	13	Canterbury Region	2.36967e+06	5.64434e+06	1	2791100	5	965	25	2
431900	54	515302	Ponsonby East	701	Western Bays Ward	7	Auckland City	02	Auckland Region	2.66595e+06	6.48147e+06	1	431900	4	938	19	2
431300	123	515302	Ponsonby East	701	Western Bays Ward	7	Auckland City	02	Auckland Region	2.66576e+06	6.48156e+06	1	431300	4	950	43	2
432000	102	515302	Ponsonby East	701	Western Bays Ward	7	Auckland City	02	Auckland Region	2.66579e+06	6.48139e+06	1	432000	3	927	34	1
2790700	135	599500	Seaview	6404	Timaru Ward	64	Timaru District	13	Canterbury Region	2.36966e+06	5.64472e+06	1	2790700	5	970	47	2
1479600	135	548500	Camberley	3005	Hastings Ward	30	Hastings District	06	Hawke's Bay Region	2.83812e+06	6.1677e+06	1	1479600	8	1038	61	3
432100	102	515302	Ponsonby East	701	Western Bays Ward	7	Auckland City	02	Auckland Region	2.66598e+06	6.4814e+06	1	432100	3	921	34	1
2790900	90	599500	Seaview	6404	Timaru Ward	64	Timaru District	13	Canterbury Region	2.36967e+06	5.64453e+06	1	2790900	5	965	31	2
2791200	138	599500	Seaview	6404	Timaru Ward	64	Timaru District	13	Canterbury Region	2.36988e+06	5.64428e+06	1	2791200	9	1089	62	3
431500	51	515302	Ponsonby East	701	Western Bays Ward	7	Auckland City	02	Auckland Region	2.66562e+06	6.4815e+06	1	431500	4	952	18	2
2794200	45	599500	Seaview	6404	Timaru Ward	64	Timaru District	13	Canterbury Region	2.37022e+06	5.64406e+06	1	2794200	9	1117	20	3
2794300	18	599500	Seaview	6404	Timaru Ward	64	Timaru District	13	Canterbury Region	2.3703e+06	5.64409e+06	1	2794300	9	1117	8	3
2794400	9	599500	Seaview	6404	Timaru Ward	64	Timaru District	13	Canterbury Region	2.37042e+06	5.64412e+06	1	2794400	9	1117	4	3
2794800	15	599500	Seaview	6404	Timaru Ward	64	Timaru District	13	Canterbury Region	2.3705e+06	5.64387e+06	1	2794800	9	1117	7	3
3187903	111	612802	Riverton West	7305	Riverton Ward	73	Southland District	15	Southland Region	2.12694e+06	5.41491e+06	1	3187903	6	980	39	2
3187801	21	612730	Te Waewae	7305	Riverton Ward	73	Southland District	15	Southland Region	2.12483e+06	5.4166e+06	1	3187801	7	1027	7	2
1482600	123	547900	Raureka	3005	Hastings Ward	30	Hastings District	06	Hawke's Bay Region	2.83871e+06	6.1657e+06	1	1482600	5	968	43	2
172603	111	505802	Red Beach	403	Eastern Ward	4	Rodney District	02	Auckland Region	2.66152e+06	6.50953e+06	1	172603	3	927	37	1
566500	195	518600	Royal Oak	704	Hobson Ward	7	Auckland City	02	Auckland Region	2.66837e+06	6.47609e+06	1	566500	6	975	68	2
172803	144	505802	Red Beach	403	Eastern Ward	4	Rodney District	02	Auckland Region	2.66169e+06	6.50913e+06	1	172803	5	960	50	2
2792800	6	599500	Seaview	6404	Timaru Ward	64	Timaru District	13	Canterbury Region	2.37067e+06	5.6444e+06	1	2792800	8	1061	3	3
2791900	78	599500	Seaview	6404	Timaru Ward	64	Timaru District	13	Canterbury Region	2.3701e+06	5.64444e+06	1	2791900	6	989	27	2
2792000	33	599500	Seaview	6404	Timaru Ward	64	Timaru District	13	Canterbury Region	2.37029e+06	5.64447e+06	1	2792000	6	989	12	2
2793100	3	599500	Seaview	6404	Timaru Ward	64	Timaru District	13	Canterbury Region	2.37119e+06	5.64418e+06	1	2793100	8	1061	1	3
2792700	66	599500	Seaview	6404	Timaru Ward	64	Timaru District	13	Canterbury Region	2.37076e+06	5.64448e+06	1	2792700	8	1061	30	3
50304	45	501200	Haruru Falls	102	Eastern Ward	1	Far North District	01	Northland Region	2.60639e+06	6.65734e+06	1	50304	5	958	16	2
1482400	111	547900	Raureka	3005	Hastings Ward	30	Hastings District	06	Hawke's Bay Region	2.83887e+06	6.16587e+06	1	1482400	7	1019	39	2
3185900	12	612740	Fairfax	7305	Riverton Ward	73	Southland District	15	Southland Region	2.12742e+06	5.41793e+06	1	3185900	5	960	4	2
171400	93	505805	Orewa	403	Eastern Ward	4	Rodney District	02	Auckland Region	2.66206e+06	6.51181e+06	1	171400	4	943	33	2
432200	123	515302	Ponsonby East	701	Western Bays Ward	7	Auckland City	02	Auckland Region	2.66571e+06	6.4813e+06	1	432200	2	908	41	1
171500	183	505805	Orewa	403	Eastern Ward	4	Rodney District	02	Auckland Region	2.66204e+06	6.51156e+06	1	171500	9	1101	82	3
2792500	18	599500	Seaview	6404	Timaru Ward	64	Timaru District	13	Canterbury Region	2.37037e+06	5.6447e+06	1	2792500	8	1051	8	3
432300	69	515302	Ponsonby East	701	Western Bays Ward	7	Auckland City	02	Auckland Region	2.66597e+06	6.48133e+06	1	432300	3	921	23	1
2792100	9	599500	Seaview	6404	Timaru Ward	64	Timaru District	13	Canterbury Region	2.37043e+06	5.64445e+06	1	2792100	8	1061	4	3
2791600	123	599500	Seaview	6404	Timaru Ward	64	Timaru District	13	Canterbury Region	2.37003e+06	5.64467e+06	1	2791600	7	1014	43	2
2791800	99	599500	Seaview	6404	Timaru Ward	64	Timaru District	13	Canterbury Region	2.37009e+06	5.64455e+06	1	2791800	5	958	35	2
432700	60	514102	Auckland Central West	704	Hobson Ward	7	Auckland City	02	Auckland Region	2.66696e+06	6.4821e+06	1	432700	7	1001	21	2
432900	135	514101	Auckland Harbourside	704	Hobson Ward	7	Auckland City	02	Auckland Region	2.6679e+06	6.48259e+06	1	432900	7	1023	47	2
433200	201	514102	Auckland Central West	704	Hobson Ward	7	Auckland City	02	Auckland Region	2.66787e+06	6.48246e+06	1	433200	10	1168	90	3
2792200	54	599500	Seaview	6404	Timaru Ward	64	Timaru District	13	Canterbury Region	2.37018e+06	5.64433e+06	1	2792200	6	989	19	2
2792300	27	599500	Seaview	6404	Timaru Ward	64	Timaru District	13	Canterbury Region	2.37035e+06	5.64433e+06	1	2792300	8	1061	12	3
2793000	15	599500	Seaview	6404	Timaru Ward	64	Timaru District	13	Canterbury Region	2.37092e+06	5.64425e+06	1	2793000	8	1061	7	3
432800	15	514101	Auckland Harbourside	704	Hobson Ward	7	Auckland City	02	Auckland Region	2.66778e+06	6.48274e+06	1	432800	10	1188	7	3
3185700	51	612740	Fairfax	7305	Riverton Ward	73	Southland District	15	Southland Region	2.12732e+06	5.41905e+06	1	3185700	5	960	18	2
2795700	33	599500	Seaview	6404	Timaru Ward	64	Timaru District	13	Canterbury Region	2.37075e+06	5.64392e+06	1	2795700	10	1145	15	3
2795400	9	599500	Seaview	6404	Timaru Ward	64	Timaru District	13	Canterbury Region	2.37084e+06	5.644e+06	1	2795400	10	1145	4	3
2795500	9	599500	Seaview	6404	Timaru Ward	64	Timaru District	13	Canterbury Region	2.37098e+06	5.64405e+06	1	2795500	10	1145	4	3
960200	90	527132	Hautapu	1703	Maungatautari Ward	17	Waipa District	03	Waikato Region	2.72635e+06	6.36722e+06	1	960200	3	928	30	1
3058500	45	610250	South Gore	7403	Gore Ward	74	Gore District	15	Southland Region	2.19595e+06	5.4479e+06	1	3058500	7	999	16	2
3058100	96	610250	South Gore	7403	Gore Ward	74	Gore District	15	Southland Region	2.19593e+06	5.44805e+06	1	3058100	7	999	34	2
3058000	69	610250	South Gore	7403	Gore Ward	74	Gore District	15	Southland Region	2.19573e+06	5.44801e+06	1	3058000	2	908	23	1
566700	141	518600	Royal Oak	706	Tamaki-Maungakiekie Ward	7	Auckland City	02	Auckland Region	2.66828e+06	6.47576e+06	1	566700	3	934	47	1
566600	90	518600	Royal Oak	706	Tamaki-Maungakiekie Ward	7	Auckland City	02	Auckland Region	2.66836e+06	6.47595e+06	1	566600	3	934	30	1
172502	186	505802	Red Beach	403	Eastern Ward	4	Rodney District	02	Auckland Region	2.66192e+06	6.50962e+06	1	172502	4	941	65	2
2793900	57	599500	Seaview	6404	Timaru Ward	64	Timaru District	13	Canterbury Region	2.37027e+06	5.64423e+06	1	2793900	9	1092	26	3
1482500	168	547900	Raureka	3005	Hastings Ward	30	Hastings District	06	Hawke's Bay Region	2.83878e+06	6.1658e+06	1	1482500	4	952	59	2
959101	135	527501	Cambridge North	1703	Maungatautari Ward	17	Waipa District	03	Waikato Region	2.7288e+06	6.36589e+06	1	959101	1	888	45	1
565800	120	518600	Royal Oak	704	Hobson Ward	7	Auckland City	02	Auckland Region	2.66824e+06	6.47626e+06	1	565800	3	922	40	1
172601	144	505802	Red Beach	403	Eastern Ward	4	Rodney District	02	Auckland Region	2.6616e+06	6.5096e+06	1	172601	4	942	50	2
2794700	96	599500	Seaview	6404	Timaru Ward	64	Timaru District	13	Canterbury Region	2.37018e+06	5.64388e+06	1	2794700	7	1020	34	2
3187902	9	612730	Te Waewae	7305	Riverton Ward	73	Southland District	15	Southland Region	2.12673e+06	5.41473e+06	1	3187902	6	980	3	2
566400	117	518600	Royal Oak	704	Hobson Ward	7	Auckland City	02	Auckland Region	2.66843e+06	6.47622e+06	1	566400	7	1002	41	2
172802	282	505802	Red Beach	403	Eastern Ward	4	Rodney District	02	Auckland Region	2.66143e+06	6.50853e+06	1	172802	2	917	93	1
3187904	111	612802	Riverton West	7305	Riverton Ward	73	Southland District	15	Southland Region	2.12751e+06	5.41425e+06	1	3187904	8	1041	50	3
172703	141	505802	Red Beach	403	Eastern Ward	4	Rodney District	02	Auckland Region	2.66187e+06	6.50943e+06	1	172703	8	1049	63	3
171903	135	505805	Orewa	403	Eastern Ward	4	Rodney District	02	Auckland Region	2.66151e+06	6.51055e+06	1	171903	1	882	45	1
2793800	114	599500	Seaview	6404	Timaru Ward	64	Timaru District	13	Canterbury Region	2.37003e+06	5.64426e+06	1	2793800	9	1095	51	3
172201	252	505805	Orewa	403	Eastern Ward	4	Rodney District	02	Auckland Region	2.66227e+06	6.5109e+06	1	172201	9	1089	113	3
172202	153	505805	Orewa	403	Eastern Ward	4	Rodney District	02	Auckland Region	2.66218e+06	6.51076e+06	1	172202	7	1008	54	2
172100	441	505805	Orewa	403	Eastern Ward	4	Rodney District	02	Auckland Region	2.66216e+06	6.51122e+06	1	172100	7	1021	154	2
2793600	6	599500	Seaview	6404	Timaru Ward	64	Timaru District	13	Canterbury Region	2.37107e+06	5.64404e+06	1	2793600	8	1061	3	3
172605	96	505802	Red Beach	403	Eastern Ward	4	Rodney District	02	Auckland Region	2.66144e+06	6.50908e+06	1	172605	3	927	32	1
171802	297	505805	Orewa	403	Eastern Ward	4	Rodney District	02	Auckland Region	2.66171e+06	6.51099e+06	1	171802	7	1010	104	2
172300	177	505805	Orewa	403	Eastern Ward	4	Rodney District	02	Auckland Region	2.66213e+06	6.51043e+06	1	172300	7	1025	62	2
959104	147	527501	Cambridge North	1703	Maungatautari Ward	17	Waipa District	03	Waikato Region	2.72898e+06	6.36589e+06	1	959104	1	878	49	1
959102	84	527501	Cambridge North	1703	Maungatautari Ward	17	Waipa District	03	Waikato Region	2.72878e+06	6.36618e+06	1	959102	1	874	28	1
172501	108	505802	Red Beach	403	Eastern Ward	4	Rodney District	02	Auckland Region	2.66177e+06	6.5097e+06	1	172501	4	942	38	2
438214	261	514101	Auckland Harbourside	704	Hobson Ward	7	Auckland City	02	Auckland Region	2.6689e+06	6.48228e+06	1	438214	6	982	91	2
3190800	18	612801	Riverton East	7305	Riverton Ward	73	Southland District	15	Southland Region	2.12632e+06	5.417e+06	1	3190800	9	1089	8	3
3190700	72	612801	Riverton East	7305	Riverton Ward	73	Southland District	15	Southland Region	2.12665e+06	5.41724e+06	1	3190700	8	1035	32	3
3190600	36	612801	Riverton East	7305	Riverton Ward	73	Southland District	15	Southland Region	2.12656e+06	5.41727e+06	1	3190600	8	1035	16	3
176502	411	505802	Red Beach	403	Eastern Ward	4	Rodney District	02	Auckland Region	2.66106e+06	6.50886e+06	1	176502	1	878	136	1
1487000	219	547700	St Leonards	3005	Hastings Ward	30	Hastings District	06	Hawke's Bay Region	2.83879e+06	6.16714e+06	1	1487000	7	1005	77	2
1486000	99	547700	St Leonards	3005	Hastings Ward	30	Hastings District	06	Hawke's Bay Region	2.83895e+06	6.16782e+06	1	1486000	9	1078	45	3
1486300	153	547700	St Leonards	3005	Hastings Ward	30	Hastings District	06	Hawke's Bay Region	2.83946e+06	6.16785e+06	1	1486300	6	989	54	2
1486100	99	547700	St Leonards	3005	Hastings Ward	30	Hastings District	06	Hawke's Bay Region	2.83916e+06	6.16789e+06	1	1486100	10	1300	45	3
962500	186	527501	Cambridge North	1702	Cambridge Ward	17	Waipa District	03	Waikato Region	2.72718e+06	6.36564e+06	1	962500	3	927	61	1
961600	156	527501	Cambridge North	1702	Cambridge Ward	17	Waipa District	03	Waikato Region	2.72773e+06	6.36562e+06	1	961600	2	912	51	1
961500	147	527501	Cambridge North	1702	Cambridge Ward	17	Waipa District	03	Waikato Region	2.72751e+06	6.3656e+06	1	961500	5	960	51	2
962000	69	527503	Cambridge Central	1702	Cambridge Ward	17	Waipa District	03	Waikato Region	2.72832e+06	6.36566e+06	1	962000	6	977	24	2
438103	18	514101	Auckland Harbourside	704	Hobson Ward	7	Auckland City	02	Auckland Region	2.6682e+06	6.4826e+06	1	438103	8	1060	8	3
3189800	102	612802	Riverton West	7305	Riverton Ward	73	Southland District	15	Southland Region	2.12574e+06	5.41633e+06	1	3189800	6	996	36	2
3191100	18	612801	Riverton East	7305	Riverton Ward	73	Southland District	15	Southland Region	2.12619e+06	5.41672e+06	1	3191100	9	1089	8	3
3189700	90	612802	Riverton West	7305	Riverton Ward	73	Southland District	15	Southland Region	2.12545e+06	5.41644e+06	1	3189700	4	937	31	2
1486400	72	547700	St Leonards	3005	Hastings Ward	30	Hastings District	06	Hawke's Bay Region	2.8393e+06	6.16773e+06	1	1486400	8	1067	32	3
1486600	15	547700	St Leonards	3005	Hastings Ward	30	Hastings District	06	Hawke's Bay Region	2.83873e+06	6.16775e+06	1	1486600	7	1008	5	2
438210	3	514101	Auckland Harbourside	704	Hobson Ward	7	Auckland City	02	Auckland Region	2.6686e+06	6.48262e+06	1	438210	6	982	1	2
438213	150	514101	Auckland Harbourside	704	Hobson Ward	7	Auckland City	02	Auckland Region	2.66846e+06	6.48248e+06	1	438213	5	956	52	2
438203	30	514103	Auckland Central East	704	Hobson Ward	7	Auckland City	02	Auckland Region	2.66862e+06	6.4819e+06	1	438203	8	1059	14	3
961300	132	527501	Cambridge North	1702	Cambridge Ward	17	Waipa District	03	Waikato Region	2.72793e+06	6.36609e+06	1	961300	6	991	46	2
961200	129	527501	Cambridge North	1702	Cambridge Ward	17	Waipa District	03	Waikato Region	2.72772e+06	6.36608e+06	1	961200	4	940	45	2
961400	234	527501	Cambridge North	1702	Cambridge Ward	17	Waipa District	03	Waikato Region	2.72828e+06	6.36609e+06	1	961400	4	946	82	2
961100	195	527501	Cambridge North	1702	Cambridge Ward	17	Waipa District	03	Waikato Region	2.72749e+06	6.366e+06	1	961100	5	954	68	2
566800	267	518600	Royal Oak	706	Tamaki-Maungakiekie Ward	7	Auckland City	02	Auckland Region	2.66844e+06	6.47576e+06	1	566800	2	902	88	1
2795900	24	599500	Seaview	6404	Timaru Ward	64	Timaru District	13	Canterbury Region	2.37104e+06	5.64387e+06	1	2795900	10	1145	11	3
2795600	3	599500	Seaview	6404	Timaru Ward	64	Timaru District	13	Canterbury Region	2.37064e+06	5.64387e+06	1	2795600	10	1145	1	3
2795800	15	599500	Seaview	6404	Timaru Ward	64	Timaru District	13	Canterbury Region	2.37089e+06	5.64384e+06	1	2795800	10	1145	7	3
3057800	66	610240	West Gore	7403	Gore Ward	74	Gore District	15	Southland Region	2.19546e+06	5.44814e+06	1	3057800	2	908	22	1
2794900	3	599500	Seaview	6404	Timaru Ward	64	Timaru District	13	Canterbury Region	2.37051e+06	5.64427e+06	1	2794900	10	1145	1	3
960001	195	527132	Hautapu	1703	Maungatautari Ward	17	Waipa District	03	Waikato Region	2.72513e+06	6.3659e+06	1	960001	4	939	68	2
959900	243	527132	Hautapu	1703	Maungatautari Ward	17	Waipa District	03	Waikato Region	2.72363e+06	6.36637e+06	1	959900	3	924	80	1
2795300	3	599500	Seaview	6404	Timaru Ward	64	Timaru District	13	Canterbury Region	2.37077e+06	5.64414e+06	1	2795300	10	1145	1	3
2795100	12	599500	Seaview	6404	Timaru Ward	64	Timaru District	13	Canterbury Region	2.37052e+06	5.64407e+06	1	2795100	10	1145	5	3
567000	138	518600	Royal Oak	706	Tamaki-Maungakiekie Ward	7	Auckland City	02	Auckland Region	2.66829e+06	6.47548e+06	1	567000	4	938	48	2
566900	159	518600	Royal Oak	706	Tamaki-Maungakiekie Ward	7	Auckland City	02	Auckland Region	2.66835e+06	6.4756e+06	1	566900	2	915	52	1
960002	114	527502	Cambridge West	1703	Maungatautari Ward	17	Waipa District	03	Waikato Region	2.72588e+06	6.36535e+06	1	960002	6	988	40	2
1489200	90	548200	Hastings Central	3005	Hastings Ward	30	Hastings District	06	Hawke's Bay Region	2.83917e+06	6.16647e+06	1	1489200	5	957	31	2
3060400	102	610230	Central Gore	7403	Gore Ward	74	Gore District	15	Southland Region	2.19572e+06	5.44835e+06	1	3060400	8	1059	46	3
3060500	63	610230	Central Gore	7403	Gore Ward	74	Gore District	15	Southland Region	2.196e+06	5.44832e+06	1	3060500	4	945	22	2
3060300	90	610230	Central Gore	7403	Gore Ward	74	Gore District	15	Southland Region	2.1958e+06	5.44849e+06	1	3060300	4	945	31	2
1487700	114	547700	St Leonards	3005	Hastings Ward	30	Hastings District	06	Hawke's Bay Region	2.83914e+06	6.16708e+06	1	1487700	9	1116	51	3
963500	162	527502	Cambridge West	1702	Cambridge Ward	17	Waipa District	03	Waikato Region	2.72634e+06	6.36555e+06	1	963500	4	948	57	2
963800	87	527502	Cambridge West	1702	Cambridge Ward	17	Waipa District	03	Waikato Region	2.72694e+06	6.36558e+06	1	963800	3	933	29	1
963600	144	527502	Cambridge West	1702	Cambridge Ward	17	Waipa District	03	Waikato Region	2.72658e+06	6.36556e+06	1	963600	4	949	50	2
1487500	174	547700	St Leonards	3005	Hastings Ward	30	Hastings District	06	Hawke's Bay Region	2.83888e+06	6.16701e+06	1	1487500	6	997	61	2
1488400	111	547700	St Leonards	3005	Hastings Ward	30	Hastings District	06	Hawke's Bay Region	2.83968e+06	6.1677e+06	1	1488400	6	976	39	2
3061800	45	610210	North Gore	7403	Gore Ward	74	Gore District	15	Southland Region	2.19596e+06	5.4493e+06	1	3061800	1	890	15	1
964000	123	527502	Cambridge West	1702	Cambridge Ward	17	Waipa District	03	Waikato Region	2.72634e+06	6.3653e+06	1	964000	8	1064	55	3
963700	99	527502	Cambridge West	1702	Cambridge Ward	17	Waipa District	03	Waikato Region	2.72658e+06	6.3653e+06	1	963700	3	933	33	1
964400	117	527502	Cambridge West	1702	Cambridge Ward	17	Waipa District	03	Waikato Region	2.72705e+06	6.36506e+06	1	964400	9	1082	53	3
2798900	63	599700	Parkside	6404	Timaru Ward	64	Timaru District	13	Canterbury Region	2.37034e+06	5.64371e+06	1	2798900	10	1153	28	3
2798800	81	599700	Parkside	6404	Timaru Ward	64	Timaru District	13	Canterbury Region	2.37017e+06	5.64364e+06	1	2798800	6	979	28	2
2799300	15	599700	Parkside	6404	Timaru Ward	64	Timaru District	13	Canterbury Region	2.37102e+06	5.6437e+06	1	2799300	8	1071	7	3
2799200	63	599700	Parkside	6404	Timaru Ward	64	Timaru District	13	Canterbury Region	2.37067e+06	5.6437e+06	1	2799200	10	1145	28	3
438301	18	514103	Auckland Central East	704	Hobson Ward	7	Auckland City	02	Auckland Region	2.66844e+06	6.48238e+06	1	438301	8	1059	8	3
3190100	120	612802	Riverton West	7305	Riverton Ward	73	Southland District	15	Southland Region	2.12658e+06	5.41588e+06	1	3190100	3	919	40	1
3190000	162	612802	Riverton West	7305	Riverton Ward	73	Southland District	15	Southland Region	2.12613e+06	5.41594e+06	1	3190000	4	938	57	2
438501	39	514103	Auckland Central East	704	Hobson Ward	7	Auckland City	02	Auckland Region	2.6683e+06	6.48225e+06	1	438501	7	1022	14	2
175400	18	506000	Silverdale South	403	Eastern Ward	4	Rodney District	02	Auckland Region	2.66042e+06	6.50801e+06	1	175400	6	978	6	2
438107	276	514103	Auckland Central East	704	Hobson Ward	7	Auckland City	02	Auckland Region	2.66828e+06	6.48244e+06	1	438107	8	1031	124	3
1486800	201	547700	St Leonards	3005	Hastings Ward	30	Hastings District	06	Hawke's Bay Region	2.83879e+06	6.16741e+06	1	1486800	7	1014	70	2
1487300	108	547700	St Leonards	3005	Hastings Ward	30	Hastings District	06	Hawke's Bay Region	2.83918e+06	6.16761e+06	1	1487300	6	990	38	2
438305	303	514103	Auckland Central East	704	Hobson Ward	7	Auckland City	02	Auckland Region	2.66859e+06	6.48203e+06	1	438305	10	1298	136	3
3190201	87	612802	Riverton West	7305	Riverton Ward	73	Southland District	15	Southland Region	2.12624e+06	5.41538e+06	1	3190201	5	959	30	2
438404	102	514103	Auckland Central East	704	Hobson Ward	7	Auckland City	02	Auckland Region	2.66834e+06	6.48243e+06	1	438404	5	973	36	2
1486900	18	547700	St Leonards	3005	Hastings Ward	30	Hastings District	06	Hawke's Bay Region	2.83886e+06	6.16741e+06	1	1486900	7	1014	6	2
1487100	93	547700	St Leonards	3005	Hastings Ward	30	Hastings District	06	Hawke's Bay Region	2.83894e+06	6.16734e+06	1	1487100	4	953	33	2
962200	294	527501	Cambridge North	1702	Cambridge Ward	17	Waipa District	03	Waikato Region	2.72713e+06	6.36606e+06	1	962200	4	939	103	2
3190500	66	612801	Riverton East	7305	Riverton Ward	73	Southland District	15	Southland Region	2.12696e+06	5.41765e+06	1	3190500	8	1035	30	3
3190400	12	612801	Riverton East	7305	Riverton Ward	73	Southland District	15	Southland Region	2.12667e+06	5.41769e+06	1	3190400	9	1089	5	3
3059600	48	610240	West Gore	7403	Gore Ward	74	Gore District	15	Southland Region	2.19554e+06	5.44844e+06	1	3059600	7	1008	17	2
3060200	120	610230	Central Gore	7403	Gore Ward	74	Gore District	15	Southland Region	2.19586e+06	5.44857e+06	1	3060200	2	914	40	1
1486200	156	547700	St Leonards	3005	Hastings Ward	30	Hastings District	06	Hawke's Bay Region	2.83933e+06	6.16799e+06	1	1486200	10	1181	70	3
1487200	93	547700	St Leonards	3005	Hastings Ward	30	Hastings District	06	Hawke's Bay Region	2.83909e+06	6.16729e+06	1	1487200	4	953	33	2
1485900	78	547700	St Leonards	3005	Hastings Ward	30	Hastings District	06	Hawke's Bay Region	2.83903e+06	6.16802e+06	1	1485900	8	1067	35	3
962100	132	527501	Cambridge North	1702	Cambridge Ward	17	Waipa District	03	Waikato Region	2.72772e+06	6.36586e+06	1	962100	6	977	46	2
961900	177	527501	Cambridge North	1702	Cambridge Ward	17	Waipa District	03	Waikato Region	2.72839e+06	6.36586e+06	1	961900	6	980	62	2
961800	180	527501	Cambridge North	1702	Cambridge Ward	17	Waipa District	03	Waikato Region	2.72817e+06	6.36585e+06	1	961800	7	1003	63	2
962400	138	527501	Cambridge North	1702	Cambridge Ward	17	Waipa District	03	Waikato Region	2.72728e+06	6.36584e+06	1	962400	5	959	48	2
962300	129	527501	Cambridge North	1702	Cambridge Ward	17	Waipa District	03	Waikato Region	2.72706e+06	6.36583e+06	1	962300	8	1042	58	3
175600	39	506000	Silverdale South	403	Eastern Ward	4	Rodney District	02	Auckland Region	2.66026e+06	6.50748e+06	1	175600	4	941	14	2
3191300	156	612801	Riverton East	7305	Riverton Ward	73	Southland District	15	Southland Region	2.12647e+06	5.41669e+06	1	3191300	9	1073	70	3
3190900	18	612801	Riverton East	7305	Riverton Ward	73	Southland District	15	Southland Region	2.12637e+06	5.41695e+06	1	3190900	9	1089	8	3
3191000	6	612801	Riverton East	7305	Riverton Ward	73	Southland District	15	Southland Region	2.12618e+06	5.41683e+06	1	3191000	9	1089	3	3
438106	3	514103	Auckland Central East	704	Hobson Ward	7	Auckland City	02	Auckland Region	2.66813e+06	6.48239e+06	1	438106	8	1031	1	3
962601	177	527503	Cambridge Central	1702	Cambridge Ward	17	Waipa District	03	Waikato Region	2.72722e+06	6.36546e+06	1	962601	7	1025	62	2
963100	66	527503	Cambridge Central	1702	Cambridge Ward	17	Waipa District	03	Waikato Region	2.72793e+06	6.36494e+06	1	963100	9	1099	30	3
438402	183	514103	Auckland Central East	704	Hobson Ward	7	Auckland City	02	Auckland Region	2.6684e+06	6.48233e+06	1	438402	9	1082	82	3
437900	159	514101	Auckland Harbourside	704	Hobson Ward	7	Auckland City	02	Auckland Region	2.66804e+06	6.48264e+06	1	437900	8	1064	72	3
3189900	63	612802	Riverton West	7305	Riverton Ward	73	Southland District	15	Southland Region	2.12582e+06	5.41596e+06	1	3189900	4	937	22	2
438000	108	514103	Auckland Central East	704	Hobson Ward	7	Auckland City	02	Auckland Region	2.66798e+06	6.48251e+06	1	438000	8	1060	49	3
438206	156	514101	Auckland Harbourside	704	Hobson Ward	7	Auckland City	02	Auckland Region	2.66886e+06	6.48205e+06	1	438206	4	953	55	2
1486500	39	547700	St Leonards	3005	Hastings Ward	30	Hastings District	06	Hawke's Bay Region	2.83866e+06	6.16754e+06	1	1486500	7	1008	14	2
1486700	93	547700	St Leonards	3005	Hastings Ward	30	Hastings District	06	Hawke's Bay Region	2.83879e+06	6.16766e+06	1	1486700	7	1008	33	2
1487400	84	547700	St Leonards	3005	Hastings Ward	30	Hastings District	06	Hawke's Bay Region	2.8391e+06	6.16771e+06	1	1487400	6	990	29	2
962900	33	527503	Cambridge Central	1702	Cambridge Ward	17	Waipa District	03	Waikato Region	2.72753e+06	6.36488e+06	1	962900	9	1099	15	3
962700	3	527503	Cambridge Central	1702	Cambridge Ward	17	Waipa District	03	Waikato Region	2.72732e+06	6.36485e+06	1	962700	9	1099	1	3
438102	3	514103	Auckland Central East	704	Hobson Ward	7	Auckland City	02	Auckland Region	2.66795e+06	6.48243e+06	1	438102	8	1060	1	3
962800	3	527503	Cambridge Central	1702	Cambridge Ward	17	Waipa District	03	Waikato Region	2.72737e+06	6.36469e+06	1	962800	9	1099	1	3
963000	30	527503	Cambridge Central	1702	Cambridge Ward	17	Waipa District	03	Waikato Region	2.72751e+06	6.36467e+06	1	963000	9	1099	14	3
437800	144	514103	Auckland Central East	704	Hobson Ward	7	Auckland City	02	Auckland Region	2.66821e+06	6.48229e+06	1	437800	8	1061	65	3
3190300	60	612801	Riverton East	7305	Riverton Ward	73	Southland District	15	Southland Region	2.1268e+06	5.41797e+06	1	3190300	8	1035	27	3
438405	219	514103	Auckland Central East	704	Hobson Ward	7	Auckland City	02	Auckland Region	2.66835e+06	6.48232e+06	1	438405	9	1121	99	3
3060100	120	610230	Central Gore	7403	Gore Ward	74	Gore District	15	Southland Region	2.19584e+06	5.44867e+06	1	3060100	2	906	40	1
3060000	144	610230	Central Gore	7403	Gore Ward	74	Gore District	15	Southland Region	2.1958e+06	5.44878e+06	1	3060000	4	950	50	2
1489300	48	548200	Hastings Central	3005	Hastings Ward	30	Hastings District	06	Hawke's Bay Region	2.83933e+06	6.16665e+06	1	1489300	9	1131	22	3
966100	207	527504	Leamington West	1702	Cambridge Ward	17	Waipa District	03	Waikato Region	2.72784e+06	6.36361e+06	1	966100	6	986	72	2
965505	15	527505	Leamington East	1702	Cambridge Ward	17	Waipa District	03	Waikato Region	2.7283e+06	6.36383e+06	1	965505	2	900	5	1
966200	192	527505	Leamington East	1702	Cambridge Ward	17	Waipa District	03	Waikato Region	2.72806e+06	6.36353e+06	1	966200	5	964	67	2
1490100	12	548200	Hastings Central	3005	Hastings Ward	30	Hastings District	06	Hawke's Bay Region	2.83946e+06	6.16708e+06	1	1490100	8	1051	5	3
3062400	60	610210	North Gore	7403	Gore Ward	74	Gore District	15	Southland Region	2.19617e+06	5.44947e+06	1	3062400	9	1088	27	3
1488700	57	548200	Hastings Central	3005	Hastings Ward	30	Hastings District	06	Hawke's Bay Region	2.83928e+06	6.16691e+06	1	1488700	8	1041	26	3
1487600	120	547700	St Leonards	3005	Hastings Ward	30	Hastings District	06	Hawke's Bay Region	2.83888e+06	6.16687e+06	1	1487600	4	950	42	2
1488100	51	547700	St Leonards	3005	Hastings Ward	30	Hastings District	06	Hawke's Bay Region	2.83939e+06	6.16758e+06	1	1488100	7	1006	18	2
2799800	96	599700	Parkside	6404	Timaru Ward	64	Timaru District	13	Canterbury Region	2.37066e+06	5.6433e+06	1	2799800	9	1085	43	3
2799100	90	599700	Parkside	6404	Timaru Ward	64	Timaru District	13	Canterbury Region	2.37025e+06	5.64338e+06	1	2799100	8	1071	40	3
2799600	69	599700	Parkside	6404	Timaru Ward	64	Timaru District	13	Canterbury Region	2.37072e+06	5.64347e+06	1	2799600	8	1071	31	3
2799700	39	599700	Parkside	6404	Timaru Ward	64	Timaru District	13	Canterbury Region	2.37093e+06	5.64347e+06	1	2799700	8	1071	18	3
1488500	147	548200	Hastings Central	3005	Hastings Ward	30	Hastings District	06	Hawke's Bay Region	2.83897e+06	6.16676e+06	1	1488500	7	1026	51	2
3060800	3	610230	Central Gore	7403	Gore Ward	74	Gore District	15	Southland Region	2.19631e+06	5.4489e+06	1	3060800	8	1071	1	3
1489100	138	548200	Hastings Central	3005	Hastings Ward	30	Hastings District	06	Hawke's Bay Region	2.83923e+06	6.16659e+06	1	1489100	8	1054	62	3
3061300	3	610230	Central Gore	7403	Gore Ward	74	Gore District	15	Southland Region	2.19627e+06	5.44855e+06	1	3061300	8	1071	1	3
3061400	3	610230	Central Gore	7403	Gore Ward	74	Gore District	15	Southland Region	2.19632e+06	5.44849e+06	1	3061400	8	1071	1	3
1487900	33	547700	St Leonards	3005	Hastings Ward	30	Hastings District	06	Hawke's Bay Region	2.83929e+06	6.16731e+06	1	1487900	7	1006	12	2
3060600	66	610230	Central Gore	7403	Gore Ward	74	Gore District	15	Southland Region	2.19572e+06	5.44816e+06	1	3060600	8	1059	30	3
3060700	96	610230	Central Gore	7403	Gore Ward	74	Gore District	15	Southland Region	2.19597e+06	5.44818e+06	1	3060700	8	1071	43	3
963900	171	527502	Cambridge West	1702	Cambridge Ward	17	Waipa District	03	Waikato Region	2.7269e+06	6.36531e+06	1	963900	5	973	60	2
1488300	168	547700	St Leonards	3005	Hastings Ward	30	Hastings District	06	Hawke's Bay Region	2.83956e+06	6.16758e+06	1	1488300	7	1001	59	2
964100	198	527502	Cambridge West	1702	Cambridge Ward	17	Waipa District	03	Waikato Region	2.72636e+06	6.36507e+06	1	964100	4	949	69	2
964300	165	527502	Cambridge West	1702	Cambridge Ward	17	Waipa District	03	Waikato Region	2.72684e+06	6.36507e+06	1	964300	8	1070	74	3
964200	108	527502	Cambridge West	1702	Cambridge Ward	17	Waipa District	03	Waikato Region	2.72659e+06	6.36506e+06	1	964200	4	939	38	2
964800	72	527502	Cambridge West	1702	Cambridge Ward	17	Waipa District	03	Waikato Region	2.727e+06	6.36472e+06	1	964800	6	985	25	2
2799400	21	599700	Parkside	6404	Timaru Ward	64	Timaru District	13	Canterbury Region	2.37069e+06	5.64358e+06	1	2799400	6	983	7	2
2799000	12	599700	Parkside	6404	Timaru Ward	64	Timaru District	13	Canterbury Region	2.37034e+06	5.64344e+06	1	2799000	6	998	4	2
1488600	111	548200	Hastings Central	3005	Hastings Ward	30	Hastings District	06	Hawke's Bay Region	2.8392e+06	6.16683e+06	1	1488600	9	1086	50	3
1488200	75	547700	St Leonards	3005	Hastings Ward	30	Hastings District	06	Hawke's Bay Region	2.83949e+06	6.16744e+06	1	1488200	6	976	26	2
1488000	144	547700	St Leonards	3005	Hastings Ward	30	Hastings District	06	Hawke's Bay Region	2.83935e+06	6.16743e+06	1	1488000	9	1082	65	3
1487800	24	547700	St Leonards	3005	Hastings Ward	30	Hastings District	06	Hawke's Bay Region	2.8392e+06	6.16743e+06	1	1487800	7	1006	8	2
964500	72	527502	Cambridge West	1702	Cambridge Ward	17	Waipa District	03	Waikato Region	2.72638e+06	6.36485e+06	1	964500	5	955	25	2
964600	117	527502	Cambridge West	1702	Cambridge Ward	17	Waipa District	03	Waikato Region	2.72661e+06	6.36481e+06	1	964600	5	955	41	2
964700	132	527502	Cambridge West	1702	Cambridge Ward	17	Waipa District	03	Waikato Region	2.72685e+06	6.36472e+06	1	964700	7	1013	46	2
1489000	3	548200	Hastings Central	3005	Hastings Ward	30	Hastings District	06	Hawke's Bay Region	2.83953e+06	6.1668e+06	1	1489000	8	1041	1	3
3061000	6	610230	Central Gore	7403	Gore Ward	74	Gore District	15	Southland Region	2.19632e+06	5.44877e+06	1	3061000	8	1071	3	3
3061100	3	610230	Central Gore	7403	Gore Ward	74	Gore District	15	Southland Region	2.1963e+06	5.44865e+06	1	3061100	8	1071	1	3
963200	201	527502	Cambridge West	1702	Cambridge Ward	17	Waipa District	03	Waikato Region	2.72632e+06	6.36593e+06	1	963200	3	928	66	1
963400	243	527502	Cambridge West	1702	Cambridge Ward	17	Waipa District	03	Waikato Region	2.7268e+06	6.36592e+06	1	963400	4	939	85	2
963300	237	527502	Cambridge West	1702	Cambridge Ward	17	Waipa District	03	Waikato Region	2.72656e+06	6.36592e+06	1	963300	4	952	83	2
1492200	12	548200	Hastings Central	3005	Hastings Ward	30	Hastings District	06	Hawke's Bay Region	2.83995e+06	6.16662e+06	1	1492200	9	1108	5	3
3064400	12	610230	Central Gore	7403	Gore Ward	74	Gore District	15	Southland Region	2.19642e+06	5.44828e+06	1	3064400	9	1080	5	3
1491000	6	548200	Hastings Central	3005	Hastings Ward	30	Hastings District	06	Hawke's Bay Region	2.83997e+06	6.16714e+06	1	1491000	8	1041	3	3
3063900	57	610210	North Gore	7403	Gore Ward	74	Gore District	15	Southland Region	2.19595e+06	5.44952e+06	1	3063900	4	944	20	2
2802900	156	599800	Timaru Gardens	6404	Timaru Ward	64	Timaru District	13	Canterbury Region	2.37068e+06	5.64247e+06	1	2802900	8	1039	70	3
2802000	60	599800	Timaru Gardens	6404	Timaru Ward	64	Timaru District	13	Canterbury Region	2.37017e+06	5.64258e+06	1	2802000	8	1046	27	3
2802800	75	599800	Timaru Gardens	6404	Timaru Ward	64	Timaru District	13	Canterbury Region	2.37046e+06	5.64255e+06	1	2802800	10	1172	34	3
2801900	183	599800	Timaru Gardens	6404	Timaru Ward	64	Timaru District	13	Canterbury Region	2.37003e+06	5.64252e+06	1	2801900	7	1009	64	2
968302	78	531003	Te Awamutu East	1704	Te Awamutu Ward	17	Waipa District	03	Waikato Region	2.71451e+06	6.35251e+06	1	968302	6	981	27	2
3064700	39	610250	South Gore	7403	Gore Ward	74	Gore District	15	Southland Region	2.19628e+06	5.44788e+06	1	3064700	8	1041	18	3
3064800	45	610250	South Gore	7403	Gore Ward	74	Gore District	15	Southland Region	2.19615e+06	5.44786e+06	1	3064800	7	1018	16	2
967201	102	527505	Leamington East	1702	Cambridge Ward	17	Waipa District	03	Waikato Region	2.72808e+06	6.36301e+06	1	967201	8	1067	46	3
2803000	78	599800	Timaru Gardens	6404	Timaru Ward	64	Timaru District	13	Canterbury Region	2.37039e+06	5.64228e+06	1	2803000	8	1042	35	3
2803100	93	599800	Timaru Gardens	6404	Timaru Ward	64	Timaru District	13	Canterbury Region	2.37062e+06	5.64231e+06	1	2803100	5	970	33	2
2803200	90	599800	Timaru Gardens	6404	Timaru Ward	64	Timaru District	13	Canterbury Region	2.37095e+06	5.64238e+06	1	2803200	8	1042	40	3
2803300	3	599800	Timaru Gardens	6404	Timaru Ward	64	Timaru District	13	Canterbury Region	2.37127e+06	5.64228e+06	1	2803300	7	1012	1	2
50400	81	501200	Haruru Falls	102	Eastern Ward	1	Far North District	01	Northland Region	2.60688e+06	6.6571e+06	1	50400	7	1022	28	2
50803	63	501200	Haruru Falls	102	Eastern Ward	1	Far North District	01	Northland Region	2.60656e+06	6.65711e+06	1	50803	8	1036	28	3
50806	3	501200	Haruru Falls	102	Eastern Ward	1	Far North District	01	Northland Region	2.60604e+06	6.65707e+06	1	50806	8	1036	1	3
2801000	84	599700	Parkside	6404	Timaru Ward	64	Timaru District	13	Canterbury Region	2.37102e+06	5.64328e+06	1	2801000	10	1149	38	3
2801100	27	599700	Parkside	6404	Timaru Ward	64	Timaru District	13	Canterbury Region	2.37116e+06	5.64323e+06	1	2801100	10	1149	12	3
1489900	6	548200	Hastings Central	3005	Hastings Ward	30	Hastings District	06	Hawke's Bay Region	2.8396e+06	6.16652e+06	1	1489900	8	1052	3	3
3062700	27	610210	North Gore	7403	Gore Ward	74	Gore District	15	Southland Region	2.19625e+06	5.44902e+06	1	3062700	9	1105	12	3
1490400	198	548200	Hastings Central	3005	Hastings Ward	30	Hastings District	06	Hawke's Bay Region	2.83977e+06	6.1673e+06	1	1490400	10	1145	89	3
965501	186	527505	Leamington East	1702	Cambridge Ward	17	Waipa District	03	Waikato Region	2.72845e+06	6.36424e+06	1	965501	2	916	61	1
965000	30	527503	Cambridge Central	1702	Cambridge Ward	17	Waipa District	03	Waikato Region	2.72709e+06	6.36453e+06	1	965000	5	969	10	2
965800	51	527504	Leamington West	1702	Cambridge Ward	17	Waipa District	03	Waikato Region	2.72801e+06	6.36395e+06	1	965800	4	942	18	2
965100	15	527503	Cambridge Central	1702	Cambridge Ward	17	Waipa District	03	Waikato Region	2.72741e+06	6.36447e+06	1	965100	5	969	5	2
965200	27	527503	Cambridge Central	1702	Cambridge Ward	17	Waipa District	03	Waikato Region	2.72758e+06	6.36451e+06	1	965200	5	969	9	2
965400	159	527503	Cambridge Central	1702	Cambridge Ward	17	Waipa District	03	Waikato Region	2.72781e+06	6.36437e+06	1	965400	5	969	56	2
2800800	129	599700	Parkside	6404	Timaru Ward	64	Timaru District	13	Canterbury Region	2.37039e+06	5.64305e+06	1	2800800	9	1111	58	3
2800700	30	599700	Parkside	6404	Timaru Ward	64	Timaru District	13	Canterbury Region	2.37026e+06	5.64299e+06	1	2800700	8	1039	14	3
2801300	87	599700	Parkside	6404	Timaru Ward	64	Timaru District	13	Canterbury Region	2.37085e+06	5.643e+06	1	2801300	10	1192	39	3
2801200	153	599700	Parkside	6404	Timaru Ward	64	Timaru District	13	Canterbury Region	2.37062e+06	5.64303e+06	1	2801200	8	1063	69	3
1489700	114	548200	Hastings Central	3005	Hastings Ward	30	Hastings District	06	Hawke's Bay Region	2.83936e+06	6.16628e+06	1	1489700	8	1052	51	3
1489400	42	548200	Hastings Central	3005	Hastings Ward	30	Hastings District	06	Hawke's Bay Region	2.83943e+06	6.16672e+06	1	1489400	9	1131	19	3
1490300	126	548200	Hastings Central	3005	Hastings Ward	30	Hastings District	06	Hawke's Bay Region	2.83966e+06	6.16722e+06	1	1490300	7	1019	44	2
966000	219	527504	Leamington West	1702	Cambridge Ward	17	Waipa District	03	Waikato Region	2.72766e+06	6.36377e+06	1	966000	5	954	77	2
965502	207	527505	Leamington East	1702	Cambridge Ward	17	Waipa District	03	Waikato Region	2.7282e+06	6.36393e+06	1	965502	2	912	68	1
965300	6	527503	Cambridge Central	1702	Cambridge Ward	17	Waipa District	03	Waikato Region	2.72763e+06	6.36424e+06	1	965300	5	969	2	2
1490900	33	548200	Hastings Central	3005	Hastings Ward	30	Hastings District	06	Hawke's Bay Region	2.83981e+06	6.16701e+06	1	1490900	8	1041	15	3
1489801	42	548200	Hastings Central	3005	Hastings Ward	30	Hastings District	06	Hawke's Bay Region	2.83942e+06	6.16654e+06	1	1489801	8	1052	19	3
3062900	15	610210	North Gore	7403	Gore Ward	74	Gore District	15	Southland Region	2.1964e+06	5.44921e+06	1	3062900	9	1105	7	3
3062500	48	610210	North Gore	7403	Gore Ward	74	Gore District	15	Southland Region	2.19618e+06	5.44932e+06	1	3062500	7	1014	17	2
3062600	51	610210	North Gore	7403	Gore Ward	74	Gore District	15	Southland Region	2.19627e+06	5.44913e+06	1	3062600	7	1014	18	2
1490700	18	548200	Hastings Central	3005	Hastings Ward	30	Hastings District	06	Hawke's Bay Region	2.83961e+06	6.16686e+06	1	1490700	8	1041	8	3
3062200	87	610210	North Gore	7403	Gore Ward	74	Gore District	15	Southland Region	2.19594e+06	5.44897e+06	1	3062200	8	1051	39	3
1490500	135	548200	Hastings Central	3005	Hastings Ward	30	Hastings District	06	Hawke's Bay Region	2.83989e+06	6.16741e+06	1	1490500	5	968	47	2
2800300	9	599700	Parkside	6404	Timaru Ward	64	Timaru District	13	Canterbury Region	2.3702e+06	5.64326e+06	1	2800300	6	976	3	2
2800400	66	599700	Parkside	6404	Timaru Ward	64	Timaru District	13	Canterbury Region	2.37038e+06	5.64323e+06	1	2800400	8	1039	30	3
2800900	75	599700	Parkside	6404	Timaru Ward	64	Timaru District	13	Canterbury Region	2.37085e+06	5.64328e+06	1	2800900	6	983	26	2
2801400	93	599700	Parkside	6404	Timaru Ward	64	Timaru District	13	Canterbury Region	2.37103e+06	5.64306e+06	1	2801400	7	1007	33	2
1489802	21	548200	Hastings Central	3005	Hastings Ward	30	Hastings District	06	Hawke's Bay Region	2.83949e+06	6.16642e+06	1	1489802	8	1052	9	3
1494400	3	548200	Hastings Central	3005	Hastings Ward	30	Hastings District	06	Hawke's Bay Region	2.84023e+06	6.16665e+06	1	1494400	8	1046	1	3
969400	69	531002	Te Awamutu Central	1704	Te Awamutu Ward	17	Waipa District	03	Waikato Region	2.71328e+06	6.35269e+06	1	969400	6	998	24	2
970000	153	531002	Te Awamutu Central	1704	Te Awamutu Ward	17	Waipa District	03	Waikato Region	2.71389e+06	6.35265e+06	1	970000	7	1014	54	2
1493800	18	548200	Hastings Central	3005	Hastings Ward	30	Hastings District	06	Hawke's Bay Region	2.84007e+06	6.16608e+06	1	1493800	9	1108	8	3
1494000	93	548200	Hastings Central	3005	Hastings Ward	30	Hastings District	06	Hawke's Bay Region	2.84018e+06	6.16612e+06	1	1494000	10	1356	42	3
1494300	78	548200	Hastings Central	3005	Hastings Ward	30	Hastings District	06	Hawke's Bay Region	2.8406e+06	6.16707e+06	1	1494300	9	1108	35	3
2803500	114	599800	Timaru Gardens	6404	Timaru Ward	64	Timaru District	13	Canterbury Region	2.37058e+06	5.64217e+06	1	2803500	7	1012	40	2
2803600	132	599800	Timaru Gardens	6404	Timaru Ward	64	Timaru District	13	Canterbury Region	2.37096e+06	5.64225e+06	1	2803600	8	1059	59	3
2803700	81	599900	Redruth	6404	Timaru Ward	64	Timaru District	13	Canterbury Region	2.37034e+06	5.64192e+06	1	2803700	8	1059	36	3
51402	27	501100	Paihia	102	Eastern Ward	1	Far North District	01	Northland Region	2.61085e+06	6.655e+06	1	51402	2	912	9	1
51406	171	501100	Paihia	102	Eastern Ward	1	Far North District	01	Northland Region	2.61054e+06	6.65486e+06	1	51406	5	958	60	2
51408	93	501100	Paihia	102	Eastern Ward	1	Far North District	01	Northland Region	2.6106e+06	6.65454e+06	1	51408	6	980	33	2
51401	114	501612	Opua West	102	Eastern Ward	1	Far North District	01	Northland Region	2.61135e+06	6.65416e+06	1	51401	2	912	38	1
969600	129	531002	Te Awamutu Central	1704	Te Awamutu Ward	17	Waipa District	03	Waikato Region	2.71345e+06	6.35246e+06	1	969600	6	984	45	2
51409	78	501100	Paihia	102	Eastern Ward	1	Far North District	01	Northland Region	2.61049e+06	6.65432e+06	1	51409	6	980	27	2
967801	114	527505	Leamington East	1702	Cambridge Ward	17	Waipa District	03	Waikato Region	2.72752e+06	6.36232e+06	1	967801	7	1022	40	2
967602	294	527504	Leamington West	1702	Cambridge Ward	17	Waipa District	03	Waikato Region	2.72737e+06	6.3624e+06	1	967602	5	965	103	2
443700	132	515700	Epsom North	704	Hobson Ward	7	Auckland City	02	Auckland Region	2.66837e+06	6.47935e+06	1	443700	3	919	44	1
1492000	3	548200	Hastings Central	3005	Hastings Ward	30	Hastings District	06	Hawke's Bay Region	2.83978e+06	6.16647e+06	1	1492000	9	1108	1	3
1492600	18	548200	Hastings Central	3005	Hastings Ward	30	Hastings District	06	Hawke's Bay Region	2.83986e+06	6.16636e+06	1	1492600	9	1108	8	3
3064300	3	610230	Central Gore	7403	Gore Ward	74	Gore District	15	Southland Region	2.19649e+06	5.44847e+06	1	3064300	9	1080	1	3
2802300	6	599800	Timaru Gardens	6404	Timaru Ward	64	Timaru District	13	Canterbury Region	2.37113e+06	5.64292e+06	1	2802300	8	1054	3	3
2801800	120	599800	Timaru Gardens	6404	Timaru Ward	64	Timaru District	13	Canterbury Region	2.37037e+06	5.64282e+06	1	2801800	9	1128	54	3
2802600	66	599800	Timaru Gardens	6404	Timaru Ward	64	Timaru District	13	Canterbury Region	2.37042e+06	5.64268e+06	1	2802600	7	1019	23	2
1492400	9	548200	Hastings Central	3005	Hastings Ward	30	Hastings District	06	Hawke's Bay Region	2.83965e+06	6.16624e+06	1	1492400	9	1108	4	3
3064500	69	610250	South Gore	7403	Gore Ward	74	Gore District	15	Southland Region	2.19649e+06	5.448e+06	1	3064500	9	1080	31	3
3064600	60	610250	South Gore	7403	Gore Ward	74	Gore District	15	Southland Region	2.19638e+06	5.44792e+06	1	3064600	8	1041	27	3
967000	306	527505	Leamington East	1702	Cambridge Ward	17	Waipa District	03	Waikato Region	2.72788e+06	6.3631e+06	1	967000	6	976	107	2
966900	210	527504	Leamington West	1702	Cambridge Ward	17	Waipa District	03	Waikato Region	2.72764e+06	6.36313e+06	1	966900	8	1062	94	3
967300	39	527504	Leamington West	1702	Cambridge Ward	17	Waipa District	03	Waikato Region	2.7276e+06	6.36345e+06	1	967300	8	1067	18	3
443500	171	515700	Epsom North	704	Hobson Ward	7	Auckland City	02	Auckland Region	2.66861e+06	6.47917e+06	1	443500	8	1042	77	3
1492100	18	548200	Hastings Central	3005	Hastings Ward	30	Hastings District	06	Hawke's Bay Region	2.83988e+06	6.16653e+06	1	1492100	9	1108	8	3
967700	240	527505	Leamington East	1702	Cambridge Ward	17	Waipa District	03	Waikato Region	2.72771e+06	6.36265e+06	1	967700	8	1039	108	3
967601	213	527504	Leamington West	1702	Cambridge Ward	17	Waipa District	03	Waikato Region	2.72749e+06	6.36276e+06	1	967601	5	963	75	2
967402	237	527504	Leamington West	1702	Cambridge Ward	17	Waipa District	03	Waikato Region	2.72728e+06	6.36284e+06	1	967402	8	1035	107	3
1491400	21	548200	Hastings Central	3005	Hastings Ward	30	Hastings District	06	Hawke's Bay Region	2.8399e+06	6.1669e+06	1	1491400	6	986	7	2
443900	3	515700	Epsom North	704	Hobson Ward	7	Auckland City	02	Auckland Region	2.6682e+06	6.47934e+06	1	443900	4	935	1	2
967802	81	527505	Leamington East	1702	Cambridge Ward	17	Waipa District	03	Waikato Region	2.72762e+06	6.36229e+06	1	967802	7	1022	28	2
50503	6	501615	Waitangi	102	Eastern Ward	1	Far North District	01	Northland Region	2.60835e+06	6.66041e+06	1	50503	5	959	2	2
443400	150	515700	Epsom North	704	Hobson Ward	7	Auckland City	02	Auckland Region	2.66865e+06	6.4793e+06	1	443400	6	981	52	2
50301	270	501200	Haruru Falls	102	Eastern Ward	1	Far North District	01	Northland Region	2.6073e+06	6.65733e+06	1	50301	7	1022	94	2
50701	21	501200	Haruru Falls	102	Eastern Ward	1	Far North District	01	Northland Region	2.60632e+06	6.65734e+06	1	50701	6	984	7	2
50306	60	501200	Haruru Falls	102	Eastern Ward	1	Far North District	01	Northland Region	2.60705e+06	6.65738e+06	1	50306	7	1016	21	2
50305	60	501200	Haruru Falls	102	Eastern Ward	1	Far North District	01	Northland Region	2.60693e+06	6.6573e+06	1	50305	5	958	21	2
2802400	93	599800	Timaru Gardens	6404	Timaru Ward	64	Timaru District	13	Canterbury Region	2.37135e+06	5.64273e+06	1	2802400	8	1054	42	3
447400	102	515801	Epsom Central	704	Hobson Ward	7	Auckland City	02	Auckland Region	2.66833e+06	6.47716e+06	1	447400	6	993	36	2
971500	156	531002	Te Awamutu Central	1704	Te Awamutu Ward	17	Waipa District	03	Waikato Region	2.71355e+06	6.35222e+06	1	971500	6	988	55	2
1495100	66	548200	Hastings Central	3005	Hastings Ward	30	Hastings District	06	Hawke's Bay Region	2.84073e+06	6.16659e+06	1	1495100	9	1080	30	3
1496200	114	548000	Mayfair	3005	Hastings Ward	30	Hastings District	06	Hawke's Bay Region	2.84118e+06	6.16792e+06	1	1496200	3	919	38	1
1495000	81	548200	Hastings Central	3005	Hastings Ward	30	Hastings District	06	Hawke's Bay Region	2.84062e+06	6.16652e+06	1	1495000	9	1080	36	3
446000	90	515801	Epsom Central	704	Hobson Ward	7	Auckland City	02	Auckland Region	2.66848e+06	6.47829e+06	1	446000	3	932	30	1
446300	258	515801	Epsom Central	704	Hobson Ward	7	Auckland City	02	Auckland Region	2.66842e+06	6.47793e+06	1	446300	3	918	85	1
54100	24	501100	Paihia	102	Eastern Ward	1	Far North District	01	Northland Region	2.60922e+06	6.65729e+06	1	54100	4	946	8	2
54200	195	501100	Paihia	102	Eastern Ward	1	Far North District	01	Northland Region	2.60982e+06	6.657e+06	1	54200	6	985	68	2
54300	27	501100	Paihia	102	Eastern Ward	1	Far North District	01	Northland Region	2.61003e+06	6.65703e+06	1	54300	10	1335	12	3
54502	51	501100	Paihia	102	Eastern Ward	1	Far North District	01	Northland Region	2.61028e+06	6.65657e+06	1	54502	6	975	18	2
970300	75	531002	Te Awamutu Central	1704	Te Awamutu Ward	17	Waipa District	03	Waikato Region	2.71425e+06	6.35249e+06	1	970300	9	1089	34	3
51403	72	501612	Opua West	102	Eastern Ward	1	Far North District	01	Northland Region	2.61168e+06	6.65348e+06	1	51403	6	980	25	2
1493600	156	548200	Hastings Central	3005	Hastings Ward	30	Hastings District	06	Hawke's Bay Region	2.83985e+06	6.16596e+06	1	1493600	10	1141	70	3
620400	132	519500	Penrose	706	Tamaki-Maungakiekie Ward	7	Auckland City	02	Auckland Region	2.6712e+06	6.47623e+06	1	620400	6	991	46	2
1492800	3	548200	Hastings Central	3005	Hastings Ward	30	Hastings District	06	Hawke's Bay Region	2.84003e+06	6.16652e+06	1	1492800	9	1108	1	3
969300	78	531002	Te Awamutu Central	1704	Te Awamutu Ward	17	Waipa District	03	Waikato Region	2.71335e+06	6.35284e+06	1	969300	6	998	27	2
969201	39	531001	Te Awamutu West	1704	Te Awamutu Ward	17	Waipa District	03	Waikato Region	2.71278e+06	6.35295e+06	1	969201	7	1028	14	2
444200	72	515700	Epsom North	704	Hobson Ward	7	Auckland City	02	Auckland Region	2.66834e+06	6.47912e+06	1	444200	4	935	25	2
969202	45	531001	Te Awamutu West	1704	Te Awamutu Ward	17	Waipa District	03	Waikato Region	2.71275e+06	6.35275e+06	1	969202	7	1028	16	2
969900	90	531002	Te Awamutu Central	1704	Te Awamutu Ward	17	Waipa District	03	Waikato Region	2.71397e+06	6.35281e+06	1	969900	5	965	31	2
970100	69	531002	Te Awamutu Central	1704	Te Awamutu Ward	17	Waipa District	03	Waikato Region	2.71421e+06	6.3527e+06	1	970100	9	1089	31	3
1493900	3	548200	Hastings Central	3005	Hastings Ward	30	Hastings District	06	Hawke's Bay Region	2.84012e+06	6.1662e+06	1	1493900	7	1002	1	2
969800	243	531003	Te Awamutu East	1704	Te Awamutu Ward	17	Waipa District	03	Waikato Region	2.71416e+06	6.35308e+06	1	969800	3	925	80	1
1493700	120	548200	Hastings Central	3005	Hastings Ward	30	Hastings District	06	Hawke's Bay Region	2.83992e+06	6.16605e+06	1	1493700	9	1116	54	3
1494100	15	548200	Hastings Central	3005	Hastings Ward	30	Hastings District	06	Hawke's Bay Region	2.84033e+06	6.16686e+06	1	1494100	9	1108	7	3
969500	45	531002	Te Awamutu Central	1704	Te Awamutu Ward	17	Waipa District	03	Waikato Region	2.7136e+06	6.35277e+06	1	969500	6	984	16	2
969100	57	531001	Te Awamutu West	1704	Te Awamutu Ward	17	Waipa District	03	Waikato Region	2.71259e+06	6.35304e+06	1	969100	7	1028	20	2
1493400	93	548200	Hastings Central	3005	Hastings Ward	30	Hastings District	06	Hawke's Bay Region	2.84021e+06	6.16628e+06	1	1493400	9	1075	42	3
1493502	57	548200	Hastings Central	3005	Hastings Ward	30	Hastings District	06	Hawke's Bay Region	2.84033e+06	6.16632e+06	1	1493502	7	1002	20	2
1366200	141	544300	Te Hapara	2807	Gisborne Ward	28	Gisborne District	05	Gisborne Region	2.94539e+06	6.27179e+06	1	1366200	6	998	49	2
2545300	93	589500	Deans Bush	6004	Riccarton-Wigram Ward	60	Christchurch City	13	Canterbury Region	2.47749e+06	5.74236e+06	1	2545300	3	921	31	1
1497100	240	548000	Mayfair	3005	Hastings Ward	30	Hastings District	06	Hawke's Bay Region	2.84123e+06	6.1671e+06	1	1497100	6	997	84	2
449000	186	515802	Epsom South	704	Hobson Ward	7	Auckland City	02	Auckland Region	2.66839e+06	6.47693e+06	1	449000	5	956	65	2
448800	228	515802	Epsom South	704	Hobson Ward	7	Auckland City	02	Auckland Region	2.66832e+06	6.47709e+06	1	448800	5	969	80	2
1472804	216	548100	Parkvale	3005	Hastings Ward	30	Hastings District	06	Hawke's Bay Region	2.84133e+06	6.16542e+06	1	1472804	4	940	76	2
1497500	96	548000	Mayfair	3005	Hastings Ward	30	Hastings District	06	Hawke's Bay Region	2.84102e+06	6.1671e+06	1	1497500	6	996	34	2
1496600	60	548000	Mayfair	3005	Hastings Ward	30	Hastings District	06	Hawke's Bay Region	2.84126e+06	6.16776e+06	1	1496600	5	964	21	2
449100	300	515802	Epsom South	704	Hobson Ward	7	Auckland City	02	Auckland Region	2.66826e+06	6.47681e+06	1	449100	2	917	99	1
54600	57	501100	Paihia	102	Eastern Ward	1	Far North District	01	Northland Region	2.61046e+06	6.65658e+06	1	54600	4	942	20	2
54801	84	501100	Paihia	102	Eastern Ward	1	Far North District	01	Northland Region	2.61065e+06	6.65617e+06	1	54801	6	979	29	2
54700	87	501100	Paihia	102	Eastern Ward	1	Far North District	01	Northland Region	2.61037e+06	6.6564e+06	1	54700	4	942	30	2
54802	123	501100	Paihia	102	Eastern Ward	1	Far North District	01	Northland Region	2.61063e+06	6.65588e+06	1	54802	7	1002	43	2
1495600	198	548000	Mayfair	3005	Hastings Ward	30	Hastings District	06	Hawke's Bay Region	2.84103e+06	6.16748e+06	1	1495600	4	953	69	2
1496000	66	548000	Mayfair	3005	Hastings Ward	30	Hastings District	06	Hawke's Bay Region	2.84114e+06	6.16753e+06	1	1496000	4	951	23	2
446100	213	515801	Epsom Central	704	Hobson Ward	7	Auckland City	02	Auckland Region	2.66846e+06	6.47819e+06	1	446100	7	1004	75	2
971400	69	531002	Te Awamutu Central	1704	Te Awamutu Ward	17	Waipa District	03	Waikato Region	2.71371e+06	6.35234e+06	1	971400	7	1010	24	2
1494900	54	548200	Hastings Central	3005	Hastings Ward	30	Hastings District	06	Hawke's Bay Region	2.84053e+06	6.16644e+06	1	1494900	4	943	19	2
1494600	27	548200	Hastings Central	3005	Hastings Ward	30	Hastings District	06	Hawke's Bay Region	2.84056e+06	6.16682e+06	1	1494600	8	1046	12	3
1495700	117	548000	Mayfair	3005	Hastings Ward	30	Hastings District	06	Hawke's Bay Region	2.841e+06	6.16733e+06	1	1495700	8	1039	53	3
1495900	117	548000	Mayfair	3005	Hastings Ward	30	Hastings District	06	Hawke's Bay Region	2.84083e+06	6.16728e+06	1	1495900	3	932	39	1
446400	81	515801	Epsom Central	704	Hobson Ward	7	Auckland City	02	Auckland Region	2.66847e+06	6.47782e+06	1	446400	3	932	27	1
447300	231	515801	Epsom Central	704	Hobson Ward	7	Auckland City	02	Auckland Region	2.66836e+06	6.47728e+06	1	447300	5	954	81	2
970200	132	531002	Te Awamutu Central	1704	Te Awamutu Ward	17	Waipa District	03	Waikato Region	2.71411e+06	6.35257e+06	1	970200	9	1126	59	3
1496100	135	548000	Mayfair	3005	Hastings Ward	30	Hastings District	06	Hawke's Bay Region	2.84123e+06	6.16756e+06	1	1496100	6	995	47	2
446600	207	515801	Epsom Central	704	Hobson Ward	7	Auckland City	02	Auckland Region	2.66843e+06	6.47765e+06	1	446600	2	913	68	1
971300	108	531002	Te Awamutu Central	1704	Te Awamutu Ward	17	Waipa District	03	Waikato Region	2.71385e+06	6.35247e+06	1	971300	7	1010	38	2
1494700	33	548200	Hastings Central	3005	Hastings Ward	30	Hastings District	06	Hawke's Bay Region	2.84067e+06	6.16689e+06	1	1494700	8	1046	15	3
53303	75	500900	Kerikeri	102	Eastern Ward	1	Far North District	01	Northland Region	2.59712e+06	6.66338e+06	1	53303	8	1033	34	3
53405	45	500900	Kerikeri	102	Eastern Ward	1	Far North District	01	Northland Region	2.59739e+06	6.66332e+06	1	53405	8	1049	20	3
53407	138	500900	Kerikeri	102	Eastern Ward	1	Far North District	01	Northland Region	2.5976e+06	6.66303e+06	1	53407	8	1037	62	3
53305	120	500900	Kerikeri	102	Eastern Ward	1	Far North District	01	Northland Region	2.59692e+06	6.66315e+06	1	53305	9	1129	54	3
53600	3	500900	Kerikeri	102	Eastern Ward	1	Far North District	01	Northland Region	2.59718e+06	6.66311e+06	1	53600	9	1091	1	3
447100	213	515801	Epsom Central	704	Hobson Ward	7	Auckland City	02	Auckland Region	2.6684e+06	6.47753e+06	1	447100	5	967	75	2
53501	225	500900	Kerikeri	102	Eastern Ward	1	Far North District	01	Northland Region	2.5972e+06	6.66286e+06	1	53501	9	1091	101	3
447200	318	515801	Epsom Central	704	Hobson Ward	7	Auckland City	02	Auckland Region	2.66839e+06	6.4774e+06	1	447200	6	999	111	2
446200	294	515801	Epsom Central	704	Hobson Ward	7	Auckland City	02	Auckland Region	2.66844e+06	6.47808e+06	1	446200	5	955	103	2
1494800	42	548200	Hastings Central	3005	Hastings Ward	30	Hastings District	06	Hawke's Bay Region	2.84044e+06	6.16637e+06	1	1494800	4	943	15	2
53800	123	501100	Paihia	102	Eastern Ward	1	Far North District	01	Northland Region	2.6089e+06	6.65767e+06	1	53800	10	1335	55	3
53700	42	501100	Paihia	102	Eastern Ward	1	Far North District	01	Northland Region	2.6087e+06	6.65751e+06	1	53700	10	1335	19	3
53900	135	501100	Paihia	102	Eastern Ward	1	Far North District	01	Northland Region	2.60914e+06	6.65758e+06	1	53900	10	1154	61	3
54000	87	501100	Paihia	102	Eastern Ward	1	Far North District	01	Northland Region	2.60953e+06	6.65736e+06	1	54000	4	946	30	2
1494500	12	548200	Hastings Central	3005	Hastings Ward	30	Hastings District	06	Hawke's Bay Region	2.84042e+06	6.1667e+06	1	1494500	8	1046	5	3
1490200	75	548200	Hastings Central	3005	Hastings Ward	30	Hastings District	06	Hawke's Bay Region	2.83956e+06	6.16715e+06	1	1490200	8	1051	34	3
1499400	129	548100	Parkvale	3005	Hastings Ward	30	Hastings District	06	Hawke's Bay Region	2.84086e+06	6.16611e+06	1	1499400	6	996	45	2
1499300	63	548100	Parkvale	3005	Hastings Ward	30	Hastings District	06	Hawke's Bay Region	2.84092e+06	6.16593e+06	1	1499300	4	946	22	2
450700	147	517400	Newmarket	704	Hobson Ward	7	Auckland City	02	Auckland Region	2.66911e+06	6.48034e+06	1	450700	8	1044	66	3
2545100	150	589500	Deans Bush	6002	Fendalton-Waimairi Ward	60	Christchurch City	13	Canterbury Region	2.47772e+06	5.74245e+06	1	2545100	3	923	50	1
1497200	135	548000	Mayfair	3005	Hastings Ward	30	Hastings District	06	Hawke's Bay Region	2.84137e+06	6.16731e+06	1	1497200	7	1002	47	2
1496400	108	548000	Mayfair	3005	Hastings Ward	30	Hastings District	06	Hawke's Bay Region	2.84129e+06	6.16801e+06	1	1496400	5	964	38	2
449200	123	515802	Epsom South	704	Hobson Ward	7	Auckland City	02	Auckland Region	2.66823e+06	6.47668e+06	1	449200	7	1002	43	2
2545400	210	589500	Deans Bush	6004	Riccarton-Wigram Ward	60	Christchurch City	13	Canterbury Region	2.47733e+06	5.74219e+06	1	2545400	1	878	69	1
1496500	141	548000	Mayfair	3005	Hastings Ward	30	Hastings District	06	Hawke's Bay Region	2.84139e+06	6.16777e+06	1	1496500	8	1054	63	3
1366300	231	544300	Te Hapara	2807	Gisborne Ward	28	Gisborne District	05	Gisborne Region	2.94566e+06	6.27163e+06	1	1366300	3	930	76	1
1366400	129	544300	Te Hapara	2807	Gisborne Ward	28	Gisborne District	05	Gisborne Region	2.9459e+06	6.27149e+06	1	1366400	8	1049	58	3
1497400	39	548000	Mayfair	3005	Hastings Ward	30	Hastings District	06	Hawke's Bay Region	2.84086e+06	6.16702e+06	1	1497400	8	1046	18	3
1496700	147	548000	Mayfair	3005	Hastings Ward	30	Hastings District	06	Hawke's Bay Region	2.84148e+06	6.16759e+06	1	1496700	6	983	51	2
973400	6	531004	Te Awamutu South	1704	Te Awamutu Ward	17	Waipa District	03	Waikato Region	2.71463e+06	6.35222e+06	1	973400	9	1123	3	3
973000	3	531002	Te Awamutu Central	1704	Te Awamutu Ward	17	Waipa District	03	Waikato Region	2.71409e+06	6.35234e+06	1	973000	9	1123	1	3
1429800	3	546901	Nelson Park	3199	Area Outside Ward	31	Napier City	06	Hawke's Bay Region	2.8467e+06	6.18278e+06	1	1429800	5	961	1	2
1368900	123	544600	Gisborne Central	2807	Gisborne Ward	28	Gisborne District	05	Gisborne Region	2.94617e+06	6.2711e+06	1	1368900	8	1058	55	3
452300	21	515902	Parnell West	704	Hobson Ward	7	Auckland City	02	Auckland Region	2.6687e+06	6.48181e+06	1	452300	4	945	7	2
1499500	69	548100	Parkvale	3005	Hastings Ward	30	Hastings District	06	Hawke's Bay Region	2.84068e+06	6.16624e+06	1	1499500	7	1020	24	2
452400	69	515902	Parnell West	704	Hobson Ward	7	Auckland City	02	Auckland Region	2.66895e+06	6.48168e+06	1	452400	3	930	23	1
452000	258	515902	Parnell West	704	Hobson Ward	7	Auckland City	02	Auckland Region	2.66922e+06	6.48102e+06	1	452000	4	951	90	2
451800	174	515901	Parnell East	704	Hobson Ward	7	Auckland City	02	Auckland Region	2.66932e+06	6.48051e+06	1	451800	6	978	61	2
1369000	144	544600	Gisborne Central	2807	Gisborne Ward	28	Gisborne District	05	Gisborne Region	2.94646e+06	6.27093e+06	1	1369000	8	1066	65	3
451000	123	517400	Newmarket	704	Hobson Ward	7	Auckland City	02	Auckland Region	2.66887e+06	6.48014e+06	1	451000	7	1002	43	2
1500700	48	548100	Parkvale	3005	Hastings Ward	30	Hastings District	06	Hawke's Bay Region	2.84046e+06	6.16614e+06	1	1500700	8	1048	22	3
451600	39	515902	Parnell West	704	Hobson Ward	7	Auckland City	02	Auckland Region	2.66927e+06	6.48072e+06	1	451600	7	1020	14	2
1369200	105	544600	Gisborne Central	2807	Gisborne Ward	28	Gisborne District	05	Gisborne Region	2.94638e+06	6.27084e+06	1	1369200	10	1160	47	3
1369300	132	544600	Gisborne Central	2807	Gisborne Ward	28	Gisborne District	05	Gisborne Region	2.94631e+06	6.27074e+06	1	1369300	8	1061	59	3
1501100	165	548100	Parkvale	3005	Hastings Ward	30	Hastings District	06	Hawke's Bay Region	2.84054e+06	6.16584e+06	1	1501100	5	958	58	2
1500500	48	548100	Parkvale	3005	Hastings Ward	30	Hastings District	06	Hawke's Bay Region	2.84027e+06	6.16601e+06	1	1500500	8	1048	22	3
1761402	108	560411	Oroua Bridge	3901	Kiwitea-Pohangina Ward	39	Manawatu District	08	Manawatu-Wanganui Region	2.73224e+06	6.10808e+06	1	1761402	4	952	38	2
450901	15	517400	Newmarket	704	Hobson Ward	7	Auckland City	02	Auckland Region	2.66906e+06	6.48026e+06	1	450901	3	930	5	1
1366900	141	544300	Te Hapara	2807	Gisborne Ward	28	Gisborne District	05	Gisborne Region	2.94591e+06	6.27123e+06	1	1366900	8	1053	63	3
450902	108	517400	Newmarket	704	Hobson Ward	7	Auckland City	02	Auckland Region	2.66919e+06	6.48018e+06	1	450902	4	945	38	2
450100	69	517400	Newmarket	704	Hobson Ward	7	Auckland City	02	Auckland Region	2.66852e+06	6.48028e+06	1	450100	6	996	24	2
450400	216	517400	Newmarket	704	Hobson Ward	7	Auckland City	02	Auckland Region	2.66876e+06	6.48041e+06	1	450400	3	927	71	1
1499200	63	548100	Parkvale	3005	Hastings Ward	30	Hastings District	06	Hawke's Bay Region	2.84101e+06	6.166e+06	1	1499200	4	946	22	2
450500	84	517400	Newmarket	704	Hobson Ward	7	Auckland City	02	Auckland Region	2.66886e+06	6.48039e+06	1	450500	7	1005	29	2
450800	96	517400	Newmarket	704	Hobson Ward	7	Auckland City	02	Auckland Region	2.66918e+06	6.4804e+06	1	450800	3	930	32	1
453300	69	515902	Parnell West	704	Hobson Ward	7	Auckland City	02	Auckland Region	2.6692e+06	6.48178e+06	1	453300	2	913	23	1
454400	129	515902	Parnell West	704	Hobson Ward	7	Auckland City	02	Auckland Region	2.66931e+06	6.48123e+06	1	454400	2	903	43	1
1372000	15	544600	Gisborne Central	2807	Gisborne Ward	28	Gisborne District	05	Gisborne Region	2.94731e+06	6.26935e+06	1	1372000	9	1079	7	3
1370300	3	544600	Gisborne Central	2807	Gisborne Ward	28	Gisborne District	05	Gisborne Region	2.94659e+06	6.26935e+06	1	1370300	7	1003	1	2
1371500	9	544600	Gisborne Central	2807	Gisborne Ward	28	Gisborne District	05	Gisborne Region	2.94712e+06	6.26947e+06	1	1371500	9	1079	4	3
453102	231	515902	Parnell West	704	Hobson Ward	7	Auckland City	02	Auckland Region	2.66908e+06	6.4819e+06	1	453102	2	913	76	1
1502100	72	548300	Akina	3005	Hastings Ward	30	Hastings District	06	Hawke's Bay Region	2.83997e+06	6.16571e+06	1	1502100	7	1006	25	2
453101	111	515902	Parnell West	704	Hobson Ward	7	Auckland City	02	Auckland Region	2.66906e+06	6.482e+06	1	453101	3	931	37	1
1764700	108	560730	Feilding Central	3903	Feilding Ward	39	Manawatu District	08	Manawatu-Wanganui Region	2.72893e+06	6.1058e+06	1	1764700	5	959	38	2
1765100	207	560720	Feilding West	3903	Feilding Ward	39	Manawatu District	08	Manawatu-Wanganui Region	2.72767e+06	6.10575e+06	1	1765100	5	964	72	2
1501800	153	548300	Akina	3005	Hastings Ward	30	Hastings District	06	Hawke's Bay Region	2.8402e+06	6.16548e+06	1	1501800	7	1018	54	2
1502300	126	548300	Akina	3005	Hastings Ward	30	Hastings District	06	Hawke's Bay Region	2.83976e+06	6.16558e+06	1	1502300	9	1121	57	3
1765201	81	560720	Feilding West	3903	Feilding Ward	39	Manawatu District	08	Manawatu-Wanganui Region	2.72765e+06	6.10557e+06	1	1765201	4	941	28	2
1765202	102	560720	Feilding West	3903	Feilding Ward	39	Manawatu District	08	Manawatu-Wanganui Region	2.72783e+06	6.10555e+06	1	1765202	4	941	36	2
1370600	9	544600	Gisborne Central	2807	Gisborne Ward	28	Gisborne District	05	Gisborne Region	2.94715e+06	6.26985e+06	1	1370600	9	1079	4	3
1502700	138	548300	Akina	3005	Hastings Ward	30	Hastings District	06	Hawke's Bay Region	2.8407e+06	6.16526e+06	1	1502700	7	1006	48	2
1502500	87	548300	Akina	3005	Hastings Ward	30	Hastings District	06	Hawke's Bay Region	2.84041e+06	6.16531e+06	1	1502500	7	1021	30	2
451500	57	515902	Parnell West	704	Hobson Ward	7	Auckland City	02	Auckland Region	2.66929e+06	6.48102e+06	1	451500	1	894	19	1
451900	9	515902	Parnell West	704	Hobson Ward	7	Auckland City	02	Auckland Region	2.66908e+06	6.48055e+06	1	451900	1	894	3	1
1501200	165	548100	Parkvale	3005	Hastings Ward	30	Hastings District	06	Hawke's Bay Region	2.84045e+06	6.16577e+06	1	1501200	8	1048	74	3
1500100	207	548100	Parkvale	3005	Hastings Ward	30	Hastings District	06	Hawke's Bay Region	2.84105e+06	6.16581e+06	1	1500100	7	1015	72	2
452200	141	515902	Parnell West	704	Hobson Ward	7	Auckland City	02	Auckland Region	2.66887e+06	6.48178e+06	1	452200	10	1268	63	3
452500	120	515902	Parnell West	704	Hobson Ward	7	Auckland City	02	Auckland Region	2.66895e+06	6.48162e+06	1	452500	4	944	42	2
1761804	39	560740	Feilding East	3903	Feilding Ward	39	Manawatu District	08	Manawatu-Wanganui Region	2.73026e+06	6.10717e+06	1	1761804	6	987	14	2
1368800	192	544600	Gisborne Central	2807	Gisborne Ward	28	Gisborne District	05	Gisborne Region	2.94645e+06	6.2711e+06	1	1368800	8	1043	86	3
1499600	84	548100	Parkvale	3005	Hastings Ward	30	Hastings District	06	Hawke's Bay Region	2.84078e+06	6.16631e+06	1	1499600	7	1020	29	2
1500400	153	548100	Parkvale	3005	Hastings Ward	30	Hastings District	06	Hawke's Bay Region	2.8411e+06	6.16561e+06	1	1500400	4	948	54	2
1500800	78	548100	Parkvale	3005	Hastings Ward	30	Hastings District	06	Hawke's Bay Region	2.84059e+06	6.16618e+06	1	1500800	7	1004	27	2
452600	33	515902	Parnell West	704	Hobson Ward	7	Auckland City	02	Auckland Region	2.66907e+06	6.48149e+06	1	452600	4	945	12	2
1500300	258	548100	Parkvale	3005	Hastings Ward	30	Hastings District	06	Hawke's Bay Region	2.8409e+06	6.16543e+06	1	1500300	8	1031	116	3
452100	240	515902	Parnell West	704	Hobson Ward	7	Auckland City	02	Auckland Region	2.66929e+06	6.48081e+06	1	452100	7	1020	84	2
1763300	117	560740	Feilding East	3903	Feilding Ward	39	Manawatu District	08	Manawatu-Wanganui Region	2.72943e+06	6.10617e+06	1	1763300	7	1011	41	2
1763400	96	560740	Feilding East	3903	Feilding Ward	39	Manawatu District	08	Manawatu-Wanganui Region	2.72958e+06	6.10631e+06	1	1763400	7	1011	34	2
452700	78	515902	Parnell West	704	Hobson Ward	7	Auckland City	02	Auckland Region	2.669e+06	6.48148e+06	1	452700	4	945	27	2
451700	72	515902	Parnell West	704	Hobson Ward	7	Auckland City	02	Auckland Region	2.66918e+06	6.48064e+06	1	451700	1	894	24	1
451300	9	517400	Newmarket	704	Hobson Ward	7	Auckland City	02	Auckland Region	2.66881e+06	6.47979e+06	1	451300	7	1002	3	2
1372200	165	544600	Gisborne Central	2807	Gisborne Ward	28	Gisborne District	05	Gisborne Region	2.94714e+06	6.27027e+06	1	1372200	10	1195	74	3
1503400	81	548300	Akina	3005	Hastings Ward	30	Hastings District	06	Hawke's Bay Region	2.83957e+06	6.16573e+06	1	1503400	8	1053	36	3
1765500	27	560720	Feilding West	3903	Feilding Ward	39	Manawatu District	08	Manawatu-Wanganui Region	2.72825e+06	6.1059e+06	1	1765500	10	1243	12	3
1765300	105	560720	Feilding West	3903	Feilding Ward	39	Manawatu District	08	Manawatu-Wanganui Region	2.72797e+06	6.10586e+06	1	1765300	8	1045	47	3
1372400	3	544600	Gisborne Central	2807	Gisborne Ward	28	Gisborne District	05	Gisborne Region	2.94695e+06	6.27007e+06	1	1372400	8	1052	1	3
1372300	3	544600	Gisborne Central	2807	Gisborne Ward	28	Gisborne District	05	Gisborne Region	2.9472e+06	6.27009e+06	1	1372300	10	1195	1	3
1765700	6	560720	Feilding West	3903	Feilding Ward	39	Manawatu District	08	Manawatu-Wanganui Region	2.72809e+06	6.10568e+06	1	1765700	8	1045	3	3
1372500	6	544600	Gisborne Central	2807	Gisborne Ward	28	Gisborne District	05	Gisborne Region	2.94704e+06	6.26994e+06	1	1372500	7	1029	2	2
1373300	102	544600	Gisborne Central	2807	Gisborne Ward	28	Gisborne District	05	Gisborne Region	2.9467e+06	6.27076e+06	1	1373300	9	1136	46	3
1503200	210	548300	Akina	3005	Hastings Ward	30	Hastings District	06	Hawke's Bay Region	2.83936e+06	6.16573e+06	1	1503200	7	1024	74	2
1370800	3	544600	Gisborne Central	2807	Gisborne Ward	28	Gisborne District	05	Gisborne Region	2.94692e+06	6.26964e+06	1	1370800	9	1079	1	3
1371100	6	544600	Gisborne Central	2807	Gisborne Ward	28	Gisborne District	05	Gisborne Region	2.94716e+06	6.26969e+06	1	1371100	9	1079	3	3
1371300	6	544600	Gisborne Central	2807	Gisborne Ward	28	Gisborne District	05	Gisborne Region	2.94731e+06	6.26968e+06	1	1371300	9	1079	3	3
1371700	3	544600	Gisborne Central	2807	Gisborne Ward	28	Gisborne District	05	Gisborne Region	2.94739e+06	6.26958e+06	1	1371700	9	1079	1	3
1502900	93	548300	Akina	3005	Hastings Ward	30	Hastings District	06	Hawke's Bay Region	2.84028e+06	6.16495e+06	1	1502900	9	1132	42	3
1501500	87	548300	Akina	3005	Hastings Ward	30	Hastings District	06	Hawke's Bay Region	2.84013e+06	6.1659e+06	1	1501500	7	1006	30	2
1501300	96	548100	Parkvale	3005	Hastings Ward	30	Hastings District	06	Hawke's Bay Region	2.84079e+06	6.16582e+06	1	1501300	4	947	34	2
454300	174	515902	Parnell West	704	Hobson Ward	7	Auckland City	02	Auckland Region	2.66928e+06	6.48149e+06	1	454300	3	927	57	1
453700	135	515902	Parnell West	704	Hobson Ward	7	Auckland City	02	Auckland Region	2.66924e+06	6.48166e+06	1	453700	6	977	47	2
1764800	90	560730	Feilding Central	3903	Feilding Ward	39	Manawatu District	08	Manawatu-Wanganui Region	2.72879e+06	6.10593e+06	1	1764800	7	1013	31	2
1430100	33	546901	Nelson Park	3199	Area Outside Ward	31	Napier City	06	Hawke's Bay Region	2.84672e+06	6.18256e+06	1	1430100	9	1083	15	3
1502200	75	548300	Akina	3005	Hastings Ward	30	Hastings District	06	Hawke's Bay Region	2.8399e+06	6.16564e+06	1	1502200	9	1121	34	3
1502000	162	548300	Akina	3005	Hastings Ward	30	Hastings District	06	Hawke's Bay Region	2.8404e+06	6.16564e+06	1	1502000	8	1070	73	3
1501900	153	548300	Akina	3005	Hastings Ward	30	Hastings District	06	Hawke's Bay Region	2.8403e+06	6.16556e+06	1	1501900	8	1065	69	3
1501400	177	548100	Parkvale	3005	Hastings Ward	30	Hastings District	06	Hawke's Bay Region	2.84076e+06	6.16558e+06	1	1501400	7	1018	62	2
1764900	78	560730	Feilding Central	3903	Feilding Ward	39	Manawatu District	08	Manawatu-Wanganui Region	2.72878e+06	6.10572e+06	1	1764900	7	1013	27	2
1370500	33	544600	Gisborne Central	2807	Gisborne Ward	28	Gisborne District	05	Gisborne Region	2.9473e+06	6.26996e+06	1	1370500	9	1079	15	3
453800	54	515902	Parnell West	704	Hobson Ward	7	Auckland City	02	Auckland Region	2.66916e+06	6.48144e+06	1	453800	6	977	19	2
1502600	117	548300	Akina	3005	Hastings Ward	30	Hastings District	06	Hawke's Bay Region	2.84058e+06	6.16542e+06	1	1502600	8	1050	53	3
453400	57	515902	Parnell West	704	Hobson Ward	7	Auckland City	02	Auckland Region	2.66909e+06	6.48178e+06	1	453400	3	924	19	1
1371000	6	544600	Gisborne Central	2807	Gisborne Ward	28	Gisborne District	05	Gisborne Region	2.94723e+06	6.26975e+06	1	1371000	9	1079	3	3
453500	9	515902	Parnell West	704	Hobson Ward	7	Auckland City	02	Auckland Region	2.66904e+06	6.48175e+06	1	453500	3	924	3	1
452900	129	515902	Parnell West	704	Hobson Ward	7	Auckland City	02	Auckland Region	2.66911e+06	6.48122e+06	1	452900	4	939	45	2
1502800	183	548300	Akina	3005	Hastings Ward	30	Hastings District	06	Hawke's Bay Region	2.84048e+06	6.16509e+06	1	1502800	8	1042	82	3
453600	111	515902	Parnell West	704	Hobson Ward	7	Auckland City	02	Auckland Region	2.66914e+06	6.48164e+06	1	453600	3	924	37	1
452800	42	515902	Parnell West	704	Hobson Ward	7	Auckland City	02	Auckland Region	2.66914e+06	6.48131e+06	1	452800	4	939	15	2
453103	111	515902	Parnell West	704	Hobson Ward	7	Auckland City	02	Auckland Region	2.66924e+06	6.48191e+06	1	453103	2	912	37	1
1371400	30	544600	Gisborne Central	2807	Gisborne Ward	28	Gisborne District	05	Gisborne Region	2.94723e+06	6.26958e+06	1	1371400	9	1079	14	3
453000	156	515902	Parnell West	704	Hobson Ward	7	Auckland City	02	Auckland Region	2.66896e+06	6.48196e+06	1	453000	2	913	51	1
1501600	156	548300	Akina	3005	Hastings Ward	30	Hastings District	06	Hawke's Bay Region	2.84014e+06	6.16579e+06	1	1501600	6	990	55	2
458000	111	515700	Epsom North	704	Hobson Ward	7	Auckland City	02	Auckland Region	2.66844e+06	6.47853e+06	1	458000	8	1068	50	3
1373600	87	544600	Gisborne Central	2807	Gisborne Ward	28	Gisborne District	05	Gisborne Region	2.94659e+06	6.27066e+06	1	1373600	10	1178	39	3
1373400	117	544600	Gisborne Central	2807	Gisborne Ward	28	Gisborne District	05	Gisborne Region	2.9468e+06	6.27056e+06	1	1373400	6	994	41	2
1372100	39	544600	Gisborne Central	2807	Gisborne Ward	28	Gisborne District	05	Gisborne Region	2.94718e+06	6.26917e+06	1	1372100	9	1079	18	3
1503300	87	548300	Akina	3005	Hastings Ward	30	Hastings District	06	Hawke's Bay Region	2.83949e+06	6.16568e+06	1	1503300	8	1053	39	3
1503100	174	548300	Akina	3005	Hastings Ward	30	Hastings District	06	Hawke's Bay Region	2.83953e+06	6.16602e+06	1	1503100	10	1214	78	3
1765600	9	560720	Feilding West	3903	Feilding Ward	39	Manawatu District	08	Manawatu-Wanganui Region	2.72825e+06	6.10578e+06	1	1765600	7	1006	3	2
1503700	84	548300	Akina	3005	Hastings Ward	30	Hastings District	06	Hawke's Bay Region	2.83974e+06	6.16547e+06	1	1503700	6	984	29	2
1765800	3	560720	Feilding West	3903	Feilding Ward	39	Manawatu District	08	Manawatu-Wanganui Region	2.72817e+06	6.10556e+06	1	1765800	8	1045	1	3
1766100	75	560720	Feilding West	3903	Feilding Ward	39	Manawatu District	08	Manawatu-Wanganui Region	2.72803e+06	6.10539e+06	1	1766100	10	1243	34	3
1373700	15	544600	Gisborne Central	2807	Gisborne Ward	28	Gisborne District	05	Gisborne Region	2.9466e+06	6.27045e+06	1	1373700	10	1269	7	3
1373500	108	544600	Gisborne Central	2807	Gisborne Ward	28	Gisborne District	05	Gisborne Region	2.94706e+06	6.27049e+06	1	1373500	9	1088	49	3
1503500	102	548300	Akina	3005	Hastings Ward	30	Hastings District	06	Hawke's Bay Region	2.83966e+06	6.16579e+06	1	1503500	6	984	36	2
491000	84	516001	Mt Hobson	704	Hobson Ward	7	Auckland City	02	Auckland Region	2.66924e+06	6.47915e+06	1	491000	6	989	29	2
458100	129	515700	Epsom North	704	Hobson Ward	7	Auckland City	02	Auckland Region	2.6686e+06	6.47849e+06	1	458100	5	971	45	2
2294900	6	581230	Blenheim Central	5304	Blenheim Ward	53	Marlborough District	18	Marlborough Region	2.59002e+06	5.9661e+06	1	2294900	7	1023	2	2
1376602	321	544900	Riverdale	2807	Gisborne Ward	28	Gisborne District	05	Gisborne Region	2.94444e+06	6.27217e+06	1	1376602	7	999	112	2
1373900	18	544600	Gisborne Central	2807	Gisborne Ward	28	Gisborne District	05	Gisborne Region	2.9468e+06	6.27028e+06	1	1373900	10	1269	8	3
1373800	144	544600	Gisborne Central	2807	Gisborne Ward	28	Gisborne District	05	Gisborne Region	2.94693e+06	6.27038e+06	1	1373800	10	1269	65	3
457700	105	515700	Epsom North	704	Hobson Ward	7	Auckland City	02	Auckland Region	2.66858e+06	6.4789e+06	1	457700	7	1011	37	2
457800	219	515700	Epsom North	704	Hobson Ward	7	Auckland City	02	Auckland Region	2.66858e+06	6.47876e+06	1	457800	7	999	77	2
457600	96	515700	Epsom North	704	Hobson Ward	7	Auckland City	02	Auckland Region	2.66833e+06	6.47897e+06	1	457600	7	1011	34	2
457900	192	515700	Epsom North	704	Hobson Ward	7	Auckland City	02	Auckland Region	2.66855e+06	6.47865e+06	1	457900	5	969	67	2
1377900	120	544200	Mangapapa	2807	Gisborne Ward	28	Gisborne District	05	Gisborne Region	2.9459e+06	6.27186e+06	1	1377900	10	1384	54	3
1377702	129	544200	Mangapapa	2807	Gisborne Ward	28	Gisborne District	05	Gisborne Region	2.94606e+06	6.27182e+06	1	1377702	10	1191	58	3
1771100	81	560710	Feilding North	3903	Feilding Ward	39	Manawatu District	08	Manawatu-Wanganui Region	2.72978e+06	6.10677e+06	1	1771100	8	1070	36	3
1772000	66	560730	Feilding Central	3903	Feilding Ward	39	Manawatu District	08	Manawatu-Wanganui Region	2.7291e+06	6.10651e+06	1	1772000	9	1137	30	3
1771200	129	560730	Feilding Central	3903	Feilding Ward	39	Manawatu District	08	Manawatu-Wanganui Region	2.72951e+06	6.10652e+06	1	1771200	7	1010	45	2
1771400	102	560740	Feilding East	3903	Feilding Ward	39	Manawatu District	08	Manawatu-Wanganui Region	2.72976e+06	6.10649e+06	1	1771400	9	1114	46	3
1379202	102	544200	Mangapapa	2807	Gisborne Ward	28	Gisborne District	05	Gisborne Region	2.9471e+06	6.27146e+06	1	1379202	5	957	36	2
2295000	6	581230	Blenheim Central	5304	Blenheim Ward	53	Marlborough District	18	Marlborough Region	2.59007e+06	5.96582e+06	1	2295000	7	1023	2	2
2296300	258	581230	Blenheim Central	5304	Blenheim Ward	53	Marlborough District	18	Marlborough Region	2.59044e+06	5.96587e+06	1	2296300	5	960	90	2
1378800	120	544200	Mangapapa	2807	Gisborne Ward	28	Gisborne District	05	Gisborne Region	2.94703e+06	6.27136e+06	1	1378800	8	1042	54	3
1768900	81	560730	Feilding Central	3903	Feilding Ward	39	Manawatu District	08	Manawatu-Wanganui Region	2.72844e+06	6.10618e+06	1	1768900	8	1033	36	3
458200	261	515700	Epsom North	704	Hobson Ward	7	Auckland City	02	Auckland Region	2.66849e+06	6.47839e+06	1	458200	5	962	91	2
2294800	18	581230	Blenheim Central	5304	Blenheim Ward	53	Marlborough District	18	Marlborough Region	2.58988e+06	5.9661e+06	1	2294800	7	1023	6	2
1376100	159	544900	Riverdale	2807	Gisborne Ward	28	Gisborne District	05	Gisborne Region	2.94547e+06	6.27232e+06	1	1376100	4	942	56	2
1376000	60	544900	Riverdale	2807	Gisborne Ward	28	Gisborne District	05	Gisborne Region	2.94544e+06	6.27216e+06	1	1376000	6	984	21	2
1380600	186	544500	Whataupoko	2807	Gisborne Ward	28	Gisborne District	05	Gisborne Region	2.94764e+06	6.27037e+06	1	1380600	7	1023	65	2
1379300	114	544200	Mangapapa	2807	Gisborne Ward	28	Gisborne District	05	Gisborne Region	2.94685e+06	6.27117e+06	1	1379300	4	944	40	2
70201	24	502003	Te Hihi	201	Mangakahia-Maungatapere Ward	2	Whangarei District	01	Northland Region	2.62554e+06	6.60574e+06	1	70201	2	901	8	1
1772600	51	560740	Feilding East	3903	Feilding Ward	39	Manawatu District	08	Manawatu-Wanganui Region	2.72914e+06	6.1059e+06	1	1772600	9	1134	23	3
1380700	150	544500	Whataupoko	2807	Gisborne Ward	28	Gisborne District	05	Gisborne Region	2.94761e+06	6.27018e+06	1	1380700	9	1088	68	3
1379400	135	544500	Whataupoko	2807	Gisborne Ward	28	Gisborne District	05	Gisborne Region	2.94751e+06	6.27089e+06	1	1379400	9	1080	61	3
2297500	42	581230	Blenheim Central	5304	Blenheim Ward	53	Marlborough District	18	Marlborough Region	2.58949e+06	5.96583e+06	1	2297500	7	1023	15	2
1380500	189	544500	Whataupoko	2807	Gisborne Ward	28	Gisborne District	05	Gisborne Region	2.94757e+06	6.27055e+06	1	1380500	7	1004	66	2
1380200	147	544500	Whataupoko	2807	Gisborne Ward	28	Gisborne District	05	Gisborne Region	2.94741e+06	6.27068e+06	1	1380200	7	1011	51	2
1771302	150	560740	Feilding East	3903	Feilding Ward	39	Manawatu District	08	Manawatu-Wanganui Region	2.73048e+06	6.10709e+06	1	1771302	4	937	52	2
1772500	186	560740	Feilding East	3903	Feilding Ward	39	Manawatu District	08	Manawatu-Wanganui Region	2.72913e+06	6.1061e+06	1	1772500	4	948	65	2
1771601	195	560740	Feilding East	3903	Feilding Ward	39	Manawatu District	08	Manawatu-Wanganui Region	2.73046e+06	6.1069e+06	1	1771601	3	927	64	1
1772200	66	560730	Feilding Central	3903	Feilding Ward	39	Manawatu District	08	Manawatu-Wanganui Region	2.72881e+06	6.10608e+06	1	1772200	9	1074	30	3
1377800	129	544200	Mangapapa	2807	Gisborne Ward	28	Gisborne District	05	Gisborne Region	2.94586e+06	6.27201e+06	1	1377800	10	1331	58	3
1772100	135	560730	Feilding Central	3903	Feilding Ward	39	Manawatu District	08	Manawatu-Wanganui Region	2.72854e+06	6.10601e+06	1	1772100	9	1075	61	3
1770800	120	560710	Feilding North	3903	Feilding Ward	39	Manawatu District	08	Manawatu-Wanganui Region	2.72958e+06	6.10685e+06	1	1770800	10	1277	54	3
1771301	204	560740	Feilding East	3903	Feilding Ward	39	Manawatu District	08	Manawatu-Wanganui Region	2.73008e+06	6.10686e+06	1	1771301	3	924	67	1
1378900	99	544200	Mangapapa	2807	Gisborne Ward	28	Gisborne District	05	Gisborne Region	2.94691e+06	6.27169e+06	1	1378900	8	1056	45	3
1378500	114	544200	Mangapapa	2807	Gisborne Ward	28	Gisborne District	05	Gisborne Region	2.94616e+06	6.27167e+06	1	1378500	10	1141	51	3
1771500	126	560740	Feilding East	3903	Feilding Ward	39	Manawatu District	08	Manawatu-Wanganui Region	2.72999e+06	6.10661e+06	1	1771500	8	1072	57	3
1771700	117	560730	Feilding Central	3903	Feilding Ward	39	Manawatu District	08	Manawatu-Wanganui Region	2.7293e+06	6.10668e+06	1	1771700	9	1074	53	3
1771602	21	560740	Feilding East	3903	Feilding Ward	39	Manawatu District	08	Manawatu-Wanganui Region	2.73015e+06	6.10667e+06	1	1771602	3	927	7	1
1378400	135	544200	Mangapapa	2807	Gisborne Ward	28	Gisborne District	05	Gisborne Region	2.94639e+06	6.27157e+06	1	1378400	7	1006	47	2
1378200	117	544200	Mangapapa	2807	Gisborne Ward	28	Gisborne District	05	Gisborne Region	2.94668e+06	6.2716e+06	1	1378200	9	1129	53	3
1772400	165	560730	Feilding Central	3903	Feilding Ward	39	Manawatu District	08	Manawatu-Wanganui Region	2.72919e+06	6.10636e+06	1	1772400	8	1032	74	3
1771303	138	560740	Feilding East	3903	Feilding Ward	39	Manawatu District	08	Manawatu-Wanganui Region	2.73082e+06	6.10736e+06	1	1771303	1	896	46	1
1772300	132	560730	Feilding Central	3903	Feilding Ward	39	Manawatu District	08	Manawatu-Wanganui Region	2.72897e+06	6.10623e+06	1	1772300	5	969	46	2
1378700	135	544200	Mangapapa	2807	Gisborne Ward	28	Gisborne District	05	Gisborne Region	2.94692e+06	6.27128e+06	1	1378700	8	1055	61	3
1770900	105	560710	Feilding North	3903	Feilding Ward	39	Manawatu District	08	Manawatu-Wanganui Region	2.72969e+06	6.10693e+06	1	1770900	9	1114	47	3
1771000	78	560710	Feilding North	3903	Feilding Ward	39	Manawatu District	08	Manawatu-Wanganui Region	2.72984e+06	6.10696e+06	1	1771000	8	1070	35	3
2299500	3	581230	Blenheim Central	5304	Blenheim Ward	53	Marlborough District	18	Marlborough Region	2.59005e+06	5.96556e+06	1	2299500	7	1012	1	2
2299300	15	581230	Blenheim Central	5304	Blenheim Ward	53	Marlborough District	18	Marlborough Region	2.58992e+06	5.96563e+06	1	2299300	7	1012	5	2
2298900	6	581230	Blenheim Central	5304	Blenheim Ward	53	Marlborough District	18	Marlborough Region	2.58974e+06	5.9655e+06	1	2298900	7	1005	2	2
2298700	12	581230	Blenheim Central	5304	Blenheim Ward	53	Marlborough District	18	Marlborough Region	2.58962e+06	5.96563e+06	1	2298700	7	1005	4	2
2299400	6	581230	Blenheim Central	5304	Blenheim Ward	53	Marlborough District	18	Marlborough Region	2.58989e+06	5.96555e+06	1	2299400	7	1012	2	2
2297100	84	581230	Blenheim Central	5304	Blenheim Ward	53	Marlborough District	18	Marlborough Region	2.58893e+06	5.96577e+06	1	2297100	8	1037	38	3
1379800	186	544500	Whataupoko	2807	Gisborne Ward	28	Gisborne District	05	Gisborne Region	2.94741e+06	6.27121e+06	1	1379800	6	998	65	2
2298400	129	581230	Blenheim Central	5304	Blenheim Ward	53	Marlborough District	18	Marlborough Region	2.58939e+06	5.96561e+06	1	2298400	7	1027	45	2
2298201	159	581230	Blenheim Central	5304	Blenheim Ward	53	Marlborough District	18	Marlborough Region	2.58916e+06	5.96556e+06	1	2298201	9	1087	72	3
2297900	171	581230	Blenheim Central	5304	Blenheim Ward	53	Marlborough District	18	Marlborough Region	2.58897e+06	5.96557e+06	1	2297900	6	987	60	2
1380400	162	544500	Whataupoko	2807	Gisborne Ward	28	Gisborne District	05	Gisborne Region	2.94715e+06	6.27104e+06	1	1380400	7	1025	57	2
1380900	90	544500	Whataupoko	2807	Gisborne Ward	28	Gisborne District	05	Gisborne Region	2.94771e+06	6.26997e+06	1	1380900	5	964	31	2
1380800	72	544500	Whataupoko	2807	Gisborne Ward	28	Gisborne District	05	Gisborne Region	2.94759e+06	6.2699e+06	1	1380800	5	964	25	2
1380300	144	544500	Whataupoko	2807	Gisborne Ward	28	Gisborne District	05	Gisborne Region	2.94727e+06	6.27086e+06	1	1380300	5	969	50	2
2297200	150	581230	Blenheim Central	5304	Blenheim Ward	53	Marlborough District	18	Marlborough Region	2.58911e+06	5.96608e+06	1	2297200	8	1055	68	3
2297300	204	581230	Blenheim Central	5304	Blenheim Ward	53	Marlborough District	18	Marlborough Region	2.58925e+06	5.96581e+06	1	2297300	8	1068	92	3
2297600	15	581230	Blenheim Central	5304	Blenheim Ward	53	Marlborough District	18	Marlborough Region	2.58962e+06	5.96596e+06	1	2297600	7	1023	5	2
2297700	15	581230	Blenheim Central	5304	Blenheim Ward	53	Marlborough District	18	Marlborough Region	2.58974e+06	5.96575e+06	1	2297700	7	1023	5	2
2299600	18	581230	Blenheim Central	5304	Blenheim Ward	53	Marlborough District	18	Marlborough Region	2.59038e+06	5.96555e+06	1	2299600	7	1012	6	2
1382200	267	544701	Kaiti North	2807	Gisborne Ward	28	Gisborne District	05	Gisborne Region	2.94793e+06	6.26972e+06	1	1382200	4	937	93	2
1122600	15	535241	Karapiro	1703	Maungatautari Ward	17	Waipa District	03	Waikato Region	2.72928e+06	6.36456e+06	1	1122600	1	896	5	1
862800	78	529900	Claudelands	1603	South Ward	16	Hamilton City	03	Waikato Region	2.71132e+06	6.37759e+06	1	862800	6	998	27	2
862900	78	529900	Claudelands	1603	South Ward	16	Hamilton City	03	Waikato Region	2.7114e+06	6.37761e+06	1	862900	6	976	27	2
863900	18	529900	Claudelands	1603	South Ward	16	Hamilton City	03	Waikato Region	2.71107e+06	6.378e+06	1	863900	4	943	6	2
862502	114	529900	Claudelands	1603	South Ward	16	Hamilton City	03	Waikato Region	2.71145e+06	6.37791e+06	1	862502	7	1026	40	2
863700	132	529900	Claudelands	1602	East Ward	16	Hamilton City	03	Waikato Region	2.71105e+06	6.37836e+06	1	863700	8	1069	59	3
862700	96	529900	Claudelands	1603	South Ward	16	Hamilton City	03	Waikato Region	2.71122e+06	6.37778e+06	1	862700	6	998	34	2
1503900	159	548300	Akina	3005	Hastings Ward	30	Hastings District	06	Hawke's Bay Region	2.83957e+06	6.1654e+06	1	1503900	8	1059	72	3
74700	186	502005	Otaika-Portland	205	Okara Ward	2	Whangarei District	01	Northland Region	2.6295e+06	6.60332e+06	1	74700	6	977	65	2
864200	288	529900	Claudelands	1603	South Ward	16	Hamilton City	03	Waikato Region	2.71136e+06	6.37809e+06	1	864200	9	1115	130	3
863200	105	529900	Claudelands	1603	South Ward	16	Hamilton City	03	Waikato Region	2.71156e+06	6.37751e+06	1	863200	10	1172	47	3
863800	99	529900	Claudelands	1602	East Ward	16	Hamilton City	03	Waikato Region	2.71088e+06	6.37836e+06	1	863800	4	943	35	2
863600	159	529900	Claudelands	1602	East Ward	16	Hamilton City	03	Waikato Region	2.71128e+06	6.37845e+06	1	863600	6	994	56	2
862600	111	529900	Claudelands	1603	South Ward	16	Hamilton City	03	Waikato Region	2.71133e+06	6.37788e+06	1	862600	6	976	39	2
863000	213	529900	Claudelands	1603	South Ward	16	Hamilton City	03	Waikato Region	2.71159e+06	6.37771e+06	1	863000	6	990	75	2
1495200	126	548200	Hastings Central	3005	Hastings Ward	30	Hastings District	06	Hawke's Bay Region	2.84083e+06	6.16668e+06	1	1495200	8	1031	57	3
2831102	21	600813	Cape Wanbrow	6802	Oamaru Ward	68	Waitaki District	14	Otago Region	2.35042e+06	5.56369e+06	1	2831102	1	894	7	1
864000	138	529900	Claudelands	1603	South Ward	16	Hamilton City	03	Waikato Region	2.71106e+06	6.37814e+06	1	864000	3	932	46	1
864100	231	529900	Claudelands	1603	South Ward	16	Hamilton City	03	Waikato Region	2.71132e+06	6.37823e+06	1	864100	9	1113	104	3
868200	153	529600	Chartwell	1602	East Ward	16	Hamilton City	03	Waikato Region	2.71058e+06	6.3785e+06	1	868200	1	895	50	1
868400	108	529600	Chartwell	1602	East Ward	16	Hamilton City	03	Waikato Region	2.70983e+06	6.38004e+06	1	868400	5	956	38	2
868000	183	529600	Chartwell	1602	East Ward	16	Hamilton City	03	Waikato Region	2.71047e+06	6.3788e+06	1	868000	1	884	60	1
2441500	75	585802	Amberley	5804	Amberley Ward	58	Hurunui District	13	Canterbury Region	2.48846e+06	5.78428e+06	1	2441500	7	1003	26	2
2441400	210	585802	Amberley	5804	Amberley Ward	58	Hurunui District	13	Canterbury Region	2.48821e+06	5.78436e+06	1	2441400	5	964	74	2
2441701	42	585802	Amberley	5804	Amberley Ward	58	Hurunui District	13	Canterbury Region	2.48793e+06	5.78375e+06	1	2441701	8	1072	19	3
2439305	120	585803	Leithfield	5804	Amberley Ward	58	Hurunui District	13	Canterbury Region	2.48907e+06	5.77942e+06	1	2439305	3	922	40	1
870200	138	529800	Clarkin	1602	East Ward	16	Hamilton City	03	Waikato Region	2.71119e+06	6.37863e+06	1	870200	8	1039	62	3
2443500	27	586306	Rangiora North	5903	Rangiora Ward	59	Waimakariri District	13	Canterbury Region	2.47685e+06	5.76709e+06	1	2443500	8	1044	12	3
2443600	27	586306	Rangiora North	5903	Rangiora Ward	59	Waimakariri District	13	Canterbury Region	2.47705e+06	5.76711e+06	1	2443600	8	1044	12	3
2443400	87	586306	Rangiora North	5903	Rangiora Ward	59	Waimakariri District	13	Canterbury Region	2.4767e+06	5.76705e+06	1	2443400	6	993	30	2
869900	84	529800	Clarkin	1602	East Ward	16	Hamilton City	03	Waikato Region	2.71087e+06	6.37895e+06	1	869900	9	1093	38	3
870100	147	529800	Clarkin	1602	East Ward	16	Hamilton City	03	Waikato Region	2.71108e+06	6.37877e+06	1	870100	7	1023	51	2
869500	108	529800	Clarkin	1602	East Ward	16	Hamilton City	03	Waikato Region	2.71076e+06	6.37929e+06	1	869500	7	1002	38	2
2442500	228	586306	Rangiora North	5903	Rangiora Ward	59	Waimakariri District	13	Canterbury Region	2.47637e+06	5.7674e+06	1	2442500	5	973	80	2
2443100	189	586306	Rangiora North	5903	Rangiora Ward	59	Waimakariri District	13	Canterbury Region	2.47676e+06	5.76747e+06	1	2443100	5	962	66	2
2443000	201	586306	Rangiora North	5903	Rangiora Ward	59	Waimakariri District	13	Canterbury Region	2.47655e+06	5.7676e+06	1	2443000	7	1023	70	2
869200	114	529600	Chartwell	1602	East Ward	16	Hamilton City	03	Waikato Region	2.71031e+06	6.3795e+06	1	869200	2	910	38	1
2441000	105	585803	Leithfield	5804	Amberley Ward	58	Hurunui District	13	Canterbury Region	2.48848e+06	5.78118e+06	1	2441000	2	914	35	1
2441901	87	585802	Amberley	5804	Amberley Ward	58	Hurunui District	13	Canterbury Region	2.48801e+06	5.78276e+06	1	2441901	4	952	30	2
2442002	39	585802	Amberley	5804	Amberley Ward	58	Hurunui District	13	Canterbury Region	2.48855e+06	5.78306e+06	1	2442002	4	952	14	2
2442001	147	585802	Amberley	5804	Amberley Ward	58	Hurunui District	13	Canterbury Region	2.4882e+06	5.78318e+06	1	2442001	8	1033	66	3
868600	90	529600	Chartwell	1602	East Ward	16	Hamilton City	03	Waikato Region	2.70989e+06	6.3799e+06	1	868600	2	918	30	1
868501	171	529600	Chartwell	1602	East Ward	16	Hamilton City	03	Waikato Region	2.71004e+06	6.38029e+06	1	868501	1	895	56	1
868900	45	529600	Chartwell	1602	East Ward	16	Hamilton City	03	Waikato Region	2.71009e+06	6.37978e+06	1	868900	5	956	16	2
868502	135	529600	Chartwell	1602	East Ward	16	Hamilton City	03	Waikato Region	2.71021e+06	6.38023e+06	1	868502	2	912	45	1
868100	231	529600	Chartwell	1602	East Ward	16	Hamilton City	03	Waikato Region	2.71076e+06	6.37862e+06	1	868100	5	966	81	2
867900	165	529600	Chartwell	1602	East Ward	16	Hamilton City	03	Waikato Region	2.71042e+06	6.37917e+06	1	867900	1	891	54	1
868300	87	529600	Chartwell	1602	East Ward	16	Hamilton City	03	Waikato Region	2.71066e+06	6.37919e+06	1	868300	9	1098	39	3
2441703	69	585802	Amberley	5804	Amberley Ward	58	Hurunui District	13	Canterbury Region	2.48798e+06	5.78342e+06	1	2441703	8	1072	31	3
2441702	57	585802	Amberley	5804	Amberley Ward	58	Hurunui District	13	Canterbury Region	2.48776e+06	5.78361e+06	1	2441702	8	1072	26	3
2441605	72	585802	Amberley	5804	Amberley Ward	58	Hurunui District	13	Canterbury Region	2.48784e+06	5.78319e+06	1	2441605	7	1010	25	2
868800	48	529600	Chartwell	1602	East Ward	16	Hamilton City	03	Waikato Region	2.71045e+06	6.38017e+06	1	868800	2	911	16	1
868700	174	529600	Chartwell	1602	East Ward	16	Hamilton City	03	Waikato Region	2.71013e+06	6.38e+06	1	868700	3	934	57	1
85200	102	502102	Kamo East	204	Denby Ward	2	Whangarei District	01	Northland Region	2.62913e+06	6.61162e+06	1	85200	1	898	34	1
1587100	282	551400	Moturoa	3301	New Plymouth City Ward	33	New Plymouth District	07	Taranaki Region	2.60122e+06	6.23784e+06	1	1587100	5	964	99	2
85503	36	502101	Kamo West	204	Denby Ward	2	Whangarei District	01	Northland Region	2.62865e+06	6.61159e+06	1	85503	8	1063	16	3
2707100	201	596400	Lyttelton	6007	Banks Peninsula Ward	60	Christchurch City	13	Canterbury Region	2.48795e+06	5.73383e+06	1	2707100	4	947	70	2
2838300	87	601030	Oamaru Central	6802	Oamaru Ward	68	Waitaki District	14	Otago Region	2.34935e+06	5.5653e+06	1	2838300	5	971	30	2
2838700	84	601030	Oamaru Central	6802	Oamaru Ward	68	Waitaki District	14	Otago Region	2.34988e+06	5.56526e+06	1	2838700	7	1020	29	2
2445101	150	586302	Rangiora West	5903	Rangiora Ward	59	Waimakariri District	13	Canterbury Region	2.47693e+06	5.76657e+06	1	2445101	8	1051	68	3
2445102	75	586302	Rangiora West	5903	Rangiora Ward	59	Waimakariri District	13	Canterbury Region	2.47703e+06	5.76665e+06	1	2445102	8	1051	34	3
2445200	90	586303	Rangiora East	5903	Rangiora Ward	59	Waimakariri District	13	Canterbury Region	2.47712e+06	5.76663e+06	1	2445200	6	979	31	2
2444900	168	586302	Rangiora West	5903	Rangiora Ward	59	Waimakariri District	13	Canterbury Region	2.47666e+06	5.76634e+06	1	2444900	3	930	55	1
2707400	108	596400	Lyttelton	6007	Banks Peninsula Ward	60	Christchurch City	13	Canterbury Region	2.48782e+06	5.73418e+06	1	2707400	4	941	38	2
2838100	48	601040	Oamaru South	6802	Oamaru Ward	68	Waitaki District	14	Otago Region	2.35035e+06	5.56432e+06	1	2838100	4	941	17	2
2837600	42	601040	Oamaru South	6802	Oamaru Ward	68	Waitaki District	14	Otago Region	2.35008e+06	5.56493e+06	1	2837600	5	955	15	2
2837500	81	601040	Oamaru South	6802	Oamaru Ward	68	Waitaki District	14	Otago Region	2.34995e+06	5.56497e+06	1	2837500	8	1047	36	3
2445300	141	586302	Rangiora West	5903	Rangiora Ward	59	Waimakariri District	13	Canterbury Region	2.47675e+06	5.76621e+06	1	2445300	6	978	49	2
2445401	192	586302	Rangiora West	5903	Rangiora Ward	59	Waimakariri District	13	Canterbury Region	2.47705e+06	5.76623e+06	1	2445401	5	960	67	2
2445402	96	586303	Rangiora East	5903	Rangiora Ward	59	Waimakariri District	13	Canterbury Region	2.47721e+06	5.76633e+06	1	2445402	4	942	34	2
2444200	123	586306	Rangiora North	5903	Rangiora Ward	59	Waimakariri District	13	Canterbury Region	2.47692e+06	5.76739e+06	1	2444200	9	1081	55	3
85400	117	502102	Kamo East	204	Denby Ward	2	Whangarei District	01	Northland Region	2.62923e+06	6.61145e+06	1	85400	6	988	41	2
2707600	60	596400	Lyttelton	6007	Banks Peninsula Ward	60	Christchurch City	13	Canterbury Region	2.48761e+06	5.73399e+06	1	2707600	7	1007	21	2
2837800	54	601040	Oamaru South	6802	Oamaru Ward	68	Waitaki District	14	Otago Region	2.35004e+06	5.56471e+06	1	2837800	4	941	19	2
2837900	165	601040	Oamaru South	6802	Oamaru Ward	68	Waitaki District	14	Otago Region	2.34993e+06	5.56445e+06	1	2837900	6	992	58	2
2706900	66	596400	Lyttelton	6007	Banks Peninsula Ward	60	Christchurch City	13	Canterbury Region	2.48785e+06	5.7345e+06	1	2706900	5	957	23	2
85600	105	502101	Kamo West	204	Denby Ward	2	Whangarei District	01	Northland Region	2.62865e+06	6.61146e+06	1	85600	3	922	35	1
869700	108	529800	Clarkin	1602	East Ward	16	Hamilton City	03	Waikato Region	2.71082e+06	6.37914e+06	1	869700	9	1093	49	3
869300	141	529600	Chartwell	1602	East Ward	16	Hamilton City	03	Waikato Region	2.71047e+06	6.37946e+06	1	869300	3	921	47	1
2443300	51	586306	Rangiora North	5903	Rangiora Ward	59	Waimakariri District	13	Canterbury Region	2.47657e+06	5.76703e+06	1	2443300	6	993	18	2
870000	87	529800	Clarkin	1602	East Ward	16	Hamilton City	03	Waikato Region	2.71108e+06	6.3789e+06	1	870000	8	1039	39	3
2835700	132	601040	Oamaru South	6802	Oamaru Ward	68	Waitaki District	14	Otago Region	2.34857e+06	5.56516e+06	1	2835700	4	946	46	2
2443700	198	586306	Rangiora North	5903	Rangiora Ward	59	Waimakariri District	13	Canterbury Region	2.4769e+06	5.76767e+06	1	2443700	9	1102	89	3
2446302	105	586302	Rangiora West	5903	Rangiora Ward	59	Waimakariri District	13	Canterbury Region	2.47722e+06	5.7655e+06	1	2446302	3	933	35	1
2446002	204	586302	Rangiora West	5903	Rangiora Ward	59	Waimakariri District	13	Canterbury Region	2.47675e+06	5.76556e+06	1	2446002	5	967	71	2
2446205	69	586303	Rangiora East	5903	Rangiora Ward	59	Waimakariri District	13	Canterbury Region	2.47739e+06	5.7655e+06	1	2446205	7	1017	24	2
2840100	111	601030	Oamaru Central	6802	Oamaru Ward	68	Waitaki District	14	Otago Region	2.349e+06	5.56553e+06	1	2840100	4	950	39	2
2839600	102	601030	Oamaru Central	6802	Oamaru Ward	68	Waitaki District	14	Otago Region	2.34882e+06	5.56552e+06	1	2839600	7	1027	36	2
2840200	87	601030	Oamaru Central	6802	Oamaru Ward	68	Waitaki District	14	Otago Region	2.34943e+06	5.56551e+06	1	2840200	4	953	30	2
2708300	24	596400	Lyttelton	6007	Banks Peninsula Ward	60	Christchurch City	13	Canterbury Region	2.48774e+06	5.73359e+06	1	2708300	4	943	8	2
2839700	75	601030	Oamaru Central	6802	Oamaru Ward	68	Waitaki District	14	Otago Region	2.34899e+06	5.56534e+06	1	2839700	7	1027	26	2
87400	276	502202	Tikipunga East	204	Denby Ward	2	Whangarei District	01	Northland Region	2.6311e+06	6.61173e+06	1	87400	8	1036	124	3
2840700	39	601030	Oamaru Central	6802	Oamaru Ward	68	Waitaki District	14	Otago Region	2.35055e+06	5.56628e+06	1	2840700	9	1091	18	3
87000	132	502202	Tikipunga East	204	Denby Ward	2	Whangarei District	01	Northland Region	2.63087e+06	6.61174e+06	1	87000	6	986	46	2
480800	120	516101	Remuera West	704	Hobson Ward	7	Auckland City	02	Auckland Region	2.66918e+06	6.47965e+06	1	480800	4	951	42	2
480601	192	516101	Remuera West	704	Hobson Ward	7	Auckland City	02	Auckland Region	2.66903e+06	6.47974e+06	1	480601	2	915	63	1
86700	132	502201	Tikipunga West	204	Denby Ward	2	Whangarei District	01	Northland Region	2.63048e+06	6.61181e+06	1	86700	7	1015	46	2
2709200	66	596400	Lyttelton	6007	Banks Peninsula Ward	60	Christchurch City	13	Canterbury Region	2.48743e+06	5.73406e+06	1	2709200	3	918	22	1
2446301	177	586302	Rangiora West	5903	Rangiora Ward	59	Waimakariri District	13	Canterbury Region	2.47714e+06	5.76581e+06	1	2446301	7	1024	62	2
2446004	165	586302	Rangiora West	5903	Rangiora Ward	59	Waimakariri District	13	Canterbury Region	2.47697e+06	5.76559e+06	1	2446004	6	989	58	2
2446005	153	586302	Rangiora West	5903	Rangiora Ward	59	Waimakariri District	13	Canterbury Region	2.47687e+06	5.76558e+06	1	2446005	5	973	54	2
85800	192	502101	Kamo West	204	Denby Ward	2	Whangarei District	01	Northland Region	2.62898e+06	6.61117e+06	1	85800	7	1027	67	2
2838000	120	601040	Oamaru South	6802	Oamaru Ward	68	Waitaki District	14	Otago Region	2.35016e+06	5.56441e+06	1	2838000	3	933	40	1
2838200	78	601040	Oamaru South	6802	Oamaru Ward	68	Waitaki District	14	Otago Region	2.35037e+06	5.56403e+06	1	2838200	4	941	27	2
2707000	87	596400	Lyttelton	6007	Banks Peninsula Ward	60	Christchurch City	13	Canterbury Region	2.48805e+06	5.73434e+06	1	2707000	5	957	30	2
2838400	87	601030	Oamaru Central	6802	Oamaru Ward	68	Waitaki District	14	Otago Region	2.34953e+06	5.56531e+06	1	2838400	5	971	30	2
2838600	120	601030	Oamaru Central	6802	Oamaru Ward	68	Waitaki District	14	Otago Region	2.34977e+06	5.56531e+06	1	2838600	8	1033	54	3
2838500	117	601030	Oamaru Central	6802	Oamaru Ward	68	Waitaki District	14	Otago Region	2.34965e+06	5.56535e+06	1	2838500	6	980	41	2
2445500	36	586302	Rangiora West	5903	Rangiora Ward	59	Waimakariri District	13	Canterbury Region	2.47691e+06	5.76688e+06	1	2445500	4	942	13	2
2444600	63	586302	Rangiora West	5903	Rangiora Ward	59	Waimakariri District	13	Canterbury Region	2.47664e+06	5.76685e+06	1	2444600	8	1034	28	3
2445600	6	586303	Rangiora East	5903	Rangiora Ward	59	Waimakariri District	13	Canterbury Region	2.47711e+06	5.76687e+06	1	2445600	4	942	2	2
871900	63	529800	Clarkin	1602	East Ward	16	Hamilton City	03	Waikato Region	2.71072e+06	6.37942e+06	1	871900	9	1098	28	3
85300	123	502102	Kamo East	204	Denby Ward	2	Whangarei District	01	Northland Region	2.62911e+06	6.61146e+06	1	85300	3	926	41	1
2707300	54	596400	Lyttelton	6007	Banks Peninsula Ward	60	Christchurch City	13	Canterbury Region	2.48767e+06	5.73423e+06	1	2707300	5	957	19	2
2838800	54	601040	Oamaru South	6802	Oamaru Ward	68	Waitaki District	14	Otago Region	2.34912e+06	5.56512e+06	1	2838800	5	973	19	2
2445000	114	586302	Rangiora West	5903	Rangiora Ward	59	Waimakariri District	13	Canterbury Region	2.4768e+06	5.76653e+06	1	2445000	6	979	40	2
85100	96	502102	Kamo East	204	Denby Ward	2	Whangarei District	01	Northland Region	2.62883e+06	6.61155e+06	1	85100	7	1009	34	2
2707500	72	596400	Lyttelton	6007	Banks Peninsula Ward	60	Christchurch City	13	Canterbury Region	2.48764e+06	5.73411e+06	1	2707500	7	1007	25	2
2707800	78	596400	Lyttelton	6007	Banks Peninsula Ward	60	Christchurch City	13	Canterbury Region	2.48784e+06	5.73403e+06	1	2707800	5	962	27	2
2837700	54	601040	Oamaru South	6802	Oamaru Ward	68	Waitaki District	14	Otago Region	2.34991e+06	5.56473e+06	1	2837700	5	955	19	2
85700	114	502101	Kamo West	204	Denby Ward	2	Whangarei District	01	Northland Region	2.62881e+06	6.61129e+06	1	85700	4	947	40	2
2707900	54	596400	Lyttelton	6007	Banks Peninsula Ward	60	Christchurch City	13	Canterbury Region	2.48756e+06	5.73386e+06	1	2707900	5	970	19	2
2707700	27	596400	Lyttelton	6007	Banks Peninsula Ward	60	Christchurch City	13	Canterbury Region	2.48767e+06	5.73383e+06	1	2707700	5	962	9	2
2841800	9	601030	Oamaru Central	6802	Oamaru Ward	68	Waitaki District	14	Otago Region	2.3502e+06	5.56552e+06	1	2841800	8	1064	4	3
2841700	6	601030	Oamaru Central	6802	Oamaru Ward	68	Waitaki District	14	Otago Region	2.35005e+06	5.5655e+06	1	2841700	4	953	2	2
2710900	3	596400	Lyttelton	6007	Banks Peninsula Ward	60	Christchurch City	13	Canterbury Region	2.48759e+06	5.73366e+06	1	2710900	2	899	1	1
614100	72	519200	Mt St John	704	Hobson Ward	7	Auckland City	02	Auckland Region	2.66927e+06	6.47853e+06	1	614100	4	949	25	2
613800	24	519200	Mt St John	704	Hobson Ward	7	Auckland City	02	Auckland Region	2.66903e+06	6.47886e+06	1	613800	4	949	8	2
2448204	222	586305	Kingsbury	5903	Rangiora Ward	59	Waimakariri District	13	Canterbury Region	2.47638e+06	5.76836e+06	1	2448204	1	872	73	1
2841900	48	601030	Oamaru Central	6802	Oamaru Ward	68	Waitaki District	14	Otago Region	2.35e+06	5.56521e+06	1	2841900	8	1064	22	3
89600	96	502300	Whau Valley	204	Denby Ward	2	Whangarei District	01	Northland Region	2.62932e+06	6.61117e+06	1	89600	9	1083	43	3
614200	12	519200	Mt St John	704	Hobson Ward	7	Auckland City	02	Auckland Region	2.6694e+06	6.47838e+06	1	614200	4	949	4	2
89400	114	502300	Whau Valley	204	Denby Ward	2	Whangarei District	01	Northland Region	2.62932e+06	6.61055e+06	1	89400	1	885	38	1
2448213	123	586305	Kingsbury	5903	Rangiora Ward	59	Waimakariri District	13	Canterbury Region	2.47637e+06	5.76791e+06	1	2448213	1	895	41	1
2448216	120	586305	Kingsbury	5903	Rangiora Ward	59	Waimakariri District	13	Canterbury Region	2.47688e+06	5.76801e+06	1	2448216	3	929	40	1
88600	123	502202	Tikipunga East	204	Denby Ward	2	Whangarei District	01	Northland Region	2.63081e+06	6.61032e+06	1	88600	8	1033	55	3
613700	99	519200	Mt St John	704	Hobson Ward	7	Auckland City	02	Auckland Region	2.66894e+06	6.47892e+06	1	613700	10	1162	45	3
89202	33	502101	Kamo West	204	Denby Ward	2	Whangarei District	01	Northland Region	2.6291e+06	6.61103e+06	1	89202	2	916	11	1
481500	162	516101	Remuera West	704	Hobson Ward	7	Auckland City	02	Auckland Region	2.66929e+06	6.47949e+06	1	481500	5	957	57	2
89700	222	502300	Whau Valley	204	Denby Ward	2	Whangarei District	01	Northland Region	2.62949e+06	6.61076e+06	1	89700	7	1010	78	2
2841200	9	601030	Oamaru Central	6802	Oamaru Ward	68	Waitaki District	14	Otago Region	2.35017e+06	5.56591e+06	1	2841200	8	1064	4	3
2841100	6	601030	Oamaru Central	6802	Oamaru Ward	68	Waitaki District	14	Otago Region	2.35039e+06	5.56597e+06	1	2841100	8	1064	3	3
2841300	3	601030	Oamaru Central	6802	Oamaru Ward	68	Waitaki District	14	Otago Region	2.35034e+06	5.56585e+06	1	2841300	8	1064	1	3
89800	117	502300	Whau Valley	204	Denby Ward	2	Whangarei District	01	Northland Region	2.62965e+06	6.61056e+06	1	89800	9	1083	53	3
2708100	123	596400	Lyttelton	6007	Banks Peninsula Ward	60	Christchurch City	13	Canterbury Region	2.48781e+06	5.73361e+06	1	2708100	4	943	43	2
2708200	33	596400	Lyttelton	6007	Banks Peninsula Ward	60	Christchurch City	13	Canterbury Region	2.48784e+06	5.73364e+06	1	2708200	5	970	12	2
2708000	27	596400	Lyttelton	6007	Banks Peninsula Ward	60	Christchurch City	13	Canterbury Region	2.48751e+06	5.73375e+06	1	2708000	5	970	9	2
87600	126	502202	Tikipunga East	204	Denby Ward	2	Whangarei District	01	Northland Region	2.63089e+06	6.61145e+06	1	87600	8	1043	57	3
611500	69	520202	Ellerslie South	706	Tamaki-Maungakiekie Ward	7	Auckland City	02	Auckland Region	2.67101e+06	6.47681e+06	1	611500	4	946	24	2
2840300	102	601030	Oamaru Central	6802	Oamaru Ward	68	Waitaki District	14	Otago Region	2.34921e+06	5.56541e+06	1	2840300	5	973	36	2
88200	105	502201	Tikipunga West	204	Denby Ward	2	Whangarei District	01	Northland Region	2.63066e+06	6.61084e+06	1	88200	7	1014	37	2
88000	144	502202	Tikipunga East	204	Denby Ward	2	Whangarei District	01	Northland Region	2.631e+06	6.61109e+06	1	88000	5	969	50	2
480900	135	516101	Remuera West	704	Hobson Ward	7	Auckland City	02	Auckland Region	2.6691e+06	6.47964e+06	1	480900	7	1001	47	2
2708900	93	596400	Lyttelton	6007	Banks Peninsula Ward	60	Christchurch City	13	Canterbury Region	2.48754e+06	5.73429e+06	1	2708900	3	930	31	1
480603	186	516101	Remuera West	704	Hobson Ward	7	Auckland City	02	Auckland Region	2.66917e+06	6.47995e+06	1	480603	3	928	61	1
86900	147	502201	Tikipunga West	204	Denby Ward	2	Whangarei District	01	Northland Region	2.63071e+06	6.61159e+06	1	86900	8	1051	66	3
2839900	81	601030	Oamaru Central	6802	Oamaru Ward	68	Waitaki District	14	Otago Region	2.34938e+06	5.56585e+06	1	2839900	7	1005	28	2
1587300	15	551400	Moturoa	3301	New Plymouth City Ward	33	New Plymouth District	07	Taranaki Region	2.60097e+06	6.23761e+06	1	1587300	5	956	5	2
480700	36	516101	Remuera West	704	Hobson Ward	7	Auckland City	02	Auckland Region	2.66923e+06	6.47976e+06	1	480700	1	888	12	1
2446006	171	586302	Rangiora West	5903	Rangiora Ward	59	Waimakariri District	13	Canterbury Region	2.47664e+06	5.76595e+06	1	2446006	4	947	60	2
2446100	171	586302	Rangiora West	5903	Rangiora Ward	59	Waimakariri District	13	Canterbury Region	2.47708e+06	5.76599e+06	1	2446100	7	1016	60	2
2446007	192	586302	Rangiora West	5903	Rangiora Ward	59	Waimakariri District	13	Canterbury Region	2.47684e+06	5.76597e+06	1	2446007	4	942	67	2
87700	141	502202	Tikipunga East	204	Denby Ward	2	Whangarei District	01	Northland Region	2.63102e+06	6.61153e+06	1	87700	9	1083	63	3
480602	255	516101	Remuera West	704	Hobson Ward	7	Auckland City	02	Auckland Region	2.66908e+06	6.47986e+06	1	480602	3	931	84	1
611700	69	520202	Ellerslie South	706	Tamaki-Maungakiekie Ward	7	Auckland City	02	Auckland Region	2.67138e+06	6.47668e+06	1	611700	4	946	24	2
2709600	54	596400	Lyttelton	6007	Banks Peninsula Ward	60	Christchurch City	13	Canterbury Region	2.48738e+06	5.73394e+06	1	2709600	9	1090	24	3
480500	138	516101	Remuera West	704	Hobson Ward	7	Auckland City	02	Auckland Region	2.66945e+06	6.48015e+06	1	480500	2	916	46	1
87900	75	502202	Tikipunga East	204	Denby Ward	2	Whangarei District	01	Northland Region	2.63089e+06	6.61119e+06	1	87900	7	1029	26	2
615300	24	519200	Mt St John	704	Hobson Ward	7	Auckland City	02	Auckland Region	2.66898e+06	6.47791e+06	1	615300	1	893	8	1
90600	87	502700	Mairtown	205	Okara Ward	2	Whangarei District	01	Northland Region	2.63004e+06	6.61013e+06	1	90600	9	1103	39	3
2843800	90	601020	Orana Park	6802	Oamaru Ward	68	Waitaki District	14	Otago Region	2.35064e+06	5.56651e+06	1	2843800	9	1091	40	3
614502	54	519200	Mt St John	704	Hobson Ward	7	Auckland City	02	Auckland Region	2.66897e+06	6.47844e+06	1	614502	4	940	19	2
91100	126	502700	Mairtown	205	Okara Ward	2	Whangarei District	01	Northland Region	2.63017e+06	6.60974e+06	1	91100	6	994	44	2
615200	183	519200	Mt St John	704	Hobson Ward	7	Auckland City	02	Auckland Region	2.66889e+06	6.47798e+06	1	615200	9	1076	82	3
2319900	93	582500	Trafalgar	5299	Area Outside Ward	52	Nelson City	17	Nelson Region	2.5336e+06	5.99215e+06	1	2319900	5	958	33	2
2319700	30	582500	Trafalgar	5299	Area Outside Ward	52	Nelson City	17	Nelson Region	2.53367e+06	5.99256e+06	1	2319700	7	999	10	2
615600	219	519200	Mt St John	704	Hobson Ward	7	Auckland City	02	Auckland Region	2.66955e+06	6.47793e+06	1	615600	3	934	72	1
90400	117	502300	Whau Valley	204	Denby Ward	2	Whangarei District	01	Northland Region	2.62976e+06	6.61025e+06	1	90400	9	1075	53	3
615700	192	519200	Mt St John	704	Hobson Ward	7	Auckland City	02	Auckland Region	2.6697e+06	6.47788e+06	1	615700	5	969	67	2
91600	147	502700	Mairtown	205	Okara Ward	2	Whangarei District	01	Northland Region	2.63047e+06	6.60958e+06	1	91600	5	972	51	2
91500	87	502700	Mairtown	205	Okara Ward	2	Whangarei District	01	Northland Region	2.63038e+06	6.6096e+06	1	91500	6	996	30	2
2843500	81	601020	Orana Park	6802	Oamaru Ward	68	Waitaki District	14	Otago Region	2.35079e+06	5.56685e+06	1	2843500	10	1169	36	3
2319600	3	582500	Trafalgar	5299	Area Outside Ward	52	Nelson City	17	Nelson Region	2.53366e+06	5.9927e+06	1	2319600	7	999	1	2
90100	72	502300	Whau Valley	204	Denby Ward	2	Whangarei District	01	Northland Region	2.62923e+06	6.61029e+06	1	90100	7	1002	25	2
2841500	3	601030	Oamaru Central	6802	Oamaru Ward	68	Waitaki District	14	Otago Region	2.35013e+06	5.56566e+06	1	2841500	4	953	1	2
2841400	6	601030	Oamaru Central	6802	Oamaru Ward	68	Waitaki District	14	Otago Region	2.35001e+06	5.56576e+06	1	2841400	4	953	2	2
2709700	15	596400	Lyttelton	6007	Banks Peninsula Ward	60	Christchurch City	13	Canterbury Region	2.48735e+06	5.73382e+06	1	2709700	9	1090	7	3
613600	93	519200	Mt St John	704	Hobson Ward	7	Auckland City	02	Auckland Region	2.66883e+06	6.47892e+06	1	613600	10	1162	42	3
89203	78	502300	Whau Valley	204	Denby Ward	2	Whangarei District	01	Northland Region	2.62923e+06	6.6111e+06	1	89203	6	979	27	2
614300	153	519200	Mt St John	704	Hobson Ward	7	Auckland City	02	Auckland Region	2.66874e+06	6.47845e+06	1	614300	8	1067	69	3
2448904	198	586304	Southbrook	5903	Rangiora Ward	59	Waimakariri District	13	Canterbury Region	2.47728e+06	5.76515e+06	1	2448904	4	946	69	2
2448903	138	586304	Southbrook	5903	Rangiora Ward	59	Waimakariri District	13	Canterbury Region	2.4771e+06	5.76515e+06	1	2448903	4	945	48	2
90000	96	502300	Whau Valley	204	Denby Ward	2	Whangarei District	01	Northland Region	2.62962e+06	6.61044e+06	1	90000	10	1360	43	3
481600	114	516101	Remuera West	704	Hobson Ward	7	Auckland City	02	Auckland Region	2.66948e+06	6.4794e+06	1	481600	1	888	38	1
613900	117	519200	Mt St John	704	Hobson Ward	7	Auckland City	02	Auckland Region	2.66878e+06	6.4787e+06	1	613900	7	1004	41	2
89300	207	502300	Whau Valley	204	Denby Ward	2	Whangarei District	01	Northland Region	2.62935e+06	6.61077e+06	1	89300	6	975	72	2
2448215	219	586305	Kingsbury	5903	Rangiora Ward	59	Waimakariri District	13	Canterbury Region	2.47673e+06	5.7681e+06	1	2448215	3	926	72	1
2448214	159	586305	Kingsbury	5903	Rangiora Ward	59	Waimakariri District	13	Canterbury Region	2.47645e+06	5.76806e+06	1	2448214	2	903	52	1
88301	207	502202	Tikipunga East	204	Denby Ward	2	Whangarei District	01	Northland Region	2.63078e+06	6.61086e+06	1	88301	6	997	72	2
2842000	3	601030	Oamaru Central	6802	Oamaru Ward	68	Waitaki District	14	Otago Region	2.35017e+06	5.5652e+06	1	2842000	8	1064	1	3
2840900	30	601030	Oamaru Central	6802	Oamaru Ward	68	Waitaki District	14	Otago Region	2.35046e+06	5.56611e+06	1	2840900	8	1064	14	3
88700	102	502202	Tikipunga East	204	Denby Ward	2	Whangarei District	01	Northland Region	2.63069e+06	6.61017e+06	1	88700	8	1062	46	3
2448207	123	586305	Kingsbury	5903	Rangiora Ward	59	Waimakariri District	13	Canterbury Region	2.4763e+06	5.76775e+06	1	2448207	2	909	41	1
2448208	90	586305	Kingsbury	5903	Rangiora Ward	59	Waimakariri District	13	Canterbury Region	2.47685e+06	5.76785e+06	1	2448208	2	909	30	1
613400	177	520202	Ellerslie South	706	Tamaki-Maungakiekie Ward	7	Auckland City	02	Auckland Region	2.67129e+06	6.47685e+06	1	613400	4	943	62	2
2841000	33	601030	Oamaru Central	6802	Oamaru Ward	68	Waitaki District	14	Otago Region	2.35022e+06	5.56602e+06	1	2841000	8	1064	15	3
613300	120	520202	Ellerslie South	706	Tamaki-Maungakiekie Ward	7	Auckland City	02	Auckland Region	2.6711e+06	6.47699e+06	1	613300	5	957	42	2
1203206	9	536810	Mt Maunganui North	2301	Mount Maunganui-Papamoa Ward	23	Tauranga City	04	Bay of Plenty Region	2.79177e+06	6.38991e+06	1	1203206	9	1110	4	3
88302	174	502202	Tikipunga East	204	Denby Ward	2	Whangarei District	01	Northland Region	2.63092e+06	6.6108e+06	1	88302	8	1032	78	3
617400	102	519400	One Tree Hill East	706	Tamaki-Maungakiekie Ward	7	Auckland City	02	Auckland Region	2.67078e+06	6.47686e+06	1	617400	5	967	36	2
91800	126	502700	Mairtown	205	Okara Ward	2	Whangarei District	01	Northland Region	2.63041e+06	6.60928e+06	1	91800	8	1034	57	3
878900	144	529401	Queenwood	1602	East Ward	16	Hamilton City	03	Waikato Region	2.70975e+06	6.38132e+06	1	878900	2	911	48	1
878601	126	529401	Queenwood	1602	East Ward	16	Hamilton City	03	Waikato Region	2.7094e+06	6.38166e+06	1	878601	1	862	42	1
616300	273	519200	Mt St John	704	Hobson Ward	7	Auckland City	02	Auckland Region	2.67001e+06	6.47741e+06	1	616300	4	941	96	2
91900	108	502700	Mairtown	205	Okara Ward	2	Whangarei District	01	Northland Region	2.63085e+06	6.60991e+06	1	91900	6	995	38	2
92400	105	502700	Mairtown	205	Okara Ward	2	Whangarei District	01	Northland Region	2.63084e+06	6.60917e+06	1	92400	8	1051	47	3
616900	201	519400	One Tree Hill East	704	Hobson Ward	7	Auckland City	02	Auckland Region	2.67023e+06	6.47728e+06	1	616900	3	928	66	1
2320100	6	582500	Trafalgar	5299	Area Outside Ward	52	Nelson City	17	Nelson Region	2.5339e+06	5.99279e+06	1	2320100	6	977	2	2
879500	201	529401	Queenwood	1602	East Ward	16	Hamilton City	03	Waikato Region	2.71016e+06	6.3806e+06	1	879500	1	892	66	1
616500	189	519200	Mt St John	704	Hobson Ward	7	Auckland City	02	Auckland Region	2.67009e+06	6.47751e+06	1	616500	5	965	66	2
2320500	6	582500	Trafalgar	5299	Area Outside Ward	52	Nelson City	17	Nelson Region	2.53396e+06	5.99241e+06	1	2320500	6	986	2	2
617000	180	519400	One Tree Hill East	704	Hobson Ward	7	Auckland City	02	Auckland Region	2.67033e+06	6.47717e+06	1	617000	1	877	59	1
879300	117	529401	Queenwood	1602	East Ward	16	Hamilton City	03	Waikato Region	2.71017e+06	6.38078e+06	1	879300	3	926	39	1
878602	69	529401	Queenwood	1602	East Ward	16	Hamilton City	03	Waikato Region	2.7098e+06	6.38154e+06	1	878602	1	897	23	1
2320600	3	582500	Trafalgar	5299	Area Outside Ward	52	Nelson City	17	Nelson Region	2.53394e+06	5.9923e+06	1	2320600	6	986	1	2
617600	117	519400	One Tree Hill East	706	Tamaki-Maungakiekie Ward	7	Auckland City	02	Auckland Region	2.67066e+06	6.47666e+06	1	617600	5	963	41	2
2843700	72	601020	Orana Park	6802	Oamaru Ward	68	Waitaki District	14	Otago Region	2.3507e+06	5.56662e+06	1	2843700	8	1063	32	3
91700	135	502700	Mairtown	205	Okara Ward	2	Whangarei District	01	Northland Region	2.63058e+06	6.60954e+06	1	91700	9	1094	61	3
615900	210	519200	Mt St John	704	Hobson Ward	7	Auckland City	02	Auckland Region	2.6699e+06	6.47774e+06	1	615900	4	942	74	2
90300	117	502300	Whau Valley	204	Denby Ward	2	Whangarei District	01	Northland Region	2.62954e+06	6.61026e+06	1	90300	6	983	41	2
91200	189	502700	Mairtown	205	Okara Ward	2	Whangarei District	01	Northland Region	2.63049e+06	6.61002e+06	1	91200	9	1104	85	3
614700	159	519200	Mt St John	704	Hobson Ward	7	Auckland City	02	Auckland Region	2.66879e+06	6.47822e+06	1	614700	5	968	56	2
615000	186	519200	Mt St John	704	Hobson Ward	7	Auckland City	02	Auckland Region	2.66948e+06	6.47819e+06	1	615000	2	915	61	1
2843900	60	601020	Orana Park	6802	Oamaru Ward	68	Waitaki District	14	Otago Region	2.35061e+06	5.5664e+06	1	2843900	9	1091	27	3
221903	48	513430	Hobsonville	601	Massey Ward	6	Waitakere City	02	Auckland Region	2.65876e+06	6.489e+06	1	221903	3	927	16	1
90500	129	502300	Whau Valley	204	Denby Ward	2	Whangarei District	01	Northland Region	2.62991e+06	6.61022e+06	1	90500	10	1202	58	3
614900	225	519200	Mt St John	704	Hobson Ward	7	Auckland City	02	Auckland Region	2.66936e+06	6.47805e+06	1	614900	5	960	79	2
2319800	15	582500	Trafalgar	5299	Area Outside Ward	52	Nelson City	17	Nelson Region	2.53361e+06	5.99241e+06	1	2319800	7	999	5	2
614400	96	519200	Mt St John	704	Hobson Ward	7	Auckland City	02	Auckland Region	2.66884e+06	6.47842e+06	1	614400	4	940	34	2
90800	111	502700	Mairtown	205	Okara Ward	2	Whangarei District	01	Northland Region	2.63008e+06	6.60995e+06	1	90800	9	1073	50	3
91300	129	502700	Mairtown	205	Okara Ward	2	Whangarei District	01	Northland Region	2.63056e+06	6.60985e+06	1	91300	8	1062	58	3
614600	189	519200	Mt St John	704	Hobson Ward	7	Auckland City	02	Auckland Region	2.66926e+06	6.47831e+06	1	614600	4	938	66	2
2843400	6	601020	Orana Park	6802	Oamaru Ward	68	Waitaki District	14	Otago Region	2.35121e+06	5.56695e+06	1	2843400	8	1031	3	3
2843200	78	601020	Orana Park	6802	Oamaru Ward	68	Waitaki District	14	Otago Region	2.35083e+06	5.56697e+06	1	2843200	8	1042	35	3
90200	132	502300	Whau Valley	204	Denby Ward	2	Whangarei District	01	Northland Region	2.62935e+06	6.61022e+06	1	90200	7	1009	46	2
615100	171	519200	Mt St John	704	Hobson Ward	7	Auckland City	02	Auckland Region	2.66873e+06	6.47795e+06	1	615100	6	990	60	2
616000	147	519200	Mt St John	704	Hobson Ward	7	Auckland City	02	Auckland Region	2.67016e+06	6.47756e+06	1	616000	6	986	51	2
90900	138	502700	Mairtown	205	Okara Ward	2	Whangarei District	01	Northland Region	2.63028e+06	6.61019e+06	1	90900	6	976	48	2
2843600	60	601020	Orana Park	6802	Oamaru Ward	68	Waitaki District	14	Otago Region	2.35074e+06	5.56674e+06	1	2843600	8	1063	27	3
614800	195	519200	Mt St John	704	Hobson Ward	7	Auckland City	02	Auckland Region	2.66895e+06	6.47811e+06	1	614800	5	974	68	2
1495800	45	548000	Mayfair	3005	Hastings Ward	30	Hastings District	06	Hawke's Bay Region	2.84074e+06	6.16717e+06	1	1495800	7	1004	16	2
2321800	99	582800	Bronte	5299	Area Outside Ward	52	Nelson City	17	Nelson Region	2.53383e+06	5.99204e+06	1	2321800	2	910	33	1
93700	288	502400	Otangarei	204	Denby Ward	2	Whangarei District	01	Northland Region	2.62964e+06	6.61087e+06	1	93700	10	1396	130	3
94300	108	502400	Otangarei	204	Denby Ward	2	Whangarei District	01	Northland Region	2.63035e+06	6.6108e+06	1	94300	10	1425	49	3
95200	129	502600	Kensington	205	Okara Ward	2	Whangarei District	01	Northland Region	2.63017e+06	6.60923e+06	1	95200	6	984	45	2
619700	114	519400	One Tree Hill East	706	Tamaki-Maungakiekie Ward	7	Auckland City	02	Auckland Region	2.67107e+06	6.47613e+06	1	619700	6	997	40	2
95100	153	502600	Kensington	205	Okara Ward	2	Whangarei District	01	Northland Region	2.63007e+06	6.60955e+06	1	95100	8	1067	69	3
1406102	276	545722	Whakatu	3004	Clive Ward	30	Hastings District	06	Hawke's Bay Region	2.84447e+06	6.17048e+06	1	1406102	7	1028	97	2
2583900	162	594300	Opawa	6006	Spreydon-Heathcote Ward	60	Christchurch City	13	Canterbury Region	2.48193e+06	5.73951e+06	1	2583900	7	1018	57	2
94500	189	502600	Kensington	204	Denby Ward	2	Whangarei District	01	Northland Region	2.62936e+06	6.60986e+06	1	94500	7	1023	66	2
619300	144	519400	One Tree Hill East	706	Tamaki-Maungakiekie Ward	7	Auckland City	02	Auckland Region	2.67094e+06	6.4766e+06	1	619300	7	1029	50	2
2320200	6	582500	Trafalgar	5299	Area Outside Ward	52	Nelson City	17	Nelson Region	2.5339e+06	5.99269e+06	1	2320200	6	977	2	2
616200	228	519200	Mt St John	704	Hobson Ward	7	Auckland City	02	Auckland Region	2.66978e+06	6.47761e+06	1	616200	3	924	75	1
2320300	18	582500	Trafalgar	5299	Area Outside Ward	52	Nelson City	17	Nelson Region	2.53389e+06	5.99256e+06	1	2320300	6	977	6	2
1501000	120	548100	Parkvale	3005	Hastings Ward	30	Hastings District	06	Hawke's Bay Region	2.84058e+06	6.16598e+06	1	1501000	7	1020	42	2
1500900	75	548100	Parkvale	3005	Hastings Ward	30	Hastings District	06	Hawke's Bay Region	2.84072e+06	6.166e+06	1	1500900	7	1004	26	2
92200	120	502700	Mairtown	205	Okara Ward	2	Whangarei District	01	Northland Region	2.6308e+06	6.60937e+06	1	92200	7	1023	42	2
617300	186	519400	One Tree Hill East	704	Hobson Ward	7	Auckland City	02	Auckland Region	2.67057e+06	6.47697e+06	1	617300	3	923	61	1
617500	144	519400	One Tree Hill East	706	Tamaki-Maungakiekie Ward	7	Auckland City	02	Auckland Region	2.67073e+06	6.47675e+06	1	617500	3	927	48	1
2320400	6	582500	Trafalgar	5299	Area Outside Ward	52	Nelson City	17	Nelson Region	2.53384e+06	5.99241e+06	1	2320400	6	977	2	2
93000	153	502400	Otangarei	204	Denby Ward	2	Whangarei District	01	Northland Region	2.63034e+06	6.61049e+06	1	93000	9	1122	69	3
92100	135	502700	Mairtown	205	Okara Ward	2	Whangarei District	01	Northland Region	2.63075e+06	6.60956e+06	1	92100	7	1006	47	2
617100	228	519400	One Tree Hill East	704	Hobson Ward	7	Auckland City	02	Auckland Region	2.67041e+06	6.47706e+06	1	617100	3	932	75	1
92300	141	502700	Mairtown	205	Okara Ward	2	Whangarei District	01	Northland Region	2.63066e+06	6.60921e+06	1	92300	8	1043	63	3
93100	114	502400	Otangarei	204	Denby Ward	2	Whangarei District	01	Northland Region	2.63054e+06	6.61012e+06	1	93100	9	1075	51	3
92000	156	502700	Mairtown	205	Okara Ward	2	Whangarei District	01	Northland Region	2.63085e+06	6.60968e+06	1	92000	6	978	55	2
2455601	144	586604	Ohoka	5901	Oxford-Eyre Ward	59	Waimakariri District	13	Canterbury Region	2.4757e+06	5.76063e+06	1	2455601	1	881	48	1
95700	42	502800	Regent	205	Okara Ward	2	Whangarei District	01	Northland Region	2.62991e+06	6.60874e+06	1	95700	6	979	15	2
96100	165	502800	Regent	205	Okara Ward	2	Whangarei District	01	Northland Region	2.63012e+06	6.60848e+06	1	96100	9	1113	74	3
96000	135	502800	Regent	205	Okara Ward	2	Whangarei District	01	Northland Region	2.63026e+06	6.60888e+06	1	96000	9	1081	61	3
2455706	93	586604	Ohoka	5901	Oxford-Eyre Ward	59	Waimakariri District	13	Canterbury Region	2.47463e+06	5.75705e+06	1	2455706	1	891	31	1
97200	66	502800	Regent	205	Okara Ward	2	Whangarei District	01	Northland Region	2.63044e+06	6.60841e+06	1	97200	7	1013	23	2
96700	36	502800	Regent	205	Okara Ward	2	Whangarei District	01	Northland Region	2.63077e+06	6.60906e+06	1	96700	7	1020	13	2
1406200	90	545722	Whakatu	3004	Clive Ward	30	Hastings District	06	Hawke's Bay Region	2.84423e+06	6.16989e+06	1	1406200	7	1020	31	2
95800	57	502800	Regent	205	Okara Ward	2	Whangarei District	01	Northland Region	2.63002e+06	6.60877e+06	1	95800	6	979	20	2
96400	57	502800	Regent	205	Okara Ward	2	Whangarei District	01	Northland Region	2.63029e+06	6.6086e+06	1	96400	10	1146	26	3
94200	123	502400	Otangarei	204	Denby Ward	2	Whangarei District	01	Northland Region	2.63037e+06	6.61096e+06	1	94200	10	1367	55	3
95300	162	502600	Kensington	204	Denby Ward	2	Whangarei District	01	Northland Region	2.62976e+06	6.6092e+06	1	95300	5	969	57	2
94700	135	502600	Kensington	204	Denby Ward	2	Whangarei District	01	Northland Region	2.62961e+06	6.60968e+06	1	94700	9	1097	61	3
94800	78	502600	Kensington	204	Denby Ward	2	Whangarei District	01	Northland Region	2.62983e+06	6.60973e+06	1	94800	10	1228	35	3
619600	168	519400	One Tree Hill East	706	Tamaki-Maungakiekie Ward	7	Auckland City	02	Auckland Region	2.67104e+06	6.47636e+06	1	619600	4	949	59	2
95400	198	502600	Kensington	204	Denby Ward	2	Whangarei District	01	Northland Region	2.62977e+06	6.60909e+06	1	95400	6	979	69	2
619400	108	519400	One Tree Hill East	706	Tamaki-Maungakiekie Ward	7	Auckland City	02	Auckland Region	2.67087e+06	6.47645e+06	1	619400	5	970	38	2
2585100	162	594300	Opawa	6006	Spreydon-Heathcote Ward	60	Christchurch City	13	Canterbury Region	2.48253e+06	5.73864e+06	1	2585100	4	942	57	2
94900	54	502600	Kensington	204	Denby Ward	2	Whangarei District	01	Northland Region	2.62983e+06	6.60988e+06	1	94900	10	1228	24	3
97600	36	503000	Vinetown	205	Okara Ward	2	Whangarei District	01	Northland Region	2.62966e+06	6.60792e+06	1	97600	9	1100	16	3
97800	213	503000	Vinetown	205	Okara Ward	2	Whangarei District	01	Northland Region	2.62944e+06	6.60777e+06	1	97800	9	1105	96	3
98800	33	503000	Vinetown	205	Okara Ward	2	Whangarei District	01	Northland Region	2.6297e+06	6.60724e+06	1	98800	9	1123	15	3
490900	84	516001	Mt Hobson	704	Hobson Ward	7	Auckland City	02	Auckland Region	2.66904e+06	6.47903e+06	1	490900	6	989	29	2
491100	99	516001	Mt Hobson	704	Hobson Ward	7	Auckland City	02	Auckland Region	2.6693e+06	6.47921e+06	1	491100	1	897	33	1
97900	90	503000	Vinetown	205	Okara Ward	2	Whangarei District	01	Northland Region	2.62919e+06	6.60746e+06	1	97900	6	981	31	2
623100	201	519300	One Tree Hill Central	704	Hobson Ward	7	Auckland City	02	Auckland Region	2.6687e+06	6.47715e+06	1	623100	6	994	70	2
491900	201	516002	Remuera South	704	Hobson Ward	7	Auckland City	02	Auckland Region	2.67005e+06	6.47819e+06	1	491900	3	930	66	1
98100	93	503000	Vinetown	205	Okara Ward	2	Whangarei District	01	Northland Region	2.62951e+06	6.60765e+06	1	98100	8	1070	42	3
98700	111	503000	Vinetown	205	Okara Ward	2	Whangarei District	01	Northland Region	2.62942e+06	6.60717e+06	1	98700	10	1190	50	3
492000	162	516002	Remuera South	704	Hobson Ward	7	Auckland City	02	Auckland Region	2.67013e+06	6.47799e+06	1	492000	5	958	57	2
1195900	162	536810	Mt Maunganui North	2301	Mount Maunganui-Papamoa Ward	23	Tauranga City	04	Bay of Plenty Region	2.79148e+06	6.39089e+06	1	1195900	2	909	53	1
97700	72	503000	Vinetown	205	Okara Ward	2	Whangarei District	01	Northland Region	2.62911e+06	6.6076e+06	1	97700	9	1100	32	3
97500	126	503000	Vinetown	205	Okara Ward	2	Whangarei District	01	Northland Region	2.62964e+06	6.60823e+06	1	97500	7	1027	44	2
97300	78	502800	Regent	205	Okara Ward	2	Whangarei District	01	Northland Region	2.63029e+06	6.60821e+06	1	97300	9	1113	35	3
98000	33	503000	Vinetown	205	Okara Ward	2	Whangarei District	01	Northland Region	2.62934e+06	6.60757e+06	1	98000	6	981	12	2
98500	114	503000	Vinetown	205	Okara Ward	2	Whangarei District	01	Northland Region	2.62954e+06	6.60737e+06	1	98500	8	1041	51	3
2455704	111	586604	Ohoka	5901	Oxford-Eyre Ward	59	Waimakariri District	13	Canterbury Region	2.47588e+06	5.76011e+06	1	2455704	2	905	37	1
96600	132	502800	Regent	205	Okara Ward	2	Whangarei District	01	Northland Region	2.63059e+06	6.60901e+06	1	96600	4	944	46	2
95900	153	502800	Regent	205	Okara Ward	2	Whangarei District	01	Northland Region	2.63019e+06	6.609e+06	1	95900	7	1027	54	2
96900	48	502800	Regent	205	Okara Ward	2	Whangarei District	01	Northland Region	2.63054e+06	6.60885e+06	1	96900	7	1020	17	2
97100	111	502800	Regent	205	Okara Ward	2	Whangarei District	01	Northland Region	2.63051e+06	6.60851e+06	1	97100	7	1013	39	2
95602	6	503000	Vinetown	204	Denby Ward	2	Whangarei District	01	Northland Region	2.62949e+06	6.60805e+06	1	95602	4	946	2	2
96800	60	502800	Regent	205	Okara Ward	2	Whangarei District	01	Northland Region	2.63074e+06	6.60889e+06	1	96800	7	1020	21	2
1588800	81	551900	Kawaroa	3301	New Plymouth City Ward	33	New Plymouth District	07	Taranaki Region	2.60173e+06	6.23758e+06	1	1588800	7	1027	28	2
95601	75	502500	Western Hills	204	Denby Ward	2	Whangarei District	01	Northland Region	2.62934e+06	6.60898e+06	1	95601	4	946	26	2
97000	213	502800	Regent	205	Okara Ward	2	Whangarei District	01	Northland Region	2.63055e+06	6.60868e+06	1	97000	9	1094	96	3
95500	156	502500	Western Hills	204	Denby Ward	2	Whangarei District	01	Northland Region	2.62915e+06	6.60927e+06	1	95500	4	946	55	2
96300	21	502800	Regent	205	Okara Ward	2	Whangarei District	01	Northland Region	2.63015e+06	6.60818e+06	1	96300	6	979	7	2
96500	108	502800	Regent	205	Okara Ward	2	Whangarei District	01	Northland Region	2.63041e+06	6.60901e+06	1	96500	6	988	38	2
2459100	138	586802	Oxford	5901	Oxford-Eyre Ward	59	Waimakariri District	13	Canterbury Region	2.44349e+06	5.76707e+06	1	2459100	7	1000	48	2
623902	81	519300	One Tree Hill Central	704	Hobson Ward	7	Auckland City	02	Auckland Region	2.66875e+06	6.47655e+06	1	623902	1	893	27	1
624500	219	519300	One Tree Hill Central	704	Hobson Ward	7	Auckland City	02	Auckland Region	2.66861e+06	6.47604e+06	1	624500	2	900	72	1
100200	9	503100	Whangarei Central	205	Okara Ward	2	Whangarei District	01	Northland Region	2.63001e+06	6.60756e+06	1	100200	9	1081	4	3
624000	162	519300	One Tree Hill Central	704	Hobson Ward	7	Auckland City	02	Auckland Region	2.6687e+06	6.47702e+06	1	624000	5	967	57	2
2459000	57	586802	Oxford	5901	Oxford-Eyre Ward	59	Waimakariri District	13	Canterbury Region	2.44256e+06	5.76724e+06	1	2459000	5	960	20	2
624700	228	519300	One Tree Hill Central	706	Tamaki-Maungakiekie Ward	7	Auckland City	02	Auckland Region	2.66869e+06	6.47549e+06	1	624700	8	1042	103	3
623901	36	519300	One Tree Hill Central	704	Hobson Ward	7	Auckland City	02	Auckland Region	2.66886e+06	6.47662e+06	1	623901	1	893	12	1
624200	111	519300	One Tree Hill Central	704	Hobson Ward	7	Auckland City	02	Auckland Region	2.66853e+06	6.47635e+06	1	624200	5	954	39	2
99901	54	503100	Whangarei Central	205	Okara Ward	2	Whangarei District	01	Northland Region	2.63059e+06	6.60734e+06	1	99901	10	1167	24	3
624302	24	519300	One Tree Hill Central	704	Hobson Ward	7	Auckland City	02	Auckland Region	2.66873e+06	6.47634e+06	1	624302	3	923	8	1
99600	54	503100	Whangarei Central	205	Okara Ward	2	Whangarei District	01	Northland Region	2.63031e+06	6.60793e+06	1	99600	9	1081	24	3
490701	3	516001	Mt Hobson	704	Hobson Ward	7	Auckland City	02	Auckland Region	2.66887e+06	6.47946e+06	1	490701	7	1016	1	2
98200	81	503000	Vinetown	205	Okara Ward	2	Whangarei District	01	Northland Region	2.62961e+06	6.60755e+06	1	98200	8	1070	36	3
491301	60	516001	Mt Hobson	704	Hobson Ward	7	Auckland City	02	Auckland Region	2.6693e+06	6.4787e+06	1	491301	6	990	21	2
490702	162	516001	Mt Hobson	704	Hobson Ward	7	Auckland City	02	Auckland Region	2.66922e+06	6.47937e+06	1	490702	7	1016	57	2
97400	183	502800	Regent	205	Okara Ward	2	Whangarei District	01	Northland Region	2.63042e+06	6.60817e+06	1	97400	8	1046	82	3
98900	81	503000	Vinetown	205	Okara Ward	2	Whangarei District	01	Northland Region	2.62945e+06	6.60706e+06	1	98900	10	1190	36	3
492100	84	516002	Remuera South	704	Hobson Ward	7	Auckland City	02	Auckland Region	2.67044e+06	6.47779e+06	1	492100	5	958	29	2
98600	105	503000	Vinetown	205	Okara Ward	2	Whangarei District	01	Northland Region	2.62934e+06	6.60726e+06	1	98600	9	1074	47	3
98400	99	503000	Vinetown	205	Okara Ward	2	Whangarei District	01	Northland Region	2.62929e+06	6.6074e+06	1	98400	9	1074	45	3
491302	162	516001	Mt Hobson	704	Hobson Ward	7	Auckland City	02	Auckland Region	2.66949e+06	6.47843e+06	1	491302	6	995	57	2
2458200	171	586802	Oxford	5901	Oxford-Eyre Ward	59	Waimakariri District	13	Canterbury Region	2.44418e+06	5.76717e+06	1	2458200	6	996	60	2
98300	111	503000	Vinetown	205	Okara Ward	2	Whangarei District	01	Northland Region	2.6297e+06	6.60748e+06	1	98300	10	1336	50	3
100800	3	503100	Whangarei Central	205	Okara Ward	2	Whangarei District	01	Northland Region	2.62977e+06	6.60742e+06	1	100800	9	1081	1	3
2460102	51	586802	Oxford	5901	Oxford-Eyre Ward	59	Waimakariri District	13	Canterbury Region	2.44151e+06	5.76783e+06	1	2460102	6	975	18	2
2460200	129	586802	Oxford	5901	Oxford-Eyre Ward	59	Waimakariri District	13	Canterbury Region	2.44372e+06	5.76735e+06	1	2460200	6	975	45	2
494901	219	516003	Abbotts Park	706	Tamaki-Maungakiekie Ward	7	Auckland City	02	Auckland Region	2.67082e+06	6.47717e+06	1	494901	3	920	72	1
495200	117	516003	Abbotts Park	706	Tamaki-Maungakiekie Ward	7	Auckland City	02	Auckland Region	2.67048e+06	6.47741e+06	1	495200	5	958	41	2
495000	132	516003	Abbotts Park	706	Tamaki-Maungakiekie Ward	7	Auckland City	02	Auckland Region	2.67072e+06	6.47729e+06	1	495000	3	930	44	1
2441801	153	585802	Amberley	5804	Amberley Ward	58	Hurunui District	13	Canterbury Region	2.48819e+06	5.78365e+06	1	2441801	7	1003	54	2
100700	3	503100	Whangarei Central	205	Okara Ward	2	Whangarei District	01	Northland Region	2.62998e+06	6.60737e+06	1	100700	9	1081	1	3
3116200	99	610800	Gladstone-Avenal	7599	Area Outside Ward	75	Invercargill City	15	Southland Region	2.15194e+06	5.41328e+06	1	3116200	5	973	35	2
624100	105	519300	One Tree Hill Central	704	Hobson Ward	7	Auckland City	02	Auckland Region	2.66852e+06	6.4765e+06	1	624100	3	921	35	1
99000	123	503000	Vinetown	205	Okara Ward	2	Whangarei District	01	Northland Region	2.62951e+06	6.60693e+06	1	99000	9	1123	55	3
100300	12	503100	Whangarei Central	205	Okara Ward	2	Whangarei District	01	Northland Region	2.63015e+06	6.60745e+06	1	100300	9	1081	5	3
99700	21	503100	Whangarei Central	205	Okara Ward	2	Whangarei District	01	Northland Region	2.63014e+06	6.60767e+06	1	99700	9	1081	9	3
493800	99	516001	Mt Hobson	704	Hobson Ward	7	Auckland City	02	Auckland Region	2.66965e+06	6.47823e+06	1	493800	9	1133	45	3
493900	255	516002	Remuera South	704	Hobson Ward	7	Auckland City	02	Auckland Region	2.66994e+06	6.47792e+06	1	493900	2	916	84	1
2459300	15	586801	Ashley Gorge	5901	Oxford-Eyre Ward	59	Waimakariri District	13	Canterbury Region	2.44147e+06	5.76633e+06	1	2459300	7	1000	5	2
99300	3	503100	Whangarei Central	205	Okara Ward	2	Whangarei District	01	Northland Region	2.63004e+06	6.60773e+06	1	99300	9	1081	1	3
100500	3	503100	Whangarei Central	205	Okara Ward	2	Whangarei District	01	Northland Region	2.63024e+06	6.60726e+06	1	100500	9	1081	1	3
99800	9	503100	Whangarei Central	205	Okara Ward	2	Whangarei District	01	Northland Region	2.63023e+06	6.60761e+06	1	99800	9	1081	4	3
624400	141	519300	One Tree Hill Central	704	Hobson Ward	7	Auckland City	02	Auckland Region	2.66862e+06	6.47623e+06	1	624400	1	858	47	1
2458900	21	586801	Ashley Gorge	5901	Oxford-Eyre Ward	59	Waimakariri District	13	Canterbury Region	2.44104e+06	5.76765e+06	1	2458900	3	935	7	1
623600	144	519300	One Tree Hill Central	704	Hobson Ward	7	Auckland City	02	Auckland Region	2.66865e+06	6.47677e+06	1	623600	3	930	48	1
100000	21	503100	Whangarei Central	205	Okara Ward	2	Whangarei District	01	Northland Region	2.62981e+06	6.60779e+06	1	100000	9	1081	9	3
2458301	87	586802	Oxford	5901	Oxford-Eyre Ward	59	Waimakariri District	13	Canterbury Region	2.44441e+06	5.76724e+06	1	2458301	6	977	30	2
2458303	135	586802	Oxford	5901	Oxford-Eyre Ward	59	Waimakariri District	13	Canterbury Region	2.44469e+06	5.76731e+06	1	2458303	4	943	47	2
623500	279	519300	One Tree Hill Central	704	Hobson Ward	7	Auckland City	02	Auckland Region	2.6687e+06	6.47688e+06	1	623500	2	909	92	1
623800	99	519300	One Tree Hill Central	704	Hobson Ward	7	Auckland City	02	Auckland Region	2.66854e+06	6.47666e+06	1	623800	3	933	33	1
624301	93	519300	One Tree Hill Central	704	Hobson Ward	7	Auckland City	02	Auckland Region	2.66878e+06	6.47641e+06	1	624301	3	923	31	1
103400	99	502900	Woodhill	205	Okara Ward	2	Whangarei District	01	Northland Region	2.62935e+06	6.60679e+06	1	103400	9	1086	45	3
103900	9	503600	Morningside	205	Okara Ward	2	Whangarei District	01	Northland Region	2.6298e+06	6.60709e+06	1	103900	9	1081	4	3
3117700	99	610800	Gladstone-Avenal	7599	Area Outside Ward	75	Invercargill City	15	Southland Region	2.1519e+06	5.41366e+06	1	3117700	8	1039	45	3
3118600	93	610800	Gladstone-Avenal	7599	Area Outside Ward	75	Invercargill City	15	Southland Region	2.1524e+06	5.41366e+06	1	3118600	3	918	31	1
3118800	78	610800	Gladstone-Avenal	7599	Area Outside Ward	75	Invercargill City	15	Southland Region	2.15283e+06	5.41367e+06	1	3118800	1	895	26	1
3118700	108	610800	Gladstone-Avenal	7599	Area Outside Ward	75	Invercargill City	15	Southland Region	2.1526e+06	5.41366e+06	1	3118700	3	918	36	1
3118900	48	610800	Gladstone-Avenal	7599	Area Outside Ward	75	Invercargill City	15	Southland Region	2.15298e+06	5.41368e+06	1	3118900	1	895	16	1
3117800	108	610800	Gladstone-Avenal	7599	Area Outside Ward	75	Invercargill City	15	Southland Region	2.15218e+06	5.41364e+06	1	3117800	2	910	36	1
103100	153	502900	Woodhill	205	Okara Ward	2	Whangarei District	01	Northland Region	2.62868e+06	6.60661e+06	1	103100	9	1133	69	3
104000	54	503600	Morningside	205	Okara Ward	2	Whangarei District	01	Northland Region	2.62969e+06	6.60679e+06	1	104000	10	1167	24	3
103000	75	502900	Woodhill	205	Okara Ward	2	Whangarei District	01	Northland Region	2.62917e+06	6.60716e+06	1	103000	9	1093	34	3
3118000	81	610800	Gladstone-Avenal	7599	Area Outside Ward	75	Invercargill City	15	Southland Region	2.15223e+06	5.4135e+06	1	3118000	3	928	27	1
3119000	36	610800	Gladstone-Avenal	7599	Area Outside Ward	75	Invercargill City	15	Southland Region	2.15245e+06	5.41352e+06	1	3119000	2	913	12	1
3117900	117	610800	Gladstone-Avenal	7599	Area Outside Ward	75	Invercargill City	15	Southland Region	2.15194e+06	5.41354e+06	1	3117900	3	928	39	1
102901	48	502900	Woodhill	205	Okara Ward	2	Whangarei District	01	Northland Region	2.62897e+06	6.60712e+06	1	102901	5	972	17	2
103600	126	502900	Woodhill	205	Okara Ward	2	Whangarei District	01	Northland Region	2.62907e+06	6.60663e+06	1	103600	10	1179	57	3
102902	45	502900	Woodhill	205	Okara Ward	2	Whangarei District	01	Northland Region	2.62901e+06	6.60698e+06	1	102902	5	972	16	2
495100	117	516003	Abbotts Park	706	Tamaki-Maungakiekie Ward	7	Auckland City	02	Auckland Region	2.67063e+06	6.47741e+06	1	495100	3	926	39	1
494100	51	516002	Remuera South	704	Hobson Ward	7	Auckland City	02	Auckland Region	2.6702e+06	6.47766e+06	1	494100	2	916	17	1
2460101	24	586802	Oxford	5901	Oxford-Eyre Ward	59	Waimakariri District	13	Canterbury Region	2.44271e+06	5.76734e+06	1	2460101	6	975	8	2
3116300	81	610800	Gladstone-Avenal	7599	Area Outside Ward	75	Invercargill City	15	Southland Region	2.1522e+06	5.41337e+06	1	3116300	3	932	27	1
102500	69	502900	Woodhill	205	Okara Ward	2	Whangarei District	01	Northland Region	2.62888e+06	6.60729e+06	1	102500	6	987	24	2
101700	6	503100	Whangarei Central	205	Okara Ward	2	Whangarei District	01	Northland Region	2.6306e+06	6.60697e+06	1	101700	6	993	2	2
3119100	42	610800	Gladstone-Avenal	7599	Area Outside Ward	75	Invercargill City	15	Southland Region	2.15248e+06	5.41347e+06	1	3119100	2	913	14	1
105800	66	503300	Horahora	205	Okara Ward	2	Whangarei District	01	Northland Region	2.6284e+06	6.6065e+06	1	105800	6	974	23	2
103200	54	502900	Woodhill	205	Okara Ward	2	Whangarei District	01	Northland Region	2.62902e+06	6.60673e+06	1	103200	8	1043	24	3
3118300	78	610800	Gladstone-Avenal	7599	Area Outside Ward	75	Invercargill City	15	Southland Region	2.15259e+06	5.41382e+06	1	3118300	5	953	27	2
3118400	117	610800	Gladstone-Avenal	7599	Area Outside Ward	75	Invercargill City	15	Southland Region	2.15281e+06	5.41384e+06	1	3118400	1	871	39	1
3118500	102	610800	Gladstone-Avenal	7599	Area Outside Ward	75	Invercargill City	15	Southland Region	2.15304e+06	5.41385e+06	1	3118500	1	873	34	1
3117400	102	610800	Gladstone-Avenal	7599	Area Outside Ward	75	Invercargill City	15	Southland Region	2.15189e+06	5.41378e+06	1	3117400	5	969	36	2
3117600	78	610800	Gladstone-Avenal	7599	Area Outside Ward	75	Invercargill City	15	Southland Region	2.15218e+06	5.41381e+06	1	3117600	2	910	26	1
3118200	78	610800	Gladstone-Avenal	7599	Area Outside Ward	75	Invercargill City	15	Southland Region	2.1524e+06	5.4138e+06	1	3118200	5	953	27	2
104200	57	503600	Morningside	205	Okara Ward	2	Whangarei District	01	Northland Region	2.62937e+06	6.60648e+06	1	104200	10	1172	26	3
2331800	57	582700	Kirks	5299	Area Outside Ward	52	Nelson City	17	Nelson Region	2.53345e+06	5.99224e+06	1	2331800	6	987	20	2
103500	99	502900	Woodhill	205	Okara Ward	2	Whangarei District	01	Northland Region	2.62922e+06	6.60664e+06	1	103500	8	1031	45	3
103800	102	502900	Woodhill	205	Okara Ward	2	Whangarei District	01	Northland Region	2.62885e+06	6.60645e+06	1	103800	9	1113	46	3
102702	210	502900	Woodhill	205	Okara Ward	2	Whangarei District	01	Northland Region	2.62877e+06	6.60695e+06	1	102702	6	983	74	2
3118100	117	610800	Gladstone-Avenal	7599	Area Outside Ward	75	Invercargill City	15	Southland Region	2.15194e+06	5.41341e+06	1	3118100	3	927	39	1
103700	117	502900	Woodhill	205	Okara Ward	2	Whangarei District	01	Northland Region	2.62914e+06	6.60642e+06	1	103700	9	1113	53	3
1590100	96	552002	Marsland Hill	3301	New Plymouth City Ward	33	New Plymouth District	07	Taranaki Region	2.6028e+06	6.23745e+06	1	1590100	9	1079	43	3
103300	24	502900	Woodhill	205	Okara Ward	2	Whangarei District	01	Northland Region	2.62925e+06	6.60689e+06	1	103300	9	1093	11	3
106203	60	503300	Horahora	205	Okara Ward	2	Whangarei District	01	Northland Region	2.62793e+06	6.60628e+06	1	106203	6	988	21	2
2727900	39	597820	Ashburton Central West	6303	Ashburton Ward	63	Ashburton District	13	Canterbury Region	2.40948e+06	5.70011e+06	1	2727900	3	928	13	1
2729100	75	597850	Hampstead	6303	Ashburton Ward	63	Ashburton District	13	Canterbury Region	2.40944e+06	5.69848e+06	1	2729100	8	1056	34	3
2729000	186	597850	Hampstead	6303	Ashburton Ward	63	Ashburton District	13	Canterbury Region	2.40975e+06	5.69848e+06	1	2729000	7	1022	65	2
2727800	69	597820	Ashburton Central West	6303	Ashburton Ward	63	Ashburton District	13	Canterbury Region	2.40934e+06	5.70005e+06	1	2727800	3	925	23	1
106000	132	503300	Horahora	205	Okara Ward	2	Whangarei District	01	Northland Region	2.62771e+06	6.60646e+06	1	106000	9	1104	59	3
892800	27	530200	Hamilton East	1603	South Ward	16	Hamilton City	03	Waikato Region	2.71219e+06	6.37659e+06	1	892800	9	1092	12	3
2728200	30	597840	Ashburton Central East	6303	Ashburton Ward	63	Ashburton District	13	Canterbury Region	2.40918e+06	5.69919e+06	1	2728200	9	1125	14	3
2728300	84	597840	Ashburton Central East	6303	Ashburton Ward	63	Ashburton District	13	Canterbury Region	2.40947e+06	5.69916e+06	1	2728300	2	915	28	1
106500	156	503400	Maunu	205	Okara Ward	2	Whangarei District	01	Northland Region	2.62692e+06	6.60612e+06	1	106500	5	963	55	2
106201	66	503300	Horahora	205	Okara Ward	2	Whangarei District	01	Northland Region	2.62743e+06	6.60635e+06	1	106201	1	879	22	1
106802	129	503400	Maunu	205	Okara Ward	2	Whangarei District	01	Northland Region	2.62747e+06	6.60577e+06	1	106802	5	958	45	2
2728600	81	597840	Ashburton Central East	6303	Ashburton Ward	63	Ashburton District	13	Canterbury Region	2.40956e+06	5.69892e+06	1	2728600	2	915	27	1
762800	252	525201	Clevedon	807	Botany-Clevedon Ward	8	Manukau City	02	Auckland Region	2.69181e+06	6.4662e+06	1	762800	2	908	83	1
105900	102	503300	Horahora	205	Okara Ward	2	Whangarei District	01	Northland Region	2.6281e+06	6.6065e+06	1	105900	6	988	36	2
763000	105	525201	Clevedon	807	Botany-Clevedon Ward	8	Manukau City	02	Auckland Region	2.69164e+06	6.46509e+06	1	763000	2	914	35	1
105700	99	503300	Horahora	205	Okara Ward	2	Whangarei District	01	Northland Region	2.6283e+06	6.60662e+06	1	105700	10	1156	45	3
104400	150	503600	Morningside	205	Okara Ward	2	Whangarei District	01	Northland Region	2.6294e+06	6.60632e+06	1	104400	10	1172	68	3
3119200	6	610800	Gladstone-Avenal	7599	Area Outside Ward	75	Invercargill City	15	Southland Region	2.15298e+06	5.41356e+06	1	3119200	2	913	2	1
895000	6	530200	Hamilton East	1603	South Ward	16	Hamilton City	03	Waikato Region	2.71202e+06	6.37648e+06	1	895000	8	1056	3	3
894900	27	530200	Hamilton East	1603	South Ward	16	Hamilton City	03	Waikato Region	2.712e+06	6.37676e+06	1	894900	8	1056	12	3
3123600	156	610700	Rosedale	7599	Area Outside Ward	75	Invercargill City	15	Southland Region	2.15365e+06	5.41395e+06	1	3123600	1	885	51	1
3123700	159	610700	Rosedale	7599	Area Outside Ward	75	Invercargill City	15	Southland Region	2.15398e+06	5.41397e+06	1	3123700	1	897	52	1
3122500	60	610700	Rosedale	7599	Area Outside Ward	75	Invercargill City	15	Southland Region	2.15432e+06	5.41399e+06	1	3122500	3	923	20	1
3122800	114	610700	Rosedale	7599	Area Outside Ward	75	Invercargill City	15	Southland Region	2.15487e+06	5.41397e+06	1	3122800	4	947	40	2
3123500	129	610700	Rosedale	7599	Area Outside Ward	75	Invercargill City	15	Southland Region	2.15332e+06	5.41393e+06	1	3123500	4	938	45	2
2729200	162	597850	Hampstead	6303	Ashburton Ward	63	Ashburton District	13	Canterbury Region	2.40999e+06	5.69839e+06	1	2729200	4	947	57	2
894700	66	530200	Hamilton East	1603	South Ward	16	Hamilton City	03	Waikato Region	2.7118e+06	6.37697e+06	1	894700	8	1056	30	3
2729300	6	597840	Ashburton Central East	6303	Ashburton Ward	63	Ashburton District	13	Canterbury Region	2.4098e+06	5.69979e+06	1	2729300	6	976	2	2
107903	159	503800	Raumanga West	205	Okara Ward	2	Whangarei District	01	Northland Region	2.62907e+06	6.60405e+06	1	107903	10	1154	72	3
2792600	3	599500	Seaview	6404	Timaru Ward	64	Timaru District	13	Canterbury Region	2.37053e+06	5.64454e+06	1	2792600	8	1061	1	3
894800	24	530200	Hamilton East	1603	South Ward	16	Hamilton City	03	Waikato Region	2.7119e+06	6.37678e+06	1	894800	8	1056	11	3
763100	63	525201	Clevedon	807	Botany-Clevedon Ward	8	Manukau City	02	Auckland Region	2.69171e+06	6.46552e+06	1	763100	2	908	21	1
108800	96	503500	Raumanga East	205	Okara Ward	2	Whangarei District	01	Northland Region	2.62911e+06	6.60545e+06	1	108800	10	1150	43	3
2730400	60	597840	Ashburton Central East	6303	Ashburton Ward	63	Ashburton District	13	Canterbury Region	2.40967e+06	5.69903e+06	1	2730400	7	1001	21	2
1503600	135	548300	Akina	3005	Hastings Ward	30	Hastings District	06	Hawke's Bay Region	2.83974e+06	6.16587e+06	1	1503600	9	1082	61	3
107905	222	503800	Raumanga West	205	Okara Ward	2	Whangarei District	01	Northland Region	2.62915e+06	6.6042e+06	1	107905	10	1342	100	3
108400	183	503500	Raumanga East	205	Okara Ward	2	Whangarei District	01	Northland Region	2.62883e+06	6.60558e+06	1	108400	9	1105	82	3
894500	120	530100	Peachgrove	1603	South Ward	16	Hamilton City	03	Waikato Region	2.7117e+06	6.37722e+06	1	894500	8	1056	54	3
3123200	159	610700	Rosedale	7599	Area Outside Ward	75	Invercargill City	15	Southland Region	2.15484e+06	5.41385e+06	1	3123200	3	928	52	1
3123400	30	610700	Rosedale	7599	Area Outside Ward	75	Invercargill City	15	Southland Region	2.15515e+06	5.41386e+06	1	3123400	2	911	10	1
3123100	66	610700	Rosedale	7599	Area Outside Ward	75	Invercargill City	15	Southland Region	2.15457e+06	5.41381e+06	1	3123100	3	927	22	1
2728000	60	597820	Ashburton Central West	6303	Ashburton Ward	63	Ashburton District	13	Canterbury Region	2.40947e+06	5.69991e+06	1	2728000	3	925	20	1
106700	138	503400	Maunu	205	Okara Ward	2	Whangarei District	01	Northland Region	2.62757e+06	6.60592e+06	1	106700	3	920	46	1
1590600	24	551800	New Plymouth Central	3301	New Plymouth City Ward	33	New Plymouth District	07	Taranaki Region	2.60244e+06	6.23816e+06	1	1590600	6	991	8	2
106400	12	503400	Maunu	205	Okara Ward	2	Whangarei District	01	Northland Region	2.62671e+06	6.60612e+06	1	106400	3	920	4	1
106600	126	503400	Maunu	205	Okara Ward	2	Whangarei District	01	Northland Region	2.62686e+06	6.60596e+06	1	106600	4	945	44	2
2728500	63	597840	Ashburton Central East	6303	Ashburton Ward	63	Ashburton District	13	Canterbury Region	2.40934e+06	5.69902e+06	1	2728500	9	1125	28	3
2728400	24	597840	Ashburton Central East	6303	Ashburton Ward	63	Ashburton District	13	Canterbury Region	2.40919e+06	5.69899e+06	1	2728400	9	1125	11	3
107000	144	503400	Maunu	205	Okara Ward	2	Whangarei District	01	Northland Region	2.62648e+06	6.60565e+06	1	107000	1	881	48	1
106801	99	503400	Maunu	205	Okara Ward	2	Whangarei District	01	Northland Region	2.62716e+06	6.60587e+06	1	106801	2	903	33	1
2728800	156	597850	Hampstead	6303	Ashburton Ward	63	Ashburton District	13	Canterbury Region	2.40972e+06	5.69872e+06	1	2728800	10	1176	70	3
2728900	72	597850	Hampstead	6303	Ashburton Ward	63	Ashburton District	13	Canterbury Region	2.40959e+06	5.69859e+06	1	2728900	8	1056	32	3
106900	150	503400	Maunu	205	Okara Ward	2	Whangarei District	01	Northland Region	2.62673e+06	6.60585e+06	1	106900	5	958	52	2
3124200	66	610700	Rosedale	7599	Area Outside Ward	75	Invercargill City	15	Southland Region	2.15419e+06	5.41398e+06	1	3124200	2	914	22	1
2470400	36	590701	Mona Vale	6004	Riccarton-Wigram Ward	60	Christchurch City	13	Canterbury Region	2.47754e+06	5.74206e+06	1	2470400	5	956	13	2
2732400	33	597840	Ashburton Central East	6303	Ashburton Ward	63	Ashburton District	13	Canterbury Region	2.41015e+06	5.70011e+06	1	2732400	7	1028	12	2
2732200	69	597830	Netherby	6303	Ashburton Ward	63	Ashburton District	13	Canterbury Region	2.41041e+06	5.70023e+06	1	2732200	7	1028	24	2
2732300	33	597830	Netherby	6303	Ashburton Ward	63	Ashburton District	13	Canterbury Region	2.41036e+06	5.70007e+06	1	2732300	7	1028	12	2
2732500	45	597840	Ashburton Central East	6303	Ashburton Ward	63	Ashburton District	13	Canterbury Region	2.41007e+06	5.70004e+06	1	2732500	8	1039	20	3
896200	72	530200	Hamilton East	1603	South Ward	16	Hamilton City	03	Waikato Region	2.71205e+06	6.37699e+06	1	896200	9	1091	32	3
3124700	72	610900	Windsor	7599	Area Outside Ward	75	Invercargill City	15	Southland Region	2.15367e+06	5.4135e+06	1	3124700	5	969	25	2
3124800	84	610900	Windsor	7599	Area Outside Ward	75	Invercargill City	15	Southland Region	2.15402e+06	5.41352e+06	1	3124800	4	948	29	2
3124600	72	610900	Windsor	7599	Area Outside Ward	75	Invercargill City	15	Southland Region	2.15334e+06	5.41348e+06	1	3124600	4	948	25	2
2731100	90	597850	Hampstead	6303	Ashburton Ward	63	Ashburton District	13	Canterbury Region	2.40988e+06	5.69882e+06	1	2731100	8	1043	40	3
3125000	81	610900	Windsor	7599	Area Outside Ward	75	Invercargill City	15	Southland Region	2.15335e+06	5.41338e+06	1	3125000	8	1047	36	3
108700	96	503500	Raumanga East	205	Okara Ward	2	Whangarei District	01	Northland Region	2.62922e+06	6.6056e+06	1	108700	10	1173	43	3
108300	249	503500	Raumanga East	205	Okara Ward	2	Whangarei District	01	Northland Region	2.62927e+06	6.60598e+06	1	108300	10	1139	112	3
3123900	99	610700	Rosedale	7599	Area Outside Ward	75	Invercargill City	15	Southland Region	2.15373e+06	5.41374e+06	1	3123900	6	992	35	2
3124100	57	610700	Rosedale	7599	Area Outside Ward	75	Invercargill City	15	Southland Region	2.15421e+06	5.41378e+06	1	3124100	2	914	19	1
3124000	156	610700	Rosedale	7599	Area Outside Ward	75	Invercargill City	15	Southland Region	2.15398e+06	5.41377e+06	1	3124000	1	889	51	1
3122900	69	610700	Rosedale	7599	Area Outside Ward	75	Invercargill City	15	Southland Region	2.15433e+06	5.4138e+06	1	3122900	3	927	23	1
3123000	60	610700	Rosedale	7599	Area Outside Ward	75	Invercargill City	15	Southland Region	2.15445e+06	5.4138e+06	1	3123000	3	927	20	1
3123800	141	610700	Rosedale	7599	Area Outside Ward	75	Invercargill City	15	Southland Region	2.15334e+06	5.41373e+06	1	3123800	1	882	47	1
3123300	87	610700	Rosedale	7599	Area Outside Ward	75	Invercargill City	15	Southland Region	2.15498e+06	5.41378e+06	1	3123300	2	911	29	1
894400	156	530100	Peachgrove	1603	South Ward	16	Hamilton City	03	Waikato Region	2.71167e+06	6.37743e+06	1	894400	9	1115	70	3
108200	123	503500	Raumanga East	205	Okara Ward	2	Whangarei District	01	Northland Region	2.62901e+06	6.60588e+06	1	108200	10	1245	55	3
2729900	3	597840	Ashburton Central East	6303	Ashburton Ward	63	Ashburton District	13	Canterbury Region	2.40943e+06	5.69951e+06	1	2729900	8	1051	1	3
108000	276	503500	Raumanga East	205	Okara Ward	2	Whangarei District	01	Northland Region	2.6288e+06	6.60603e+06	1	108000	10	1248	124	3
109104	21	503900	Port-Limeburners	205	Okara Ward	2	Whangarei District	01	Northland Region	2.6294e+06	6.60443e+06	1	109104	8	1061	9	3
109102	129	503500	Raumanga East	205	Okara Ward	2	Whangarei District	01	Northland Region	2.62925e+06	6.60522e+06	1	109102	10	1230	58	3
894600	132	530100	Peachgrove	1603	South Ward	16	Hamilton City	03	Waikato Region	2.71183e+06	6.3773e+06	1	894600	8	1054	59	3
894300	285	530100	Peachgrove	1603	South Ward	16	Hamilton City	03	Waikato Region	2.71154e+06	6.37718e+06	1	894300	9	1083	128	3
3122700	153	610700	Rosedale	7599	Area Outside Ward	75	Invercargill City	15	Southland Region	2.15489e+06	5.41406e+06	1	3122700	2	917	50	1
3122600	114	610700	Rosedale	7599	Area Outside Ward	75	Invercargill City	15	Southland Region	2.15449e+06	5.41399e+06	1	3122600	3	923	38	1
109000	93	503500	Raumanga East	205	Okara Ward	2	Whangarei District	01	Northland Region	2.62928e+06	6.60548e+06	1	109000	10	1173	42	3
1423000	96	546802	Bluff Hill	3199	Area Outside Ward	31	Napier City	06	Hawke's Bay Region	2.84662e+06	6.18348e+06	1	1423000	6	994	34	2
1422900	144	546802	Bluff Hill	3199	Area Outside Ward	31	Napier City	06	Hawke's Bay Region	2.84654e+06	6.18343e+06	1	1422900	7	1013	50	2
1423300	57	546802	Bluff Hill	3199	Area Outside Ward	31	Napier City	06	Hawke's Bay Region	2.84646e+06	6.18331e+06	1	1423300	5	959	20	2
1423500	9	546802	Bluff Hill	3199	Area Outside Ward	31	Napier City	06	Hawke's Bay Region	2.84695e+06	6.18325e+06	1	1423500	6	982	3	2
2734100	96	597810	Allenton	6303	Ashburton Ward	63	Ashburton District	13	Canterbury Region	2.41075e+06	5.70101e+06	1	2734100	2	914	32	1
2734300	108	597830	Netherby	6303	Ashburton Ward	63	Ashburton District	13	Canterbury Region	2.41073e+06	5.70062e+06	1	2734300	6	990	38	2
2734200	21	597810	Allenton	6303	Ashburton Ward	63	Ashburton District	13	Canterbury Region	2.41047e+06	5.70078e+06	1	2734200	2	914	7	1
2472400	42	590701	Mona Vale	6004	Riccarton-Wigram Ward	60	Christchurch City	13	Canterbury Region	2.47774e+06	5.74209e+06	1	2472400	6	978	15	2
1423400	60	546802	Bluff Hill	3199	Area Outside Ward	31	Napier City	06	Hawke's Bay Region	2.84693e+06	6.18341e+06	1	1423400	6	982	21	2
1423600	111	546802	Bluff Hill	3199	Area Outside Ward	31	Napier City	06	Hawke's Bay Region	2.84659e+06	6.18321e+06	1	1423600	6	982	39	2
2470500	60	590701	Mona Vale	6004	Riccarton-Wigram Ward	60	Christchurch City	13	Canterbury Region	2.47755e+06	5.74196e+06	1	2470500	5	956	21	2
2470300	138	590701	Mona Vale	6004	Riccarton-Wigram Ward	60	Christchurch City	13	Canterbury Region	2.4773e+06	5.74191e+06	1	2470300	5	957	48	2
2732600	102	597840	Ashburton Central East	6303	Ashburton Ward	63	Ashburton District	13	Canterbury Region	2.40994e+06	5.69989e+06	1	2732600	8	1039	46	3
3124400	78	610900	Windsor	7599	Area Outside Ward	75	Invercargill City	15	Southland Region	2.15372e+06	5.41359e+06	1	3124400	2	902	26	1
3124300	75	610900	Windsor	7599	Area Outside Ward	75	Invercargill City	15	Southland Region	2.15335e+06	5.41358e+06	1	3124300	2	917	25	1
3124900	63	610900	Windsor	7599	Area Outside Ward	75	Invercargill City	15	Southland Region	2.15422e+06	5.41359e+06	1	3124900	5	969	22	2
3124500	87	610900	Windsor	7599	Area Outside Ward	75	Invercargill City	15	Southland Region	2.15401e+06	5.41361e+06	1	3124500	2	902	29	1
896800	192	530200	Hamilton East	1603	South Ward	16	Hamilton City	03	Waikato Region	2.71213e+06	6.37681e+06	1	896800	7	1027	67	2
3125100	75	610900	Windsor	7599	Area Outside Ward	75	Invercargill City	15	Southland Region	2.15369e+06	5.4134e+06	1	3125100	4	950	26	2
3125200	123	610900	Windsor	7599	Area Outside Ward	75	Invercargill City	15	Southland Region	2.15406e+06	5.41342e+06	1	3125200	1	890	41	1
2443200	204	586306	Rangiora North	5903	Rangiora Ward	59	Waimakariri District	13	Canterbury Region	2.47658e+06	5.76731e+06	1	2443200	5	957	71	2
2472600	96	590701	Mona Vale	6004	Riccarton-Wigram Ward	60	Christchurch City	13	Canterbury Region	2.47775e+06	5.74198e+06	1	2472600	6	978	34	2
1424000	15	546802	Bluff Hill	3199	Area Outside Ward	31	Napier City	06	Hawke's Bay Region	2.84682e+06	6.18311e+06	1	1424000	7	1002	5	2
3129000	63	611001	Waverley-Glengarry	7599	Area Outside Ward	75	Invercargill City	15	Southland Region	2.15511e+06	5.41358e+06	1	3129000	7	1005	22	2
3129100	18	611001	Waverley-Glengarry	7599	Area Outside Ward	75	Invercargill City	15	Southland Region	2.15527e+06	5.41364e+06	1	3129100	7	1005	6	2
3128900	90	611001	Waverley-Glengarry	7599	Area Outside Ward	75	Invercargill City	15	Southland Region	2.15496e+06	5.41359e+06	1	3128900	4	942	31	2
2735101	171	597810	Allenton	6303	Ashburton Ward	63	Ashburton District	13	Canterbury Region	2.41022e+06	5.70091e+06	1	2735101	1	883	56	1
2473000	96	590800	Riccarton	6004	Riccarton-Wigram Ward	60	Christchurch City	13	Canterbury Region	2.47779e+06	5.74168e+06	1	2473000	6	996	34	2
2735102	168	597810	Allenton	6303	Ashburton Ward	63	Ashburton District	13	Canterbury Region	2.41003e+06	5.70069e+06	1	2735102	2	907	55	1
2735200	216	597810	Allenton	6303	Ashburton Ward	63	Ashburton District	13	Canterbury Region	2.40994e+06	5.70057e+06	1	2735200	4	938	76	2
171804	204	505805	Orewa	403	Eastern Ward	4	Rodney District	02	Auckland Region	2.66172e+06	6.51119e+06	1	171804	6	976	71	2
2472700	54	590701	Mona Vale	6004	Riccarton-Wigram Ward	60	Christchurch City	13	Canterbury Region	2.47792e+06	5.74199e+06	1	2472700	6	978	19	2
2472200	126	590701	Mona Vale	6004	Riccarton-Wigram Ward	60	Christchurch City	13	Canterbury Region	2.47799e+06	5.74226e+06	1	2472200	2	913	42	1
2734700	261	597810	Allenton	6303	Ashburton Ward	63	Ashburton District	13	Canterbury Region	2.41027e+06	5.70151e+06	1	2734700	3	922	86	1
2734000	162	597810	Allenton	6303	Ashburton Ward	63	Ashburton District	13	Canterbury Region	2.41052e+06	5.70112e+06	1	2734000	7	1024	57	2
2472000	90	590701	Mona Vale	6004	Riccarton-Wigram Ward	60	Christchurch City	13	Canterbury Region	2.47797e+06	5.7424e+06	1	2472000	2	904	30	1
898207	162	528310	Bryant	1601	West Ward	16	Hamilton City	03	Waikato Region	2.70912e+06	6.3815e+06	1	898207	2	903	53	1
1423100	54	546802	Bluff Hill	3199	Area Outside Ward	31	Napier City	06	Hawke's Bay Region	2.84669e+06	6.18354e+06	1	1423100	6	994	19	2
1684801	33	558200	Marybank-Gordon Park	3702	Urban Ward	37	Wanganui District	08	Manawatu-Wanganui Region	2.68725e+06	6.14304e+06	1	1684801	5	972	12	2
2734600	159	597830	Netherby	6303	Ashburton Ward	63	Ashburton District	13	Canterbury Region	2.41052e+06	5.7003e+06	1	2734600	6	996	56	2
2734400	120	597830	Netherby	6303	Ashburton Ward	63	Ashburton District	13	Canterbury Region	2.41061e+06	5.70048e+06	1	2734400	4	949	42	2
1688800	135	557600	Wembley Park	3702	Urban Ward	37	Wanganui District	08	Manawatu-Wanganui Region	2.68655e+06	6.14242e+06	1	1688800	10	1225	61	3
1688900	69	557600	Wembley Park	3702	Urban Ward	37	Wanganui District	08	Manawatu-Wanganui Region	2.68675e+06	6.1425e+06	1	1688900	10	1297	31	3
1689500	219	557600	Wembley Park	3702	Urban Ward	37	Wanganui District	08	Manawatu-Wanganui Region	2.68692e+06	6.14238e+06	1	1689500	10	1210	99	3
1557809	186	551022	Highlands Park	3301	New Plymouth City Ward	33	New Plymouth District	07	Taranaki Region	2.60513e+06	6.23512e+06	1	1557809	2	908	61	1
1556804	12	552500	Struan Park	3301	New Plymouth City Ward	33	New Plymouth District	07	Taranaki Region	2.6043e+06	6.23526e+06	1	1556804	3	922	4	1
3129700	75	611001	Waverley-Glengarry	7599	Area Outside Ward	75	Invercargill City	15	Southland Region	2.15482e+06	5.41349e+06	1	3129700	7	1008	26	2
1556805	18	551021	Carrington	3301	New Plymouth City Ward	33	New Plymouth District	07	Taranaki Region	2.60447e+06	6.23575e+06	1	1556805	3	922	6	1
1557902	27	551021	Carrington	3301	New Plymouth City Ward	33	New Plymouth District	07	Taranaki Region	2.60492e+06	6.2351e+06	1	1557902	2	902	9	1
1165300	117	538201	Tauranga Central	2303	Te Papa-Welcome Bay Ward	23	Tauranga City	04	Bay of Plenty Region	2.7895e+06	6.38536e+06	1	1165300	6	992	41	2
1689100	54	557600	Wembley Park	3702	Urban Ward	37	Wanganui District	08	Manawatu-Wanganui Region	2.68677e+06	6.14231e+06	1	1689100	10	1261	24	3
1689000	93	557600	Wembley Park	3702	Urban Ward	37	Wanganui District	08	Manawatu-Wanganui Region	2.68661e+06	6.14232e+06	1	1689000	9	1095	42	3
1423900	12	546802	Bluff Hill	3199	Area Outside Ward	31	Napier City	06	Hawke's Bay Region	2.84694e+06	6.18315e+06	1	1423900	7	1002	4	2
2734900	120	597810	Allenton	6303	Ashburton Ward	63	Ashburton District	13	Canterbury Region	2.41045e+06	5.70128e+06	1	2734900	7	1006	42	2
1424100	18	546802	Bluff Hill	3199	Area Outside Ward	31	Napier City	06	Hawke's Bay Region	2.84666e+06	6.18307e+06	1	1424100	7	1002	6	2
3128600	57	611001	Waverley-Glengarry	7599	Area Outside Ward	75	Invercargill City	15	Southland Region	2.15446e+06	5.4136e+06	1	3128600	4	943	20	2
3128500	57	611001	Waverley-Glengarry	7599	Area Outside Ward	75	Invercargill City	15	Southland Region	2.15434e+06	5.41359e+06	1	3128500	4	943	20	2
3128800	54	611001	Waverley-Glengarry	7599	Area Outside Ward	75	Invercargill City	15	Southland Region	2.15471e+06	5.41361e+06	1	3128800	4	942	19	2
3128700	57	611001	Waverley-Glengarry	7599	Area Outside Ward	75	Invercargill City	15	Southland Region	2.15458e+06	5.4136e+06	1	3128700	4	943	20	2
3129300	66	611001	Waverley-Glengarry	7599	Area Outside Ward	75	Invercargill City	15	Southland Region	2.15435e+06	5.41338e+06	1	3129300	2	914	22	1
3129400	54	611001	Waverley-Glengarry	7599	Area Outside Ward	75	Invercargill City	15	Southland Region	2.15447e+06	5.4134e+06	1	3129400	2	914	18	1
2472900	81	590800	Riccarton	6004	Riccarton-Wigram Ward	60	Christchurch City	13	Canterbury Region	2.47765e+06	5.74168e+06	1	2472900	8	1040	36	3
2472500	150	590701	Mona Vale	6004	Riccarton-Wigram Ward	60	Christchurch City	13	Canterbury Region	2.47801e+06	5.7421e+06	1	2472500	5	964	52	2
1690800	159	557500	Williams Domain	3702	Urban Ward	37	Wanganui District	08	Manawatu-Wanganui Region	2.68623e+06	6.14135e+06	1	1690800	8	1062	72	3
2739700	135	597860	Tinwald	6303	Ashburton Ward	63	Ashburton District	13	Canterbury Region	2.40745e+06	5.69821e+06	1	2739700	7	1026	47	2
2739600	63	597860	Tinwald	6303	Ashburton Ward	63	Ashburton District	13	Canterbury Region	2.40807e+06	5.69836e+06	1	2739600	6	983	22	2
2739900	120	597860	Tinwald	6303	Ashburton Ward	63	Ashburton District	13	Canterbury Region	2.40785e+06	5.69819e+06	1	2739900	6	983	42	2
172604	189	505802	Red Beach	403	Eastern Ward	4	Rodney District	02	Auckland Region	2.66126e+06	6.50925e+06	1	172604	1	894	62	1
1166000	132	538201	Tauranga Central	2303	Te Papa-Welcome Bay Ward	23	Tauranga City	04	Bay of Plenty Region	2.78891e+06	6.38515e+06	1	1166000	6	978	46	2
1165400	60	538201	Tauranga Central	2303	Te Papa-Welcome Bay Ward	23	Tauranga City	04	Bay of Plenty Region	2.7894e+06	6.38528e+06	1	1165400	4	944	21	2
1165500	117	538201	Tauranga Central	2303	Te Papa-Welcome Bay Ward	23	Tauranga City	04	Bay of Plenty Region	2.78902e+06	6.38528e+06	1	1165500	6	985	41	2
1559400	33	551012	Glen Avon	3301	New Plymouth City Ward	33	New Plymouth District	07	Taranaki Region	2.60703e+06	6.23913e+06	1	1559400	6	989	12	2
1691000	72	557500	Williams Domain	3702	Urban Ward	37	Wanganui District	08	Manawatu-Wanganui Region	2.68648e+06	6.14115e+06	1	1691000	7	1015	25	2
1690900	60	557500	Williams Domain	3702	Urban Ward	37	Wanganui District	08	Manawatu-Wanganui Region	2.6862e+06	6.14116e+06	1	1690900	9	1076	27	3
2738900	36	597820	Ashburton Central West	6303	Ashburton Ward	63	Ashburton District	13	Canterbury Region	2.40896e+06	5.69967e+06	1	2738900	9	1125	16	3
2739000	15	597820	Ashburton Central West	6303	Ashburton Ward	63	Ashburton District	13	Canterbury Region	2.40929e+06	5.69972e+06	1	2739000	9	1125	7	3
1165700	45	538201	Tauranga Central	2303	Te Papa-Welcome Bay Ward	23	Tauranga City	04	Bay of Plenty Region	2.78937e+06	6.38505e+06	1	1165700	4	944	16	2
1559500	15	551012	Glen Avon	3301	New Plymouth City Ward	33	New Plymouth District	07	Taranaki Region	2.60608e+06	6.2388e+06	1	1559500	6	984	5	2
1558900	3	551012	Glen Avon	3301	New Plymouth City Ward	33	New Plymouth District	07	Taranaki Region	2.60659e+06	6.23926e+06	1	1558900	6	989	1	2
1428800	9	546901	Nelson Park	3199	Area Outside Ward	31	Napier City	06	Hawke's Bay Region	2.847e+06	6.18304e+06	1	1428800	9	1118	4	3
1689900	90	557600	Wembley Park	3702	Urban Ward	37	Wanganui District	08	Manawatu-Wanganui Region	2.6865e+06	6.14191e+06	1	1689900	10	1250	40	3
1689700	117	557600	Wembley Park	3702	Urban Ward	37	Wanganui District	08	Manawatu-Wanganui Region	2.68643e+06	6.14201e+06	1	1689700	9	1090	53	3
1559600	12	551012	Glen Avon	3301	New Plymouth City Ward	33	New Plymouth District	07	Taranaki Region	2.60612e+06	6.23868e+06	1	1559600	6	984	4	2
1428700	15	546901	Nelson Park	3199	Area Outside Ward	31	Napier City	06	Hawke's Bay Region	2.84686e+06	6.18293e+06	1	1428700	9	1118	7	3
1428300	6	546901	Nelson Park	3199	Area Outside Ward	31	Napier City	06	Hawke's Bay Region	2.84667e+06	6.18299e+06	1	1428300	9	1118	3	3
1690100	78	557600	Wembley Park	3702	Urban Ward	37	Wanganui District	08	Manawatu-Wanganui Region	2.68674e+06	6.14172e+06	1	1690100	8	1048	35	3
1690600	21	557500	Williams Domain	3702	Urban Ward	37	Wanganui District	08	Manawatu-Wanganui Region	2.68645e+06	6.14162e+06	1	1690600	9	1076	9	3
1689800	21	557600	Wembley Park	3702	Urban Ward	37	Wanganui District	08	Manawatu-Wanganui Region	2.68627e+06	6.14187e+06	1	1689800	9	1090	9	3
2739301	138	597860	Tinwald	6303	Ashburton Ward	63	Ashburton District	13	Canterbury Region	2.40787e+06	5.69872e+06	1	2739301	3	925	46	1
1559800	99	551012	Glen Avon	3301	New Plymouth City Ward	33	New Plymouth District	07	Taranaki Region	2.60601e+06	6.23842e+06	1	1559800	6	975	35	2
1691300	243	557500	Williams Domain	3702	Urban Ward	37	Wanganui District	08	Manawatu-Wanganui Region	2.68681e+06	6.1414e+06	1	1691300	9	1076	109	3
1690700	24	557500	Williams Domain	3702	Urban Ward	37	Wanganui District	08	Manawatu-Wanganui Region	2.68629e+06	6.14139e+06	1	1690700	9	1076	11	3
1691200	147	557500	Williams Domain	3702	Urban Ward	37	Wanganui District	08	Manawatu-Wanganui Region	2.68665e+06	6.14147e+06	1	1691200	9	1076	66	3
1559302	3	551012	Glen Avon	3301	New Plymouth City Ward	33	New Plymouth District	07	Taranaki Region	2.60756e+06	6.23966e+06	1	1559302	6	989	1	2
1689600	153	557600	Wembley Park	3702	Urban Ward	37	Wanganui District	08	Manawatu-Wanganui Region	2.68672e+06	6.1421e+06	1	1689600	10	1261	69	3
1556806	147	552200	Welbourn	3301	New Plymouth City Ward	33	New Plymouth District	07	Taranaki Region	2.60444e+06	6.23589e+06	1	1556806	4	940	51	2
1557806	120	551022	Highlands Park	3301	New Plymouth City Ward	33	New Plymouth District	07	Taranaki Region	2.60523e+06	6.23509e+06	1	1557806	1	898	40	1
1557905	6	551021	Carrington	3301	New Plymouth City Ward	33	New Plymouth District	07	Taranaki Region	2.60467e+06	6.23581e+06	1	1557905	2	902	2	1
1557904	15	551022	Highlands Park	3301	New Plymouth City Ward	33	New Plymouth District	07	Taranaki Region	2.6049e+06	6.23578e+06	1	1557904	2	902	5	1
3129500	69	611001	Waverley-Glengarry	7599	Area Outside Ward	75	Invercargill City	15	Southland Region	2.15459e+06	5.41341e+06	1	3129500	8	1070	31	3
3129600	81	611001	Waverley-Glengarry	7599	Area Outside Ward	75	Invercargill City	15	Southland Region	2.15471e+06	5.4134e+06	1	3129600	7	1008	28	2
1165200	69	538201	Tauranga Central	2303	Te Papa-Welcome Bay Ward	23	Tauranga City	04	Bay of Plenty Region	2.7891e+06	6.38543e+06	1	1165200	4	944	24	2
1429700	21	546901	Nelson Park	3199	Area Outside Ward	31	Napier City	06	Hawke's Bay Region	2.84653e+06	6.1825e+06	1	1429700	9	1074	9	3
1693000	102	557700	Kowhai Park	3702	Urban Ward	37	Wanganui District	08	Manawatu-Wanganui Region	2.6859e+06	6.14061e+06	1	1693000	6	979	36	2
1692100	96	557500	Williams Domain	3702	Urban Ward	37	Wanganui District	08	Manawatu-Wanganui Region	2.6861e+06	6.14135e+06	1	1692100	5	970	34	2
1430700	222	546901	Nelson Park	3199	Area Outside Ward	31	Napier City	06	Hawke's Bay Region	2.84632e+06	6.18233e+06	1	1430700	6	989	78	2
1430300	75	546901	Nelson Park	3199	Area Outside Ward	31	Napier City	06	Hawke's Bay Region	2.8468e+06	6.18238e+06	1	1430300	9	1083	34	3
1692800	144	557700	Kowhai Park	3702	Urban Ward	37	Wanganui District	08	Manawatu-Wanganui Region	2.68604e+06	6.14088e+06	1	1692800	9	1120	65	3
2741600	57	597860	Tinwald	6303	Ashburton Ward	63	Ashburton District	13	Canterbury Region	2.40675e+06	5.69733e+06	1	2741600	4	943	20	2
1692700	60	557700	Kowhai Park	3702	Urban Ward	37	Wanganui District	08	Manawatu-Wanganui Region	2.68625e+06	6.14092e+06	1	1692700	8	1041	27	3
1430800	243	546901	Nelson Park	3199	Area Outside Ward	31	Napier City	06	Hawke's Bay Region	2.84634e+06	6.18251e+06	1	1430800	10	1189	109	3
1693100	87	557700	Kowhai Park	3702	Urban Ward	37	Wanganui District	08	Manawatu-Wanganui Region	2.68609e+06	6.14054e+06	1	1693100	10	1169	39	3
1691100	78	557500	Williams Domain	3702	Urban Ward	37	Wanganui District	08	Manawatu-Wanganui Region	2.68656e+06	6.14128e+06	1	1691100	7	1015	27	2
1690000	69	557600	Wembley Park	3702	Urban Ward	37	Wanganui District	08	Manawatu-Wanganui Region	2.68661e+06	6.14183e+06	1	1690000	8	1048	31	3
2740800	3	597860	Tinwald	6303	Ashburton Ward	63	Ashburton District	13	Canterbury Region	2.40723e+06	5.69774e+06	1	2740800	6	985	1	2
2740300	78	597860	Tinwald	6303	Ashburton Ward	63	Ashburton District	13	Canterbury Region	2.40775e+06	5.69785e+06	1	2740300	2	917	26	1
2740700	81	597860	Tinwald	6303	Ashburton Ward	63	Ashburton District	13	Canterbury Region	2.40744e+06	5.69784e+06	1	2740700	6	985	28	2
2740600	159	597860	Tinwald	6303	Ashburton Ward	63	Ashburton District	13	Canterbury Region	2.40689e+06	5.69784e+06	1	2740600	7	1016	56	2
2740500	96	597860	Tinwald	6303	Ashburton Ward	63	Ashburton District	13	Canterbury Region	2.40721e+06	5.69801e+06	1	2740500	6	985	34	2
2740100	138	597860	Tinwald	6303	Ashburton Ward	63	Ashburton District	13	Canterbury Region	2.40763e+06	5.698e+06	1	2740100	6	977	48	2
2738800	105	597820	Ashburton Central West	6303	Ashburton Ward	63	Ashburton District	13	Canterbury Region	2.40913e+06	5.69984e+06	1	2738800	4	952	37	2
1165600	111	538201	Tauranga Central	2303	Te Papa-Welcome Bay Ward	23	Tauranga City	04	Bay of Plenty Region	2.78941e+06	6.38517e+06	1	1165600	6	998	39	2
2739100	3	597820	Ashburton Central West	6303	Ashburton Ward	63	Ashburton District	13	Canterbury Region	2.40911e+06	5.69955e+06	1	2739100	9	1125	1	3
1166100	225	538201	Tauranga Central	2303	Te Papa-Welcome Bay Ward	23	Tauranga City	04	Bay of Plenty Region	2.78929e+06	6.38494e+06	1	1166100	3	930	74	1
1428400	3	546901	Nelson Park	3199	Area Outside Ward	31	Napier City	06	Hawke's Bay Region	2.84684e+06	6.18304e+06	1	1428400	9	1118	1	3
2739303	186	597860	Tinwald	6303	Ashburton Ward	63	Ashburton District	13	Canterbury Region	2.40795e+06	5.69887e+06	1	2739303	2	902	61	1
1428600	9	546901	Nelson Park	3199	Area Outside Ward	31	Napier City	06	Hawke's Bay Region	2.84669e+06	6.18289e+06	1	1428600	9	1118	4	3
2739302	54	597860	Tinwald	6303	Ashburton Ward	63	Ashburton District	13	Canterbury Region	2.40802e+06	5.69868e+06	1	2739302	3	925	18	1
2739500	120	597860	Tinwald	6303	Ashburton Ward	63	Ashburton District	13	Canterbury Region	2.40779e+06	5.69852e+06	1	2739500	6	983	42	2
2739400	45	597860	Tinwald	6303	Ashburton Ward	63	Ashburton District	13	Canterbury Region	2.40829e+06	5.6985e+06	1	2739400	2	902	15	1
1431800	33	546901	Nelson Park	3199	Area Outside Ward	31	Napier City	06	Hawke's Bay Region	2.84697e+06	6.18276e+06	1	1431800	9	1083	15	3
1693200	54	557700	Kowhai Park	3702	Urban Ward	37	Wanganui District	08	Manawatu-Wanganui Region	2.68587e+06	6.1404e+06	1	1693200	6	979	19	2
1694700	93	557700	Kowhai Park	3702	Urban Ward	37	Wanganui District	08	Manawatu-Wanganui Region	2.68595e+06	6.14029e+06	1	1694700	5	970	33	2
1693500	63	557700	Kowhai Park	3702	Urban Ward	37	Wanganui District	08	Manawatu-Wanganui Region	2.68664e+06	6.14098e+06	1	1693500	9	1117	28	3
1693600	66	557700	Kowhai Park	3702	Urban Ward	37	Wanganui District	08	Manawatu-Wanganui Region	2.6865e+06	6.14089e+06	1	1693600	9	1117	30	3
2741800	117	597860	Tinwald	6303	Ashburton Ward	63	Ashburton District	13	Canterbury Region	2.40694e+06	5.6971e+06	1	2741800	4	943	41	2
1693700	117	557700	Kowhai Park	3702	Urban Ward	37	Wanganui District	08	Manawatu-Wanganui Region	2.68642e+06	6.1408e+06	1	1693700	10	1170	53	3
1693800	96	557700	Kowhai Park	3702	Urban Ward	37	Wanganui District	08	Manawatu-Wanganui Region	2.68632e+06	6.14071e+06	1	1693800	7	1005	34	2
515203	261	520801	Waiheke Island	707	Hauraki Gulf Islands Ward	7	Auckland City	02	Auckland Region	2.69345e+06	6.48811e+06	1	515203	8	1053	117	3
515202	183	520801	Waiheke Island	707	Hauraki Gulf Islands Ward	7	Auckland City	02	Auckland Region	2.69315e+06	6.48834e+06	1	515202	8	1031	82	3
1431300	51	546901	Nelson Park	3199	Area Outside Ward	31	Napier City	06	Hawke's Bay Region	2.84695e+06	6.18256e+06	1	1431300	9	1083	23	3
1694400	102	557700	Kowhai Park	3702	Urban Ward	37	Wanganui District	08	Manawatu-Wanganui Region	2.68633e+06	6.14048e+06	1	1694400	9	1115	46	3
1692600	117	557700	Kowhai Park	3702	Urban Ward	37	Wanganui District	08	Manawatu-Wanganui Region	2.68627e+06	6.14103e+06	1	1692600	8	1067	53	3
2741300	105	597860	Tinwald	6303	Ashburton Ward	63	Ashburton District	13	Canterbury Region	2.40691e+06	5.69744e+06	1	2741300	7	1010	37	2
2741000	72	597860	Tinwald	6303	Ashburton Ward	63	Ashburton District	13	Canterbury Region	2.40708e+06	5.69758e+06	1	2741000	7	1000	25	2
2741100	39	597860	Tinwald	6303	Ashburton Ward	63	Ashburton District	13	Canterbury Region	2.40731e+06	5.69766e+06	1	2741100	7	1000	14	2
1691800	93	557500	Williams Domain	3702	Urban Ward	37	Wanganui District	08	Manawatu-Wanganui Region	2.68619e+06	6.1416e+06	1	1691800	9	1082	42	3
1200100	204	536821	Omanu	2301	Mount Maunganui-Papamoa Ward	23	Tauranga City	04	Bay of Plenty Region	2.79344e+06	6.38809e+06	1	1200100	7	1006	71	2
1695500	78	557900	Durie Hill	3702	Urban Ward	37	Wanganui District	08	Manawatu-Wanganui Region	2.68612e+06	6.13921e+06	1	1695500	3	923	26	1
909900	57	529700	Hamilton Central	1601	West Ward	16	Hamilton City	03	Waikato Region	2.71099e+06	6.37759e+06	1	909900	8	1033	26	3
1694600	30	557700	Kowhai Park	3702	Urban Ward	37	Wanganui District	08	Manawatu-Wanganui Region	2.68612e+06	6.14034e+06	1	1694600	5	970	10	2
1694500	18	557700	Kowhai Park	3702	Urban Ward	37	Wanganui District	08	Manawatu-Wanganui Region	2.68635e+06	6.14034e+06	1	1694500	5	970	6	2
1694900	108	557800	Bastia Hill	3702	Urban Ward	37	Wanganui District	08	Manawatu-Wanganui Region	2.6864e+06	6.14023e+06	1	1694900	4	936	38	2
1431200	156	546901	Nelson Park	3199	Area Outside Ward	31	Napier City	06	Hawke's Bay Region	2.84654e+06	6.18229e+06	1	1431200	5	961	55	2
1431400	21	546901	Nelson Park	3199	Area Outside Ward	31	Napier City	06	Hawke's Bay Region	2.84691e+06	6.18235e+06	1	1431400	9	1110	9	3
1694800	102	557700	Kowhai Park	3702	Urban Ward	37	Wanganui District	08	Manawatu-Wanganui Region	2.68601e+06	6.14008e+06	1	1694800	5	969	36	2
1431900	3	546901	Nelson Park	3199	Area Outside Ward	31	Napier City	06	Hawke's Bay Region	2.84699e+06	6.18286e+06	1	1431900	9	1083	1	3
1693900	99	557700	Kowhai Park	3702	Urban Ward	37	Wanganui District	08	Manawatu-Wanganui Region	2.68621e+06	6.14066e+06	1	1693900	8	1047	45	3
1698300	18	557100	Cooks Gardens	3702	Urban Ward	37	Wanganui District	08	Manawatu-Wanganui Region	2.68555e+06	6.13917e+06	1	1698300	9	1075	8	3
1566300	105	552500	Struan Park	3301	New Plymouth City Ward	33	New Plymouth District	07	Taranaki Region	2.6039e+06	6.23539e+06	1	1566300	8	1037	47	3
1566200	45	552500	Struan Park	3301	New Plymouth City Ward	33	New Plymouth District	07	Taranaki Region	2.60354e+06	6.23544e+06	1	1566200	8	1037	20	3
1567500	126	552500	Struan Park	3301	New Plymouth City Ward	33	New Plymouth District	07	Taranaki Region	2.60354e+06	6.23657e+06	1	1567500	2	908	42	1
1697600	3	557100	Cooks Gardens	3702	Urban Ward	37	Wanganui District	08	Manawatu-Wanganui Region	2.6851e+06	6.13887e+06	1	1697600	9	1075	1	3
1698100	12	557100	Cooks Gardens	3702	Urban Ward	37	Wanganui District	08	Manawatu-Wanganui Region	2.68572e+06	6.13936e+06	1	1698100	9	1075	5	3
1698600	12	557100	Cooks Gardens	3702	Urban Ward	37	Wanganui District	08	Manawatu-Wanganui Region	2.68523e+06	6.13944e+06	1	1698600	9	1075	5	3
1565900	105	552500	Struan Park	3301	New Plymouth City Ward	33	New Plymouth District	07	Taranaki Region	2.6032e+06	6.23566e+06	1	1565900	2	911	35	1
1698200	30	557100	Cooks Gardens	3702	Urban Ward	37	Wanganui District	08	Manawatu-Wanganui Region	2.68565e+06	6.13924e+06	1	1698200	9	1131	14	3
1566100	102	552500	Struan Park	3301	New Plymouth City Ward	33	New Plymouth District	07	Taranaki Region	2.60371e+06	6.23548e+06	1	1566100	6	981	36	2
1566000	78	552500	Struan Park	3301	New Plymouth City Ward	33	New Plymouth District	07	Taranaki Region	2.6035e+06	6.23559e+06	1	1566000	2	911	26	1
912000	3	529700	Hamilton Central	1603	South Ward	16	Hamilton City	03	Waikato Region	2.71158e+06	6.37661e+06	1	912000	7	1002	1	2
912300	48	529700	Hamilton Central	1603	South Ward	16	Hamilton City	03	Waikato Region	2.71179e+06	6.37635e+06	1	912300	7	1003	17	2
1695000	96	557800	Bastia Hill	3702	Urban Ward	37	Wanganui District	08	Manawatu-Wanganui Region	2.6863e+06	6.14001e+06	1	1695000	2	914	32	1
909601	72	529700	Hamilton Central	1601	West Ward	16	Hamilton City	03	Waikato Region	2.71091e+06	6.37781e+06	1	909601	8	1033	32	3
515302	321	520801	Waiheke Island	707	Hauraki Gulf Islands Ward	7	Auckland City	02	Auckland Region	2.69295e+06	6.48747e+06	1	515302	8	1063	144	3
1700100	93	556900	Wanganui Central	3702	Urban Ward	37	Wanganui District	08	Manawatu-Wanganui Region	2.68529e+06	6.13983e+06	1	1700100	7	1029	33	2
1700000	54	556900	Wanganui Central	3702	Urban Ward	37	Wanganui District	08	Manawatu-Wanganui Region	2.68503e+06	6.13989e+06	1	1700000	8	1067	24	3
1699000	36	557100	Cooks Gardens	3702	Urban Ward	37	Wanganui District	08	Manawatu-Wanganui Region	2.68481e+06	6.13992e+06	1	1699000	8	1067	16	3
108600	117	503500	Raumanga East	205	Okara Ward	2	Whangarei District	01	Northland Region	2.62904e+06	6.6056e+06	1	108600	10	1150	53	3
2747800	33	597711	Fairton	6302	Rakaia Ward	63	Ashburton District	13	Canterbury Region	2.40979e+06	5.70213e+06	1	2747800	2	911	11	1
1305801	6	542410	Whakatane North	2502	Whakatane-Ohope Ward	25	Whakatane District	04	Bay of Plenty Region	2.86109e+06	6.35283e+06	1	1305801	2	913	2	1
1568300	123	552500	Struan Park	3301	New Plymouth City Ward	33	New Plymouth District	07	Taranaki Region	2.60367e+06	6.23591e+06	1	1568300	4	952	43	2
1569000	159	552500	Struan Park	3301	New Plymouth City Ward	33	New Plymouth District	07	Taranaki Region	2.60392e+06	6.23599e+06	1	1569000	6	990	56	2
1568700	63	552500	Struan Park	3301	New Plymouth City Ward	33	New Plymouth District	07	Taranaki Region	2.60369e+06	6.23643e+06	1	1568700	7	1013	22	2
1700600	87	556900	Wanganui Central	3702	Urban Ward	37	Wanganui District	08	Manawatu-Wanganui Region	2.68516e+06	6.14039e+06	1	1700600	10	1234	39	3
1568100	51	552500	Struan Park	3301	New Plymouth City Ward	33	New Plymouth District	07	Taranaki Region	2.60333e+06	6.23598e+06	1	1568100	4	948	18	2
1569200	87	552500	Struan Park	3301	New Plymouth City Ward	33	New Plymouth District	07	Taranaki Region	2.60418e+06	6.23583e+06	1	1569200	7	1004	30	2
1567700	75	552500	Struan Park	3301	New Plymouth City Ward	33	New Plymouth District	07	Taranaki Region	2.6036e+06	6.23634e+06	1	1567700	6	981	26	2
1699800	81	556900	Wanganui Central	3702	Urban Ward	37	Wanganui District	08	Manawatu-Wanganui Region	2.68486e+06	6.14003e+06	1	1699800	9	1103	36	3
1569300	129	552500	Struan Park	3301	New Plymouth City Ward	33	New Plymouth District	07	Taranaki Region	2.60408e+06	6.23563e+06	1	1569300	4	940	45	2
1568600	129	552500	Struan Park	3301	New Plymouth City Ward	33	New Plymouth District	07	Taranaki Region	2.60388e+06	6.23561e+06	1	1568600	3	934	43	1
1568800	117	552500	Struan Park	3301	New Plymouth City Ward	33	New Plymouth District	07	Taranaki Region	2.60383e+06	6.23621e+06	1	1568800	10	1168	53	3
1698800	6	557100	Cooks Gardens	3702	Urban Ward	37	Wanganui District	08	Manawatu-Wanganui Region	2.68527e+06	6.13905e+06	1	1698800	9	1075	3	3
1699100	6	557100	Cooks Gardens	3702	Urban Ward	37	Wanganui District	08	Manawatu-Wanganui Region	2.68497e+06	6.13978e+06	1	1699100	8	1067	3	3
1700200	42	556900	Wanganui Central	3702	Urban Ward	37	Wanganui District	08	Manawatu-Wanganui Region	2.68519e+06	6.13976e+06	1	1700200	8	1067	19	3
2748502	204	597712	Plains Railway	6301	Methven-Hinds Ward	63	Ashburton District	13	Canterbury Region	2.40703e+06	5.69932e+06	1	2748502	1	888	67	1
1699200	6	557100	Cooks Gardens	3702	Urban Ward	37	Wanganui District	08	Manawatu-Wanganui Region	2.68513e+06	6.13964e+06	1	1699200	8	1067	3	3
1697500	3	557100	Cooks Gardens	3702	Urban Ward	37	Wanganui District	08	Manawatu-Wanganui Region	2.68487e+06	6.139e+06	1	1697500	9	1075	1	3
1700300	15	556900	Wanganui Central	3702	Urban Ward	37	Wanganui District	08	Manawatu-Wanganui Region	2.6854e+06	6.13975e+06	1	1700300	7	1029	5	2
1697400	15	557100	Cooks Gardens	3702	Urban Ward	37	Wanganui District	08	Manawatu-Wanganui Region	2.68472e+06	6.13907e+06	1	1697400	8	1071	7	3
1697800	6	557100	Cooks Gardens	3702	Urban Ward	37	Wanganui District	08	Manawatu-Wanganui Region	2.68579e+06	6.1395e+06	1	1697800	9	1075	3	3
1697900	12	557100	Cooks Gardens	3702	Urban Ward	37	Wanganui District	08	Manawatu-Wanganui Region	2.6855e+06	6.13937e+06	1	1697900	9	1075	5	3
1305300	114	542410	Whakatane North	2502	Whakatane-Ohope Ward	25	Whakatane District	04	Bay of Plenty Region	2.86095e+06	6.35306e+06	1	1305300	9	1120	51	3
1698700	21	557100	Cooks Gardens	3702	Urban Ward	37	Wanganui District	08	Manawatu-Wanganui Region	2.6851e+06	6.13924e+06	1	1698700	9	1131	9	3
1698500	3	557100	Cooks Gardens	3702	Urban Ward	37	Wanganui District	08	Manawatu-Wanganui Region	2.68541e+06	6.13929e+06	1	1698500	9	1075	1	3
2745802	3	597711	Fairton	6302	Rakaia Ward	63	Ashburton District	13	Canterbury Region	2.41357e+06	5.70339e+06	1	2745802	2	900	1	1
1701600	42	556900	Wanganui Central	3702	Urban Ward	37	Wanganui District	08	Manawatu-Wanganui Region	2.68559e+06	6.13977e+06	1	1701600	8	1064	19	3
1701400	135	556900	Wanganui Central	3702	Urban Ward	37	Wanganui District	08	Manawatu-Wanganui Region	2.68537e+06	6.13992e+06	1	1701400	10	1191	61	3
1702100	93	556800	Laird Park	3702	Urban Ward	37	Wanganui District	08	Manawatu-Wanganui Region	2.6846e+06	6.14039e+06	1	1702100	10	1193	42	3
1701900	108	556800	Laird Park	3702	Urban Ward	37	Wanganui District	08	Manawatu-Wanganui Region	2.68436e+06	6.14044e+06	1	1701900	10	1192	49	3
1701100	66	556900	Wanganui Central	3702	Urban Ward	37	Wanganui District	08	Manawatu-Wanganui Region	2.6854e+06	6.14007e+06	1	1701100	9	1123	30	3
1700800	96	556900	Wanganui Central	3702	Urban Ward	37	Wanganui District	08	Manawatu-Wanganui Region	2.68501e+06	6.14022e+06	1	1700800	9	1138	43	3
1702300	18	556800	Laird Park	3702	Urban Ward	37	Wanganui District	08	Manawatu-Wanganui Region	2.68443e+06	6.14025e+06	1	1702300	9	1091	8	3
1701300	84	556900	Wanganui Central	3702	Urban Ward	37	Wanganui District	08	Manawatu-Wanganui Region	2.68519e+06	6.14007e+06	1	1701300	9	1123	38	3
1701200	54	556900	Wanganui Central	3702	Urban Ward	37	Wanganui District	08	Manawatu-Wanganui Region	2.68547e+06	6.14001e+06	1	1701200	9	1131	24	3
1701800	69	556800	Laird Park	3702	Urban Ward	37	Wanganui District	08	Manawatu-Wanganui Region	2.68443e+06	6.14053e+06	1	1701800	10	1192	31	3
1700900	72	556900	Wanganui Central	3702	Urban Ward	37	Wanganui District	08	Manawatu-Wanganui Region	2.68525e+06	6.14023e+06	1	1700900	10	1154	32	3
1701700	21	556900	Wanganui Central	3702	Urban Ward	37	Wanganui District	08	Manawatu-Wanganui Region	2.68566e+06	6.1397e+06	1	1701700	8	1064	9	3
108900	282	503500	Raumanga East	205	Okara Ward	2	Whangarei District	01	Northland Region	2.62893e+06	6.60526e+06	1	108900	9	1097	127	3
1700700	93	556900	Wanganui Central	3702	Urban Ward	37	Wanganui District	08	Manawatu-Wanganui Region	2.6851e+06	6.1403e+06	1	1700700	10	1254	42	3
1702200	87	556800	Laird Park	3702	Urban Ward	37	Wanganui District	08	Manawatu-Wanganui Region	2.68451e+06	6.14029e+06	1	1702200	10	1157	39	3
1701000	66	556900	Wanganui Central	3702	Urban Ward	37	Wanganui District	08	Manawatu-Wanganui Region	2.68533e+06	6.14015e+06	1	1701000	10	1154	30	3
108500	105	503500	Raumanga East	205	Okara Ward	2	Whangarei District	01	Northland Region	2.62918e+06	6.60577e+06	1	108500	10	1148	47	3
1307000	84	542410	Whakatane North	2502	Whakatane-Ohope Ward	25	Whakatane District	04	Bay of Plenty Region	2.86059e+06	6.3533e+06	1	1307000	8	1049	38	3
1305702	54	542440	Allandale-Mokorua	2502	Whakatane-Ohope Ward	25	Whakatane District	04	Bay of Plenty Region	2.86141e+06	6.35312e+06	1	1305702	2	903	18	1
1568200	81	552500	Struan Park	3301	New Plymouth City Ward	33	New Plymouth District	07	Taranaki Region	2.60352e+06	6.23592e+06	1	1568200	4	948	28	2
1699700	69	556900	Wanganui Central	3702	Urban Ward	37	Wanganui District	08	Manawatu-Wanganui Region	2.68494e+06	6.14014e+06	1	1699700	9	1103	31	3
1307200	156	542410	Whakatane North	2502	Whakatane-Ohope Ward	25	Whakatane District	04	Bay of Plenty Region	2.86055e+06	6.35313e+06	1	1307200	9	1129	70	3
1568400	138	552500	Struan Park	3301	New Plymouth City Ward	33	New Plymouth District	07	Taranaki Region	2.60336e+06	6.23578e+06	1	1568400	4	940	48	2
1568500	108	552500	Struan Park	3301	New Plymouth City Ward	33	New Plymouth District	07	Taranaki Region	2.60367e+06	6.2357e+06	1	1568500	6	976	38	2
1568900	90	552500	Struan Park	3301	New Plymouth City Ward	33	New Plymouth District	07	Taranaki Region	2.604e+06	6.23627e+06	1	1568900	9	1078	40	3
1699900	69	556900	Wanganui Central	3702	Urban Ward	37	Wanganui District	08	Manawatu-Wanganui Region	2.68512e+06	6.13996e+06	1	1699900	9	1103	31	3
1703200	48	556800	Laird Park	3702	Urban Ward	37	Wanganui District	08	Manawatu-Wanganui Region	2.68451e+06	6.14062e+06	1	1703200	9	1135	22	3
1703300	69	556800	Laird Park	3702	Urban Ward	37	Wanganui District	08	Manawatu-Wanganui Region	2.68483e+06	6.14068e+06	1	1703300	10	1258	31	3
1703400	63	556800	Laird Park	3702	Urban Ward	37	Wanganui District	08	Manawatu-Wanganui Region	2.68474e+06	6.14059e+06	1	1703400	10	1171	28	3
2752103	192	597600	Methven	6301	Methven-Hinds Ward	63	Ashburton District	13	Canterbury Region	2.40026e+06	5.7301e+06	1	2752103	2	905	63	1
2752101	243	597600	Methven	6301	Methven-Hinds Ward	63	Ashburton District	13	Canterbury Region	2.40066e+06	5.73018e+06	1	2752101	3	924	80	1
1703700	69	556800	Laird Park	3702	Urban Ward	37	Wanganui District	08	Manawatu-Wanganui Region	2.68492e+06	6.14045e+06	1	1703700	7	1027	24	2
2752300	51	597600	Methven	6301	Methven-Hinds Ward	63	Ashburton District	13	Canterbury Region	2.40072e+06	5.7298e+06	1	2752300	8	1040	23	3
2752106	27	597600	Methven	6301	Methven-Hinds Ward	63	Ashburton District	13	Canterbury Region	2.40099e+06	5.72965e+06	1	2752106	8	1040	12	3
2752201	81	597600	Methven	6301	Methven-Hinds Ward	63	Ashburton District	13	Canterbury Region	2.4007e+06	5.72995e+06	1	2752201	2	916	27	1
2752502	72	597600	Methven	6301	Methven-Hinds Ward	63	Ashburton District	13	Canterbury Region	2.40059e+06	5.72971e+06	1	2752502	5	954	25	2
1702700	21	556800	Laird Park	3702	Urban Ward	37	Wanganui District	08	Manawatu-Wanganui Region	2.6846e+06	6.14009e+06	1	1702700	9	1091	9	3
1703000	69	556800	Laird Park	3702	Urban Ward	37	Wanganui District	08	Manawatu-Wanganui Region	2.68465e+06	6.14082e+06	1	1703000	9	1081	31	3
1703500	108	556800	Laird Park	3702	Urban Ward	37	Wanganui District	08	Manawatu-Wanganui Region	2.68467e+06	6.14049e+06	1	1703500	10	1171	49	3
1703600	21	556800	Laird Park	3702	Urban Ward	37	Wanganui District	08	Manawatu-Wanganui Region	2.68503e+06	6.1405e+06	1	1703600	10	1258	9	3
2752202	78	597600	Methven	6301	Methven-Hinds Ward	63	Ashburton District	13	Canterbury Region	2.40071e+06	5.73007e+06	1	2752202	2	916	26	1
2752402	30	597720	Mt Somers	6301	Methven-Hinds Ward	63	Ashburton District	13	Canterbury Region	2.40005e+06	5.72994e+06	1	2752402	1	876	10	1
2752102	6	597720	Mt Somers	6301	Methven-Hinds Ward	63	Ashburton District	13	Canterbury Region	2.40095e+06	5.73027e+06	1	2752102	8	1040	3	3
1703800	63	556800	Laird Park	3702	Urban Ward	37	Wanganui District	08	Manawatu-Wanganui Region	2.68485e+06	6.14034e+06	1	1703800	7	1027	22	2
1701500	60	556900	Wanganui Central	3702	Urban Ward	37	Wanganui District	08	Manawatu-Wanganui Region	2.68551e+06	6.13984e+06	1	1701500	9	1131	27	3
1703100	93	556800	Laird Park	3702	Urban Ward	37	Wanganui District	08	Manawatu-Wanganui Region	2.68458e+06	6.14073e+06	1	1703100	9	1135	42	3
2802502	3	599800	Timaru Gardens	6404	Timaru Ward	64	Timaru District	13	Canterbury Region	2371762	5.64261e+06	1	2802502	8	1054	1	3
2792400	6	599500	Seaview	6404	Timaru Ward	64	Timaru District	13	Canterbury Region	2370896	5.64493e+06	1	2792400	8	1051	3	3
446500	138	515801	Epsom Central	704	Hobson Ward	7	Auckland City	02	Auckland Region	2.66835e+06	6.47777e+06	1	446500	4	947	48	2
1200402	189	536831	Arataki	2301	Mount Maunganui-Papamoa Ward	23	Tauranga City	04	Bay of Plenty Region	2.794e+06	6.38743e+06	1	1200402	7	1023	66	2
2802700	114	599800	Timaru Gardens	6404	Timaru Ward	64	Timaru District	13	Canterbury Region	2.37033e+06	5.64248e+06	1	2802700	7	1019	40	2
3190202	105	612802	Riverton West	7305	Riverton Ward	73	Southland District	15	Southland Region	2.12663e+06	5.41555e+06	1	3190202	6	988	37	2
405200	135	515431	Surrey Crescent	701	Western Bays Ward	7	Auckland City	02	Auckland Region	2.66485e+06	6.4805e+06	1	405200	4	943	47	2
3191200	24	612801	Riverton East	7305	Riverton Ward	73	Southland District	15	Southland Region	2.12684e+06	5.41721e+06	1	3191200	9	1089	11	3
959200	258	535241	Karapiro	1703	Maungatautari Ward	17	Waipa District	03	Waikato Region	2.73024e+06	6.36574e+06	1	959200	1	893	85	1
94600	162	502600	Kensington	204	Denby Ward	2	Whangarei District	01	Northland Region	2.62936e+06	6.60944e+06	1	94600	6	988	57	2
106202	105	503300	Horahora	205	Okara Ward	2	Whangarei District	01	Northland Region	2.62741e+06	6.60628e+06	1	106202	1	879	35	1
54501	96	501100	Paihia	102	Eastern Ward	1	Far North District	01	Northland Region	2.61011e+06	6.65672e+06	1	54501	6	975	34	2
987800	27	527935	Te Rahu	1705	Kakepuku Ward	17	Waipa District	03	Waikato Region	2.71428e+06	6.35363e+06	1	987800	3	922	9	1
1378000	99	544200	Mangapapa	2807	Gisborne Ward	28	Gisborne District	05	Gisborne Region	2.94581e+06	6.27186e+06	1	1378000	10	1283	45	3
481300	123	516101	Remuera West	704	Hobson Ward	7	Auckland City	02	Auckland Region	2.66929e+06	6.47964e+06	1	481300	2	907	41	1
494000	120	516002	Remuera South	704	Hobson Ward	7	Auckland City	02	Auckland Region	2.67021e+06	6.47777e+06	1	494000	6	980	42	2
1566400	120	552500	Struan Park	3301	New Plymouth City Ward	33	New Plymouth District	07	Taranaki Region	2.60382e+06	6.23529e+06	1	1566400	8	1052	54	3
1569100	75	552500	Struan Park	3301	New Plymouth City Ward	33	New Plymouth District	07	Taranaki Region	2.60405e+06	6.23598e+06	1	1569100	7	1013	26	2
102800	90	502900	Woodhill	205	Okara Ward	2	Whangarei District	01	Northland Region	2.62894e+06	6.60679e+06	1	102800	8	1043	40	3
1569400	60	552500	Struan Park	3301	New Plymouth City Ward	33	New Plymouth District	07	Taranaki Region	2.60415e+06	6.23538e+06	1	1569400	7	1004	21	2
102400	210	502900	Woodhill	205	Okara Ward	2	Whangarei District	01	Northland Region	2.62888e+06	6.60736e+06	1	102400	8	1063	94	3
96200	9	502800	Regent	205	Okara Ward	2	Whangarei District	01	Northland Region	2.62987e+06	6.60784e+06	1	96200	6	979	3	2
1557808	186	551022	Highlands Park	3301	New Plymouth City Ward	33	New Plymouth District	07	Taranaki Region	2.6051e+06	6.2355e+06	1	1557808	5	956	65	2
88801	99	502300	Whau Valley	204	Denby Ward	2	Whangarei District	01	Northland Region	2.6286e+06	6.61126e+06	1	88801	4	947	35	2
624600	132	519300	One Tree Hill Central	704	Hobson Ward	7	Auckland City	02	Auckland Region	2.6687e+06	6.47596e+06	1	624600	1	898	44	1
1378600	147	544200	Mangapapa	2807	Gisborne Ward	28	Gisborne District	05	Gisborne Region	2.94655e+06	6.27132e+06	1	1378600	3	921	49	1
95000	78	502600	Kensington	204	Denby Ward	2	Whangarei District	01	Northland Region	2.6298e+06	6.60968e+06	1	95000	9	1101	35	3
86800	189	502201	Tikipunga West	204	Denby Ward	2	Whangarei District	01	Northland Region	2.63063e+06	6.61144e+06	1	86800	7	1021	66	2
106300	72	503300	Horahora	205	Okara Ward	2	Whangarei District	01	Northland Region	2.62848e+06	6.6063e+06	1	106300	6	974	25	2
