# Supplementary material for: Optimising locational access of deprived populations to farmers’ markets at a national scale: one route to improved fruit and vegetable consumption?
Source: PeerJ. 2013 Jul 2;1:e94. doi: 10.7717/peerj.94 (PMC3709110; doi:10.7717/peerj.94)
Supplement: Supplemental Information 4 [file peerj-01-94-s004.xlsx]

## Sheet: Pop_Scenario1_125kBuffer
MB2006	MBUR_POP20	CAU2006	CAU_DESCR	WARD_COD	WARD_DES	TA_CODE	TA_DESC	RC_COD	RC_DESC	POINT_X	POINT_Y	Cnt_MB2006	MB2006_1	NZDep2006	NZDep_scor	Weight	DepCat
919100	132	529000	Swarbrick	1601	West Ward	16	Hamilton City	03	Waikato Region	2.70859e+06	6.37611e+06	1	919100	9	1120	59	3
919000	186	529000	Swarbrick	1601	West Ward	16	Hamilton City	03	Waikato Region	2.70834e+06	6.37608e+06	1	919000	9	1093	84	3
2098000	75	574402	Ngaio	4702	Onslow-Western Ward	47	Wellington City	09	Wellington Region	2.65851e+06	5.99347e+06	1	2098000	1	879	25	1
917600	165	529000	Swarbrick	1601	West Ward	16	Hamilton City	03	Waikato Region	2.7087e+06	6.37669e+06	1	917600	9	1094	74	3
2884800	132	603910	Wakari	7104	Hills Ward	71	Dunedin City	14	Otago Region	2.31416e+06	5.48004e+06	1	2884800	6	991	46	2
655500	135	521502	Cockle Bay	806	Howick Ward	8	Manukau City	02	Auckland Region	2.68425e+06	6.47569e+06	1	655500	1	887	45	1
2359603	105	581723	Saxton	5299	Area Outside Ward	52	Nelson City	17	Nelson Region	2.52847e+06	5.98779e+06	1	2359603	3	920	35	1
2359511	90	581723	Saxton	5299	Area Outside Ward	52	Nelson City	17	Nelson Region	2.52878e+06	5.9883e+06	1	2359511	4	942	31	2
1835800	117	562402	Papaeoia	4001	Papaioea Ward	40	Palmerston North City	08	Manawatu-Wanganui Region	2.73257e+06	6.0922e+06	1	1835800	6	983	41	2
1835600	171	562402	Papaeoia	4001	Papaioea Ward	40	Palmerston North City	08	Manawatu-Wanganui Region	2.73228e+06	6.09214e+06	1	1835600	5	956	60	2
2119200	45	572900	Thorndon-Tinakori Road	4703	Lambton Ward	47	Wellington City	09	Wellington Region	2.65901e+06	5.99091e+06	1	2119200	6	977	16	2
2622500	141	594600	Sydenham	6006	Spreydon-Heathcote Ward	60	Christchurch City	13	Canterbury Region	2.481e+06	5.73886e+06	1	2622500	7	1010	49	2
2621501	84	594600	Sydenham	6006	Spreydon-Heathcote Ward	60	Christchurch City	13	Canterbury Region	2.48086e+06	5.73956e+06	1	2621501	8	1062	38	3
2622702	87	594600	Sydenham	6006	Spreydon-Heathcote Ward	60	Christchurch City	13	Canterbury Region	2.4811e+06	5.73914e+06	1	2622702	9	1096	39	3
2621703	54	594600	Sydenham	6006	Spreydon-Heathcote Ward	60	Christchurch City	13	Canterbury Region	2.48094e+06	5.73921e+06	1	2621703	8	1054	24	3
2491700	225	587500	Hornby South	6004	Riccarton-Wigram Ward	60	Christchurch City	13	Canterbury Region	2.47231e+06	5.73968e+06	1	2491700	7	1016	79	2
263200	114	511401	Fruitvale	604	New Lynn Ward	6	Waitakere City	02	Auckland Region	2.65907e+06	6.47525e+06	1	263200	8	1039	51	3
2098200	189	574402	Ngaio	4702	Onslow-Western Ward	47	Wellington City	09	Wellington Region	2.65853e+06	5.99321e+06	1	2098200	1	868	62	1
917800	54	529000	Swarbrick	1601	West Ward	16	Hamilton City	03	Waikato Region	2.70918e+06	6.37661e+06	1	917800	10	1141	24	3
2774604	159	599300	Gleniti	6404	Timaru Ward	64	Timaru District	13	Canterbury Region	2.36634e+06	5.64545e+06	1	2774604	1	868	52	1
2884700	189	603910	Wakari	7104	Hills Ward	71	Dunedin City	14	Otago Region	2.31391e+06	5.47989e+06	1	2884700	3	934	62	1
1966700	42	569100	Hutt Central	4604	Central Ward	46	Lower Hutt City	09	Wellington Region	2.66937e+06	5.99788e+06	1	1966700	9	1077	19	3
1835400	81	562402	Papaeoia	4005	Hokowhitu Ward	40	Palmerston North City	08	Manawatu-Wanganui Region	2.73313e+06	6.09162e+06	1	1835400	6	994	28	2
1836400	210	562402	Papaeoia	4005	Hokowhitu Ward	40	Palmerston North City	08	Manawatu-Wanganui Region	2.73272e+06	6.0916e+06	1	1836400	8	1040	94	3
262701	207	511401	Fruitvale	604	New Lynn Ward	6	Waitakere City	02	Auckland Region	2.65877e+06	6.4748e+06	1	262701	6	982	72	2
1574400	141	551700	Westown	3301	New Plymouth City Ward	33	New Plymouth District	07	Taranaki Region	2.60254e+06	6.23701e+06	1	1574400	5	964	49	2
1573900	120	551700	Westown	3301	New Plymouth City Ward	33	New Plymouth District	07	Taranaki Region	2.60217e+06	6.23702e+06	1	1573900	7	1010	42	2
2490900	63	587500	Hornby South	6004	Riccarton-Wigram Ward	60	Christchurch City	13	Canterbury Region	2.47185e+06	5.73917e+06	1	2490900	5	974	22	2
262500	135	511401	Fruitvale	604	New Lynn Ward	6	Waitakere City	02	Auckland Region	2.65898e+06	6.47511e+06	1	262500	9	1085	61	3
786801	165	521801	Otahuhu North	706	Tamaki-Maungakiekie Ward	7	Auckland City	02	Auckland Region	2.67463e+06	6.47205e+06	1	786801	10	1145	74	3
786902	135	521801	Otahuhu North	706	Tamaki-Maungakiekie Ward	7	Auckland City	02	Auckland Region	2.67479e+06	6.47196e+06	1	786902	9	1123	61	3
2490700	111	587500	Hornby South	6004	Riccarton-Wigram Ward	60	Christchurch City	13	Canterbury Region	2.47223e+06	5.73935e+06	1	2490700	7	1019	39	2
2621502	96	594600	Sydenham	6006	Spreydon-Heathcote Ward	60	Christchurch City	13	Canterbury Region	2.4809e+06	5.73948e+06	1	2621502	8	1062	43	3
2623000	126	594600	Sydenham	6006	Spreydon-Heathcote Ward	60	Christchurch City	13	Canterbury Region	2.48135e+06	5.7394e+06	1	2623000	10	1154	57	3
2622900	159	594600	Sydenham	6006	Spreydon-Heathcote Ward	60	Christchurch City	13	Canterbury Region	2.48128e+06	5.73935e+06	1	2622900	9	1095	72	3
525500	333	517800	Mt Albert Central	703	Eden-Albert Ward	7	Auckland City	02	Auckland Region	2.6631e+06	6.47874e+06	1	525500	7	1001	117	2
2491800	207	587500	Hornby South	6004	Riccarton-Wigram Ward	60	Christchurch City	13	Canterbury Region	2.47222e+06	5.73959e+06	1	2491800	9	1073	93	3
2098501	57	574600	Wadestown	4703	Lambton Ward	47	Wellington City	09	Wellington Region	2.65902e+06	5.99265e+06	1	2098501	1	871	19	1
524700	258	517901	Springleigh	703	Eden-Albert Ward	7	Auckland City	02	Auckland Region	2.66292e+06	6.47806e+06	1	524700	7	1018	90	2
2097300	42	574402	Ngaio	4702	Onslow-Western Ward	47	Wellington City	09	Wellington Region	2.65925e+06	5.99335e+06	1	2097300	2	904	14	1
2098100	276	574402	Ngaio	4702	Onslow-Western Ward	47	Wellington City	09	Wellington Region	2.65832e+06	5.99318e+06	1	2098100	1	893	91	1
2097504	33	574402	Ngaio	4702	Onslow-Western Ward	47	Wellington City	09	Wellington Region	2.65916e+06	5.99331e+06	1	2097504	1	877	11	1
2884300	117	603910	Wakari	7104	Hills Ward	71	Dunedin City	14	Otago Region	2.31411e+06	5.47942e+06	1	2884300	6	990	41	2
2884900	69	603910	Wakari	7104	Hills Ward	71	Dunedin City	14	Otago Region	2.31432e+06	5.47989e+06	1	2884900	6	987	24	2
2885000	105	603910	Wakari	7104	Hills Ward	71	Dunedin City	14	Otago Region	2.31441e+06	5.47981e+06	1	2885000	4	945	37	2
2359407	15	581723	Saxton	5299	Area Outside Ward	52	Nelson City	17	Nelson Region	2.52762e+06	5.98664e+06	1	2359407	4	940	5	2
1966400	231	569100	Hutt Central	4604	Central Ward	46	Lower Hutt City	09	Wellington Region	2.66954e+06	5.99684e+06	1	1966400	9	1077	104	3
1966200	84	569100	Hutt Central	4604	Central Ward	46	Lower Hutt City	09	Wellington Region	2.6693e+06	5.99741e+06	1	1966200	1	888	28	1
1966100	45	569100	Hutt Central	4604	Central Ward	46	Lower Hutt City	09	Wellington Region	2.66972e+06	5.99751e+06	1	1966100	1	863	15	1
1836500	138	562402	Papaeoia	4005	Hokowhitu Ward	40	Palmerston North City	08	Manawatu-Wanganui Region	2.73291e+06	6.09156e+06	1	1836500	9	1105	62	3
655400	135	521502	Cockle Bay	806	Howick Ward	8	Manukau City	02	Auckland Region	2.6842e+06	6.47596e+06	1	655400	2	916	45	1
263700	270	511401	Fruitvale	604	New Lynn Ward	6	Waitakere City	02	Auckland Region	2.65946e+06	6.47504e+06	1	263700	8	1060	122	3
2119100	6	572900	Thorndon-Tinakori Road	4703	Lambton Ward	47	Wellington City	09	Wellington Region	2.6591e+06	5.99085e+06	1	2119100	6	977	2	2
787900	24	521802	Fairburn	706	Tamaki-Maungakiekie Ward	7	Auckland City	02	Auckland Region	2.67497e+06	6.47149e+06	1	787900	10	1152	11	3
2622300	135	594600	Sydenham	6006	Spreydon-Heathcote Ward	60	Christchurch City	13	Canterbury Region	2.48105e+06	5.73904e+06	1	2622300	8	1072	61	3
786802	189	521801	Otahuhu North	706	Tamaki-Maungakiekie Ward	7	Auckland City	02	Auckland Region	2.67465e+06	6.47191e+06	1	786802	10	1188	85	3
2490800	108	587500	Hornby South	6004	Riccarton-Wigram Ward	60	Christchurch City	13	Canterbury Region	2.47207e+06	5.73927e+06	1	2490800	2	916	36	1
2490500	66	587500	Hornby South	6004	Riccarton-Wigram Ward	60	Christchurch City	13	Canterbury Region	2.47182e+06	5.73936e+06	1	2490500	6	985	23	2
2621602	69	594600	Sydenham	6006	Spreydon-Heathcote Ward	60	Christchurch City	13	Canterbury Region	2.48097e+06	5.73935e+06	1	2621602	8	1067	31	3
394300	120	515002	Point Chevalier East	701	Western Bays Ward	7	Auckland City	02	Auckland Region	2.66248e+06	6.48166e+06	1	394300	1	898	40	1
2097400	69	574402	Ngaio	4702	Onslow-Western Ward	47	Wellington City	09	Wellington Region	2.65866e+06	5.99325e+06	1	2097400	1	877	23	1
525200	159	517800	Mt Albert Central	703	Eden-Albert Ward	7	Auckland City	02	Auckland Region	2.66349e+06	6.47909e+06	1	525200	5	973	56	2
2884500	30	603910	Wakari	7104	Hills Ward	71	Dunedin City	14	Otago Region	2.31433e+06	5.47939e+06	1	2884500	7	1011	10	2
2885100	129	603910	Wakari	7104	Hills Ward	71	Dunedin City	14	Otago Region	2.31453e+06	5.47968e+06	1	2885100	10	1193	58	3
2884100	111	603910	Wakari	7104	Hills Ward	71	Dunedin City	14	Otago Region	2.31427e+06	5.47969e+06	1	2884100	8	1041	50	3
2359601	162	581723	Saxton	5299	Area Outside Ward	52	Nelson City	17	Nelson Region	2.52868e+06	5.98777e+06	1	2359601	5	961	57	2
2359512	99	581723	Saxton	5299	Area Outside Ward	52	Nelson City	17	Nelson Region	2.52862e+06	5.98822e+06	1	2359512	2	915	33	1
1835100	21	562402	Papaeoia	4001	Papaioea Ward	40	Palmerston North City	08	Manawatu-Wanganui Region	2.73306e+06	6.09192e+06	1	1835100	9	1105	9	3
1835900	93	562402	Papaeoia	4001	Papaioea Ward	40	Palmerston North City	08	Manawatu-Wanganui Region	2.73268e+06	6.09197e+06	1	1835900	5	967	33	2
1967300	3	569100	Hutt Central	4604	Central Ward	46	Lower Hutt City	09	Wellington Region	2.66935e+06	5.99779e+06	1	1967300	9	1077	1	3
1967700	45	569100	Hutt Central	4604	Central Ward	46	Lower Hutt City	09	Wellington Region	2.67011e+06	5.99812e+06	1	1967700	9	1077	20	3
1966800	18	569100	Hutt Central	4604	Central Ward	46	Lower Hutt City	09	Wellington Region	2.66947e+06	5.99805e+06	1	1966800	9	1077	8	3
787400	336	521801	Otahuhu North	706	Tamaki-Maungakiekie Ward	7	Auckland City	02	Auckland Region	2.67489e+06	6.47175e+06	1	787400	9	1131	151	3
2622802	63	594600	Sydenham	6006	Spreydon-Heathcote Ward	60	Christchurch City	13	Canterbury Region	2.48116e+06	5.73926e+06	1	2622802	7	1030	22	2
2097601	204	574402	Ngaio	4702	Onslow-Western Ward	47	Wellington City	09	Wellington Region	2.65872e+06	5.99305e+06	1	2097601	1	874	67	1
2097900	9	574402	Ngaio	4702	Onslow-Western Ward	47	Wellington City	09	Wellington Region	2.65799e+06	5.99291e+06	1	2097900	1	879	3	1
525400	132	517800	Mt Albert Central	703	Eden-Albert Ward	7	Auckland City	02	Auckland Region	2.66336e+06	6.47873e+06	1	525400	4	940	46	2
525000	108	517800	Mt Albert Central	703	Eden-Albert Ward	7	Auckland City	02	Auckland Region	2.66359e+06	6.47932e+06	1	525000	3	930	36	1
2097700	3	574402	Ngaio	4702	Onslow-Western Ward	47	Wellington City	09	Wellington Region	2.65849e+06	5.99354e+06	1	2097700	1	879	1	1
1836200	66	562402	Papaeoia	4001	Papaioea Ward	40	Palmerston North City	08	Manawatu-Wanganui Region	2.73245e+06	6.09182e+06	1	1836200	8	1051	30	3
1835200	81	562402	Papaeoia	4005	Hokowhitu Ward	40	Palmerston North City	08	Manawatu-Wanganui Region	2.73319e+06	6.09185e+06	1	1835200	10	1213	36	3
1967200	12	569100	Hutt Central	4604	Central Ward	46	Lower Hutt City	09	Wellington Region	2.67013e+06	5.99838e+06	1	1967200	9	1077	5	3
1835700	222	562402	Papaeoia	4001	Papaioea Ward	40	Palmerston North City	08	Manawatu-Wanganui Region	2.73243e+06	6.09225e+06	1	1835700	6	987	78	2
394200	123	515002	Point Chevalier East	701	Western Bays Ward	7	Auckland City	02	Auckland Region	2.66237e+06	6.48174e+06	1	394200	3	926	41	1
525700	156	517800	Mt Albert Central	703	Eden-Albert Ward	7	Auckland City	02	Auckland Region	2.66326e+06	6.47849e+06	1	525700	8	1046	70	3
1574500	120	551700	Westown	3301	New Plymouth City Ward	33	New Plymouth District	07	Taranaki Region	2.60244e+06	6.23683e+06	1	1574500	9	1104	54	3
1574100	87	551700	Westown	3301	New Plymouth City Ward	33	New Plymouth District	07	Taranaki Region	2.60259e+06	6.23722e+06	1	1574100	7	1000	30	2
263400	102	511401	Fruitvale	604	New Lynn Ward	6	Waitakere City	02	Auckland Region	2.6592e+06	6.47508e+06	1	263400	7	1013	36	2
525900	90	517800	Mt Albert Central	703	Eden-Albert Ward	7	Auckland City	02	Auckland Region	2.66404e+06	6.4795e+06	1	525900	6	984	31	2
787300	99	521801	Otahuhu North	706	Tamaki-Maungakiekie Ward	7	Auckland City	02	Auckland Region	2.67471e+06	6.4717e+06	1	787300	10	1152	45	3
2490400	96	587500	Hornby South	6004	Riccarton-Wigram Ward	60	Christchurch City	13	Canterbury Region	2.47199e+06	5.7395e+06	1	2490400	6	989	34	2
2622701	78	594600	Sydenham	6006	Spreydon-Heathcote Ward	60	Christchurch City	13	Canterbury Region	2.48116e+06	5.7392e+06	1	2622701	9	1096	35	3
2098602	33	574600	Wadestown	4703	Lambton Ward	47	Wellington City	09	Wellington Region	2.65937e+06	5.9926e+06	1	2098602	1	871	11	1
2491600	192	587500	Hornby South	6004	Riccarton-Wigram Ward	60	Christchurch City	13	Canterbury Region	2.47243e+06	5.73973e+06	1	2491600	7	1012	67	2
525600	153	517800	Mt Albert Central	703	Eden-Albert Ward	7	Auckland City	02	Auckland Region	2.66317e+06	6.47858e+06	1	525600	8	1032	69	3
918500	102	529000	Swarbrick	1601	West Ward	16	Hamilton City	03	Waikato Region	2.7091e+06	6.37609e+06	1	918500	9	1085	46	3
918000	213	529000	Swarbrick	1601	West Ward	16	Hamilton City	03	Waikato Region	2.70861e+06	6.37631e+06	1	918000	9	1092	96	3
918400	84	529000	Swarbrick	1601	West Ward	16	Hamilton City	03	Waikato Region	2.70919e+06	6.37633e+06	1	918400	7	1007	29	2
2884002	42	603910	Wakari	7104	Hills Ward	71	Dunedin City	14	Otago Region	2.31394e+06	5.47963e+06	1	2884002	1	882	14	1
2884200	129	603910	Wakari	7104	Hills Ward	71	Dunedin City	14	Otago Region	2.31417e+06	5.47953e+06	1	2884200	6	977	45	2
2206400	105	577200	Miramar South	4704	Eastern Ward	47	Wellington City	09	Wellington Region	2.66161e+06	5.98578e+06	1	2206400	4	939	37	2
524300	225	517901	Springleigh	703	Eden-Albert Ward	7	Auckland City	02	Auckland Region	2.66297e+06	6.47846e+06	1	524300	6	984	79	2
262702	48	511100	Glen Eden East	604	New Lynn Ward	6	Waitakere City	02	Auckland Region	2.6586e+06	6.47488e+06	1	262702	6	982	17	2
1966300	90	569100	Hutt Central	4604	Central Ward	46	Lower Hutt City	09	Wellington Region	2.66942e+06	5.99715e+06	1	1966300	3	929	30	1
2359510	36	581723	Saxton	5299	Area Outside Ward	52	Nelson City	17	Nelson Region	2.52891e+06	5.98836e+06	1	2359510	4	942	13	2
1835500	156	562402	Papaeoia	4005	Hokowhitu Ward	40	Palmerston North City	08	Manawatu-Wanganui Region	2.73331e+06	6.09169e+06	1	1835500	7	1025	55	2
1836300	51	562402	Papaeoia	4001	Papaioea Ward	40	Palmerston North City	08	Manawatu-Wanganui Region	2.73266e+06	6.0917e+06	1	1836300	8	1051	23	3
1835300	63	562402	Papaeoia	4005	Hokowhitu Ward	40	Palmerston North City	08	Manawatu-Wanganui Region	2.73302e+06	6.09176e+06	1	1835300	9	1105	28	3
393800	135	515001	Point Chevalier West	701	Western Bays Ward	7	Auckland City	02	Auckland Region	2.66238e+06	6.48057e+06	1	393800	5	965	47	2
262800	171	511401	Fruitvale	604	New Lynn Ward	6	Waitakere City	02	Auckland Region	2.65891e+06	6.47465e+06	1	262800	8	1064	77	3
1944400	87	568401	Avalon West	4604	Central Ward	46	Lower Hutt City	09	Wellington Region	2.67252e+06	5.99959e+06	1	1944400	6	985	30	2
263300	348	511401	Fruitvale	604	New Lynn Ward	6	Waitakere City	02	Auckland Region	2.65935e+06	6.47525e+06	1	263300	5	969	122	2
524400	69	517901	Springleigh	703	Eden-Albert Ward	7	Auckland City	02	Auckland Region	2.66307e+06	6.47837e+06	1	524400	7	1017	24	2
786901	189	521801	Otahuhu North	706	Tamaki-Maungakiekie Ward	7	Auckland City	02	Auckland Region	2.67485e+06	6.47206e+06	1	786901	10	1185	85	3
655600	171	521502	Cockle Bay	806	Howick Ward	8	Manukau City	02	Auckland Region	2.68443e+06	6.4757e+06	1	655600	1	887	56	1
525100	75	517800	Mt Albert Central	703	Eden-Albert Ward	7	Auckland City	02	Auckland Region	2.66354e+06	6.47923e+06	1	525100	4	940	26	2
917900	189	529000	Swarbrick	1601	West Ward	16	Hamilton City	03	Waikato Region	2.70839e+06	6.3763e+06	1	917900	10	1159	85	3
918300	219	529000	Swarbrick	1601	West Ward	16	Hamilton City	03	Waikato Region	2.709e+06	6.37631e+06	1	918300	9	1108	99	3
2491402	57	587500	Hornby South	6004	Riccarton-Wigram Ward	60	Christchurch City	13	Canterbury Region	2.47191e+06	5.7399e+06	1	2491402	8	1054	26	3
2097200	120	574402	Ngaio	4702	Onslow-Western Ward	47	Wellington City	09	Wellington Region	2.65895e+06	5.99331e+06	1	2097200	1	882	40	1
917700	279	529000	Swarbrick	1601	West Ward	16	Hamilton City	03	Waikato Region	2.70901e+06	6.3766e+06	1	917700	10	1197	126	3
2884400	108	603910	Wakari	7104	Hills Ward	71	Dunedin City	14	Otago Region	2.31441e+06	5.47954e+06	1	2884400	7	1011	38	2
525800	117	517800	Mt Albert Central	703	Eden-Albert Ward	7	Auckland City	02	Auckland Region	2.664e+06	6.47954e+06	1	525800	6	984	41	2
2359605	213	581723	Saxton	5299	Area Outside Ward	52	Nelson City	17	Nelson Region	2.52828e+06	5.98728e+06	1	2359605	2	917	70	1
394400	183	515001	Point Chevalier West	701	Western Bays Ward	7	Auckland City	02	Auckland Region	2.66225e+06	6.48145e+06	1	394400	5	969	64	2
394800	69	515002	Point Chevalier East	701	Western Bays Ward	7	Auckland City	02	Auckland Region	2.66262e+06	6.48144e+06	1	394800	4	937	24	2
524900	81	517800	Mt Albert Central	703	Eden-Albert Ward	7	Auckland City	02	Auckland Region	2.66366e+06	6.47939e+06	1	524900	5	973	28	2
2491100	102	587500	Hornby South	6004	Riccarton-Wigram Ward	60	Christchurch City	13	Canterbury Region	2.47213e+06	5.73909e+06	1	2491100	5	974	36	2
2622803	63	594600	Sydenham	6006	Spreydon-Heathcote Ward	60	Christchurch City	13	Canterbury Region	2.48135e+06	5.73913e+06	1	2622803	7	1030	22	2
2621900	114	594600	Sydenham	6006	Spreydon-Heathcote Ward	60	Christchurch City	13	Canterbury Region	2.48052e+06	5.73919e+06	1	2621900	9	1120	51	3
2491000	132	587500	Hornby South	6004	Riccarton-Wigram Ward	60	Christchurch City	13	Canterbury Region	2.47197e+06	5.73906e+06	1	2491000	3	933	44	1
2621601	63	594600	Sydenham	6006	Spreydon-Heathcote Ward	60	Christchurch City	13	Canterbury Region	2.4808e+06	5.73944e+06	1	2621601	8	1067	28	3
2621503	87	594600	Sydenham	6006	Spreydon-Heathcote Ward	60	Christchurch City	13	Canterbury Region	2.48105e+06	5.7394e+06	1	2621503	8	1062	39	3
525300	108	517800	Mt Albert Central	703	Eden-Albert Ward	7	Auckland City	02	Auckland Region	2.66337e+06	6.47884e+06	1	525300	2	913	36	1
524500	105	517901	Springleigh	703	Eden-Albert Ward	7	Auckland City	02	Auckland Region	2.66311e+06	6.47831e+06	1	524500	7	1017	37	2
918200	156	529000	Swarbrick	1601	West Ward	16	Hamilton City	03	Waikato Region	2.70881e+06	6.37626e+06	1	918200	9	1109	70	3
2884001	90	603910	Wakari	7104	Hills Ward	71	Dunedin City	14	Otago Region	2.31382e+06	5.47979e+06	1	2884001	1	882	30	1
2359707	222	581715	Ngawhatu	5299	Area Outside Ward	52	Nelson City	17	Nelson Region	2.52838e+06	5.98688e+06	1	2359707	3	928	73	1
1574300	111	551700	Westown	3301	New Plymouth City Ward	33	New Plymouth District	07	Taranaki Region	2.6023e+06	6.23687e+06	1	1574300	7	1025	39	2
787800	117	521802	Fairburn	706	Tamaki-Maungakiekie Ward	7	Auckland City	02	Auckland Region	2.67477e+06	6.47147e+06	1	787800	10	1165	53	3
2622703	84	594600	Sydenham	6006	Spreydon-Heathcote Ward	60	Christchurch City	13	Canterbury Region	2.48128e+06	5.73902e+06	1	2622703	9	1096	38	3
2621701	168	594600	Sydenham	6006	Spreydon-Heathcote Ward	60	Christchurch City	13	Canterbury Region	2.48076e+06	5.73934e+06	1	2621701	8	1054	76	3
2490600	132	587500	Hornby South	6004	Riccarton-Wigram Ward	60	Christchurch City	13	Canterbury Region	2.47172e+06	5.73929e+06	1	2490600	6	984	46	2
2621603	84	594600	Sydenham	6006	Spreydon-Heathcote Ward	60	Christchurch City	13	Canterbury Region	2.48089e+06	5.73934e+06	1	2621603	8	1067	38	3
2622801	75	594600	Sydenham	6006	Spreydon-Heathcote Ward	60	Christchurch City	13	Canterbury Region	2.48123e+06	5.7393e+06	1	2622801	7	1030	26	2
918700	111	529000	Swarbrick	1601	West Ward	16	Hamilton City	03	Waikato Region	2.70896e+06	6.37588e+06	1	918700	8	1060	50	3
786600	84	521801	Otahuhu North	706	Tamaki-Maungakiekie Ward	7	Auckland City	02	Auckland Region	2.67477e+06	6.4722e+06	1	786600	10	1145	38	3
2097503	60	574402	Ngaio	4702	Onslow-Western Ward	47	Wellington City	09	Wellington Region	2.65919e+06	5.99312e+06	1	2097503	1	877	20	1
918100	120	529000	Swarbrick	1601	West Ward	16	Hamilton City	03	Waikato Region	2.70879e+06	6.37648e+06	1	918100	9	1123	54	3
2885200	96	603910	Wakari	7104	Hills Ward	71	Dunedin City	14	Otago Region	2.31466e+06	5.4797e+06	1	2885200	6	987	34	2
2884600	69	603910	Wakari	7104	Hills Ward	71	Dunedin City	14	Otago Region	2.31396e+06	5.48018e+06	1	2884600	5	965	24	2
1966500	84	569100	Hutt Central	4604	Central Ward	46	Lower Hutt City	09	Wellington Region	2.66956e+06	5.99694e+06	1	1966500	1	863	28	1
2359509	63	581723	Saxton	5299	Area Outside Ward	52	Nelson City	17	Nelson Region	2.52844e+06	5.98817e+06	1	2359509	4	945	22	2
262900	93	511401	Fruitvale	604	New Lynn Ward	6	Waitakere City	02	Auckland Region	2.65902e+06	6.47444e+06	1	262900	9	1085	42	3
263500	195	511401	Fruitvale	604	New Lynn Ward	6	Waitakere City	02	Auckland Region	2.65972e+06	6.47512e+06	1	263500	6	980	68	2
1836600	102	562402	Papaeoia	4005	Hokowhitu Ward	40	Palmerston North City	08	Manawatu-Wanganui Region	2.73269e+06	6.09142e+06	1	1836600	6	994	36	2
1836000	42	562402	Papaeoia	4001	Papaioea Ward	40	Palmerston North City	08	Manawatu-Wanganui Region	2.73258e+06	6.09191e+06	1	1836000	5	967	15	2
1836100	42	562402	Papaeoia	4001	Papaioea Ward	40	Palmerston North City	08	Manawatu-Wanganui Region	2.73251e+06	6.09192e+06	1	1836100	5	967	15	2
262600	150	511401	Fruitvale	604	New Lynn Ward	6	Waitakere City	02	Auckland Region	2.65896e+06	6.47489e+06	1	262600	6	984	52	2
1967600	3	569100	Hutt Central	4604	Central Ward	46	Lower Hutt City	09	Wellington Region	2.66983e+06	5.99811e+06	1	1967600	9	1077	1	3
394700	153	515002	Point Chevalier East	701	Western Bays Ward	7	Auckland City	02	Auckland Region	2.66243e+06	6.48151e+06	1	394700	4	943	54	2
240504	30	510700	Henderson North	603	Henderson Ward	6	Waitakere City	02	Auckland Region	2.65676e+06	6.47911e+06	1	240504	8	1062	14	3
2622600	192	594600	Sydenham	6006	Spreydon-Heathcote Ward	60	Christchurch City	13	Canterbury Region	2.48121e+06	5.73888e+06	1	2622600	6	989	67	2
524600	318	517901	Springleigh	703	Eden-Albert Ward	7	Auckland City	02	Auckland Region	2.6629e+06	6.4782e+06	1	524600	6	995	111	2
2097502	45	574402	Ngaio	4702	Onslow-Western Ward	47	Wellington City	09	Wellington Region	2.6593e+06	5.99292e+06	1	2097502	1	877	15	1
2624401	132	594500	Waltham	6005	Hagley-Ferrymead Ward	60	Christchurch City	13	Canterbury Region	2.48165e+06	5.74004e+06	1	2624401	9	1130	59	3
2362000	237	584201	Richmond East	5105	Richmond Ward	51	Tasman District	16	Tasman Region	2.52595e+06	5.98497e+06	1	2362000	7	1022	83	2
264800	132	511402	Rewarewa	604	New Lynn Ward	6	Waitakere City	02	Auckland Region	2.66056e+06	6.47471e+06	1	264800	6	998	46	2
1968800	108	569100	Hutt Central	4604	Central Ward	46	Lower Hutt City	09	Wellington Region	2.67063e+06	5.99835e+06	1	1968800	4	944	38	2
395900	132	515002	Point Chevalier East	701	Western Bays Ward	7	Auckland City	02	Auckland Region	2.66278e+06	6.48067e+06	1	395900	5	958	46	2
789200	144	521802	Fairburn	706	Tamaki-Maungakiekie Ward	7	Auckland City	02	Auckland Region	2.67526e+06	6.47087e+06	1	789200	9	1131	65	3
2623200	126	594600	Sydenham	6006	Spreydon-Heathcote Ward	60	Christchurch City	13	Canterbury Region	2.48152e+06	5.73918e+06	1	2623200	6	988	44	2
2624502	78	594500	Waltham	6006	Spreydon-Heathcote Ward	60	Christchurch City	13	Canterbury Region	2.48173e+06	5.73981e+06	1	2624502	9	1092	35	3
526000	186	517800	Mt Albert Central	703	Eden-Albert Ward	7	Auckland City	02	Auckland Region	2.66414e+06	6.47936e+06	1	526000	6	979	65	2
2362200	153	584201	Richmond East	5105	Richmond Ward	51	Tasman District	16	Tasman Region	2.52613e+06	5.98486e+06	1	2362200	6	984	54	2
2885700	36	603910	Wakari	7104	Hills Ward	71	Dunedin City	14	Otago Region	2.31439e+06	5.48004e+06	1	2885700	6	994	13	2
1706400	33	557200	St Johns Hill	3702	Urban Ward	37	Wanganui District	08	Manawatu-Wanganui Region	2.68369e+06	6.14116e+06	1	1706400	4	941	12	2
1705802	69	557200	St Johns Hill	3702	Urban Ward	37	Wanganui District	08	Manawatu-Wanganui Region	2.68349e+06	6.14117e+06	1	1705802	1	872	23	1
526400	120	517800	Mt Albert Central	703	Eden-Albert Ward	7	Auckland City	02	Auckland Region	2.66358e+06	6.479e+06	1	526400	6	994	42	2
263900	234	511401	Fruitvale	604	New Lynn Ward	6	Waitakere City	02	Auckland Region	2.6591e+06	6.47473e+06	1	263900	8	1046	105	3
1967900	108	569100	Hutt Central	4604	Central Ward	46	Lower Hutt City	09	Wellington Region	2.67028e+06	5.99798e+06	1	1967900	3	919	36	1
1968100	9	569100	Hutt Central	4604	Central Ward	46	Lower Hutt City	09	Wellington Region	2.66986e+06	5.99796e+06	1	1968100	2	915	3	1
1969000	27	569100	Hutt Central	4604	Central Ward	46	Lower Hutt City	09	Wellington Region	2.67035e+06	5.99827e+06	1	1969000	4	944	9	2
526700	81	517800	Mt Albert Central	703	Eden-Albert Ward	7	Auckland City	02	Auckland Region	2.66403e+06	6.47894e+06	1	526700	6	994	28	2
395300	123	515002	Point Chevalier East	701	Western Bays Ward	7	Auckland City	02	Auckland Region	2.66262e+06	6.4811e+06	1	395300	1	897	41	1
789600	213	521802	Fairburn	706	Tamaki-Maungakiekie Ward	7	Auckland City	02	Auckland Region	2.67499e+06	6.47038e+06	1	789600	9	1115	96	3
789500	174	521802	Fairburn	706	Tamaki-Maungakiekie Ward	7	Auckland City	02	Auckland Region	2.67498e+06	6.4706e+06	1	789500	9	1110	78	3
788602	192	521802	Fairburn	706	Tamaki-Maungakiekie Ward	7	Auckland City	02	Auckland Region	2.67503e+06	6.4712e+06	1	788602	8	1068	86	3
526500	150	517800	Mt Albert Central	703	Eden-Albert Ward	7	Auckland City	02	Auckland Region	2.66379e+06	6.47894e+06	1	526500	2	915	50	1
2099300	183	574600	Wadestown	4703	Lambton Ward	47	Wellington City	09	Wellington Region	2.65931e+06	5.99226e+06	1	2099300	2	905	60	1
920302	99	528601	Dinsdale North	1601	West Ward	16	Hamilton City	03	Waikato Region	2.70796e+06	6.37633e+06	1	920302	5	962	35	2
2624000	3	594500	Waltham	6005	Hagley-Ferrymead Ward	60	Christchurch City	13	Canterbury Region	2.48161e+06	5.74022e+06	1	2624000	8	1049	1	3
2361700	105	584201	Richmond East	5105	Richmond Ward	51	Tasman District	16	Tasman Region	2.52581e+06	5.98527e+06	1	2361700	7	1020	37	2
395600	156	515002	Point Chevalier East	701	Western Bays Ward	7	Auckland City	02	Auckland Region	2.66279e+06	6.48087e+06	1	395600	4	953	55	2
1705600	72	557200	St Johns Hill	3702	Urban Ward	37	Wanganui District	08	Manawatu-Wanganui Region	2.68392e+06	6.14094e+06	1	1705600	3	930	24	1
2359604	90	581723	Saxton	5299	Area Outside Ward	52	Nelson City	17	Nelson Region	2.52862e+06	5.98763e+06	1	2359604	3	920	30	1
1968200	96	569100	Hutt Central	4604	Central Ward	46	Lower Hutt City	09	Wellington Region	2.67027e+06	5.99786e+06	1	1968200	2	915	32	1
1969200	135	569100	Hutt Central	4604	Central Ward	46	Lower Hutt City	09	Wellington Region	2.67074e+06	5.99816e+06	1	1969200	3	927	45	1
1969100	63	569100	Hutt Central	4604	Central Ward	46	Lower Hutt City	09	Wellington Region	2.67023e+06	5.9982e+06	1	1969100	7	1015	22	2
264000	108	511401	Fruitvale	604	New Lynn Ward	6	Waitakere City	02	Auckland Region	2.65918e+06	6.47455e+06	1	264000	9	1076	49	3
526801	42	517800	Mt Albert Central	703	Eden-Albert Ward	7	Auckland City	02	Auckland Region	2.66415e+06	6.47961e+06	1	526801	6	992	15	2
2512601	156	588200	Styx Mill	6001	Shirley-Papanui Ward	60	Christchurch City	13	Canterbury Region	2.4789e+06	5.74785e+06	1	2512601	9	1128	70	3
2362300	105	584201	Richmond East	5105	Richmond Ward	51	Tasman District	16	Tasman Region	2.52603e+06	5.98472e+06	1	2362300	8	1055	47	3
2361400	108	584201	Richmond East	5105	Richmond Ward	51	Tasman District	16	Tasman Region	2.52562e+06	5.98558e+06	1	2361400	8	1053	49	3
2886200	48	603910	Wakari	7104	Hills Ward	71	Dunedin City	14	Otago Region	2.31474e+06	5.47979e+06	1	2886200	5	969	17	2
1705700	72	557200	St Johns Hill	3702	Urban Ward	37	Wanganui District	08	Manawatu-Wanganui Region	2.6841e+06	6.14078e+06	1	1705700	1	887	24	1
527200	153	517800	Mt Albert Central	703	Eden-Albert Ward	7	Auckland City	02	Auckland Region	2.66347e+06	6.4786e+06	1	527200	6	980	54	2
1968400	120	569100	Hutt Central	4604	Central Ward	46	Lower Hutt City	09	Wellington Region	2.67023e+06	5.99774e+06	1	1968400	3	932	40	1
1968500	48	569100	Hutt Central	4604	Central Ward	46	Lower Hutt City	09	Wellington Region	2.67097e+06	5.99853e+06	1	1968500	7	1015	17	2
396200	141	515002	Point Chevalier East	701	Western Bays Ward	7	Auckland City	02	Auckland Region	2.6629e+06	6.48032e+06	1	396200	6	989	49	2
396100	159	515002	Point Chevalier East	701	Western Bays Ward	7	Auckland City	02	Auckland Region	2.66298e+06	6.4804e+06	1	396100	6	995	56	2
2119300	105	572900	Thorndon-Tinakori Road	4703	Lambton Ward	47	Wellington City	09	Wellington Region	2.65891e+06	5.9911e+06	1	2119300	7	1016	37	2
395500	114	515002	Point Chevalier East	701	Western Bays Ward	7	Auckland City	02	Auckland Region	2.66269e+06	6.48098e+06	1	395500	6	988	40	2
2624501	36	594500	Waltham	6005	Hagley-Ferrymead Ward	60	Christchurch City	13	Canterbury Region	2.48176e+06	5.73994e+06	1	2624501	9	1092	16	3
265300	120	511303	Lynnmall	604	New Lynn Ward	6	Waitakere City	02	Auckland Region	2.66091e+06	6.47506e+06	1	265300	8	1066	54	3
396400	87	515002	Point Chevalier East	701	Western Bays Ward	7	Auckland City	02	Auckland Region	2.66316e+06	6.4801e+06	1	396400	7	1019	30	2
2362100	126	584201	Richmond East	5105	Richmond Ward	51	Tasman District	16	Tasman Region	2.52623e+06	5.98504e+06	1	2362100	7	1018	44	2
2361800	195	584201	Richmond East	5105	Richmond Ward	51	Tasman District	16	Tasman Region	2.52595e+06	5.9854e+06	1	2361800	6	990	68	2
527400	216	517800	Mt Albert Central	703	Eden-Albert Ward	7	Auckland City	02	Auckland Region	2.6639e+06	6.4785e+06	1	527400	5	958	76	2
789300	141	521802	Fairburn	706	Tamaki-Maungakiekie Ward	7	Auckland City	02	Auckland Region	2.67488e+06	6.47093e+06	1	789300	10	1186	63	3
265200	3	511303	Lynnmall	604	New Lynn Ward	6	Waitakere City	02	Auckland Region	2.66101e+06	6.47552e+06	1	265200	8	1066	1	3
2099100	177	574600	Wadestown	4703	Lambton Ward	47	Wellington City	09	Wellington Region	2.65956e+06	5.99249e+06	1	2099100	2	909	58	1
396000	144	515002	Point Chevalier East	701	Western Bays Ward	7	Auckland City	02	Auckland Region	2.66266e+06	6.48056e+06	1	396000	4	940	50	2
2624200	159	594500	Waltham	6005	Hagley-Ferrymead Ward	60	Christchurch City	13	Canterbury Region	2.48185e+06	5.74e+06	1	2624200	9	1090	72	3
2886400	63	604010	Roslyn North	7104	Hills Ward	71	Dunedin City	14	Otago Region	2.31522e+06	5.48004e+06	1	2886400	7	1003	22	2
1706100	132	557200	St Johns Hill	3702	Urban Ward	37	Wanganui District	08	Manawatu-Wanganui Region	2.68378e+06	6.1405e+06	1	1706100	1	891	44	1
2361100	6	584201	Richmond East	5105	Richmond Ward	51	Tasman District	16	Tasman Region	2.52585e+06	5.98597e+06	1	2361100	8	1033	3	3
1705801	90	557200	St Johns Hill	3702	Urban Ward	37	Wanganui District	08	Manawatu-Wanganui Region	2.68347e+06	6.14129e+06	1	1705801	1	872	30	1
1706500	147	557200	St Johns Hill	3702	Urban Ward	37	Wanganui District	08	Manawatu-Wanganui Region	2.68388e+06	6.1412e+06	1	1706500	2	905	49	1
265000	348	511303	Lynnmall	604	New Lynn Ward	6	Waitakere City	02	Auckland Region	2.66065e+06	6.47519e+06	1	265000	9	1087	157	3
2359704	135	581715	Ngawhatu	5299	Area Outside Ward	52	Nelson City	17	Nelson Region	2.52887e+06	5.98733e+06	1	2359704	1	865	45	1
1968001	99	569100	Hutt Central	4604	Central Ward	46	Lower Hutt City	09	Wellington Region	2.67054e+06	5.998e+06	1	1968001	5	960	35	2
394900	168	515002	Point Chevalier East	701	Western Bays Ward	7	Auckland City	02	Auckland Region	2.66247e+06	6.48136e+06	1	394900	4	937	59	2
2512604	159	588200	Styx Mill	6001	Shirley-Papanui Ward	60	Christchurch City	13	Canterbury Region	2.4789e+06	5.74758e+06	1	2512604	9	1099	72	3
2099901	21	574600	Wadestown	4703	Lambton Ward	47	Wellington City	09	Wellington Region	2.65893e+06	5.99279e+06	1	2099901	2	909	7	1
2624602	39	594500	Waltham	6006	Spreydon-Heathcote Ward	60	Christchurch City	13	Canterbury Region	2.48186e+06	5.73978e+06	1	2624602	10	1143	18	3
526802	30	517800	Mt Albert Central	703	Eden-Albert Ward	7	Auckland City	02	Auckland Region	2.66427e+06	6.47956e+06	1	526802	6	992	10	2
527500	57	517800	Mt Albert Central	703	Eden-Albert Ward	7	Auckland City	02	Auckland Region	2.66337e+06	6.47843e+06	1	527500	6	983	20	2
2624100	3	594500	Waltham	6005	Hagley-Ferrymead Ward	60	Christchurch City	13	Canterbury Region	2.48189e+06	5.74013e+06	1	2624100	9	1090	1	3
2886000	129	603910	Wakari	7104	Hills Ward	71	Dunedin City	14	Otago Region	2.31457e+06	5.47992e+06	1	2886000	5	969	45	2
2361600	57	584201	Richmond East	5105	Richmond Ward	51	Tasman District	16	Tasman Region	2.52573e+06	5.98513e+06	1	2361600	7	1017	20	2
1705803	150	557200	St Johns Hill	3702	Urban Ward	37	Wanganui District	08	Manawatu-Wanganui Region	2.68376e+06	6.14088e+06	1	1705803	2	916	50	1
526600	213	517800	Mt Albert Central	703	Eden-Albert Ward	7	Auckland City	02	Auckland Region	2.66399e+06	6.47882e+06	1	526600	5	973	75	2
527000	105	517800	Mt Albert Central	703	Eden-Albert Ward	7	Auckland City	02	Auckland Region	2.66385e+06	6.4787e+06	1	527000	9	1098	47	3
526900	186	517800	Mt Albert Central	703	Eden-Albert Ward	7	Auckland City	02	Auckland Region	2.66362e+06	6.47878e+06	1	526900	6	980	65	2
395100	225	515002	Point Chevalier East	701	Western Bays Ward	7	Auckland City	02	Auckland Region	2.66258e+06	6.48125e+06	1	395100	1	890	74	1
1968002	57	569100	Hutt Central	4604	Central Ward	46	Lower Hutt City	09	Wellington Region	2.67052e+06	5.99791e+06	1	1968002	5	960	20	2
526200	246	517800	Mt Albert Central	703	Eden-Albert Ward	7	Auckland City	02	Auckland Region	2.66395e+06	6.47919e+06	1	526200	7	1011	86	2
1968900	96	569100	Hutt Central	4604	Central Ward	46	Lower Hutt City	09	Wellington Region	2.67056e+06	5.99827e+06	1	1968900	3	927	32	1
264101	87	511401	Fruitvale	604	New Lynn Ward	6	Waitakere City	02	Auckland Region	2.65929e+06	6.47471e+06	1	264101	8	1034	39	3
395400	189	515002	Point Chevalier East	701	Western Bays Ward	7	Auckland City	02	Auckland Region	2.66244e+06	6.48086e+06	1	395400	5	960	66	2
263802	42	511401	Fruitvale	604	New Lynn Ward	6	Waitakere City	02	Auckland Region	2.65926e+06	6.47483e+06	1	263802	9	1126	19	3
789400	273	521802	Fairburn	706	Tamaki-Maungakiekie Ward	7	Auckland City	02	Auckland Region	2.67481e+06	6.47068e+06	1	789400	9	1098	123	3
788601	189	521802	Fairburn	706	Tamaki-Maungakiekie Ward	7	Auckland City	02	Auckland Region	2.67479e+06	6.47117e+06	1	788601	10	1415	85	3
395700	192	515002	Point Chevalier East	701	Western Bays Ward	7	Auckland City	02	Auckland Region	2.66253e+06	6.48072e+06	1	395700	5	967	67	2
395000	99	515002	Point Chevalier East	701	Western Bays Ward	7	Auckland City	02	Auckland Region	2.6623e+06	6.48124e+06	1	395000	1	897	33	1
264901	9	511303	Lynnmall	604	New Lynn Ward	6	Waitakere City	02	Auckland Region	2.66012e+06	6.47555e+06	1	264901	7	1017	3	2
526300	117	517800	Mt Albert Central	703	Eden-Albert Ward	7	Auckland City	02	Auckland Region	2.66372e+06	6.47911e+06	1	526300	7	1013	41	2
265100	6	511303	Lynnmall	604	New Lynn Ward	6	Waitakere City	02	Auckland Region	2.66079e+06	6.47558e+06	1	265100	8	1066	3	3
1485800	153	547700	St Leonards	3005	Hastings Ward	30	Hastings District	06	Hawke's Bay Region	2.83925e+06	6.16817e+06	1	1485800	10	1176	69	3
2623300	234	594600	Sydenham	6006	Spreydon-Heathcote Ward	60	Christchurch City	13	Canterbury Region	2.48143e+06	5.73892e+06	1	2623300	9	1083	105	3
2623100	69	594600	Sydenham	6006	Spreydon-Heathcote Ward	60	Christchurch City	13	Canterbury Region	2.48163e+06	5.73929e+06	1	2623100	6	988	24	2
526100	117	517800	Mt Albert Central	703	Eden-Albert Ward	7	Auckland City	02	Auckland Region	2.66381e+06	6.47932e+06	1	526100	2	900	39	1
527300	192	517800	Mt Albert Central	703	Eden-Albert Ward	7	Auckland City	02	Auckland Region	2.6637e+06	6.47861e+06	1	527300	8	1054	86	3
2624301	78	594500	Waltham	6005	Hagley-Ferrymead Ward	60	Christchurch City	13	Canterbury Region	2.48156e+06	5.74008e+06	1	2624301	10	1145	35	3
2361300	51	584201	Richmond East	5105	Richmond Ward	51	Tasman District	16	Tasman Region	2.52545e+06	5.98547e+06	1	2361300	8	1053	23	3
2361500	162	584201	Richmond East	5105	Richmond Ward	51	Tasman District	16	Tasman Region	2.52579e+06	5.9855e+06	1	2361500	8	1059	73	3
1706000	78	557200	St Johns Hill	3702	Urban Ward	37	Wanganui District	08	Manawatu-Wanganui Region	2.68366e+06	6.14072e+06	1	1706000	3	930	26	1
1705900	93	557200	St Johns Hill	3702	Urban Ward	37	Wanganui District	08	Manawatu-Wanganui Region	2.68395e+06	6.14067e+06	1	1705900	2	902	31	1
396300	171	515002	Point Chevalier East	701	Western Bays Ward	7	Auckland City	02	Auckland Region	2.66281e+06	6.48027e+06	1	396300	4	936	60	2
263801	108	511401	Fruitvale	604	New Lynn Ward	6	Waitakere City	02	Auckland Region	2.65929e+06	6.47491e+06	1	263801	9	1126	49	3
1968600	147	569100	Hutt Central	4604	Central Ward	46	Lower Hutt City	09	Wellington Region	2.67072e+06	5.99845e+06	1	1968600	3	932	49	1
395200	132	515002	Point Chevalier East	701	Western Bays Ward	7	Auckland City	02	Auckland Region	2.66232e+06	6.48106e+06	1	395200	4	946	46	2
527100	123	517800	Mt Albert Central	703	Eden-Albert Ward	7	Auckland City	02	Auckland Region	2.66408e+06	6.47863e+06	1	527100	6	992	43	2
789100	234	521802	Fairburn	706	Tamaki-Maungakiekie Ward	7	Auckland City	02	Auckland Region	2.67507e+06	6.47084e+06	1	789100	9	1075	105	3
2624402	63	594500	Waltham	6006	Spreydon-Heathcote Ward	60	Christchurch City	13	Canterbury Region	2.4816e+06	5.73984e+06	1	2624402	9	1130	28	3
2624302	48	594500	Waltham	6006	Spreydon-Heathcote Ward	60	Christchurch City	13	Canterbury Region	2.48153e+06	5.73987e+06	1	2624302	10	1145	22	3
2624601	30	594500	Waltham	6005	Hagley-Ferrymead Ward	60	Christchurch City	13	Canterbury Region	2.48191e+06	5.7399e+06	1	2624601	10	1143	14	3
529800	105	517500	Kingsland	703	Eden-Albert Ward	7	Auckland City	02	Auckland Region	2.66604e+06	6.47969e+06	1	529800	10	1163	47	3
2366107	27	584202	Richmond West	5105	Richmond Ward	51	Tasman District	16	Tasman Region	2.52555e+06	5.98466e+06	1	2366107	1	890	9	1
2365711	165	584202	Richmond West	5105	Richmond Ward	51	Tasman District	16	Tasman Region	2.52429e+06	5.98453e+06	1	2365711	4	940	58	2
2365001	33	584202	Richmond West	5105	Richmond Ward	51	Tasman District	16	Tasman Region	2.52462e+06	5.98505e+06	1	2365001	7	1001	12	2
2365002	108	584202	Richmond West	5105	Richmond Ward	51	Tasman District	16	Tasman Region	2.5247e+06	5.98497e+06	1	2365002	7	1001	38	2
2888100	90	603920	Halfway Bush	7104	Hills Ward	71	Dunedin City	14	Otago Region	2.31303e+06	5.48012e+06	1	2888100	9	1132	40	3
2363205	258	584201	Richmond East	5105	Richmond Ward	51	Tasman District	16	Tasman Region	2.52689e+06	5.9856e+06	1	2363205	1	897	85	1
2889100	93	603920	Halfway Bush	7104	Hills Ward	71	Dunedin City	14	Otago Region	2.31326e+06	5.48062e+06	1	2889100	4	947	33	2
659400	102	524601	Manukau Central	802	Papatoetoe Ward	8	Manukau City	02	Auckland Region	2.67511e+06	6.46617e+06	1	659400	9	1113	46	3
660200	195	522100	Papatoetoe West	802	Papatoetoe Ward	8	Manukau City	02	Auckland Region	2.67503e+06	6.46631e+06	1	660200	7	1027	68	2
1970400	84	569100	Hutt Central	4604	Central Ward	46	Lower Hutt City	09	Wellington Region	2.67007e+06	5.99734e+06	1	1970400	1	869	28	1
1970500	96	569100	Hutt Central	4604	Central Ward	46	Lower Hutt City	09	Wellington Region	2.67032e+06	5.99724e+06	1	1970500	1	875	32	1
1969600	126	569100	Hutt Central	4604	Central Ward	46	Lower Hutt City	09	Wellington Region	2.67112e+06	5.998e+06	1	1969600	4	948	44	2
1970700	99	568601	Waterloo West	4604	Central Ward	46	Lower Hutt City	09	Wellington Region	2.67105e+06	5.99763e+06	1	1970700	3	927	33	1
1969900	99	569100	Hutt Central	4604	Central Ward	46	Lower Hutt City	09	Wellington Region	2.67057e+06	5.99766e+06	1	1969900	4	947	35	2
1970000	165	569100	Hutt Central	4604	Central Ward	46	Lower Hutt City	09	Wellington Region	2.67008e+06	5.99762e+06	1	1970000	2	901	54	1
1840000	72	562500	Roslyn	4001	Papaioea Ward	40	Palmerston North City	08	Manawatu-Wanganui Region	2.73354e+06	6.09367e+06	1	1840000	10	1169	32	3
528000	111	517800	Mt Albert Central	703	Eden-Albert Ward	7	Auckland City	02	Auckland Region	2.66435e+06	6.47868e+06	1	528000	9	1095	50	3
397500	63	515002	Point Chevalier East	701	Western Bays Ward	7	Auckland City	02	Auckland Region	2.66346e+06	6.48026e+06	1	397500	3	935	21	1
2626400	126	594400	St Martins	6006	Spreydon-Heathcote Ward	60	Christchurch City	13	Canterbury Region	2.48228e+06	5.73846e+06	1	2626400	3	930	42	1
2625100	174	594400	St Martins	6006	Spreydon-Heathcote Ward	60	Christchurch City	13	Canterbury Region	2.48181e+06	5.73876e+06	1	2625100	3	920	57	1
922100	114	530400	Bader	1603	South Ward	16	Hamilton City	03	Waikato Region	2.71123e+06	6.37466e+06	1	922100	9	1111	51	3
922200	120	530400	Bader	1603	South Ward	16	Hamilton City	03	Waikato Region	2.71139e+06	6.37463e+06	1	922200	6	983	42	2
397400	108	515002	Point Chevalier East	701	Western Bays Ward	7	Auckland City	02	Auckland Region	2.66354e+06	6.48019e+06	1	397400	3	935	36	1
2887800	99	603920	Halfway Bush	7104	Hills Ward	71	Dunedin City	14	Otago Region	2.31335e+06	5.48043e+06	1	2887800	5	967	35	2
2887500	39	603920	Halfway Bush	7104	Hills Ward	71	Dunedin City	14	Otago Region	2.31296e+06	5.48056e+06	1	2887500	9	1088	18	3
1839902	129	562200	Kelvin Grove	4001	Papaioea Ward	40	Palmerston North City	08	Manawatu-Wanganui Region	2.73566e+06	6.09347e+06	1	1839902	4	939	45	2
527600	81	517800	Mt Albert Central	703	Eden-Albert Ward	7	Auckland City	02	Auckland Region	2.66362e+06	6.47844e+06	1	527600	6	983	28	2
2625500	93	594400	St Martins	6006	Spreydon-Heathcote Ward	60	Christchurch City	13	Canterbury Region	2.48214e+06	5.73845e+06	1	2625500	3	920	31	1
922000	87	530400	Bader	1603	South Ward	16	Hamilton City	03	Waikato Region	2.71106e+06	6.37458e+06	1	922000	7	1029	30	2
2624900	180	594400	St Martins	6006	Spreydon-Heathcote Ward	60	Christchurch City	13	Canterbury Region	2.48169e+06	5.739e+06	1	2624900	4	937	63	2
921504	108	528602	Dinsdale South	1601	West Ward	16	Hamilton City	03	Waikato Region	2.70776e+06	6.37552e+06	1	921504	4	943	38	2
921604	297	528602	Dinsdale South	1601	West Ward	16	Hamilton City	03	Waikato Region	2.70805e+06	6.37543e+06	1	921604	8	1066	134	3
528700	90	517800	Mt Albert Central	703	Eden-Albert Ward	7	Auckland City	02	Auckland Region	2.66415e+06	6.47752e+06	1	528700	2	912	30	1
2363000	123	584201	Richmond East	5105	Richmond Ward	51	Tasman District	16	Tasman Region	2.52603e+06	5.98556e+06	1	2363000	10	1141	55	3
398200	99	515100	Westmere	701	Western Bays Ward	7	Auckland City	02	Auckland Region	2.6642e+06	6.48096e+06	1	398200	4	940	35	2
2363102	270	584201	Richmond East	5105	Richmond Ward	51	Tasman District	16	Tasman Region	2.52645e+06	5.98574e+06	1	2363102	5	958	94	2
2888300	129	603920	Halfway Bush	7104	Hills Ward	71	Dunedin City	14	Otago Region	2.31366e+06	5.48013e+06	1	2888300	9	1078	58	3
659200	225	522100	Papatoetoe West	802	Papatoetoe Ward	8	Manukau City	02	Auckland Region	2.67487e+06	6.46641e+06	1	659200	8	1036	101	3
1970200	132	569100	Hutt Central	4604	Central Ward	46	Lower Hutt City	09	Wellington Region	2.67039e+06	5.99751e+06	1	1970200	1	847	44	1
1970800	180	568601	Waterloo West	4604	Central Ward	46	Lower Hutt City	09	Wellington Region	2.67085e+06	5.99757e+06	1	1970800	8	1032	81	3
266700	75	511303	Lynnmall	604	New Lynn Ward	6	Waitakere City	02	Auckland Region	2.66036e+06	6.47606e+06	1	266700	8	1058	34	3
396500	51	515002	Point Chevalier East	701	Western Bays Ward	7	Auckland City	02	Auckland Region	2.66306e+06	6.48006e+06	1	396500	8	1037	23	3
2626000	156	594400	St Martins	6006	Spreydon-Heathcote Ward	60	Christchurch City	13	Canterbury Region	2.48206e+06	5.73899e+06	1	2626000	3	932	51	1
922300	117	530400	Bader	1603	South Ward	16	Hamilton City	03	Waikato Region	2.71175e+06	6.37472e+06	1	922300	9	1123	53	3
922400	81	530400	Bader	1603	South Ward	16	Hamilton City	03	Waikato Region	2.71208e+06	6.37479e+06	1	922400	9	1123	36	3
265500	81	511303	Lynnmall	604	New Lynn Ward	6	Waitakere City	02	Auckland Region	2.66093e+06	6.47485e+06	1	265500	9	1097	36	3
1969800	162	569100	Hutt Central	4604	Central Ward	46	Lower Hutt City	09	Wellington Region	2.67075e+06	5.99773e+06	1	1969800	4	936	57	2
529200	156	517500	Kingsland	703	Eden-Albert Ward	7	Auckland City	02	Auckland Region	2.66644e+06	6.48011e+06	1	529200	5	969	55	2
528800	102	517800	Mt Albert Central	703	Eden-Albert Ward	7	Auckland City	02	Auckland Region	2.66395e+06	6.47804e+06	1	528800	1	878	34	1
1839906	39	562200	Kelvin Grove	4001	Papaioea Ward	40	Palmerston North City	08	Manawatu-Wanganui Region	2.7361e+06	6.09348e+06	1	1839906	2	912	13	1
2625300	102	594400	St Martins	6006	Spreydon-Heathcote Ward	60	Christchurch City	13	Canterbury Region	2.48204e+06	5.73865e+06	1	2625300	3	920	34	1
2100400	165	574600	Wadestown	4703	Lambton Ward	47	Wellington City	09	Wellington Region	2.65792e+06	5.99218e+06	1	2100400	1	894	54	1
2625800	168	594400	St Martins	6006	Spreydon-Heathcote Ward	60	Christchurch City	13	Canterbury Region	2.48212e+06	5.73928e+06	1	2625800	5	966	59	2
528201	129	517800	Mt Albert Central	703	Eden-Albert Ward	7	Auckland City	02	Auckland Region	2.66441e+06	6.47857e+06	1	528201	7	1002	45	2
921100	75	528602	Dinsdale South	1601	West Ward	16	Hamilton City	03	Waikato Region	2.708e+06	6.37608e+06	1	921100	8	1050	34	3
2888500	108	603920	Halfway Bush	7104	Hills Ward	71	Dunedin City	14	Otago Region	2.31289e+06	5.48076e+06	1	2888500	3	923	36	1
2887300	90	603920	Halfway Bush	7104	Hills Ward	71	Dunedin City	14	Otago Region	2.31277e+06	5.48043e+06	1	2887300	5	965	31	2
398000	147	515100	Westmere	701	Western Bays Ward	7	Auckland City	02	Auckland Region	2.66406e+06	6.48095e+06	1	398000	7	1012	51	2
1971000	108	568601	Waterloo West	4604	Central Ward	46	Lower Hutt City	09	Wellington Region	2.67079e+06	5.99738e+06	1	1971000	3	927	36	1
266900	15	511301	New Lynn North	604	New Lynn Ward	6	Waitakere City	02	Auckland Region	2.65997e+06	6.4757e+06	1	266900	8	1058	7	3
528400	162	517800	Mt Albert Central	703	Eden-Albert Ward	7	Auckland City	02	Auckland Region	2.66393e+06	6.47819e+06	1	528400	1	879	53	1
2625200	99	594400	St Martins	6006	Spreydon-Heathcote Ward	60	Christchurch City	13	Canterbury Region	2.4819e+06	5.73859e+06	1	2625200	6	988	35	2
2626200	117	594400	St Martins	6006	Spreydon-Heathcote Ward	60	Christchurch City	13	Canterbury Region	2.48233e+06	5.73887e+06	1	2626200	2	909	39	1
2625700	120	594400	St Martins	6006	Spreydon-Heathcote Ward	60	Christchurch City	13	Canterbury Region	2.48191e+06	5.7392e+06	1	2625700	7	1009	42	2
2625900	210	594400	St Martins	6006	Spreydon-Heathcote Ward	60	Christchurch City	13	Canterbury Region	2.48228e+06	5.73915e+06	1	2625900	3	921	69	1
528601	75	517800	Mt Albert Central	703	Eden-Albert Ward	7	Auckland City	02	Auckland Region	2.66414e+06	6.47827e+06	1	528601	3	934	25	1
528500	123	517800	Mt Albert Central	703	Eden-Albert Ward	7	Auckland City	02	Auckland Region	2.6638e+06	6.47804e+06	1	528500	3	934	41	1
397200	99	515002	Point Chevalier East	701	Western Bays Ward	7	Auckland City	02	Auckland Region	2.66335e+06	6.48023e+06	1	397200	4	950	35	2
2887400	90	603920	Halfway Bush	7104	Hills Ward	71	Dunedin City	14	Otago Region	2.31299e+06	5.48061e+06	1	2887400	4	951	31	2
659100	306	522100	Papatoetoe West	802	Papatoetoe Ward	8	Manukau City	02	Auckland Region	2.67467e+06	6.46625e+06	1	659100	9	1111	138	3
658800	150	524303	Kohuora	802	Papatoetoe Ward	8	Manukau City	02	Auckland Region	2.67399e+06	6.4667e+06	1	658800	8	1046	68	3
266800	207	511301	New Lynn North	604	New Lynn Ward	6	Waitakere City	02	Auckland Region	2.66007e+06	6.47594e+06	1	266800	8	1058	93	3
397300	147	515002	Point Chevalier East	701	Western Bays Ward	7	Auckland City	02	Auckland Region	2.66329e+06	6.48013e+06	1	397300	6	984	51	2
921700	291	528602	Dinsdale South	1601	West Ward	16	Hamilton City	03	Waikato Region	2.70762e+06	6.37516e+06	1	921700	8	1031	131	3
921607	204	528602	Dinsdale South	1601	West Ward	16	Hamilton City	03	Waikato Region	2.70815e+06	6.37524e+06	1	921607	9	1101	92	3
2100800	75	574600	Wadestown	4703	Lambton Ward	47	Wellington City	09	Wellington Region	2.65807e+06	5.99243e+06	1	2100800	1	896	25	1
2624700	93	594500	Waltham	6006	Spreydon-Heathcote Ward	60	Christchurch City	13	Canterbury Region	2.48158e+06	5.73957e+06	1	2624700	10	1143	42	3
398100	60	515100	Westmere	701	Western Bays Ward	7	Auckland City	02	Auckland Region	2.6641e+06	6.48079e+06	1	398100	5	956	21	2
527800	102	517800	Mt Albert Central	703	Eden-Albert Ward	7	Auckland City	02	Auckland Region	2.66344e+06	6.47833e+06	1	527800	4	948	36	2
2364300	51	584202	Richmond West	5105	Richmond Ward	51	Tasman District	16	Tasman Region	2.52508e+06	5.98535e+06	1	2364300	8	1050	23	3
2887700	87	603920	Halfway Bush	7104	Hills Ward	71	Dunedin City	14	Otago Region	2.3132e+06	5.48036e+06	1	2887700	6	980	30	2
2887600	105	603920	Halfway Bush	7104	Hills Ward	71	Dunedin City	14	Otago Region	2.31286e+06	5.48036e+06	1	2887600	9	1088	47	3
659300	60	524601	Manukau Central	802	Papatoetoe Ward	8	Manukau City	02	Auckland Region	2.67478e+06	6.46607e+06	1	659300	9	1111	27	3
658600	222	522100	Papatoetoe West	802	Papatoetoe Ward	8	Manukau City	02	Auckland Region	2.67423e+06	6.4666e+06	1	658600	9	1104	100	3
658700	69	524303	Kohuora	802	Papatoetoe Ward	8	Manukau City	02	Auckland Region	2.6741e+06	6.46669e+06	1	658700	9	1104	31	3
2495300	198	587812	Broomfield	6004	Riccarton-Wigram Ward	60	Christchurch City	13	Canterbury Region	2.47245e+06	5.74277e+06	1	2495300	5	967	69	2
1970600	144	569100	Hutt Central	4604	Central Ward	46	Lower Hutt City	09	Wellington Region	2.67e+06	5.99718e+06	1	1970600	1	875	48	1
1970100	213	569100	Hutt Central	4604	Central Ward	46	Lower Hutt City	09	Wellington Region	2.6702e+06	5.99751e+06	1	1970100	1	897	70	1
1970300	132	569100	Hutt Central	4604	Central Ward	46	Lower Hutt City	09	Wellington Region	2.6699e+06	5.99744e+06	1	1970300	1	869	44	1
528202	171	517800	Mt Albert Central	703	Eden-Albert Ward	7	Auckland City	02	Auckland Region	2.66452e+06	6.47847e+06	1	528202	7	1019	60	2
1969700	87	569100	Hutt Central	4604	Central Ward	46	Lower Hutt City	09	Wellington Region	2.6709e+06	5.99785e+06	1	1969700	4	947	30	2
527700	123	517800	Mt Albert Central	703	Eden-Albert Ward	7	Auckland City	02	Auckland Region	2.6638e+06	6.47831e+06	1	527700	2	912	41	1
528300	159	517800	Mt Albert Central	703	Eden-Albert Ward	7	Auckland City	02	Auckland Region	2.66407e+06	6.47835e+06	1	528300	3	931	52	1
528100	102	517800	Mt Albert Central	703	Eden-Albert Ward	7	Auckland City	02	Auckland Region	2.66421e+06	6.47858e+06	1	528100	4	941	36	2
265400	195	511303	Lynnmall	604	New Lynn Ward	6	Waitakere City	02	Auckland Region	2.66107e+06	6.47485e+06	1	265400	9	1136	88	3
1161104	213	537301	Brookfield	2302	Otumoetai-Bethlehem Ward	23	Tauranga City	04	Bay of Plenty Region	2.78625e+06	6.38494e+06	1	1161104	9	1077	96	3
266500	15	511303	Lynnmall	604	New Lynn Ward	6	Waitakere City	02	Auckland Region	2.66039e+06	6.47633e+06	1	266500	8	1060	7	3
2625400	135	594400	St Martins	6006	Spreydon-Heathcote Ward	60	Christchurch City	13	Canterbury Region	2.48195e+06	5.73844e+06	1	2625400	3	932	45	1
266200	18	511303	Lynnmall	604	New Lynn Ward	6	Waitakere City	02	Auckland Region	2.66087e+06	6.47592e+06	1	266200	8	1058	8	3
921605	189	528602	Dinsdale South	1601	West Ward	16	Hamilton City	03	Waikato Region	2.70832e+06	6.37546e+06	1	921605	8	1047	85	3
2624800	279	594500	Waltham	6006	Spreydon-Heathcote Ward	60	Christchurch City	13	Canterbury Region	2.48176e+06	5.73963e+06	1	2624800	9	1094	126	3
920800	108	528601	Dinsdale North	1601	West Ward	16	Hamilton City	03	Waikato Region	2.70789e+06	6.37622e+06	1	920800	5	966	38	2
396600	51	515002	Point Chevalier East	701	Western Bays Ward	7	Auckland City	02	Auckland Region	2.66296e+06	6.47999e+06	1	396600	8	1070	23	3
529000	57	517500	Kingsland	703	Eden-Albert Ward	7	Auckland City	02	Auckland Region	2.66656e+06	6.48017e+06	1	529000	4	950	20	2
529300	135	517500	Kingsland	703	Eden-Albert Ward	7	Auckland City	02	Auckland Region	2.6663e+06	6.48003e+06	1	529300	7	1004	47	2
1839702	18	562200	Kelvin Grove	4001	Papaioea Ward	40	Palmerston North City	08	Manawatu-Wanganui Region	2.73474e+06	6.09273e+06	1	1839702	1	879	6	1
396900	90	515002	Point Chevalier East	701	Western Bays Ward	7	Auckland City	02	Auckland Region	2.66329e+06	6.48051e+06	1	396900	4	950	31	2
1944904	84	568401	Avalon West	4604	Central Ward	46	Lower Hutt City	09	Wellington Region	2.67342e+06	5.99996e+06	1	1944904	2	906	28	1
529100	51	517500	Kingsland	703	Eden-Albert Ward	7	Auckland City	02	Auckland Region	2.6665e+06	6.48017e+06	1	529100	4	950	18	2
2626300	99	594400	St Martins	6006	Spreydon-Heathcote Ward	60	Christchurch City	13	Canterbury Region	2.48223e+06	5.73872e+06	1	2626300	8	1031	45	3
2626100	117	594400	St Martins	6006	Spreydon-Heathcote Ward	60	Christchurch City	13	Canterbury Region	2.48231e+06	5.73897e+06	1	2626100	4	947	41	2
2100700	60	574600	Wadestown	4703	Lambton Ward	47	Wellington City	09	Wellington Region	2.65814e+06	5.99234e+06	1	2100700	2	900	20	1
921800	123	528602	Dinsdale South	1601	West Ward	16	Hamilton City	03	Waikato Region	2.70784e+06	6.37542e+06	1	921800	6	984	43	2
921606	135	528602	Dinsdale South	1601	West Ward	16	Hamilton City	03	Waikato Region	2.70849e+06	6.37545e+06	1	921606	9	1104	61	3
921503	207	528602	Dinsdale South	1601	West Ward	16	Hamilton City	03	Waikato Region	2.70752e+06	6.37541e+06	1	921503	6	991	72	2
2364200	129	584202	Richmond West	5105	Richmond Ward	51	Tasman District	16	Tasman Region	2.52534e+06	5.98507e+06	1	2364200	9	1103	58	3
2887900	69	603920	Halfway Bush	7104	Hills Ward	71	Dunedin City	14	Otago Region	2.31331e+06	5.48026e+06	1	2887900	6	980	24	2
372104	177	514600	Avondale South	702	Avondale-Roskill Ward	7	Auckland City	02	Auckland Region	2.66191e+06	6.4752e+06	1	372104	6	990	62	2
397600	3	515002	Point Chevalier East	701	Western Bays Ward	7	Auckland City	02	Auckland Region	2.66403e+06	6.48012e+06	1	397600	9	1073	1	3
527900	162	517800	Mt Albert Central	703	Eden-Albert Ward	7	Auckland City	02	Auckland Region	2.66364e+06	6.47817e+06	1	527900	2	910	53	1
1969300	147	569100	Hutt Central	4604	Central Ward	46	Lower Hutt City	09	Wellington Region	2.67064e+06	5.99806e+06	1	1969300	1	874	49	1
1838303	3	562100	Milson	4001	Papaioea Ward	40	Palmerston North City	08	Manawatu-Wanganui Region	2.73323e+06	6.09462e+06	1	1838303	6	998	1	2
397900	63	515100	Westmere	701	Western Bays Ward	7	Auckland City	02	Auckland Region	2.66388e+06	6.48102e+06	1	397900	7	1012	22	2
2625000	93	594400	St Martins	6006	Spreydon-Heathcote Ward	60	Christchurch City	13	Canterbury Region	2.48183e+06	5.73896e+06	1	2625000	6	988	33	2
266400	150	511303	Lynnmall	604	New Lynn Ward	6	Waitakere City	02	Auckland Region	2.66027e+06	6.47601e+06	1	266400	8	1058	68	3
2498901	36	587500	Hornby South	6004	Riccarton-Wigram Ward	60	Christchurch City	13	Canterbury Region	2.47067e+06	5.7401e+06	1	2498901	3	927	12	1
2498200	141	587830	Islington	6004	Riccarton-Wigram Ward	60	Christchurch City	13	Canterbury Region	2.47045e+06	5.74031e+06	1	2498200	4	944	49	2
1712500	153	555700	Castlecliff North	3702	Urban Ward	37	Wanganui District	08	Manawatu-Wanganui Region	2.67917e+06	6.13916e+06	1	1712500	10	1215	69	3
2497600	246	587830	Islington	6004	Riccarton-Wigram Ward	60	Christchurch City	13	Canterbury Region	2.47012e+06	5.74075e+06	1	2497600	6	987	86	2
1711800	135	555700	Castlecliff North	3702	Urban Ward	37	Wanganui District	08	Manawatu-Wanganui Region	2.67892e+06	6.13977e+06	1	1711800	9	1125	61	3
2889300	165	603920	Halfway Bush	7104	Hills Ward	71	Dunedin City	14	Otago Region	2.31353e+06	5.48061e+06	1	2889300	5	959	58	2
2891300	174	603500	Woodhaugh	7103	Cargill Ward	71	Dunedin City	14	Otago Region	2.31668e+06	5.48059e+06	1	2891300	9	1105	78	3
529900	204	517500	Kingsland	703	Eden-Albert Ward	7	Auckland City	02	Auckland Region	2.66557e+06	6.4799e+06	1	529900	6	981	71	2
398300	51	515100	Westmere	701	Western Bays Ward	7	Auckland City	02	Auckland Region	2.66426e+06	6.48087e+06	1	398300	4	940	18	2
1971600	84	568602	Waterloo East	4605	Eastern Ward	46	Lower Hutt City	09	Wellington Region	2.67106e+06	5.99725e+06	1	1971600	5	961	29	2
1972900	78	568602	Waterloo East	4605	Eastern Ward	46	Lower Hutt City	09	Wellington Region	2.67149e+06	5.99735e+06	1	1972900	7	1016	27	2
530500	153	517500	Kingsland	703	Eden-Albert Ward	7	Auckland City	02	Auckland Region	2.66579e+06	6.47967e+06	1	530500	4	943	54	2
1841000	87	562500	Roslyn	4001	Papaioea Ward	40	Palmerston North City	08	Manawatu-Wanganui Region	2.73333e+06	6.09371e+06	1	1841000	10	1291	39	3
531100	144	517500	Kingsland	703	Eden-Albert Ward	7	Auckland City	02	Auckland Region	2.66642e+06	6.47957e+06	1	531100	7	1001	50	2
2626500	42	594400	St Martins	6006	Spreydon-Heathcote Ward	60	Christchurch City	13	Canterbury Region	2.48247e+06	5.73824e+06	1	2626500	8	1031	19	3
2365713	195	584202	Richmond West	5105	Richmond Ward	51	Tasman District	16	Tasman Region	2.52449e+06	5.98428e+06	1	2365713	1	882	64	1
2365710	66	584202	Richmond West	5105	Richmond Ward	51	Tasman District	16	Tasman Region	2.52445e+06	5.98451e+06	1	2365710	9	1108	30	3
267500	69	511301	New Lynn North	604	New Lynn Ward	6	Waitakere City	02	Auckland Region	2.65986e+06	6.4761e+06	1	267500	7	1030	24	2
267602	198	511301	New Lynn North	604	New Lynn Ward	6	Waitakere City	02	Auckland Region	2.66001e+06	6.47602e+06	1	267602	10	1253	89	3
2365501	60	584202	Richmond West	5105	Richmond Ward	51	Tasman District	16	Tasman Region	2.52385e+06	5.98482e+06	1	2365501	3	932	20	1
267400	93	511301	New Lynn North	604	New Lynn Ward	6	Waitakere City	02	Auckland Region	2.65989e+06	6.47625e+06	1	267400	7	1013	33	2
530600	156	517500	Kingsland	703	Eden-Albert Ward	7	Auckland City	02	Auckland Region	2.66548e+06	6.47952e+06	1	530600	7	1020	55	2
1841700	156	562500	Roslyn	4001	Papaioea Ward	40	Palmerston North City	08	Manawatu-Wanganui Region	2.73358e+06	6.09327e+06	1	1841700	10	1169	70	3
1841401	15	562500	Roslyn	4001	Papaioea Ward	40	Palmerston North City	08	Manawatu-Wanganui Region	2.73387e+06	6.09356e+06	1	1841401	5	960	5	2
2103400	183	574700	Wilton-Otari	4702	Onslow-Western Ward	47	Wellington City	09	Wellington Region	2.65775e+06	5.99166e+06	1	2103400	5	954	64	2
1448200	93	547400	Pirimai	3199	Area Outside Ward	31	Napier City	06	Hawke's Bay Region	2.84343e+06	6.18086e+06	1	1448200	5	957	33	2
2366103	48	584202	Richmond West	5105	Richmond Ward	51	Tasman District	16	Tasman Region	2.52573e+06	5.9848e+06	1	2366103	4	948	17	2
2888600	75	603920	Halfway Bush	7104	Hills Ward	71	Dunedin City	14	Otago Region	2.31315e+06	5.48084e+06	1	2888600	5	968	26	2
1971400	159	568602	Waterloo East	4605	Eastern Ward	46	Lower Hutt City	09	Wellington Region	2.67128e+06	5.99744e+06	1	1971400	3	930	52	1
529700	45	517500	Kingsland	703	Eden-Albert Ward	7	Auckland City	02	Auckland Region	2.66618e+06	6.47981e+06	1	529700	10	1163	20	3
530300	174	517500	Kingsland	703	Eden-Albert Ward	7	Auckland City	02	Auckland Region	2.66577e+06	6.47975e+06	1	530300	6	995	61	2
530900	12	517500	Kingsland	703	Eden-Albert Ward	7	Auckland City	02	Auckland Region	2.66641e+06	6.47986e+06	1	530900	5	953	4	2
1578601	114	551502	Spotswood	3301	New Plymouth City Ward	33	New Plymouth District	07	Taranaki Region	2.59979e+06	6.23588e+06	1	1578601	8	1072	51	3
1578502	141	551502	Spotswood	3301	New Plymouth City Ward	33	New Plymouth District	07	Taranaki Region	2.60007e+06	6.23628e+06	1	1578502	6	986	49	2
923400	153	530400	Bader	1603	South Ward	16	Hamilton City	03	Waikato Region	2.71123e+06	6.3744e+06	1	923400	7	1018	54	2
923800	123	530400	Bader	1603	South Ward	16	Hamilton City	03	Waikato Region	2.7117e+06	6.37443e+06	1	923800	10	1142	55	3
2364400	132	584202	Richmond West	5105	Richmond Ward	51	Tasman District	16	Tasman Region	2.52517e+06	5.98506e+06	1	2364400	7	1000	46	2
2364500	102	584202	Richmond West	5105	Richmond Ward	51	Tasman District	16	Tasman Region	2.52494e+06	5.98517e+06	1	2364500	5	969	36	2
2365400	141	584201	Richmond East	5105	Richmond Ward	51	Tasman District	16	Tasman Region	2.52545e+06	5.98589e+06	1	2365400	7	1008	49	2
268700	183	511302	New Lynn South	604	New Lynn Ward	6	Waitakere City	02	Auckland Region	2.65971e+06	6.47578e+06	1	268700	8	1050	82	3
529500	114	517500	Kingsland	703	Eden-Albert Ward	7	Auckland City	02	Auckland Region	2.66641e+06	6.47995e+06	1	529500	6	978	40	2
2628200	120	595500	Beckenham	6006	Spreydon-Heathcote Ward	60	Christchurch City	13	Canterbury Region	2.48113e+06	5.73866e+06	1	2628200	3	921	40	1
2628300	225	595500	Beckenham	6006	Spreydon-Heathcote Ward	60	Christchurch City	13	Canterbury Region	2.48138e+06	5.73866e+06	1	2628300	3	920	74	1
924100	135	530400	Bader	1603	South Ward	16	Hamilton City	03	Waikato Region	2.71155e+06	6.37418e+06	1	924100	8	1061	61	3
529600	93	517500	Kingsland	703	Eden-Albert Ward	7	Auckland City	02	Auckland Region	2.66622e+06	6.47993e+06	1	529600	4	950	33	2
2103800	87	574700	Wilton-Otari	4702	Onslow-Western Ward	47	Wellington City	09	Wellington Region	2.65758e+06	5.99188e+06	1	2103800	5	963	30	2
2364900	105	584202	Richmond West	5105	Richmond Ward	51	Tasman District	16	Tasman Region	2.52481e+06	5.98512e+06	1	2364900	3	921	35	1
2888700	30	603920	Halfway Bush	7104	Hills Ward	71	Dunedin City	14	Otago Region	2.31305e+06	5.48071e+06	1	2888700	5	968	10	2
2889000	105	603920	Halfway Bush	7104	Hills Ward	71	Dunedin City	14	Otago Region	2.31332e+06	5.48071e+06	1	2889000	4	947	37	2
1971800	69	568602	Waterloo East	4605	Eastern Ward	46	Lower Hutt City	09	Wellington Region	2.67074e+06	5.99702e+06	1	1971800	4	946	24	2
1971500	141	568602	Waterloo East	4605	Eastern Ward	46	Lower Hutt City	09	Wellington Region	2.67127e+06	5.99726e+06	1	1971500	7	1003	49	2
1841201	174	562500	Roslyn	4001	Papaioea Ward	40	Palmerston North City	08	Manawatu-Wanganui Region	2.73374e+06	6.09377e+06	1	1841201	6	998	61	2
1840900	123	562500	Roslyn	4001	Papaioea Ward	40	Palmerston North City	08	Manawatu-Wanganui Region	2.73328e+06	6.0938e+06	1	1840900	10	1139	55	3
268900	141	511302	New Lynn South	604	New Lynn Ward	6	Waitakere City	02	Auckland Region	2.65964e+06	6.47556e+06	1	268900	9	1097	63	3
1840800	18	562500	Roslyn	4001	Papaioea Ward	40	Palmerston North City	08	Manawatu-Wanganui Region	2.73353e+06	6.09422e+06	1	1840800	10	1291	8	3
1578400	108	551502	Spotswood	3301	New Plymouth City Ward	33	New Plymouth District	07	Taranaki Region	2.59961e+06	6.23601e+06	1	1578400	8	1058	49	3
1578602	84	551502	Spotswood	3301	New Plymouth City Ward	33	New Plymouth District	07	Taranaki Region	2.60013e+06	6.23606e+06	1	1578602	8	1072	38	3
2103300	69	574700	Wilton-Otari	4702	Onslow-Western Ward	47	Wellington City	09	Wellington Region	2.65751e+06	5.99153e+06	1	2103300	5	963	24	2
2364800	51	584202	Richmond West	5105	Richmond Ward	51	Tasman District	16	Tasman Region	2.52492e+06	5.98499e+06	1	2364800	3	934	17	1
268800	135	511302	New Lynn South	604	New Lynn Ward	6	Waitakere City	02	Auckland Region	2.65985e+06	6.47578e+06	1	268800	6	997	47	2
1972200	51	568602	Waterloo East	4605	Eastern Ward	46	Lower Hutt City	09	Wellington Region	2.67103e+06	5.99697e+06	1	1972200	5	959	18	2
1971200	132	568601	Waterloo West	4604	Central Ward	46	Lower Hutt City	09	Wellington Region	2.6706e+06	5.99727e+06	1	1971200	1	877	44	1
1971300	126	568601	Waterloo West	4604	Central Ward	46	Lower Hutt City	09	Wellington Region	2.67071e+06	5.9972e+06	1	1971300	1	860	42	1
530100	114	517500	Kingsland	703	Eden-Albert Ward	7	Auckland City	02	Auckland Region	2.66576e+06	6.47983e+06	1	530100	3	927	38	1
5800	9	500208	Motutangi-Kareponia	101	Northern Ward	1	Far North District	01	Northland Region	2.54097e+06	6.68104e+06	1	5800	8	1052	4	3
1840100	117	562500	Roslyn	4001	Papaioea Ward	40	Palmerston North City	08	Manawatu-Wanganui Region	2.73331e+06	6.09362e+06	1	1840100	10	1169	53	3
1841500	141	562500	Roslyn	4001	Papaioea Ward	40	Palmerston North City	08	Manawatu-Wanganui Region	2.734e+06	6.09359e+06	1	1841500	5	956	49	2
1841300	114	562500	Roslyn	4001	Papaioea Ward	40	Palmerston North City	08	Manawatu-Wanganui Region	2.73377e+06	6.09357e+06	1	1841300	5	960	40	2
531000	51	517500	Kingsland	703	Eden-Albert Ward	7	Auckland City	02	Auckland Region	2.66646e+06	6.47976e+06	1	531000	8	1039	23	3
1578501	36	551502	Spotswood	3301	New Plymouth City Ward	33	New Plymouth District	07	Taranaki Region	2.59991e+06	6.23665e+06	1	1578501	6	986	13	2
530200	183	517500	Kingsland	703	Eden-Albert Ward	7	Auckland City	02	Auckland Region	2.66546e+06	6.47972e+06	1	530200	7	1009	64	2
2365900	126	584202	Richmond West	5105	Richmond Ward	51	Tasman District	16	Tasman Region	2.52544e+06	5.98482e+06	1	2365900	4	936	44	2
2365100	135	584202	Richmond West	5105	Richmond Ward	51	Tasman District	16	Tasman Region	2.52481e+06	5.98483e+06	1	2365100	4	950	47	2
2365707	144	584202	Richmond West	5105	Richmond Ward	51	Tasman District	16	Tasman Region	2.52462e+06	5.98481e+06	1	2365707	5	965	50	2
529400	6	517500	Kingsland	703	Eden-Albert Ward	7	Auckland City	02	Auckland Region	2.66665e+06	6.48005e+06	1	529400	6	978	2	2
268600	186	511302	New Lynn South	604	New Lynn Ward	6	Waitakere City	02	Auckland Region	2.65957e+06	6.4758e+06	1	268600	7	1021	65	2
1972300	87	568602	Waterloo East	4605	Eastern Ward	46	Lower Hutt City	09	Wellington Region	2.6709e+06	5.99686e+06	1	1972300	5	959	30	2
1971700	108	568602	Waterloo East	4605	Eastern Ward	46	Lower Hutt City	09	Wellington Region	2.67088e+06	5.99716e+06	1	1971700	5	961	38	2
1841800	162	562500	Roslyn	4001	Papaioea Ward	40	Palmerston North City	08	Manawatu-Wanganui Region	2.73371e+06	6.09334e+06	1	1841800	10	1150	73	3
1841402	135	562500	Roslyn	4001	Papaioea Ward	40	Palmerston North City	08	Manawatu-Wanganui Region	2.7339e+06	6.09342e+06	1	1841402	3	925	45	1
661100	291	522201	Papatoetoe North	802	Papatoetoe Ward	8	Manukau City	02	Auckland Region	2.6756e+06	6.46873e+06	1	661100	7	1015	102	2
398500	114	515100	Westmere	701	Western Bays Ward	7	Auckland City	02	Auckland Region	2.66449e+06	6.4811e+06	1	398500	5	956	40	2
2627000	72	594400	St Martins	6006	Spreydon-Heathcote Ward	60	Christchurch City	13	Canterbury Region	2.48211e+06	5.73812e+06	1	2627000	1	888	24	1
2626700	165	594400	St Martins	6006	Spreydon-Heathcote Ward	60	Christchurch City	13	Canterbury Region	2.48244e+06	5.73804e+06	1	2626700	6	976	58	2
923600	132	530400	Bader	1603	South Ward	16	Hamilton City	03	Waikato Region	2.71155e+06	6.37442e+06	1	923600	10	1160	59	3
267601	132	511301	New Lynn North	604	New Lynn Ward	6	Waitakere City	02	Auckland Region	2.65985e+06	6.476e+06	1	267601	8	1057	59	3
530400	132	517500	Kingsland	703	Eden-Albert Ward	7	Auckland City	02	Auckland Region	2.66549e+06	6.47962e+06	1	530400	7	1002	46	2
1972700	123	568602	Waterloo East	4605	Eastern Ward	46	Lower Hutt City	09	Wellington Region	2.67159e+06	5.99751e+06	1	1972700	5	955	43	2
1971100	153	568601	Waterloo West	4604	Central Ward	46	Lower Hutt City	09	Wellington Region	2.67058e+06	5.99749e+06	1	1971100	2	909	50	1
530000	168	517500	Kingsland	703	Eden-Albert Ward	7	Auckland City	02	Auckland Region	2.66547e+06	6.47981e+06	1	530000	3	926	55	1
1841100	96	562500	Roslyn	4001	Papaioea Ward	40	Palmerston North City	08	Manawatu-Wanganui Region	2.73359e+06	6.09391e+06	1	1841100	8	1032	43	3
1579200	123	551503	Marfell	3301	New Plymouth City Ward	33	New Plymouth District	07	Taranaki Region	2.60043e+06	6.23621e+06	1	1579200	9	1083	55	3
1579100	60	551502	Spotswood	3301	New Plymouth City Ward	33	New Plymouth District	07	Taranaki Region	2.60028e+06	6.23632e+06	1	1579100	7	1030	21	2
924000	126	530400	Bader	1603	South Ward	16	Hamilton City	03	Waikato Region	2.71132e+06	6.3743e+06	1	924000	8	1044	57	3
2103700	33	574700	Wilton-Otari	4703	Lambton Ward	47	Wellington City	09	Wellington Region	2.65787e+06	5.99232e+06	1	2103700	1	885	11	1
2365709	66	584202	Richmond West	5105	Richmond Ward	51	Tasman District	16	Tasman Region	2.52435e+06	5.98468e+06	1	2365709	6	983	23	2
2365600	69	584202	Richmond West	5105	Richmond Ward	51	Tasman District	16	Tasman Region	2.52458e+06	5.9851e+06	1	2365600	8	1046	31	3
1971900	81	568602	Waterloo East	4605	Eastern Ward	46	Lower Hutt City	09	Wellington Region	2.67088e+06	5.99701e+06	1	1971900	4	946	28	2
1972000	54	568602	Waterloo East	4605	Eastern Ward	46	Lower Hutt City	09	Wellington Region	2.67104e+06	5.9971e+06	1	1972000	3	922	18	1
1972100	93	568602	Waterloo East	4605	Eastern Ward	46	Lower Hutt City	09	Wellington Region	2.67118e+06	5.99707e+06	1	1972100	3	922	31	1
1972800	117	568602	Waterloo East	4605	Eastern Ward	46	Lower Hutt City	09	Wellington Region	2.67154e+06	5.99743e+06	1	1972800	7	1016	41	2
530700	87	517500	Kingsland	703	Eden-Albert Ward	7	Auckland City	02	Auckland Region	2.66571e+06	6.47956e+06	1	530700	6	981	30	2
530800	48	517500	Kingsland	703	Eden-Albert Ward	7	Auckland City	02	Auckland Region	2.66587e+06	6.47962e+06	1	530800	3	927	16	1
402700	108	515410	Grey Lynn West	701	Western Bays Ward	7	Auckland City	02	Auckland Region	2.6654e+06	6.48145e+06	1	402700	4	940	38	2
533800	60	517600	St Lukes	703	Eden-Albert Ward	7	Auckland City	02	Auckland Region	2.66438e+06	6.47934e+06	1	533800	3	923	20	1
533900	141	517600	St Lukes	703	Eden-Albert Ward	7	Auckland City	02	Auckland Region	2.66441e+06	6.47925e+06	1	533900	2	908	47	1
534700	138	517600	St Lukes	703	Eden-Albert Ward	7	Auckland City	02	Auckland Region	2.66507e+06	6.47916e+06	1	534700	7	1013	48	2
2893600	72	603710	Maori Hill	7104	Hills Ward	71	Dunedin City	14	Otago Region	2.31573e+06	5.48019e+06	1	2893600	1	888	24	1
1976102	48	568701	Waiwhetu North	4605	Eastern Ward	46	Lower Hutt City	09	Wellington Region	2.67092e+06	5.99642e+06	1	1976102	8	1057	22	3
1842400	123	562500	Roslyn	4001	Papaioea Ward	40	Palmerston North City	08	Manawatu-Wanganui Region	2.73373e+06	6.09283e+06	1	1842400	10	1273	55	3
1581000	84	551501	Lynmouth	3301	New Plymouth City Ward	33	New Plymouth District	07	Taranaki Region	2.6008e+06	6.23725e+06	1	1581000	5	969	29	2
1580900	72	551501	Lynmouth	3301	New Plymouth City Ward	33	New Plymouth District	07	Taranaki Region	2.6005e+06	6.23716e+06	1	1580900	5	969	25	2
924902	141	529300	Glenview	1603	South Ward	16	Hamilton City	03	Waikato Region	2.7121e+06	6.3729e+06	1	924902	5	955	49	2
925201	72	529300	Glenview	1603	South Ward	16	Hamilton City	03	Waikato Region	2.71144e+06	6.37289e+06	1	925201	6	985	25	2
926100	168	529300	Glenview	1603	South Ward	16	Hamilton City	03	Waikato Region	2.71145e+06	6.37348e+06	1	926100	9	1076	76	3
438304	129	514103	Auckland Central East	704	Hobson Ward	7	Auckland City	02	Auckland Region	2.66857e+06	6.48215e+06	1	438304	9	1080	58	3
2104302	51	574700	Wilton-Otari	4702	Onslow-Western Ward	47	Wellington City	09	Wellington Region	2.65777e+06	5.99184e+06	1	2104302	1	880	17	1
2105300	147	574700	Wilton-Otari	4702	Onslow-Western Ward	47	Wellington City	09	Wellington Region	2.65741e+06	5.99233e+06	1	2105300	1	885	49	1
531800	18	517500	Kingsland	703	Eden-Albert Ward	7	Auckland City	02	Auckland Region	2.66582e+06	6.47955e+06	1	531800	8	1045	8	3
2892200	81	603720	Balmacewen	7104	Hills Ward	71	Dunedin City	14	Otago Region	2.3155e+06	5.48046e+06	1	2892200	4	950	28	2
269500	63	511302	New Lynn South	604	New Lynn Ward	6	Waitakere City	02	Auckland Region	2.65939e+06	6.47554e+06	1	269500	9	1107	28	3
925301	66	529300	Glenview	1603	South Ward	16	Hamilton City	03	Waikato Region	2.71203e+06	6.37274e+06	1	925301	3	920	22	1
2104402	60	574700	Wilton-Otari	4702	Onslow-Western Ward	47	Wellington City	09	Wellington Region	2.65794e+06	5.99185e+06	1	2104402	4	939	21	2
2630000	90	595300	Hillmorton	6006	Spreydon-Heathcote Ward	60	Christchurch City	13	Canterbury Region	2.4766e+06	5.73874e+06	1	2630000	6	982	31	2
1449100	108	547400	Pirimai	3199	Area Outside Ward	31	Napier City	06	Hawke's Bay Region	2.84372e+06	6.18091e+06	1	1449100	8	1033	49	3
270500	147	511700	Kelston Central	604	New Lynn Ward	6	Waitakere City	02	Auckland Region	2.65891e+06	6.47739e+06	1	270500	7	1021	51	2
2104902	90	574700	Wilton-Otari	4702	Onslow-Western Ward	47	Wellington City	09	Wellington Region	2.65764e+06	5.99262e+06	1	2104902	4	938	31	2
2105002	117	574700	Wilton-Otari	4702	Onslow-Western Ward	47	Wellington City	09	Wellington Region	2.65777e+06	5.9927e+06	1	2105002	5	967	41	2
532200	93	517500	Kingsland	703	Eden-Albert Ward	7	Auckland City	02	Auckland Region	2.6655e+06	6.47929e+06	1	532200	4	946	33	2
2629200	3	590300	Middleton	6006	Spreydon-Heathcote Ward	60	Christchurch City	13	Canterbury Region	2.47672e+06	5.73955e+06	1	2629200	4	942	1	2
1712300	54	555700	Castlecliff North	3702	Urban Ward	37	Wanganui District	08	Manawatu-Wanganui Region	2.6791e+06	6.1396e+06	1	1712300	10	1205	24	3
1712200	111	555700	Castlecliff North	3702	Urban Ward	37	Wanganui District	08	Manawatu-Wanganui Region	2.67908e+06	6.13945e+06	1	1712200	9	1136	50	3
2892102	120	603710	Maori Hill	7104	Hills Ward	71	Dunedin City	14	Otago Region	2.31553e+06	5.48035e+06	1	2892102	3	928	40	1
532100	288	517500	Kingsland	703	Eden-Albert Ward	7	Auckland City	02	Auckland Region	2.66544e+06	6.47934e+06	1	532100	4	946	101	2
400300	117	515100	Westmere	701	Western Bays Ward	7	Auckland City	02	Auckland Region	2.66339e+06	6.4814e+06	1	400300	1	897	39	1
532700	114	517500	Kingsland	703	Eden-Albert Ward	7	Auckland City	02	Auckland Region	2.66522e+06	6.47909e+06	1	532700	3	929	38	1
1843600	144	562500	Roslyn	4001	Papaioea Ward	40	Palmerston North City	08	Manawatu-Wanganui Region	2.73372e+06	6.09253e+06	1	1843600	9	1084	65	3
438216	318	514101	Auckland Harbourside	704	Hobson Ward	7	Auckland City	02	Auckland Region	2.66871e+06	6.4821e+06	1	438216	7	1029	111	2
532000	93	517500	Kingsland	703	Eden-Albert Ward	7	Auckland City	02	Auckland Region	2.66542e+06	6.47943e+06	1	532000	8	1045	42	3
925500	156	529300	Glenview	1603	South Ward	16	Hamilton City	03	Waikato Region	2.71198e+06	6.37226e+06	1	925500	4	936	55	2
532600	141	517500	Kingsland	703	Eden-Albert Ward	7	Auckland City	02	Auckland Region	2.66546e+06	6.47918e+06	1	532600	3	929	47	1
2104401	78	574700	Wilton-Otari	4703	Lambton Ward	47	Wellington City	09	Wellington Region	2.65795e+06	5.992e+06	1	2104401	4	939	27	2
270300	162	511700	Kelston Central	604	New Lynn Ward	6	Waitakere City	02	Auckland Region	2.65898e+06	6.47765e+06	1	270300	9	1089	73	3
1711900	24	555700	Castlecliff North	3702	Urban Ward	37	Wanganui District	08	Manawatu-Wanganui Region	2.67881e+06	6.13942e+06	1	1711900	10	1141	11	3
1712400	84	555700	Castlecliff North	3702	Urban Ward	37	Wanganui District	08	Manawatu-Wanganui Region	2.67932e+06	6.1393e+06	1	1712400	10	1165	38	3
2497700	111	587830	Islington	6004	Riccarton-Wigram Ward	60	Christchurch City	13	Canterbury Region	2.4703e+06	5.74073e+06	1	2497700	6	985	39	2
1711500	207	555700	Castlecliff North	3702	Urban Ward	37	Wanganui District	08	Manawatu-Wanganui Region	2.67865e+06	6.13992e+06	1	1711500	9	1129	93	3
1711600	75	555700	Castlecliff North	3702	Urban Ward	37	Wanganui District	08	Manawatu-Wanganui Region	2.67844e+06	6.13997e+06	1	1711600	10	1141	34	3
2891202	36	603500	Woodhaugh	7103	Cargill Ward	71	Dunedin City	14	Otago Region	2.31674e+06	5.48066e+06	1	2891202	6	993	13	2
2890900	51	603500	Woodhaugh	7104	Hills Ward	71	Dunedin City	14	Otago Region	2.3163e+06	5.48131e+06	1	2890900	3	927	17	1
1711400	6	557400	Upper Aramoho	3702	Urban Ward	37	Wanganui District	08	Manawatu-Wanganui Region	2.68866e+06	6.14356e+06	1	1711400	4	948	2	2
1842901	72	562500	Roslyn	4001	Papaioea Ward	40	Palmerston North City	08	Manawatu-Wanganui Region	2.73327e+06	6.09251e+06	1	1842901	9	1103	32	3
1842100	72	562500	Roslyn	4001	Papaioea Ward	40	Palmerston North City	08	Manawatu-Wanganui Region	2.73358e+06	6.093e+06	1	1842100	10	1186	32	3
532800	99	517500	Kingsland	703	Eden-Albert Ward	7	Auckland City	02	Auckland Region	2.66548e+06	6.47908e+06	1	532800	4	950	35	2
925304	51	529300	Glenview	1603	South Ward	16	Hamilton City	03	Waikato Region	2.71184e+06	6.37218e+06	1	925304	2	917	17	1
925800	132	529300	Glenview	1603	South Ward	16	Hamilton City	03	Waikato Region	2.71163e+06	6.37367e+06	1	925800	7	1002	46	2
924800	189	529300	Glenview	1603	South Ward	16	Hamilton City	03	Waikato Region	2.71192e+06	6.37306e+06	1	924800	7	1007	66	2
924901	33	529300	Glenview	1603	South Ward	16	Hamilton City	03	Waikato Region	2.71203e+06	6.37309e+06	1	924901	5	955	12	2
2498601	102	587830	Islington	6004	Riccarton-Wigram Ward	60	Christchurch City	13	Canterbury Region	2.47091e+06	5.73989e+06	1	2498601	6	983	36	2
1712000	39	555700	Castlecliff North	3702	Urban Ward	37	Wanganui District	08	Manawatu-Wanganui Region	2.67895e+06	6.13924e+06	1	1712000	10	1165	18	3
438104	33	514103	Auckland Central East	704	Hobson Ward	7	Auckland City	02	Auckland Region	2.66812e+06	6.48248e+06	1	438104	8	1060	15	3
1843000	141	562500	Roslyn	4001	Papaioea Ward	40	Palmerston North City	08	Manawatu-Wanganui Region	2.73343e+06	6.09225e+06	1	1843000	5	972	49	2
532900	114	517500	Kingsland	703	Eden-Albert Ward	7	Auckland City	02	Auckland Region	2.66545e+06	6.47898e+06	1	532900	4	950	40	2
1842200	72	562500	Roslyn	4001	Papaioea Ward	40	Palmerston North City	08	Manawatu-Wanganui Region	2.73369e+06	6.09295e+06	1	1842200	10	1186	32	3
662400	6	522201	Papatoetoe North	802	Papatoetoe Ward	8	Manukau City	02	Auckland Region	2.67595e+06	6.46858e+06	1	662400	9	1079	3	3
1581100	42	551501	Lynmouth	3301	New Plymouth City Ward	33	New Plymouth District	07	Taranaki Region	2.60087e+06	6.23736e+06	1	1581100	5	973	15	2
925100	126	529300	Glenview	1603	South Ward	16	Hamilton City	03	Waikato Region	2.71167e+06	6.37291e+06	1	925100	3	920	42	1
2629300	165	595300	Hillmorton	6006	Spreydon-Heathcote Ward	60	Christchurch City	13	Canterbury Region	2.47685e+06	5.73901e+06	1	2629300	5	957	58	2
1448900	105	547400	Pirimai	3199	Area Outside Ward	31	Napier City	06	Hawke's Bay Region	2.8438e+06	6.18101e+06	1	1448900	5	959	37	2
531900	87	517500	Kingsland	703	Eden-Albert Ward	7	Auckland City	02	Auckland Region	2.66565e+06	6.47949e+06	1	531900	8	1045	39	3
2105200	228	574700	Wilton-Otari	4702	Onslow-Western Ward	47	Wellington City	09	Wellington Region	2.65754e+06	5.99269e+06	1	2105200	3	931	75	1
2498501	93	587830	Islington	6004	Riccarton-Wigram Ward	60	Christchurch City	13	Canterbury Region	2.47074e+06	5.74004e+06	1	2498501	6	996	33	2
2498602	69	587500	Hornby South	6004	Riccarton-Wigram Ward	60	Christchurch City	13	Canterbury Region	2.47104e+06	5.73993e+06	1	2498602	6	983	24	2
531300	6	517500	Kingsland	703	Eden-Albert Ward	7	Auckland City	02	Auckland Region	2.66604e+06	6.47961e+06	1	531300	5	953	2	2
2891400	63	603500	Woodhaugh	7104	Hills Ward	71	Dunedin City	14	Otago Region	2.31623e+06	5.4806e+06	1	2891400	3	924	21	1
438212	222	514101	Auckland Harbourside	704	Hobson Ward	7	Auckland City	02	Auckland Region	2.66835e+06	6.48252e+06	1	438212	7	1030	78	2
7101	3	500100	Awanui	101	Northern Ward	1	Far North District	01	Northland Region	2.53423e+06	6.68415e+06	1	7101	9	1098	1	3
1842700	117	562500	Roslyn	4001	Papaioea Ward	40	Palmerston North City	08	Manawatu-Wanganui Region	2.73331e+06	6.0921e+06	1	1842700	9	1093	53	3
7102	12	500100	Awanui	101	Northern Ward	1	Far North District	01	Northland Region	2.53419e+06	6.68387e+06	1	7102	9	1098	5	3
7300	117	500100	Awanui	101	Northern Ward	1	Far North District	01	Northland Region	2.53416e+06	6.68352e+06	1	7300	8	1067	53	3
8200	90	500204	Herekino	101	Northern Ward	1	Far North District	01	Northland Region	2.53393e+06	6.68003e+06	1	8200	9	1092	40	3
925202	75	529300	Glenview	1603	South Ward	16	Hamilton City	03	Waikato Region	2.71178e+06	6.37277e+06	1	925202	6	985	26	2
1448700	102	547400	Pirimai	3199	Area Outside Ward	31	Napier City	06	Hawke's Bay Region	2.84338e+06	6.18074e+06	1	1448700	6	991	36	2
2498905	78	587830	Islington	6004	Riccarton-Wigram Ward	60	Christchurch City	13	Canterbury Region	2.47104e+06	5.7398e+06	1	2498905	6	978	27	2
270600	111	511700	Kelston Central	604	New Lynn Ward	6	Waitakere City	02	Auckland Region	2.65908e+06	6.47754e+06	1	270600	8	1048	50	3
2498300	72	587830	Islington	6004	Riccarton-Wigram Ward	60	Christchurch City	13	Canterbury Region	2.4704e+06	5.74017e+06	1	2498300	3	927	24	1
2498100	189	587830	Islington	6004	Riccarton-Wigram Ward	60	Christchurch City	13	Canterbury Region	2.47033e+06	5.74042e+06	1	2498100	6	975	66	2
1711700	78	555700	Castlecliff North	3702	Urban Ward	37	Wanganui District	08	Manawatu-Wanganui Region	2.67878e+06	6.13963e+06	1	1711700	10	1205	35	3
2891100	69	603500	Woodhaugh	7104	Hills Ward	71	Dunedin City	14	Otago Region	2.31613e+06	5.48088e+06	1	2891100	3	924	23	1
2891000	180	603500	Woodhaugh	7104	Hills Ward	71	Dunedin City	14	Otago Region	2.31617e+06	5.48101e+06	1	2891000	7	1019	63	2
1842500	120	562500	Roslyn	4001	Papaioea Ward	40	Palmerston North City	08	Manawatu-Wanganui Region	2.73302e+06	6.09261e+06	1	1842500	9	1134	54	3
1841900	171	562500	Roslyn	4001	Papaioea Ward	40	Palmerston North City	08	Manawatu-Wanganui Region	2.73401e+06	6.0933e+06	1	1841900	5	966	60	2
400400	57	515100	Westmere	701	Western Bays Ward	7	Auckland City	02	Auckland Region	2.66327e+06	6.48137e+06	1	400400	6	982	20	2
532300	108	517500	Kingsland	703	Eden-Albert Ward	7	Auckland City	02	Auckland Region	2.66603e+06	6.47934e+06	1	532300	6	997	38	2
1581200	48	551501	Lynmouth	3301	New Plymouth City Ward	33	New Plymouth District	07	Taranaki Region	2.60109e+06	6.23735e+06	1	1581200	5	973	17	2
925400	207	529300	Glenview	1603	South Ward	16	Hamilton City	03	Waikato Region	2.71219e+06	6.37245e+06	1	925400	4	945	72	2
925203	81	529300	Glenview	1603	South Ward	16	Hamilton City	03	Waikato Region	2.71179e+06	6.37268e+06	1	925203	6	985	28	2
925303	213	529300	Glenview	1603	South Ward	16	Hamilton City	03	Waikato Region	2.7119e+06	6.37255e+06	1	925303	2	917	70	1
2104200	132	574700	Wilton-Otari	4702	Onslow-Western Ward	47	Wellington City	09	Wellington Region	2.65758e+06	5.99168e+06	1	2104200	1	890	44	1
2105100	102	574700	Wilton-Otari	4702	Onslow-Western Ward	47	Wellington City	09	Wellington Region	2.6578e+06	5.99257e+06	1	2105100	4	941	36	2
1712100	126	555700	Castlecliff North	3702	Urban Ward	37	Wanganui District	08	Manawatu-Wanganui Region	2.67897e+06	6.1394e+06	1	1712100	9	1075	57	3
531200	156	517500	Kingsland	703	Eden-Albert Ward	7	Auckland City	02	Auckland Region	2.66622e+06	6.4796e+06	1	531200	8	1039	70	3
531400	165	517500	Kingsland	703	Eden-Albert Ward	7	Auckland City	02	Auckland Region	2.666e+06	6.47945e+06	1	531400	5	953	58	2
1843500	165	562500	Roslyn	4001	Papaioea Ward	40	Palmerston North City	08	Manawatu-Wanganui Region	2.73359e+06	6.09243e+06	1	1843500	6	982	58	2
1842000	63	562500	Roslyn	4001	Papaioea Ward	40	Palmerston North City	08	Manawatu-Wanganui Region	2.73378e+06	6.09312e+06	1	1842000	10	1169	28	3
1842300	93	562500	Roslyn	4001	Papaioea Ward	40	Palmerston North City	08	Manawatu-Wanganui Region	2.73388e+06	6.09299e+06	1	1842300	10	1273	42	3
662300	240	522201	Papatoetoe North	802	Papatoetoe Ward	8	Manukau City	02	Auckland Region	2.67578e+06	6.46866e+06	1	662300	8	1056	108	3
1581300	93	551501	Lynmouth	3301	New Plymouth City Ward	33	New Plymouth District	07	Taranaki Region	2.60149e+06	6.2375e+06	1	1581300	6	988	33	2
984408	186	527915	Lake Cameron	1701	Pirongia Ward	17	Waipa District	03	Waikato Region	2.71227e+06	6.37096e+06	1	984408	3	935	61	1
270400	129	511700	Kelston Central	604	New Lynn Ward	6	Waitakere City	02	Auckland Region	2.65882e+06	6.47748e+06	1	270400	7	1015	45	2
1449200	108	547400	Pirimai	3199	Area Outside Ward	31	Napier City	06	Hawke's Bay Region	2.84353e+06	6.18078e+06	1	1449200	9	1094	49	3
2498502	75	587830	Islington	6004	Riccarton-Wigram Ward	60	Christchurch City	13	Canterbury Region	2.47082e+06	5.73997e+06	1	2498502	6	996	26	2
2104800	78	574700	Wilton-Otari	4702	Onslow-Western Ward	47	Wellington City	09	Wellington Region	2.65775e+06	5.99317e+06	1	2104800	1	885	26	1
2497800	75	587830	Islington	6004	Riccarton-Wigram Ward	60	Christchurch City	13	Canterbury Region	2.47044e+06	5.74071e+06	1	2497800	7	1022	26	2
2891201	15	603500	Woodhaugh	7104	Hills Ward	71	Dunedin City	14	Otago Region	2.31636e+06	5.48086e+06	1	2891201	6	993	5	2
8403	9	500302	Kaitaia East	101	Northern Ward	1	Far North District	01	Northland Region	2.5344e+06	6.67873e+06	1	8403	9	1111	4	3
8404	48	500302	Kaitaia East	101	Northern Ward	1	Far North District	01	Northland Region	2.53534e+06	6.67828e+06	1	8404	9	1111	22	3
8501	42	500204	Herekino	101	Northern Ward	1	Far North District	01	Northland Region	2.53688e+06	6.67691e+06	1	8501	5	960	15	2
269600	291	511302	New Lynn South	604	New Lynn Ward	6	Waitakere City	02	Auckland Region	2.65939e+06	6.47544e+06	1	269600	6	999	102	2
1843100	87	562500	Roslyn	4001	Papaioea Ward	40	Palmerston North City	08	Manawatu-Wanganui Region	2.73355e+06	6.09231e+06	1	1843100	5	972	30	2
1842902	21	562500	Roslyn	4001	Papaioea Ward	40	Palmerston North City	08	Manawatu-Wanganui Region	2.73333e+06	6.09239e+06	1	1842902	9	1103	9	3
1842600	63	562500	Roslyn	4001	Papaioea Ward	40	Palmerston North City	08	Manawatu-Wanganui Region	2.73312e+06	6.09241e+06	1	1842600	9	1093	28	3
1581400	81	551501	Lynmouth	3301	New Plymouth City Ward	33	New Plymouth District	07	Taranaki Region	2.60148e+06	6.23737e+06	1	1581400	6	988	28	2
270700	132	511700	Kelston Central	604	New Lynn Ward	6	Waitakere City	02	Auckland Region	2.65899e+06	6.47732e+06	1	270700	8	1055	59	3
926000	108	529300	Glenview	1603	South Ward	16	Hamilton City	03	Waikato Region	2.7113e+06	6.37351e+06	1	926000	9	1096	49	3
1448800	123	547400	Pirimai	3199	Area Outside Ward	31	Napier City	06	Hawke's Bay Region	2.84361e+06	6.18112e+06	1	1448800	6	991	43	2
198401	102	508320	Glenfield North	503	Harbour Ward	5	North Shore City	02	Auckland Region	2.66504e+06	6.49017e+06	1	198401	10	1189	46	3
1714400	27	555800	Castlecliff South	3702	Urban Ward	37	Wanganui District	08	Manawatu-Wanganui Region	2.68049e+06	6.1385e+06	1	1714400	10	1197	12	3
1716000	135	555900	Mosston	3702	Urban Ward	37	Wanganui District	08	Manawatu-Wanganui Region	2.68099e+06	6.13858e+06	1	1716000	9	1098	61	3
2894300	54	603710	Maori Hill	7104	Hills Ward	71	Dunedin City	14	Otago Region	2.31559e+06	5.48014e+06	1	2894300	1	889	18	1
1978002	48	568702	Waiwhetu South	4602	Harbour Ward	46	Lower Hutt City	09	Wellington Region	2.67066e+06	5.9961e+06	1	1978002	4	947	17	2
1976700	84	568701	Waiwhetu North	4605	Eastern Ward	46	Lower Hutt City	09	Wellington Region	2.67071e+06	5.99671e+06	1	1976700	5	962	29	2
2370601	9	584301	Motueka West	5104	Motueka Ward	51	Tasman District	16	Tasman Region	2.51097e+06	6.01227e+06	1	2370601	8	1039	4	3
665500	336	522202	Papatoetoe Central	802	Papatoetoe Ward	8	Manukau City	02	Auckland Region	2.67661e+06	6.46739e+06	1	665500	8	1066	151	3
1846900	69	562600	Terrace End	4005	Hokowhitu Ward	40	Palmerston North City	08	Manawatu-Wanganui Region	2.73344e+06	6.09181e+06	1	1846900	5	962	24	2
1844800	207	562500	Roslyn	4001	Papaioea Ward	40	Palmerston North City	08	Manawatu-Wanganui Region	2.73404e+06	6.09267e+06	1	1844800	5	973	72	2
1581700	93	551501	Lynmouth	3301	New Plymouth City Ward	33	New Plymouth District	07	Taranaki Region	2.60117e+06	6.23724e+06	1	1581700	5	958	33	2
534100	33	517600	St Lukes	703	Eden-Albert Ward	7	Auckland City	02	Auckland Region	2.66408e+06	6.47914e+06	1	534100	5	971	12	2
2631200	201	595300	Hillmorton	6006	Spreydon-Heathcote Ward	60	Christchurch City	13	Canterbury Region	2.47687e+06	5.73822e+06	1	2631200	10	1163	90	3
926300	141	529300	Glenview	1603	South Ward	16	Hamilton City	03	Waikato Region	2.71174e+06	6.37335e+06	1	926300	8	1034	63	3
533300	168	517600	St Lukes	703	Eden-Albert Ward	7	Auckland City	02	Auckland Region	2.66477e+06	6.4796e+06	1	533300	4	936	59	2
1451300	78	547001	Tamatea North	3199	Area Outside Ward	31	Napier City	06	Hawke's Bay Region	2.84304e+06	6.18102e+06	1	1451300	9	1075	35	3
1451200	162	547001	Tamatea North	3199	Area Outside Ward	31	Napier City	06	Hawke's Bay Region	2.84292e+06	6.18098e+06	1	1451200	6	977	57	2
2894000	36	603710	Maori Hill	7104	Hills Ward	71	Dunedin City	14	Otago Region	2.31552e+06	5.48004e+06	1	2894000	1	889	12	1
2893900	51	603710	Maori Hill	7104	Hills Ward	71	Dunedin City	14	Otago Region	2.31583e+06	5.47997e+06	1	2893900	1	888	17	1
1975800	93	568701	Waiwhetu North	4605	Eastern Ward	46	Lower Hutt City	09	Wellington Region	2.67084e+06	5.99662e+06	1	1975800	7	1009	33	2
534601	180	517600	St Lukes	703	Eden-Albert Ward	7	Auckland City	02	Auckland Region	2.66493e+06	6.47939e+06	1	534601	5	954	63	2
1976500	147	568701	Waiwhetu North	4605	Eastern Ward	46	Lower Hutt City	09	Wellington Region	2.67054e+06	5.99684e+06	1	1976500	2	909	49	1
1582400	135	551501	Lynmouth	3301	New Plymouth City Ward	33	New Plymouth District	07	Taranaki Region	2.60086e+06	6.23709e+06	1	1582400	9	1133	61	3
926400	156	529300	Glenview	1603	South Ward	16	Hamilton City	03	Waikato Region	2.71185e+06	6.37326e+06	1	926400	4	953	55	2
2631300	174	595300	Hillmorton	6006	Spreydon-Heathcote Ward	60	Christchurch City	13	Canterbury Region	2.47687e+06	5.7388e+06	1	2631300	8	1039	78	3
534002	78	517600	St Lukes	703	Eden-Albert Ward	7	Auckland City	02	Auckland Region	2.6644e+06	6.47918e+06	1	534002	5	965	27	2
1713200	120	555700	Castlecliff North	3702	Urban Ward	37	Wanganui District	08	Manawatu-Wanganui Region	2.67966e+06	6.1389e+06	1	1713200	9	1090	54	3
1712700	117	555700	Castlecliff North	3702	Urban Ward	37	Wanganui District	08	Manawatu-Wanganui Region	2.67932e+06	6.13899e+06	1	1712700	10	1157	53	3
665400	261	522202	Papatoetoe Central	802	Papatoetoe Ward	8	Manukau City	02	Auckland Region	2.67674e+06	6.46763e+06	1	665400	8	1040	117	3
1845001	87	562500	Roslyn	4001	Papaioea Ward	40	Palmerston North City	08	Manawatu-Wanganui Region	2.73426e+06	6.09264e+06	1	1845001	8	1060	39	3
1844201	105	562500	Roslyn	4001	Papaioea Ward	40	Palmerston North City	08	Manawatu-Wanganui Region	2.73406e+06	6.09317e+06	1	1844201	9	1098	47	3
533400	153	517600	St Lukes	703	Eden-Albert Ward	7	Auckland City	02	Auckland Region	2.66494e+06	6.47959e+06	1	533400	5	974	54	2
533601	180	517600	St Lukes	703	Eden-Albert Ward	7	Auckland City	02	Auckland Region	2.66519e+06	6.4797e+06	1	533601	8	1058	81	3
402800	201	515431	Surrey Crescent	701	Western Bays Ward	7	Auckland City	02	Auckland Region	2.66444e+06	6.48097e+06	1	402800	5	973	70	2
2631700	198	595300	Hillmorton	6006	Spreydon-Heathcote Ward	60	Christchurch City	13	Canterbury Region	2.47712e+06	5.73898e+06	1	2631700	6	987	69	2
1712600	66	555700	Castlecliff North	3702	Urban Ward	37	Wanganui District	08	Manawatu-Wanganui Region	2.67917e+06	6.13888e+06	1	1712600	9	1130	30	3
1713100	69	555700	Castlecliff North	3702	Urban Ward	37	Wanganui District	08	Manawatu-Wanganui Region	2.67951e+06	6.13882e+06	1	1713100	9	1093	31	3
1714100	48	555800	Castlecliff South	3702	Urban Ward	37	Wanganui District	08	Manawatu-Wanganui Region	2.67963e+06	6.13825e+06	1	1714100	9	1111	22	3
2893400	138	603710	Maori Hill	7104	Hills Ward	71	Dunedin City	14	Otago Region	2.31591e+06	5.48026e+06	1	2893400	2	912	46	1
2893300	75	603710	Maori Hill	7104	Hills Ward	71	Dunedin City	14	Otago Region	2.31616e+06	5.48032e+06	1	2893300	3	934	25	1
1975900	84	568701	Waiwhetu North	4605	Eastern Ward	46	Lower Hutt City	09	Wellington Region	2.67075e+06	5.99649e+06	1	1975900	7	1009	29	2
613200	144	520202	Ellerslie South	706	Tamaki-Maungakiekie Ward	7	Auckland City	02	Auckland Region	2.67094e+06	6.47704e+06	1	613200	3	929	48	1
403300	162	515431	Surrey Crescent	701	Western Bays Ward	7	Auckland City	02	Auckland Region	2.66453e+06	6.48068e+06	1	403300	4	939	57	2
1844000	78	562500	Roslyn	4001	Papaioea Ward	40	Palmerston North City	08	Manawatu-Wanganui Region	2.73396e+06	6.09245e+06	1	1844000	10	1161	35	3
1844300	39	562500	Roslyn	4001	Papaioea Ward	40	Palmerston North City	08	Manawatu-Wanganui Region	2.73401e+06	6.09302e+06	1	1844300	9	1098	18	3
1582700	162	551502	Spotswood	3301	New Plymouth City Ward	33	New Plymouth District	07	Taranaki Region	2.60005e+06	6.23663e+06	1	1582700	5	971	57	2
1582800	126	551502	Spotswood	3301	New Plymouth City Ward	33	New Plymouth District	07	Taranaki Region	2.6002e+06	6.23678e+06	1	1582800	7	1027	44	2
1582900	117	551501	Lynmouth	3301	New Plymouth City Ward	33	New Plymouth District	07	Taranaki Region	2.60029e+06	6.23683e+06	1	1582900	9	1092	53	3
2630600	228	595300	Hillmorton	6006	Spreydon-Heathcote Ward	60	Christchurch City	13	Canterbury Region	2.47662e+06	5.73823e+06	1	2630600	7	1027	80	2
2631400	159	595300	Hillmorton	6006	Spreydon-Heathcote Ward	60	Christchurch City	13	Canterbury Region	2.47684e+06	5.73857e+06	1	2631400	10	1180	72	3
533501	294	517600	St Lukes	703	Eden-Albert Ward	7	Auckland City	02	Auckland Region	2.66513e+06	6.47962e+06	1	533501	8	1039	132	3
1451100	141	547001	Tamatea North	3199	Area Outside Ward	31	Napier City	06	Hawke's Bay Region	2.84306e+06	6.18123e+06	1	1451100	6	990	49	2
1713800	132	555800	Castlecliff South	3702	Urban Ward	37	Wanganui District	08	Manawatu-Wanganui Region	2.67982e+06	6.13866e+06	1	1713800	8	1068	59	3
1712900	102	555700	Castlecliff North	3702	Urban Ward	37	Wanganui District	08	Manawatu-Wanganui Region	2.67932e+06	6.13869e+06	1	1712900	10	1255	46	3
1714300	84	555800	Castlecliff South	3702	Urban Ward	37	Wanganui District	08	Manawatu-Wanganui Region	2.68019e+06	6.13853e+06	1	1714300	9	1111	38	3
533000	243	517600	St Lukes	703	Eden-Albert Ward	7	Auckland City	02	Auckland Region	2.66486e+06	6.47986e+06	1	533000	4	951	85	2
2892700	114	603710	Maori Hill	7104	Hills Ward	71	Dunedin City	14	Otago Region	2.3159e+06	5.48064e+06	1	2892700	3	918	38	1
665602	126	522202	Papatoetoe Central	802	Papatoetoe Ward	8	Manukau City	02	Auckland Region	2.67688e+06	6.46744e+06	1	665602	9	1095	57	3
1844900	111	562500	Roslyn	4001	Papaioea Ward	40	Palmerston North City	08	Manawatu-Wanganui Region	2.73427e+06	6.09279e+06	1	1844900	8	1060	50	3
1844700	108	562500	Roslyn	4001	Papaioea Ward	40	Palmerston North City	08	Manawatu-Wanganui Region	2.73424e+06	6.09291e+06	1	1844700	9	1095	49	3
1844600	51	562500	Roslyn	4001	Papaioea Ward	40	Palmerston North City	08	Manawatu-Wanganui Region	2.73411e+06	6.09284e+06	1	1844600	9	1095	23	3
1190702	162	536513	Bethlehem East	2302	Otumoetai-Bethlehem Ward	23	Tauranga City	04	Bay of Plenty Region	2.78481e+06	6.38464e+06	1	1190702	3	921	53	1
1581600	90	551501	Lynmouth	3301	New Plymouth City Ward	33	New Plymouth District	07	Taranaki Region	2.60136e+06	6.23714e+06	1	1581600	5	958	31	2
2631100	60	595300	Hillmorton	6006	Spreydon-Heathcote Ward	60	Christchurch City	13	Canterbury Region	2.4769e+06	5.73832e+06	1	2631100	10	1193	27	3
533502	78	517600	St Lukes	703	Eden-Albert Ward	7	Auckland City	02	Auckland Region	2.66527e+06	6.47993e+06	1	533502	5	959	27	2
2630400	204	595300	Hillmorton	6006	Spreydon-Heathcote Ward	60	Christchurch City	13	Canterbury Region	2.47647e+06	5.7385e+06	1	2630400	6	996	71	2
534200	54	517600	St Lukes	703	Eden-Albert Ward	7	Auckland City	02	Auckland Region	2.66422e+06	6.47906e+06	1	534200	5	971	19	2
1450700	135	547001	Tamatea North	3199	Area Outside Ward	31	Napier City	06	Hawke's Bay Region	2.84294e+06	6.18176e+06	1	1450700	7	1025	47	2
1450800	141	547001	Tamatea North	3199	Area Outside Ward	31	Napier City	06	Hawke's Bay Region	2.84307e+06	6.18168e+06	1	1450800	9	1099	63	3
1713700	96	555800	Castlecliff South	3702	Urban Ward	37	Wanganui District	08	Manawatu-Wanganui Region	2.67964e+06	6.13853e+06	1	1713700	9	1086	43	3
1712800	72	555700	Castlecliff North	3702	Urban Ward	37	Wanganui District	08	Manawatu-Wanganui Region	2.67956e+06	6.13911e+06	1	1712800	9	1093	32	3
2893700	138	603710	Maori Hill	7104	Hills Ward	71	Dunedin City	14	Otago Region	2.31594e+06	5.48001e+06	1	2893700	1	898	46	1
2893100	99	603710	Maori Hill	7104	Hills Ward	71	Dunedin City	14	Otago Region	2.31604e+06	5.48056e+06	1	2893100	5	956	35	2
2892600	42	603710	Maori Hill	7104	Hills Ward	71	Dunedin City	14	Otago Region	2.31564e+06	5.48057e+06	1	2892600	3	923	14	1
2892800	69	603710	Maori Hill	7104	Hills Ward	71	Dunedin City	14	Otago Region	2.31575e+06	5.48056e+06	1	2892800	2	902	23	1
1976000	138	568701	Waiwhetu North	4605	Eastern Ward	46	Lower Hutt City	09	Wellington Region	2.6707e+06	5.99636e+06	1	1976000	8	1048	62	3
402900	99	515431	Surrey Crescent	701	Western Bays Ward	7	Auckland City	02	Auckland Region	2.6645e+06	6.4809e+06	1	402900	4	936	35	2
665601	45	522202	Papatoetoe Central	802	Papatoetoe Ward	8	Manukau City	02	Auckland Region	2.67674e+06	6.46744e+06	1	665601	9	1095	20	3
665300	300	522202	Papatoetoe Central	802	Papatoetoe Ward	8	Manukau City	02	Auckland Region	2.67646e+06	6.4676e+06	1	665300	8	1052	135	3
534500	186	517600	St Lukes	703	Eden-Albert Ward	7	Auckland City	02	Auckland Region	2.66479e+06	6.47928e+06	1	534500	6	975	65	2
1582100	108	551501	Lynmouth	3301	New Plymouth City Ward	33	New Plymouth District	07	Taranaki Region	2.60108e+06	6.23694e+06	1	1582100	3	921	36	1
1582500	69	551501	Lynmouth	3301	New Plymouth City Ward	33	New Plymouth District	07	Taranaki Region	2.6003e+06	6.23707e+06	1	1582500	8	1072	31	3
2630700	141	595300	Hillmorton	6006	Spreydon-Heathcote Ward	60	Christchurch City	13	Canterbury Region	2.47646e+06	5.73814e+06	1	2630700	9	1097	63	3
2631600	102	595300	Hillmorton	6006	Spreydon-Heathcote Ward	60	Christchurch City	13	Canterbury Region	2.47717e+06	5.73846e+06	1	2631600	4	942	36	2
403000	114	515431	Surrey Crescent	701	Western Bays Ward	7	Auckland City	02	Auckland Region	2.66464e+06	6.48095e+06	1	403000	2	911	38	1
403200	156	515431	Surrey Crescent	701	Western Bays Ward	7	Auckland City	02	Auckland Region	2.66461e+06	6.48074e+06	1	403200	2	914	51	1
271000	96	511700	Kelston Central	604	New Lynn Ward	6	Waitakere City	02	Auckland Region	2.6586e+06	6.47728e+06	1	271000	8	1056	43	3
1713600	3	555800	Castlecliff South	3702	Urban Ward	37	Wanganui District	08	Manawatu-Wanganui Region	2.67946e+06	6.13842e+06	1	1713600	9	1086	1	3
1714200	108	555800	Castlecliff South	3702	Urban Ward	37	Wanganui District	08	Manawatu-Wanganui Region	2.67982e+06	6.13839e+06	1	1714200	10	1288	49	3
1713300	132	555700	Castlecliff North	3702	Urban Ward	37	Wanganui District	08	Manawatu-Wanganui Region	2.67981e+06	6.13899e+06	1	1713300	9	1135	59	3
2893000	30	603710	Maori Hill	7104	Hills Ward	71	Dunedin City	14	Otago Region	2.31587e+06	5.48043e+06	1	2893000	5	956	10	2
2893200	162	603710	Maori Hill	7104	Hills Ward	71	Dunedin City	14	Otago Region	2.31608e+06	5.48042e+06	1	2893200	4	947	57	2
2892900	63	603710	Maori Hill	7104	Hills Ward	71	Dunedin City	14	Otago Region	2.31575e+06	5.48037e+06	1	2892900	2	902	21	1
534300	105	517600	St Lukes	703	Eden-Albert Ward	7	Auckland City	02	Auckland Region	2.66429e+06	6.47895e+06	1	534300	5	971	37	2
534001	66	517600	St Lukes	703	Eden-Albert Ward	7	Auckland City	02	Auckland Region	2.66419e+06	6.47919e+06	1	534001	5	965	23	2
534602	9	517600	St Lukes	703	Eden-Albert Ward	7	Auckland City	02	Auckland Region	2.66505e+06	6.47932e+06	1	534602	2	908	3	1
2369200	33	581850	Riwaka	5104	Motueka Ward	51	Tasman District	16	Tasman Region	2.5104e+06	6.01406e+06	1	2369200	5	972	12	2
2369500	66	581850	Riwaka	5104	Motueka Ward	51	Tasman District	16	Tasman Region	2.51041e+06	6.01344e+06	1	2369500	5	972	23	2
2369100	108	581850	Riwaka	5104	Motueka Ward	51	Tasman District	16	Tasman Region	2.5098e+06	6.01391e+06	1	2369100	5	967	38	2
2368500	84	581850	Riwaka	5104	Motueka Ward	51	Tasman District	16	Tasman Region	2.50971e+06	6.01411e+06	1	2368500	4	937	29	2
665101	150	522202	Papatoetoe Central	802	Papatoetoe Ward	8	Manukau City	02	Auckland Region	2.67638e+06	6.46795e+06	1	665101	8	1070	68	3
1843901	78	562500	Roslyn	4001	Papaioea Ward	40	Palmerston North City	08	Manawatu-Wanganui Region	2.73384e+06	6.09264e+06	1	1843901	8	1068	35	3
1843902	33	562500	Roslyn	4001	Papaioea Ward	40	Palmerston North City	08	Manawatu-Wanganui Region	2.73392e+06	6.09266e+06	1	1843902	8	1068	15	3
1843800	63	562500	Roslyn	4001	Papaioea Ward	40	Palmerston North City	08	Manawatu-Wanganui Region	2.73374e+06	6.09266e+06	1	1843800	10	1161	28	3
1582600	96	551502	Spotswood	3301	New Plymouth City Ward	33	New Plymouth District	07	Taranaki Region	2.60003e+06	6.23654e+06	1	1582600	8	1072	43	3
1581800	57	551501	Lynmouth	3301	New Plymouth City Ward	33	New Plymouth District	07	Taranaki Region	2.60122e+06	6.237e+06	1	1581800	6	977	20	2
1583202	42	551501	Lynmouth	3301	New Plymouth City Ward	33	New Plymouth District	07	Taranaki Region	2.60072e+06	6.237e+06	1	1583202	10	1196	19	3
1583100	132	551501	Lynmouth	3301	New Plymouth City Ward	33	New Plymouth District	07	Taranaki Region	2.60054e+06	6.23694e+06	1	1583100	5	964	46	2
926600	120	529300	Glenview	1603	South Ward	16	Hamilton City	03	Waikato Region	2.71132e+06	6.3733e+06	1	926600	6	987	42	2
2630500	168	595300	Hillmorton	6006	Spreydon-Heathcote Ward	60	Christchurch City	13	Canterbury Region	2.47638e+06	5.73834e+06	1	2630500	6	995	59	2
2120600	66	572900	Thorndon-Tinakori Road	4703	Lambton Ward	47	Wellington City	09	Wellington Region	2.65883e+06	5.99129e+06	1	2120600	3	934	22	1
2631000	123	595300	Hillmorton	6006	Spreydon-Heathcote Ward	60	Christchurch City	13	Canterbury Region	2.4768e+06	5.7384e+06	1	2631000	10	1193	55	3
533100	180	517600	St Lukes	703	Eden-Albert Ward	7	Auckland City	02	Auckland Region	2.66502e+06	6.47989e+06	1	533100	6	977	63	2
2631800	96	595300	Hillmorton	6006	Spreydon-Heathcote Ward	60	Christchurch City	13	Canterbury Region	2.47739e+06	5.73904e+06	1	2631800	5	955	34	2
2645000	81	595000	Spreydon	6006	Spreydon-Heathcote Ward	60	Christchurch City	13	Canterbury Region	2.48005e+06	5.73939e+06	1	2645000	7	1027	28	2
2499100	9	587830	Islington	6004	Riccarton-Wigram Ward	60	Christchurch City	13	Canterbury Region	2.47116e+06	5.7389e+06	1	2499100	3	921	3	1
1976300	60	568701	Waiwhetu North	4605	Eastern Ward	46	Lower Hutt City	09	Wellington Region	2.6709e+06	5.99628e+06	1	1976300	8	1048	27	3
1975700	156	568701	Waiwhetu North	4605	Eastern Ward	46	Lower Hutt City	09	Wellington Region	2.67063e+06	5.9965e+06	1	1975700	10	1169	70	3
1845400	57	562600	Terrace End	4005	Hokowhitu Ward	40	Palmerston North City	08	Manawatu-Wanganui Region	2.73475e+06	6.09242e+06	1	1845400	7	1016	20	2
1844400	99	562500	Roslyn	4001	Papaioea Ward	40	Palmerston North City	08	Manawatu-Wanganui Region	2.73416e+06	6.09309e+06	1	1844400	9	1110	45	3
1844500	36	562500	Roslyn	4001	Papaioea Ward	40	Palmerston North City	08	Manawatu-Wanganui Region	2.73429e+06	6.09307e+06	1	1844500	9	1110	16	3
1583000	90	551501	Lynmouth	3301	New Plymouth City Ward	33	New Plymouth District	07	Taranaki Region	2.6004e+06	6.2369e+06	1	1583000	9	1096	40	3
1582300	42	551501	Lynmouth	3301	New Plymouth City Ward	33	New Plymouth District	07	Taranaki Region	2.60098e+06	6.23692e+06	1	1582300	8	1066	19	3
2630800	219	595300	Hillmorton	6006	Spreydon-Heathcote Ward	60	Christchurch City	13	Canterbury Region	2.47652e+06	5.738e+06	1	2630800	9	1135	99	3
926800	132	529300	Glenview	1603	South Ward	16	Hamilton City	03	Waikato Region	2.71159e+06	6.37314e+06	1	926800	3	926	44	1
926700	138	529300	Glenview	1603	South Ward	16	Hamilton City	03	Waikato Region	2.71131e+06	6.37316e+06	1	926700	7	1011	48	2
1451000	165	547001	Tamatea North	3199	Area Outside Ward	31	Napier City	06	Hawke's Bay Region	2.84298e+06	6.18131e+06	1	1451000	7	1009	58	2
1713900	66	555800	Castlecliff South	3702	Urban Ward	37	Wanganui District	08	Manawatu-Wanganui Region	2.67998e+06	6.13875e+06	1	1713900	8	1033	30	3
1713000	90	555700	Castlecliff North	3702	Urban Ward	37	Wanganui District	08	Manawatu-Wanganui Region	2.67943e+06	6.13876e+06	1	1713000	9	1130	40	3
533200	189	517600	St Lukes	703	Eden-Albert Ward	7	Auckland City	02	Auckland Region	2.66508e+06	6.47974e+06	1	533200	3	923	62	1
8800	57	500204	Herekino	101	Northern Ward	1	Far North District	01	Northland Region	2.53919e+06	6.67802e+06	1	8800	6	986	20	2
403100	156	515431	Surrey Crescent	701	Western Bays Ward	7	Auckland City	02	Auckland Region	2.66474e+06	6.48091e+06	1	403100	3	928	51	1
270800	144	511700	Kelston Central	604	New Lynn Ward	6	Waitakere City	02	Auckland Region	2.65911e+06	6.47725e+06	1	270800	5	971	50	2
2893800	129	603710	Maori Hill	7104	Hills Ward	71	Dunedin City	14	Otago Region	2.31542e+06	5.48021e+06	1	2893800	2	901	43	1
2893500	93	603710	Maori Hill	7104	Hills Ward	71	Dunedin City	14	Otago Region	2.31605e+06	5.48014e+06	1	2893500	3	934	31	1
1976400	129	568701	Waiwhetu North	4605	Eastern Ward	46	Lower Hutt City	09	Wellington Region	2.6713e+06	5.99615e+06	1	1976400	5	964	45	2
1976200	69	568701	Waiwhetu North	4605	Eastern Ward	46	Lower Hutt City	09	Wellington Region	2.67099e+06	5.99645e+06	1	1976200	8	1057	31	3
1976101	51	568701	Waiwhetu North	4605	Eastern Ward	46	Lower Hutt City	09	Wellington Region	2.67085e+06	5.99645e+06	1	1976101	8	1057	23	3
1843700	63	562500	Roslyn	4001	Papaioea Ward	40	Palmerston North City	08	Manawatu-Wanganui Region	2.73379e+06	6.09236e+06	1	1843700	8	1068	28	3
533602	147	517600	St Lukes	703	Eden-Albert Ward	7	Auckland City	02	Auckland Region	2.66527e+06	6.47968e+06	1	533602	6	994	51	2
9001	33	500204	Herekino	101	Northern Ward	1	Far North District	01	Northland Region	2.53327e+06	6.67382e+06	1	9001	9	1077	15	3
9400	129	500204	Herekino	101	Northern Ward	1	Far North District	01	Northland Region	2.54062e+06	6.67388e+06	1	9400	6	981	45	2
9002	3	500301	Kaitaia West	101	Northern Ward	1	Far North District	01	Northland Region	2.53392e+06	6.675e+06	1	9002	9	1111	1	3
533700	90	517600	St Lukes	703	Eden-Albert Ward	7	Auckland City	02	Auckland Region	2.66523e+06	6.47946e+06	1	533700	5	959	31	2
9102	51	500301	Kaitaia West	101	Northern Ward	1	Far North District	01	Northland Region	2.53381e+06	6.67481e+06	1	9102	9	1111	23	3
534400	198	517600	St Lukes	703	Eden-Albert Ward	7	Auckland City	02	Auckland Region	2.66447e+06	6.47904e+06	1	534400	7	1000	69	2
926200	153	529300	Glenview	1603	South Ward	16	Hamilton City	03	Waikato Region	2.7116e+06	6.37342e+06	1	926200	6	987	54	2
2631500	129	595300	Hillmorton	6006	Spreydon-Heathcote Ward	60	Christchurch City	13	Canterbury Region	2.47704e+06	5.73857e+06	1	2631500	6	993	45	2
1716202	132	555900	Mosston	3702	Urban Ward	37	Wanganui District	08	Manawatu-Wanganui Region	2.68142e+06	6.13868e+06	1	1716202	10	1259	59	3
405900	57	515431	Surrey Crescent	701	Western Bays Ward	7	Auckland City	02	Auckland Region	2.66494e+06	6.48042e+06	1	405900	8	1050	26	3
2372600	111	584301	Motueka West	5104	Motueka Ward	51	Tasman District	16	Tasman Region	2.51004e+06	6.00803e+06	1	2372600	4	945	39	2
275200	123	511601	Glendene North	603	Henderson Ward	6	Waitakere City	02	Auckland Region	2.65752e+06	6.47789e+06	1	275200	7	1009	43	2
668901	99	522302	Papatoetoe East	802	Papatoetoe Ward	8	Manukau City	02	Auckland Region	2.67679e+06	6.46806e+06	1	668901	8	1067	45	3
406400	222	515431	Surrey Crescent	701	Western Bays Ward	7	Auckland City	02	Auckland Region	2.66496e+06	6.48024e+06	1	406400	9	1093	100	3
1846700	171	562600	Terrace End	4005	Hokowhitu Ward	40	Palmerston North City	08	Manawatu-Wanganui Region	2.73394e+06	6.09213e+06	1	1846700	6	995	60	2
1846400	81	562600	Terrace End	4005	Hokowhitu Ward	40	Palmerston North City	08	Manawatu-Wanganui Region	2.73412e+06	6.09228e+06	1	1846400	6	976	28	2
667400	123	522301	Dingwall	802	Papatoetoe Ward	8	Manukau City	02	Auckland Region	2.67638e+06	6.46822e+06	1	667400	7	1027	43	2
404000	150	515431	Surrey Crescent	701	Western Bays Ward	7	Auckland City	02	Auckland Region	2.66482e+06	6.48082e+06	1	404000	4	951	52	2
666301	30	522301	Dingwall	802	Papatoetoe Ward	8	Manukau City	02	Auckland Region	2.67616e+06	6.46887e+06	1	666301	7	1002	10	2
665800	111	522301	Dingwall	802	Papatoetoe Ward	8	Manukau City	02	Auckland Region	2.67566e+06	6.46907e+06	1	665800	6	991	39	2
1583600	54	551502	Spotswood	3301	New Plymouth City Ward	33	New Plymouth District	07	Taranaki Region	2.59973e+06	6.2367e+06	1	1583600	6	997	19	2
535100	165	517600	St Lukes	703	Eden-Albert Ward	7	Auckland City	02	Auckland Region	2.66468e+06	6.47881e+06	1	535100	6	990	58	2
2632300	186	595300	Hillmorton	6006	Spreydon-Heathcote Ward	60	Christchurch City	13	Canterbury Region	2.47669e+06	5.73781e+06	1	2632300	10	1143	84	3
2633300	81	595100	Hoon Hay	6006	Spreydon-Heathcote Ward	60	Christchurch City	13	Canterbury Region	2.47784e+06	5.73855e+06	1	2633300	5	962	28	2
2632900	120	595100	Hoon Hay	6006	Spreydon-Heathcote Ward	60	Christchurch City	13	Canterbury Region	2.47749e+06	5.73853e+06	1	2632900	6	996	42	2
928700	84	529200	Melville	1603	South Ward	16	Hamilton City	03	Waikato Region	2.71165e+06	6.37396e+06	1	928700	7	1030	29	2
2631900	231	595300	Hillmorton	6006	Spreydon-Heathcote Ward	60	Christchurch City	13	Canterbury Region	2.4774e+06	5.7387e+06	1	2631900	5	960	81	2
535700	162	517701	Sandringham North	703	Eden-Albert Ward	7	Auckland City	02	Auckland Region	2.66537e+06	6.4789e+06	1	535700	3	933	53	1
2895600	12	602900	Fernhill	7103	Cargill Ward	71	Dunedin City	14	Otago Region	2.31603e+06	5.47789e+06	1	2895600	7	1024	4	2
2895000	6	602800	Harbourside	7103	Cargill Ward	71	Dunedin City	14	Otago Region	2.31626e+06	5.47744e+06	1	2895000	9	1096	3	3
1714900	78	555800	Castlecliff South	3702	Urban Ward	37	Wanganui District	08	Manawatu-Wanganui Region	2.68059e+06	6.13845e+06	1	1714900	10	1197	35	3
404800	24	515420	Grey Lynn East	701	Western Bays Ward	7	Auckland City	02	Auckland Region	2.66549e+06	6.48022e+06	1	404800	5	969	8	2
535300	123	517600	St Lukes	703	Eden-Albert Ward	7	Auckland City	02	Auckland Region	2.66475e+06	6.47861e+06	1	535300	5	966	43	2
405100	99	515431	Surrey Crescent	701	Western Bays Ward	7	Auckland City	02	Auckland Region	2.66474e+06	6.48054e+06	1	405100	8	1040	45	3
404900	69	515431	Surrey Crescent	701	Western Bays Ward	7	Auckland City	02	Auckland Region	2.66418e+06	6.48069e+06	1	404900	5	972	24	2
1583400	123	551502	Spotswood	3301	New Plymouth City Ward	33	New Plymouth District	07	Taranaki Region	2.60008e+06	6.23705e+06	1	1583400	6	987	43	2
273500	66	511602	Glendene South	603	Henderson Ward	6	Waitakere City	02	Auckland Region	2.65848e+06	6.47793e+06	1	273500	7	1007	23	2
2633200	126	595100	Hoon Hay	6006	Spreydon-Heathcote Ward	60	Christchurch City	13	Canterbury Region	2.47756e+06	5.73841e+06	1	2633200	6	992	44	2
928200	60	529200	Melville	1603	South Ward	16	Hamilton City	03	Waikato Region	2.71112e+06	6.37378e+06	1	928200	7	1002	21	2
928600	132	529200	Melville	1603	South Ward	16	Hamilton City	03	Waikato Region	2.71158e+06	6.37389e+06	1	928600	9	1098	59	3
2895500	18	602900	Fernhill	7103	Cargill Ward	71	Dunedin City	14	Otago Region	2.31587e+06	5.47786e+06	1	2895500	7	1024	6	2
1715100	162	555800	Castlecliff South	3702	Urban Ward	37	Wanganui District	08	Manawatu-Wanganui Region	2.68091e+06	6.13835e+06	1	1715100	10	1208	73	3
2894100	63	603710	Maori Hill	7104	Hills Ward	71	Dunedin City	14	Otago Region	2.3155e+06	5.47992e+06	1	2894100	1	889	21	1
534900	75	517600	St Lukes	703	Eden-Albert Ward	7	Auckland City	02	Auckland Region	2.66456e+06	6.4789e+06	1	534900	7	1010	26	2
1977700	84	568702	Waiwhetu South	4602	Harbour Ward	46	Lower Hutt City	09	Wellington Region	2.67043e+06	5.99628e+06	1	1977700	10	1251	38	3
1977900	96	568702	Waiwhetu South	4602	Harbour Ward	46	Lower Hutt City	09	Wellington Region	2.67058e+06	5.99628e+06	1	1977900	6	995	34	2
1976900	90	568701	Waiwhetu North	4605	Eastern Ward	46	Lower Hutt City	09	Wellington Region	2.67031e+06	5.99652e+06	1	1976900	9	1134	40	3
10900	75	500204	Herekino	101	Northern Ward	1	Far North District	01	Northland Region	2.52679e+06	6.66953e+06	1	10900	9	1080	34	3
666800	30	522301	Dingwall	802	Papatoetoe Ward	8	Manukau City	02	Auckland Region	2.67612e+06	6.46869e+06	1	666800	9	1096	14	3
1584200	108	551502	Spotswood	3301	New Plymouth City Ward	33	New Plymouth District	07	Taranaki Region	2.5995e+06	6.23582e+06	1	1584200	3	935	36	1
666302	114	522301	Dingwall	802	Papatoetoe Ward	8	Manukau City	02	Auckland Region	2.67609e+06	6.46901e+06	1	666302	7	1002	40	2
928900	138	529200	Melville	1603	South Ward	16	Hamilton City	03	Waikato Region	2.71087e+06	6.37437e+06	1	928900	3	927	46	1
404600	108	515410	Grey Lynn West	701	Western Bays Ward	7	Auckland City	02	Auckland Region	2.66545e+06	6.4806e+06	1	404600	7	1022	38	2
1715500	165	555900	Mosston	3702	Urban Ward	37	Wanganui District	08	Manawatu-Wanganui Region	2.68071e+06	6.13888e+06	1	1715500	10	1157	74	3
1714700	3	555800	Castlecliff South	3702	Urban Ward	37	Wanganui District	08	Manawatu-Wanganui Region	2.68e+06	6.13827e+06	1	1714700	10	1223	1	3
1715200	93	555800	Castlecliff South	3702	Urban Ward	37	Wanganui District	08	Manawatu-Wanganui Region	2.6809e+06	6.13824e+06	1	1715200	10	1176	42	3
1715800	108	555900	Mosston	3702	Urban Ward	37	Wanganui District	08	Manawatu-Wanganui Region	2.68114e+06	6.13883e+06	1	1715800	10	1325	49	3
2371000	111	584301	Motueka West	5104	Motueka Ward	51	Tasman District	16	Tasman Region	2.50939e+06	6.00733e+06	1	2371000	5	959	39	2
2894200	111	603710	Maori Hill	7104	Hills Ward	71	Dunedin City	14	Otago Region	2.31572e+06	5.47973e+06	1	2894200	2	903	37	1
1976600	102	568701	Waiwhetu North	4605	Eastern Ward	46	Lower Hutt City	09	Wellington Region	2.67063e+06	5.99679e+06	1	1976600	5	962	36	2
1846800	108	562600	Terrace End	4005	Hokowhitu Ward	40	Palmerston North City	08	Manawatu-Wanganui Region	2.73343e+06	6.09199e+06	1	1846800	8	1055	49	3
1846600	150	562600	Terrace End	4005	Hokowhitu Ward	40	Palmerston North City	08	Manawatu-Wanganui Region	2.73378e+06	6.09199e+06	1	1846600	7	1024	52	2
1846200	114	562600	Terrace End	4005	Hokowhitu Ward	40	Palmerston North City	08	Manawatu-Wanganui Region	2.73446e+06	6.09241e+06	1	1846200	7	1001	40	2
666900	120	522301	Dingwall	802	Papatoetoe Ward	8	Manukau City	02	Auckland Region	2.67625e+06	6.4686e+06	1	666900	9	1096	54	3
1190600	189	536514	Bethlehem	2302	Otumoetai-Bethlehem Ward	23	Tauranga City	04	Bay of Plenty Region	2.78411e+06	6.38465e+06	1	1190600	3	929	62	1
2632201	126	595300	Hillmorton	6006	Spreydon-Heathcote Ward	60	Christchurch City	13	Canterbury Region	2.47689e+06	5.73792e+06	1	2632201	9	1127	57	3
2633000	141	595100	Hoon Hay	6006	Spreydon-Heathcote Ward	60	Christchurch City	13	Canterbury Region	2.47769e+06	5.73866e+06	1	2633000	4	952	49	2
929002	42	529200	Melville	1603	South Ward	16	Hamilton City	03	Waikato Region	2.71098e+06	6.37426e+06	1	929002	7	1026	15	2
929400	84	529200	Melville	1603	South Ward	16	Hamilton City	03	Waikato Region	2.71096e+06	6.37417e+06	1	929400	7	1019	29	2
1715900	120	555900	Mosston	3702	Urban Ward	37	Wanganui District	08	Manawatu-Wanganui Region	2.68104e+06	6.13869e+06	1	1715900	10	1166	54	3
1715600	42	555900	Mosston	3702	Urban Ward	37	Wanganui District	08	Manawatu-Wanganui Region	2.68075e+06	6.13879e+06	1	1715600	10	1221	19	3
1714500	6	555800	Castlecliff South	3702	Urban Ward	37	Wanganui District	08	Manawatu-Wanganui Region	2.68074e+06	6.13866e+06	1	1714500	10	1197	3	3
536000	72	517701	Sandringham North	703	Eden-Albert Ward	7	Auckland City	02	Auckland Region	2.66498e+06	6.47863e+06	1	536000	7	1011	25	2
1847000	195	562600	Terrace End	4005	Hokowhitu Ward	40	Palmerston North City	08	Manawatu-Wanganui Region	2.73356e+06	6.09178e+06	1	1847000	8	1055	88	3
1846300	72	562600	Terrace End	4005	Hokowhitu Ward	40	Palmerston North City	08	Manawatu-Wanganui Region	2.73423e+06	6.09231e+06	1	1846300	6	976	25	2
535600	285	517701	Sandringham North	703	Eden-Albert Ward	7	Auckland City	02	Auckland Region	2.66511e+06	6.47883e+06	1	535600	7	1011	100	2
535400	126	517600	St Lukes	703	Eden-Albert Ward	7	Auckland City	02	Auckland Region	2.66488e+06	6.47874e+06	1	535400	6	997	44	2
666200	105	522301	Dingwall	802	Papatoetoe Ward	8	Manukau City	02	Auckland Region	2.67598e+06	6.46887e+06	1	666200	8	1032	47	3
1583500	45	551502	Spotswood	3301	New Plymouth City Ward	33	New Plymouth District	07	Taranaki Region	2.59987e+06	6.23684e+06	1	1583500	6	987	16	2
1190303	90	536514	Bethlehem	2302	Otumoetai-Bethlehem Ward	23	Tauranga City	04	Bay of Plenty Region	2.78479e+06	6.38522e+06	1	1190303	1	884	30	1
2633500	147	595100	Hoon Hay	6006	Spreydon-Heathcote Ward	60	Christchurch City	13	Canterbury Region	2.4777e+06	5.73818e+06	1	2633500	4	951	51	2
928302	99	529200	Melville	1603	South Ward	16	Hamilton City	03	Waikato Region	2.71142e+06	6.37406e+06	1	928302	10	1142	45	3
2895200	9	602800	Harbourside	7106	South Dunedin Ward	71	Dunedin City	14	Otago Region	2.31653e+06	5.47648e+06	1	2895200	9	1096	4	3
2371100	39	584301	Motueka West	5104	Motueka Ward	51	Tasman District	16	Tasman Region	2.50944e+06	6.00684e+06	1	2371100	6	989	14	2
1978001	57	568702	Waiwhetu South	4602	Harbour Ward	46	Lower Hutt City	09	Wellington Region	2.67057e+06	5.99606e+06	1	1978001	4	947	20	2
1977800	81	568702	Waiwhetu South	4602	Harbour Ward	46	Lower Hutt City	09	Wellington Region	2.6704e+06	5.99606e+06	1	1977800	6	995	28	2
404500	90	515410	Grey Lynn West	701	Western Bays Ward	7	Auckland City	02	Auckland Region	2.66536e+06	6.48052e+06	1	404500	5	969	31	2
1977400	105	568702	Waiwhetu South	4602	Harbour Ward	46	Lower Hutt City	09	Wellington Region	2.67027e+06	5.99638e+06	1	1977400	8	1036	47	3
2370700	93	584301	Motueka West	5104	Motueka Ward	51	Tasman District	16	Tasman Region	2.50813e+06	6.01005e+06	1	2370700	8	1039	42	3
666000	69	522301	Dingwall	802	Papatoetoe Ward	8	Manukau City	02	Auckland Region	2.67591e+06	6.46917e+06	1	666000	7	1002	24	2
1583700	39	551502	Spotswood	3301	New Plymouth City Ward	33	New Plymouth District	07	Taranaki Region	2.59959e+06	6.23663e+06	1	1583700	6	997	14	2
665900	117	522301	Dingwall	802	Papatoetoe Ward	8	Manukau City	02	Auckland Region	2.67565e+06	6.46927e+06	1	665900	8	1041	53	3
274202	93	511601	Glendene North	603	Henderson Ward	6	Waitakere City	02	Auckland Region	2.65791e+06	6.47764e+06	1	274202	9	1120	42	3
1715000	168	555800	Castlecliff South	3702	Urban Ward	37	Wanganui District	08	Manawatu-Wanganui Region	2.68095e+06	6.13847e+06	1	1715000	10	1158	76	3
1977300	321	568702	Waiwhetu South	4602	Harbour Ward	46	Lower Hutt City	09	Wellington Region	2.67002e+06	5.99624e+06	1	1977300	10	1154	144	3
1977000	60	568701	Waiwhetu North	4605	Eastern Ward	46	Lower Hutt City	09	Wellington Region	2.67036e+06	5.99655e+06	1	1977000	9	1134	27	3
404200	114	515410	Grey Lynn West	701	Western Bays Ward	7	Auckland City	02	Auckland Region	2.66513e+06	6.4808e+06	1	404200	5	969	40	2
272900	87	511602	Glendene South	603	Henderson Ward	6	Waitakere City	02	Auckland Region	2.65797e+06	6.47758e+06	1	272900	8	1045	39	3
666100	228	522301	Dingwall	802	Papatoetoe Ward	8	Manukau City	02	Auckland Region	2.67584e+06	6.46906e+06	1	666100	7	1018	80	2
535000	117	517600	St Lukes	703	Eden-Albert Ward	7	Auckland City	02	Auckland Region	2.66449e+06	6.47877e+06	1	535000	8	1048	53	3
1583300	30	551501	Lynmouth	3301	New Plymouth City Ward	33	New Plymouth District	07	Taranaki Region	2.60043e+06	6.23652e+06	1	1583300	9	1096	14	3
1190100	147	536514	Bethlehem	2302	Otumoetai-Bethlehem Ward	23	Tauranga City	04	Bay of Plenty Region	2.78379e+06	6.38508e+06	1	1190100	9	1113	66	3
2633400	168	595100	Hoon Hay	6006	Spreydon-Heathcote Ward	60	Christchurch City	13	Canterbury Region	2.47768e+06	5.73835e+06	1	2633400	5	966	59	2
928402	27	529200	Melville	1603	South Ward	16	Hamilton City	03	Waikato Region	2.71134e+06	6.37389e+06	1	928402	7	1030	9	2
928401	81	529200	Melville	1603	South Ward	16	Hamilton City	03	Waikato Region	2.71121e+06	6.37376e+06	1	928401	7	1030	28	2
2632000	12	595300	Hillmorton	6006	Spreydon-Heathcote Ward	60	Christchurch City	13	Canterbury Region	2.47767e+06	5.73884e+06	1	2632000	6	987	4	2
2633100	132	595100	Hoon Hay	6006	Spreydon-Heathcote Ward	60	Christchurch City	13	Canterbury Region	2.47789e+06	5.7387e+06	1	2633100	2	914	44	1
273000	192	511602	Glendene South	603	Henderson Ward	6	Waitakere City	02	Auckland Region	2.65816e+06	6.47749e+06	1	273000	5	972	67	2
1977500	87	568702	Waiwhetu South	4602	Harbour Ward	46	Lower Hutt City	09	Wellington Region	2.67024e+06	5.99629e+06	1	1977500	7	1001	30	2
1977100	30	568701	Waiwhetu North	4605	Eastern Ward	46	Lower Hutt City	09	Wellington Region	2.67023e+06	5.99649e+06	1	1977100	9	1134	14	3
535200	480	517600	St Lukes	703	Eden-Albert Ward	7	Auckland City	02	Auckland Region	2.66462e+06	6.47853e+06	1	535200	7	1005	168	2
404100	63	515410	Grey Lynn West	701	Western Bays Ward	7	Auckland City	02	Auckland Region	2.66499e+06	6.48081e+06	1	404100	5	969	22	2
404400	90	515410	Grey Lynn West	701	Western Bays Ward	7	Auckland City	02	Auckland Region	2.66526e+06	6.48067e+06	1	404400	5	966	31	2
666400	99	522301	Dingwall	802	Papatoetoe Ward	8	Manukau City	02	Auckland Region	2.67634e+06	6.46897e+06	1	666400	8	1032	45	3
1584103	198	551502	Spotswood	3301	New Plymouth City Ward	33	New Plymouth District	07	Taranaki Region	2.59932e+06	6.23624e+06	1	1584103	6	974	69	2
404700	45	515420	Grey Lynn East	701	Western Bays Ward	7	Auckland City	02	Auckland Region	2.66539e+06	6.48031e+06	1	404700	6	979	16	2
2632202	117	595300	Hillmorton	6006	Spreydon-Heathcote Ward	60	Christchurch City	13	Canterbury Region	2.4768e+06	5.73803e+06	1	2632202	7	1027	41	2
928500	120	529200	Melville	1603	South Ward	16	Hamilton City	03	Waikato Region	2.71134e+06	6.37374e+06	1	928500	5	962	42	2
2632800	27	595100	Hoon Hay	6006	Spreydon-Heathcote Ward	60	Christchurch City	13	Canterbury Region	2.47737e+06	5.73843e+06	1	2632800	5	962	9	2
2632400	90	595100	Hoon Hay	6006	Spreydon-Heathcote Ward	60	Christchurch City	13	Canterbury Region	2.47737e+06	5.73819e+06	1	2632400	6	986	31	2
2120800	87	572900	Thorndon-Tinakori Road	4703	Lambton Ward	47	Wellington City	09	Wellington Region	2.65878e+06	5.99119e+06	1	2120800	3	934	29	1
929001	168	529200	Melville	1603	South Ward	16	Hamilton City	03	Waikato Region	2.71089e+06	6.37425e+06	1	929001	7	1026	59	2
1239900	54	540520	Glenholme West	2403	East Ward	24	Rotorua District	04	Bay of Plenty Region	2.79461e+06	6.33435e+06	1	1239900	10	1264	24	3
405000	84	515431	Surrey Crescent	701	Western Bays Ward	7	Auckland City	02	Auckland Region	2.66442e+06	6.48061e+06	1	405000	5	972	29	2
2894800	27	602800	Harbourside	7103	Cargill Ward	71	Dunedin City	14	Otago Region	2.31657e+06	5.47819e+06	1	2894800	9	1096	12	3
2895300	24	602900	Fernhill	7103	Cargill Ward	71	Dunedin City	14	Otago Region	2.31616e+06	5.4781e+06	1	2895300	7	1024	8	2
1715300	21	555800	Castlecliff South	3702	Urban Ward	37	Wanganui District	08	Manawatu-Wanganui Region	2.68083e+06	6.13818e+06	1	1715300	10	1176	9	3
1715700	54	555900	Mosston	3702	Urban Ward	37	Wanganui District	08	Manawatu-Wanganui Region	2.68097e+06	6.13884e+06	1	1715700	9	1123	24	3
1714600	72	555800	Castlecliff South	3702	Urban Ward	37	Wanganui District	08	Manawatu-Wanganui Region	2.67979e+06	6.13818e+06	1	1714600	10	1223	32	3
2370900	54	584301	Motueka West	5104	Motueka Ward	51	Tasman District	16	Tasman Region	2.50942e+06	6.00805e+06	1	2370900	6	989	19	2
1978100	54	568702	Waiwhetu South	4602	Harbour Ward	46	Lower Hutt City	09	Wellington Region	2.67032e+06	5.99592e+06	1	1978100	7	1027	19	2
1977600	168	568702	Waiwhetu South	4602	Harbour Ward	46	Lower Hutt City	09	Wellington Region	2.67019e+06	5.99617e+06	1	1977600	7	1028	59	2
274201	369	511601	Glendene North	603	Henderson Ward	6	Waitakere City	02	Auckland Region	2.65816e+06	6.47806e+06	1	274201	9	1120	166	3
667300	174	522301	Dingwall	802	Papatoetoe Ward	8	Manukau City	02	Auckland Region	2.67652e+06	6.46834e+06	1	667300	6	996	61	2
534800	57	517600	St Lukes	703	Eden-Albert Ward	7	Auckland City	02	Auckland Region	2.66484e+06	6.47902e+06	1	534800	7	1010	20	2
1190200	102	536514	Bethlehem	2302	Otumoetai-Bethlehem Ward	23	Tauranga City	04	Bay of Plenty Region	2.78418e+06	6.38507e+06	1	1190200	5	970	36	2
928301	57	529200	Melville	1603	South Ward	16	Hamilton City	03	Waikato Region	2.7113e+06	6.37414e+06	1	928301	10	1142	26	3
928100	156	529200	Melville	1603	South Ward	16	Hamilton City	03	Waikato Region	2.71095e+06	6.37401e+06	1	928100	7	1002	55	2
2895400	108	602900	Fernhill	7103	Cargill Ward	71	Dunedin City	14	Otago Region	2.31597e+06	5.47805e+06	1	2895400	7	1003	38	2
273600	141	511602	Glendene South	603	Henderson Ward	6	Waitakere City	02	Auckland Region	2.65821e+06	6.47758e+06	1	273600	9	1075	63	3
2898800	147	603000	High St-Stuart St	7103	Cargill Ward	71	Dunedin City	14	Otago Region	2.31552e+06	5.47869e+06	1	2898800	6	997	51	2
1717700	111	556400	Gonville West	3702	Urban Ward	37	Wanganui District	08	Manawatu-Wanganui Region	2.68195e+06	6.13865e+06	1	1717700	10	1287	50	3
1718300	102	556400	Gonville West	3702	Urban Ward	37	Wanganui District	08	Manawatu-Wanganui Region	2.68279e+06	6.13861e+06	1	1718300	10	1152	46	3
1718200	111	556400	Gonville West	3702	Urban Ward	37	Wanganui District	08	Manawatu-Wanganui Region	2.68254e+06	6.13859e+06	1	1718200	8	1052	50	3
1718000	108	556400	Gonville West	3702	Urban Ward	37	Wanganui District	08	Manawatu-Wanganui Region	2.68226e+06	6.13867e+06	1	1718000	10	1353	49	3
670600	171	522302	Papatoetoe East	802	Papatoetoe Ward	8	Manukau City	02	Auckland Region	2.67739e+06	6.46747e+06	1	670600	8	1064	77	3
667601	162	522301	Dingwall	802	Papatoetoe Ward	8	Manukau City	02	Auckland Region	2.67641e+06	6.46852e+06	1	667601	9	1073	73	3
2635700	27	595200	Hoon Hay South	6006	Spreydon-Heathcote Ward	60	Christchurch City	13	Canterbury Region	2.47901e+06	5.73694e+06	1	2635700	3	931	9	1
2635500	123	595200	Hoon Hay South	6006	Spreydon-Heathcote Ward	60	Christchurch City	13	Canterbury Region	2.47873e+06	5.7373e+06	1	2635500	3	927	41	1
2635801	33	595200	Hoon Hay South	6006	Spreydon-Heathcote Ward	60	Christchurch City	13	Canterbury Region	2.47835e+06	5.7375e+06	1	2635801	4	936	12	2
2635000	45	595200	Hoon Hay South	6006	Spreydon-Heathcote Ward	60	Christchurch City	13	Canterbury Region	2.47825e+06	5.73789e+06	1	2635000	3	932	15	1
2633900	87	595100	Hoon Hay	6006	Spreydon-Heathcote Ward	60	Christchurch City	13	Canterbury Region	2.47796e+06	5.73826e+06	1	2633900	3	920	29	1
274503	39	511601	Glendene North	603	Henderson Ward	6	Waitakere City	02	Auckland Region	2.65716e+06	6.47797e+06	1	274503	6	997	14	2
2896400	114	602900	Fernhill	7103	Cargill Ward	71	Dunedin City	14	Otago Region	2.31552e+06	5.47736e+06	1	2896400	10	1202	51	3
1717500	159	556400	Gonville West	3702	Urban Ward	37	Wanganui District	08	Manawatu-Wanganui Region	2.68272e+06	6.13785e+06	1	1717500	9	1125	72	3
1716300	150	556000	Balgownie	3702	Urban Ward	37	Wanganui District	08	Manawatu-Wanganui Region	2.68137e+06	6.13848e+06	1	1716300	10	1302	68	3
406100	129	515431	Surrey Crescent	701	Western Bays Ward	7	Auckland City	02	Auckland Region	2.66475e+06	6.48018e+06	1	406100	10	1540	58	3
1979500	3	568800	Gracefield	4602	Harbour Ward	46	Lower Hutt City	09	Wellington Region	2.66943e+06	5.99507e+06	1	1979500	10	1151	1	3
275400	120	511601	Glendene North	603	Henderson Ward	6	Waitakere City	02	Auckland Region	2.65775e+06	6.47768e+06	1	275400	9	1087	54	3
274502	171	511601	Glendene North	603	Henderson Ward	6	Waitakere City	02	Auckland Region	2.6572e+06	6.47802e+06	1	274502	1	895	56	1
406000	153	515431	Surrey Crescent	701	Western Bays Ward	7	Auckland City	02	Auckland Region	2.66485e+06	6.48029e+06	1	406000	10	1246	69	3
2633800	138	595100	Hoon Hay	6006	Spreydon-Heathcote Ward	60	Christchurch City	13	Canterbury Region	2.47774e+06	5.73802e+06	1	2633800	2	910	46	1
930700	141	529100	Hamilton Lake	1603	South Ward	16	Hamilton City	03	Waikato Region	2.71082e+06	6.37449e+06	1	930700	3	925	47	1
930600	300	529100	Hamilton Lake	1603	South Ward	16	Hamilton City	03	Waikato Region	2.71046e+06	6.37448e+06	1	930600	9	1132	135	3
2896900	60	602900	Fernhill	7103	Cargill Ward	71	Dunedin City	14	Otago Region	2.31575e+06	5.47784e+06	1	2896900	7	1000	21	2
1716800	81	556400	Gonville West	3702	Urban Ward	37	Wanganui District	08	Manawatu-Wanganui Region	2.68259e+06	6.13836e+06	1	1716800	10	1273	36	3
1716700	141	556400	Gonville West	3702	Urban Ward	37	Wanganui District	08	Manawatu-Wanganui Region	2.68249e+06	6.13843e+06	1	1716700	10	1170	63	3
1716900	66	556400	Gonville West	3702	Urban Ward	37	Wanganui District	08	Manawatu-Wanganui Region	2.68229e+06	6.13824e+06	1	1716900	10	1273	30	3
2372801	69	584301	Motueka West	5104	Motueka Ward	51	Tasman District	16	Tasman Region	2.51058e+06	6.00778e+06	1	2372801	7	1029	24	2
1979301	93	568702	Waiwhetu South	4602	Harbour Ward	46	Lower Hutt City	09	Wellington Region	2.67002e+06	5.99598e+06	1	1979301	8	1057	42	3
274700	102	511601	Glendene North	603	Henderson Ward	6	Waitakere City	02	Auckland Region	2.65744e+06	6.47812e+06	1	274700	7	1023	36	2
405600	198	515432	St Lukes North	703	Eden-Albert Ward	7	Auckland City	02	Auckland Region	2.66454e+06	6.47979e+06	1	405600	3	933	65	1
930200	105	529100	Hamilton Lake	1603	South Ward	16	Hamilton City	03	Waikato Region	2.71042e+06	6.37502e+06	1	930200	4	952	37	2
930300	66	529100	Hamilton Lake	1603	South Ward	16	Hamilton City	03	Waikato Region	2.71082e+06	6.37503e+06	1	930300	7	1019	23	2
930102	6	529100	Hamilton Lake	1603	South Ward	16	Hamilton City	03	Waikato Region	2.71099e+06	6.37493e+06	1	930102	2	904	2	1
930400	291	529100	Hamilton Lake	1603	South Ward	16	Hamilton City	03	Waikato Region	2.71053e+06	6.37477e+06	1	930400	7	1007	102	2
406700	66	515431	Surrey Crescent	701	Western Bays Ward	7	Auckland City	02	Auckland Region	2.66502e+06	6.48011e+06	1	406700	5	966	23	2
2896600	87	602900	Fernhill	7103	Cargill Ward	71	Dunedin City	14	Otago Region	2.31548e+06	5.47716e+06	1	2896600	9	1134	39	3
1717100	66	556400	Gonville West	3702	Urban Ward	37	Wanganui District	08	Manawatu-Wanganui Region	2.68269e+06	6.13831e+06	1	1717100	10	1231	30	3
1978200	117	568702	Waiwhetu South	4602	Harbour Ward	46	Lower Hutt City	09	Wellington Region	2.67044e+06	5.99598e+06	1	1978200	7	1027	41	2
1979202	63	568702	Waiwhetu South	4602	Harbour Ward	46	Lower Hutt City	09	Wellington Region	2.67122e+06	5.99599e+06	1	1979202	5	954	22	2
406202	72	515432	St Lukes North	703	Eden-Albert Ward	7	Auckland City	02	Auckland Region	2.66471e+06	6.47994e+06	1	406202	8	1040	32	3
668902	54	522302	Papatoetoe East	802	Papatoetoe Ward	8	Manukau City	02	Auckland Region	2.6767e+06	6.46788e+06	1	668902	8	1067	24	3
668700	264	522302	Papatoetoe East	802	Papatoetoe Ward	8	Manukau City	02	Auckland Region	2.67652e+06	6.46809e+06	1	668700	9	1133	119	3
668801	114	522302	Papatoetoe East	802	Papatoetoe Ward	8	Manukau City	02	Auckland Region	2.67667e+06	6.46806e+06	1	668801	8	1039	51	3
406300	9	515431	Surrey Crescent	701	Western Bays Ward	7	Auckland City	02	Auckland Region	2.66466e+06	6.48012e+06	1	406300	8	1040	4	3
930103	15	529100	Hamilton Lake	1603	South Ward	16	Hamilton City	03	Waikato Region	2.71091e+06	6.37488e+06	1	930103	2	904	5	1
2897200	99	602900	Fernhill	7103	Cargill Ward	71	Dunedin City	14	Otago Region	2.31529e+06	5.47766e+06	1	2897200	9	1099	45	3
2896200	75	602900	Fernhill	7103	Cargill Ward	71	Dunedin City	14	Otago Region	2.31523e+06	5.4775e+06	1	2896200	9	1134	34	3
406502	63	515431	Surrey Crescent	701	Western Bays Ward	7	Auckland City	02	Auckland Region	2.66516e+06	6.48017e+06	1	406502	5	966	22	2
405400	150	515432	St Lukes North	703	Eden-Albert Ward	7	Auckland City	02	Auckland Region	2.66462e+06	6.47987e+06	1	405400	5	959	52	2
1979201	39	568702	Waiwhetu South	4602	Harbour Ward	46	Lower Hutt City	09	Wellington Region	2.6711e+06	5.99585e+06	1	1979201	5	965	14	2
1978800	117	568702	Waiwhetu South	4602	Harbour Ward	46	Lower Hutt City	09	Wellington Region	2.6709e+06	5.9961e+06	1	1978800	4	943	41	2
406800	87	515420	Grey Lynn East	701	Western Bays Ward	7	Auckland City	02	Auckland Region	2.66563e+06	6.48052e+06	1	406800	6	985	30	2
667602	21	522301	Dingwall	802	Papatoetoe Ward	8	Manukau City	02	Auckland Region	2.67631e+06	6.46836e+06	1	667602	9	1073	9	3
2634500	150	595100	Hoon Hay	6006	Spreydon-Heathcote Ward	60	Christchurch City	13	Canterbury Region	2.47857e+06	5.73824e+06	1	2634500	5	967	52	2
274300	75	511601	Glendene North	603	Henderson Ward	6	Waitakere City	02	Auckland Region	2.65789e+06	6.47801e+06	1	274300	7	1026	26	2
930500	66	529100	Hamilton Lake	1603	South Ward	16	Hamilton City	03	Waikato Region	2.71079e+06	6.37464e+06	1	930500	7	1007	23	2
1717400	165	556400	Gonville West	3702	Urban Ward	37	Wanganui District	08	Manawatu-Wanganui Region	2.6827e+06	6.13797e+06	1	1717400	10	1241	74	3
1717300	105	556400	Gonville West	3702	Urban Ward	37	Wanganui District	08	Manawatu-Wanganui Region	2.68265e+06	6.1381e+06	1	1717300	10	1334	47	3
2896700	108	602900	Fernhill	7103	Cargill Ward	71	Dunedin City	14	Otago Region	2.31574e+06	5.478e+06	1	2896700	9	1099	49	3
1716100	75	555900	Mosston	3702	Urban Ward	37	Wanganui District	08	Manawatu-Wanganui Region	2.68126e+06	6.13856e+06	1	1716100	10	1221	34	3
1978900	138	568702	Waiwhetu South	4602	Harbour Ward	46	Lower Hutt City	09	Wellington Region	2.67113e+06	5.99607e+06	1	1978900	6	982	48	2
12500	75	500208	Motutangi-Kareponia	101	Northern Ward	1	Far North District	01	Northland Region	2.53261e+06	6.68605e+06	1	12500	8	1049	34	3
12601	27	500208	Motutangi-Kareponia	101	Northern Ward	1	Far North District	01	Northland Region	2.53405e+06	6.68539e+06	1	12601	8	1049	12	3
274800	105	511601	Glendene North	603	Henderson Ward	6	Waitakere City	02	Auckland Region	2.65771e+06	6.47797e+06	1	274800	5	965	37	2
12702	99	500100	Awanui	101	Northern Ward	1	Far North District	01	Northland Region	2.5341e+06	6.68473e+06	1	12702	9	1100	45	3
12602	18	500100	Awanui	101	Northern Ward	1	Far North District	01	Northland Region	2.53417e+06	6.68464e+06	1	12602	8	1049	8	3
12701	66	500208	Motutangi-Kareponia	101	Northern Ward	1	Far North District	01	Northland Region	2.53263e+06	6.68427e+06	1	12701	9	1100	30	3
274402	129	511601	Glendene North	603	Henderson Ward	6	Waitakere City	02	Auckland Region	2.65785e+06	6.47788e+06	1	274402	7	1010	45	2
1586202	18	551400	Moturoa	3301	New Plymouth City Ward	33	New Plymouth District	07	Taranaki Region	2.60007e+06	6.23724e+06	1	1586202	7	1003	6	2
2634800	123	595100	Hoon Hay	6006	Spreydon-Heathcote Ward	60	Christchurch City	13	Canterbury Region	2.47811e+06	5.73809e+06	1	2634800	6	994	43	2
2634400	138	595100	Hoon Hay	6006	Spreydon-Heathcote Ward	60	Christchurch City	13	Canterbury Region	2.47844e+06	5.73817e+06	1	2634400	6	983	48	2
2896300	159	602900	Fernhill	7103	Cargill Ward	71	Dunedin City	14	Otago Region	2.3154e+06	5.47735e+06	1	2896300	10	1140	72	3
2896800	177	602900	Fernhill	7103	Cargill Ward	71	Dunedin City	14	Otago Region	2.31549e+06	5.47787e+06	1	2896800	9	1084	80	3
1716400	132	556000	Balgownie	3702	Urban Ward	37	Wanganui District	08	Manawatu-Wanganui Region	2.68135e+06	6.1383e+06	1	1716400	10	1303	59	3
2502800	15	590604	Styx	6001	Shirley-Papanui Ward	60	Christchurch City	13	Canterbury Region	2.48172e+06	5.75395e+06	1	2502800	6	976	5	2
1979203	54	568702	Waiwhetu South	4602	Harbour Ward	46	Lower Hutt City	09	Wellington Region	2.67139e+06	5.99607e+06	1	1979203	5	965	19	2
274401	132	511601	Glendene North	603	Henderson Ward	6	Waitakere City	02	Auckland Region	2.65789e+06	6.47774e+06	1	274401	4	949	46	2
2634900	33	595100	Hoon Hay	6006	Spreydon-Heathcote Ward	60	Christchurch City	13	Canterbury Region	2.47833e+06	5.73807e+06	1	2634900	6	994	12	2
2633700	126	595100	Hoon Hay	6006	Spreydon-Heathcote Ward	60	Christchurch City	13	Canterbury Region	2.47809e+06	5.73837e+06	1	2633700	6	994	44	2
930101	90	529100	Hamilton Lake	1603	South Ward	16	Hamilton City	03	Waikato Region	2.71088e+06	6.37511e+06	1	930101	2	904	30	1
929604	66	529100	Hamilton Lake	1603	South Ward	16	Hamilton City	03	Waikato Region	2.71017e+06	6.37504e+06	1	929604	4	938	23	2
2896500	93	602900	Fernhill	7103	Cargill Ward	71	Dunedin City	14	Otago Region	2.31538e+06	5.47716e+06	1	2896500	7	1024	33	2
2895700	18	602900	Fernhill	7103	Cargill Ward	71	Dunedin City	14	Otago Region	2.31584e+06	5.4777e+06	1	2895700	7	1024	6	2
2897000	114	602900	Fernhill	7103	Cargill Ward	71	Dunedin City	14	Otago Region	2.31526e+06	5.47775e+06	1	2897000	7	1000	40	2
2897100	114	602900	Fernhill	7103	Cargill Ward	71	Dunedin City	14	Otago Region	2.31556e+06	5.47777e+06	1	2897100	8	1048	51	3
274600	168	511601	Glendene North	603	Henderson Ward	6	Waitakere City	02	Auckland Region	2.65721e+06	6.47788e+06	1	274600	7	1014	59	2
275300	99	511601	Glendene North	603	Henderson Ward	6	Waitakere City	02	Auckland Region	2.65764e+06	6.47772e+06	1	275300	7	1009	35	2
668802	33	522302	Papatoetoe East	802	Papatoetoe Ward	8	Manukau City	02	Auckland Region	2.67653e+06	6.46791e+06	1	668802	8	1039	15	3
667500	123	522301	Dingwall	802	Papatoetoe Ward	8	Manukau City	02	Auckland Region	2.67624e+06	6.46843e+06	1	667500	10	1143	55	3
274501	138	511601	Glendene North	603	Henderson Ward	6	Waitakere City	02	Auckland Region	2.65708e+06	6.47816e+06	1	274501	6	997	48	2
405500	120	515432	St Lukes North	703	Eden-Albert Ward	7	Auckland City	02	Auckland Region	2.66432e+06	6.47978e+06	1	405500	4	938	42	2
406201	36	515431	Surrey Crescent	701	Western Bays Ward	7	Auckland City	02	Auckland Region	2.66476e+06	6.48011e+06	1	406201	8	1040	16	3
2633600	81	595100	Hoon Hay	6006	Spreydon-Heathcote Ward	60	Christchurch City	13	Canterbury Region	2.47773e+06	5.73829e+06	1	2633600	3	920	27	1
275000	171	511601	Glendene North	603	Henderson Ward	6	Waitakere City	02	Auckland Region	2.65727e+06	6.47775e+06	1	275000	6	974	60	2
2896100	156	602900	Fernhill	7103	Cargill Ward	71	Dunedin City	14	Otago Region	2.31505e+06	5.47766e+06	1	2896100	7	1027	55	2
1717000	60	556400	Gonville West	3702	Urban Ward	37	Wanganui District	08	Manawatu-Wanganui Region	2.68245e+06	6.13824e+06	1	1717000	10	1334	27	3
1716201	105	555900	Mosston	3702	Urban Ward	37	Wanganui District	08	Manawatu-Wanganui Region	2.68146e+06	6.1388e+06	1	1716201	10	1579	47	3
1717200	90	556400	Gonville West	3702	Urban Ward	37	Wanganui District	08	Manawatu-Wanganui Region	2.68277e+06	6.1382e+06	1	1717200	10	1231	40	3
2372700	108	584301	Motueka West	5104	Motueka Ward	51	Tasman District	16	Tasman Region	2.50987e+06	6.00729e+06	1	2372700	7	1019	38	2
405700	192	515432	St Lukes North	703	Eden-Albert Ward	7	Auckland City	02	Auckland Region	2.66452e+06	6.47967e+06	1	405700	2	899	63	1
1979002	57	568702	Waiwhetu South	4602	Harbour Ward	46	Lower Hutt City	09	Wellington Region	2.671e+06	5.99592e+06	1	1979002	5	954	20	2
12902	51	500301	Kaitaia West	101	Northern Ward	1	Far North District	01	Northland Region	2.53429e+06	6.67786e+06	1	12902	8	1060	23	3
1978700	120	568702	Waiwhetu South	4602	Harbour Ward	46	Lower Hutt City	09	Wellington Region	2.67078e+06	5.99619e+06	1	1978700	7	1023	42	2
13207	90	500302	Kaitaia East	101	Northern Ward	1	Far North District	01	Northland Region	2.53498e+06	6.67777e+06	1	13207	10	1252	40	3
13205	102	500302	Kaitaia East	101	Northern Ward	1	Far North District	01	Northland Region	2.53458e+06	6.67794e+06	1	13205	10	1252	46	3
13206	159	500302	Kaitaia East	101	Northern Ward	1	Far North District	01	Northland Region	2.53487e+06	6.67777e+06	1	13206	10	1351	72	3
13300	276	500302	Kaitaia East	101	Northern Ward	1	Far North District	01	Northland Region	2.5346e+06	6.67742e+06	1	13300	9	1126	124	3
405300	156	515431	Surrey Crescent	701	Western Bays Ward	7	Auckland City	02	Auckland Region	2.66498e+06	6.4805e+06	1	405300	6	977	55	2
13203	273	500302	Kaitaia East	101	Northern Ward	1	Far North District	01	Northland Region	2.53496e+06	6.67731e+06	1	13203	10	1247	123	3
12903	114	500301	Kaitaia West	101	Northern Ward	1	Far North District	01	Northland Region	2.53432e+06	6.67724e+06	1	12903	8	1060	51	3
13400	144	500302	Kaitaia East	101	Northern Ward	1	Far North District	01	Northland Region	2.53451e+06	6.6772e+06	1	13400	8	1071	65	3
13204	54	500302	Kaitaia East	101	Northern Ward	1	Far North District	01	Northland Region	2.53472e+06	6.67718e+06	1	13204	10	1247	24	3
13100	240	500301	Kaitaia West	101	Northern Ward	1	Far North District	01	Northland Region	2.53424e+06	6.67685e+06	1	13100	10	1242	108	3
13600	48	500302	Kaitaia East	101	Northern Ward	1	Far North District	01	Northland Region	2.53463e+06	6.67689e+06	1	13600	9	1085	22	3
13500	15	500301	Kaitaia West	101	Northern Ward	1	Far North District	01	Northland Region	2.53447e+06	6.67684e+06	1	13500	9	1085	7	3
536400	114	517701	Sandringham North	703	Eden-Albert Ward	7	Auckland City	02	Auckland Region	2.66534e+06	6.47881e+06	1	536400	4	939	40	2
406600	162	515431	Surrey Crescent	701	Western Bays Ward	7	Auckland City	02	Auckland Region	2.66521e+06	6.48033e+06	1	406600	7	1015	57	2
668400	204	522302	Papatoetoe East	802	Papatoetoe Ward	8	Manukau City	02	Auckland Region	2.67668e+06	6.46832e+06	1	668400	9	1100	92	3
405800	117	515431	Surrey Crescent	701	Western Bays Ward	7	Auckland City	02	Auckland Region	2.66515e+06	6.48045e+06	1	405800	8	1050	53	3
406501	78	515431	Surrey Crescent	701	Western Bays Ward	7	Auckland City	02	Auckland Region	2.66515e+06	6.48028e+06	1	406501	5	966	27	2
274900	60	511601	Glendene North	603	Henderson Ward	6	Waitakere City	02	Auckland Region	2.65781e+06	6.47815e+06	1	274900	7	1023	21	2
541400	156	517702	Sandringham West	703	Eden-Albert Ward	7	Auckland City	02	Auckland Region	2.66494e+06	6.47715e+06	1	541400	8	1039	70	3
409900	51	515420	Grey Lynn East	701	Western Bays Ward	7	Auckland City	02	Auckland Region	2.66605e+06	6.48047e+06	1	409900	4	941	18	2
1720000	153	556500	Springvale West	3702	Urban Ward	37	Wanganui District	08	Manawatu-Wanganui Region	2.68281e+06	6.13978e+06	1	1720000	6	993	54	2
672101	132	522400	Puhinui	802	Papatoetoe Ward	8	Manukau City	02	Auckland Region	2.67637e+06	6.46681e+06	1	672101	6	995	46	2
541000	108	517702	Sandringham West	703	Eden-Albert Ward	7	Auckland City	02	Auckland Region	2.66486e+06	6.47749e+06	1	541000	7	1028	38	2
2635802	120	595200	Hoon Hay South	6006	Spreydon-Heathcote Ward	60	Christchurch City	13	Canterbury Region	2.47838e+06	5.73735e+06	1	2635802	4	936	42	2
2898400	66	603000	High St-Stuart St	7103	Cargill Ward	71	Dunedin City	14	Otago Region	2.3152e+06	5.47798e+06	1	2898400	8	1059	30	3
2898300	90	603000	High St-Stuart St	7103	Cargill Ward	71	Dunedin City	14	Otago Region	2.31538e+06	5.47795e+06	1	2898300	9	1092	40	3
539500	36	517703	Sandringham East	703	Eden-Albert Ward	7	Auckland City	02	Auckland Region	2.66533e+06	6.47683e+06	1	539500	6	991	13	2
408000	66	515410	Grey Lynn West	701	Western Bays Ward	7	Auckland City	02	Auckland Region	2.66537e+06	6.4807e+06	1	408000	6	985	23	2
538800	105	517703	Sandringham East	703	Eden-Albert Ward	7	Auckland City	02	Auckland Region	2.66544e+06	6.4771e+06	1	538800	6	978	37	2
2898900	9	603000	High St-Stuart St	7103	Cargill Ward	71	Dunedin City	14	Otago Region	2.31567e+06	5.47861e+06	1	2898900	8	1032	4	3
1717800	81	556400	Gonville West	3702	Urban Ward	37	Wanganui District	08	Manawatu-Wanganui Region	2.68205e+06	6.13856e+06	1	1717800	10	1388	36	3
1718100	84	556400	Gonville West	3702	Urban Ward	37	Wanganui District	08	Manawatu-Wanganui Region	2.68228e+06	6.13851e+06	1	1718100	10	1302	38	3
2636500	162	595200	Hoon Hay South	6006	Spreydon-Heathcote Ward	60	Christchurch City	13	Canterbury Region	2.47876e+06	5.73673e+06	1	2636500	3	926	53	1
2635100	102	595200	Hoon Hay South	6006	Spreydon-Heathcote Ward	60	Christchurch City	13	Canterbury Region	2.47834e+06	5.73773e+06	1	2635100	4	950	36	2
1587501	81	551400	Moturoa	3301	New Plymouth City Ward	33	New Plymouth District	07	Taranaki Region	2.6014e+06	6.23768e+06	1	1587501	8	1049	36	3
407800	105	515410	Grey Lynn West	701	Western Bays Ward	7	Auckland City	02	Auckland Region	2.66561e+06	6.48095e+06	1	407800	3	919	35	1
932400	30	529100	Hamilton Lake	1603	South Ward	16	Hamilton City	03	Waikato Region	2.71108e+06	6.37498e+06	1	932400	7	1008	10	2
2898600	141	603000	High St-Stuart St	7103	Cargill Ward	71	Dunedin City	14	Otago Region	2.31511e+06	5.47782e+06	1	2898600	8	1043	63	3
931400	87	529100	Hamilton Lake	1603	South Ward	16	Hamilton City	03	Waikato Region	2.71116e+06	6.37594e+06	1	931400	6	986	30	2
1717900	63	556400	Gonville West	3702	Urban Ward	37	Wanganui District	08	Manawatu-Wanganui Region	2.6821e+06	6.13845e+06	1	1717900	10	1302	28	3
406900	90	515420	Grey Lynn East	701	Western Bays Ward	7	Auckland City	02	Auckland Region	2.66556e+06	6.48046e+06	1	406900	5	969	31	2
407700	90	515420	Grey Lynn East	701	Western Bays Ward	7	Auckland City	02	Auckland Region	2.66571e+06	6.481e+06	1	407700	2	917	30	1
408200	69	515420	Grey Lynn East	701	Western Bays Ward	7	Auckland City	02	Auckland Region	2.66578e+06	6.48084e+06	1	408200	4	952	24	2
407600	96	515410	Grey Lynn West	701	Western Bays Ward	7	Auckland City	02	Auckland Region	2.6654e+06	6.48124e+06	1	407600	4	952	34	2
1588200	156	551900	Kawaroa	3301	New Plymouth City Ward	33	New Plymouth District	07	Taranaki Region	2.60182e+06	6.238e+06	1	1588200	7	1027	55	2
1588100	165	551900	Kawaroa	3301	New Plymouth City Ward	33	New Plymouth District	07	Taranaki Region	2.6016e+06	6.23793e+06	1	1588100	6	986	58	2
407100	63	515420	Grey Lynn East	701	Western Bays Ward	7	Auckland City	02	Auckland Region	2.66556e+06	6.48028e+06	1	407100	6	979	22	2
931600	87	529100	Hamilton Lake	1603	South Ward	16	Hamilton City	03	Waikato Region	2.71173e+06	6.37606e+06	1	931600	6	986	30	2
407300	69	515420	Grey Lynn East	701	Western Bays Ward	7	Auckland City	02	Auckland Region	2.66574e+06	6.48038e+06	1	407300	5	969	24	2
538900	102	517703	Sandringham East	703	Eden-Albert Ward	7	Auckland City	02	Auckland Region	2.66513e+06	6.47701e+06	1	538900	6	981	36	2
408500	174	515410	Grey Lynn West	701	Western Bays Ward	7	Auckland City	02	Auckland Region	2.66549e+06	6.48122e+06	1	408500	4	944	61	2
2636000	72	595200	Hoon Hay South	6006	Spreydon-Heathcote Ward	60	Christchurch City	13	Canterbury Region	2.47848e+06	5.73706e+06	1	2636000	3	931	24	1
1586700	102	551400	Moturoa	3301	New Plymouth City Ward	33	New Plymouth District	07	Taranaki Region	2.60068e+06	6.23745e+06	1	1586700	9	1112	46	3
1587400	30	551400	Moturoa	3301	New Plymouth City Ward	33	New Plymouth District	07	Taranaki Region	2.60133e+06	6.23754e+06	1	1587400	5	956	10	2
538700	141	517703	Sandringham East	703	Eden-Albert Ward	7	Auckland City	02	Auckland Region	2.66521e+06	6.47709e+06	1	538700	10	1149	63	3
2636800	228	594900	Barrington South	6006	Spreydon-Heathcote Ward	60	Christchurch City	13	Canterbury Region	2.47904e+06	5.73826e+06	1	2636800	3	928	75	1
932200	78	529100	Hamilton Lake	1603	South Ward	16	Hamilton City	03	Waikato Region	2.71136e+06	6.37544e+06	1	932200	6	979	27	2
2898100	69	603000	High St-Stuart St	7103	Cargill Ward	71	Dunedin City	14	Otago Region	2.31546e+06	5.47814e+06	1	2898100	9	1092	31	3
2897400	144	602900	Fernhill	7103	Cargill Ward	71	Dunedin City	14	Otago Region	2.31536e+06	5.47754e+06	1	2897400	6	996	50	2
539600	39	517703	Sandringham East	703	Eden-Albert Ward	7	Auckland City	02	Auckland Region	2.66537e+06	6.47682e+06	1	539600	6	991	14	2
407900	159	515410	Grey Lynn West	701	Western Bays Ward	7	Auckland City	02	Auckland Region	2.66538e+06	6.48082e+06	1	407900	6	997	56	2
407000	75	515420	Grey Lynn East	701	Western Bays Ward	7	Auckland City	02	Auckland Region	2.66548e+06	6.48039e+06	1	407000	5	969	26	2
931500	75	529100	Hamilton Lake	1603	South Ward	16	Hamilton City	03	Waikato Region	2.71149e+06	6.37612e+06	1	931500	9	1109	34	3
1718500	117	556100	Tawhero	3702	Urban Ward	37	Wanganui District	08	Manawatu-Wanganui Region	2.68168e+06	6.13876e+06	1	1718500	10	1178	53	3
538300	108	517703	Sandringham East	703	Eden-Albert Ward	7	Auckland City	02	Auckland Region	2.66526e+06	6.47743e+06	1	538300	4	946	38	2
1586600	57	551400	Moturoa	3301	New Plymouth City Ward	33	New Plymouth District	07	Taranaki Region	2.60045e+06	6.23734e+06	1	1586600	9	1112	26	3
2635900	129	595200	Hoon Hay South	6006	Spreydon-Heathcote Ward	60	Christchurch City	13	Canterbury Region	2.47854e+06	5.73742e+06	1	2635900	4	952	45	2
2635200	189	595200	Hoon Hay South	6006	Spreydon-Heathcote Ward	60	Christchurch City	13	Canterbury Region	2.47846e+06	5.73778e+06	1	2635200	4	946	66	2
2897600	3	602900	Fernhill	7103	Cargill Ward	71	Dunedin City	14	Otago Region	2.31558e+06	5.47749e+06	1	2897600	9	1108	1	3
931700	231	529100	Hamilton Lake	1603	South Ward	16	Hamilton City	03	Waikato Region	2.71116e+06	6.37574e+06	1	931700	9	1074	104	3
2898200	78	603000	High St-Stuart St	7103	Cargill Ward	71	Dunedin City	14	Otago Region	2.31555e+06	5.47803e+06	1	2898200	9	1092	35	3
1717600	72	556400	Gonville West	3702	Urban Ward	37	Wanganui District	08	Manawatu-Wanganui Region	2.68182e+06	6.13857e+06	1	1717600	10	1388	32	3
408100	153	515410	Grey Lynn West	701	Western Bays Ward	7	Auckland City	02	Auckland Region	2.66561e+06	6.48067e+06	1	408100	4	940	54	2
408600	84	515410	Grey Lynn West	701	Western Bays Ward	7	Auckland City	02	Auckland Region	2.66559e+06	6.48118e+06	1	408600	3	919	28	1
276101	24	511800	Sunnyvale	603	Henderson Ward	6	Waitakere City	02	Auckland Region	2.65683e+06	6.47783e+06	1	276101	5	959	8	2
2636400	99	595200	Hoon Hay South	6006	Spreydon-Heathcote Ward	60	Christchurch City	13	Canterbury Region	2.47881e+06	5.73689e+06	1	2636400	2	906	33	1
2636300	33	595200	Hoon Hay South	6006	Spreydon-Heathcote Ward	60	Christchurch City	13	Canterbury Region	2.47859e+06	5.73686e+06	1	2636300	2	906	11	1
407200	48	515420	Grey Lynn East	701	Western Bays Ward	7	Auckland City	02	Auckland Region	2.66565e+06	6.48032e+06	1	407200	5	969	17	2
2636700	141	594900	Barrington South	6006	Spreydon-Heathcote Ward	60	Christchurch City	13	Canterbury Region	2.4793e+06	5.73849e+06	1	2636700	8	1036	63	3
2898500	42	603000	High St-Stuart St	7103	Cargill Ward	71	Dunedin City	14	Otago Region	2.31527e+06	5.4779e+06	1	2898500	8	1059	19	3
932000	84	529100	Hamilton Lake	1603	South Ward	16	Hamilton City	03	Waikato Region	2.71161e+06	6.37596e+06	1	932000	9	1074	38	3
681328	96	522722	Aberfeldy	806	Howick Ward	8	Manukau City	02	Auckland Region	2.68056e+06	6.47535e+06	1	681328	4	936	34	2
669601	120	522302	Papatoetoe East	802	Papatoetoe Ward	8	Manukau City	02	Auckland Region	2.6769e+06	6.468e+06	1	669601	8	1050	54	3
2635300	120	595200	Hoon Hay South	6006	Spreydon-Heathcote Ward	60	Christchurch City	13	Canterbury Region	2.47831e+06	5.73761e+06	1	2635300	3	932	40	1
407400	99	515420	Grey Lynn East	701	Western Bays Ward	7	Auckland City	02	Auckland Region	2.66583e+06	6.48042e+06	1	407400	5	954	35	2
2897700	138	603000	High St-Stuart St	7103	Cargill Ward	71	Dunedin City	14	Otago Region	2.31488e+06	5.47776e+06	1	2897700	5	968	48	2
539400	90	517703	Sandringham East	703	Eden-Albert Ward	7	Auckland City	02	Auckland Region	2.66526e+06	6.47684e+06	1	539400	10	1152	40	3
408300	78	515420	Grey Lynn East	701	Western Bays Ward	7	Auckland City	02	Auckland Region	2.66587e+06	6.48089e+06	1	408300	4	952	27	2
276102	45	511800	Sunnyvale	603	Henderson Ward	6	Waitakere City	02	Auckland Region	2.65693e+06	6.47784e+06	1	276102	5	959	16	2
2636100	144	595200	Hoon Hay South	6006	Spreydon-Heathcote Ward	60	Christchurch City	13	Canterbury Region	2.47855e+06	5.73712e+06	1	2636100	4	947	50	2
2636200	156	595200	Hoon Hay South	6006	Spreydon-Heathcote Ward	60	Christchurch City	13	Canterbury Region	2.4787e+06	5.73711e+06	1	2636200	6	977	55	2
1587502	18	551501	Lynmouth	3301	New Plymouth City Ward	33	New Plymouth District	07	Taranaki Region	2.60151e+06	6.23758e+06	1	1587502	8	1049	8	3
2635400	243	595200	Hoon Hay South	6006	Spreydon-Heathcote Ward	60	Christchurch City	13	Canterbury Region	2.47858e+06	5.73781e+06	1	2635400	3	930	80	1
276700	63	511800	Sunnyvale	603	Henderson Ward	6	Waitakere City	02	Auckland Region	2.65676e+06	6.47782e+06	1	276700	5	964	22	2
931900	225	529100	Hamilton Lake	1603	South Ward	16	Hamilton City	03	Waikato Region	2.71142e+06	6.37584e+06	1	931900	7	1001	79	2
538500	213	517703	Sandringham East	703	Eden-Albert Ward	7	Auckland City	02	Auckland Region	2.6653e+06	6.4773e+06	1	538500	10	1165	96	3
2897500	132	602900	Fernhill	7103	Cargill Ward	71	Dunedin City	14	Otago Region	2.31556e+06	5.47765e+06	1	2897500	9	1108	59	3
2897300	48	602900	Fernhill	7103	Cargill Ward	71	Dunedin City	14	Otago Region	2.3154e+06	5.47768e+06	1	2897300	9	1108	22	3
2898700	69	603000	High St-Stuart St	7103	Cargill Ward	71	Dunedin City	14	Otago Region	2.31551e+06	5.47881e+06	1	2898700	5	964	24	2
1718700	78	556100	Tawhero	3702	Urban Ward	37	Wanganui District	08	Manawatu-Wanganui Region	2.68194e+06	6.13881e+06	1	1718700	10	1166	35	3
538600	156	517703	Sandringham East	703	Eden-Albert Ward	7	Auckland City	02	Auckland Region	2.66528e+06	6.47717e+06	1	538600	8	1042	70	3
14300	96	500302	Kaitaia East	101	Northern Ward	1	Far North District	01	Northland Region	2.53556e+06	6.67629e+06	1	14300	7	1017	34	2
13700	102	500302	Kaitaia East	101	Northern Ward	1	Far North District	01	Northland Region	2.53477e+06	6.67698e+06	1	13700	10	1236	46	3
13900	96	500302	Kaitaia East	101	Northern Ward	1	Far North District	01	Northland Region	2.53494e+06	6.67683e+06	1	13900	9	1106	43	3
14100	21	500302	Kaitaia East	101	Northern Ward	1	Far North District	01	Northland Region	2.53505e+06	6.67667e+06	1	14100	9	1085	9	3
669300	159	522302	Papatoetoe East	802	Papatoetoe Ward	8	Manukau City	02	Auckland Region	2.67723e+06	6.46758e+06	1	669300	8	1059	72	3
14000	6	500302	Kaitaia East	101	Northern Ward	1	Far North District	01	Northland Region	2.53492e+06	6.67651e+06	1	14000	9	1106	3	3
14200	15	500302	Kaitaia East	101	Northern Ward	1	Far North District	01	Northland Region	2.53507e+06	6.67625e+06	1	14200	9	1085	7	3
14700	54	500301	Kaitaia West	101	Northern Ward	1	Far North District	01	Northland Region	2.5348e+06	6.676e+06	1	14700	9	1085	24	3
14400	267	500302	Kaitaia East	101	Northern Ward	1	Far North District	01	Northland Region	2.53594e+06	6.67609e+06	1	14400	8	1040	120	3
14600	3	500301	Kaitaia West	101	Northern Ward	1	Far North District	01	Northland Region	2.53493e+06	6.67618e+06	1	14600	9	1085	1	3
14500	9	500302	Kaitaia East	101	Northern Ward	1	Far North District	01	Northland Region	2.53557e+06	6.67616e+06	1	14500	7	1017	3	2
15200	69	500301	Kaitaia West	101	Northern Ward	1	Far North District	01	Northland Region	2.5343e+06	6.67573e+06	1	15200	9	1125	31	3
15100	102	500301	Kaitaia West	101	Northern Ward	1	Far North District	01	Northland Region	2.53519e+06	6.67591e+06	1	15100	9	1092	46	3
14800	18	500301	Kaitaia West	101	Northern Ward	1	Far North District	01	Northland Region	2.53465e+06	6.67589e+06	1	14800	9	1085	8	3
15000	66	500301	Kaitaia West	101	Northern Ward	1	Far North District	01	Northland Region	2.53486e+06	6.67578e+06	1	15000	9	1092	30	3
14900	171	500301	Kaitaia West	101	Northern Ward	1	Far North District	01	Northland Region	2.53474e+06	6.67559e+06	1	14900	7	1008	60	2
15300	198	500301	Kaitaia West	101	Northern Ward	1	Far North District	01	Northland Region	2.53456e+06	6.67543e+06	1	15300	9	1086	89	3
2635600	90	595200	Hoon Hay South	6006	Spreydon-Heathcote Ward	60	Christchurch City	13	Canterbury Region	2.47888e+06	5.73708e+06	1	2635600	3	931	30	1
931800	135	529100	Hamilton Lake	1603	South Ward	16	Hamilton City	03	Waikato Region	2.7113e+06	6.3758e+06	1	931800	6	977	47	2
2901000	3	603100	Stuart St-Frederick St	7103	Cargill Ward	71	Dunedin City	14	Otago Region	2.31627e+06	5.47864e+06	1	2901000	9	1128	1	3
2902300	45	603100	Stuart St-Frederick St	7103	Cargill Ward	71	Dunedin City	14	Otago Region	2.31621e+06	5.47913e+06	1	2902300	9	1109	20	3
1721600	81	556700	Wanganui Collegiate	3702	Urban Ward	37	Wanganui District	08	Manawatu-Wanganui Region	2.68443e+06	6.13961e+06	1	1721600	4	952	28	2
2378101	189	584303	Motueka East	5104	Motueka Ward	51	Tasman District	16	Tasman Region	2.51108e+06	6.01019e+06	1	2378101	7	1000	66	2
674200	150	524601	Manukau Central	802	Papatoetoe Ward	8	Manukau City	02	Auckland Region	2.67573e+06	6.46617e+06	1	674200	10	1145	68	3
2377200	102	584301	Motueka West	5104	Motueka Ward	51	Tasman District	16	Tasman Region	2.51035e+06	6.01112e+06	1	2377200	7	1024	36	2
2377300	72	584301	Motueka West	5104	Motueka Ward	51	Tasman District	16	Tasman Region	2.51035e+06	6.01102e+06	1	2377300	8	1062	32	3
409400	81	515420	Grey Lynn East	701	Western Bays Ward	7	Auckland City	02	Auckland Region	2.6658e+06	6.48064e+06	1	409400	4	937	28	2
1588700	105	551900	Kawaroa	3301	New Plymouth City Ward	33	New Plymouth District	07	Taranaki Region	2.60168e+06	6.23773e+06	1	1588700	7	1012	37	2
1588300	75	551900	Kawaroa	3301	New Plymouth City Ward	33	New Plymouth District	07	Taranaki Region	2.60205e+06	6.23812e+06	1	1588300	8	1037	34	3
2899100	69	603000	High St-Stuart St	7103	Cargill Ward	71	Dunedin City	14	Otago Region	2.31583e+06	5.47856e+06	1	2899100	5	964	24	2
2900000	66	603000	High St-Stuart St	7103	Cargill Ward	71	Dunedin City	14	Otago Region	2.31596e+06	5.47851e+06	1	2900000	7	1026	23	2
672400	126	522400	Puhinui	802	Papatoetoe Ward	8	Manukau City	02	Auckland Region	2.67614e+06	6.46671e+06	1	672400	5	971	44	2
2376300	144	584303	Motueka East	5104	Motueka Ward	51	Tasman District	16	Tasman Region	2.51112e+06	6.01161e+06	1	2376300	7	1014	50	2
2636900	252	594900	Barrington South	6006	Spreydon-Heathcote Ward	60	Christchurch City	13	Canterbury Region	2.47933e+06	5.73832e+06	1	2636900	5	955	88	2
410000	168	515420	Grey Lynn East	701	Western Bays Ward	7	Auckland City	02	Auckland Region	2.66609e+06	6.48059e+06	1	410000	5	971	59	2
2899700	48	603000	High St-Stuart St	7103	Cargill Ward	71	Dunedin City	14	Otago Region	2.3162e+06	5.47838e+06	1	2899700	7	1026	17	2
2899300	102	603000	High St-Stuart St	7103	Cargill Ward	71	Dunedin City	14	Otago Region	2.31592e+06	5.47839e+06	1	2899300	7	1009	36	2
2900100	3	603000	High St-Stuart St	7103	Cargill Ward	71	Dunedin City	14	Otago Region	2.31542e+06	5.47876e+06	1	2900100	6	990	1	2
2361900	102	584201	Richmond East	5105	Richmond Ward	51	Tasman District	16	Tasman Region	2.52608e+06	5.98527e+06	1	2361900	7	1002	36	2
1721000	75	556600	Springvale East	3702	Urban Ward	37	Wanganui District	08	Manawatu-Wanganui Region	2.68356e+06	6.14025e+06	1	1721000	6	980	26	2
672200	162	522400	Puhinui	802	Papatoetoe Ward	8	Manukau City	02	Auckland Region	2.67612e+06	6.46693e+06	1	672200	8	1062	73	3
409700	96	515420	Grey Lynn East	701	Western Bays Ward	7	Auckland City	02	Auckland Region	2.66591e+06	6.48048e+06	1	409700	4	941	34	2
541100	237	517702	Sandringham West	703	Eden-Albert Ward	7	Auckland City	02	Auckland Region	2.66466e+06	6.47734e+06	1	541100	6	987	83	2
1497600	105	548000	Mayfair	3005	Hastings Ward	30	Hastings District	06	Hawke's Bay Region	2.84107e+06	6.16682e+06	1	1497600	6	996	37	2
408800	78	515420	Grey Lynn East	701	Western Bays Ward	7	Auckland City	02	Auckland Region	2.6658e+06	6.48118e+06	1	408800	2	906	26	1
1588400	108	551900	Kawaroa	3301	New Plymouth City Ward	33	New Plymouth District	07	Taranaki Region	2.60207e+06	6.23802e+06	1	1588400	8	1057	49	3
2900600	120	603000	High St-Stuart St	7103	Cargill Ward	71	Dunedin City	14	Otago Region	2.31541e+06	5.47838e+06	1	2900600	7	1011	42	2
2899800	42	603000	High St-Stuart St	7103	Cargill Ward	71	Dunedin City	14	Otago Region	2.31629e+06	5.47839e+06	1	2899800	7	1022	15	2
2900400	123	603000	High St-Stuart St	7103	Cargill Ward	71	Dunedin City	14	Otago Region	2.31517e+06	5.47834e+06	1	2900400	6	995	43	2
408900	87	515420	Grey Lynn East	701	Western Bays Ward	7	Auckland City	02	Auckland Region	2.6659e+06	6.48119e+06	1	408900	2	906	29	1
1719700	105	556500	Springvale West	3702	Urban Ward	37	Wanganui District	08	Manawatu-Wanganui Region	2.68296e+06	6.13999e+06	1	1719700	5	955	37	2
409500	96	515420	Grey Lynn East	701	Western Bays Ward	7	Auckland City	02	Auckland Region	2.66588e+06	6.4807e+06	1	409500	4	937	34	2
671400	132	522400	Puhinui	802	Papatoetoe Ward	8	Manukau City	02	Auckland Region	2.67699e+06	6.46734e+06	1	671400	4	945	46	2
1589700	180	551900	Kawaroa	3301	New Plymouth City Ward	33	New Plymouth District	07	Taranaki Region	2.60179e+06	6.23735e+06	1	1589700	1	896	59	1
1589300	78	551900	Kawaroa	3301	New Plymouth City Ward	33	New Plymouth District	07	Taranaki Region	2.60219e+06	6.23754e+06	1	1589300	8	1037	35	3
1588500	96	551900	Kawaroa	3301	New Plymouth City Ward	33	New Plymouth District	07	Taranaki Region	2.60212e+06	6.23794e+06	1	1588500	9	1123	43	3
2637200	207	594900	Barrington South	6006	Spreydon-Heathcote Ward	60	Christchurch City	13	Canterbury Region	2.47926e+06	5.73814e+06	1	2637200	3	933	68	1
2507101	33	590502	Marshland	6001	Shirley-Papanui Ward	60	Christchurch City	13	Canterbury Region	2.48178e+06	5.74619e+06	1	2507101	5	961	12	2
2507000	42	590502	Marshland	6001	Shirley-Papanui Ward	60	Christchurch City	13	Canterbury Region	2.48215e+06	5.74662e+06	1	2507000	4	942	15	2
409100	72	515420	Grey Lynn East	701	Western Bays Ward	7	Auckland City	02	Auckland Region	2.66611e+06	6.48122e+06	1	409100	2	917	24	1
540900	66	517702	Sandringham West	703	Eden-Albert Ward	7	Auckland City	02	Auckland Region	2.66512e+06	6.4775e+06	1	540900	8	1057	30	3
541200	198	517702	Sandringham West	703	Eden-Albert Ward	7	Auckland City	02	Auckland Region	2.66479e+06	6.47728e+06	1	541200	4	952	69	2
540800	207	517702	Sandringham West	703	Eden-Albert Ward	7	Auckland City	02	Auckland Region	2.66494e+06	6.47758e+06	1	540800	8	1037	93	3
1589600	81	551900	Kawaroa	3301	New Plymouth City Ward	33	New Plymouth District	07	Taranaki Region	2.60193e+06	6.23723e+06	1	1589600	8	1055	36	3
1589500	39	551900	Kawaroa	3301	New Plymouth City Ward	33	New Plymouth District	07	Taranaki Region	2.60203e+06	6.23737e+06	1	1589500	5	965	14	2
2638100	162	594900	Barrington South	6006	Spreydon-Heathcote Ward	60	Christchurch City	13	Canterbury Region	2.47895e+06	5.73726e+06	1	2638100	2	918	53	1
1588600	126	551900	Kawaroa	3301	New Plymouth City Ward	33	New Plymouth District	07	Taranaki Region	2.60188e+06	6.2378e+06	1	1588600	8	1068	57	3
1589000	63	551900	Kawaroa	3301	New Plymouth City Ward	33	New Plymouth District	07	Taranaki Region	2.60211e+06	6.23778e+06	1	1589000	7	1027	22	2
2507102	153	590502	Marshland	6001	Shirley-Papanui Ward	60	Christchurch City	13	Canterbury Region	2.48203e+06	5.74594e+06	1	2507102	5	961	54	2
2900200	69	603000	High St-Stuart St	7103	Cargill Ward	71	Dunedin City	14	Otago Region	2.31522e+06	5.47853e+06	1	2900200	6	990	24	2
1719900	63	556500	Springvale West	3702	Urban Ward	37	Wanganui District	08	Manawatu-Wanganui Region	2.68309e+06	6.13978e+06	1	1719900	5	955	22	2
409300	87	515420	Grey Lynn East	701	Western Bays Ward	7	Auckland City	02	Auckland Region	2.66572e+06	6.48058e+06	1	409300	4	951	30	2
671500	201	522400	Puhinui	802	Papatoetoe Ward	8	Manukau City	02	Auckland Region	2.67702e+06	6.46711e+06	1	671500	7	1003	70	2
410200	42	515420	Grey Lynn East	701	Western Bays Ward	7	Auckland City	02	Auckland Region	2.66592e+06	6.48105e+06	1	410200	5	959	15	2
2899900	27	603000	High St-Stuart St	7103	Cargill Ward	71	Dunedin City	14	Otago Region	2.31609e+06	5.47847e+06	1	2899900	7	1022	9	2
2900500	90	603000	High St-Stuart St	7103	Cargill Ward	71	Dunedin City	14	Otago Region	2.31545e+06	5.47848e+06	1	2900500	7	1010	31	2
2899200	90	603000	High St-Stuart St	7103	Cargill Ward	71	Dunedin City	14	Otago Region	2.31586e+06	5.47828e+06	1	2899200	7	1026	31	2
2900300	90	603000	High St-Stuart St	7103	Cargill Ward	71	Dunedin City	14	Otago Region	2.31524e+06	5.47844e+06	1	2900300	6	990	31	2
671700	231	524601	Manukau Central	802	Papatoetoe Ward	8	Manukau City	02	Auckland Region	2.67713e+06	6.46701e+06	1	671700	9	1084	104	3
1510100	66	548831	Te Mata	3008	Havelock North Ward	30	Hastings District	06	Hawke's Bay Region	2.84413e+06	6.16352e+06	1	1510100	5	970	23	2
671100	93	522400	Puhinui	802	Papatoetoe Ward	8	Manukau City	02	Auckland Region	2.67719e+06	6.4674e+06	1	671100	8	1065	42	3
541300	129	517702	Sandringham West	703	Eden-Albert Ward	7	Auckland City	02	Auckland Region	2.66502e+06	6.47726e+06	1	541300	6	988	45	2
410300	66	515420	Grey Lynn East	701	Western Bays Ward	7	Auckland City	02	Auckland Region	2.66595e+06	6.48094e+06	1	410300	3	934	22	1
409000	72	515420	Grey Lynn East	701	Western Bays Ward	7	Auckland City	02	Auckland Region	2.666e+06	6.4812e+06	1	409000	3	925	24	1
2121600	108	572900	Thorndon-Tinakori Road	4703	Lambton Ward	47	Wellington City	09	Wellington Region	2.6584e+06	5.99063e+06	1	2121600	5	956	38	2
1589100	36	551900	Kawaroa	3301	New Plymouth City Ward	33	New Plymouth District	07	Taranaki Region	2.60215e+06	6.23762e+06	1	1589100	9	1123	16	3
1589800	60	551900	Kawaroa	3301	New Plymouth City Ward	33	New Plymouth District	07	Taranaki Region	2.60242e+06	6.23763e+06	1	1589800	8	1037	27	3
1588900	72	551900	Kawaroa	3301	New Plymouth City Ward	33	New Plymouth District	07	Taranaki Region	2.60195e+06	6.23766e+06	1	1588900	8	1055	32	3
2637000	120	594900	Barrington South	6006	Spreydon-Heathcote Ward	60	Christchurch City	13	Canterbury Region	2.47901e+06	5.73805e+06	1	2637000	8	1070	54	3
2637100	36	594900	Barrington South	6006	Spreydon-Heathcote Ward	60	Christchurch City	13	Canterbury Region	2.47884e+06	5.73804e+06	1	2637100	8	1070	16	3
410100	87	515420	Grey Lynn East	701	Western Bays Ward	7	Auckland City	02	Auckland Region	2.66581e+06	6.48103e+06	1	410100	5	959	30	2
1589200	132	551900	Kawaroa	3301	New Plymouth City Ward	33	New Plymouth District	07	Taranaki Region	2.602e+06	6.23754e+06	1	1589200	7	1009	46	2
1589900	57	551900	Kawaroa	3301	New Plymouth City Ward	33	New Plymouth District	07	Taranaki Region	2.60245e+06	6.23754e+06	1	1589900	7	1008	20	2
2899400	24	603000	High St-Stuart St	7103	Cargill Ward	71	Dunedin City	14	Otago Region	2.31565e+06	5.47824e+06	1	2899400	8	1032	11	3
2900700	144	603000	High St-Stuart St	7103	Cargill Ward	71	Dunedin City	14	Otago Region	2.31537e+06	5.47827e+06	1	2900700	8	1032	65	3
408700	198	515420	Grey Lynn East	701	Western Bays Ward	7	Auckland City	02	Auckland Region	2.6657e+06	6.48117e+06	1	408700	3	925	65	1
2899600	39	603000	High St-Stuart St	7103	Cargill Ward	71	Dunedin City	14	Otago Region	2.31601e+06	5.47827e+06	1	2899600	7	1022	14	2
2638500	294	590300	Middleton	6006	Spreydon-Heathcote Ward	60	Christchurch City	13	Canterbury Region	2.47816e+06	5.7401e+06	1	2638500	7	1003	103	2
1719800	117	556500	Springvale West	3702	Urban Ward	37	Wanganui District	08	Manawatu-Wanganui Region	2.68287e+06	6.13994e+06	1	1719800	6	978	41	2
1720803	24	556600	Springvale East	3702	Urban Ward	37	Wanganui District	08	Manawatu-Wanganui Region	2.68352e+06	6.14081e+06	1	1720803	1	895	8	1
2376400	144	584303	Motueka East	5104	Motueka Ward	51	Tasman District	16	Tasman Region	2.51103e+06	6.01121e+06	1	2376400	7	1001	50	2
672300	117	522400	Puhinui	802	Papatoetoe Ward	8	Manukau City	02	Auckland Region	2.67602e+06	6.46686e+06	1	672300	7	1005	41	2
670903	39	522302	Papatoetoe East	802	Papatoetoe Ward	8	Manukau City	02	Auckland Region	2.67782e+06	6.46735e+06	1	670903	10	1263	18	3
671200	81	522400	Puhinui	802	Papatoetoe Ward	8	Manukau City	02	Auckland Region	2.67734e+06	6.46726e+06	1	671200	8	1065	36	3
15700	75	500301	Kaitaia West	101	Northern Ward	1	Far North District	01	Northland Region	2.53456e+06	6.67669e+06	1	15700	10	1161	34	3
15600	171	500301	Kaitaia West	101	Northern Ward	1	Far North District	01	Northland Region	2.53421e+06	6.67661e+06	1	15600	10	1315	77	3
16000	51	500301	Kaitaia West	101	Northern Ward	1	Far North District	01	Northland Region	2.53454e+06	6.67652e+06	1	16000	10	1161	23	3
16100	6	500301	Kaitaia West	101	Northern Ward	1	Far North District	01	Northland Region	2.53471e+06	6.67653e+06	1	16100	9	1106	3	3
15900	84	500301	Kaitaia West	101	Northern Ward	1	Far North District	01	Northland Region	2.53427e+06	6.67648e+06	1	15900	10	1230	38	3
16500	3	500301	Kaitaia West	101	Northern Ward	1	Far North District	01	Northland Region	2.53484e+06	6.67635e+06	1	16500	9	1106	1	3
16300	132	500301	Kaitaia West	101	Northern Ward	1	Far North District	01	Northland Region	2.5345e+06	6.67628e+06	1	16300	8	1051	59	3
16200	90	500301	Kaitaia West	101	Northern Ward	1	Far North District	01	Northland Region	2.53431e+06	6.67624e+06	1	16200	9	1135	40	3
15800	117	500301	Kaitaia West	101	Northern Ward	1	Far North District	01	Northland Region	2.53408e+06	6.67632e+06	1	15800	10	1230	53	3
16400	15	500301	Kaitaia West	101	Northern Ward	1	Far North District	01	Northland Region	2.53477e+06	6.67629e+06	1	16400	8	1051	7	3
16600	90	500301	Kaitaia West	101	Northern Ward	1	Far North District	01	Northland Region	2.5344e+06	6.67613e+06	1	16600	9	1135	40	3
16700	111	500301	Kaitaia West	101	Northern Ward	1	Far North District	01	Northland Region	2.53446e+06	6.67596e+06	1	16700	10	1333	50	3
16800	51	500301	Kaitaia West	101	Northern Ward	1	Far North District	01	Northland Region	2.53455e+06	6.67592e+06	1	16800	10	1333	23	3
15401	18	500301	Kaitaia West	101	Northern Ward	1	Far North District	01	Northland Region	2.53559e+06	6.6756e+06	1	15401	9	1125	8	3
15402	276	500301	Kaitaia West	101	Northern Ward	1	Far North District	01	Northland Region	2.53549e+06	6.67555e+06	1	15402	9	1125	124	3
409200	21	515420	Grey Lynn East	701	Western Bays Ward	7	Auckland City	02	Auckland Region	2.66623e+06	6.48119e+06	1	409200	3	925	7	1
1589400	123	551900	Kawaroa	3301	New Plymouth City Ward	33	New Plymouth District	07	Taranaki Region	2.60225e+06	6.23743e+06	1	1589400	5	965	43	2
409600	84	515420	Grey Lynn East	701	Western Bays Ward	7	Auckland City	02	Auckland Region	2.66596e+06	6.48076e+06	1	409600	5	971	29	2
409800	66	515420	Grey Lynn East	701	Western Bays Ward	7	Auckland City	02	Auckland Region	2.66597e+06	6.48058e+06	1	409800	4	951	23	2
2507200	513	590502	Marshland	6001	Shirley-Papanui Ward	60	Christchurch City	13	Canterbury Region	2.48225e+06	5.74606e+06	1	2507200	3	934	169	1
2899500	24	603000	High St-Stuart St	7103	Cargill Ward	71	Dunedin City	14	Otago Region	2.31579e+06	5.47814e+06	1	2899500	7	1022	8	2
543900	141	518101	Mt Eden North	703	Eden-Albert Ward	7	Auckland City	02	Auckland Region	2.66708e+06	6.4796e+06	1	543900	2	905	47	1
2903600	15	603100	Stuart St-Frederick St	7103	Cargill Ward	71	Dunedin City	14	Otago Region	2.31577e+06	5.47872e+06	1	2903600	8	1032	7	3
2510202	246	588101	Redwood North	6001	Shirley-Papanui Ward	60	Christchurch City	13	Canterbury Region	2.47997e+06	5.74825e+06	1	2510202	4	952	86	2
2509902	282	588101	Redwood North	6001	Shirley-Papanui Ward	60	Christchurch City	13	Canterbury Region	2.47952e+06	5.74822e+06	1	2509902	3	932	93	1
2509901	210	588101	Redwood North	6001	Shirley-Papanui Ward	60	Christchurch City	13	Canterbury Region	2.47915e+06	5.74826e+06	1	2509901	4	950	74	2
2903700	27	603100	Stuart St-Frederick St	7103	Cargill Ward	71	Dunedin City	14	Otago Region	2.31629e+06	5.47913e+06	1	2903700	9	1128	12	3
1723600	108	556300	Gonville East	3702	Urban Ward	37	Wanganui District	08	Manawatu-Wanganui Region	2.68337e+06	6.13912e+06	1	1723600	10	1218	49	3
1723200	84	556300	Gonville East	3702	Urban Ward	37	Wanganui District	08	Manawatu-Wanganui Region	2.68309e+06	6.13925e+06	1	1723200	9	1130	38	3
2771800	66	598202	Otipua Creek-Washdyke Flat	6404	Timaru Ward	64	Timaru District	13	Canterbury Region	2.36968e+06	5.6503e+06	1	2771800	4	945	23	2
543800	186	518101	Mt Eden North	703	Eden-Albert Ward	7	Auckland City	02	Auckland Region	2.66728e+06	6.47967e+06	1	543800	5	974	65	2
674700	72	524601	Manukau Central	802	Papatoetoe Ward	8	Manukau City	02	Auckland Region	2.67623e+06	6.46624e+06	1	674700	8	1033	32	3
412402	12	514200	Newton	704	Hobson Ward	7	Auckland City	02	Auckland Region	2.66728e+06	6.48061e+06	1	412402	6	984	4	2
544500	60	518101	Mt Eden North	703	Eden-Albert Ward	7	Auckland City	02	Auckland Region	2.66677e+06	6.47978e+06	1	544500	6	979	21	2
544302	24	518101	Mt Eden North	703	Eden-Albert Ward	7	Auckland City	02	Auckland Region	2.66677e+06	6.47985e+06	1	544302	4	948	8	2
412500	72	514200	Newton	704	Hobson Ward	7	Auckland City	02	Auckland Region	2.66729e+06	6.48069e+06	1	412500	6	984	25	2
410700	120	515420	Grey Lynn East	701	Western Bays Ward	7	Auckland City	02	Auckland Region	2.66618e+06	6.48065e+06	1	410700	1	895	40	1
1460400	228	547300	Taradale South	3199	Area Outside Ward	31	Napier City	06	Hawke's Bay Region	2.84143e+06	6.17778e+06	1	1460400	2	907	75	1
1590400	111	552002	Marsland Hill	3301	New Plymouth City Ward	33	New Plymouth District	07	Taranaki Region	2.60298e+06	6.23759e+06	1	1590400	5	970	39	2
1591400	39	551800	New Plymouth Central	3301	New Plymouth City Ward	33	New Plymouth District	07	Taranaki Region	2.60238e+06	6.23771e+06	1	1591400	8	1041	18	3
1592100	6	551800	New Plymouth Central	3301	New Plymouth City Ward	33	New Plymouth District	07	Taranaki Region	2.60289e+06	6.2378e+06	1	1592100	6	999	2	2
2638800	198	594800	Barrington North	6006	Spreydon-Heathcote Ward	60	Christchurch City	13	Canterbury Region	2.47765e+06	5.7394e+06	1	2638800	6	998	69	2
541900	78	517702	Sandringham West	703	Eden-Albert Ward	7	Auckland City	02	Auckland Region	2.66442e+06	6.4778e+06	1	541900	7	1010	27	2
411700	27	514200	Newton	701	Western Bays Ward	7	Auckland City	02	Auckland Region	2.66676e+06	6.48091e+06	1	411700	6	990	9	2
410900	54	515420	Grey Lynn East	701	Western Bays Ward	7	Auckland City	02	Auckland Region	2.66615e+06	6.48108e+06	1	410900	3	929	18	1
2508900	135	588101	Redwood North	6001	Shirley-Papanui Ward	60	Christchurch City	13	Canterbury Region	2.47972e+06	5.74768e+06	1	2508900	6	977	47	2
2056604	36	571500	Papakowhai	4403	Eastern Ward	44	Porirua City	09	Wellington Region	2.66502e+06	6.00605e+06	1	2056604	6	980	13	2
2901600	45	603100	Stuart St-Frederick St	7103	Cargill Ward	71	Dunedin City	14	Otago Region	2.31652e+06	5.47859e+06	1	2901600	9	1128	20	3
541500	159	517702	Sandringham West	703	Eden-Albert Ward	7	Auckland City	02	Auckland Region	2.66485e+06	6.477e+06	1	541500	4	947	56	2
410500	114	515420	Grey Lynn East	701	Western Bays Ward	7	Auckland City	02	Auckland Region	2.66604e+06	6.48082e+06	1	410500	5	958	40	2
410600	108	515420	Grey Lynn East	701	Western Bays Ward	7	Auckland City	02	Auckland Region	2.66612e+06	6.48088e+06	1	410600	3	934	36	1
1590500	90	551800	New Plymouth Central	3301	New Plymouth City Ward	33	New Plymouth District	07	Taranaki Region	2.60229e+06	6.23814e+06	1	1590500	6	991	31	2
2508702	21	588102	Redwood South	6001	Shirley-Papanui Ward	60	Christchurch City	13	Canterbury Region	2.4791e+06	5.74582e+06	1	2508702	2	901	7	1
2508200	27	588102	Redwood South	6001	Shirley-Papanui Ward	60	Christchurch City	13	Canterbury Region	2.479e+06	5.74701e+06	1	2508200	9	1126	12	3
2508301	162	588102	Redwood South	6001	Shirley-Papanui Ward	60	Christchurch City	13	Canterbury Region	2.47972e+06	5.74695e+06	1	2508301	2	900	53	1
2508600	177	588102	Redwood South	6001	Shirley-Papanui Ward	60	Christchurch City	13	Canterbury Region	2.47949e+06	5.74644e+06	1	2508600	6	985	62	2
2638900	165	594800	Barrington North	6006	Spreydon-Heathcote Ward	60	Christchurch City	13	Canterbury Region	2.4778e+06	5.73937e+06	1	2638900	8	1053	74	3
410800	132	515420	Grey Lynn East	701	Western Bays Ward	7	Auckland City	02	Auckland Region	2.66624e+06	6.48073e+06	1	410800	2	914	44	1
2509100	189	588102	Redwood South	6001	Shirley-Papanui Ward	60	Christchurch City	13	Canterbury Region	2.47967e+06	5.74744e+06	1	2509100	3	932	62	1
2509001	180	588102	Redwood South	6001	Shirley-Papanui Ward	60	Christchurch City	13	Canterbury Region	2.47924e+06	5.74754e+06	1	2509001	6	995	63	2
2900800	63	603000	High St-Stuart St	7103	Cargill Ward	71	Dunedin City	14	Otago Region	2.31562e+06	5.47841e+06	1	2900800	7	1010	22	2
1722800	102	556300	Gonville East	3702	Urban Ward	37	Wanganui District	08	Manawatu-Wanganui Region	2.6831e+06	6.13955e+06	1	1722800	4	946	36	2
411900	57	514200	Newton	701	Western Bays Ward	7	Auckland City	02	Auckland Region	2.66686e+06	6.481e+06	1	411900	6	990	20	2
674100	126	524601	Manukau Central	802	Papatoetoe Ward	8	Manukau City	02	Auckland Region	2.67591e+06	6.46601e+06	1	674100	10	1203	57	3
2377000	51	584301	Motueka West	5104	Motueka Ward	51	Tasman District	16	Tasman Region	2.51089e+06	6.01142e+06	1	2377000	7	1024	18	2
411500	45	515420	Grey Lynn East	701	Western Bays Ward	7	Auckland City	02	Auckland Region	2.66648e+06	6.48091e+06	1	411500	3	922	15	1
1590800	75	551800	New Plymouth Central	3301	New Plymouth City Ward	33	New Plymouth District	07	Taranaki Region	2.60251e+06	6.23808e+06	1	1590800	9	1077	34	3
2901100	3	603100	Stuart St-Frederick St	7103	Cargill Ward	71	Dunedin City	14	Otago Region	2.31634e+06	5.47884e+06	1	2901100	9	1128	1	3
2507607	93	588102	Redwood South	6001	Shirley-Papanui Ward	60	Christchurch City	13	Canterbury Region	2.47997e+06	5.74783e+06	1	2507607	2	901	31	1
2901400	6	603100	Stuart St-Frederick St	7103	Cargill Ward	71	Dunedin City	14	Otago Region	2.31649e+06	5.47888e+06	1	2901400	9	1128	3	3
1722400	45	556700	Wanganui Collegiate	3702	Urban Ward	37	Wanganui District	08	Manawatu-Wanganui Region	2.68405e+06	6.1394e+06	1	1722400	7	1013	16	2
542700	519	518101	Mt Eden North	703	Eden-Albert Ward	7	Auckland City	02	Auckland Region	2.66768e+06	6.48e+06	1	542700	7	1020	182	2
2377100	213	584301	Motueka West	5104	Motueka Ward	51	Tasman District	16	Tasman Region	2.51017e+06	6.01122e+06	1	2377100	6	989	75	2
2377400	60	584301	Motueka West	5104	Motueka Ward	51	Tasman District	16	Tasman Region	2.51059e+06	6.01103e+06	1	2377400	8	1058	27	3
542300	195	517702	Sandringham West	703	Eden-Albert Ward	7	Auckland City	02	Auckland Region	2.66435e+06	6.47733e+06	1	542300	8	1036	88	3
411200	114	515420	Grey Lynn East	701	Western Bays Ward	7	Auckland City	02	Auckland Region	2.6662e+06	6.48094e+06	1	411200	2	915	38	1
2122000	18	572900	Thorndon-Tinakori Road	4703	Lambton Ward	47	Wellington City	09	Wellington Region	2.65847e+06	5.99037e+06	1	2122000	4	947	6	2
1591100	6	551800	New Plymouth Central	3301	New Plymouth City Ward	33	New Plymouth District	07	Taranaki Region	2.60245e+06	6.23791e+06	1	1591100	8	1041	3	3
2508802	24	591900	Papanui	6001	Shirley-Papanui Ward	60	Christchurch City	13	Canterbury Region	2.47929e+06	5.74536e+06	1	2508802	2	901	8	1
2507507	18	588102	Redwood South	6001	Shirley-Papanui Ward	60	Christchurch City	13	Canterbury Region	2.4798e+06	5.74663e+06	1	2507507	4	946	6	2
2508500	234	588102	Redwood South	6001	Shirley-Papanui Ward	60	Christchurch City	13	Canterbury Region	2.47932e+06	5.7467e+06	1	2508500	3	924	77	1
2508302	276	588102	Redwood South	6001	Shirley-Papanui Ward	60	Christchurch City	13	Canterbury Region	2.47961e+06	5.74668e+06	1	2508302	3	927	91	1
2507608	90	588102	Redwood South	6001	Shirley-Papanui Ward	60	Christchurch City	13	Canterbury Region	2.47994e+06	5.7466e+06	1	2507608	2	914	30	1
2639000	186	594800	Barrington North	6006	Spreydon-Heathcote Ward	60	Christchurch City	13	Canterbury Region	2.47745e+06	5.73922e+06	1	2639000	9	1105	84	3
2507606	57	588102	Redwood South	6001	Shirley-Papanui Ward	60	Christchurch City	13	Canterbury Region	2.47992e+06	5.74715e+06	1	2507606	7	1027	20	2
2508000	189	588102	Redwood South	6001	Shirley-Papanui Ward	60	Christchurch City	13	Canterbury Region	2.4792e+06	5.74728e+06	1	2508000	9	1073	85	3
2901800	138	603100	Stuart St-Frederick St	7103	Cargill Ward	71	Dunedin City	14	Otago Region	2.31668e+06	5.47877e+06	1	2901800	10	1159	62	3
1722100	93	556700	Wanganui Collegiate	3702	Urban Ward	37	Wanganui District	08	Manawatu-Wanganui Region	2.68363e+06	6.13923e+06	1	1722100	8	1056	42	3
542502	270	518101	Mt Eden North	703	Eden-Albert Ward	7	Auckland City	02	Auckland Region	2.66717e+06	6.47992e+06	1	542502	5	971	94	2
542600	135	518101	Mt Eden North	703	Eden-Albert Ward	7	Auckland City	02	Auckland Region	2.66753e+06	6.48003e+06	1	542600	4	950	47	2
542800	285	518101	Mt Eden North	703	Eden-Albert Ward	7	Auckland City	02	Auckland Region	2.6674e+06	6.47985e+06	1	542800	6	981	100	2
1590900	63	551800	New Plymouth Central	3301	New Plymouth City Ward	33	New Plymouth District	07	Taranaki Region	2.60224e+06	6.23783e+06	1	1590900	8	1041	28	3
1591500	3	551800	New Plymouth Central	3301	New Plymouth City Ward	33	New Plymouth District	07	Taranaki Region	2.60266e+06	6.23783e+06	1	1591500	6	999	1	2
2508801	384	588102	Redwood South	6001	Shirley-Papanui Ward	60	Christchurch City	13	Canterbury Region	2.47905e+06	5.74564e+06	1	2508801	2	901	127	1
411600	12	515420	Grey Lynn East	701	Western Bays Ward	7	Auckland City	02	Auckland Region	2.66657e+06	6.48096e+06	1	411600	3	922	4	1
2508104	153	588102	Redwood South	6001	Shirley-Papanui Ward	60	Christchurch City	13	Canterbury Region	2.4796e+06	5.74717e+06	1	2508104	1	892	50	1
2508103	90	588102	Redwood South	6001	Shirley-Papanui Ward	60	Christchurch City	13	Canterbury Region	2.47917e+06	5.74718e+06	1	2508103	9	1126	40	3
2507502	30	588102	Redwood South	6001	Shirley-Papanui Ward	60	Christchurch City	13	Canterbury Region	2.47988e+06	5.74777e+06	1	2507502	4	946	10	2
2508101	90	588102	Redwood South	6001	Shirley-Papanui Ward	60	Christchurch City	13	Canterbury Region	2.47964e+06	5.74728e+06	1	2508101	1	886	30	1
2902400	246	603100	Stuart St-Frederick St	7103	Cargill Ward	71	Dunedin City	14	Otago Region	2.31598e+06	5.47903e+06	1	2902400	9	1092	111	3
2901200	51	603100	Stuart St-Frederick St	7103	Cargill Ward	71	Dunedin City	14	Otago Region	2.31645e+06	5.47907e+06	1	2901200	9	1128	23	3
2901300	546	603100	Stuart St-Frederick St	7103	Cargill Ward	71	Dunedin City	14	Otago Region	2.31656e+06	5.47905e+06	1	2901300	9	1128	246	3
1722200	66	556700	Wanganui Collegiate	3702	Urban Ward	37	Wanganui District	08	Manawatu-Wanganui Region	2.68372e+06	6.13908e+06	1	1722200	9	1099	30	3
1722700	111	556700	Wanganui Collegiate	3702	Urban Ward	37	Wanganui District	08	Manawatu-Wanganui Region	2.68398e+06	6.13901e+06	1	1722700	9	1099	50	3
1721500	144	556700	Wanganui Collegiate	3702	Urban Ward	37	Wanganui District	08	Manawatu-Wanganui Region	2.6843e+06	6.13961e+06	1	1721500	1	870	48	1
1722000	15	556700	Wanganui Collegiate	3702	Urban Ward	37	Wanganui District	08	Manawatu-Wanganui Region	2.68372e+06	6.13976e+06	1	1722000	8	1056	7	3
542100	159	517702	Sandringham West	703	Eden-Albert Ward	7	Auckland City	02	Auckland Region	2.66449e+06	6.47751e+06	1	542100	8	1031	72	3
543100	96	518101	Mt Eden North	703	Eden-Albert Ward	7	Auckland City	02	Auckland Region	2.6674e+06	6.47959e+06	1	543100	3	934	32	1
674000	84	524601	Manukau Central	802	Papatoetoe Ward	8	Manukau City	02	Auckland Region	2.67617e+06	6.46618e+06	1	674000	8	1057	38	3
673800	120	524601	Manukau Central	802	Papatoetoe Ward	8	Manukau City	02	Auckland Region	2.67592e+06	6.46617e+06	1	673800	8	1041	54	3
2376702	72	584303	Motueka East	5104	Motueka Ward	51	Tasman District	16	Tasman Region	2.51129e+06	6.01094e+06	1	2376702	8	1053	32	3
2376600	141	584303	Motueka East	5104	Motueka Ward	51	Tasman District	16	Tasman Region	2.51104e+06	6.01087e+06	1	2376600	10	1232	63	3
2377600	96	584301	Motueka West	5104	Motueka Ward	51	Tasman District	16	Tasman Region	2.51009e+06	6.01082e+06	1	2377600	8	1062	43	3
541600	63	517702	Sandringham West	703	Eden-Albert Ward	7	Auckland City	02	Auckland Region	2.66508e+06	6.47736e+06	1	541600	8	1057	28	3
542000	264	517702	Sandringham West	703	Eden-Albert Ward	7	Auckland City	02	Auckland Region	2.66464e+06	6.47771e+06	1	542000	7	999	92	2
2507803	6	590502	Marshland	6001	Shirley-Papanui Ward	60	Christchurch City	13	Canterbury Region	2.47994e+06	5.74554e+06	1	2507803	4	946	2	2
2507605	120	588102	Redwood South	6001	Shirley-Papanui Ward	60	Christchurch City	13	Canterbury Region	2.47995e+06	5.74759e+06	1	2507605	7	1027	42	2
2507503	57	588102	Redwood South	6001	Shirley-Papanui Ward	60	Christchurch City	13	Canterbury Region	2.47984e+06	5.74746e+06	1	2507503	7	1008	20	2
2638701	210	594800	Barrington North	6006	Spreydon-Heathcote Ward	60	Christchurch City	13	Canterbury Region	2.47794e+06	5.73962e+06	1	2638701	7	1010	74	2
2507501	45	588102	Redwood South	6001	Shirley-Papanui Ward	60	Christchurch City	13	Canterbury Region	2.47989e+06	5.74796e+06	1	2507501	7	1008	16	2
2902100	141	603100	Stuart St-Frederick St	7103	Cargill Ward	71	Dunedin City	14	Otago Region	2.31669e+06	5.479e+06	1	2902100	9	1089	63	3
2902200	126	603100	Stuart St-Frederick St	7103	Cargill Ward	71	Dunedin City	14	Otago Region	2.31663e+06	5.47902e+06	1	2902200	9	1102	57	3
2515204	75	588401	Belfast South	6001	Shirley-Papanui Ward	60	Christchurch City	13	Canterbury Region	2.47937e+06	5.74999e+06	1	2515204	3	928	25	1
2902000	78	603100	Stuart St-Frederick St	7103	Cargill Ward	71	Dunedin City	14	Otago Region	2.31677e+06	5.479e+06	1	2902000	9	1109	35	3
673900	108	524601	Manukau Central	802	Papatoetoe Ward	8	Manukau City	02	Auckland Region	2.67606e+06	6.46607e+06	1	673900	8	1057	49	3
2376701	87	584303	Motueka East	5104	Motueka Ward	51	Tasman District	16	Tasman Region	2.51126e+06	6.0108e+06	1	2376701	8	1053	39	3
2377700	231	584301	Motueka West	5104	Motueka Ward	51	Tasman District	16	Tasman Region	2.51053e+06	6.01085e+06	1	2377700	8	1054	104	3
411000	15	515420	Grey Lynn East	701	Western Bays Ward	7	Auckland City	02	Auckland Region	2.66641e+06	6.48111e+06	1	411000	2	915	5	1
411800	87	514200	Newton	701	Western Bays Ward	7	Auckland City	02	Auckland Region	2.6668e+06	6.48082e+06	1	411800	7	1007	30	2
1590300	87	552002	Marsland Hill	3301	New Plymouth City Ward	33	New Plymouth District	07	Taranaki Region	2.60272e+06	6.23764e+06	1	1590300	8	1035	39	3
1591700	18	551800	New Plymouth Central	3301	New Plymouth City Ward	33	New Plymouth District	07	Taranaki Region	2.6027e+06	6.23807e+06	1	1591700	6	999	6	2
2507900	117	590502	Marshland	6001	Shirley-Papanui Ward	60	Christchurch City	13	Canterbury Region	2.48121e+06	5.74615e+06	1	2507900	2	903	39	1
2507801	33	590502	Marshland	6001	Shirley-Papanui Ward	60	Christchurch City	13	Canterbury Region	2.48033e+06	5.74618e+06	1	2507801	4	946	12	2
2507609	132	588102	Redwood South	6001	Shirley-Papanui Ward	60	Christchurch City	13	Canterbury Region	2.47991e+06	5.74697e+06	1	2507609	2	914	44	1
2507506	39	588102	Redwood South	6001	Shirley-Papanui Ward	60	Christchurch City	13	Canterbury Region	2.47982e+06	5.74693e+06	1	2507506	4	946	14	2
2509002	60	588102	Redwood South	6001	Shirley-Papanui Ward	60	Christchurch City	13	Canterbury Region	2.47934e+06	5.74748e+06	1	2509002	1	886	20	1
542501	9	518101	Mt Eden North	704	Hobson Ward	7	Auckland City	02	Auckland Region	2.66741e+06	6.48011e+06	1	542501	5	971	3	2
2377800	81	584303	Motueka East	5104	Motueka Ward	51	Tasman District	16	Tasman Region	2.511e+06	6.01055e+06	1	2377800	10	1146	36	3
673401	48	524601	Manukau Central	802	Papatoetoe Ward	8	Manukau City	02	Auckland Region	2.67611e+06	6.46652e+06	1	673401	8	1057	22	3
673402	102	524601	Manukau Central	802	Papatoetoe Ward	8	Manukau City	02	Auckland Region	2.67606e+06	6.46646e+06	1	673402	8	1057	46	3
412100	36	514200	Newton	704	Hobson Ward	7	Auckland City	02	Auckland Region	2.66719e+06	6.48111e+06	1	412100	6	990	13	2
542900	300	518101	Mt Eden North	703	Eden-Albert Ward	7	Auckland City	02	Auckland Region	2.66754e+06	6.47971e+06	1	542900	7	1020	105	2
410400	78	515420	Grey Lynn East	701	Western Bays Ward	7	Auckland City	02	Auckland Region	2.66602e+06	6.48103e+06	1	410400	3	929	26	1
1590200	78	552002	Marsland Hill	3301	New Plymouth City Ward	33	New Plymouth District	07	Taranaki Region	2.60276e+06	6.23754e+06	1	1590200	7	1006	27	2
1591200	3	551800	New Plymouth Central	3301	New Plymouth City Ward	33	New Plymouth District	07	Taranaki Region	2.60256e+06	6.23799e+06	1	1591200	8	1041	1	3
1590700	48	551800	New Plymouth Central	3301	New Plymouth City Ward	33	New Plymouth District	07	Taranaki Region	2.60234e+06	6.23802e+06	1	1590700	6	999	17	2
412000	72	514200	Newton	704	Hobson Ward	7	Auckland City	02	Auckland Region	2.6671e+06	6.48108e+06	1	412000	7	1007	25	2
2508400	102	588102	Redwood South	6001	Shirley-Papanui Ward	60	Christchurch City	13	Canterbury Region	2.47905e+06	5.74675e+06	1	2508400	5	958	36	2
2638600	186	594800	Barrington North	6006	Spreydon-Heathcote Ward	60	Christchurch City	13	Canterbury Region	2.47821e+06	5.73977e+06	1	2638600	5	963	65	2
2638702	111	594800	Barrington North	6006	Spreydon-Heathcote Ward	60	Christchurch City	13	Canterbury Region	2.47806e+06	5.73959e+06	1	2638702	6	994	39	2
2639700	129	594800	Barrington North	6006	Spreydon-Heathcote Ward	60	Christchurch City	13	Canterbury Region	2.47839e+06	5.73956e+06	1	2639700	5	962	45	2
2509202	114	588102	Redwood South	6001	Shirley-Papanui Ward	60	Christchurch City	13	Canterbury Region	2.47921e+06	5.74739e+06	1	2509202	4	936	40	2
2509201	75	588102	Redwood South	6001	Shirley-Papanui Ward	60	Christchurch City	13	Canterbury Region	2.47935e+06	5.74741e+06	1	2509201	5	968	26	2
2900900	75	603000	High St-Stuart St	7103	Cargill Ward	71	Dunedin City	14	Otago Region	2.3156e+06	5.4783e+06	1	2900900	7	1010	26	2
1721800	81	556700	Wanganui Collegiate	3702	Urban Ward	37	Wanganui District	08	Manawatu-Wanganui Region	2.68447e+06	6.13928e+06	1	1721800	4	952	28	2
1721700	81	556700	Wanganui Collegiate	3702	Urban Ward	37	Wanganui District	08	Manawatu-Wanganui Region	2.68431e+06	6.13934e+06	1	1721700	2	902	27	1
1721400	60	556700	Wanganui Collegiate	3702	Urban Ward	37	Wanganui District	08	Manawatu-Wanganui Region	2.68388e+06	6.13988e+06	1	1721400	2	902	20	1
1721900	21	556700	Wanganui Collegiate	3702	Urban Ward	37	Wanganui District	08	Manawatu-Wanganui Region	2.68357e+06	6.14002e+06	1	1721900	8	1056	9	3
411100	36	515420	Grey Lynn East	701	Western Bays Ward	7	Auckland City	02	Auckland Region	2.66628e+06	6.481e+06	1	411100	2	915	12	1
1721200	135	556700	Wanganui Collegiate	3702	Urban Ward	37	Wanganui District	08	Manawatu-Wanganui Region	2.68373e+06	6.14005e+06	1	1721200	9	1091	61	3
2377500	105	584301	Motueka West	5104	Motueka Ward	51	Tasman District	16	Tasman Region	2.51086e+06	6.01112e+06	1	2377500	8	1058	47	3
1466708	234	548833	Te Mata Hills	3008	Havelock North Ward	30	Hastings District	06	Hawke's Bay Region	2.84479e+06	6.16309e+06	1	1466708	1	884	77	1
543000	48	518101	Mt Eden North	703	Eden-Albert Ward	7	Auckland City	02	Auckland Region	2.66784e+06	6.47972e+06	1	543000	7	1020	17	2
541800	144	517702	Sandringham West	703	Eden-Albert Ward	7	Auckland City	02	Auckland Region	2.66466e+06	6.47787e+06	1	541800	7	1010	50	2
542200	159	517702	Sandringham West	703	Eden-Albert Ward	7	Auckland City	02	Auckland Region	2.66457e+06	6.47741e+06	1	542200	3	922	52	1
1590000	66	551900	Kawaroa	3301	New Plymouth City Ward	33	New Plymouth District	07	Taranaki Region	2.60248e+06	6.23738e+06	1	1590000	7	1008	23	2
411300	75	515420	Grey Lynn East	701	Western Bays Ward	7	Auckland City	02	Auckland Region	2.66632e+06	6.48078e+06	1	411300	3	922	25	1
411400	12	515420	Grey Lynn East	701	Western Bays Ward	7	Auckland City	02	Auckland Region	2.6664e+06	6.48085e+06	1	411400	3	922	4	1
2121900	69	572900	Thorndon-Tinakori Road	4703	Lambton Ward	47	Wellington City	09	Wellington Region	2.6584e+06	5.99032e+06	1	2121900	6	985	24	2
1591000	33	551800	New Plymouth Central	3301	New Plymouth City Ward	33	New Plymouth District	07	Taranaki Region	2.60235e+06	6.23788e+06	1	1591000	8	1041	15	3
2508701	87	588102	Redwood South	6001	Shirley-Papanui Ward	60	Christchurch City	13	Canterbury Region	2.47928e+06	5.74627e+06	1	2508701	6	985	30	2
2904900	165	604020	Roslyn South	7104	Hills Ward	71	Dunedin City	14	Otago Region	2.31462e+06	5.47867e+06	1	2904900	3	928	54	1
2642300	198	594800	Barrington North	6006	Spreydon-Heathcote Ward	60	Christchurch City	13	Canterbury Region	2.47838e+06	5.74001e+06	1	2642300	6	980	69	2
2905202	30	604020	Roslyn South	7104	Hills Ward	71	Dunedin City	14	Otago Region	2.3152e+06	5.47918e+06	1	2905202	3	929	10	1
2905400	141	604020	Roslyn South	7104	Hills Ward	71	Dunedin City	14	Otago Region	2.31492e+06	5.47913e+06	1	2905400	4	943	49	2
2380000	135	584301	Motueka West	5104	Motueka Ward	51	Tasman District	16	Tasman Region	2.51072e+06	6.00875e+06	1	2380000	7	1024	47	2
546200	3	518101	Mt Eden North	703	Eden-Albert Ward	7	Auckland City	02	Auckland Region	2.66771e+06	6.47948e+06	1	546200	5	956	1	2
2642200	63	594800	Barrington North	6006	Spreydon-Heathcote Ward	60	Christchurch City	13	Canterbury Region	2.47877e+06	5.73823e+06	1	2642200	4	948	22	2
2118700	30	572900	Thorndon-Tinakori Road	4703	Lambton Ward	47	Wellington City	09	Wellington Region	2.65911e+06	5.99108e+06	1	2118700	3	931	10	1
1594100	6	551800	New Plymouth Central	3301	New Plymouth City Ward	33	New Plymouth District	07	Taranaki Region	2.60395e+06	6.2383e+06	1	1594100	7	1013	2	2
2641701	165	594800	Barrington North	6006	Spreydon-Heathcote Ward	60	Christchurch City	13	Canterbury Region	2.4787e+06	5.73842e+06	1	2641701	9	1114	74	3
2641900	165	594800	Barrington North	6006	Spreydon-Heathcote Ward	60	Christchurch City	13	Canterbury Region	2.47888e+06	5.73851e+06	1	2641900	6	977	58	2
2118400	39	572900	Thorndon-Tinakori Road	4703	Lambton Ward	47	Wellington City	09	Wellington Region	2.65934e+06	5.99118e+06	1	2118400	3	922	13	1
2511501	120	588300	Casebrook	6001	Shirley-Papanui Ward	60	Christchurch City	13	Canterbury Region	2.47743e+06	5.74714e+06	1	2511501	3	931	40	1
2643500	99	595000	Spreydon	6006	Spreydon-Heathcote Ward	60	Christchurch City	13	Canterbury Region	2.47934e+06	5.73981e+06	1	2643500	7	1004	35	2
1725100	162	556200	Gonville South	3702	Urban Ward	37	Wanganui District	08	Manawatu-Wanganui Region	2.68308e+06	6.1378e+06	1	1725100	9	1087	73	3
2903200	21	603100	Stuart St-Frederick St	7103	Cargill Ward	71	Dunedin City	14	Otago Region	2.31615e+06	5.47859e+06	1	2903200	8	1032	9	3
1724100	90	556200	Gonville South	3702	Urban Ward	37	Wanganui District	08	Manawatu-Wanganui Region	2.68329e+06	6.13854e+06	1	1724100	9	1073	40	3
1724000	117	556200	Gonville South	3702	Urban Ward	37	Wanganui District	08	Manawatu-Wanganui Region	2.68304e+06	6.13852e+06	1	1724000	9	1073	53	3
674500	27	524601	Manukau Central	802	Papatoetoe Ward	8	Manukau City	02	Auckland Region	2.67642e+06	6.46645e+06	1	674500	8	1033	12	3
412200	261	514200	Newton	704	Hobson Ward	7	Auckland City	02	Auckland Region	2.66736e+06	6.48107e+06	1	412200	6	995	91	2
2510500	72	588300	Casebrook	6001	Shirley-Papanui Ward	60	Christchurch City	13	Canterbury Region	2.47772e+06	5.74643e+06	1	2510500	9	1129	32	3
1724200	66	556200	Gonville South	3702	Urban Ward	37	Wanganui District	08	Manawatu-Wanganui Region	2.68322e+06	6.13841e+06	1	1724200	8	1030	30	3
2902900	24	603100	Stuart St-Frederick St	7103	Cargill Ward	71	Dunedin City	14	Otago Region	2.31624e+06	5.47892e+06	1	2902900	9	1128	11	3
2902500	225	603100	Stuart St-Frederick St	7103	Cargill Ward	71	Dunedin City	14	Otago Region	2.31571e+06	5.4789e+06	1	2902500	8	1039	101	3
1723700	102	556300	Gonville East	3702	Urban Ward	37	Wanganui District	08	Manawatu-Wanganui Region	2.68365e+06	6.139e+06	1	1723700	8	1046	46	3
544600	126	518101	Mt Eden North	703	Eden-Albert Ward	7	Auckland City	02	Auckland Region	2.66697e+06	6.47978e+06	1	544600	6	982	44	2
412302	162	514200	Newton	704	Hobson Ward	7	Auckland City	02	Auckland Region	2.6674e+06	6.48065e+06	1	412302	7	1005	57	2
413400	78	514000	Freemans Bay	701	Western Bays Ward	7	Auckland City	02	Auckland Region	2.66687e+06	6.48136e+06	1	413400	4	951	27	2
2378201	144	584303	Motueka East	5104	Motueka Ward	51	Tasman District	16	Tasman Region	2.51095e+06	6.00988e+06	1	2378201	8	1039	65	3
2379300	210	584301	Motueka West	5104	Motueka Ward	51	Tasman District	16	Tasman Region	2.51083e+06	6.00975e+06	1	2379300	9	1085	94	3
674600	60	524601	Manukau Central	802	Papatoetoe Ward	8	Manukau City	02	Auckland Region	2.67629e+06	6.46646e+06	1	674600	9	1097	27	3
544000	162	518101	Mt Eden North	703	Eden-Albert Ward	7	Auckland City	02	Auckland Region	2.66702e+06	6.47951e+06	1	544000	5	970	57	2
1592400	36	551800	New Plymouth Central	3301	New Plymouth City Ward	33	New Plymouth District	07	Taranaki Region	2.60296e+06	6.23804e+06	1	1592400	6	999	13	2
151201	36	507400	Mairangi Bay	501	Northern Ward	5	North Shore City	02	Auckland Region	2.66587e+06	6.49363e+06	1	151201	1	880	12	1
544400	39	518101	Mt Eden North	703	Eden-Albert Ward	7	Auckland City	02	Auckland Region	2.66693e+06	6.47986e+06	1	544400	6	979	14	2
2510000	471	588101	Redwood North	6001	Shirley-Papanui Ward	60	Christchurch City	13	Canterbury Region	2.47966e+06	5.74891e+06	1	2510000	1	898	155	1
2902700	72	603100	Stuart St-Frederick St	7103	Cargill Ward	71	Dunedin City	14	Otago Region	2.31598e+06	5.47892e+06	1	2902700	9	1089	32	3
2509304	54	588101	Redwood North	6001	Shirley-Papanui Ward	60	Christchurch City	13	Canterbury Region	2.47916e+06	5.74787e+06	1	2509304	7	1003	19	2
1722900	81	556300	Gonville East	3702	Urban Ward	37	Wanganui District	08	Manawatu-Wanganui Region	2.68294e+06	6.13942e+06	1	1722900	9	1075	36	3
1723000	114	556300	Gonville East	3702	Urban Ward	37	Wanganui District	08	Manawatu-Wanganui Region	2.68317e+06	6.13939e+06	1	1723000	7	1005	40	2
675000	21	524601	Manukau Central	802	Papatoetoe Ward	8	Manukau City	02	Auckland Region	2.67597e+06	6.46572e+06	1	675000	9	1097	9	3
2378600	108	584301	Motueka West	5104	Motueka Ward	51	Tasman District	16	Tasman Region	2.50938e+06	6.01007e+06	1	2378600	9	1117	49	3
2378700	81	584301	Motueka West	5104	Motueka Ward	51	Tasman District	16	Tasman Region	2.50977e+06	6.01014e+06	1	2378700	8	1034	36	3
413600	63	514000	Freemans Bay	701	Western Bays Ward	7	Auckland City	02	Auckland Region	2.66661e+06	6.48155e+06	1	413600	7	1011	22	2
543200	150	518101	Mt Eden North	703	Eden-Albert Ward	7	Auckland City	02	Auckland Region	2.66738e+06	6.47943e+06	1	543200	8	1044	68	3
1591900	15	551800	New Plymouth Central	3301	New Plymouth City Ward	33	New Plymouth District	07	Taranaki Region	2.60281e+06	6.23797e+06	1	1591900	6	999	5	2
1593000	60	551800	New Plymouth Central	3301	New Plymouth City Ward	33	New Plymouth District	07	Taranaki Region	2.60353e+06	6.23848e+06	1	1593000	6	981	21	2
2641300	180	594800	Barrington North	6006	Spreydon-Heathcote Ward	60	Christchurch City	13	Canterbury Region	2.47903e+06	5.73892e+06	1	2641300	8	1036	81	3
2510400	138	588300	Casebrook	6001	Shirley-Papanui Ward	60	Christchurch City	13	Canterbury Region	2.47775e+06	5.74661e+06	1	2510400	9	1129	62	3
413500	30	514000	Freemans Bay	701	Western Bays Ward	7	Auckland City	02	Auckland Region	2.66661e+06	6.48116e+06	1	413500	2	914	10	1
2509804	234	588101	Redwood North	6001	Shirley-Papanui Ward	60	Christchurch City	13	Canterbury Region	2.47978e+06	5.74836e+06	1	2509804	5	972	82	2
2903100	15	603100	Stuart St-Frederick St	7103	Cargill Ward	71	Dunedin City	14	Otago Region	2.3161e+06	5.4788e+06	1	2903100	8	1032	7	3
2509803	252	588101	Redwood North	6001	Shirley-Papanui Ward	60	Christchurch City	13	Canterbury Region	2.47967e+06	5.74845e+06	1	2509803	6	980	88	2
2509806	168	588101	Redwood North	6001	Shirley-Papanui Ward	60	Christchurch City	13	Canterbury Region	2.47928e+06	5.74855e+06	1	2509806	3	930	55	1
2509807	99	588101	Redwood North	6001	Shirley-Papanui Ward	60	Christchurch City	13	Canterbury Region	2.47947e+06	5.74853e+06	1	2509807	3	930	33	1
2509805	108	588101	Redwood North	6001	Shirley-Papanui Ward	60	Christchurch City	13	Canterbury Region	2.47922e+06	5.74861e+06	1	2509805	4	937	38	2
2510102	108	588101	Redwood North	6001	Shirley-Papanui Ward	60	Christchurch City	13	Canterbury Region	2.47972e+06	5.74868e+06	1	2510102	2	904	36	1
151000	144	507400	Mairangi Bay	501	Northern Ward	5	North Shore City	02	Auckland Region	2.66584e+06	6.49376e+06	1	151000	4	952	50	2
2772602	219	598313	Levels	6404	Timaru Ward	64	Timaru District	13	Canterbury Region	2.37029e+06	5.65416e+06	1	2772602	2	908	72	1
2378400	228	584303	Motueka East	5104	Motueka Ward	51	Tasman District	16	Tasman Region	2.51118e+06	6.00946e+06	1	2378400	6	992	80	2
412301	153	514200	Newton	704	Hobson Ward	7	Auckland City	02	Auckland Region	2.66744e+06	6.48102e+06	1	412301	7	1016	54	2
2641702	39	594800	Barrington North	6006	Spreydon-Heathcote Ward	60	Christchurch City	13	Canterbury Region	2.47867e+06	5.73833e+06	1	2641702	9	1114	18	3
1593300	3	551800	New Plymouth Central	3301	New Plymouth City Ward	33	New Plymouth District	07	Taranaki Region	2.60367e+06	6.23842e+06	1	1593300	6	981	1	2
2641600	105	594800	Barrington North	6006	Spreydon-Heathcote Ward	60	Christchurch City	13	Canterbury Region	2.47877e+06	5.7386e+06	1	2641600	10	1142	47	3
1240200	174	540520	Glenholme West	2403	East Ward	24	Rotorua District	04	Bay of Plenty Region	2.79415e+06	6.33406e+06	1	1240200	10	1148	78	3
413100	69	514000	Freemans Bay	701	Western Bays Ward	7	Auckland City	02	Auckland Region	2.66688e+06	6.48165e+06	1	413100	9	1122	31	3
2117100	45	572900	Thorndon-Tinakori Road	4703	Lambton Ward	47	Wellington City	09	Wellington Region	2.65941e+06	5.99202e+06	1	2117100	3	927	15	1
2510700	117	588300	Casebrook	6001	Shirley-Papanui Ward	60	Christchurch City	13	Canterbury Region	2.47757e+06	5.7466e+06	1	2510700	10	1249	53	3
2509600	156	588101	Redwood North	6001	Shirley-Papanui Ward	60	Christchurch City	13	Canterbury Region	2.47926e+06	5.7477e+06	1	2509600	5	960	55	2
2509500	57	588101	Redwood North	6001	Shirley-Papanui Ward	60	Christchurch City	13	Canterbury Region	2.47907e+06	5.74772e+06	1	2509500	5	968	20	2
2509700	141	588101	Redwood North	6001	Shirley-Papanui Ward	60	Christchurch City	13	Canterbury Region	2.47949e+06	5.74766e+06	1	2509700	9	1132	63	3
1724300	108	556200	Gonville South	3702	Urban Ward	37	Wanganui District	08	Manawatu-Wanganui Region	2.68354e+06	6.13856e+06	1	1724300	10	1194	49	3
1724400	99	556200	Gonville South	3702	Urban Ward	37	Wanganui District	08	Manawatu-Wanganui Region	2.68373e+06	6.13861e+06	1	1724400	8	1030	45	3
2378300	93	584303	Motueka East	5104	Motueka Ward	51	Tasman District	16	Tasman Region	2.51092e+06	6.00944e+06	1	2378300	6	992	33	2
413300	222	514000	Freemans Bay	701	Western Bays Ward	7	Auckland City	02	Auckland Region	2.66688e+06	6.4815e+06	1	413300	9	1122	100	3
2509401	114	588101	Redwood North	6001	Shirley-Papanui Ward	60	Christchurch City	13	Canterbury Region	2.47962e+06	5.74798e+06	1	2509401	4	951	40	2
2509302	288	588101	Redwood North	6001	Shirley-Papanui Ward	60	Christchurch City	13	Canterbury Region	2.47937e+06	5.74795e+06	1	2509302	7	1020	101	2
1723500	138	556300	Gonville East	3702	Urban Ward	37	Wanganui District	08	Manawatu-Wanganui Region	2.68323e+06	6.13883e+06	1	1723500	7	1001	48	2
2379700	177	584301	Motueka West	5104	Motueka Ward	51	Tasman District	16	Tasman Region	2.50943e+06	6.00903e+06	1	2379700	7	1001	62	2
544200	12	518101	Mt Eden North	703	Eden-Albert Ward	7	Auckland City	02	Auckland Region	2.66658e+06	6.47981e+06	1	544200	4	948	4	2
674400	24	524601	Manukau Central	802	Papatoetoe Ward	8	Manukau City	02	Auckland Region	2.67634e+06	6.46671e+06	1	674400	8	1033	11	3
413000	363	514000	Freemans Bay	701	Western Bays Ward	7	Auckland City	02	Auckland Region	2.66673e+06	6.48163e+06	1	413000	8	1043	163	3
543400	276	518102	Sherbourne	703	Eden-Albert Ward	7	Auckland City	02	Auckland Region	2.66735e+06	6.47929e+06	1	543400	6	992	97	2
2122300	27	572900	Thorndon-Tinakori Road	4703	Lambton Ward	47	Wellington City	09	Wellington Region	2.65844e+06	5.99068e+06	1	2122300	4	947	9	2
1592500	3	551800	New Plymouth Central	3301	New Plymouth City Ward	33	New Plymouth District	07	Taranaki Region	2.60309e+06	6.23808e+06	1	1592500	6	999	1	2
2641800	84	594800	Barrington North	6006	Spreydon-Heathcote Ward	60	Christchurch City	13	Canterbury Region	2.47912e+06	5.73874e+06	1	2641800	4	948	29	2
412800	57	514200	Newton	704	Hobson Ward	7	Auckland City	02	Auckland Region	2.66705e+06	6.48067e+06	1	412800	7	1007	20	2
151202	114	507400	Mairangi Bay	501	Northern Ward	5	North Shore City	02	Auckland Region	2.66602e+06	6.49374e+06	1	151202	1	880	38	1
543600	51	518101	Mt Eden North	703	Eden-Albert Ward	7	Auckland City	02	Auckland Region	2.66717e+06	6.47978e+06	1	543600	2	915	17	1
674900	36	524601	Manukau Central	802	Papatoetoe Ward	8	Manukau City	02	Auckland Region	2.67593e+06	6.46585e+06	1	674900	9	1097	16	3
2379100	57	584301	Motueka West	5104	Motueka Ward	51	Tasman District	16	Tasman Region	2.51062e+06	6.01066e+06	1	2379100	7	1005	20	2
412401	123	514200	Newton	704	Hobson Ward	7	Auckland City	02	Auckland Region	2.66733e+06	6.48067e+06	1	412401	3	921	41	1
2379200	126	584301	Motueka West	5104	Motueka Ward	51	Tasman District	16	Tasman Region	2.51084e+06	6.01044e+06	1	2379200	7	1005	44	2
2379000	36	584301	Motueka West	5104	Motueka Ward	51	Tasman District	16	Tasman Region	2.51048e+06	6.01066e+06	1	2379000	10	1146	16	3
412700	27	514200	Newton	704	Hobson Ward	7	Auckland City	02	Auckland Region	2.66716e+06	6.48062e+06	1	412700	6	984	9	2
151500	174	507400	Mairangi Bay	501	Northern Ward	5	North Shore City	02	Auckland Region	2.66607e+06	6.4936e+06	1	151500	2	909	57	1
544100	120	518101	Mt Eden North	703	Eden-Albert Ward	7	Auckland City	02	Auckland Region	2.66726e+06	6.47951e+06	1	544100	6	998	42	2
151103	69	508805	Windsor Park	501	Northern Ward	5	North Shore City	02	Auckland Region	2.66575e+06	6.49384e+06	1	151103	5	958	24	2
1592700	3	551800	New Plymouth Central	3301	New Plymouth City Ward	33	New Plymouth District	07	Taranaki Region	2.60313e+06	6.23801e+06	1	1592700	6	999	1	2
543700	180	518101	Mt Eden North	703	Eden-Albert Ward	7	Auckland City	02	Auckland Region	2.66712e+06	6.47969e+06	1	543700	5	962	63	2
2510800	87	588300	Casebrook	6001	Shirley-Papanui Ward	60	Christchurch City	13	Canterbury Region	2.47736e+06	5.74638e+06	1	2510800	10	1249	39	3
282302	258	512902	Otimai	602	Waitakere Ward	6	Waitakere City	02	Auckland Region	2.65458e+06	6.47198e+06	1	282302	1	873	85	1
2902600	219	603100	Stuart St-Frederick St	7103	Cargill Ward	71	Dunedin City	14	Otago Region	2.31576e+06	5.4788e+06	1	2902600	9	1089	99	3
2903500	45	603100	Stuart St-Frederick St	7103	Cargill Ward	71	Dunedin City	14	Otago Region	2.31591e+06	5.47875e+06	1	2903500	8	1032	20	3
1723900	153	556300	Gonville East	3702	Urban Ward	37	Wanganui District	08	Manawatu-Wanganui Region	2.68353e+06	6.13872e+06	1	1723900	8	1066	69	3
1723300	99	556300	Gonville East	3702	Urban Ward	37	Wanganui District	08	Manawatu-Wanganui Region	2.68337e+06	6.13928e+06	1	1723300	9	1130	45	3
544700	36	518101	Mt Eden North	703	Eden-Albert Ward	7	Auckland City	02	Auckland Region	2.66657e+06	6.4797e+06	1	544700	3	934	12	1
543500	102	518101	Mt Eden North	703	Eden-Albert Ward	7	Auckland City	02	Auckland Region	2.66721e+06	6.47983e+06	1	543500	4	950	36	2
412600	33	514200	Newton	704	Hobson Ward	7	Auckland City	02	Auckland Region	2.66719e+06	6.48073e+06	1	412600	6	984	12	2
543300	102	518102	Sherbourne	703	Eden-Albert Ward	7	Auckland City	02	Auckland Region	2.66718e+06	6.4793e+06	1	543300	7	1014	36	2
2379600	111	584301	Motueka West	5104	Motueka Ward	51	Tasman District	16	Tasman Region	2.50986e+06	6.00942e+06	1	2379600	6	997	39	2
1592000	3	551800	New Plymouth Central	3301	New Plymouth City Ward	33	New Plymouth District	07	Taranaki Region	2.60285e+06	6.2379e+06	1	1592000	6	999	1	2
1592900	3	551800	New Plymouth Central	3301	New Plymouth City Ward	33	New Plymouth District	07	Taranaki Region	2.6032e+06	6.23791e+06	1	1592900	6	999	1	2
1592800	3	551800	New Plymouth Central	3301	New Plymouth City Ward	33	New Plymouth District	07	Taranaki Region	2.60306e+06	6.23786e+06	1	1592800	6	999	1	2
2510600	219	588300	Casebrook	6001	Shirley-Papanui Ward	60	Christchurch City	13	Canterbury Region	2.47745e+06	5.74658e+06	1	2510600	10	1139	99	3
2775701	105	599200	Glenwood	6404	Timaru Ward	64	Timaru District	13	Canterbury Region	2.36711e+06	5.64483e+06	1	2775701	4	953	37	2
2775300	132	599200	Glenwood	6404	Timaru Ward	64	Timaru District	13	Canterbury Region	2.36751e+06	5.64491e+06	1	2775300	3	932	44	1
2774905	165	599300	Gleniti	6404	Timaru Ward	64	Timaru District	13	Canterbury Region	2.36676e+06	5.64484e+06	1	2774905	4	951	58	2
2775600	144	599200	Glenwood	6404	Timaru Ward	64	Timaru District	13	Canterbury Region	2.36713e+06	5.64495e+06	1	2775600	2	905	48	1
2907200	69	604010	Roslyn North	7104	Hills Ward	71	Dunedin City	14	Otago Region	2.31481e+06	5.47964e+06	1	2907200	7	1013	24	2
2905900	126	604010	Roslyn North	7104	Hills Ward	71	Dunedin City	14	Otago Region	2.31557e+06	5.47962e+06	1	2905900	1	870	42	1
2907400	75	604010	Roslyn North	7104	Hills Ward	71	Dunedin City	14	Otago Region	2.31508e+06	5.47967e+06	1	2907400	3	920	25	1
2906001	93	604010	Roslyn North	7104	Hills Ward	71	Dunedin City	14	Otago Region	2.31553e+06	5.47956e+06	1	2906001	1	890	31	1
416100	69	514000	Freemans Bay	701	Western Bays Ward	7	Auckland City	02	Auckland Region	2.66629e+06	6.48207e+06	1	416100	7	1000	24	2
546500	120	518102	Sherbourne	703	Eden-Albert Ward	7	Auckland City	02	Auckland Region	2.66729e+06	6.47902e+06	1	546500	5	956	42	2
415600	147	514000	Freemans Bay	701	Western Bays Ward	7	Auckland City	02	Auckland Region	2.66605e+06	6.48199e+06	1	415600	5	966	51	2
1595200	105	552002	Marsland Hill	3301	New Plymouth City Ward	33	New Plymouth District	07	Taranaki Region	2.60348e+06	6.23771e+06	1	1595200	6	988	37	2
2119700	27	572900	Thorndon-Tinakori Road	4703	Lambton Ward	47	Wellington City	09	Wellington Region	2.65878e+06	5.99074e+06	1	2119700	5	967	9	2
1596500	123	552001	Mount Bryan	3301	New Plymouth City Ward	33	New Plymouth District	07	Taranaki Region	2.60433e+06	6.23828e+06	1	1596500	7	1013	43	2
2120400	93	572900	Thorndon-Tinakori Road	4703	Lambton Ward	47	Wellington City	09	Wellington Region	2.65889e+06	5.99141e+06	1	2120400	5	962	33	2
417000	156	514000	Freemans Bay	701	Western Bays Ward	7	Auckland City	02	Auckland Region	2.6665e+06	6.48191e+06	1	417000	2	901	51	1
2644900	183	595000	Spreydon	6006	Spreydon-Heathcote Ward	60	Christchurch City	13	Canterbury Region	2.47994e+06	5.73942e+06	1	2644900	7	1003	64	2
2644600	93	595000	Spreydon	6006	Spreydon-Heathcote Ward	60	Christchurch City	13	Canterbury Region	2.47977e+06	5.73918e+06	1	2644600	7	1001	33	2
2643900	129	595000	Spreydon	6006	Spreydon-Heathcote Ward	60	Christchurch City	13	Canterbury Region	2.47968e+06	5.73974e+06	1	2643900	5	961	45	2
547700	240	518201	Balmoral	703	Eden-Albert Ward	7	Auckland City	02	Auckland Region	2.66705e+06	6.47859e+06	1	547700	5	972	84	2
545000	174	518101	Mt Eden North	703	Eden-Albert Ward	7	Auckland City	02	Auckland Region	2.66686e+06	6.47963e+06	1	545000	6	985	61	2
1594000	24	551800	New Plymouth Central	3301	New Plymouth City Ward	33	New Plymouth District	07	Taranaki Region	2.60361e+06	6.23818e+06	1	1594000	7	1013	8	2
2118800	6	572900	Thorndon-Tinakori Road	4703	Lambton Ward	47	Wellington City	09	Wellington Region	2.65909e+06	5.99101e+06	1	2118800	3	931	2	1
2119000	33	572900	Thorndon-Tinakori Road	4703	Lambton Ward	47	Wellington City	09	Wellington Region	2.65909e+06	5.99096e+06	1	2119000	3	931	11	1
414700	69	514000	Freemans Bay	701	Western Bays Ward	7	Auckland City	02	Auckland Region	2.66626e+06	6.48184e+06	1	414700	2	904	23	1
2118500	6	572900	Thorndon-Tinakori Road	4703	Lambton Ward	47	Wellington City	09	Wellington Region	2.65905e+06	5.99137e+06	1	2118500	3	931	2	1
414900	60	514000	Freemans Bay	701	Western Bays Ward	7	Auckland City	02	Auckland Region	2.66613e+06	6.48166e+06	1	414900	2	904	20	1
413700	135	514000	Freemans Bay	701	Western Bays Ward	7	Auckland City	02	Auckland Region	2.6665e+06	6.48139e+06	1	413700	2	916	45	1
414500	30	514000	Freemans Bay	701	Western Bays Ward	7	Auckland City	02	Auckland Region	2.66627e+06	6.48127e+06	1	414500	3	924	10	1
1725500	69	556200	Gonville South	3702	Urban Ward	37	Wanganui District	08	Manawatu-Wanganui Region	2.6838e+06	6.13836e+06	1	1725500	9	1101	31	3
1725600	177	556200	Gonville South	3702	Urban Ward	37	Wanganui District	08	Manawatu-Wanganui Region	2.68361e+06	6.13828e+06	1	1725600	10	1140	80	3
2774300	120	598700	Washdyke	6404	Timaru Ward	64	Timaru District	13	Canterbury Region	2.36957e+06	5.64701e+06	1	2774300	5	971	42	2
2380100	123	584301	Motueka West	5104	Motueka Ward	51	Tasman District	16	Tasman Region	2.51069e+06	6.00851e+06	1	2380100	7	1011	43	2
415000	60	514000	Freemans Bay	701	Western Bays Ward	7	Auckland City	02	Auckland Region	2.66616e+06	6.48158e+06	1	415000	1	895	20	1
2379800	132	584301	Motueka West	5104	Motueka Ward	51	Tasman District	16	Tasman Region	2.50973e+06	6.00904e+06	1	2379800	8	1046	59	3
2379900	87	584301	Motueka West	5104	Motueka Ward	51	Tasman District	16	Tasman Region	2.51053e+06	6.00911e+06	1	2379900	7	1011	30	2
1463700	114	545852	Pakipaki	3009	Poukawa Ward	30	Hastings District	06	Hawke's Bay Region	2.83504e+06	6.16129e+06	1	1463700	8	1031	51	3
1593900	6	551800	New Plymouth Central	3301	New Plymouth City Ward	33	New Plymouth District	07	Taranaki Region	2.60332e+06	6.23808e+06	1	1593900	7	1013	2	2
2118300	201	572900	Thorndon-Tinakori Road	4703	Lambton Ward	47	Wellington City	09	Wellington Region	2.6593e+06	5.99086e+06	1	2118300	4	940	70	2
2643200	36	595000	Spreydon	6006	Spreydon-Heathcote Ward	60	Christchurch City	13	Canterbury Region	2.47931e+06	5.73902e+06	1	2643200	7	1004	13	2
2511700	195	588300	Casebrook	6001	Shirley-Papanui Ward	60	Christchurch City	13	Canterbury Region	2.47795e+06	5.74684e+06	1	2511700	9	1102	88	3
2512000	192	588200	Styx Mill	6001	Shirley-Papanui Ward	60	Christchurch City	13	Canterbury Region	2.47823e+06	5.74726e+06	1	2512000	4	953	67	2
2904500	48	604020	Roslyn South	7104	Hills Ward	71	Dunedin City	14	Otago Region	2.31465e+06	5.47895e+06	1	2904500	2	913	16	1
2904600	156	604020	Roslyn South	7104	Hills Ward	71	Dunedin City	14	Otago Region	2.31466e+06	5.47886e+06	1	2904600	1	892	51	1
1724800	114	556200	Gonville South	3702	Urban Ward	37	Wanganui District	08	Manawatu-Wanganui Region	2.68319e+06	6.13824e+06	1	1724800	7	1017	40	2
2904100	180	603100	Stuart St-Frederick St	7103	Cargill Ward	71	Dunedin City	14	Otago Region	2.31619e+06	5.47929e+06	1	2904100	6	995	63	2
413800	45	514000	Freemans Bay	701	Western Bays Ward	7	Auckland City	02	Auckland Region	2.66665e+06	6.48107e+06	1	413800	7	1011	16	2
545800	54	518102	Sherbourne	703	Eden-Albert Ward	7	Auckland City	02	Auckland Region	2.66666e+06	6.47948e+06	1	545800	3	924	18	1
1463200	207	545842	Bridge Pa	3007	Maraekakaho Ward	30	Hastings District	06	Hawke's Bay Region	2.83193e+06	6.16572e+06	1	1463200	9	1131	93	3
544900	150	518101	Mt Eden North	703	Eden-Albert Ward	7	Auckland City	02	Auckland Region	2.66672e+06	6.47964e+06	1	544900	7	1014	52	2
1594600	39	551800	New Plymouth Central	3301	New Plymouth City Ward	33	New Plymouth District	07	Taranaki Region	2.60363e+06	6.23798e+06	1	1594600	6	981	14	2
1593500	9	551800	New Plymouth Central	3301	New Plymouth City Ward	33	New Plymouth District	07	Taranaki Region	2.60394e+06	6.23853e+06	1	1593500	6	981	3	2
2904700	105	604020	Roslyn South	7104	Hills Ward	71	Dunedin City	14	Otago Region	2.31433e+06	5.47869e+06	1	2904700	2	913	35	1
2904800	123	604020	Roslyn South	7104	Hills Ward	71	Dunedin City	14	Otago Region	2.31445e+06	5.47867e+06	1	2904800	3	932	41	1
1724500	147	556200	Gonville South	3702	Urban Ward	37	Wanganui District	08	Manawatu-Wanganui Region	2.68397e+06	6.13864e+06	1	1724500	8	1032	66	3
2774606	138	599300	Gleniti	6404	Timaru Ward	64	Timaru District	13	Canterbury Region	2.36577e+06	5.64575e+06	1	2774606	3	920	46	1
2774607	135	599300	Gleniti	6404	Timaru Ward	64	Timaru District	13	Canterbury Region	2.36602e+06	5.64566e+06	1	2774607	3	930	45	1
2905300	102	604020	Roslyn South	7104	Hills Ward	71	Dunedin City	14	Otago Region	2.31509e+06	5.47916e+06	1	2905300	5	971	36	2
2905201	42	604010	Roslyn North	7104	Hills Ward	71	Dunedin City	14	Otago Region	2.31528e+06	5.47923e+06	1	2905201	3	929	14	1
546400	141	518102	Sherbourne	703	Eden-Albert Ward	7	Auckland City	02	Auckland Region	2.66752e+06	6.47919e+06	1	546400	6	975	49	2
545300	123	518102	Sherbourne	703	Eden-Albert Ward	7	Auckland City	02	Auckland Region	2.66696e+06	6.47936e+06	1	545300	6	991	43	2
413900	120	514000	Freemans Bay	701	Western Bays Ward	7	Auckland City	02	Auckland Region	2.66681e+06	6.48114e+06	1	413900	2	913	40	1
2642003	36	594800	Barrington North	6006	Spreydon-Heathcote Ward	60	Christchurch City	13	Canterbury Region	2.47932e+06	5.73863e+06	1	2642003	4	940	13	2
2510900	99	588300	Casebrook	6001	Shirley-Papanui Ward	60	Christchurch City	13	Canterbury Region	2.4776e+06	5.74625e+06	1	2510900	10	1141	45	3
2511100	132	588300	Casebrook	6001	Shirley-Papanui Ward	60	Christchurch City	13	Canterbury Region	2.47752e+06	5.74614e+06	1	2511100	10	1141	59	3
2643300	78	595000	Spreydon	6006	Spreydon-Heathcote Ward	60	Christchurch City	13	Canterbury Region	2.47942e+06	5.73888e+06	1	2643300	6	980	27	2
414200	141	514000	Freemans Bay	701	Western Bays Ward	7	Auckland City	02	Auckland Region	2.66644e+06	6.48152e+06	1	414200	5	954	49	2
414300	63	514000	Freemans Bay	701	Western Bays Ward	7	Auckland City	02	Auckland Region	2.66639e+06	6.48138e+06	1	414300	5	954	22	2
2511601	126	588300	Casebrook	6001	Shirley-Papanui Ward	60	Christchurch City	13	Canterbury Region	2.47779e+06	5.74716e+06	1	2511601	8	1036	57	3
2511602	183	588300	Casebrook	6001	Shirley-Papanui Ward	60	Christchurch City	13	Canterbury Region	2.47806e+06	5.74711e+06	1	2511602	8	1043	82	3
2511502	201	588300	Casebrook	6001	Shirley-Papanui Ward	60	Christchurch City	13	Canterbury Region	2.47766e+06	5.74708e+06	1	2511502	6	992	70	2
2642600	144	595000	Spreydon	6006	Spreydon-Heathcote Ward	60	Christchurch City	13	Canterbury Region	2.47891e+06	5.73979e+06	1	2642600	10	1172	65	3
2643400	216	595000	Spreydon	6006	Spreydon-Heathcote Ward	60	Christchurch City	13	Canterbury Region	2.47917e+06	5.73977e+06	1	2643400	9	1101	97	3
2642500	135	595000	Spreydon	6006	Spreydon-Heathcote Ward	60	Christchurch City	13	Canterbury Region	2.47865e+06	5.7398e+06	1	2642500	10	1143	61	3
1725900	138	556200	Gonville South	3702	Urban Ward	37	Wanganui District	08	Manawatu-Wanganui Region	2.68375e+06	6.1379e+06	1	1725900	8	1052	62	3
1725000	156	556200	Gonville South	3702	Urban Ward	37	Wanganui District	08	Manawatu-Wanganui Region	2.68311e+06	6.13799e+06	1	1725000	7	1029	55	2
2773700	240	598700	Washdyke	6404	Timaru Ward	64	Timaru District	13	Canterbury Region	2.36952e+06	5.64937e+06	1	2773700	7	1028	84	2
2773800	9	598700	Washdyke	6404	Timaru Ward	64	Timaru District	13	Canterbury Region	2.36977e+06	5.64903e+06	1	2773800	5	964	3	2
545700	180	518102	Sherbourne	703	Eden-Albert Ward	7	Auckland City	02	Auckland Region	2.66696e+06	6.47918e+06	1	545700	6	982	63	2
2118900	39	572900	Thorndon-Tinakori Road	4703	Lambton Ward	47	Wellington City	09	Wellington Region	2.65918e+06	5.99107e+06	1	2118900	3	931	13	1
2118100	60	572900	Thorndon-Tinakori Road	4703	Lambton Ward	47	Wellington City	09	Wellington Region	2.65931e+06	5.99104e+06	1	2118100	3	927	20	1
2642001	42	594800	Barrington North	6006	Spreydon-Heathcote Ward	60	Christchurch City	13	Canterbury Region	2.47907e+06	5.73853e+06	1	2642001	4	940	15	2
1724700	123	556200	Gonville South	3702	Urban Ward	37	Wanganui District	08	Manawatu-Wanganui Region	2.68297e+06	6.13836e+06	1	1724700	7	1015	43	2
2905500	177	604020	Roslyn South	7104	Hills Ward	71	Dunedin City	14	Otago Region	2.31487e+06	5.47899e+06	1	2905500	3	928	58	1
2905600	87	604020	Roslyn South	7104	Hills Ward	71	Dunedin City	14	Otago Region	2.3151e+06	5.47905e+06	1	2905600	5	971	30	2
2774000	48	598700	Washdyke	6404	Timaru Ward	64	Timaru District	13	Canterbury Region	2.36973e+06	5.64808e+06	1	2774000	5	964	17	2
2773900	24	598700	Washdyke	6404	Timaru Ward	64	Timaru District	13	Canterbury Region	2.36946e+06	5.64867e+06	1	2773900	5	964	8	2
2774100	6	598700	Washdyke	6404	Timaru Ward	64	Timaru District	13	Canterbury Region	2.36995e+06	5.64837e+06	1	2774100	5	964	2	2
2774400	3	598700	Washdyke	6404	Timaru Ward	64	Timaru District	13	Canterbury Region	2.37005e+06	5.64701e+06	1	2774400	5	964	1	2
2774202	237	598700	Washdyke	6404	Timaru Ward	64	Timaru District	13	Canterbury Region	2.36985e+06	5.64725e+06	1	2774202	5	964	83	2
151603	54	508520	Sunnynook	502	Central Ward	5	North Shore City	02	Auckland Region	2.66587e+06	6.49345e+06	1	151603	3	924	18	1
545200	108	518102	Sherbourne	703	Eden-Albert Ward	7	Auckland City	02	Auckland Region	2.66687e+06	6.4794e+06	1	545200	4	944	38	2
2122500	147	572900	Thorndon-Tinakori Road	4703	Lambton Ward	47	Wellington City	09	Wellington Region	2.65901e+06	5.99064e+06	1	2122500	6	985	51	2
1594900	63	552002	Marsland Hill	3301	New Plymouth City Ward	33	New Plymouth District	07	Taranaki Region	2.60402e+06	6.23812e+06	1	1594900	9	1077	28	3
2118200	93	572900	Thorndon-Tinakori Road	4703	Lambton Ward	47	Wellington City	09	Wellington Region	2.65934e+06	5.99096e+06	1	2118200	4	938	33	2
414800	90	514000	Freemans Bay	701	Western Bays Ward	7	Auckland City	02	Auckland Region	2.66629e+06	6.48176e+06	1	414800	2	914	30	1
2188102	120	576001	Island Bay West	4705	Southern Ward	47	Wellington City	09	Wellington Region	2.65795e+06	5.98374e+06	1	2188102	3	935	40	1
2642700	192	595000	Spreydon	6006	Spreydon-Heathcote Ward	60	Christchurch City	13	Canterbury Region	2.47874e+06	5.73963e+06	1	2642700	6	983	67	2
414400	60	514000	Freemans Bay	701	Western Bays Ward	7	Auckland City	02	Auckland Region	2.66633e+06	6.48131e+06	1	414400	3	924	20	1
2905700	72	604010	Roslyn North	7104	Hills Ward	71	Dunedin City	14	Otago Region	2.31542e+06	5.4798e+06	1	2905700	1	861	24	1
2380200	126	584303	Motueka East	5104	Motueka Ward	51	Tasman District	16	Tasman Region	2.51089e+06	6.0088e+06	1	2380200	9	1092	57	3
415100	192	514000	Freemans Bay	701	Western Bays Ward	7	Auckland City	02	Auckland Region	2.66634e+06	6.48169e+06	1	415100	8	1032	86	3
545500	72	518102	Sherbourne	703	Eden-Albert Ward	7	Auckland City	02	Auckland Region	2.6668e+06	6.47925e+06	1	545500	4	948	25	2
414600	54	514000	Freemans Bay	701	Western Bays Ward	7	Auckland City	02	Auckland Region	2.66613e+06	6.48182e+06	1	414600	1	895	18	1
414100	129	514000	Freemans Bay	701	Western Bays Ward	7	Auckland City	02	Auckland Region	2.66633e+06	6.48158e+06	1	414100	3	931	43	1
1594800	33	552002	Marsland Hill	3301	New Plymouth City Ward	33	New Plymouth District	07	Taranaki Region	2.60379e+06	6.23804e+06	1	1594800	9	1077	15	3
2118600	9	572900	Thorndon-Tinakori Road	4703	Lambton Ward	47	Wellington City	09	Wellington Region	2.65903e+06	5.99116e+06	1	2118600	3	931	3	1
2118000	171	572900	Thorndon-Tinakori Road	4703	Lambton Ward	47	Wellington City	09	Wellington Region	2.65924e+06	5.99117e+06	1	2118000	4	939	60	2
2512400	198	588200	Styx Mill	6001	Shirley-Papanui Ward	60	Christchurch City	13	Canterbury Region	2.47889e+06	5.74731e+06	1	2512400	9	1096	89	3
2512200	81	588200	Styx Mill	6001	Shirley-Papanui Ward	60	Christchurch City	13	Canterbury Region	2.47846e+06	5.74728e+06	1	2512200	10	1196	36	3
1724900	45	556200	Gonville South	3702	Urban Ward	37	Wanganui District	08	Manawatu-Wanganui Region	2.68295e+06	6.1382e+06	1	1724900	7	1017	16	2
2905100	27	604020	Roslyn South	7104	Hills Ward	71	Dunedin City	14	Otago Region	2.31506e+06	5.47928e+06	1	2905100	3	929	9	1
415300	27	514000	Freemans Bay	701	Western Bays Ward	7	Auckland City	02	Auckland Region	2.66656e+06	6.48176e+06	1	415300	2	914	9	1
544800	15	518101	Mt Eden North	703	Eden-Albert Ward	7	Auckland City	02	Auckland Region	2.66656e+06	6.4796e+06	1	544800	6	979	5	2
545100	123	518102	Sherbourne	703	Eden-Albert Ward	7	Auckland City	02	Auckland Region	2.66675e+06	6.47944e+06	1	545100	6	990	43	2
1463602	57	545852	Pakipaki	3009	Poukawa Ward	30	Hastings District	06	Hawke's Bay Region	2.83479e+06	6.1609e+06	1	1463602	8	1031	26	3
1463300	63	545842	Bridge Pa	3007	Maraekakaho Ward	30	Hastings District	06	Hawke's Bay Region	2.83294e+06	6.16534e+06	1	1463300	1	886	21	1
415200	21	514000	Freemans Bay	701	Western Bays Ward	7	Auckland City	02	Auckland Region	2.66649e+06	6.4817e+06	1	415200	2	900	7	1
545400	111	518102	Sherbourne	703	Eden-Albert Ward	7	Auckland City	02	Auckland Region	2.66707e+06	6.47933e+06	1	545400	6	987	39	2
414000	114	514000	Freemans Bay	701	Western Bays Ward	7	Auckland City	02	Auckland Region	2.66618e+06	6.48145e+06	1	414000	3	924	38	1
1594500	15	551800	New Plymouth Central	3301	New Plymouth City Ward	33	New Plymouth District	07	Taranaki Region	2.60342e+06	6.2379e+06	1	1594500	6	981	5	2
546300	78	518102	Sherbourne	703	Eden-Albert Ward	7	Auckland City	02	Auckland Region	2.66734e+06	6.47913e+06	1	546300	3	924	26	1
2642002	57	594800	Barrington North	6006	Spreydon-Heathcote Ward	60	Christchurch City	13	Canterbury Region	2.4792e+06	5.73856e+06	1	2642002	4	940	20	2
2511000	117	588300	Casebrook	6001	Shirley-Papanui Ward	60	Christchurch City	13	Canterbury Region	2.47729e+06	5.74627e+06	1	2511000	8	1036	53	3
2511800	129	588300	Casebrook	6001	Shirley-Papanui Ward	60	Christchurch City	13	Canterbury Region	2.47794e+06	5.74662e+06	1	2511800	8	1059	58	3
2908400	177	604020	Roslyn South	7104	Hills Ward	71	Dunedin City	14	Otago Region	2.31433e+06	5.47905e+06	1	2908400	3	919	58	1
2908300	141	604020	Roslyn South	7104	Hills Ward	71	Dunedin City	14	Otago Region	2.31469e+06	5.47913e+06	1	2908300	2	903	47	1
2515203	120	590400	Belfast	6001	Shirley-Papanui Ward	60	Christchurch City	13	Canterbury Region	2.47947e+06	5.75016e+06	1	2515203	3	928	40	1
2515106	105	590400	Belfast	6001	Shirley-Papanui Ward	60	Christchurch City	13	Canterbury Region	2.47927e+06	5.75037e+06	1	2515106	3	926	35	1
2515201	216	590400	Belfast	6001	Shirley-Papanui Ward	60	Christchurch City	13	Canterbury Region	2.47964e+06	5.75022e+06	1	2515201	5	971	76	2
2515103	135	590400	Belfast	6001	Shirley-Papanui Ward	60	Christchurch City	13	Canterbury Region	2.47901e+06	5.7504e+06	1	2515103	1	892	45	1
2908700	21	604020	Roslyn South	7104	Hills Ward	71	Dunedin City	14	Otago Region	2.31413e+06	5.47918e+06	1	2908700	4	939	7	2
2515108	30	590400	Belfast	6001	Shirley-Papanui Ward	60	Christchurch City	13	Canterbury Region	2.47921e+06	5.75015e+06	1	2515108	2	914	10	1
2515107	54	590400	Belfast	6001	Shirley-Papanui Ward	60	Christchurch City	13	Canterbury Region	2.47922e+06	5.75024e+06	1	2515107	2	914	18	1
681308	3	522722	Aberfeldy	806	Howick Ward	8	Manukau City	02	Auckland Region	2.68045e+06	6.47628e+06	1	681308	8	1032	1	3
2121300	3	572900	Thorndon-Tinakori Road	4703	Lambton Ward	47	Wellington City	09	Wellington Region	2.65888e+06	5.99074e+06	1	2121300	7	1009	1	2
1598000	9	552100	Fitzroy	3301	New Plymouth City Ward	33	New Plymouth District	07	Taranaki Region	2.60482e+06	6.23829e+06	1	1598000	4	944	3	2
2513100	141	588200	Styx Mill	6001	Shirley-Papanui Ward	60	Christchurch City	13	Canterbury Region	2.47893e+06	5.74809e+06	1	2513100	5	956	49	2
416600	108	514000	Freemans Bay	701	Western Bays Ward	7	Auckland City	02	Auckland Region	2.66652e+06	6.48214e+06	1	416600	2	903	36	1
2774801	165	599300	Gleniti	6404	Timaru Ward	64	Timaru District	13	Canterbury Region	2.36611e+06	5.64539e+06	1	2774801	2	905	54	1
415900	12	514000	Freemans Bay	701	Western Bays Ward	7	Auckland City	02	Auckland Region	2.66627e+06	6.48217e+06	1	415900	3	920	4	1
678502	132	522603	Bleakhouse	806	Howick Ward	8	Manukau City	02	Auckland Region	2.68171e+06	6.47782e+06	1	678502	1	886	44	1
416200	36	514000	Freemans Bay	701	Western Bays Ward	7	Auckland City	02	Auckland Region	2.66618e+06	6.4821e+06	1	416200	8	1060	16	3
547100	111	518102	Sherbourne	703	Eden-Albert Ward	7	Auckland City	02	Auckland Region	2.66733e+06	6.47887e+06	1	547100	7	1017	39	2
415800	60	514000	Freemans Bay	701	Western Bays Ward	7	Auckland City	02	Auckland Region	2.66617e+06	6.4822e+06	1	415800	3	920	20	1
1596600	96	552001	Mount Bryan	3301	New Plymouth City Ward	33	New Plymouth District	07	Taranaki Region	2.60437e+06	6.23813e+06	1	1596600	5	967	34	2
1595300	81	552002	Marsland Hill	3301	New Plymouth City Ward	33	New Plymouth District	07	Taranaki Region	2.60323e+06	6.23764e+06	1	1595300	8	1042	36	3
2119400	33	572900	Thorndon-Tinakori Road	4703	Lambton Ward	47	Wellington City	09	Wellington Region	2.65883e+06	5.99098e+06	1	2119400	6	977	12	2
678801	285	522603	Bleakhouse	806	Howick Ward	8	Manukau City	02	Auckland Region	2.68176e+06	6.47758e+06	1	678801	4	935	100	2
2645200	123	595400	Somerfield	6006	Spreydon-Heathcote Ward	60	Christchurch City	13	Canterbury Region	2.47949e+06	5.73879e+06	1	2645200	4	936	43	2
678602	45	522603	Bleakhouse	806	Howick Ward	8	Manukau City	02	Auckland Region	2.68197e+06	6.47768e+06	1	678602	1	886	15	1
2643700	138	595000	Spreydon	6006	Spreydon-Heathcote Ward	60	Christchurch City	13	Canterbury Region	2.47928e+06	5.73963e+06	1	2643700	8	1065	62	3
2644700	126	595000	Spreydon	6006	Spreydon-Heathcote Ward	60	Christchurch City	13	Canterbury Region	2.47974e+06	5.73967e+06	1	2644700	6	985	44	2
415400	57	514000	Freemans Bay	701	Western Bays Ward	7	Auckland City	02	Auckland Region	2.66602e+06	6.48225e+06	1	415400	2	900	19	1
1726300	81	556200	Gonville South	3702	Urban Ward	37	Wanganui District	08	Manawatu-Wanganui Region	2.68411e+06	6.13838e+06	1	1726300	6	994	28	2
2906300	168	604010	Roslyn North	7104	Hills Ward	71	Dunedin City	14	Otago Region	2.3152e+06	5.47941e+06	1	2906300	1	895	55	1
2907500	21	604010	Roslyn North	7104	Hills Ward	71	Dunedin City	14	Otago Region	2.31479e+06	5.47948e+06	1	2907500	4	951	7	2
2775500	249	599200	Glenwood	6404	Timaru Ward	64	Timaru District	13	Canterbury Region	2.36708e+06	5.64515e+06	1	2775500	2	900	82	1
2774803	90	599300	Gleniti	6404	Timaru Ward	64	Timaru District	13	Canterbury Region	2.36651e+06	5.64528e+06	1	2774803	4	940	31	2
2774804	99	599300	Gleniti	6404	Timaru Ward	64	Timaru District	13	Canterbury Region	2.36675e+06	5.64526e+06	1	2774804	4	940	35	2
285600	264	511100	Glen Eden East	604	New Lynn Ward	6	Waitakere City	02	Auckland Region	2.65803e+06	6.4755e+06	1	285600	6	991	92	2
678601	126	522603	Bleakhouse	806	Howick Ward	8	Manukau City	02	Auckland Region	2.68201e+06	6.47781e+06	1	678601	1	886	42	1
1595000	162	552002	Marsland Hill	3301	New Plymouth City Ward	33	New Plymouth District	07	Taranaki Region	2.60403e+06	6.23798e+06	1	1595000	8	1048	73	3
1596000	150	552001	Mount Bryan	3301	New Plymouth City Ward	33	New Plymouth District	07	Taranaki Region	2.60412e+06	6.23866e+06	1	1596000	5	957	52	2
1595800	150	552001	Mount Bryan	3301	New Plymouth City Ward	33	New Plymouth District	07	Taranaki Region	2.60382e+06	6.23868e+06	1	1595800	7	1007	52	2
2645100	150	595400	Somerfield	6006	Spreydon-Heathcote Ward	60	Christchurch City	13	Canterbury Region	2.47978e+06	5.73903e+06	1	2645100	6	983	52	2
2644400	84	595000	Spreydon	6006	Spreydon-Heathcote Ward	60	Christchurch City	13	Canterbury Region	2.47957e+06	5.73904e+06	1	2644400	7	1001	29	2
416900	102	514000	Freemans Bay	701	Western Bays Ward	7	Auckland City	02	Auckland Region	2.66643e+06	6.482e+06	1	416900	4	942	36	2
546700	168	518102	Sherbourne	703	Eden-Albert Ward	7	Auckland City	02	Auckland Region	2.66752e+06	6.47871e+06	1	546700	4	947	59	2
1726500	54	556200	Gonville South	3702	Urban Ward	37	Wanganui District	08	Manawatu-Wanganui Region	2.68421e+06	6.13812e+06	1	1726500	7	1010	19	2
1727400	36	557000	Spriggens Park	3702	Urban Ward	37	Wanganui District	08	Manawatu-Wanganui Region	2.68456e+06	6.13825e+06	1	1727400	9	1131	16	3
2774805	78	599300	Gleniti	6404	Timaru Ward	64	Timaru District	13	Canterbury Region	2.36647e+06	5.64517e+06	1	2774805	4	940	27	2
2775100	84	599200	Glenwood	6404	Timaru Ward	64	Timaru District	13	Canterbury Region	2.36744e+06	5.64511e+06	1	2775100	9	1100	38	3
2514100	141	590400	Belfast	6001	Shirley-Papanui Ward	60	Christchurch City	13	Canterbury Region	2.48052e+06	5.75151e+06	1	2514100	7	1019	49	2
2514200	174	590400	Belfast	6001	Shirley-Papanui Ward	60	Christchurch City	13	Canterbury Region	2.48045e+06	5.75136e+06	1	2514200	8	1044	78	3
2907000	27	604010	Roslyn North	7104	Hills Ward	71	Dunedin City	14	Otago Region	2.31525e+06	5.47978e+06	1	2907000	4	949	9	2
416300	93	514000	Freemans Bay	701	Western Bays Ward	7	Auckland City	02	Auckland Region	2.66619e+06	6.482e+06	1	416300	8	1060	42	3
1465200	18	545762	Longlands South	3003	Heretaunga Ward	30	Hastings District	06	Hawke's Bay Region	2.84074e+06	6.16254e+06	1	1465200	2	917	6	1
1595100	108	552002	Marsland Hill	3301	New Plymouth City Ward	33	New Plymouth District	07	Taranaki Region	2.60375e+06	6.23791e+06	1	1595100	7	1021	38	2
2120000	78	572900	Thorndon-Tinakori Road	4703	Lambton Ward	47	Wellington City	09	Wellington Region	2.65863e+06	5.99076e+06	1	2120000	5	967	27	2
1596300	123	552001	Mount Bryan	3301	New Plymouth City Ward	33	New Plymouth District	07	Taranaki Region	2.60449e+06	6.23846e+06	1	1596300	5	962	43	2
1596100	39	552001	Mount Bryan	3301	New Plymouth City Ward	33	New Plymouth District	07	Taranaki Region	2.60419e+06	6.23851e+06	1	1596100	5	967	14	2
416700	66	514000	Freemans Bay	701	Western Bays Ward	7	Auckland City	02	Auckland Region	2.66664e+06	6.4821e+06	1	416700	2	900	22	1
2776100	51	598314	Pareora	6404	Timaru Ward	64	Timaru District	13	Canterbury Region	2.36726e+06	5.63424e+06	1	2776100	6	976	18	2
678400	237	522603	Bleakhouse	806	Howick Ward	8	Manukau City	02	Auckland Region	2.68192e+06	6.47806e+06	1	678400	1	884	78	1
2906600	27	604010	Roslyn North	7104	Hills Ward	71	Dunedin City	14	Otago Region	2.31557e+06	5.47926e+06	1	2906600	3	922	9	1
2513502	108	590400	Belfast	6001	Shirley-Papanui Ward	60	Christchurch City	13	Canterbury Region	2.48025e+06	5.75065e+06	1	2513502	6	997	38	2
2513501	240	590400	Belfast	6001	Shirley-Papanui Ward	60	Christchurch City	13	Canterbury Region	2.48005e+06	5.75065e+06	1	2513501	6	995	84	2
2906500	24	604010	Roslyn North	7104	Hills Ward	71	Dunedin City	14	Otago Region	2.31552e+06	5.47921e+06	1	2906500	3	922	8	1
547002	60	518102	Sherbourne	703	Eden-Albert Ward	7	Auckland City	02	Auckland Region	2.66715e+06	6.47877e+06	1	547002	7	1000	21	2
2079000	93	573800	Johnsonville East	4701	Northern Ward	47	Wellington City	09	Wellington Region	2.66186e+06	5.997e+06	1	2079000	4	953	33	2
678200	201	522603	Bleakhouse	806	Howick Ward	8	Manukau City	02	Auckland Region	2.68177e+06	6.4783e+06	1	678200	1	896	66	1
1595400	117	552002	Marsland Hill	3301	New Plymouth City Ward	33	New Plymouth District	07	Taranaki Region	2.6038e+06	6.23779e+06	1	1595400	4	938	41	2
2120100	45	572900	Thorndon-Tinakori Road	4703	Lambton Ward	47	Wellington City	09	Wellington Region	2.65846e+06	5.99074e+06	1	2120100	5	967	16	2
2119900	15	572900	Thorndon-Tinakori Road	4703	Lambton Ward	47	Wellington City	09	Wellington Region	2.65868e+06	5.99072e+06	1	2119900	5	967	5	2
2120900	138	572900	Thorndon-Tinakori Road	4703	Lambton Ward	47	Wellington City	09	Wellington Region	2.65866e+06	5.9911e+06	1	2120900	4	950	48	2
1596400	69	552001	Mount Bryan	3301	New Plymouth City Ward	33	New Plymouth District	07	Taranaki Region	2.60425e+06	6.23842e+06	1	1596400	7	1009	24	2
2120300	84	572900	Thorndon-Tinakori Road	4703	Lambton Ward	47	Wellington City	09	Wellington Region	2.65903e+06	5.99151e+06	1	2120300	2	904	28	1
2644500	105	595000	Spreydon	6006	Spreydon-Heathcote Ward	60	Christchurch City	13	Canterbury Region	2.47966e+06	5.7392e+06	1	2644500	9	1126	47	3
2643600	156	595000	Spreydon	6006	Spreydon-Heathcote Ward	60	Christchurch City	13	Canterbury Region	2.47952e+06	5.73981e+06	1	2643600	10	1217	70	3
1726700	48	556200	Gonville South	3702	Urban Ward	37	Wanganui District	08	Manawatu-Wanganui Region	2.68444e+06	6.13811e+06	1	1726700	6	994	17	2
416000	165	514000	Freemans Bay	701	Western Bays Ward	7	Auckland City	02	Auckland Region	2.66637e+06	6.48216e+06	1	416000	7	1000	58	2
2775800	120	599200	Glenwood	6404	Timaru Ward	64	Timaru District	13	Canterbury Region	2.36744e+06	5.64473e+06	1	2775800	3	920	40	1
1727300	3	557000	Spriggens Park	3702	Urban Ward	37	Wanganui District	08	Manawatu-Wanganui Region	2.68499e+06	6.13854e+06	1	1727300	9	1075	1	3
2513505	78	590400	Belfast	6001	Shirley-Papanui Ward	60	Christchurch City	13	Canterbury Region	2.47973e+06	5.75002e+06	1	2513505	2	905	26	1
2091400	120	574302	Te Kainga	4702	Onslow-Western Ward	47	Wellington City	09	Wellington Region	2.66031e+06	5.99378e+06	1	2091400	1	855	40	1
1726900	123	557000	Spriggens Park	3702	Urban Ward	37	Wanganui District	08	Manawatu-Wanganui Region	2.68435e+06	6.13852e+06	1	1726900	9	1074	55	3
415700	72	514000	Freemans Bay	701	Western Bays Ward	7	Auckland City	02	Auckland Region	2.66605e+06	6.48178e+06	1	415700	2	907	24	1
2906700	96	604010	Roslyn North	7104	Hills Ward	71	Dunedin City	14	Otago Region	2.31535e+06	5.48005e+06	1	2906700	3	932	32	1
2906100	129	604010	Roslyn North	7104	Hills Ward	71	Dunedin City	14	Otago Region	2.31549e+06	5.47947e+06	1	2906100	2	910	43	1
1465300	24	545762	Longlands South	3003	Heretaunga Ward	30	Hastings District	06	Hawke's Bay Region	2.83942e+06	6.16248e+06	1	1465300	2	917	8	1
547400	153	518201	Balmoral	703	Eden-Albert Ward	7	Auckland City	02	Auckland Region	2.66696e+06	6.47878e+06	1	547400	4	936	54	2
546800	204	518102	Sherbourne	703	Eden-Albert Ward	7	Auckland City	02	Auckland Region	2.66714e+06	6.47909e+06	1	546800	6	978	71	2
678802	39	522603	Bleakhouse	806	Howick Ward	8	Manukau City	02	Auckland Region	2.68201e+06	6.47759e+06	1	678802	1	891	13	1
2121000	159	572900	Thorndon-Tinakori Road	4703	Lambton Ward	47	Wellington City	09	Wellington Region	2.65859e+06	5.99101e+06	1	2121000	3	926	52	1
2120500	99	572900	Thorndon-Tinakori Road	4703	Lambton Ward	47	Wellington City	09	Wellington Region	2.65894e+06	5.99136e+06	1	2120500	3	927	33	1
1727100	30	557000	Spriggens Park	3702	Urban Ward	37	Wanganui District	08	Manawatu-Wanganui Region	2.68459e+06	6.13844e+06	1	1727100	9	1131	14	3
2906200	66	604010	Roslyn North	7104	Hills Ward	71	Dunedin City	14	Otago Region	2.31532e+06	5.47956e+06	1	2906200	1	890	22	1
2513800	87	590400	Belfast	6001	Shirley-Papanui Ward	60	Christchurch City	13	Canterbury Region	2.4797e+06	5.74983e+06	1	2513800	4	937	30	2
2513506	90	590400	Belfast	6001	Shirley-Papanui Ward	60	Christchurch City	13	Canterbury Region	2.47987e+06	5.75003e+06	1	2513506	2	905	30	1
2775202	123	599200	Glenwood	6404	Timaru Ward	64	Timaru District	13	Canterbury Region	2.36756e+06	5.6453e+06	1	2775202	8	1064	55	3
2775402	204	599200	Glenwood	6404	Timaru Ward	64	Timaru District	13	Canterbury Region	2.36721e+06	5.64534e+06	1	2775402	6	977	71	2
1727000	87	557000	Spriggens Park	3702	Urban Ward	37	Wanganui District	08	Manawatu-Wanganui Region	2.68468e+06	6.13882e+06	1	1727000	8	1071	39	3
2906800	72	604010	Roslyn North	7104	Hills Ward	71	Dunedin City	14	Otago Region	2.31528e+06	5.47994e+06	1	2906800	3	932	24	1
416500	48	514000	Freemans Bay	701	Western Bays Ward	7	Auckland City	02	Auckland Region	2.6664e+06	6.48204e+06	1	416500	2	916	16	1
964900	63	527503	Cambridge Central	1702	Cambridge Ward	17	Waipa District	03	Waikato Region	2.7272e+06	6.36466e+06	1	964900	6	985	22	2
2119600	36	572900	Thorndon-Tinakori Road	4703	Lambton Ward	47	Wellington City	09	Wellington Region	2.65889e+06	5.99096e+06	1	2119600	6	977	13	2
416800	48	514000	Freemans Bay	701	Western Bays Ward	7	Auckland City	02	Auckland Region	2.66669e+06	6.48198e+06	1	416800	2	900	16	1
415500	78	514000	Freemans Bay	701	Western Bays Ward	7	Auckland City	02	Auckland Region	2.66601e+06	6.48216e+06	1	415500	3	920	26	1
2906400	117	604010	Roslyn North	7104	Hills Ward	71	Dunedin City	14	Otago Region	2.31539e+06	5.47935e+06	1	2906400	3	922	39	1
2514000	33	590400	Belfast	6001	Shirley-Papanui Ward	60	Christchurch City	13	Canterbury Region	2.48053e+06	5.75174e+06	1	2514000	4	937	12	2
2906900	90	604010	Roslyn North	7104	Hills Ward	71	Dunedin City	14	Otago Region	2.31513e+06	5.47981e+06	1	2906900	4	949	31	2
546900	96	518102	Sherbourne	703	Eden-Albert Ward	7	Auckland City	02	Auckland Region	2.66708e+06	6.4789e+06	1	546900	4	944	34	2
417100	51	514000	Freemans Bay	701	Western Bays Ward	7	Auckland City	02	Auckland Region	2.66661e+06	6.48188e+06	1	417100	6	975	18	2
547200	111	518102	Sherbourne	703	Eden-Albert Ward	7	Auckland City	02	Auckland Region	2.66734e+06	6.47871e+06	1	547200	6	981	39	2
1596200	12	552001	Mount Bryan	3301	New Plymouth City Ward	33	New Plymouth District	07	Taranaki Region	2.60446e+06	6.23857e+06	1	1596200	5	967	4	2
1595900	66	552001	Mount Bryan	3301	New Plymouth City Ward	33	New Plymouth District	07	Taranaki Region	2.60385e+06	6.2386e+06	1	1595900	5	958	23	2
1595700	57	552001	Mount Bryan	3301	New Plymouth City Ward	33	New Plymouth District	07	Taranaki Region	2.60355e+06	6.23858e+06	1	1595700	7	1007	20	2
2120700	126	572900	Thorndon-Tinakori Road	4703	Lambton Ward	47	Wellington City	09	Wellington Region	2.65875e+06	5.99123e+06	1	2120700	6	985	44	2
2645300	111	595400	Somerfield	6006	Spreydon-Heathcote Ward	60	Christchurch City	13	Canterbury Region	2.47987e+06	5.73895e+06	1	2645300	7	1029	39	2
546600	93	518102	Sherbourne	703	Eden-Albert Ward	7	Auckland City	02	Auckland Region	2.66746e+06	6.47901e+06	1	546600	6	989	33	2
2644300	129	595000	Spreydon	6006	Spreydon-Heathcote Ward	60	Christchurch City	13	Canterbury Region	2.47956e+06	5.73926e+06	1	2644300	5	962	45	2
2644800	135	595000	Spreydon	6006	Spreydon-Heathcote Ward	60	Christchurch City	13	Canterbury Region	2.47984e+06	5.73959e+06	1	2644800	8	1064	61	3
1726800	45	557000	Spriggens Park	3702	Urban Ward	37	Wanganui District	08	Manawatu-Wanganui Region	2.68408e+06	6.1387e+06	1	1726800	9	1074	20	3
1726600	138	556200	Gonville South	3702	Urban Ward	37	Wanganui District	08	Manawatu-Wanganui Region	2.68432e+06	6.13807e+06	1	1726600	8	1030	62	3
1726400	126	556200	Gonville South	3702	Urban Ward	37	Wanganui District	08	Manawatu-Wanganui Region	2.68386e+06	6.13802e+06	1	1726400	7	1010	44	2
2775201	102	599200	Glenwood	6404	Timaru Ward	64	Timaru District	13	Canterbury Region	2.36758e+06	5.64503e+06	1	2775201	8	1064	46	3
2774903	90	599300	Gleniti	6404	Timaru Ward	64	Timaru District	13	Canterbury Region	2.36638e+06	5.64503e+06	1	2774903	4	951	31	2
2774904	57	599300	Gleniti	6404	Timaru Ward	64	Timaru District	13	Canterbury Region	2.36665e+06	5.64504e+06	1	2774904	4	951	20	2
2774902	126	599300	Gleniti	6404	Timaru Ward	64	Timaru District	13	Canterbury Region	2.3668e+06	5.64498e+06	1	2774902	5	958	44	2
2513200	342	590400	Belfast	6001	Shirley-Papanui Ward	60	Christchurch City	13	Canterbury Region	2.48027e+06	5.75093e+06	1	2513200	6	996	120	2
2907300	108	604010	Roslyn North	7104	Hills Ward	71	Dunedin City	14	Otago Region	2.31495e+06	5.47965e+06	1	2907300	6	984	38	2
2905800	45	604010	Roslyn North	7104	Hills Ward	71	Dunedin City	14	Otago Region	2.31555e+06	5.47976e+06	1	2905800	1	861	15	1
416400	78	514000	Freemans Bay	701	Western Bays Ward	7	Auckland City	02	Auckland Region	2.66625e+06	6.48195e+06	1	416400	2	916	26	1
678501	222	522603	Bleakhouse	806	Howick Ward	8	Manukau City	02	Auckland Region	2.68166e+06	6.478e+06	1	678501	1	896	73	1
547001	102	518102	Sherbourne	703	Eden-Albert Ward	7	Auckland City	02	Auckland Region	2.66724e+06	6.47892e+06	1	547001	7	1000	36	2
2120200	30	572900	Thorndon-Tinakori Road	4703	Lambton Ward	47	Wellington City	09	Wellington Region	2.65895e+06	5.99159e+06	1	2120200	5	962	10	2
419300	30	515500	Arch Hill	701	Western Bays Ward	7	Auckland City	02	Auckland Region	2.66598e+06	6.48009e+06	1	419300	3	918	10	1
1468400	93	545762	Longlands South	3003	Heretaunga Ward	30	Hastings District	06	Hawke's Bay Region	2.83919e+06	6.1635e+06	1	1468400	2	904	31	1
550400	99	518202	Mt Eden East	703	Eden-Albert Ward	7	Auckland City	02	Auckland Region	2.66727e+06	6.4783e+06	1	550400	5	959	35	2
681338	150	522722	Aberfeldy	806	Howick Ward	8	Manukau City	02	Auckland Region	2.68043e+06	6.4751e+06	1	681338	4	949	52	2
2516900	171	589000	Wairarapa	6002	Fendalton-Waimairi Ward	60	Christchurch City	13	Canterbury Region	2.47626e+06	5.74524e+06	1	2516900	4	939	60	2
419400	129	515500	Arch Hill	701	Western Bays Ward	7	Auckland City	02	Auckland Region	2.66609e+06	6.48016e+06	1	419400	3	920	43	1
681329	159	522722	Aberfeldy	806	Howick Ward	8	Manukau City	02	Auckland Region	2.68054e+06	6.47593e+06	1	681329	7	1017	56	2
287100	126	511100	Glen Eden East	604	New Lynn Ward	6	Waitakere City	02	Auckland Region	2.65848e+06	6.47491e+06	1	287100	7	1003	44	2
286100	156	511100	Glen Eden East	604	New Lynn Ward	6	Waitakere City	02	Auckland Region	2.65795e+06	6.47537e+06	1	286100	8	1038	70	3
549600	66	518201	Balmoral	703	Eden-Albert Ward	7	Auckland City	02	Auckland Region	2.6669e+06	6.47829e+06	1	549600	5	954	23	2
1598102	45	552100	Fitzroy	3301	New Plymouth City Ward	33	New Plymouth District	07	Taranaki Region	2.6051e+06	6.23826e+06	1	1598102	5	961	16	2
1597000	75	552100	Fitzroy	3301	New Plymouth City Ward	33	New Plymouth District	07	Taranaki Region	2.60475e+06	6.23881e+06	1	1597000	3	931	25	1
2646300	159	595400	Somerfield	6006	Spreydon-Heathcote Ward	60	Christchurch City	13	Canterbury Region	2.48007e+06	5.7388e+06	1	2646300	4	947	56	2
286700	261	511100	Glen Eden East	604	New Lynn Ward	6	Waitakere City	02	Auckland Region	2.65798e+06	6.47517e+06	1	286700	10	1144	117	3
2908500	72	604020	Roslyn South	7104	Hills Ward	71	Dunedin City	14	Otago Region	2.31447e+06	5.47895e+06	1	2908500	2	908	24	1
1465801	57	545852	Pakipaki	3009	Poukawa Ward	30	Hastings District	06	Hawke's Bay Region	2.83654e+06	6.16142e+06	1	1465801	7	1010	20	2
1466502	231	548831	Te Mata	3008	Havelock North Ward	30	Hastings District	06	Hawke's Bay Region	2.84476e+06	6.16344e+06	1	1466502	1	896	76	1
1466413	78	548831	Te Mata	3008	Havelock North Ward	30	Hastings District	06	Hawke's Bay Region	2.84442e+06	6.1635e+06	1	1466413	1	881	26	1
417300	33	514000	Freemans Bay	701	Western Bays Ward	7	Auckland City	02	Auckland Region	2.66674e+06	6.48177e+06	1	417300	6	975	12	2
1597300	132	552100	Fitzroy	3301	New Plymouth City Ward	33	New Plymouth District	07	Taranaki Region	2.60516e+06	6.2387e+06	1	1597300	7	1026	46	2
1597100	45	552100	Fitzroy	3301	New Plymouth City Ward	33	New Plymouth District	07	Taranaki Region	2.60458e+06	6.23869e+06	1	1597100	3	931	15	1
418500	18	515500	Arch Hill	701	Western Bays Ward	7	Auckland City	02	Auckland Region	2.66619e+06	6.48017e+06	1	418500	5	966	6	2
2908200	90	604020	Roslyn South	7104	Hills Ward	71	Dunedin City	14	Otago Region	2.31485e+06	5.47931e+06	1	2908200	7	1026	31	2
2907900	90	604020	Roslyn South	7104	Hills Ward	71	Dunedin City	14	Otago Region	2.31457e+06	5.47932e+06	1	2907900	8	1057	40	3
1466707	162	548833	Te Mata Hills	3008	Havelock North Ward	30	Hastings District	06	Hawke's Bay Region	2.84456e+06	6.16308e+06	1	1466707	1	897	53	1
2121200	144	572900	Thorndon-Tinakori Road	4703	Lambton Ward	47	Wellington City	09	Wellington Region	2.65902e+06	5.99082e+06	1	2121200	7	1009	50	2
1597500	36	552100	Fitzroy	3301	New Plymouth City Ward	33	New Plymouth District	07	Taranaki Region	2.60513e+06	6.23855e+06	1	1597500	4	941	13	2
1597700	66	552100	Fitzroy	3301	New Plymouth City Ward	33	New Plymouth District	07	Taranaki Region	2.6047e+06	6.2385e+06	1	1597700	5	958	23	2
286600	252	511100	Glen Eden East	604	New Lynn Ward	6	Waitakere City	02	Auckland Region	2.65783e+06	6.47502e+06	1	286600	6	990	88	2
2908100	114	604020	Roslyn South	7104	Hills Ward	71	Dunedin City	14	Otago Region	2.3146e+06	5.47919e+06	1	2908100	4	952	40	2
2514900	48	590400	Belfast	6001	Shirley-Papanui Ward	60	Christchurch City	13	Canterbury Region	2.4798e+06	5.75057e+06	1	2514900	7	1005	17	2
2515000	135	590400	Belfast	6001	Shirley-Papanui Ward	60	Christchurch City	13	Canterbury Region	2.47965e+06	5.7505e+06	1	2515000	5	955	47	2
2515105	105	590400	Belfast	6001	Shirley-Papanui Ward	60	Christchurch City	13	Canterbury Region	2.47939e+06	5.75046e+06	1	2515105	4	938	37	2
2515110	138	590400	Belfast	6001	Shirley-Papanui Ward	60	Christchurch City	13	Canterbury Region	2.47914e+06	5.75041e+06	1	2515110	4	935	48	2
681332	72	522722	Aberfeldy	806	Howick Ward	8	Manukau City	02	Auckland Region	2.68022e+06	6.475e+06	1	681332	5	967	25	2
1466706	204	548833	Te Mata Hills	3008	Havelock North Ward	30	Hastings District	06	Hawke's Bay Region	2.84454e+06	6.16286e+06	1	1466706	1	860	67	1
1466705	195	548832	Havelock North Central	3008	Havelock North Ward	30	Hastings District	06	Hawke's Bay Region	2.84427e+06	6.16291e+06	1	1466705	2	910	64	1
418400	90	515500	Arch Hill	701	Western Bays Ward	7	Auckland City	02	Auckland Region	2.66625e+06	6.48026e+06	1	418400	5	966	31	2
1466600	93	545750	Brookvale	3004	Clive Ward	30	Hastings District	06	Hawke's Bay Region	2.84597e+06	6.16456e+06	1	1466600	5	957	33	2
417600	153	515500	Arch Hill	701	Western Bays Ward	7	Auckland City	02	Auckland Region	2.6667e+06	6.4808e+06	1	417600	5	967	54	2
1598101	126	552100	Fitzroy	3301	New Plymouth City Ward	33	New Plymouth District	07	Taranaki Region	2.605e+06	6.23836e+06	1	1598101	5	961	44	2
1597900	36	552100	Fitzroy	3301	New Plymouth City Ward	33	New Plymouth District	07	Taranaki Region	2.60514e+06	6.2384e+06	1	1597900	4	944	13	2
2645400	45	595400	Somerfield	6006	Spreydon-Heathcote Ward	60	Christchurch City	13	Canterbury Region	2.47999e+06	5.73893e+06	1	2645400	7	1029	16	2
2645800	159	595400	Somerfield	6006	Spreydon-Heathcote Ward	60	Christchurch City	13	Canterbury Region	2.48015e+06	5.73918e+06	1	2645800	2	912	52	1
2908900	63	604020	Roslyn South	7104	Hills Ward	71	Dunedin City	14	Otago Region	2.31412e+06	5.47869e+06	1	2908900	1	884	21	1
2515109	36	588401	Belfast South	6001	Shirley-Papanui Ward	60	Christchurch City	13	Canterbury Region	2.47918e+06	5.75012e+06	1	2515109	2	914	12	1
2515112	147	588401	Belfast South	6001	Shirley-Papanui Ward	60	Christchurch City	13	Canterbury Region	2.47874e+06	5.74998e+06	1	2515112	1	884	49	1
2515111	36	588401	Belfast South	6001	Shirley-Papanui Ward	60	Christchurch City	13	Canterbury Region	2.47897e+06	5.75022e+06	1	2515111	4	935	13	2
2907700	39	604010	Roslyn North	7104	Hills Ward	71	Dunedin City	14	Otago Region	2.31512e+06	5.47951e+06	1	2907700	3	920	13	1
417800	15	515500	Arch Hill	701	Western Bays Ward	7	Auckland City	02	Auckland Region	2.66645e+06	6.48065e+06	1	417800	6	979	5	2
286900	276	511100	Glen Eden East	604	New Lynn Ward	6	Waitakere City	02	Auckland Region	2.65846e+06	6.47516e+06	1	286900	9	1078	124	3
2907600	96	604010	Roslyn North	7104	Hills Ward	71	Dunedin City	14	Otago Region	2.31496e+06	5.47951e+06	1	2907600	4	951	34	2
2908600	102	604020	Roslyn South	7104	Hills Ward	71	Dunedin City	14	Otago Region	2.31409e+06	5.47883e+06	1	2908600	4	939	36	2
1466501	69	545750	Brookvale	3004	Clive Ward	30	Hastings District	06	Hawke's Bay Region	2.84528e+06	6.16411e+06	1	1466501	5	957	24	2
681324	186	522722	Aberfeldy	806	Howick Ward	8	Manukau City	02	Auckland Region	2.68023e+06	6.47604e+06	1	681324	7	1029	65	2
2122400	63	572900	Thorndon-Tinakori Road	4703	Lambton Ward	47	Wellington City	09	Wellington Region	2.65862e+06	5.99066e+06	1	2122400	4	947	22	2
1597200	135	552100	Fitzroy	3301	New Plymouth City Ward	33	New Plymouth District	07	Taranaki Region	2.60505e+06	6.23888e+06	1	1597200	5	970	47	2
2645500	165	595400	Somerfield	6006	Spreydon-Heathcote Ward	60	Christchurch City	13	Canterbury Region	2.47954e+06	5.73862e+06	1	2645500	5	972	58	2
2645900	186	595400	Somerfield	6006	Spreydon-Heathcote Ward	60	Christchurch City	13	Canterbury Region	2.48022e+06	5.73908e+06	1	2645900	5	964	65	2
680601	204	522712	Murvale	806	Howick Ward	8	Manukau City	02	Auckland Region	2.68145e+06	6.47761e+06	1	680601	3	928	67	1
2907800	30	603910	Wakari	7104	Hills Ward	71	Dunedin City	14	Otago Region	2.31454e+06	5.47944e+06	1	2907800	8	1057	14	3
2514700	504	590400	Belfast	6001	Shirley-Papanui Ward	60	Christchurch City	13	Canterbury Region	2.48031e+06	5.7517e+06	1	2514700	4	939	176	2
418000	57	515500	Arch Hill	701	Western Bays Ward	7	Auckland City	02	Auckland Region	2.66643e+06	6.48052e+06	1	418000	6	979	20	2
1466414	60	548831	Te Mata	3008	Havelock North Ward	30	Hastings District	06	Hawke's Bay Region	2.84466e+06	6.16342e+06	1	1466414	1	886	20	1
2121700	81	572900	Thorndon-Tinakori Road	4703	Lambton Ward	47	Wellington City	09	Wellington Region	2.65832e+06	5.99056e+06	1	2121700	4	943	28	2
2121100	30	572900	Thorndon-Tinakori Road	4703	Lambton Ward	47	Wellington City	09	Wellington Region	2.65885e+06	5.99086e+06	1	2121100	7	1009	10	2
1597800	57	552100	Fitzroy	3301	New Plymouth City Ward	33	New Plymouth District	07	Taranaki Region	2.60479e+06	6.23853e+06	1	1597800	5	958	20	2
1597400	123	552100	Fitzroy	3301	New Plymouth City Ward	33	New Plymouth District	07	Taranaki Region	2.60496e+06	6.23864e+06	1	1597400	4	941	43	2
1597600	30	552100	Fitzroy	3301	New Plymouth City Ward	33	New Plymouth District	07	Taranaki Region	2.60525e+06	6.23858e+06	1	1597600	4	941	10	2
2646000	135	595400	Somerfield	6006	Spreydon-Heathcote Ward	60	Christchurch City	13	Canterbury Region	2.48029e+06	5.73899e+06	1	2646000	5	965	47	2
2777500	24	598313	Levels	6404	Timaru Ward	64	Timaru District	13	Canterbury Region	2.36681e+06	5.63496e+06	1	2777500	2	906	8	1
2645700	144	595400	Somerfield	6006	Spreydon-Heathcote Ward	60	Christchurch City	13	Canterbury Region	2.48006e+06	5.73926e+06	1	2645700	7	1005	50	2
287400	189	511100	Glen Eden East	604	New Lynn Ward	6	Waitakere City	02	Auckland Region	2.6582e+06	6.47459e+06	1	287400	3	920	62	1
2908800	102	604020	Roslyn South	7104	Hills Ward	71	Dunedin City	14	Otago Region	2.31426e+06	5.47875e+06	1	2908800	2	908	34	1
2514400	204	590400	Belfast	6001	Shirley-Papanui Ward	60	Christchurch City	13	Canterbury Region	2.48034e+06	5.75117e+06	1	2514400	8	1046	92	3
2514602	102	590400	Belfast	6001	Shirley-Papanui Ward	60	Christchurch City	13	Canterbury Region	2.48007e+06	5.75099e+06	1	2514602	7	1005	36	2
2908000	99	604020	Roslyn South	7104	Hills Ward	71	Dunedin City	14	Otago Region	2.31438e+06	5.47924e+06	1	2908000	5	968	35	2
417500	30	515500	Arch Hill	701	Western Bays Ward	7	Auckland City	02	Auckland Region	2.66665e+06	6.4808e+06	1	417500	6	979	10	2
287200	168	511100	Glen Eden East	604	New Lynn Ward	6	Waitakere City	02	Auckland Region	2.65822e+06	6.47503e+06	1	287200	7	1017	59	2
418200	72	515500	Arch Hill	701	Western Bays Ward	7	Auckland City	02	Auckland Region	2.66605e+06	6.48026e+06	1	418200	3	922	24	1
287300	132	511100	Glen Eden East	604	New Lynn Ward	6	Waitakere City	02	Auckland Region	2.65824e+06	6.47483e+06	1	287300	3	925	44	1
2121800	48	572900	Thorndon-Tinakori Road	4703	Lambton Ward	47	Wellington City	09	Wellington Region	2.6583e+06	5.9905e+06	1	2121800	4	943	17	2
417900	15	515500	Arch Hill	701	Western Bays Ward	7	Auckland City	02	Auckland Region	2.66648e+06	6.48055e+06	1	417900	6	979	5	2
418300	96	515500	Arch Hill	701	Western Bays Ward	7	Auckland City	02	Auckland Region	2.66618e+06	6.48035e+06	1	418300	3	922	32	1
289100	192	512100	Green Bay	604	New Lynn Ward	6	Waitakere City	02	Auckland Region	2.66078e+06	6.47326e+06	1	289100	6	986	67	2
420100	78	515600	Eden Terrace	704	Hobson Ward	7	Auckland City	02	Auckland Region	2.66678e+06	6.48049e+06	1	420100	9	1092	35	3
2780800	117	599000	Maori Park	6404	Timaru Ward	64	Timaru District	13	Canterbury Region	2.36992e+06	5.64492e+06	1	2780800	5	973	41	2
2780900	69	599000	Maori Park	6404	Timaru Ward	64	Timaru District	13	Canterbury Region	2.37013e+06	5.64489e+06	1	2780900	8	1056	31	3
290600	192	512100	Green Bay	604	New Lynn Ward	6	Waitakere City	02	Auckland Region	2.65954e+06	6.47285e+06	1	290600	3	920	63	1
421500	66	515201	Herne Bay	701	Western Bays Ward	7	Auckland City	02	Auckland Region	2.66443e+06	6.48255e+06	1	421500	1	886	22	1
1469100	33	545761	Irongate	3003	Heretaunga Ward	30	Hastings District	06	Hawke's Bay Region	2.83833e+06	6.16527e+06	1	1469100	4	943	12	2
1469301	3	545761	Irongate	3005	Hastings Ward	30	Hastings District	06	Hawke's Bay Region	2.83854e+06	6.16575e+06	1	1469301	3	921	1	1
1468902	36	545761	Irongate	3003	Heretaunga Ward	30	Hastings District	06	Hawke's Bay Region	2.83701e+06	6.16555e+06	1	1468902	4	938	13	2
289901	66	512100	Green Bay	604	New Lynn Ward	6	Waitakere City	02	Auckland Region	2.65964e+06	6.47342e+06	1	289901	6	993	23	2
2125300	3	573000	Lambton	4703	Lambton Ward	47	Wellington City	09	Wellington Region	2.65883e+06	5.99008e+06	1	2125300	8	1047	1	3
420200	162	515600	Eden Terrace	704	Hobson Ward	7	Auckland City	02	Auckland Region	2.66696e+06	6.48051e+06	1	420200	3	932	53	1
2124700	3	573000	Lambton	4703	Lambton Ward	47	Wellington City	09	Wellington Region	2.65864e+06	5.99009e+06	1	2124700	5	970	1	2
2124900	261	573000	Lambton	4703	Lambton Ward	47	Wellington City	09	Wellington Region	2.65843e+06	5.98995e+06	1	2124900	10	1144	117	3
419900	126	515600	Eden Terrace	704	Hobson Ward	7	Auckland City	02	Auckland Region	2.66673e+06	6.48035e+06	1	419900	6	987	44	2
2780100	60	599000	Maori Park	6404	Timaru Ward	64	Timaru District	13	Canterbury Region	2.37008e+06	5.64551e+06	1	2780100	4	946	21	2
419701	171	515600	Eden Terrace	704	Hobson Ward	7	Auckland City	02	Auckland Region	2.66694e+06	6.48004e+06	1	419701	7	1019	60	2
2647600	144	591500	Cathedral Square	6005	Hagley-Ferrymead Ward	60	Christchurch City	13	Canterbury Region	2.47934e+06	5.74086e+06	1	2647600	6	994	50	2
2647700	93	591500	Cathedral Square	6005	Hagley-Ferrymead Ward	60	Christchurch City	13	Canterbury Region	2.47952e+06	5.74087e+06	1	2647700	6	994	33	2
290000	204	512100	Green Bay	604	New Lynn Ward	6	Waitakere City	02	Auckland Region	2.65977e+06	6.47357e+06	1	290000	4	945	71	2
290400	147	512100	Green Bay	604	New Lynn Ward	6	Waitakere City	02	Auckland Region	2.6597e+06	6.47306e+06	1	290400	4	938	51	2
420700	30	515600	Eden Terrace	704	Hobson Ward	7	Auckland City	02	Auckland Region	2.66707e+06	6.48035e+06	1	420700	7	1006	10	2
1469000	99	545761	Irongate	3003	Heretaunga Ward	30	Hastings District	06	Hawke's Bay Region	2.83772e+06	6.16501e+06	1	1469000	4	943	35	2
287806	36	511100	Glen Eden East	604	New Lynn Ward	6	Waitakere City	02	Auckland Region	2.65807e+06	6.47456e+06	1	287806	5	966	13	2
681326	123	522722	Aberfeldy	806	Howick Ward	8	Manukau City	02	Auckland Region	2.6803e+06	6.47587e+06	1	681326	6	993	43	2
681600	213	522723	Elsmore Park	803	Pakuranga Ward	8	Manukau City	02	Auckland Region	2.67908e+06	6.47566e+06	1	681600	7	1014	75	2
2516601	150	589100	Jellie Park	6002	Fendalton-Waimairi Ward	60	Christchurch City	13	Canterbury Region	2.47593e+06	5.74385e+06	1	2516601	2	912	50	1
419600	129	515600	Eden Terrace	704	Hobson Ward	7	Auckland City	02	Auckland Region	2.66665e+06	6.48027e+06	1	419600	5	956	45	2
418600	81	515500	Arch Hill	701	Western Bays Ward	7	Auckland City	02	Auckland Region	2.66631e+06	6.48039e+06	1	418600	4	951	28	2
681334	120	522722	Aberfeldy	806	Howick Ward	8	Manukau City	02	Auckland Region	2.68026e+06	6.47467e+06	1	681334	3	919	40	1
2123200	78	572900	Thorndon-Tinakori Road	4703	Lambton Ward	47	Wellington City	09	Wellington Region	2.65826e+06	5.99064e+06	1	2123200	5	967	27	2
2123900	237	573000	Lambton	4703	Lambton Ward	47	Wellington City	09	Wellington Region	2.6586e+06	5.99031e+06	1	2123900	10	1246	107	3
681311	225	522722	Aberfeldy	806	Howick Ward	8	Manukau City	02	Auckland Region	2.68093e+06	6.47601e+06	1	681311	4	953	79	2
2122900	99	572900	Thorndon-Tinakori Road	4703	Lambton Ward	47	Wellington City	09	Wellington Region	2.65852e+06	5.99095e+06	1	2122900	4	941	35	2
1599400	78	552100	Fitzroy	3301	New Plymouth City Ward	33	New Plymouth District	07	Taranaki Region	2.60558e+06	6.23902e+06	1	1599400	7	1023	27	2
1599500	51	552100	Fitzroy	3301	New Plymouth City Ward	33	New Plymouth District	07	Taranaki Region	2.60537e+06	6.23896e+06	1	1599500	5	955	18	2
681317	261	522722	Aberfeldy	806	Howick Ward	8	Manukau City	02	Auckland Region	2.68041e+06	6.47555e+06	1	681317	5	962	91	2
419000	78	515500	Arch Hill	701	Western Bays Ward	7	Auckland City	02	Auckland Region	2.66586e+06	6.48019e+06	1	419000	3	918	26	1
2210800	93	577500	Seatoun	4704	Eastern Ward	47	Wellington City	09	Wellington Region	2.66336e+06	5.98561e+06	1	2210800	1	894	31	1
681318	156	522722	Aberfeldy	806	Howick Ward	8	Manukau City	02	Auckland Region	2.6806e+06	6.47555e+06	1	681318	3	925	51	1
681337	201	522722	Aberfeldy	806	Howick Ward	8	Manukau City	02	Auckland Region	2.68034e+06	6.4751e+06	1	681337	6	981	70	2
420000	84	515600	Eden Terrace	704	Hobson Ward	7	Auckland City	02	Auckland Region	2.66667e+06	6.48043e+06	1	420000	9	1092	38	3
681303	207	522722	Aberfeldy	806	Howick Ward	8	Manukau City	02	Auckland Region	2.68078e+06	6.47581e+06	1	681303	5	967	72	2
681202	267	522721	Pigeon Mountain South	803	Pakuranga Ward	8	Manukau City	02	Auckland Region	2.6791e+06	6.47589e+06	1	681202	5	965	93	2
2123400	81	572900	Thorndon-Tinakori Road	4703	Lambton Ward	47	Wellington City	09	Wellington Region	2.65814e+06	5.99055e+06	1	2123400	4	949	28	2
681700	198	522723	Elsmore Park	803	Pakuranga Ward	8	Manukau City	02	Auckland Region	2.6792e+06	6.47556e+06	1	681700	3	930	65	1
1599700	15	552100	Fitzroy	3301	New Plymouth City Ward	33	New Plymouth District	07	Taranaki Region	2.60561e+06	6.23877e+06	1	1599700	5	955	5	2
550300	189	518202	Mt Eden East	703	Eden-Albert Ward	7	Auckland City	02	Auckland Region	2.66705e+06	6.47837e+06	1	550300	4	947	66	2
551000	153	518202	Mt Eden East	703	Eden-Albert Ward	7	Auckland City	02	Auckland Region	2.66725e+06	6.47808e+06	1	551000	5	971	54	2
551100	210	518202	Mt Eden East	703	Eden-Albert Ward	7	Auckland City	02	Auckland Region	2.66703e+06	6.47796e+06	1	551100	2	916	69	1
287803	126	511100	Glen Eden East	604	New Lynn Ward	6	Waitakere City	02	Auckland Region	2.65792e+06	6.47474e+06	1	287803	5	968	44	2
1424400	57	546801	Hospital Hill	3199	Area Outside Ward	31	Napier City	06	Hawke's Bay Region	2.84605e+06	6.18292e+06	1	1424400	7	1002	20	2
2648000	3	591500	Cathedral Square	6005	Hagley-Ferrymead Ward	60	Christchurch City	13	Canterbury Region	2.47978e+06	5.74086e+06	1	2648000	9	1108	1	3
681309	324	522722	Aberfeldy	806	Howick Ward	8	Manukau City	02	Auckland Region	2.68067e+06	6.4762e+06	1	681309	8	1032	146	3
681400	108	522723	Elsmore Park	803	Pakuranga Ward	8	Manukau City	02	Auckland Region	2.67938e+06	6.47555e+06	1	681400	3	927	36	1
288600	90	512100	Green Bay	604	New Lynn Ward	6	Waitakere City	02	Auckland Region	2.66018e+06	6.47365e+06	1	288600	3	934	30	1
549802	81	518202	Mt Eden East	703	Eden-Albert Ward	7	Auckland City	02	Auckland Region	2.66733e+06	6.47849e+06	1	549802	2	916	27	1
681323	54	522722	Aberfeldy	806	Howick Ward	8	Manukau City	02	Auckland Region	2.68049e+06	6.47482e+06	1	681323	3	930	18	1
1468200	102	545762	Longlands South	3003	Heretaunga Ward	30	Hastings District	06	Hawke's Bay Region	2.83816e+06	6.16422e+06	1	1468200	5	961	36	2
288202	78	511100	Glen Eden East	604	New Lynn Ward	6	Waitakere City	02	Auckland Region	2.65807e+06	6.47438e+06	1	288202	3	930	26	1
419200	78	515500	Arch Hill	701	Western Bays Ward	7	Auckland City	02	Auckland Region	2.66594e+06	6.48021e+06	1	419200	5	954	27	2
2516402	96	589100	Jellie Park	6002	Fendalton-Waimairi Ward	60	Christchurch City	13	Canterbury Region	2.47604e+06	5.74401e+06	1	2516402	4	936	34	2
681319	255	522722	Aberfeldy	806	Howick Ward	8	Manukau City	02	Auckland Region	2.68036e+06	6.47575e+06	1	681319	5	963	89	2
681331	57	522722	Aberfeldy	806	Howick Ward	8	Manukau City	02	Auckland Region	2.68016e+06	6.47494e+06	1	681331	3	930	19	1
2516403	177	589100	Jellie Park	6002	Fendalton-Waimairi Ward	60	Christchurch City	13	Canterbury Region	2.4761e+06	5.74408e+06	1	2516403	4	952	62	2
2517200	144	589000	Wairarapa	6002	Fendalton-Waimairi Ward	60	Christchurch City	13	Canterbury Region	2.47599e+06	5.74478e+06	1	2517200	9	1123	65	3
812900	123	521122	Kingseat	1002	Northern Ward	10	Franklin District	02	Auckland Region	2.67825e+06	6.44841e+06	1	812900	4	949	43	2
1598501	87	552100	Fitzroy	3301	New Plymouth City Ward	33	New Plymouth District	07	Taranaki Region	2.60543e+06	6.23836e+06	1	1598501	4	944	30	2
921900	159	530400	Bader	1603	South Ward	16	Hamilton City	03	Waikato Region	2.71134e+06	6.37478e+06	1	921900	10	1141	72	3
681312	135	522722	Aberfeldy	806	Howick Ward	8	Manukau City	02	Auckland Region	2.68108e+06	6.47592e+06	1	681312	3	927	45	1
288800	105	512100	Green Bay	604	New Lynn Ward	6	Waitakere City	02	Auckland Region	2.66014e+06	6.47313e+06	1	288800	5	963	37	2
550600	120	518202	Mt Eden East	703	Eden-Albert Ward	7	Auckland City	02	Auckland Region	2.66712e+06	6.47821e+06	1	550600	5	955	42	2
550500	129	518202	Mt Eden East	703	Eden-Albert Ward	7	Auckland City	02	Auckland Region	2.66753e+06	6.47823e+06	1	550500	1	893	43	1
288201	78	511100	Glen Eden East	604	New Lynn Ward	6	Waitakere City	02	Auckland Region	2.65794e+06	6.47431e+06	1	288201	3	930	26	1
682100	174	522723	Elsmore Park	803	Pakuranga Ward	8	Manukau City	02	Auckland Region	2.67921e+06	6.47517e+06	1	682100	5	961	61	2
2516700	156	589100	Jellie Park	6002	Fendalton-Waimairi Ward	60	Christchurch City	13	Canterbury Region	2.47582e+06	5.74371e+06	1	2516700	3	932	51	1
2516602	42	589100	Jellie Park	6002	Fendalton-Waimairi Ward	60	Christchurch City	13	Canterbury Region	2.47589e+06	5.74379e+06	1	2516602	2	912	14	1
288402	66	512100	Green Bay	604	New Lynn Ward	6	Waitakere City	02	Auckland Region	2.66004e+06	6.4735e+06	1	288402	6	978	23	2
812001	48	521121	Patumahoe	1002	Northern Ward	10	Franklin District	02	Auckland Region	2.67443e+06	6.44275e+06	1	812001	4	941	17	2
550100	165	518202	Mt Eden East	703	Eden-Albert Ward	7	Auckland City	02	Auckland Region	2.66727e+06	6.47841e+06	1	550100	5	964	58	2
2123700	66	573000	Lambton	4703	Lambton Ward	47	Wellington City	09	Wellington Region	2.65874e+06	5.99042e+06	1	2123700	5	970	23	2
2123600	69	572900	Thorndon-Tinakori Road	4703	Lambton Ward	47	Wellington City	09	Wellington Region	2.65803e+06	5.99045e+06	1	2123600	4	949	24	2
1598300	93	552100	Fitzroy	3301	New Plymouth City Ward	33	New Plymouth District	07	Taranaki Region	2.60534e+06	6.23832e+06	1	1598300	6	984	33	2
2910300	51	604221	Corstorphine West	7106	South Dunedin Ward	71	Dunedin City	14	Otago Region	2.31311e+06	5.47588e+06	1	2910300	9	1102	23	3
418900	69	515500	Arch Hill	701	Western Bays Ward	7	Auckland City	02	Auckland Region	2.66582e+06	6.48015e+06	1	418900	9	1080	31	3
1468300	96	545762	Longlands South	3003	Heretaunga Ward	30	Hastings District	06	Hawke's Bay Region	2.84163e+06	6.16383e+06	1	1468300	1	886	32	1
681321	120	522722	Aberfeldy	806	Howick Ward	8	Manukau City	02	Auckland Region	2.68012e+06	6.47559e+06	1	681321	5	965	42	2
681900	186	522723	Elsmore Park	803	Pakuranga Ward	8	Manukau City	02	Auckland Region	2.67907e+06	6.47542e+06	1	681900	7	1013	65	2
549801	54	518202	Mt Eden East	703	Eden-Albert Ward	7	Auckland City	02	Auckland Region	2.66719e+06	6.47862e+06	1	549801	2	916	18	1
2910400	36	604221	Corstorphine West	7106	South Dunedin Ward	71	Dunedin City	14	Otago Region	2.31308e+06	5.47582e+06	1	2910400	9	1102	16	3
550900	126	518202	Mt Eden East	703	Eden-Albert Ward	7	Auckland City	02	Auckland Region	2.66703e+06	6.47815e+06	1	550900	2	917	42	1
681325	147	522722	Aberfeldy	806	Howick Ward	8	Manukau City	02	Auckland Region	2.6804e+06	6.47606e+06	1	681325	7	1024	51	2
287700	108	511100	Glen Eden East	604	New Lynn Ward	6	Waitakere City	02	Auckland Region	2.65793e+06	6.47484e+06	1	287700	6	985	38	2
681335	108	522722	Aberfeldy	806	Howick Ward	8	Manukau City	02	Auckland Region	2.68014e+06	6.47519e+06	1	681335	4	940	38	2
682000	114	522723	Elsmore Park	803	Pakuranga Ward	8	Manukau City	02	Auckland Region	2.67911e+06	6.47513e+06	1	682000	4	941	40	2
812400	108	521121	Patumahoe	1001	Waiuku-Awhitu Ward	10	Franklin District	02	Auckland Region	2.67068e+06	6.4416e+06	1	812400	1	892	36	1
681333	75	522722	Aberfeldy	806	Howick Ward	8	Manukau City	02	Auckland Region	2.68031e+06	6.47498e+06	1	681333	5	967	26	2
2516200	204	589100	Jellie Park	6002	Fendalton-Waimairi Ward	60	Christchurch City	13	Canterbury Region	2.4764e+06	5.74484e+06	1	2516200	10	1157	92	3
812800	30	521122	Kingseat	1002	Northern Ward	10	Franklin District	02	Auckland Region	2.6778e+06	6.44983e+06	1	812800	1	898	10	1
2517100	162	589000	Wairarapa	6002	Fendalton-Waimairi Ward	60	Christchurch City	13	Canterbury Region	2.47635e+06	5.74503e+06	1	2517100	5	967	57	2
2516800	147	589000	Wairarapa	6002	Fendalton-Waimairi Ward	60	Christchurch City	13	Canterbury Region	2.47607e+06	5.74513e+06	1	2516800	2	907	49	1
2123000	105	572900	Thorndon-Tinakori Road	4703	Lambton Ward	47	Wellington City	09	Wellington Region	2.65847e+06	5.99089e+06	1	2123000	3	926	35	1
1599600	171	552100	Fitzroy	3301	New Plymouth City Ward	33	New Plymouth District	07	Taranaki Region	2.60541e+06	6.2388e+06	1	1599600	10	1216	77	3
419800	60	515600	Eden Terrace	704	Hobson Ward	7	Auckland City	02	Auckland Region	2.66687e+06	6.48018e+06	1	419800	6	987	21	2
681330	225	522722	Aberfeldy	806	Howick Ward	8	Manukau City	02	Auckland Region	2.68058e+06	6.47575e+06	1	681330	5	962	79	2
681336	45	522722	Aberfeldy	806	Howick Ward	8	Manukau City	02	Auckland Region	2.68021e+06	6.47525e+06	1	681336	4	940	16	2
418700	114	515500	Arch Hill	701	Western Bays Ward	7	Auckland City	02	Auckland Region	2.66638e+06	6.48046e+06	1	418700	4	951	40	2
418800	87	515500	Arch Hill	701	Western Bays Ward	7	Auckland City	02	Auckland Region	2.66564e+06	6.48018e+06	1	418800	9	1080	39	3
550700	105	518202	Mt Eden East	703	Eden-Albert Ward	7	Auckland City	02	Auckland Region	2.66749e+06	6.4781e+06	1	550700	1	881	35	1
288500	75	512100	Green Bay	604	New Lynn Ward	6	Waitakere City	02	Auckland Region	2.66013e+06	6.47357e+06	1	288500	6	978	26	2
681327	231	522722	Aberfeldy	806	Howick Ward	8	Manukau City	02	Auckland Region	2.68048e+06	6.47522e+06	1	681327	4	936	81	2
288900	132	512100	Green Bay	604	New Lynn Ward	6	Waitakere City	02	Auckland Region	2.6604e+06	6.47323e+06	1	288900	4	953	46	2
1468000	114	545762	Longlands South	3003	Heretaunga Ward	30	Hastings District	06	Hawke's Bay Region	2.83935e+06	6.16463e+06	1	1468000	2	904	38	1
1468500	120	545762	Longlands South	3003	Heretaunga Ward	30	Hastings District	06	Hawke's Bay Region	2.84073e+06	6.16483e+06	1	1468500	4	939	42	2
812100	90	521121	Patumahoe	1002	Northern Ward	10	Franklin District	02	Auckland Region	2.67463e+06	6.44164e+06	1	812100	4	941	31	2
2517000	99	589000	Wairarapa	6002	Fendalton-Waimairi Ward	60	Christchurch City	13	Canterbury Region	2.47628e+06	5.74509e+06	1	2517000	3	929	33	1
2123300	87	572900	Thorndon-Tinakori Road	4703	Lambton Ward	47	Wellington City	09	Wellington Region	2.6582e+06	5.99057e+06	1	2123300	5	967	30	2
419500	147	515600	Eden Terrace	703	Eden-Albert Ward	7	Auckland City	02	Auckland Region	2.6666e+06	6.48021e+06	1	419500	7	1007	51	2
813001	81	521122	Kingseat	1002	Northern Ward	10	Franklin District	02	Auckland Region	2.67784e+06	6.44863e+06	1	813001	6	978	28	2
1598401	30	552100	Fitzroy	3301	New Plymouth City Ward	33	New Plymouth District	07	Taranaki Region	2.6055e+06	6.23851e+06	1	1598401	4	944	10	2
550000	99	518202	Mt Eden East	703	Eden-Albert Ward	7	Auckland City	02	Auckland Region	2.66756e+06	6.47857e+06	1	550000	6	984	35	2
2909000	69	604020	Roslyn South	7104	Hills Ward	71	Dunedin City	14	Otago Region	2.31419e+06	5.47882e+06	1	2909000	1	884	23	1
419100	18	515500	Arch Hill	701	Western Bays Ward	7	Auckland City	02	Auckland Region	2.66592e+06	6.48006e+06	1	419100	3	918	6	1
550800	114	518202	Mt Eden East	703	Eden-Albert Ward	7	Auckland City	02	Auckland Region	2.66756e+06	6.47796e+06	1	550800	5	954	40	2
681310	147	522722	Aberfeldy	806	Howick Ward	8	Manukau City	02	Auckland Region	2.68093e+06	6.47618e+06	1	681310	8	1033	66	3
2648200	3	591500	Cathedral Square	6005	Hagley-Ferrymead Ward	60	Christchurch City	13	Canterbury Region	2.48004e+06	5.74132e+06	1	2648200	9	1108	1	3
288700	72	512100	Green Bay	604	New Lynn Ward	6	Waitakere City	02	Auckland Region	2.66011e+06	6.47334e+06	1	288700	3	934	24	1
1468600	120	545762	Longlands South	3003	Heretaunga Ward	30	Hastings District	06	Hawke's Bay Region	2.84091e+06	6.16394e+06	1	1468600	1	886	40	1
1468100	93	545762	Longlands South	3003	Heretaunga Ward	30	Hastings District	06	Hawke's Bay Region	2.83899e+06	6.16419e+06	1	1468100	5	961	33	2
2516500	105	589100	Jellie Park	6002	Fendalton-Waimairi Ward	60	Christchurch City	13	Canterbury Region	2.47572e+06	5.74398e+06	1	2516500	4	951	37	2
2123500	99	572900	Thorndon-Tinakori Road	4703	Lambton Ward	47	Wellington City	09	Wellington Region	2.65809e+06	5.99046e+06	1	2123500	4	936	35	2
681500	243	522723	Elsmore Park	803	Pakuranga Ward	8	Manukau City	02	Auckland Region	2.67978e+06	6.47491e+06	1	681500	5	954	85	2
549900	81	518202	Mt Eden East	703	Eden-Albert Ward	7	Auckland City	02	Auckland Region	2.66738e+06	6.47858e+06	1	549900	4	937	28	2
550200	150	518202	Mt Eden East	703	Eden-Albert Ward	7	Auckland City	02	Auckland Region	2.66755e+06	6.47843e+06	1	550200	2	910	50	1
2781700	96	598800	Waimataitai	6404	Timaru Ward	64	Timaru District	13	Canterbury Region	2.36982e+06	5.64593e+06	1	2781700	5	968	34	2
423100	72	515201	Herne Bay	701	Western Bays Ward	7	Auckland City	02	Auckland Region	2.66515e+06	6.48267e+06	1	423100	2	900	24	1
2126400	333	573000	Lambton	4703	Lambton Ward	47	Wellington City	09	Wellington Region	2.65856e+06	5.98981e+06	1	2126400	7	1012	117	2
1470313	126	548611	Kingsley-Chatham	3006	Flaxmere Ward	30	Hastings District	06	Hawke's Bay Region	2.8339e+06	6.16947e+06	1	1470313	10	1196	57	3
1471202	69	547800	Frimley	3003	Heretaunga Ward	30	Hastings District	06	Hawke's Bay Region	2.83847e+06	6.16911e+06	1	1471202	2	909	23	1
1471800	111	545721	Karamu	3003	Heretaunga Ward	30	Hastings District	06	Hawke's Bay Region	2.84268e+06	6.16853e+06	1	1471800	7	1023	39	2
1470314	195	548611	Kingsley-Chatham	3006	Flaxmere Ward	30	Hastings District	06	Hawke's Bay Region	2.83375e+06	6.16967e+06	1	1470314	10	1302	88	3
1471900	12	545721	Karamu	3003	Heretaunga Ward	30	Hastings District	06	Hawke's Bay Region	2.84302e+06	6.16934e+06	1	1471900	4	941	4	2
2520601	54	588800	Russley	6002	Fendalton-Waimairi Ward	60	Christchurch City	13	Canterbury Region	2.47424e+06	5.74564e+06	1	2520601	3	929	18	1
685300	105	522910	Pakuranga Central	803	Pakuranga Ward	8	Manukau City	02	Auckland Region	2.67786e+06	6.4748e+06	1	685300	3	924	35	1
685500	69	522910	Pakuranga Central	803	Pakuranga Ward	8	Manukau City	02	Auckland Region	2.6782e+06	6.47519e+06	1	685500	4	952	24	2
290702	156	512100	Green Bay	604	New Lynn Ward	6	Waitakere City	02	Auckland Region	2.65925e+06	6.47289e+06	1	290702	3	928	51	1
2651000	12	591500	Cathedral Square	6005	Hagley-Ferrymead Ward	60	Christchurch City	13	Canterbury Region	2.48051e+06	5.74172e+06	1	2651000	9	1077	5	3
684800	123	522920	Edgewater	803	Pakuranga Ward	8	Manukau City	02	Auckland Region	2.67715e+06	6.4744e+06	1	684800	7	1008	43	2
1468903	18	545842	Bridge Pa	3003	Heretaunga Ward	30	Hastings District	06	Hawke's Bay Region	2.83617e+06	6.1657e+06	1	1468903	4	938	6	2
1470205	6	545842	Bridge Pa	3003	Heretaunga Ward	30	Hastings District	06	Hawke's Bay Region	2.83606e+06	6.16591e+06	1	1470205	4	937	2	2
2518700	126	588900	Burnside	6002	Fendalton-Waimairi Ward	60	Christchurch City	13	Canterbury Region	2.47506e+06	5.74438e+06	1	2518700	1	880	42	1
2517900	144	589000	Wairarapa	6002	Fendalton-Waimairi Ward	60	Christchurch City	13	Canterbury Region	2.47538e+06	5.74411e+06	1	2517900	3	929	48	1
[truncated: 7,170 more rows]
