# Supplementary material for: Optimising locational access of deprived populations to farmers’ markets at a national scale: one route to improved fruit and vegetable consumption?
Source: PeerJ. 2013 Jul 2;1:e94. doi: 10.7717/peerj.94 (PMC3709110; doi:10.7717/peerj.94)
Supplement: Supplemental Information 6 [file peerj-01-94-s006.xlsx]

## Sheet: Pop_Scenario1_5kBuffer
MB2006	MBUR_POP20	CAU2006	CAU_DESCR	WARD_COD	WARD_DES	TA_CODE	TA_DESC	RC_COD	RC_DESC	POINT_X	POINT_Y	Cnt_MB2006	MB2006_1	NZDep2006	NZDep_scor	Weight	DepCat
2098000	75	574402	Ngaio	4702	Onslow-Western Ward	47	Wellington City	09	Wellington Region	2.65851e+06	5.99347e+06	1	2098000	1	879	25	1
2884800	132	603910	Wakari	7104	Hills Ward	71	Dunedin City	14	Otago Region	2.31416e+06	5.48004e+06	1	2884800	6	991	46	2
655500	135	521502	Cockle Bay	806	Howick Ward	8	Manukau City	02	Auckland Region	2.68425e+06	6.47569e+06	1	655500	1	887	45	1
1835800	117	562402	Papaeoia	4001	Papaioea Ward	40	Palmerston North City	08	Manawatu-Wanganui Region	2.73257e+06	6.0922e+06	1	1835800	6	983	41	2
1835600	171	562402	Papaeoia	4001	Papaioea Ward	40	Palmerston North City	08	Manawatu-Wanganui Region	2.73228e+06	6.09214e+06	1	1835600	5	956	60	2
2119200	45	572900	Thorndon-Tinakori Road	4703	Lambton Ward	47	Wellington City	09	Wellington Region	2.65901e+06	5.99091e+06	1	2119200	6	977	16	2
2098200	189	574402	Ngaio	4702	Onslow-Western Ward	47	Wellington City	09	Wellington Region	2.65853e+06	5.99321e+06	1	2098200	1	868	62	1
2774604	159	599300	Gleniti	6404	Timaru Ward	64	Timaru District	13	Canterbury Region	2.36634e+06	5.64545e+06	1	2774604	1	868	52	1
2884700	189	603910	Wakari	7104	Hills Ward	71	Dunedin City	14	Otago Region	2.31391e+06	5.47989e+06	1	2884700	3	934	62	1
1966700	42	569100	Hutt Central	4604	Central Ward	46	Lower Hutt City	09	Wellington Region	2.66937e+06	5.99788e+06	1	1966700	9	1077	19	3
1835400	81	562402	Papaeoia	4005	Hokowhitu Ward	40	Palmerston North City	08	Manawatu-Wanganui Region	2.73313e+06	6.09162e+06	1	1835400	6	994	28	2
1836400	210	562402	Papaeoia	4005	Hokowhitu Ward	40	Palmerston North City	08	Manawatu-Wanganui Region	2.73272e+06	6.0916e+06	1	1836400	8	1040	94	3
786801	165	521801	Otahuhu North	706	Tamaki-Maungakiekie Ward	7	Auckland City	02	Auckland Region	2.67463e+06	6.47205e+06	1	786801	10	1145	74	3
786902	135	521801	Otahuhu North	706	Tamaki-Maungakiekie Ward	7	Auckland City	02	Auckland Region	2.67479e+06	6.47196e+06	1	786902	9	1123	61	3
2098501	57	574600	Wadestown	4703	Lambton Ward	47	Wellington City	09	Wellington Region	2.65902e+06	5.99265e+06	1	2098501	1	871	19	1
2097300	42	574402	Ngaio	4702	Onslow-Western Ward	47	Wellington City	09	Wellington Region	2.65925e+06	5.99335e+06	1	2097300	2	904	14	1
2098100	276	574402	Ngaio	4702	Onslow-Western Ward	47	Wellington City	09	Wellington Region	2.65832e+06	5.99318e+06	1	2098100	1	893	91	1
2097504	33	574402	Ngaio	4702	Onslow-Western Ward	47	Wellington City	09	Wellington Region	2.65916e+06	5.99331e+06	1	2097504	1	877	11	1
2884300	117	603910	Wakari	7104	Hills Ward	71	Dunedin City	14	Otago Region	2.31411e+06	5.47942e+06	1	2884300	6	990	41	2
2884900	69	603910	Wakari	7104	Hills Ward	71	Dunedin City	14	Otago Region	2.31432e+06	5.47989e+06	1	2884900	6	987	24	2
2885000	105	603910	Wakari	7104	Hills Ward	71	Dunedin City	14	Otago Region	2.31441e+06	5.47981e+06	1	2885000	4	945	37	2
1966400	231	569100	Hutt Central	4604	Central Ward	46	Lower Hutt City	09	Wellington Region	2.66954e+06	5.99684e+06	1	1966400	9	1077	104	3
1966200	84	569100	Hutt Central	4604	Central Ward	46	Lower Hutt City	09	Wellington Region	2.6693e+06	5.99741e+06	1	1966200	1	888	28	1
1966100	45	569100	Hutt Central	4604	Central Ward	46	Lower Hutt City	09	Wellington Region	2.66972e+06	5.99751e+06	1	1966100	1	863	15	1
1836500	138	562402	Papaeoia	4005	Hokowhitu Ward	40	Palmerston North City	08	Manawatu-Wanganui Region	2.73291e+06	6.09156e+06	1	1836500	9	1105	62	3
655400	135	521502	Cockle Bay	806	Howick Ward	8	Manukau City	02	Auckland Region	2.6842e+06	6.47596e+06	1	655400	2	916	45	1
2119100	6	572900	Thorndon-Tinakori Road	4703	Lambton Ward	47	Wellington City	09	Wellington Region	2.6591e+06	5.99085e+06	1	2119100	6	977	2	2
787900	24	521802	Fairburn	706	Tamaki-Maungakiekie Ward	7	Auckland City	02	Auckland Region	2.67497e+06	6.47149e+06	1	787900	10	1152	11	3
786802	189	521801	Otahuhu North	706	Tamaki-Maungakiekie Ward	7	Auckland City	02	Auckland Region	2.67465e+06	6.47191e+06	1	786802	10	1188	85	3
2097400	69	574402	Ngaio	4702	Onslow-Western Ward	47	Wellington City	09	Wellington Region	2.65866e+06	5.99325e+06	1	2097400	1	877	23	1
2884500	30	603910	Wakari	7104	Hills Ward	71	Dunedin City	14	Otago Region	2.31433e+06	5.47939e+06	1	2884500	7	1011	10	2
2885100	129	603910	Wakari	7104	Hills Ward	71	Dunedin City	14	Otago Region	2.31453e+06	5.47968e+06	1	2885100	10	1193	58	3
2884100	111	603910	Wakari	7104	Hills Ward	71	Dunedin City	14	Otago Region	2.31427e+06	5.47969e+06	1	2884100	8	1041	50	3
1835100	21	562402	Papaeoia	4001	Papaioea Ward	40	Palmerston North City	08	Manawatu-Wanganui Region	2.73306e+06	6.09192e+06	1	1835100	9	1105	9	3
1835900	93	562402	Papaeoia	4001	Papaioea Ward	40	Palmerston North City	08	Manawatu-Wanganui Region	2.73268e+06	6.09197e+06	1	1835900	5	967	33	2
1967300	3	569100	Hutt Central	4604	Central Ward	46	Lower Hutt City	09	Wellington Region	2.66935e+06	5.99779e+06	1	1967300	9	1077	1	3
1966800	18	569100	Hutt Central	4604	Central Ward	46	Lower Hutt City	09	Wellington Region	2.66947e+06	5.99805e+06	1	1966800	9	1077	8	3
787400	336	521801	Otahuhu North	706	Tamaki-Maungakiekie Ward	7	Auckland City	02	Auckland Region	2.67489e+06	6.47175e+06	1	787400	9	1131	151	3
2097601	204	574402	Ngaio	4702	Onslow-Western Ward	47	Wellington City	09	Wellington Region	2.65872e+06	5.99305e+06	1	2097601	1	874	67	1
2097900	9	574402	Ngaio	4702	Onslow-Western Ward	47	Wellington City	09	Wellington Region	2.65799e+06	5.99291e+06	1	2097900	1	879	3	1
2097700	3	574402	Ngaio	4702	Onslow-Western Ward	47	Wellington City	09	Wellington Region	2.65849e+06	5.99354e+06	1	2097700	1	879	1	1
1836200	66	562402	Papaeoia	4001	Papaioea Ward	40	Palmerston North City	08	Manawatu-Wanganui Region	2.73245e+06	6.09182e+06	1	1836200	8	1051	30	3
1835200	81	562402	Papaeoia	4005	Hokowhitu Ward	40	Palmerston North City	08	Manawatu-Wanganui Region	2.73319e+06	6.09185e+06	1	1835200	10	1213	36	3
1835700	222	562402	Papaeoia	4001	Papaioea Ward	40	Palmerston North City	08	Manawatu-Wanganui Region	2.73243e+06	6.09225e+06	1	1835700	6	987	78	2
787300	99	521801	Otahuhu North	706	Tamaki-Maungakiekie Ward	7	Auckland City	02	Auckland Region	2.67471e+06	6.4717e+06	1	787300	10	1152	45	3
2098602	33	574600	Wadestown	4703	Lambton Ward	47	Wellington City	09	Wellington Region	2.65937e+06	5.9926e+06	1	2098602	1	871	11	1
2098300	111	574402	Ngaio	4702	Onslow-Western Ward	47	Wellington City	09	Wellington Region	2.65835e+06	5.99293e+06	1	2098300	1	876	37	1
2884002	42	603910	Wakari	7104	Hills Ward	71	Dunedin City	14	Otago Region	2.31394e+06	5.47963e+06	1	2884002	1	882	14	1
2884200	129	603910	Wakari	7104	Hills Ward	71	Dunedin City	14	Otago Region	2.31417e+06	5.47953e+06	1	2884200	6	977	45	2
1966300	90	569100	Hutt Central	4604	Central Ward	46	Lower Hutt City	09	Wellington Region	2.66942e+06	5.99715e+06	1	1966300	3	929	30	1
1835500	156	562402	Papaeoia	4005	Hokowhitu Ward	40	Palmerston North City	08	Manawatu-Wanganui Region	2.73331e+06	6.09169e+06	1	1835500	7	1025	55	2
1836300	51	562402	Papaeoia	4001	Papaioea Ward	40	Palmerston North City	08	Manawatu-Wanganui Region	2.73266e+06	6.0917e+06	1	1836300	8	1051	23	3
1835300	63	562402	Papaeoia	4005	Hokowhitu Ward	40	Palmerston North City	08	Manawatu-Wanganui Region	2.73302e+06	6.09176e+06	1	1835300	9	1105	28	3
1944400	87	568401	Avalon West	4604	Central Ward	46	Lower Hutt City	09	Wellington Region	2.67252e+06	5.99959e+06	1	1944400	6	985	30	2
786901	189	521801	Otahuhu North	706	Tamaki-Maungakiekie Ward	7	Auckland City	02	Auckland Region	2.67485e+06	6.47206e+06	1	786901	10	1185	85	3
655600	171	521502	Cockle Bay	806	Howick Ward	8	Manukau City	02	Auckland Region	2.68443e+06	6.4757e+06	1	655600	1	887	56	1
2097200	120	574402	Ngaio	4702	Onslow-Western Ward	47	Wellington City	09	Wellington Region	2.65895e+06	5.99331e+06	1	2097200	1	882	40	1
2884400	108	603910	Wakari	7104	Hills Ward	71	Dunedin City	14	Otago Region	2.31441e+06	5.47954e+06	1	2884400	7	1011	38	2
2884001	90	603910	Wakari	7104	Hills Ward	71	Dunedin City	14	Otago Region	2.31382e+06	5.47979e+06	1	2884001	1	882	30	1
787800	117	521802	Fairburn	706	Tamaki-Maungakiekie Ward	7	Auckland City	02	Auckland Region	2.67477e+06	6.47147e+06	1	787800	10	1165	53	3
786600	84	521801	Otahuhu North	706	Tamaki-Maungakiekie Ward	7	Auckland City	02	Auckland Region	2.67477e+06	6.4722e+06	1	786600	10	1145	38	3
2097503	60	574402	Ngaio	4702	Onslow-Western Ward	47	Wellington City	09	Wellington Region	2.65919e+06	5.99312e+06	1	2097503	1	877	20	1
2885200	96	603910	Wakari	7104	Hills Ward	71	Dunedin City	14	Otago Region	2.31466e+06	5.4797e+06	1	2885200	6	987	34	2
2884600	69	603910	Wakari	7104	Hills Ward	71	Dunedin City	14	Otago Region	2.31396e+06	5.48018e+06	1	2884600	5	965	24	2
1966500	84	569100	Hutt Central	4604	Central Ward	46	Lower Hutt City	09	Wellington Region	2.66956e+06	5.99694e+06	1	1966500	1	863	28	1
1836600	102	562402	Papaeoia	4005	Hokowhitu Ward	40	Palmerston North City	08	Manawatu-Wanganui Region	2.73269e+06	6.09142e+06	1	1836600	6	994	36	2
1836000	42	562402	Papaeoia	4001	Papaioea Ward	40	Palmerston North City	08	Manawatu-Wanganui Region	2.73258e+06	6.09191e+06	1	1836000	5	967	15	2
1836100	42	562402	Papaeoia	4001	Papaioea Ward	40	Palmerston North City	08	Manawatu-Wanganui Region	2.73251e+06	6.09192e+06	1	1836100	5	967	15	2
240504	30	510700	Henderson North	603	Henderson Ward	6	Waitakere City	02	Auckland Region	2.65676e+06	6.47911e+06	1	240504	8	1062	14	3
2097502	45	574402	Ngaio	4702	Onslow-Western Ward	47	Wellington City	09	Wellington Region	2.6593e+06	5.99292e+06	1	2097502	1	877	15	1
264800	132	511402	Rewarewa	604	New Lynn Ward	6	Waitakere City	02	Auckland Region	2.66056e+06	6.47471e+06	1	264800	6	998	46	2
789200	144	521802	Fairburn	706	Tamaki-Maungakiekie Ward	7	Auckland City	02	Auckland Region	2.67526e+06	6.47087e+06	1	789200	9	1131	65	3
2885700	36	603910	Wakari	7104	Hills Ward	71	Dunedin City	14	Otago Region	2.31439e+06	5.48004e+06	1	2885700	6	994	13	2
1706400	33	557200	St Johns Hill	3702	Urban Ward	37	Wanganui District	08	Manawatu-Wanganui Region	2.68369e+06	6.14116e+06	1	1706400	4	941	12	2
1705802	69	557200	St Johns Hill	3702	Urban Ward	37	Wanganui District	08	Manawatu-Wanganui Region	2.68349e+06	6.14117e+06	1	1705802	1	872	23	1
1967900	108	569100	Hutt Central	4604	Central Ward	46	Lower Hutt City	09	Wellington Region	2.67028e+06	5.99798e+06	1	1967900	3	919	36	1
1968100	9	569100	Hutt Central	4604	Central Ward	46	Lower Hutt City	09	Wellington Region	2.66986e+06	5.99796e+06	1	1968100	2	915	3	1
789600	213	521802	Fairburn	706	Tamaki-Maungakiekie Ward	7	Auckland City	02	Auckland Region	2.67499e+06	6.47038e+06	1	789600	9	1115	96	3
789500	174	521802	Fairburn	706	Tamaki-Maungakiekie Ward	7	Auckland City	02	Auckland Region	2.67498e+06	6.4706e+06	1	789500	9	1110	78	3
788602	192	521802	Fairburn	706	Tamaki-Maungakiekie Ward	7	Auckland City	02	Auckland Region	2.67503e+06	6.4712e+06	1	788602	8	1068	86	3
2099300	183	574600	Wadestown	4703	Lambton Ward	47	Wellington City	09	Wellington Region	2.65931e+06	5.99226e+06	1	2099300	2	905	60	1
1705600	72	557200	St Johns Hill	3702	Urban Ward	37	Wanganui District	08	Manawatu-Wanganui Region	2.68392e+06	6.14094e+06	1	1705600	3	930	24	1
1968200	96	569100	Hutt Central	4604	Central Ward	46	Lower Hutt City	09	Wellington Region	2.67027e+06	5.99786e+06	1	1968200	2	915	32	1
2512601	156	588200	Styx Mill	6001	Shirley-Papanui Ward	60	Christchurch City	13	Canterbury Region	2.4789e+06	5.74785e+06	1	2512601	9	1128	70	3
2886200	48	603910	Wakari	7104	Hills Ward	71	Dunedin City	14	Otago Region	2.31474e+06	5.47979e+06	1	2886200	5	969	17	2
1705700	72	557200	St Johns Hill	3702	Urban Ward	37	Wanganui District	08	Manawatu-Wanganui Region	2.6841e+06	6.14078e+06	1	1705700	1	887	24	1
1968400	120	569100	Hutt Central	4604	Central Ward	46	Lower Hutt City	09	Wellington Region	2.67023e+06	5.99774e+06	1	1968400	3	932	40	1
2119300	105	572900	Thorndon-Tinakori Road	4703	Lambton Ward	47	Wellington City	09	Wellington Region	2.65891e+06	5.9911e+06	1	2119300	7	1016	37	2
265300	120	511303	Lynnmall	604	New Lynn Ward	6	Waitakere City	02	Auckland Region	2.66091e+06	6.47506e+06	1	265300	8	1066	54	3
527400	216	517800	Mt Albert Central	703	Eden-Albert Ward	7	Auckland City	02	Auckland Region	2.6639e+06	6.4785e+06	1	527400	5	958	76	2
789300	141	521802	Fairburn	706	Tamaki-Maungakiekie Ward	7	Auckland City	02	Auckland Region	2.67488e+06	6.47093e+06	1	789300	10	1186	63	3
265200	3	511303	Lynnmall	604	New Lynn Ward	6	Waitakere City	02	Auckland Region	2.66101e+06	6.47552e+06	1	265200	8	1066	1	3
2099100	177	574600	Wadestown	4703	Lambton Ward	47	Wellington City	09	Wellington Region	2.65956e+06	5.99249e+06	1	2099100	2	909	58	1
2886400	63	604010	Roslyn North	7104	Hills Ward	71	Dunedin City	14	Otago Region	2.31522e+06	5.48004e+06	1	2886400	7	1003	22	2
1706100	132	557200	St Johns Hill	3702	Urban Ward	37	Wanganui District	08	Manawatu-Wanganui Region	2.68378e+06	6.1405e+06	1	1706100	1	891	44	1
1705801	90	557200	St Johns Hill	3702	Urban Ward	37	Wanganui District	08	Manawatu-Wanganui Region	2.68347e+06	6.14129e+06	1	1705801	1	872	30	1
1706500	147	557200	St Johns Hill	3702	Urban Ward	37	Wanganui District	08	Manawatu-Wanganui Region	2.68388e+06	6.1412e+06	1	1706500	2	905	49	1
265000	348	511303	Lynnmall	604	New Lynn Ward	6	Waitakere City	02	Auckland Region	2.66065e+06	6.47519e+06	1	265000	9	1087	157	3
2512604	159	588200	Styx Mill	6001	Shirley-Papanui Ward	60	Christchurch City	13	Canterbury Region	2.4789e+06	5.74758e+06	1	2512604	9	1099	72	3
2099901	21	574600	Wadestown	4703	Lambton Ward	47	Wellington City	09	Wellington Region	2.65893e+06	5.99279e+06	1	2099901	2	909	7	1
2886000	129	603910	Wakari	7104	Hills Ward	71	Dunedin City	14	Otago Region	2.31457e+06	5.47992e+06	1	2886000	5	969	45	2
1705803	150	557200	St Johns Hill	3702	Urban Ward	37	Wanganui District	08	Manawatu-Wanganui Region	2.68376e+06	6.14088e+06	1	1705803	2	916	50	1
1968002	57	569100	Hutt Central	4604	Central Ward	46	Lower Hutt City	09	Wellington Region	2.67052e+06	5.99791e+06	1	1968002	5	960	20	2
789400	273	521802	Fairburn	706	Tamaki-Maungakiekie Ward	7	Auckland City	02	Auckland Region	2.67481e+06	6.47068e+06	1	789400	9	1098	123	3
788601	189	521802	Fairburn	706	Tamaki-Maungakiekie Ward	7	Auckland City	02	Auckland Region	2.67479e+06	6.47117e+06	1	788601	10	1415	85	3
265100	6	511303	Lynnmall	604	New Lynn Ward	6	Waitakere City	02	Auckland Region	2.66079e+06	6.47558e+06	1	265100	8	1066	3	3
1485800	153	547700	St Leonards	3005	Hastings Ward	30	Hastings District	06	Hawke's Bay Region	2.83925e+06	6.16817e+06	1	1485800	10	1176	69	3
1706000	78	557200	St Johns Hill	3702	Urban Ward	37	Wanganui District	08	Manawatu-Wanganui Region	2.68366e+06	6.14072e+06	1	1706000	3	930	26	1
1705900	93	557200	St Johns Hill	3702	Urban Ward	37	Wanganui District	08	Manawatu-Wanganui Region	2.68395e+06	6.14067e+06	1	1705900	2	902	31	1
527100	123	517800	Mt Albert Central	703	Eden-Albert Ward	7	Auckland City	02	Auckland Region	2.66408e+06	6.47863e+06	1	527100	6	992	43	2
789100	234	521802	Fairburn	706	Tamaki-Maungakiekie Ward	7	Auckland City	02	Auckland Region	2.67507e+06	6.47084e+06	1	789100	9	1075	105	3
529800	105	517500	Kingsland	703	Eden-Albert Ward	7	Auckland City	02	Auckland Region	2.66604e+06	6.47969e+06	1	529800	10	1163	47	3
2888100	90	603920	Halfway Bush	7104	Hills Ward	71	Dunedin City	14	Otago Region	2.31303e+06	5.48012e+06	1	2888100	9	1132	40	3
2889100	93	603920	Halfway Bush	7104	Hills Ward	71	Dunedin City	14	Otago Region	2.31326e+06	5.48062e+06	1	2889100	4	947	33	2
1970400	84	569100	Hutt Central	4604	Central Ward	46	Lower Hutt City	09	Wellington Region	2.67007e+06	5.99734e+06	1	1970400	1	869	28	1
1970500	96	569100	Hutt Central	4604	Central Ward	46	Lower Hutt City	09	Wellington Region	2.67032e+06	5.99724e+06	1	1970500	1	875	32	1
1969600	126	569100	Hutt Central	4604	Central Ward	46	Lower Hutt City	09	Wellington Region	2.67112e+06	5.998e+06	1	1969600	4	948	44	2
1970700	99	568601	Waterloo West	4604	Central Ward	46	Lower Hutt City	09	Wellington Region	2.67105e+06	5.99763e+06	1	1970700	3	927	33	1
1969900	99	569100	Hutt Central	4604	Central Ward	46	Lower Hutt City	09	Wellington Region	2.67057e+06	5.99766e+06	1	1969900	4	947	35	2
1970000	165	569100	Hutt Central	4604	Central Ward	46	Lower Hutt City	09	Wellington Region	2.67008e+06	5.99762e+06	1	1970000	2	901	54	1
1840000	72	562500	Roslyn	4001	Papaioea Ward	40	Palmerston North City	08	Manawatu-Wanganui Region	2.73354e+06	6.09367e+06	1	1840000	10	1169	32	3
528000	111	517800	Mt Albert Central	703	Eden-Albert Ward	7	Auckland City	02	Auckland Region	2.66435e+06	6.47868e+06	1	528000	9	1095	50	3
2887800	99	603920	Halfway Bush	7104	Hills Ward	71	Dunedin City	14	Otago Region	2.31335e+06	5.48043e+06	1	2887800	5	967	35	2
2887500	39	603920	Halfway Bush	7104	Hills Ward	71	Dunedin City	14	Otago Region	2.31296e+06	5.48056e+06	1	2887500	9	1088	18	3
527600	81	517800	Mt Albert Central	703	Eden-Albert Ward	7	Auckland City	02	Auckland Region	2.66362e+06	6.47844e+06	1	527600	6	983	28	2
2888300	129	603920	Halfway Bush	7104	Hills Ward	71	Dunedin City	14	Otago Region	2.31366e+06	5.48013e+06	1	2888300	9	1078	58	3
1970200	132	569100	Hutt Central	4604	Central Ward	46	Lower Hutt City	09	Wellington Region	2.67039e+06	5.99751e+06	1	1970200	1	847	44	1
1970800	180	568601	Waterloo West	4604	Central Ward	46	Lower Hutt City	09	Wellington Region	2.67085e+06	5.99757e+06	1	1970800	8	1032	81	3
265500	81	511303	Lynnmall	604	New Lynn Ward	6	Waitakere City	02	Auckland Region	2.66093e+06	6.47485e+06	1	265500	9	1097	36	3
1969800	162	569100	Hutt Central	4604	Central Ward	46	Lower Hutt City	09	Wellington Region	2.67075e+06	5.99773e+06	1	1969800	4	936	57	2
529200	156	517500	Kingsland	703	Eden-Albert Ward	7	Auckland City	02	Auckland Region	2.66644e+06	6.48011e+06	1	529200	5	969	55	2
528800	102	517800	Mt Albert Central	703	Eden-Albert Ward	7	Auckland City	02	Auckland Region	2.66395e+06	6.47804e+06	1	528800	1	878	34	1
2100400	165	574600	Wadestown	4703	Lambton Ward	47	Wellington City	09	Wellington Region	2.65792e+06	5.99218e+06	1	2100400	1	894	54	1
528201	129	517800	Mt Albert Central	703	Eden-Albert Ward	7	Auckland City	02	Auckland Region	2.66441e+06	6.47857e+06	1	528201	7	1002	45	2
2888500	108	603920	Halfway Bush	7104	Hills Ward	71	Dunedin City	14	Otago Region	2.31289e+06	5.48076e+06	1	2888500	3	923	36	1
2887300	90	603920	Halfway Bush	7104	Hills Ward	71	Dunedin City	14	Otago Region	2.31277e+06	5.48043e+06	1	2887300	5	965	31	2
1971000	108	568601	Waterloo West	4604	Central Ward	46	Lower Hutt City	09	Wellington Region	2.67079e+06	5.99738e+06	1	1971000	3	927	36	1
528400	162	517800	Mt Albert Central	703	Eden-Albert Ward	7	Auckland City	02	Auckland Region	2.66393e+06	6.47819e+06	1	528400	1	879	53	1
528601	75	517800	Mt Albert Central	703	Eden-Albert Ward	7	Auckland City	02	Auckland Region	2.66414e+06	6.47827e+06	1	528601	3	934	25	1
528500	123	517800	Mt Albert Central	703	Eden-Albert Ward	7	Auckland City	02	Auckland Region	2.6638e+06	6.47804e+06	1	528500	3	934	41	1
2887400	90	603920	Halfway Bush	7104	Hills Ward	71	Dunedin City	14	Otago Region	2.31299e+06	5.48061e+06	1	2887400	4	951	31	2
2100800	75	574600	Wadestown	4703	Lambton Ward	47	Wellington City	09	Wellington Region	2.65807e+06	5.99243e+06	1	2100800	1	896	25	1
527800	102	517800	Mt Albert Central	703	Eden-Albert Ward	7	Auckland City	02	Auckland Region	2.66344e+06	6.47833e+06	1	527800	4	948	36	2
2887700	87	603920	Halfway Bush	7104	Hills Ward	71	Dunedin City	14	Otago Region	2.3132e+06	5.48036e+06	1	2887700	6	980	30	2
2887600	105	603920	Halfway Bush	7104	Hills Ward	71	Dunedin City	14	Otago Region	2.31286e+06	5.48036e+06	1	2887600	9	1088	47	3
1970600	144	569100	Hutt Central	4604	Central Ward	46	Lower Hutt City	09	Wellington Region	2.67e+06	5.99718e+06	1	1970600	1	875	48	1
1970100	213	569100	Hutt Central	4604	Central Ward	46	Lower Hutt City	09	Wellington Region	2.6702e+06	5.99751e+06	1	1970100	1	897	70	1
1970300	132	569100	Hutt Central	4604	Central Ward	46	Lower Hutt City	09	Wellington Region	2.6699e+06	5.99744e+06	1	1970300	1	869	44	1
528202	171	517800	Mt Albert Central	703	Eden-Albert Ward	7	Auckland City	02	Auckland Region	2.66452e+06	6.47847e+06	1	528202	7	1019	60	2
1969700	87	569100	Hutt Central	4604	Central Ward	46	Lower Hutt City	09	Wellington Region	2.6709e+06	5.99785e+06	1	1969700	4	947	30	2
527700	123	517800	Mt Albert Central	703	Eden-Albert Ward	7	Auckland City	02	Auckland Region	2.6638e+06	6.47831e+06	1	527700	2	912	41	1
528300	159	517800	Mt Albert Central	703	Eden-Albert Ward	7	Auckland City	02	Auckland Region	2.66407e+06	6.47835e+06	1	528300	3	931	52	1
528100	102	517800	Mt Albert Central	703	Eden-Albert Ward	7	Auckland City	02	Auckland Region	2.66421e+06	6.47858e+06	1	528100	4	941	36	2
265400	195	511303	Lynnmall	604	New Lynn Ward	6	Waitakere City	02	Auckland Region	2.66107e+06	6.47485e+06	1	265400	9	1136	88	3
1161104	213	537301	Brookfield	2302	Otumoetai-Bethlehem Ward	23	Tauranga City	04	Bay of Plenty Region	2.78625e+06	6.38494e+06	1	1161104	9	1077	96	3
266200	18	511303	Lynnmall	604	New Lynn Ward	6	Waitakere City	02	Auckland Region	2.66087e+06	6.47592e+06	1	266200	8	1058	8	3
529000	57	517500	Kingsland	703	Eden-Albert Ward	7	Auckland City	02	Auckland Region	2.66656e+06	6.48017e+06	1	529000	4	950	20	2
529300	135	517500	Kingsland	703	Eden-Albert Ward	7	Auckland City	02	Auckland Region	2.6663e+06	6.48003e+06	1	529300	7	1004	47	2
1839702	18	562200	Kelvin Grove	4001	Papaioea Ward	40	Palmerston North City	08	Manawatu-Wanganui Region	2.73474e+06	6.09273e+06	1	1839702	1	879	6	1
1944904	84	568401	Avalon West	4604	Central Ward	46	Lower Hutt City	09	Wellington Region	2.67342e+06	5.99996e+06	1	1944904	2	906	28	1
2359904	93	583300	Grampians	5299	Area Outside Ward	52	Nelson City	17	Nelson Region	2.53151e+06	5.98908e+06	1	2359904	2	904	31	1
529100	51	517500	Kingsland	703	Eden-Albert Ward	7	Auckland City	02	Auckland Region	2.6665e+06	6.48017e+06	1	529100	4	950	18	2
2887900	69	603920	Halfway Bush	7104	Hills Ward	71	Dunedin City	14	Otago Region	2.31331e+06	5.48026e+06	1	2887900	6	980	24	2
372104	177	514600	Avondale South	702	Avondale-Roskill Ward	7	Auckland City	02	Auckland Region	2.66191e+06	6.4752e+06	1	372104	6	990	62	2
527900	162	517800	Mt Albert Central	703	Eden-Albert Ward	7	Auckland City	02	Auckland Region	2.66364e+06	6.47817e+06	1	527900	2	910	53	1
1712500	153	555700	Castlecliff North	3702	Urban Ward	37	Wanganui District	08	Manawatu-Wanganui Region	2.67917e+06	6.13916e+06	1	1712500	10	1215	69	3
1711800	135	555700	Castlecliff North	3702	Urban Ward	37	Wanganui District	08	Manawatu-Wanganui Region	2.67892e+06	6.13977e+06	1	1711800	9	1125	61	3
2889300	165	603920	Halfway Bush	7104	Hills Ward	71	Dunedin City	14	Otago Region	2.31353e+06	5.48061e+06	1	2889300	5	959	58	2
2891300	174	603500	Woodhaugh	7103	Cargill Ward	71	Dunedin City	14	Otago Region	2.31668e+06	5.48059e+06	1	2891300	9	1105	78	3
529900	204	517500	Kingsland	703	Eden-Albert Ward	7	Auckland City	02	Auckland Region	2.66557e+06	6.4799e+06	1	529900	6	981	71	2
1971600	84	568602	Waterloo East	4605	Eastern Ward	46	Lower Hutt City	09	Wellington Region	2.67106e+06	5.99725e+06	1	1971600	5	961	29	2
530500	153	517500	Kingsland	703	Eden-Albert Ward	7	Auckland City	02	Auckland Region	2.66579e+06	6.47967e+06	1	530500	4	943	54	2
1841000	87	562500	Roslyn	4001	Papaioea Ward	40	Palmerston North City	08	Manawatu-Wanganui Region	2.73333e+06	6.09371e+06	1	1841000	10	1291	39	3
531100	144	517500	Kingsland	703	Eden-Albert Ward	7	Auckland City	02	Auckland Region	2.66642e+06	6.47957e+06	1	531100	7	1001	50	2
530600	156	517500	Kingsland	703	Eden-Albert Ward	7	Auckland City	02	Auckland Region	2.66548e+06	6.47952e+06	1	530600	7	1020	55	2
1841700	156	562500	Roslyn	4001	Papaioea Ward	40	Palmerston North City	08	Manawatu-Wanganui Region	2.73358e+06	6.09327e+06	1	1841700	10	1169	70	3
1841401	15	562500	Roslyn	4001	Papaioea Ward	40	Palmerston North City	08	Manawatu-Wanganui Region	2.73387e+06	6.09356e+06	1	1841401	5	960	5	2
2888600	75	603920	Halfway Bush	7104	Hills Ward	71	Dunedin City	14	Otago Region	2.31315e+06	5.48084e+06	1	2888600	5	968	26	2
1971400	159	568602	Waterloo East	4605	Eastern Ward	46	Lower Hutt City	09	Wellington Region	2.67128e+06	5.99744e+06	1	1971400	3	930	52	1
529700	45	517500	Kingsland	703	Eden-Albert Ward	7	Auckland City	02	Auckland Region	2.66618e+06	6.47981e+06	1	529700	10	1163	20	3
530300	174	517500	Kingsland	703	Eden-Albert Ward	7	Auckland City	02	Auckland Region	2.66577e+06	6.47975e+06	1	530300	6	995	61	2
530900	12	517500	Kingsland	703	Eden-Albert Ward	7	Auckland City	02	Auckland Region	2.66641e+06	6.47986e+06	1	530900	5	953	4	2
529500	114	517500	Kingsland	703	Eden-Albert Ward	7	Auckland City	02	Auckland Region	2.66641e+06	6.47995e+06	1	529500	6	978	40	2
529600	93	517500	Kingsland	703	Eden-Albert Ward	7	Auckland City	02	Auckland Region	2.66622e+06	6.47993e+06	1	529600	4	950	33	2
2888700	30	603920	Halfway Bush	7104	Hills Ward	71	Dunedin City	14	Otago Region	2.31305e+06	5.48071e+06	1	2888700	5	968	10	2
2889000	105	603920	Halfway Bush	7104	Hills Ward	71	Dunedin City	14	Otago Region	2.31332e+06	5.48071e+06	1	2889000	4	947	37	2
1971800	69	568602	Waterloo East	4605	Eastern Ward	46	Lower Hutt City	09	Wellington Region	2.67074e+06	5.99702e+06	1	1971800	4	946	24	2
1971500	141	568602	Waterloo East	4605	Eastern Ward	46	Lower Hutt City	09	Wellington Region	2.67127e+06	5.99726e+06	1	1971500	7	1003	49	2
1841201	174	562500	Roslyn	4001	Papaioea Ward	40	Palmerston North City	08	Manawatu-Wanganui Region	2.73374e+06	6.09377e+06	1	1841201	6	998	61	2
1840900	123	562500	Roslyn	4001	Papaioea Ward	40	Palmerston North City	08	Manawatu-Wanganui Region	2.73328e+06	6.0938e+06	1	1840900	10	1139	55	3
1971200	132	568601	Waterloo West	4604	Central Ward	46	Lower Hutt City	09	Wellington Region	2.6706e+06	5.99727e+06	1	1971200	1	877	44	1
1971300	126	568601	Waterloo West	4604	Central Ward	46	Lower Hutt City	09	Wellington Region	2.67071e+06	5.9972e+06	1	1971300	1	860	42	1
530100	114	517500	Kingsland	703	Eden-Albert Ward	7	Auckland City	02	Auckland Region	2.66576e+06	6.47983e+06	1	530100	3	927	38	1
1840100	117	562500	Roslyn	4001	Papaioea Ward	40	Palmerston North City	08	Manawatu-Wanganui Region	2.73331e+06	6.09362e+06	1	1840100	10	1169	53	3
1841500	141	562500	Roslyn	4001	Papaioea Ward	40	Palmerston North City	08	Manawatu-Wanganui Region	2.734e+06	6.09359e+06	1	1841500	5	956	49	2
1841300	114	562500	Roslyn	4001	Papaioea Ward	40	Palmerston North City	08	Manawatu-Wanganui Region	2.73377e+06	6.09357e+06	1	1841300	5	960	40	2
531000	51	517500	Kingsland	703	Eden-Albert Ward	7	Auckland City	02	Auckland Region	2.66646e+06	6.47976e+06	1	531000	8	1039	23	3
530200	183	517500	Kingsland	703	Eden-Albert Ward	7	Auckland City	02	Auckland Region	2.66546e+06	6.47972e+06	1	530200	7	1009	64	2
529400	6	517500	Kingsland	703	Eden-Albert Ward	7	Auckland City	02	Auckland Region	2.66665e+06	6.48005e+06	1	529400	6	978	2	2
1971700	108	568602	Waterloo East	4605	Eastern Ward	46	Lower Hutt City	09	Wellington Region	2.67088e+06	5.99716e+06	1	1971700	5	961	38	2
1841800	162	562500	Roslyn	4001	Papaioea Ward	40	Palmerston North City	08	Manawatu-Wanganui Region	2.73371e+06	6.09334e+06	1	1841800	10	1150	73	3
1841402	135	562500	Roslyn	4001	Papaioea Ward	40	Palmerston North City	08	Manawatu-Wanganui Region	2.7339e+06	6.09342e+06	1	1841402	3	925	45	1
661100	291	522201	Papatoetoe North	802	Papatoetoe Ward	8	Manukau City	02	Auckland Region	2.6756e+06	6.46873e+06	1	661100	7	1015	102	2
530400	132	517500	Kingsland	703	Eden-Albert Ward	7	Auckland City	02	Auckland Region	2.66549e+06	6.47962e+06	1	530400	7	1002	46	2
1971100	153	568601	Waterloo West	4604	Central Ward	46	Lower Hutt City	09	Wellington Region	2.67058e+06	5.99749e+06	1	1971100	2	909	50	1
530000	168	517500	Kingsland	703	Eden-Albert Ward	7	Auckland City	02	Auckland Region	2.66547e+06	6.47981e+06	1	530000	3	926	55	1
1841100	96	562500	Roslyn	4001	Papaioea Ward	40	Palmerston North City	08	Manawatu-Wanganui Region	2.73359e+06	6.09391e+06	1	1841100	8	1032	43	3
2103700	33	574700	Wilton-Otari	4703	Lambton Ward	47	Wellington City	09	Wellington Region	2.65787e+06	5.99232e+06	1	2103700	1	885	11	1
2890401	132	603810	Glenleith	7104	Hills Ward	71	Dunedin City	14	Otago Region	2.31593e+06	5.48207e+06	1	2890401	4	950	46	2
1971900	81	568602	Waterloo East	4605	Eastern Ward	46	Lower Hutt City	09	Wellington Region	2.67088e+06	5.99701e+06	1	1971900	4	946	28	2
1972000	54	568602	Waterloo East	4605	Eastern Ward	46	Lower Hutt City	09	Wellington Region	2.67104e+06	5.9971e+06	1	1972000	3	922	18	1
530700	87	517500	Kingsland	703	Eden-Albert Ward	7	Auckland City	02	Auckland Region	2.66571e+06	6.47956e+06	1	530700	6	981	30	2
530800	48	517500	Kingsland	703	Eden-Albert Ward	7	Auckland City	02	Auckland Region	2.66587e+06	6.47962e+06	1	530800	3	927	16	1
534700	138	517600	St Lukes	703	Eden-Albert Ward	7	Auckland City	02	Auckland Region	2.66507e+06	6.47916e+06	1	534700	7	1013	48	2
2893600	72	603710	Maori Hill	7104	Hills Ward	71	Dunedin City	14	Otago Region	2.31573e+06	5.48019e+06	1	2893600	1	888	24	1
1976102	48	568701	Waiwhetu North	4605	Eastern Ward	46	Lower Hutt City	09	Wellington Region	2.67092e+06	5.99642e+06	1	1976102	8	1057	22	3
1842400	123	562500	Roslyn	4001	Papaioea Ward	40	Palmerston North City	08	Manawatu-Wanganui Region	2.73373e+06	6.09283e+06	1	1842400	10	1273	55	3
925000	156	529300	Glenview	1603	South Ward	16	Hamilton City	03	Waikato Region	2.71127e+06	6.37291e+06	1	925000	4	945	55	2
925201	72	529300	Glenview	1603	South Ward	16	Hamilton City	03	Waikato Region	2.71144e+06	6.37289e+06	1	925201	6	985	25	2
438304	129	514103	Auckland Central East	704	Hobson Ward	7	Auckland City	02	Auckland Region	2.66857e+06	6.48215e+06	1	438304	9	1080	58	3
531800	18	517500	Kingsland	703	Eden-Albert Ward	7	Auckland City	02	Auckland Region	2.66582e+06	6.47955e+06	1	531800	8	1045	8	3
2892200	81	603720	Balmacewen	7104	Hills Ward	71	Dunedin City	14	Otago Region	2.3155e+06	5.48046e+06	1	2892200	4	950	28	2
925301	66	529300	Glenview	1603	South Ward	16	Hamilton City	03	Waikato Region	2.71203e+06	6.37274e+06	1	925301	3	920	22	1
2630000	90	595300	Hillmorton	6006	Spreydon-Heathcote Ward	60	Christchurch City	13	Canterbury Region	2.4766e+06	5.73874e+06	1	2630000	6	982	31	2
2104902	90	574700	Wilton-Otari	4702	Onslow-Western Ward	47	Wellington City	09	Wellington Region	2.65764e+06	5.99262e+06	1	2104902	4	938	31	2
2105002	117	574700	Wilton-Otari	4702	Onslow-Western Ward	47	Wellington City	09	Wellington Region	2.65777e+06	5.9927e+06	1	2105002	5	967	41	2
532200	93	517500	Kingsland	703	Eden-Albert Ward	7	Auckland City	02	Auckland Region	2.6655e+06	6.47929e+06	1	532200	4	946	33	2
2629200	3	590300	Middleton	6006	Spreydon-Heathcote Ward	60	Christchurch City	13	Canterbury Region	2.47672e+06	5.73955e+06	1	2629200	4	942	1	2
1712300	54	555700	Castlecliff North	3702	Urban Ward	37	Wanganui District	08	Manawatu-Wanganui Region	2.6791e+06	6.1396e+06	1	1712300	10	1205	24	3
1712200	111	555700	Castlecliff North	3702	Urban Ward	37	Wanganui District	08	Manawatu-Wanganui Region	2.67908e+06	6.13945e+06	1	1712200	9	1136	50	3
2892102	120	603710	Maori Hill	7104	Hills Ward	71	Dunedin City	14	Otago Region	2.31553e+06	5.48035e+06	1	2892102	3	928	40	1
2890700	144	603500	Woodhaugh	7104	Hills Ward	71	Dunedin City	14	Otago Region	2.31601e+06	5.48148e+06	1	2890700	6	993	50	2
532100	288	517500	Kingsland	703	Eden-Albert Ward	7	Auckland City	02	Auckland Region	2.66544e+06	6.47934e+06	1	532100	4	946	101	2
532700	114	517500	Kingsland	703	Eden-Albert Ward	7	Auckland City	02	Auckland Region	2.66522e+06	6.47909e+06	1	532700	3	929	38	1
1843600	144	562500	Roslyn	4001	Papaioea Ward	40	Palmerston North City	08	Manawatu-Wanganui Region	2.73372e+06	6.09253e+06	1	1843600	9	1084	65	3
438216	318	514101	Auckland Harbourside	704	Hobson Ward	7	Auckland City	02	Auckland Region	2.66871e+06	6.4821e+06	1	438216	7	1029	111	2
532000	93	517500	Kingsland	703	Eden-Albert Ward	7	Auckland City	02	Auckland Region	2.66542e+06	6.47943e+06	1	532000	8	1045	42	3
925500	156	529300	Glenview	1603	South Ward	16	Hamilton City	03	Waikato Region	2.71198e+06	6.37226e+06	1	925500	4	936	55	2
532600	141	517500	Kingsland	703	Eden-Albert Ward	7	Auckland City	02	Auckland Region	2.66546e+06	6.47918e+06	1	532600	3	929	47	1
1711900	24	555700	Castlecliff North	3702	Urban Ward	37	Wanganui District	08	Manawatu-Wanganui Region	2.67881e+06	6.13942e+06	1	1711900	10	1141	11	3
1712400	84	555700	Castlecliff North	3702	Urban Ward	37	Wanganui District	08	Manawatu-Wanganui Region	2.67932e+06	6.1393e+06	1	1712400	10	1165	38	3
1711500	207	555700	Castlecliff North	3702	Urban Ward	37	Wanganui District	08	Manawatu-Wanganui Region	2.67865e+06	6.13992e+06	1	1711500	9	1129	93	3
1711600	75	555700	Castlecliff North	3702	Urban Ward	37	Wanganui District	08	Manawatu-Wanganui Region	2.67844e+06	6.13997e+06	1	1711600	10	1141	34	3
2891202	36	603500	Woodhaugh	7103	Cargill Ward	71	Dunedin City	14	Otago Region	2.31674e+06	5.48066e+06	1	2891202	6	993	13	2
2890900	51	603500	Woodhaugh	7104	Hills Ward	71	Dunedin City	14	Otago Region	2.3163e+06	5.48131e+06	1	2890900	3	927	17	1
1842901	72	562500	Roslyn	4001	Papaioea Ward	40	Palmerston North City	08	Manawatu-Wanganui Region	2.73327e+06	6.09251e+06	1	1842901	9	1103	32	3
1842100	72	562500	Roslyn	4001	Papaioea Ward	40	Palmerston North City	08	Manawatu-Wanganui Region	2.73358e+06	6.093e+06	1	1842100	10	1186	32	3
532800	99	517500	Kingsland	703	Eden-Albert Ward	7	Auckland City	02	Auckland Region	2.66548e+06	6.47908e+06	1	532800	4	950	35	2
925304	51	529300	Glenview	1603	South Ward	16	Hamilton City	03	Waikato Region	2.71184e+06	6.37218e+06	1	925304	2	917	17	1
1712000	39	555700	Castlecliff North	3702	Urban Ward	37	Wanganui District	08	Manawatu-Wanganui Region	2.67895e+06	6.13924e+06	1	1712000	10	1165	18	3
438104	33	514103	Auckland Central East	704	Hobson Ward	7	Auckland City	02	Auckland Region	2.66812e+06	6.48248e+06	1	438104	8	1060	15	3
1843000	141	562500	Roslyn	4001	Papaioea Ward	40	Palmerston North City	08	Manawatu-Wanganui Region	2.73343e+06	6.09225e+06	1	1843000	5	972	49	2
532900	114	517500	Kingsland	703	Eden-Albert Ward	7	Auckland City	02	Auckland Region	2.66545e+06	6.47898e+06	1	532900	4	950	40	2
1842200	72	562500	Roslyn	4001	Papaioea Ward	40	Palmerston North City	08	Manawatu-Wanganui Region	2.73369e+06	6.09295e+06	1	1842200	10	1186	32	3
662400	6	522201	Papatoetoe North	802	Papatoetoe Ward	8	Manukau City	02	Auckland Region	2.67595e+06	6.46858e+06	1	662400	9	1079	3	3
925100	126	529300	Glenview	1603	South Ward	16	Hamilton City	03	Waikato Region	2.71167e+06	6.37291e+06	1	925100	3	920	42	1
2629300	165	595300	Hillmorton	6006	Spreydon-Heathcote Ward	60	Christchurch City	13	Canterbury Region	2.47685e+06	5.73901e+06	1	2629300	5	957	58	2
531900	87	517500	Kingsland	703	Eden-Albert Ward	7	Auckland City	02	Auckland Region	2.66565e+06	6.47949e+06	1	531900	8	1045	39	3
2105200	228	574700	Wilton-Otari	4702	Onslow-Western Ward	47	Wellington City	09	Wellington Region	2.65754e+06	5.99269e+06	1	2105200	3	931	75	1
531300	6	517500	Kingsland	703	Eden-Albert Ward	7	Auckland City	02	Auckland Region	2.66604e+06	6.47961e+06	1	531300	5	953	2	2
2891400	63	603500	Woodhaugh	7104	Hills Ward	71	Dunedin City	14	Otago Region	2.31623e+06	5.4806e+06	1	2891400	3	924	21	1
438212	222	514101	Auckland Harbourside	704	Hobson Ward	7	Auckland City	02	Auckland Region	2.66835e+06	6.48252e+06	1	438212	7	1030	78	2
1842700	117	562500	Roslyn	4001	Papaioea Ward	40	Palmerston North City	08	Manawatu-Wanganui Region	2.73331e+06	6.0921e+06	1	1842700	9	1093	53	3
925202	75	529300	Glenview	1603	South Ward	16	Hamilton City	03	Waikato Region	2.71178e+06	6.37277e+06	1	925202	6	985	26	2
1711700	78	555700	Castlecliff North	3702	Urban Ward	37	Wanganui District	08	Manawatu-Wanganui Region	2.67878e+06	6.13963e+06	1	1711700	10	1205	35	3
2891100	69	603500	Woodhaugh	7104	Hills Ward	71	Dunedin City	14	Otago Region	2.31613e+06	5.48088e+06	1	2891100	3	924	23	1
2891000	180	603500	Woodhaugh	7104	Hills Ward	71	Dunedin City	14	Otago Region	2.31617e+06	5.48101e+06	1	2891000	7	1019	63	2
1842500	120	562500	Roslyn	4001	Papaioea Ward	40	Palmerston North City	08	Manawatu-Wanganui Region	2.73302e+06	6.09261e+06	1	1842500	9	1134	54	3
1841900	171	562500	Roslyn	4001	Papaioea Ward	40	Palmerston North City	08	Manawatu-Wanganui Region	2.73401e+06	6.0933e+06	1	1841900	5	966	60	2
532300	108	517500	Kingsland	703	Eden-Albert Ward	7	Auckland City	02	Auckland Region	2.66603e+06	6.47934e+06	1	532300	6	997	38	2
925203	81	529300	Glenview	1603	South Ward	16	Hamilton City	03	Waikato Region	2.71179e+06	6.37268e+06	1	925203	6	985	28	2
925303	213	529300	Glenview	1603	South Ward	16	Hamilton City	03	Waikato Region	2.7119e+06	6.37255e+06	1	925303	2	917	70	1
2105100	102	574700	Wilton-Otari	4702	Onslow-Western Ward	47	Wellington City	09	Wellington Region	2.6578e+06	5.99257e+06	1	2105100	4	941	36	2
1712100	126	555700	Castlecliff North	3702	Urban Ward	37	Wanganui District	08	Manawatu-Wanganui Region	2.67897e+06	6.1394e+06	1	1712100	9	1075	57	3
531200	156	517500	Kingsland	703	Eden-Albert Ward	7	Auckland City	02	Auckland Region	2.66622e+06	6.4796e+06	1	531200	8	1039	70	3
531400	165	517500	Kingsland	703	Eden-Albert Ward	7	Auckland City	02	Auckland Region	2.666e+06	6.47945e+06	1	531400	5	953	58	2
1843500	165	562500	Roslyn	4001	Papaioea Ward	40	Palmerston North City	08	Manawatu-Wanganui Region	2.73359e+06	6.09243e+06	1	1843500	6	982	58	2
1842000	63	562500	Roslyn	4001	Papaioea Ward	40	Palmerston North City	08	Manawatu-Wanganui Region	2.73378e+06	6.09312e+06	1	1842000	10	1169	28	3
1842300	93	562500	Roslyn	4001	Papaioea Ward	40	Palmerston North City	08	Manawatu-Wanganui Region	2.73388e+06	6.09299e+06	1	1842300	10	1273	42	3
662300	240	522201	Papatoetoe North	802	Papatoetoe Ward	8	Manukau City	02	Auckland Region	2.67578e+06	6.46866e+06	1	662300	8	1056	108	3
984408	186	527915	Lake Cameron	1701	Pirongia Ward	17	Waipa District	03	Waikato Region	2.71227e+06	6.37096e+06	1	984408	3	935	61	1
2104800	78	574700	Wilton-Otari	4702	Onslow-Western Ward	47	Wellington City	09	Wellington Region	2.65775e+06	5.99317e+06	1	2104800	1	885	26	1
2891201	15	603500	Woodhaugh	7104	Hills Ward	71	Dunedin City	14	Otago Region	2.31636e+06	5.48086e+06	1	2891201	6	993	5	2
8403	9	500302	Kaitaia East	101	Northern Ward	1	Far North District	01	Northland Region	2.5344e+06	6.67873e+06	1	8403	9	1111	4	3
8501	42	500204	Herekino	101	Northern Ward	1	Far North District	01	Northland Region	2.53688e+06	6.67691e+06	1	8501	5	960	15	2
1843100	87	562500	Roslyn	4001	Papaioea Ward	40	Palmerston North City	08	Manawatu-Wanganui Region	2.73355e+06	6.09231e+06	1	1843100	5	972	30	2
1842902	21	562500	Roslyn	4001	Papaioea Ward	40	Palmerston North City	08	Manawatu-Wanganui Region	2.73333e+06	6.09239e+06	1	1842902	9	1103	9	3
1842600	63	562500	Roslyn	4001	Papaioea Ward	40	Palmerston North City	08	Manawatu-Wanganui Region	2.73312e+06	6.09241e+06	1	1842600	9	1093	28	3
1714400	27	555800	Castlecliff South	3702	Urban Ward	37	Wanganui District	08	Manawatu-Wanganui Region	2.68049e+06	6.1385e+06	1	1714400	10	1197	12	3
1716000	135	555900	Mosston	3702	Urban Ward	37	Wanganui District	08	Manawatu-Wanganui Region	2.68099e+06	6.13858e+06	1	1716000	9	1098	61	3
2894300	54	603710	Maori Hill	7104	Hills Ward	71	Dunedin City	14	Otago Region	2.31559e+06	5.48014e+06	1	2894300	1	889	18	1
1978002	48	568702	Waiwhetu South	4602	Harbour Ward	46	Lower Hutt City	09	Wellington Region	2.67066e+06	5.9961e+06	1	1978002	4	947	17	2
1976700	84	568701	Waiwhetu North	4605	Eastern Ward	46	Lower Hutt City	09	Wellington Region	2.67071e+06	5.99671e+06	1	1976700	5	962	29	2
665500	336	522202	Papatoetoe Central	802	Papatoetoe Ward	8	Manukau City	02	Auckland Region	2.67661e+06	6.46739e+06	1	665500	8	1066	151	3
1846900	69	562600	Terrace End	4005	Hokowhitu Ward	40	Palmerston North City	08	Manawatu-Wanganui Region	2.73344e+06	6.09181e+06	1	1846900	5	962	24	2
1844800	207	562500	Roslyn	4001	Papaioea Ward	40	Palmerston North City	08	Manawatu-Wanganui Region	2.73404e+06	6.09267e+06	1	1844800	5	973	72	2
2631200	201	595300	Hillmorton	6006	Spreydon-Heathcote Ward	60	Christchurch City	13	Canterbury Region	2.47687e+06	5.73822e+06	1	2631200	10	1163	90	3
2894000	36	603710	Maori Hill	7104	Hills Ward	71	Dunedin City	14	Otago Region	2.31552e+06	5.48004e+06	1	2894000	1	889	12	1
2893900	51	603710	Maori Hill	7104	Hills Ward	71	Dunedin City	14	Otago Region	2.31583e+06	5.47997e+06	1	2893900	1	888	17	1
1975800	93	568701	Waiwhetu North	4605	Eastern Ward	46	Lower Hutt City	09	Wellington Region	2.67084e+06	5.99662e+06	1	1975800	7	1009	33	2
1976500	147	568701	Waiwhetu North	4605	Eastern Ward	46	Lower Hutt City	09	Wellington Region	2.67054e+06	5.99684e+06	1	1976500	2	909	49	1
2631300	174	595300	Hillmorton	6006	Spreydon-Heathcote Ward	60	Christchurch City	13	Canterbury Region	2.47687e+06	5.7388e+06	1	2631300	8	1039	78	3
1713200	120	555700	Castlecliff North	3702	Urban Ward	37	Wanganui District	08	Manawatu-Wanganui Region	2.67966e+06	6.1389e+06	1	1713200	9	1090	54	3
1712700	117	555700	Castlecliff North	3702	Urban Ward	37	Wanganui District	08	Manawatu-Wanganui Region	2.67932e+06	6.13899e+06	1	1712700	10	1157	53	3
665400	261	522202	Papatoetoe Central	802	Papatoetoe Ward	8	Manukau City	02	Auckland Region	2.67674e+06	6.46763e+06	1	665400	8	1040	117	3
1845001	87	562500	Roslyn	4001	Papaioea Ward	40	Palmerston North City	08	Manawatu-Wanganui Region	2.73426e+06	6.09264e+06	1	1845001	8	1060	39	3
1844201	105	562500	Roslyn	4001	Papaioea Ward	40	Palmerston North City	08	Manawatu-Wanganui Region	2.73406e+06	6.09317e+06	1	1844201	9	1098	47	3
2631700	198	595300	Hillmorton	6006	Spreydon-Heathcote Ward	60	Christchurch City	13	Canterbury Region	2.47712e+06	5.73898e+06	1	2631700	6	987	69	2
1712600	66	555700	Castlecliff North	3702	Urban Ward	37	Wanganui District	08	Manawatu-Wanganui Region	2.67917e+06	6.13888e+06	1	1712600	9	1130	30	3
1713100	69	555700	Castlecliff North	3702	Urban Ward	37	Wanganui District	08	Manawatu-Wanganui Region	2.67951e+06	6.13882e+06	1	1713100	9	1093	31	3
1714100	48	555800	Castlecliff South	3702	Urban Ward	37	Wanganui District	08	Manawatu-Wanganui Region	2.67963e+06	6.13825e+06	1	1714100	9	1111	22	3
2893400	138	603710	Maori Hill	7104	Hills Ward	71	Dunedin City	14	Otago Region	2.31591e+06	5.48026e+06	1	2893400	2	912	46	1
2893300	75	603710	Maori Hill	7104	Hills Ward	71	Dunedin City	14	Otago Region	2.31616e+06	5.48032e+06	1	2893300	3	934	25	1
1975900	84	568701	Waiwhetu North	4605	Eastern Ward	46	Lower Hutt City	09	Wellington Region	2.67075e+06	5.99649e+06	1	1975900	7	1009	29	2
613200	144	520202	Ellerslie South	706	Tamaki-Maungakiekie Ward	7	Auckland City	02	Auckland Region	2.67094e+06	6.47704e+06	1	613200	3	929	48	1
1844000	78	562500	Roslyn	4001	Papaioea Ward	40	Palmerston North City	08	Manawatu-Wanganui Region	2.73396e+06	6.09245e+06	1	1844000	10	1161	35	3
1844300	39	562500	Roslyn	4001	Papaioea Ward	40	Palmerston North City	08	Manawatu-Wanganui Region	2.73401e+06	6.09302e+06	1	1844300	9	1098	18	3
2630600	228	595300	Hillmorton	6006	Spreydon-Heathcote Ward	60	Christchurch City	13	Canterbury Region	2.47662e+06	5.73823e+06	1	2630600	7	1027	80	2
2631400	159	595300	Hillmorton	6006	Spreydon-Heathcote Ward	60	Christchurch City	13	Canterbury Region	2.47684e+06	5.73857e+06	1	2631400	10	1180	72	3
1713800	132	555800	Castlecliff South	3702	Urban Ward	37	Wanganui District	08	Manawatu-Wanganui Region	2.67982e+06	6.13866e+06	1	1713800	8	1068	59	3
1712900	102	555700	Castlecliff North	3702	Urban Ward	37	Wanganui District	08	Manawatu-Wanganui Region	2.67932e+06	6.13869e+06	1	1712900	10	1255	46	3
1714300	84	555800	Castlecliff South	3702	Urban Ward	37	Wanganui District	08	Manawatu-Wanganui Region	2.68019e+06	6.13853e+06	1	1714300	9	1111	38	3
2892700	114	603710	Maori Hill	7104	Hills Ward	71	Dunedin City	14	Otago Region	2.3159e+06	5.48064e+06	1	2892700	3	918	38	1
665602	126	522202	Papatoetoe Central	802	Papatoetoe Ward	8	Manukau City	02	Auckland Region	2.67688e+06	6.46744e+06	1	665602	9	1095	57	3
1844900	111	562500	Roslyn	4001	Papaioea Ward	40	Palmerston North City	08	Manawatu-Wanganui Region	2.73427e+06	6.09279e+06	1	1844900	8	1060	50	3
1844700	108	562500	Roslyn	4001	Papaioea Ward	40	Palmerston North City	08	Manawatu-Wanganui Region	2.73424e+06	6.09291e+06	1	1844700	9	1095	49	3
1844600	51	562500	Roslyn	4001	Papaioea Ward	40	Palmerston North City	08	Manawatu-Wanganui Region	2.73411e+06	6.09284e+06	1	1844600	9	1095	23	3
2631100	60	595300	Hillmorton	6006	Spreydon-Heathcote Ward	60	Christchurch City	13	Canterbury Region	2.4769e+06	5.73832e+06	1	2631100	10	1193	27	3
533502	78	517600	St Lukes	703	Eden-Albert Ward	7	Auckland City	02	Auckland Region	2.66527e+06	6.47993e+06	1	533502	5	959	27	2
2630200	87	595300	Hillmorton	6006	Spreydon-Heathcote Ward	60	Christchurch City	13	Canterbury Region	2.4764e+06	5.73858e+06	1	2630200	6	982	30	2
2630400	204	595300	Hillmorton	6006	Spreydon-Heathcote Ward	60	Christchurch City	13	Canterbury Region	2.47647e+06	5.7385e+06	1	2630400	6	996	71	2
1713700	96	555800	Castlecliff South	3702	Urban Ward	37	Wanganui District	08	Manawatu-Wanganui Region	2.67964e+06	6.13853e+06	1	1713700	9	1086	43	3
1712800	72	555700	Castlecliff North	3702	Urban Ward	37	Wanganui District	08	Manawatu-Wanganui Region	2.67956e+06	6.13911e+06	1	1712800	9	1093	32	3
2893700	138	603710	Maori Hill	7104	Hills Ward	71	Dunedin City	14	Otago Region	2.31594e+06	5.48001e+06	1	2893700	1	898	46	1
2893100	99	603710	Maori Hill	7104	Hills Ward	71	Dunedin City	14	Otago Region	2.31604e+06	5.48056e+06	1	2893100	5	956	35	2
2892600	42	603710	Maori Hill	7104	Hills Ward	71	Dunedin City	14	Otago Region	2.31564e+06	5.48057e+06	1	2892600	3	923	14	1
2892800	69	603710	Maori Hill	7104	Hills Ward	71	Dunedin City	14	Otago Region	2.31575e+06	5.48056e+06	1	2892800	2	902	23	1
1976000	138	568701	Waiwhetu North	4605	Eastern Ward	46	Lower Hutt City	09	Wellington Region	2.6707e+06	5.99636e+06	1	1976000	8	1048	62	3
665601	45	522202	Papatoetoe Central	802	Papatoetoe Ward	8	Manukau City	02	Auckland Region	2.67674e+06	6.46744e+06	1	665601	9	1095	20	3
665300	300	522202	Papatoetoe Central	802	Papatoetoe Ward	8	Manukau City	02	Auckland Region	2.67646e+06	6.4676e+06	1	665300	8	1052	135	3
534500	186	517600	St Lukes	703	Eden-Albert Ward	7	Auckland City	02	Auckland Region	2.66479e+06	6.47928e+06	1	534500	6	975	65	2
2630700	141	595300	Hillmorton	6006	Spreydon-Heathcote Ward	60	Christchurch City	13	Canterbury Region	2.47646e+06	5.73814e+06	1	2630700	9	1097	63	3
2631600	102	595300	Hillmorton	6006	Spreydon-Heathcote Ward	60	Christchurch City	13	Canterbury Region	2.47717e+06	5.73846e+06	1	2631600	4	942	36	2
1713600	3	555800	Castlecliff South	3702	Urban Ward	37	Wanganui District	08	Manawatu-Wanganui Region	2.67946e+06	6.13842e+06	1	1713600	9	1086	1	3
1714200	108	555800	Castlecliff South	3702	Urban Ward	37	Wanganui District	08	Manawatu-Wanganui Region	2.67982e+06	6.13839e+06	1	1714200	10	1288	49	3
1713300	132	555700	Castlecliff North	3702	Urban Ward	37	Wanganui District	08	Manawatu-Wanganui Region	2.67981e+06	6.13899e+06	1	1713300	9	1135	59	3
2893000	30	603710	Maori Hill	7104	Hills Ward	71	Dunedin City	14	Otago Region	2.31587e+06	5.48043e+06	1	2893000	5	956	10	2
2893200	162	603710	Maori Hill	7104	Hills Ward	71	Dunedin City	14	Otago Region	2.31608e+06	5.48042e+06	1	2893200	4	947	57	2
2892900	63	603710	Maori Hill	7104	Hills Ward	71	Dunedin City	14	Otago Region	2.31575e+06	5.48037e+06	1	2892900	2	902	21	1
534602	9	517600	St Lukes	703	Eden-Albert Ward	7	Auckland City	02	Auckland Region	2.66505e+06	6.47932e+06	1	534602	2	908	3	1
665101	150	522202	Papatoetoe Central	802	Papatoetoe Ward	8	Manukau City	02	Auckland Region	2.67638e+06	6.46795e+06	1	665101	8	1070	68	3
1843901	78	562500	Roslyn	4001	Papaioea Ward	40	Palmerston North City	08	Manawatu-Wanganui Region	2.73384e+06	6.09264e+06	1	1843901	8	1068	35	3
1843902	33	562500	Roslyn	4001	Papaioea Ward	40	Palmerston North City	08	Manawatu-Wanganui Region	2.73392e+06	6.09266e+06	1	1843902	8	1068	15	3
1843800	63	562500	Roslyn	4001	Papaioea Ward	40	Palmerston North City	08	Manawatu-Wanganui Region	2.73374e+06	6.09266e+06	1	1843800	10	1161	28	3
926600	120	529300	Glenview	1603	South Ward	16	Hamilton City	03	Waikato Region	2.71132e+06	6.3733e+06	1	926600	6	987	42	2
2630500	168	595300	Hillmorton	6006	Spreydon-Heathcote Ward	60	Christchurch City	13	Canterbury Region	2.47638e+06	5.73834e+06	1	2630500	6	995	59	2
2120600	66	572900	Thorndon-Tinakori Road	4703	Lambton Ward	47	Wellington City	09	Wellington Region	2.65883e+06	5.99129e+06	1	2120600	3	934	22	1
2631000	123	595300	Hillmorton	6006	Spreydon-Heathcote Ward	60	Christchurch City	13	Canterbury Region	2.4768e+06	5.7384e+06	1	2631000	10	1193	55	3
533100	180	517600	St Lukes	703	Eden-Albert Ward	7	Auckland City	02	Auckland Region	2.66502e+06	6.47989e+06	1	533100	6	977	63	2
2631800	96	595300	Hillmorton	6006	Spreydon-Heathcote Ward	60	Christchurch City	13	Canterbury Region	2.47739e+06	5.73904e+06	1	2631800	5	955	34	2
2645000	81	595000	Spreydon	6006	Spreydon-Heathcote Ward	60	Christchurch City	13	Canterbury Region	2.48005e+06	5.73939e+06	1	2645000	7	1027	28	2
1976300	60	568701	Waiwhetu North	4605	Eastern Ward	46	Lower Hutt City	09	Wellington Region	2.6709e+06	5.99628e+06	1	1976300	8	1048	27	3
1975700	156	568701	Waiwhetu North	4605	Eastern Ward	46	Lower Hutt City	09	Wellington Region	2.67063e+06	5.9965e+06	1	1975700	10	1169	70	3
1845400	57	562600	Terrace End	4005	Hokowhitu Ward	40	Palmerston North City	08	Manawatu-Wanganui Region	2.73475e+06	6.09242e+06	1	1845400	7	1016	20	2
1844400	99	562500	Roslyn	4001	Papaioea Ward	40	Palmerston North City	08	Manawatu-Wanganui Region	2.73416e+06	6.09309e+06	1	1844400	9	1110	45	3
1844500	36	562500	Roslyn	4001	Papaioea Ward	40	Palmerston North City	08	Manawatu-Wanganui Region	2.73429e+06	6.09307e+06	1	1844500	9	1110	16	3
2630800	219	595300	Hillmorton	6006	Spreydon-Heathcote Ward	60	Christchurch City	13	Canterbury Region	2.47652e+06	5.738e+06	1	2630800	9	1135	99	3
926800	132	529300	Glenview	1603	South Ward	16	Hamilton City	03	Waikato Region	2.71159e+06	6.37314e+06	1	926800	3	926	44	1
926700	138	529300	Glenview	1603	South Ward	16	Hamilton City	03	Waikato Region	2.71131e+06	6.37316e+06	1	926700	7	1011	48	2
1713900	66	555800	Castlecliff South	3702	Urban Ward	37	Wanganui District	08	Manawatu-Wanganui Region	2.67998e+06	6.13875e+06	1	1713900	8	1033	30	3
1713000	90	555700	Castlecliff North	3702	Urban Ward	37	Wanganui District	08	Manawatu-Wanganui Region	2.67943e+06	6.13876e+06	1	1713000	9	1130	40	3
2893800	129	603710	Maori Hill	7104	Hills Ward	71	Dunedin City	14	Otago Region	2.31542e+06	5.48021e+06	1	2893800	2	901	43	1
2893500	93	603710	Maori Hill	7104	Hills Ward	71	Dunedin City	14	Otago Region	2.31605e+06	5.48014e+06	1	2893500	3	934	31	1
1976400	129	568701	Waiwhetu North	4605	Eastern Ward	46	Lower Hutt City	09	Wellington Region	2.6713e+06	5.99615e+06	1	1976400	5	964	45	2
1976200	69	568701	Waiwhetu North	4605	Eastern Ward	46	Lower Hutt City	09	Wellington Region	2.67099e+06	5.99645e+06	1	1976200	8	1057	31	3
1976101	51	568701	Waiwhetu North	4605	Eastern Ward	46	Lower Hutt City	09	Wellington Region	2.67085e+06	5.99645e+06	1	1976101	8	1057	23	3
1843700	63	562500	Roslyn	4001	Papaioea Ward	40	Palmerston North City	08	Manawatu-Wanganui Region	2.73379e+06	6.09236e+06	1	1843700	8	1068	28	3
9001	33	500204	Herekino	101	Northern Ward	1	Far North District	01	Northland Region	2.53327e+06	6.67382e+06	1	9001	9	1077	15	3
9002	3	500301	Kaitaia West	101	Northern Ward	1	Far North District	01	Northland Region	2.53392e+06	6.675e+06	1	9002	9	1111	1	3
533700	90	517600	St Lukes	703	Eden-Albert Ward	7	Auckland City	02	Auckland Region	2.66523e+06	6.47946e+06	1	533700	5	959	31	2
9102	51	500301	Kaitaia West	101	Northern Ward	1	Far North District	01	Northland Region	2.53381e+06	6.67481e+06	1	9102	9	1111	23	3
534400	198	517600	St Lukes	703	Eden-Albert Ward	7	Auckland City	02	Auckland Region	2.66447e+06	6.47904e+06	1	534400	7	1000	69	2
2631500	129	595300	Hillmorton	6006	Spreydon-Heathcote Ward	60	Christchurch City	13	Canterbury Region	2.47704e+06	5.73857e+06	1	2631500	6	993	45	2
1716202	132	555900	Mosston	3702	Urban Ward	37	Wanganui District	08	Manawatu-Wanganui Region	2.68142e+06	6.13868e+06	1	1716202	10	1259	59	3
668901	99	522302	Papatoetoe East	802	Papatoetoe Ward	8	Manukau City	02	Auckland Region	2.67679e+06	6.46806e+06	1	668901	8	1067	45	3
406400	222	515431	Surrey Crescent	701	Western Bays Ward	7	Auckland City	02	Auckland Region	2.66496e+06	6.48024e+06	1	406400	9	1093	100	3
1846700	171	562600	Terrace End	4005	Hokowhitu Ward	40	Palmerston North City	08	Manawatu-Wanganui Region	2.73394e+06	6.09213e+06	1	1846700	6	995	60	2
1846400	81	562600	Terrace End	4005	Hokowhitu Ward	40	Palmerston North City	08	Manawatu-Wanganui Region	2.73412e+06	6.09228e+06	1	1846400	6	976	28	2
667400	123	522301	Dingwall	802	Papatoetoe Ward	8	Manukau City	02	Auckland Region	2.67638e+06	6.46822e+06	1	667400	7	1027	43	2
666301	30	522301	Dingwall	802	Papatoetoe Ward	8	Manukau City	02	Auckland Region	2.67616e+06	6.46887e+06	1	666301	7	1002	10	2
665800	111	522301	Dingwall	802	Papatoetoe Ward	8	Manukau City	02	Auckland Region	2.67566e+06	6.46907e+06	1	665800	6	991	39	2
535100	165	517600	St Lukes	703	Eden-Albert Ward	7	Auckland City	02	Auckland Region	2.66468e+06	6.47881e+06	1	535100	6	990	58	2
2633300	81	595100	Hoon Hay	6006	Spreydon-Heathcote Ward	60	Christchurch City	13	Canterbury Region	2.47784e+06	5.73855e+06	1	2633300	5	962	28	2
2632900	120	595100	Hoon Hay	6006	Spreydon-Heathcote Ward	60	Christchurch City	13	Canterbury Region	2.47749e+06	5.73853e+06	1	2632900	6	996	42	2
2631900	231	595300	Hillmorton	6006	Spreydon-Heathcote Ward	60	Christchurch City	13	Canterbury Region	2.4774e+06	5.7387e+06	1	2631900	5	960	81	2
535700	162	517701	Sandringham North	703	Eden-Albert Ward	7	Auckland City	02	Auckland Region	2.66537e+06	6.4789e+06	1	535700	3	933	53	1
2895600	12	602900	Fernhill	7103	Cargill Ward	71	Dunedin City	14	Otago Region	2.31603e+06	5.47789e+06	1	2895600	7	1024	4	2
2895000	6	602800	Harbourside	7103	Cargill Ward	71	Dunedin City	14	Otago Region	2.31626e+06	5.47744e+06	1	2895000	9	1096	3	3
1714900	78	555800	Castlecliff South	3702	Urban Ward	37	Wanganui District	08	Manawatu-Wanganui Region	2.68059e+06	6.13845e+06	1	1714900	10	1197	35	3
404800	24	515420	Grey Lynn East	701	Western Bays Ward	7	Auckland City	02	Auckland Region	2.66549e+06	6.48022e+06	1	404800	5	969	8	2
535300	123	517600	St Lukes	703	Eden-Albert Ward	7	Auckland City	02	Auckland Region	2.66475e+06	6.47861e+06	1	535300	5	966	43	2
2633200	126	595100	Hoon Hay	6006	Spreydon-Heathcote Ward	60	Christchurch City	13	Canterbury Region	2.47756e+06	5.73841e+06	1	2633200	6	992	44	2
2895500	18	602900	Fernhill	7103	Cargill Ward	71	Dunedin City	14	Otago Region	2.31587e+06	5.47786e+06	1	2895500	7	1024	6	2
1715100	162	555800	Castlecliff South	3702	Urban Ward	37	Wanganui District	08	Manawatu-Wanganui Region	2.68091e+06	6.13835e+06	1	1715100	10	1208	73	3
2894100	63	603710	Maori Hill	7104	Hills Ward	71	Dunedin City	14	Otago Region	2.3155e+06	5.47992e+06	1	2894100	1	889	21	1
534900	75	517600	St Lukes	703	Eden-Albert Ward	7	Auckland City	02	Auckland Region	2.66456e+06	6.4789e+06	1	534900	7	1010	26	2
1977700	84	568702	Waiwhetu South	4602	Harbour Ward	46	Lower Hutt City	09	Wellington Region	2.67043e+06	5.99628e+06	1	1977700	10	1251	38	3
1977900	96	568702	Waiwhetu South	4602	Harbour Ward	46	Lower Hutt City	09	Wellington Region	2.67058e+06	5.99628e+06	1	1977900	6	995	34	2
1976900	90	568701	Waiwhetu North	4605	Eastern Ward	46	Lower Hutt City	09	Wellington Region	2.67031e+06	5.99652e+06	1	1976900	9	1134	40	3
666800	30	522301	Dingwall	802	Papatoetoe Ward	8	Manukau City	02	Auckland Region	2.67612e+06	6.46869e+06	1	666800	9	1096	14	3
666302	114	522301	Dingwall	802	Papatoetoe Ward	8	Manukau City	02	Auckland Region	2.67609e+06	6.46901e+06	1	666302	7	1002	40	2
2632600	126	595100	Hoon Hay	6006	Spreydon-Heathcote Ward	60	Christchurch City	13	Canterbury Region	2.47753e+06	5.73794e+06	1	2632600	4	947	44	2
1715500	165	555900	Mosston	3702	Urban Ward	37	Wanganui District	08	Manawatu-Wanganui Region	2.68071e+06	6.13888e+06	1	1715500	10	1157	74	3
1714700	3	555800	Castlecliff South	3702	Urban Ward	37	Wanganui District	08	Manawatu-Wanganui Region	2.68e+06	6.13827e+06	1	1714700	10	1223	1	3
1715200	93	555800	Castlecliff South	3702	Urban Ward	37	Wanganui District	08	Manawatu-Wanganui Region	2.6809e+06	6.13824e+06	1	1715200	10	1176	42	3
1715800	108	555900	Mosston	3702	Urban Ward	37	Wanganui District	08	Manawatu-Wanganui Region	2.68114e+06	6.13883e+06	1	1715800	10	1325	49	3
2371000	111	584301	Motueka West	5104	Motueka Ward	51	Tasman District	16	Tasman Region	2.50939e+06	6.00733e+06	1	2371000	5	959	39	2
2894200	111	603710	Maori Hill	7104	Hills Ward	71	Dunedin City	14	Otago Region	2.31572e+06	5.47973e+06	1	2894200	2	903	37	1
1976600	102	568701	Waiwhetu North	4605	Eastern Ward	46	Lower Hutt City	09	Wellington Region	2.67063e+06	5.99679e+06	1	1976600	5	962	36	2
1846800	108	562600	Terrace End	4005	Hokowhitu Ward	40	Palmerston North City	08	Manawatu-Wanganui Region	2.73343e+06	6.09199e+06	1	1846800	8	1055	49	3
1846600	150	562600	Terrace End	4005	Hokowhitu Ward	40	Palmerston North City	08	Manawatu-Wanganui Region	2.73378e+06	6.09199e+06	1	1846600	7	1024	52	2
1846200	114	562600	Terrace End	4005	Hokowhitu Ward	40	Palmerston North City	08	Manawatu-Wanganui Region	2.73446e+06	6.09241e+06	1	1846200	7	1001	40	2
666900	120	522301	Dingwall	802	Papatoetoe Ward	8	Manukau City	02	Auckland Region	2.67625e+06	6.4686e+06	1	666900	9	1096	54	3
2632500	87	595100	Hoon Hay	6006	Spreydon-Heathcote Ward	60	Christchurch City	13	Canterbury Region	2.47747e+06	5.73791e+06	1	2632500	4	947	30	2
2633000	141	595100	Hoon Hay	6006	Spreydon-Heathcote Ward	60	Christchurch City	13	Canterbury Region	2.47769e+06	5.73866e+06	1	2633000	4	952	49	2
1715900	120	555900	Mosston	3702	Urban Ward	37	Wanganui District	08	Manawatu-Wanganui Region	2.68104e+06	6.13869e+06	1	1715900	10	1166	54	3
1715600	42	555900	Mosston	3702	Urban Ward	37	Wanganui District	08	Manawatu-Wanganui Region	2.68075e+06	6.13879e+06	1	1715600	10	1221	19	3
1714500	6	555800	Castlecliff South	3702	Urban Ward	37	Wanganui District	08	Manawatu-Wanganui Region	2.68074e+06	6.13866e+06	1	1714500	10	1197	3	3
536000	72	517701	Sandringham North	703	Eden-Albert Ward	7	Auckland City	02	Auckland Region	2.66498e+06	6.47863e+06	1	536000	7	1011	25	2
1847000	195	562600	Terrace End	4005	Hokowhitu Ward	40	Palmerston North City	08	Manawatu-Wanganui Region	2.73356e+06	6.09178e+06	1	1847000	8	1055	88	3
1846300	72	562600	Terrace End	4005	Hokowhitu Ward	40	Palmerston North City	08	Manawatu-Wanganui Region	2.73423e+06	6.09231e+06	1	1846300	6	976	25	2
535600	285	517701	Sandringham North	703	Eden-Albert Ward	7	Auckland City	02	Auckland Region	2.66511e+06	6.47883e+06	1	535600	7	1011	100	2
535400	126	517600	St Lukes	703	Eden-Albert Ward	7	Auckland City	02	Auckland Region	2.66488e+06	6.47874e+06	1	535400	6	997	44	2
666200	105	522301	Dingwall	802	Papatoetoe Ward	8	Manukau City	02	Auckland Region	2.67598e+06	6.46887e+06	1	666200	8	1032	47	3
2633500	147	595100	Hoon Hay	6006	Spreydon-Heathcote Ward	60	Christchurch City	13	Canterbury Region	2.4777e+06	5.73818e+06	1	2633500	4	951	51	2
2371100	39	584301	Motueka West	5104	Motueka Ward	51	Tasman District	16	Tasman Region	2.50944e+06	6.00684e+06	1	2371100	6	989	14	2
1978001	57	568702	Waiwhetu South	4602	Harbour Ward	46	Lower Hutt City	09	Wellington Region	2.67057e+06	5.99606e+06	1	1978001	4	947	20	2
1977800	81	568702	Waiwhetu South	4602	Harbour Ward	46	Lower Hutt City	09	Wellington Region	2.6704e+06	5.99606e+06	1	1977800	6	995	28	2
1977400	105	568702	Waiwhetu South	4602	Harbour Ward	46	Lower Hutt City	09	Wellington Region	2.67027e+06	5.99638e+06	1	1977400	8	1036	47	3
666000	69	522301	Dingwall	802	Papatoetoe Ward	8	Manukau City	02	Auckland Region	2.67591e+06	6.46917e+06	1	666000	7	1002	24	2
665900	117	522301	Dingwall	802	Papatoetoe Ward	8	Manukau City	02	Auckland Region	2.67565e+06	6.46927e+06	1	665900	8	1041	53	3
2632100	54	595300	Hillmorton	6006	Spreydon-Heathcote Ward	60	Christchurch City	13	Canterbury Region	2.47699e+06	5.73808e+06	1	2632100	5	955	19	2
1715000	168	555800	Castlecliff South	3702	Urban Ward	37	Wanganui District	08	Manawatu-Wanganui Region	2.68095e+06	6.13847e+06	1	1715000	10	1158	76	3
1977300	321	568702	Waiwhetu South	4602	Harbour Ward	46	Lower Hutt City	09	Wellington Region	2.67002e+06	5.99624e+06	1	1977300	10	1154	144	3
1977000	60	568701	Waiwhetu North	4605	Eastern Ward	46	Lower Hutt City	09	Wellington Region	2.67036e+06	5.99655e+06	1	1977000	9	1134	27	3
666100	228	522301	Dingwall	802	Papatoetoe Ward	8	Manukau City	02	Auckland Region	2.67584e+06	6.46906e+06	1	666100	7	1018	80	2
535000	117	517600	St Lukes	703	Eden-Albert Ward	7	Auckland City	02	Auckland Region	2.66449e+06	6.47877e+06	1	535000	8	1048	53	3
2633400	168	595100	Hoon Hay	6006	Spreydon-Heathcote Ward	60	Christchurch City	13	Canterbury Region	2.47768e+06	5.73835e+06	1	2633400	5	966	59	2
2632000	12	595300	Hillmorton	6006	Spreydon-Heathcote Ward	60	Christchurch City	13	Canterbury Region	2.47767e+06	5.73884e+06	1	2632000	6	987	4	2
2633100	132	595100	Hoon Hay	6006	Spreydon-Heathcote Ward	60	Christchurch City	13	Canterbury Region	2.47789e+06	5.7387e+06	1	2633100	2	914	44	1
1977500	87	568702	Waiwhetu South	4602	Harbour Ward	46	Lower Hutt City	09	Wellington Region	2.67024e+06	5.99629e+06	1	1977500	7	1001	30	2
1977100	30	568701	Waiwhetu North	4605	Eastern Ward	46	Lower Hutt City	09	Wellington Region	2.67023e+06	5.99649e+06	1	1977100	9	1134	14	3
535200	480	517600	St Lukes	703	Eden-Albert Ward	7	Auckland City	02	Auckland Region	2.66462e+06	6.47853e+06	1	535200	7	1005	168	2
666400	99	522301	Dingwall	802	Papatoetoe Ward	8	Manukau City	02	Auckland Region	2.67634e+06	6.46897e+06	1	666400	8	1032	45	3
404700	45	515420	Grey Lynn East	701	Western Bays Ward	7	Auckland City	02	Auckland Region	2.66539e+06	6.48031e+06	1	404700	6	979	16	2
2632202	117	595300	Hillmorton	6006	Spreydon-Heathcote Ward	60	Christchurch City	13	Canterbury Region	2.4768e+06	5.73803e+06	1	2632202	7	1027	41	2
2632800	27	595100	Hoon Hay	6006	Spreydon-Heathcote Ward	60	Christchurch City	13	Canterbury Region	2.47737e+06	5.73843e+06	1	2632800	5	962	9	2
2632400	90	595100	Hoon Hay	6006	Spreydon-Heathcote Ward	60	Christchurch City	13	Canterbury Region	2.47737e+06	5.73819e+06	1	2632400	6	986	31	2
2120800	87	572900	Thorndon-Tinakori Road	4703	Lambton Ward	47	Wellington City	09	Wellington Region	2.65878e+06	5.99119e+06	1	2120800	3	934	29	1
1239900	54	540520	Glenholme West	2403	East Ward	24	Rotorua District	04	Bay of Plenty Region	2.79461e+06	6.33435e+06	1	1239900	10	1264	24	3
2894800	27	602800	Harbourside	7103	Cargill Ward	71	Dunedin City	14	Otago Region	2.31657e+06	5.47819e+06	1	2894800	9	1096	12	3
2895300	24	602900	Fernhill	7103	Cargill Ward	71	Dunedin City	14	Otago Region	2.31616e+06	5.4781e+06	1	2895300	7	1024	8	2
1715300	21	555800	Castlecliff South	3702	Urban Ward	37	Wanganui District	08	Manawatu-Wanganui Region	2.68083e+06	6.13818e+06	1	1715300	10	1176	9	3
1715700	54	555900	Mosston	3702	Urban Ward	37	Wanganui District	08	Manawatu-Wanganui Region	2.68097e+06	6.13884e+06	1	1715700	9	1123	24	3
1714600	72	555800	Castlecliff South	3702	Urban Ward	37	Wanganui District	08	Manawatu-Wanganui Region	2.67979e+06	6.13818e+06	1	1714600	10	1223	32	3
2370900	54	584301	Motueka West	5104	Motueka Ward	51	Tasman District	16	Tasman Region	2.50942e+06	6.00805e+06	1	2370900	6	989	19	2
1978100	54	568702	Waiwhetu South	4602	Harbour Ward	46	Lower Hutt City	09	Wellington Region	2.67032e+06	5.99592e+06	1	1978100	7	1027	19	2
1977600	168	568702	Waiwhetu South	4602	Harbour Ward	46	Lower Hutt City	09	Wellington Region	2.67019e+06	5.99617e+06	1	1977600	7	1028	59	2
667300	174	522301	Dingwall	802	Papatoetoe Ward	8	Manukau City	02	Auckland Region	2.67652e+06	6.46834e+06	1	667300	6	996	61	2
534800	57	517600	St Lukes	703	Eden-Albert Ward	7	Auckland City	02	Auckland Region	2.66484e+06	6.47902e+06	1	534800	7	1010	20	2
2895400	108	602900	Fernhill	7103	Cargill Ward	71	Dunedin City	14	Otago Region	2.31597e+06	5.47805e+06	1	2895400	7	1003	38	2
2898800	147	603000	High St-Stuart St	7103	Cargill Ward	71	Dunedin City	14	Otago Region	2.31552e+06	5.47869e+06	1	2898800	6	997	51	2
1717700	111	556400	Gonville West	3702	Urban Ward	37	Wanganui District	08	Manawatu-Wanganui Region	2.68195e+06	6.13865e+06	1	1717700	10	1287	50	3
1718300	102	556400	Gonville West	3702	Urban Ward	37	Wanganui District	08	Manawatu-Wanganui Region	2.68279e+06	6.13861e+06	1	1718300	10	1152	46	3
1718200	111	556400	Gonville West	3702	Urban Ward	37	Wanganui District	08	Manawatu-Wanganui Region	2.68254e+06	6.13859e+06	1	1718200	8	1052	50	3
1718000	108	556400	Gonville West	3702	Urban Ward	37	Wanganui District	08	Manawatu-Wanganui Region	2.68226e+06	6.13867e+06	1	1718000	10	1353	49	3
670600	171	522302	Papatoetoe East	802	Papatoetoe Ward	8	Manukau City	02	Auckland Region	2.67739e+06	6.46747e+06	1	670600	8	1064	77	3
667601	162	522301	Dingwall	802	Papatoetoe Ward	8	Manukau City	02	Auckland Region	2.67641e+06	6.46852e+06	1	667601	9	1073	73	3
2635700	27	595200	Hoon Hay South	6006	Spreydon-Heathcote Ward	60	Christchurch City	13	Canterbury Region	2.47901e+06	5.73694e+06	1	2635700	3	931	9	1
2635500	123	595200	Hoon Hay South	6006	Spreydon-Heathcote Ward	60	Christchurch City	13	Canterbury Region	2.47873e+06	5.7373e+06	1	2635500	3	927	41	1
2635801	33	595200	Hoon Hay South	6006	Spreydon-Heathcote Ward	60	Christchurch City	13	Canterbury Region	2.47835e+06	5.7375e+06	1	2635801	4	936	12	2
2635000	45	595200	Hoon Hay South	6006	Spreydon-Heathcote Ward	60	Christchurch City	13	Canterbury Region	2.47825e+06	5.73789e+06	1	2635000	3	932	15	1
2633900	87	595100	Hoon Hay	6006	Spreydon-Heathcote Ward	60	Christchurch City	13	Canterbury Region	2.47796e+06	5.73826e+06	1	2633900	3	920	29	1
2896400	114	602900	Fernhill	7103	Cargill Ward	71	Dunedin City	14	Otago Region	2.31552e+06	5.47736e+06	1	2896400	10	1202	51	3
1717500	159	556400	Gonville West	3702	Urban Ward	37	Wanganui District	08	Manawatu-Wanganui Region	2.68272e+06	6.13785e+06	1	1717500	9	1125	72	3
1716300	150	556000	Balgownie	3702	Urban Ward	37	Wanganui District	08	Manawatu-Wanganui Region	2.68137e+06	6.13848e+06	1	1716300	10	1302	68	3
1979500	3	568800	Gracefield	4602	Harbour Ward	46	Lower Hutt City	09	Wellington Region	2.66943e+06	5.99507e+06	1	1979500	10	1151	1	3
2633800	138	595100	Hoon Hay	6006	Spreydon-Heathcote Ward	60	Christchurch City	13	Canterbury Region	2.47774e+06	5.73802e+06	1	2633800	2	910	46	1
2896900	60	602900	Fernhill	7103	Cargill Ward	71	Dunedin City	14	Otago Region	2.31575e+06	5.47784e+06	1	2896900	7	1000	21	2
1716800	81	556400	Gonville West	3702	Urban Ward	37	Wanganui District	08	Manawatu-Wanganui Region	2.68259e+06	6.13836e+06	1	1716800	10	1273	36	3
1716700	141	556400	Gonville West	3702	Urban Ward	37	Wanganui District	08	Manawatu-Wanganui Region	2.68249e+06	6.13843e+06	1	1716700	10	1170	63	3
1716900	66	556400	Gonville West	3702	Urban Ward	37	Wanganui District	08	Manawatu-Wanganui Region	2.68229e+06	6.13824e+06	1	1716900	10	1273	30	3
2372801	69	584301	Motueka West	5104	Motueka Ward	51	Tasman District	16	Tasman Region	2.51058e+06	6.00778e+06	1	2372801	7	1029	24	2
1979301	93	568702	Waiwhetu South	4602	Harbour Ward	46	Lower Hutt City	09	Wellington Region	2.67002e+06	5.99598e+06	1	1979301	8	1057	42	3
406700	66	515431	Surrey Crescent	701	Western Bays Ward	7	Auckland City	02	Auckland Region	2.66502e+06	6.48011e+06	1	406700	5	966	23	2
2896600	87	602900	Fernhill	7103	Cargill Ward	71	Dunedin City	14	Otago Region	2.31548e+06	5.47716e+06	1	2896600	9	1134	39	3
1717100	66	556400	Gonville West	3702	Urban Ward	37	Wanganui District	08	Manawatu-Wanganui Region	2.68269e+06	6.13831e+06	1	1717100	10	1231	30	3
1978200	117	568702	Waiwhetu South	4602	Harbour Ward	46	Lower Hutt City	09	Wellington Region	2.67044e+06	5.99598e+06	1	1978200	7	1027	41	2
1979202	63	568702	Waiwhetu South	4602	Harbour Ward	46	Lower Hutt City	09	Wellington Region	2.67122e+06	5.99599e+06	1	1979202	5	954	22	2
668902	54	522302	Papatoetoe East	802	Papatoetoe Ward	8	Manukau City	02	Auckland Region	2.6767e+06	6.46788e+06	1	668902	8	1067	24	3
668700	264	522302	Papatoetoe East	802	Papatoetoe Ward	8	Manukau City	02	Auckland Region	2.67652e+06	6.46809e+06	1	668700	9	1133	119	3
668801	114	522302	Papatoetoe East	802	Papatoetoe Ward	8	Manukau City	02	Auckland Region	2.67667e+06	6.46806e+06	1	668801	8	1039	51	3
2897200	99	602900	Fernhill	7103	Cargill Ward	71	Dunedin City	14	Otago Region	2.31529e+06	5.47766e+06	1	2897200	9	1099	45	3
2896200	75	602900	Fernhill	7103	Cargill Ward	71	Dunedin City	14	Otago Region	2.31523e+06	5.4775e+06	1	2896200	9	1134	34	3
406502	63	515431	Surrey Crescent	701	Western Bays Ward	7	Auckland City	02	Auckland Region	2.66516e+06	6.48017e+06	1	406502	5	966	22	2
1979201	39	568702	Waiwhetu South	4602	Harbour Ward	46	Lower Hutt City	09	Wellington Region	2.6711e+06	5.99585e+06	1	1979201	5	965	14	2
1978800	117	568702	Waiwhetu South	4602	Harbour Ward	46	Lower Hutt City	09	Wellington Region	2.6709e+06	5.9961e+06	1	1978800	4	943	41	2
406800	87	515420	Grey Lynn East	701	Western Bays Ward	7	Auckland City	02	Auckland Region	2.66563e+06	6.48052e+06	1	406800	6	985	30	2
667602	21	522301	Dingwall	802	Papatoetoe Ward	8	Manukau City	02	Auckland Region	2.67631e+06	6.46836e+06	1	667602	9	1073	9	3
2634500	150	595100	Hoon Hay	6006	Spreydon-Heathcote Ward	60	Christchurch City	13	Canterbury Region	2.47857e+06	5.73824e+06	1	2634500	5	967	52	2
1717400	165	556400	Gonville West	3702	Urban Ward	37	Wanganui District	08	Manawatu-Wanganui Region	2.6827e+06	6.13797e+06	1	1717400	10	1241	74	3
1717300	105	556400	Gonville West	3702	Urban Ward	37	Wanganui District	08	Manawatu-Wanganui Region	2.68265e+06	6.1381e+06	1	1717300	10	1334	47	3
2896700	108	602900	Fernhill	7103	Cargill Ward	71	Dunedin City	14	Otago Region	2.31574e+06	5.478e+06	1	2896700	9	1099	49	3
1716100	75	555900	Mosston	3702	Urban Ward	37	Wanganui District	08	Manawatu-Wanganui Region	2.68126e+06	6.13856e+06	1	1716100	10	1221	34	3
1978900	138	568702	Waiwhetu South	4602	Harbour Ward	46	Lower Hutt City	09	Wellington Region	2.67113e+06	5.99607e+06	1	1978900	6	982	48	2
2634800	123	595100	Hoon Hay	6006	Spreydon-Heathcote Ward	60	Christchurch City	13	Canterbury Region	2.47811e+06	5.73809e+06	1	2634800	6	994	43	2
2634400	138	595100	Hoon Hay	6006	Spreydon-Heathcote Ward	60	Christchurch City	13	Canterbury Region	2.47844e+06	5.73817e+06	1	2634400	6	983	48	2
2896300	159	602900	Fernhill	7103	Cargill Ward	71	Dunedin City	14	Otago Region	2.3154e+06	5.47735e+06	1	2896300	10	1140	72	3
2896800	177	602900	Fernhill	7103	Cargill Ward	71	Dunedin City	14	Otago Region	2.31549e+06	5.47787e+06	1	2896800	9	1084	80	3
1716400	132	556000	Balgownie	3702	Urban Ward	37	Wanganui District	08	Manawatu-Wanganui Region	2.68135e+06	6.1383e+06	1	1716400	10	1303	59	3
1979203	54	568702	Waiwhetu South	4602	Harbour Ward	46	Lower Hutt City	09	Wellington Region	2.67139e+06	5.99607e+06	1	1979203	5	965	19	2
2634900	33	595100	Hoon Hay	6006	Spreydon-Heathcote Ward	60	Christchurch City	13	Canterbury Region	2.47833e+06	5.73807e+06	1	2634900	6	994	12	2
2633700	126	595100	Hoon Hay	6006	Spreydon-Heathcote Ward	60	Christchurch City	13	Canterbury Region	2.47809e+06	5.73837e+06	1	2633700	6	994	44	2
2895700	18	602900	Fernhill	7103	Cargill Ward	71	Dunedin City	14	Otago Region	2.31584e+06	5.4777e+06	1	2895700	7	1024	6	2
2897000	114	602900	Fernhill	7103	Cargill Ward	71	Dunedin City	14	Otago Region	2.31526e+06	5.47775e+06	1	2897000	7	1000	40	2
2897100	114	602900	Fernhill	7103	Cargill Ward	71	Dunedin City	14	Otago Region	2.31556e+06	5.47777e+06	1	2897100	8	1048	51	3
668802	33	522302	Papatoetoe East	802	Papatoetoe Ward	8	Manukau City	02	Auckland Region	2.67653e+06	6.46791e+06	1	668802	8	1039	15	3
667500	123	522301	Dingwall	802	Papatoetoe Ward	8	Manukau City	02	Auckland Region	2.67624e+06	6.46843e+06	1	667500	10	1143	55	3
274501	138	511601	Glendene North	603	Henderson Ward	6	Waitakere City	02	Auckland Region	2.65708e+06	6.47816e+06	1	274501	6	997	48	2
2633600	81	595100	Hoon Hay	6006	Spreydon-Heathcote Ward	60	Christchurch City	13	Canterbury Region	2.47773e+06	5.73829e+06	1	2633600	3	920	27	1
2896100	156	602900	Fernhill	7103	Cargill Ward	71	Dunedin City	14	Otago Region	2.31505e+06	5.47766e+06	1	2896100	7	1027	55	2
1717000	60	556400	Gonville West	3702	Urban Ward	37	Wanganui District	08	Manawatu-Wanganui Region	2.68245e+06	6.13824e+06	1	1717000	10	1334	27	3
1716201	105	555900	Mosston	3702	Urban Ward	37	Wanganui District	08	Manawatu-Wanganui Region	2.68146e+06	6.1388e+06	1	1716201	10	1579	47	3
1717200	90	556400	Gonville West	3702	Urban Ward	37	Wanganui District	08	Manawatu-Wanganui Region	2.68277e+06	6.1382e+06	1	1717200	10	1231	40	3
2372700	108	584301	Motueka West	5104	Motueka Ward	51	Tasman District	16	Tasman Region	2.50987e+06	6.00729e+06	1	2372700	7	1019	38	2
1979002	57	568702	Waiwhetu South	4602	Harbour Ward	46	Lower Hutt City	09	Wellington Region	2.671e+06	5.99592e+06	1	1979002	5	954	20	2
12902	51	500301	Kaitaia West	101	Northern Ward	1	Far North District	01	Northland Region	2.53429e+06	6.67786e+06	1	12902	8	1060	23	3
1978700	120	568702	Waiwhetu South	4602	Harbour Ward	46	Lower Hutt City	09	Wellington Region	2.67078e+06	5.99619e+06	1	1978700	7	1023	42	2
13205	102	500302	Kaitaia East	101	Northern Ward	1	Far North District	01	Northland Region	2.53458e+06	6.67794e+06	1	13205	10	1252	46	3
13300	276	500302	Kaitaia East	101	Northern Ward	1	Far North District	01	Northland Region	2.5346e+06	6.67742e+06	1	13300	9	1126	124	3
13203	273	500302	Kaitaia East	101	Northern Ward	1	Far North District	01	Northland Region	2.53496e+06	6.67731e+06	1	13203	10	1247	123	3
12903	114	500301	Kaitaia West	101	Northern Ward	1	Far North District	01	Northland Region	2.53432e+06	6.67724e+06	1	12903	8	1060	51	3
13400	144	500302	Kaitaia East	101	Northern Ward	1	Far North District	01	Northland Region	2.53451e+06	6.6772e+06	1	13400	8	1071	65	3
13204	54	500302	Kaitaia East	101	Northern Ward	1	Far North District	01	Northland Region	2.53472e+06	6.67718e+06	1	13204	10	1247	24	3
13100	240	500301	Kaitaia West	101	Northern Ward	1	Far North District	01	Northland Region	2.53424e+06	6.67685e+06	1	13100	10	1242	108	3
13600	48	500302	Kaitaia East	101	Northern Ward	1	Far North District	01	Northland Region	2.53463e+06	6.67689e+06	1	13600	9	1085	22	3
13500	15	500301	Kaitaia West	101	Northern Ward	1	Far North District	01	Northland Region	2.53447e+06	6.67684e+06	1	13500	9	1085	7	3
536400	114	517701	Sandringham North	703	Eden-Albert Ward	7	Auckland City	02	Auckland Region	2.66534e+06	6.47881e+06	1	536400	4	939	40	2
406600	162	515431	Surrey Crescent	701	Western Bays Ward	7	Auckland City	02	Auckland Region	2.66521e+06	6.48033e+06	1	406600	7	1015	57	2
668400	204	522302	Papatoetoe East	802	Papatoetoe Ward	8	Manukau City	02	Auckland Region	2.67668e+06	6.46832e+06	1	668400	9	1100	92	3
406501	78	515431	Surrey Crescent	701	Western Bays Ward	7	Auckland City	02	Auckland Region	2.66515e+06	6.48028e+06	1	406501	5	966	27	2
541400	156	517702	Sandringham West	703	Eden-Albert Ward	7	Auckland City	02	Auckland Region	2.66494e+06	6.47715e+06	1	541400	8	1039	70	3
409900	51	515420	Grey Lynn East	701	Western Bays Ward	7	Auckland City	02	Auckland Region	2.66605e+06	6.48047e+06	1	409900	4	941	18	2
1720000	153	556500	Springvale West	3702	Urban Ward	37	Wanganui District	08	Manawatu-Wanganui Region	2.68281e+06	6.13978e+06	1	1720000	6	993	54	2
2635802	120	595200	Hoon Hay South	6006	Spreydon-Heathcote Ward	60	Christchurch City	13	Canterbury Region	2.47838e+06	5.73735e+06	1	2635802	4	936	42	2
2898400	66	603000	High St-Stuart St	7103	Cargill Ward	71	Dunedin City	14	Otago Region	2.3152e+06	5.47798e+06	1	2898400	8	1059	30	3
2898300	90	603000	High St-Stuart St	7103	Cargill Ward	71	Dunedin City	14	Otago Region	2.31538e+06	5.47795e+06	1	2898300	9	1092	40	3
539500	36	517703	Sandringham East	703	Eden-Albert Ward	7	Auckland City	02	Auckland Region	2.66533e+06	6.47683e+06	1	539500	6	991	13	2
2898900	9	603000	High St-Stuart St	7103	Cargill Ward	71	Dunedin City	14	Otago Region	2.31567e+06	5.47861e+06	1	2898900	8	1032	4	3
1717800	81	556400	Gonville West	3702	Urban Ward	37	Wanganui District	08	Manawatu-Wanganui Region	2.68205e+06	6.13856e+06	1	1717800	10	1388	36	3
1718100	84	556400	Gonville West	3702	Urban Ward	37	Wanganui District	08	Manawatu-Wanganui Region	2.68228e+06	6.13851e+06	1	1718100	10	1302	38	3
2636500	162	595200	Hoon Hay South	6006	Spreydon-Heathcote Ward	60	Christchurch City	13	Canterbury Region	2.47876e+06	5.73673e+06	1	2636500	3	926	53	1
2635100	102	595200	Hoon Hay South	6006	Spreydon-Heathcote Ward	60	Christchurch City	13	Canterbury Region	2.47834e+06	5.73773e+06	1	2635100	4	950	36	2
2898600	141	603000	High St-Stuart St	7103	Cargill Ward	71	Dunedin City	14	Otago Region	2.31511e+06	5.47782e+06	1	2898600	8	1043	63	3
1717900	63	556400	Gonville West	3702	Urban Ward	37	Wanganui District	08	Manawatu-Wanganui Region	2.6821e+06	6.13845e+06	1	1717900	10	1302	28	3
406900	90	515420	Grey Lynn East	701	Western Bays Ward	7	Auckland City	02	Auckland Region	2.66556e+06	6.48046e+06	1	406900	5	969	31	2
407100	63	515420	Grey Lynn East	701	Western Bays Ward	7	Auckland City	02	Auckland Region	2.66556e+06	6.48028e+06	1	407100	6	979	22	2
407300	69	515420	Grey Lynn East	701	Western Bays Ward	7	Auckland City	02	Auckland Region	2.66574e+06	6.48038e+06	1	407300	5	969	24	2
538900	102	517703	Sandringham East	703	Eden-Albert Ward	7	Auckland City	02	Auckland Region	2.66513e+06	6.47701e+06	1	538900	6	981	36	2
2636000	72	595200	Hoon Hay South	6006	Spreydon-Heathcote Ward	60	Christchurch City	13	Canterbury Region	2.47848e+06	5.73706e+06	1	2636000	3	931	24	1
538700	141	517703	Sandringham East	703	Eden-Albert Ward	7	Auckland City	02	Auckland Region	2.66521e+06	6.47709e+06	1	538700	10	1149	63	3
2636800	228	594900	Barrington South	6006	Spreydon-Heathcote Ward	60	Christchurch City	13	Canterbury Region	2.47904e+06	5.73826e+06	1	2636800	3	928	75	1
2898100	69	603000	High St-Stuart St	7103	Cargill Ward	71	Dunedin City	14	Otago Region	2.31546e+06	5.47814e+06	1	2898100	9	1092	31	3
2897400	144	602900	Fernhill	7103	Cargill Ward	71	Dunedin City	14	Otago Region	2.31536e+06	5.47754e+06	1	2897400	6	996	50	2
539600	39	517703	Sandringham East	703	Eden-Albert Ward	7	Auckland City	02	Auckland Region	2.66537e+06	6.47682e+06	1	539600	6	991	14	2
539300	78	517703	Sandringham East	703	Eden-Albert Ward	7	Auckland City	02	Auckland Region	2.66513e+06	6.47669e+06	1	539300	10	1152	35	3
407000	75	515420	Grey Lynn East	701	Western Bays Ward	7	Auckland City	02	Auckland Region	2.66548e+06	6.48039e+06	1	407000	5	969	26	2
1718500	117	556100	Tawhero	3702	Urban Ward	37	Wanganui District	08	Manawatu-Wanganui Region	2.68168e+06	6.13876e+06	1	1718500	10	1178	53	3
2635900	129	595200	Hoon Hay South	6006	Spreydon-Heathcote Ward	60	Christchurch City	13	Canterbury Region	2.47854e+06	5.73742e+06	1	2635900	4	952	45	2
2635200	189	595200	Hoon Hay South	6006	Spreydon-Heathcote Ward	60	Christchurch City	13	Canterbury Region	2.47846e+06	5.73778e+06	1	2635200	4	946	66	2
2897600	3	602900	Fernhill	7103	Cargill Ward	71	Dunedin City	14	Otago Region	2.31558e+06	5.47749e+06	1	2897600	9	1108	1	3
2898200	78	603000	High St-Stuart St	7103	Cargill Ward	71	Dunedin City	14	Otago Region	2.31555e+06	5.47803e+06	1	2898200	9	1092	35	3
1717600	72	556400	Gonville West	3702	Urban Ward	37	Wanganui District	08	Manawatu-Wanganui Region	2.68182e+06	6.13857e+06	1	1717600	10	1388	32	3
539200	75	517703	Sandringham East	703	Eden-Albert Ward	7	Auckland City	02	Auckland Region	2.66507e+06	6.47676e+06	1	539200	2	903	25	1
2636400	99	595200	Hoon Hay South	6006	Spreydon-Heathcote Ward	60	Christchurch City	13	Canterbury Region	2.47881e+06	5.73689e+06	1	2636400	2	906	33	1
2636300	33	595200	Hoon Hay South	6006	Spreydon-Heathcote Ward	60	Christchurch City	13	Canterbury Region	2.47859e+06	5.73686e+06	1	2636300	2	906	11	1
407200	48	515420	Grey Lynn East	701	Western Bays Ward	7	Auckland City	02	Auckland Region	2.66565e+06	6.48032e+06	1	407200	5	969	17	2
2636700	141	594900	Barrington South	6006	Spreydon-Heathcote Ward	60	Christchurch City	13	Canterbury Region	2.4793e+06	5.73849e+06	1	2636700	8	1036	63	3
2898500	42	603000	High St-Stuart St	7103	Cargill Ward	71	Dunedin City	14	Otago Region	2.31527e+06	5.4779e+06	1	2898500	8	1059	19	3
539000	99	517703	Sandringham East	703	Eden-Albert Ward	7	Auckland City	02	Auckland Region	2.66497e+06	6.4769e+06	1	539000	6	981	35	2
681328	96	522722	Aberfeldy	806	Howick Ward	8	Manukau City	02	Auckland Region	2.68056e+06	6.47535e+06	1	681328	4	936	34	2
669601	120	522302	Papatoetoe East	802	Papatoetoe Ward	8	Manukau City	02	Auckland Region	2.6769e+06	6.468e+06	1	669601	8	1050	54	3
2635300	120	595200	Hoon Hay South	6006	Spreydon-Heathcote Ward	60	Christchurch City	13	Canterbury Region	2.47831e+06	5.73761e+06	1	2635300	3	932	40	1
407400	99	515420	Grey Lynn East	701	Western Bays Ward	7	Auckland City	02	Auckland Region	2.66583e+06	6.48042e+06	1	407400	5	954	35	2
2897700	138	603000	High St-Stuart St	7103	Cargill Ward	71	Dunedin City	14	Otago Region	2.31488e+06	5.47776e+06	1	2897700	5	968	48	2
539400	90	517703	Sandringham East	703	Eden-Albert Ward	7	Auckland City	02	Auckland Region	2.66526e+06	6.47684e+06	1	539400	10	1152	40	3
2636100	144	595200	Hoon Hay South	6006	Spreydon-Heathcote Ward	60	Christchurch City	13	Canterbury Region	2.47855e+06	5.73712e+06	1	2636100	4	947	50	2
2636200	156	595200	Hoon Hay South	6006	Spreydon-Heathcote Ward	60	Christchurch City	13	Canterbury Region	2.4787e+06	5.73711e+06	1	2636200	6	977	55	2
2635400	243	595200	Hoon Hay South	6006	Spreydon-Heathcote Ward	60	Christchurch City	13	Canterbury Region	2.47858e+06	5.73781e+06	1	2635400	3	930	80	1
2897500	132	602900	Fernhill	7103	Cargill Ward	71	Dunedin City	14	Otago Region	2.31556e+06	5.47765e+06	1	2897500	9	1108	59	3
2897300	48	602900	Fernhill	7103	Cargill Ward	71	Dunedin City	14	Otago Region	2.3154e+06	5.47768e+06	1	2897300	9	1108	22	3
2898700	69	603000	High St-Stuart St	7103	Cargill Ward	71	Dunedin City	14	Otago Region	2.31551e+06	5.47881e+06	1	2898700	5	964	24	2
1718700	78	556100	Tawhero	3702	Urban Ward	37	Wanganui District	08	Manawatu-Wanganui Region	2.68194e+06	6.13881e+06	1	1718700	10	1166	35	3
14300	96	500302	Kaitaia East	101	Northern Ward	1	Far North District	01	Northland Region	2.53556e+06	6.67629e+06	1	14300	7	1017	34	2
13700	102	500302	Kaitaia East	101	Northern Ward	1	Far North District	01	Northland Region	2.53477e+06	6.67698e+06	1	13700	10	1236	46	3
13900	96	500302	Kaitaia East	101	Northern Ward	1	Far North District	01	Northland Region	2.53494e+06	6.67683e+06	1	13900	9	1106	43	3
14100	21	500302	Kaitaia East	101	Northern Ward	1	Far North District	01	Northland Region	2.53505e+06	6.67667e+06	1	14100	9	1085	9	3
669300	159	522302	Papatoetoe East	802	Papatoetoe Ward	8	Manukau City	02	Auckland Region	2.67723e+06	6.46758e+06	1	669300	8	1059	72	3
14000	6	500302	Kaitaia East	101	Northern Ward	1	Far North District	01	Northland Region	2.53492e+06	6.67651e+06	1	14000	9	1106	3	3
539100	102	517703	Sandringham East	703	Eden-Albert Ward	7	Auckland City	02	Auckland Region	2.66503e+06	6.47681e+06	1	539100	2	903	34	1
14200	15	500302	Kaitaia East	101	Northern Ward	1	Far North District	01	Northland Region	2.53507e+06	6.67625e+06	1	14200	9	1085	7	3
14700	54	500301	Kaitaia West	101	Northern Ward	1	Far North District	01	Northland Region	2.5348e+06	6.676e+06	1	14700	9	1085	24	3
14400	267	500302	Kaitaia East	101	Northern Ward	1	Far North District	01	Northland Region	2.53594e+06	6.67609e+06	1	14400	8	1040	120	3
14600	3	500301	Kaitaia West	101	Northern Ward	1	Far North District	01	Northland Region	2.53493e+06	6.67618e+06	1	14600	9	1085	1	3
14500	9	500302	Kaitaia East	101	Northern Ward	1	Far North District	01	Northland Region	2.53557e+06	6.67616e+06	1	14500	7	1017	3	2
15200	69	500301	Kaitaia West	101	Northern Ward	1	Far North District	01	Northland Region	2.5343e+06	6.67573e+06	1	15200	9	1125	31	3
15100	102	500301	Kaitaia West	101	Northern Ward	1	Far North District	01	Northland Region	2.53519e+06	6.67591e+06	1	15100	9	1092	46	3
14800	18	500301	Kaitaia West	101	Northern Ward	1	Far North District	01	Northland Region	2.53465e+06	6.67589e+06	1	14800	9	1085	8	3
15000	66	500301	Kaitaia West	101	Northern Ward	1	Far North District	01	Northland Region	2.53486e+06	6.67578e+06	1	15000	9	1092	30	3
14900	171	500301	Kaitaia West	101	Northern Ward	1	Far North District	01	Northland Region	2.53474e+06	6.67559e+06	1	14900	7	1008	60	2
15300	198	500301	Kaitaia West	101	Northern Ward	1	Far North District	01	Northland Region	2.53456e+06	6.67543e+06	1	15300	9	1086	89	3
2635600	90	595200	Hoon Hay South	6006	Spreydon-Heathcote Ward	60	Christchurch City	13	Canterbury Region	2.47888e+06	5.73708e+06	1	2635600	3	931	30	1
2901000	3	603100	Stuart St-Frederick St	7103	Cargill Ward	71	Dunedin City	14	Otago Region	2.31627e+06	5.47864e+06	1	2901000	9	1128	1	3
2902300	45	603100	Stuart St-Frederick St	7103	Cargill Ward	71	Dunedin City	14	Otago Region	2.31621e+06	5.47913e+06	1	2902300	9	1109	20	3
2378101	189	584303	Motueka East	5104	Motueka Ward	51	Tasman District	16	Tasman Region	2.51108e+06	6.01019e+06	1	2378101	7	1000	66	2
2899100	69	603000	High St-Stuart St	7103	Cargill Ward	71	Dunedin City	14	Otago Region	2.31583e+06	5.47856e+06	1	2899100	5	964	24	2
2900000	66	603000	High St-Stuart St	7103	Cargill Ward	71	Dunedin City	14	Otago Region	2.31596e+06	5.47851e+06	1	2900000	7	1026	23	2
2636900	252	594900	Barrington South	6006	Spreydon-Heathcote Ward	60	Christchurch City	13	Canterbury Region	2.47933e+06	5.73832e+06	1	2636900	5	955	88	2
410000	168	515420	Grey Lynn East	701	Western Bays Ward	7	Auckland City	02	Auckland Region	2.66609e+06	6.48059e+06	1	410000	5	971	59	2
2899700	48	603000	High St-Stuart St	7103	Cargill Ward	71	Dunedin City	14	Otago Region	2.3162e+06	5.47838e+06	1	2899700	7	1026	17	2
2899300	102	603000	High St-Stuart St	7103	Cargill Ward	71	Dunedin City	14	Otago Region	2.31592e+06	5.47839e+06	1	2899300	7	1009	36	2
2900100	3	603000	High St-Stuart St	7103	Cargill Ward	71	Dunedin City	14	Otago Region	2.31542e+06	5.47876e+06	1	2900100	6	990	1	2
1721000	75	556600	Springvale East	3702	Urban Ward	37	Wanganui District	08	Manawatu-Wanganui Region	2.68356e+06	6.14025e+06	1	1721000	6	980	26	2
409700	96	515420	Grey Lynn East	701	Western Bays Ward	7	Auckland City	02	Auckland Region	2.66591e+06	6.48048e+06	1	409700	4	941	34	2
541100	237	517702	Sandringham West	703	Eden-Albert Ward	7	Auckland City	02	Auckland Region	2.66466e+06	6.47734e+06	1	541100	6	987	83	2
1497600	105	548000	Mayfair	3005	Hastings Ward	30	Hastings District	06	Hawke's Bay Region	2.84107e+06	6.16682e+06	1	1497600	6	996	37	2
2900600	120	603000	High St-Stuart St	7103	Cargill Ward	71	Dunedin City	14	Otago Region	2.31541e+06	5.47838e+06	1	2900600	7	1011	42	2
2899800	42	603000	High St-Stuart St	7103	Cargill Ward	71	Dunedin City	14	Otago Region	2.31629e+06	5.47839e+06	1	2899800	7	1022	15	2
2900400	123	603000	High St-Stuart St	7103	Cargill Ward	71	Dunedin City	14	Otago Region	2.31517e+06	5.47834e+06	1	2900400	6	995	43	2
1719700	105	556500	Springvale West	3702	Urban Ward	37	Wanganui District	08	Manawatu-Wanganui Region	2.68296e+06	6.13999e+06	1	1719700	5	955	37	2
671400	132	522400	Puhinui	802	Papatoetoe Ward	8	Manukau City	02	Auckland Region	2.67699e+06	6.46734e+06	1	671400	4	945	46	2
539900	141	517703	Sandringham East	703	Eden-Albert Ward	7	Auckland City	02	Auckland Region	2.66528e+06	6.47652e+06	1	539900	6	998	49	2
2637200	207	594900	Barrington South	6006	Spreydon-Heathcote Ward	60	Christchurch City	13	Canterbury Region	2.47926e+06	5.73814e+06	1	2637200	3	933	68	1
541200	198	517702	Sandringham West	703	Eden-Albert Ward	7	Auckland City	02	Auckland Region	2.66479e+06	6.47728e+06	1	541200	4	952	69	2
2638100	162	594900	Barrington South	6006	Spreydon-Heathcote Ward	60	Christchurch City	13	Canterbury Region	2.47895e+06	5.73726e+06	1	2638100	2	918	53	1
2900200	69	603000	High St-Stuart St	7103	Cargill Ward	71	Dunedin City	14	Otago Region	2.31522e+06	5.47853e+06	1	2900200	6	990	24	2
1719900	63	556500	Springvale West	3702	Urban Ward	37	Wanganui District	08	Manawatu-Wanganui Region	2.68309e+06	6.13978e+06	1	1719900	5	955	22	2
671500	201	522400	Puhinui	802	Papatoetoe Ward	8	Manukau City	02	Auckland Region	2.67702e+06	6.46711e+06	1	671500	7	1003	70	2
2899900	27	603000	High St-Stuart St	7103	Cargill Ward	71	Dunedin City	14	Otago Region	2.31609e+06	5.47847e+06	1	2899900	7	1022	9	2
2900500	90	603000	High St-Stuart St	7103	Cargill Ward	71	Dunedin City	14	Otago Region	2.31545e+06	5.47848e+06	1	2900500	7	1010	31	2
2899200	90	603000	High St-Stuart St	7103	Cargill Ward	71	Dunedin City	14	Otago Region	2.31586e+06	5.47828e+06	1	2899200	7	1026	31	2
2900300	90	603000	High St-Stuart St	7103	Cargill Ward	71	Dunedin City	14	Otago Region	2.31524e+06	5.47844e+06	1	2900300	6	990	31	2
671700	231	524601	Manukau Central	802	Papatoetoe Ward	8	Manukau City	02	Auckland Region	2.67713e+06	6.46701e+06	1	671700	9	1084	104	3
671100	93	522400	Puhinui	802	Papatoetoe Ward	8	Manukau City	02	Auckland Region	2.67719e+06	6.4674e+06	1	671100	8	1065	42	3
2121600	108	572900	Thorndon-Tinakori Road	4703	Lambton Ward	47	Wellington City	09	Wellington Region	2.6584e+06	5.99063e+06	1	2121600	5	956	38	2
2637000	120	594900	Barrington South	6006	Spreydon-Heathcote Ward	60	Christchurch City	13	Canterbury Region	2.47901e+06	5.73805e+06	1	2637000	8	1070	54	3
2637100	36	594900	Barrington South	6006	Spreydon-Heathcote Ward	60	Christchurch City	13	Canterbury Region	2.47884e+06	5.73804e+06	1	2637100	8	1070	16	3
539700	60	517703	Sandringham East	703	Eden-Albert Ward	7	Auckland City	02	Auckland Region	2.66514e+06	6.47655e+06	1	539700	6	991	21	2
2899400	24	603000	High St-Stuart St	7103	Cargill Ward	71	Dunedin City	14	Otago Region	2.31565e+06	5.47824e+06	1	2899400	8	1032	11	3
2900700	144	603000	High St-Stuart St	7103	Cargill Ward	71	Dunedin City	14	Otago Region	2.31537e+06	5.47827e+06	1	2900700	8	1032	65	3
2899600	39	603000	High St-Stuart St	7103	Cargill Ward	71	Dunedin City	14	Otago Region	2.31601e+06	5.47827e+06	1	2899600	7	1022	14	2
2638500	294	590300	Middleton	6006	Spreydon-Heathcote Ward	60	Christchurch City	13	Canterbury Region	2.47816e+06	5.7401e+06	1	2638500	7	1003	103	2
1719800	117	556500	Springvale West	3702	Urban Ward	37	Wanganui District	08	Manawatu-Wanganui Region	2.68287e+06	6.13994e+06	1	1719800	6	978	41	2
1720803	24	556600	Springvale East	3702	Urban Ward	37	Wanganui District	08	Manawatu-Wanganui Region	2.68352e+06	6.14081e+06	1	1720803	1	895	8	1
539800	126	517703	Sandringham East	703	Eden-Albert Ward	7	Auckland City	02	Auckland Region	2.66522e+06	6.47654e+06	1	539800	8	1030	57	3
671200	81	522400	Puhinui	802	Papatoetoe Ward	8	Manukau City	02	Auckland Region	2.67734e+06	6.46726e+06	1	671200	8	1065	36	3
15700	75	500301	Kaitaia West	101	Northern Ward	1	Far North District	01	Northland Region	2.53456e+06	6.67669e+06	1	15700	10	1161	34	3
15600	171	500301	Kaitaia West	101	Northern Ward	1	Far North District	01	Northland Region	2.53421e+06	6.67661e+06	1	15600	10	1315	77	3
16000	51	500301	Kaitaia West	101	Northern Ward	1	Far North District	01	Northland Region	2.53454e+06	6.67652e+06	1	16000	10	1161	23	3
16100	6	500301	Kaitaia West	101	Northern Ward	1	Far North District	01	Northland Region	2.53471e+06	6.67653e+06	1	16100	9	1106	3	3
15900	84	500301	Kaitaia West	101	Northern Ward	1	Far North District	01	Northland Region	2.53427e+06	6.67648e+06	1	15900	10	1230	38	3
16500	3	500301	Kaitaia West	101	Northern Ward	1	Far North District	01	Northland Region	2.53484e+06	6.67635e+06	1	16500	9	1106	1	3
16300	132	500301	Kaitaia West	101	Northern Ward	1	Far North District	01	Northland Region	2.5345e+06	6.67628e+06	1	16300	8	1051	59	3
16200	90	500301	Kaitaia West	101	Northern Ward	1	Far North District	01	Northland Region	2.53431e+06	6.67624e+06	1	16200	9	1135	40	3
15800	117	500301	Kaitaia West	101	Northern Ward	1	Far North District	01	Northland Region	2.53408e+06	6.67632e+06	1	15800	10	1230	53	3
16400	15	500301	Kaitaia West	101	Northern Ward	1	Far North District	01	Northland Region	2.53477e+06	6.67629e+06	1	16400	8	1051	7	3
16600	90	500301	Kaitaia West	101	Northern Ward	1	Far North District	01	Northland Region	2.5344e+06	6.67613e+06	1	16600	9	1135	40	3
16700	111	500301	Kaitaia West	101	Northern Ward	1	Far North District	01	Northland Region	2.53446e+06	6.67596e+06	1	16700	10	1333	50	3
16800	51	500301	Kaitaia West	101	Northern Ward	1	Far North District	01	Northland Region	2.53455e+06	6.67592e+06	1	16800	10	1333	23	3
15401	18	500301	Kaitaia West	101	Northern Ward	1	Far North District	01	Northland Region	2.53559e+06	6.6756e+06	1	15401	9	1125	8	3
15402	276	500301	Kaitaia West	101	Northern Ward	1	Far North District	01	Northland Region	2.53549e+06	6.67555e+06	1	15402	9	1125	124	3
409800	66	515420	Grey Lynn East	701	Western Bays Ward	7	Auckland City	02	Auckland Region	2.66597e+06	6.48058e+06	1	409800	4	951	23	2
2899500	24	603000	High St-Stuart St	7103	Cargill Ward	71	Dunedin City	14	Otago Region	2.31579e+06	5.47814e+06	1	2899500	7	1022	8	2
543900	141	518101	Mt Eden North	703	Eden-Albert Ward	7	Auckland City	02	Auckland Region	2.66708e+06	6.4796e+06	1	543900	2	905	47	1
2903600	15	603100	Stuart St-Frederick St	7103	Cargill Ward	71	Dunedin City	14	Otago Region	2.31577e+06	5.47872e+06	1	2903600	8	1032	7	3
2509901	210	588101	Redwood North	6001	Shirley-Papanui Ward	60	Christchurch City	13	Canterbury Region	2.47915e+06	5.74826e+06	1	2509901	4	950	74	2
2903700	27	603100	Stuart St-Frederick St	7103	Cargill Ward	71	Dunedin City	14	Otago Region	2.31629e+06	5.47913e+06	1	2903700	9	1128	12	3
1723600	108	556300	Gonville East	3702	Urban Ward	37	Wanganui District	08	Manawatu-Wanganui Region	2.68337e+06	6.13912e+06	1	1723600	10	1218	49	3
1723200	84	556300	Gonville East	3702	Urban Ward	37	Wanganui District	08	Manawatu-Wanganui Region	2.68309e+06	6.13925e+06	1	1723200	9	1130	38	3
543800	186	518101	Mt Eden North	703	Eden-Albert Ward	7	Auckland City	02	Auckland Region	2.66728e+06	6.47967e+06	1	543800	5	974	65	2
412402	12	514200	Newton	704	Hobson Ward	7	Auckland City	02	Auckland Region	2.66728e+06	6.48061e+06	1	412402	6	984	4	2
544500	60	518101	Mt Eden North	703	Eden-Albert Ward	7	Auckland City	02	Auckland Region	2.66677e+06	6.47978e+06	1	544500	6	979	21	2
544302	24	518101	Mt Eden North	703	Eden-Albert Ward	7	Auckland City	02	Auckland Region	2.66677e+06	6.47985e+06	1	544302	4	948	8	2
412500	72	514200	Newton	704	Hobson Ward	7	Auckland City	02	Auckland Region	2.66729e+06	6.48069e+06	1	412500	6	984	25	2
410700	120	515420	Grey Lynn East	701	Western Bays Ward	7	Auckland City	02	Auckland Region	2.66618e+06	6.48065e+06	1	410700	1	895	40	1
1592100	6	551800	New Plymouth Central	3301	New Plymouth City Ward	33	New Plymouth District	07	Taranaki Region	2.60289e+06	6.2378e+06	1	1592100	6	999	2	2
2638800	198	594800	Barrington North	6006	Spreydon-Heathcote Ward	60	Christchurch City	13	Canterbury Region	2.47765e+06	5.7394e+06	1	2638800	6	998	69	2
411700	27	514200	Newton	701	Western Bays Ward	7	Auckland City	02	Auckland Region	2.66676e+06	6.48091e+06	1	411700	6	990	9	2
2056604	36	571500	Papakowhai	4403	Eastern Ward	44	Porirua City	09	Wellington Region	2.66502e+06	6.00605e+06	1	2056604	6	980	13	2
2901600	45	603100	Stuart St-Frederick St	7103	Cargill Ward	71	Dunedin City	14	Otago Region	2.31652e+06	5.47859e+06	1	2901600	9	1128	20	3
541500	159	517702	Sandringham West	703	Eden-Albert Ward	7	Auckland City	02	Auckland Region	2.66485e+06	6.477e+06	1	541500	4	947	56	2
2508200	27	588102	Redwood South	6001	Shirley-Papanui Ward	60	Christchurch City	13	Canterbury Region	2.479e+06	5.74701e+06	1	2508200	9	1126	12	3
2508301	162	588102	Redwood South	6001	Shirley-Papanui Ward	60	Christchurch City	13	Canterbury Region	2.47972e+06	5.74695e+06	1	2508301	2	900	53	1
2508600	177	588102	Redwood South	6001	Shirley-Papanui Ward	60	Christchurch City	13	Canterbury Region	2.47949e+06	5.74644e+06	1	2508600	6	985	62	2
2638900	165	594800	Barrington North	6006	Spreydon-Heathcote Ward	60	Christchurch City	13	Canterbury Region	2.4778e+06	5.73937e+06	1	2638900	8	1053	74	3
2509001	180	588102	Redwood South	6001	Shirley-Papanui Ward	60	Christchurch City	13	Canterbury Region	2.47924e+06	5.74754e+06	1	2509001	6	995	63	2
2900800	63	603000	High St-Stuart St	7103	Cargill Ward	71	Dunedin City	14	Otago Region	2.31562e+06	5.47841e+06	1	2900800	7	1010	22	2
1722800	102	556300	Gonville East	3702	Urban Ward	37	Wanganui District	08	Manawatu-Wanganui Region	2.6831e+06	6.13955e+06	1	1722800	4	946	36	2
411900	57	514200	Newton	701	Western Bays Ward	7	Auckland City	02	Auckland Region	2.66686e+06	6.481e+06	1	411900	6	990	20	2
411500	45	515420	Grey Lynn East	701	Western Bays Ward	7	Auckland City	02	Auckland Region	2.66648e+06	6.48091e+06	1	411500	3	922	15	1
2901100	3	603100	Stuart St-Frederick St	7103	Cargill Ward	71	Dunedin City	14	Otago Region	2.31634e+06	5.47884e+06	1	2901100	9	1128	1	3
2901400	6	603100	Stuart St-Frederick St	7103	Cargill Ward	71	Dunedin City	14	Otago Region	2.31649e+06	5.47888e+06	1	2901400	9	1128	3	3
542700	519	518101	Mt Eden North	703	Eden-Albert Ward	7	Auckland City	02	Auckland Region	2.66768e+06	6.48e+06	1	542700	7	1020	182	2
2122000	18	572900	Thorndon-Tinakori Road	4703	Lambton Ward	47	Wellington City	09	Wellington Region	2.65847e+06	5.99037e+06	1	2122000	4	947	6	2
2507507	18	588102	Redwood South	6001	Shirley-Papanui Ward	60	Christchurch City	13	Canterbury Region	2.4798e+06	5.74663e+06	1	2507507	4	946	6	2
2508500	234	588102	Redwood South	6001	Shirley-Papanui Ward	60	Christchurch City	13	Canterbury Region	2.47932e+06	5.7467e+06	1	2508500	3	924	77	1
2508302	276	588102	Redwood South	6001	Shirley-Papanui Ward	60	Christchurch City	13	Canterbury Region	2.47961e+06	5.74668e+06	1	2508302	3	927	91	1
2507608	90	588102	Redwood South	6001	Shirley-Papanui Ward	60	Christchurch City	13	Canterbury Region	2.47994e+06	5.7466e+06	1	2507608	2	914	30	1
2639000	186	594800	Barrington North	6006	Spreydon-Heathcote Ward	60	Christchurch City	13	Canterbury Region	2.47745e+06	5.73922e+06	1	2639000	9	1105	84	3
2508000	189	588102	Redwood South	6001	Shirley-Papanui Ward	60	Christchurch City	13	Canterbury Region	2.4792e+06	5.74728e+06	1	2508000	9	1073	85	3
2901800	138	603100	Stuart St-Frederick St	7103	Cargill Ward	71	Dunedin City	14	Otago Region	2.31668e+06	5.47877e+06	1	2901800	10	1159	62	3
1722100	93	556700	Wanganui Collegiate	3702	Urban Ward	37	Wanganui District	08	Manawatu-Wanganui Region	2.68363e+06	6.13923e+06	1	1722100	8	1056	42	3
542502	270	518101	Mt Eden North	703	Eden-Albert Ward	7	Auckland City	02	Auckland Region	2.66717e+06	6.47992e+06	1	542502	5	971	94	2
542600	135	518101	Mt Eden North	703	Eden-Albert Ward	7	Auckland City	02	Auckland Region	2.66753e+06	6.48003e+06	1	542600	4	950	47	2
542800	285	518101	Mt Eden North	703	Eden-Albert Ward	7	Auckland City	02	Auckland Region	2.6674e+06	6.47985e+06	1	542800	6	981	100	2
411600	12	515420	Grey Lynn East	701	Western Bays Ward	7	Auckland City	02	Auckland Region	2.66657e+06	6.48096e+06	1	411600	3	922	4	1
2508103	90	588102	Redwood South	6001	Shirley-Papanui Ward	60	Christchurch City	13	Canterbury Region	2.47917e+06	5.74718e+06	1	2508103	9	1126	40	3
2902400	246	603100	Stuart St-Frederick St	7103	Cargill Ward	71	Dunedin City	14	Otago Region	2.31598e+06	5.47903e+06	1	2902400	9	1092	111	3
2901200	51	603100	Stuart St-Frederick St	7103	Cargill Ward	71	Dunedin City	14	Otago Region	2.31645e+06	5.47907e+06	1	2901200	9	1128	23	3
2901300	546	603100	Stuart St-Frederick St	7103	Cargill Ward	71	Dunedin City	14	Otago Region	2.31656e+06	5.47905e+06	1	2901300	9	1128	246	3
1722200	66	556700	Wanganui Collegiate	3702	Urban Ward	37	Wanganui District	08	Manawatu-Wanganui Region	2.68372e+06	6.13908e+06	1	1722200	9	1099	30	3
1722700	111	556700	Wanganui Collegiate	3702	Urban Ward	37	Wanganui District	08	Manawatu-Wanganui Region	2.68398e+06	6.13901e+06	1	1722700	9	1099	50	3
1722000	15	556700	Wanganui Collegiate	3702	Urban Ward	37	Wanganui District	08	Manawatu-Wanganui Region	2.68372e+06	6.13976e+06	1	1722000	8	1056	7	3
543100	96	518101	Mt Eden North	703	Eden-Albert Ward	7	Auckland City	02	Auckland Region	2.6674e+06	6.47959e+06	1	543100	3	934	32	1
2376600	141	584303	Motueka East	5104	Motueka Ward	51	Tasman District	16	Tasman Region	2.51104e+06	6.01087e+06	1	2376600	10	1232	63	3
542400	195	517702	Sandringham West	703	Eden-Albert Ward	7	Auckland City	02	Auckland Region	2.66456e+06	6.47713e+06	1	542400	6	995	68	2
2638701	210	594800	Barrington North	6006	Spreydon-Heathcote Ward	60	Christchurch City	13	Canterbury Region	2.47794e+06	5.73962e+06	1	2638701	7	1010	74	2
2902100	141	603100	Stuart St-Frederick St	7103	Cargill Ward	71	Dunedin City	14	Otago Region	2.31669e+06	5.479e+06	1	2902100	9	1089	63	3
2902200	126	603100	Stuart St-Frederick St	7103	Cargill Ward	71	Dunedin City	14	Otago Region	2.31663e+06	5.47902e+06	1	2902200	9	1102	57	3
2902000	78	603100	Stuart St-Frederick St	7103	Cargill Ward	71	Dunedin City	14	Otago Region	2.31677e+06	5.479e+06	1	2902000	9	1109	35	3
411800	87	514200	Newton	701	Western Bays Ward	7	Auckland City	02	Auckland Region	2.6668e+06	6.48082e+06	1	411800	7	1007	30	2
1591700	18	551800	New Plymouth Central	3301	New Plymouth City Ward	33	New Plymouth District	07	Taranaki Region	2.6027e+06	6.23807e+06	1	1591700	6	999	6	2
2507609	132	588102	Redwood South	6001	Shirley-Papanui Ward	60	Christchurch City	13	Canterbury Region	2.47991e+06	5.74697e+06	1	2507609	2	914	44	1
2507506	39	588102	Redwood South	6001	Shirley-Papanui Ward	60	Christchurch City	13	Canterbury Region	2.47982e+06	5.74693e+06	1	2507506	4	946	14	2
2509002	60	588102	Redwood South	6001	Shirley-Papanui Ward	60	Christchurch City	13	Canterbury Region	2.47934e+06	5.74748e+06	1	2509002	1	886	20	1
542501	9	518101	Mt Eden North	704	Hobson Ward	7	Auckland City	02	Auckland Region	2.66741e+06	6.48011e+06	1	542501	5	971	3	2
2377800	81	584303	Motueka East	5104	Motueka Ward	51	Tasman District	16	Tasman Region	2.511e+06	6.01055e+06	1	2377800	10	1146	36	3
412100	36	514200	Newton	704	Hobson Ward	7	Auckland City	02	Auckland Region	2.66719e+06	6.48111e+06	1	412100	6	990	13	2
542900	300	518101	Mt Eden North	703	Eden-Albert Ward	7	Auckland City	02	Auckland Region	2.66754e+06	6.47971e+06	1	542900	7	1020	105	2
412000	72	514200	Newton	704	Hobson Ward	7	Auckland City	02	Auckland Region	2.6671e+06	6.48108e+06	1	412000	7	1007	25	2
2508400	102	588102	Redwood South	6001	Shirley-Papanui Ward	60	Christchurch City	13	Canterbury Region	2.47905e+06	5.74675e+06	1	2508400	5	958	36	2
2638600	186	594800	Barrington North	6006	Spreydon-Heathcote Ward	60	Christchurch City	13	Canterbury Region	2.47821e+06	5.73977e+06	1	2638600	5	963	65	2
2638702	111	594800	Barrington North	6006	Spreydon-Heathcote Ward	60	Christchurch City	13	Canterbury Region	2.47806e+06	5.73959e+06	1	2638702	6	994	39	2
2509202	114	588102	Redwood South	6001	Shirley-Papanui Ward	60	Christchurch City	13	Canterbury Region	2.47921e+06	5.74739e+06	1	2509202	4	936	40	2
2509201	75	588102	Redwood South	6001	Shirley-Papanui Ward	60	Christchurch City	13	Canterbury Region	2.47935e+06	5.74741e+06	1	2509201	5	968	26	2
2900900	75	603000	High St-Stuart St	7103	Cargill Ward	71	Dunedin City	14	Otago Region	2.3156e+06	5.4783e+06	1	2900900	7	1010	26	2
1721400	60	556700	Wanganui Collegiate	3702	Urban Ward	37	Wanganui District	08	Manawatu-Wanganui Region	2.68388e+06	6.13988e+06	1	1721400	2	902	20	1
1721900	21	556700	Wanganui Collegiate	3702	Urban Ward	37	Wanganui District	08	Manawatu-Wanganui Region	2.68357e+06	6.14002e+06	1	1721900	8	1056	9	3
1721200	135	556700	Wanganui Collegiate	3702	Urban Ward	37	Wanganui District	08	Manawatu-Wanganui Region	2.68373e+06	6.14005e+06	1	1721200	9	1091	61	3
2121900	69	572900	Thorndon-Tinakori Road	4703	Lambton Ward	47	Wellington City	09	Wellington Region	2.6584e+06	5.99032e+06	1	2121900	6	985	24	2
2508701	87	588102	Redwood South	6001	Shirley-Papanui Ward	60	Christchurch City	13	Canterbury Region	2.47928e+06	5.74627e+06	1	2508701	6	985	30	2
2904900	165	604020	Roslyn South	7104	Hills Ward	71	Dunedin City	14	Otago Region	2.31462e+06	5.47867e+06	1	2904900	3	928	54	1
2642300	198	594800	Barrington North	6006	Spreydon-Heathcote Ward	60	Christchurch City	13	Canterbury Region	2.47838e+06	5.74001e+06	1	2642300	6	980	69	2
2905202	30	604020	Roslyn South	7104	Hills Ward	71	Dunedin City	14	Otago Region	2.3152e+06	5.47918e+06	1	2905202	3	929	10	1
2905400	141	604020	Roslyn South	7104	Hills Ward	71	Dunedin City	14	Otago Region	2.31492e+06	5.47913e+06	1	2905400	4	943	49	2
2380000	135	584301	Motueka West	5104	Motueka Ward	51	Tasman District	16	Tasman Region	2.51072e+06	6.00875e+06	1	2380000	7	1024	47	2
2642200	63	594800	Barrington North	6006	Spreydon-Heathcote Ward	60	Christchurch City	13	Canterbury Region	2.47877e+06	5.73823e+06	1	2642200	4	948	22	2
2118700	30	572900	Thorndon-Tinakori Road	4703	Lambton Ward	47	Wellington City	09	Wellington Region	2.65911e+06	5.99108e+06	1	2118700	3	931	10	1
1594100	6	551800	New Plymouth Central	3301	New Plymouth City Ward	33	New Plymouth District	07	Taranaki Region	2.60395e+06	6.2383e+06	1	1594100	7	1013	2	2
2641701	165	594800	Barrington North	6006	Spreydon-Heathcote Ward	60	Christchurch City	13	Canterbury Region	2.4787e+06	5.73842e+06	1	2641701	9	1114	74	3
2641900	165	594800	Barrington North	6006	Spreydon-Heathcote Ward	60	Christchurch City	13	Canterbury Region	2.47888e+06	5.73851e+06	1	2641900	6	977	58	2
2118400	39	572900	Thorndon-Tinakori Road	4703	Lambton Ward	47	Wellington City	09	Wellington Region	2.65934e+06	5.99118e+06	1	2118400	3	922	13	1
2511501	120	588300	Casebrook	6001	Shirley-Papanui Ward	60	Christchurch City	13	Canterbury Region	2.47743e+06	5.74714e+06	1	2511501	3	931	40	1
1725100	162	556200	Gonville South	3702	Urban Ward	37	Wanganui District	08	Manawatu-Wanganui Region	2.68308e+06	6.1378e+06	1	1725100	9	1087	73	3
2903200	21	603100	Stuart St-Frederick St	7103	Cargill Ward	71	Dunedin City	14	Otago Region	2.31615e+06	5.47859e+06	1	2903200	8	1032	9	3
1724100	90	556200	Gonville South	3702	Urban Ward	37	Wanganui District	08	Manawatu-Wanganui Region	2.68329e+06	6.13854e+06	1	1724100	9	1073	40	3
1724000	117	556200	Gonville South	3702	Urban Ward	37	Wanganui District	08	Manawatu-Wanganui Region	2.68304e+06	6.13852e+06	1	1724000	9	1073	53	3
412200	261	514200	Newton	704	Hobson Ward	7	Auckland City	02	Auckland Region	2.66736e+06	6.48107e+06	1	412200	6	995	91	2
1724200	66	556200	Gonville South	3702	Urban Ward	37	Wanganui District	08	Manawatu-Wanganui Region	2.68322e+06	6.13841e+06	1	1724200	8	1030	30	3
2902900	24	603100	Stuart St-Frederick St	7103	Cargill Ward	71	Dunedin City	14	Otago Region	2.31624e+06	5.47892e+06	1	2902900	9	1128	11	3
2902500	225	603100	Stuart St-Frederick St	7103	Cargill Ward	71	Dunedin City	14	Otago Region	2.31571e+06	5.4789e+06	1	2902500	8	1039	101	3
1723700	102	556300	Gonville East	3702	Urban Ward	37	Wanganui District	08	Manawatu-Wanganui Region	2.68365e+06	6.139e+06	1	1723700	8	1046	46	3
544600	126	518101	Mt Eden North	703	Eden-Albert Ward	7	Auckland City	02	Auckland Region	2.66697e+06	6.47978e+06	1	544600	6	982	44	2
412302	162	514200	Newton	704	Hobson Ward	7	Auckland City	02	Auckland Region	2.6674e+06	6.48065e+06	1	412302	7	1005	57	2
413400	78	514000	Freemans Bay	701	Western Bays Ward	7	Auckland City	02	Auckland Region	2.66687e+06	6.48136e+06	1	413400	4	951	27	2
2378201	144	584303	Motueka East	5104	Motueka Ward	51	Tasman District	16	Tasman Region	2.51095e+06	6.00988e+06	1	2378201	8	1039	65	3
2379300	210	584301	Motueka West	5104	Motueka Ward	51	Tasman District	16	Tasman Region	2.51083e+06	6.00975e+06	1	2379300	9	1085	94	3
544000	162	518101	Mt Eden North	703	Eden-Albert Ward	7	Auckland City	02	Auckland Region	2.66702e+06	6.47951e+06	1	544000	5	970	57	2
1592400	36	551800	New Plymouth Central	3301	New Plymouth City Ward	33	New Plymouth District	07	Taranaki Region	2.60296e+06	6.23804e+06	1	1592400	6	999	13	2
544400	39	518101	Mt Eden North	703	Eden-Albert Ward	7	Auckland City	02	Auckland Region	2.66693e+06	6.47986e+06	1	544400	6	979	14	2
2902700	72	603100	Stuart St-Frederick St	7103	Cargill Ward	71	Dunedin City	14	Otago Region	2.31598e+06	5.47892e+06	1	2902700	9	1089	32	3
2509304	54	588101	Redwood North	6001	Shirley-Papanui Ward	60	Christchurch City	13	Canterbury Region	2.47916e+06	5.74787e+06	1	2509304	7	1003	19	2
1722900	81	556300	Gonville East	3702	Urban Ward	37	Wanganui District	08	Manawatu-Wanganui Region	2.68294e+06	6.13942e+06	1	1722900	9	1075	36	3
1723000	114	556300	Gonville East	3702	Urban Ward	37	Wanganui District	08	Manawatu-Wanganui Region	2.68317e+06	6.13939e+06	1	1723000	7	1005	40	2
543200	150	518101	Mt Eden North	703	Eden-Albert Ward	7	Auckland City	02	Auckland Region	2.66738e+06	6.47943e+06	1	543200	8	1044	68	3
1591900	15	551800	New Plymouth Central	3301	New Plymouth City Ward	33	New Plymouth District	07	Taranaki Region	2.60281e+06	6.23797e+06	1	1591900	6	999	5	2
1593000	60	551800	New Plymouth Central	3301	New Plymouth City Ward	33	New Plymouth District	07	Taranaki Region	2.60353e+06	6.23848e+06	1	1593000	6	981	21	2
2641300	180	594800	Barrington North	6006	Spreydon-Heathcote Ward	60	Christchurch City	13	Canterbury Region	2.47903e+06	5.73892e+06	1	2641300	8	1036	81	3
2510400	138	588300	Casebrook	6001	Shirley-Papanui Ward	60	Christchurch City	13	Canterbury Region	2.47775e+06	5.74661e+06	1	2510400	9	1129	62	3
413500	30	514000	Freemans Bay	701	Western Bays Ward	7	Auckland City	02	Auckland Region	2.66661e+06	6.48116e+06	1	413500	2	914	10	1
2903100	15	603100	Stuart St-Frederick St	7103	Cargill Ward	71	Dunedin City	14	Otago Region	2.3161e+06	5.4788e+06	1	2903100	8	1032	7	3
2378400	228	584303	Motueka East	5104	Motueka Ward	51	Tasman District	16	Tasman Region	2.51118e+06	6.00946e+06	1	2378400	6	992	80	2
412301	153	514200	Newton	704	Hobson Ward	7	Auckland City	02	Auckland Region	2.66744e+06	6.48102e+06	1	412301	7	1016	54	2
2641702	39	594800	Barrington North	6006	Spreydon-Heathcote Ward	60	Christchurch City	13	Canterbury Region	2.47867e+06	5.73833e+06	1	2641702	9	1114	18	3
1593300	3	551800	New Plymouth Central	3301	New Plymouth City Ward	33	New Plymouth District	07	Taranaki Region	2.60367e+06	6.23842e+06	1	1593300	6	981	1	2
2641600	105	594800	Barrington North	6006	Spreydon-Heathcote Ward	60	Christchurch City	13	Canterbury Region	2.47877e+06	5.7386e+06	1	2641600	10	1142	47	3
1240200	174	540520	Glenholme West	2403	East Ward	24	Rotorua District	04	Bay of Plenty Region	2.79415e+06	6.33406e+06	1	1240200	10	1148	78	3
413100	69	514000	Freemans Bay	701	Western Bays Ward	7	Auckland City	02	Auckland Region	2.66688e+06	6.48165e+06	1	413100	9	1122	31	3
2117100	45	572900	Thorndon-Tinakori Road	4703	Lambton Ward	47	Wellington City	09	Wellington Region	2.65941e+06	5.99202e+06	1	2117100	3	927	15	1
2510700	117	588300	Casebrook	6001	Shirley-Papanui Ward	60	Christchurch City	13	Canterbury Region	2.47757e+06	5.7466e+06	1	2510700	10	1249	53	3
2509600	156	588101	Redwood North	6001	Shirley-Papanui Ward	60	Christchurch City	13	Canterbury Region	2.47926e+06	5.7477e+06	1	2509600	5	960	55	2
2509500	57	588101	Redwood North	6001	Shirley-Papanui Ward	60	Christchurch City	13	Canterbury Region	2.47907e+06	5.74772e+06	1	2509500	5	968	20	2
1724300	108	556200	Gonville South	3702	Urban Ward	37	Wanganui District	08	Manawatu-Wanganui Region	2.68354e+06	6.13856e+06	1	1724300	10	1194	49	3
1724400	99	556200	Gonville South	3702	Urban Ward	37	Wanganui District	08	Manawatu-Wanganui Region	2.68373e+06	6.13861e+06	1	1724400	8	1030	45	3
2378300	93	584303	Motueka East	5104	Motueka Ward	51	Tasman District	16	Tasman Region	2.51092e+06	6.00944e+06	1	2378300	6	992	33	2
413300	222	514000	Freemans Bay	701	Western Bays Ward	7	Auckland City	02	Auckland Region	2.66688e+06	6.4815e+06	1	413300	9	1122	100	3
2509302	288	588101	Redwood North	6001	Shirley-Papanui Ward	60	Christchurch City	13	Canterbury Region	2.47937e+06	5.74795e+06	1	2509302	7	1020	101	2
1723500	138	556300	Gonville East	3702	Urban Ward	37	Wanganui District	08	Manawatu-Wanganui Region	2.68323e+06	6.13883e+06	1	1723500	7	1001	48	2
544200	12	518101	Mt Eden North	703	Eden-Albert Ward	7	Auckland City	02	Auckland Region	2.66658e+06	6.47981e+06	1	544200	4	948	4	2
413000	363	514000	Freemans Bay	701	Western Bays Ward	7	Auckland City	02	Auckland Region	2.66673e+06	6.48163e+06	1	413000	8	1043	163	3
543400	276	518102	Sherbourne	703	Eden-Albert Ward	7	Auckland City	02	Auckland Region	2.66735e+06	6.47929e+06	1	543400	6	992	97	2
2122300	27	572900	Thorndon-Tinakori Road	4703	Lambton Ward	47	Wellington City	09	Wellington Region	2.65844e+06	5.99068e+06	1	2122300	4	947	9	2
1592500	3	551800	New Plymouth Central	3301	New Plymouth City Ward	33	New Plymouth District	07	Taranaki Region	2.60309e+06	6.23808e+06	1	1592500	6	999	1	2
2641800	84	594800	Barrington North	6006	Spreydon-Heathcote Ward	60	Christchurch City	13	Canterbury Region	2.47912e+06	5.73874e+06	1	2641800	4	948	29	2
412800	57	514200	Newton	704	Hobson Ward	7	Auckland City	02	Auckland Region	2.66705e+06	6.48067e+06	1	412800	7	1007	20	2
543600	51	518101	Mt Eden North	703	Eden-Albert Ward	7	Auckland City	02	Auckland Region	2.66717e+06	6.47978e+06	1	543600	2	915	17	1
2379100	57	584301	Motueka West	5104	Motueka Ward	51	Tasman District	16	Tasman Region	2.51062e+06	6.01066e+06	1	2379100	7	1005	20	2
412401	123	514200	Newton	704	Hobson Ward	7	Auckland City	02	Auckland Region	2.66733e+06	6.48067e+06	1	412401	3	921	41	1
2379200	126	584301	Motueka West	5104	Motueka Ward	51	Tasman District	16	Tasman Region	2.51084e+06	6.01044e+06	1	2379200	7	1005	44	2
412700	27	514200	Newton	704	Hobson Ward	7	Auckland City	02	Auckland Region	2.66716e+06	6.48062e+06	1	412700	6	984	9	2
544100	120	518101	Mt Eden North	703	Eden-Albert Ward	7	Auckland City	02	Auckland Region	2.66726e+06	6.47951e+06	1	544100	6	998	42	2
1592700	3	551800	New Plymouth Central	3301	New Plymouth City Ward	33	New Plymouth District	07	Taranaki Region	2.60313e+06	6.23801e+06	1	1592700	6	999	1	2
543700	180	518101	Mt Eden North	703	Eden-Albert Ward	7	Auckland City	02	Auckland Region	2.66712e+06	6.47969e+06	1	543700	5	962	63	2
2510800	87	588300	Casebrook	6001	Shirley-Papanui Ward	60	Christchurch City	13	Canterbury Region	2.47736e+06	5.74638e+06	1	2510800	10	1249	39	3
2902600	219	603100	Stuart St-Frederick St	7103	Cargill Ward	71	Dunedin City	14	Otago Region	2.31576e+06	5.4788e+06	1	2902600	9	1089	99	3
2903500	45	603100	Stuart St-Frederick St	7103	Cargill Ward	71	Dunedin City	14	Otago Region	2.31591e+06	5.47875e+06	1	2903500	8	1032	20	3
1723900	153	556300	Gonville East	3702	Urban Ward	37	Wanganui District	08	Manawatu-Wanganui Region	2.68353e+06	6.13872e+06	1	1723900	8	1066	69	3
1723300	99	556300	Gonville East	3702	Urban Ward	37	Wanganui District	08	Manawatu-Wanganui Region	2.68337e+06	6.13928e+06	1	1723300	9	1130	45	3
544700	36	518101	Mt Eden North	703	Eden-Albert Ward	7	Auckland City	02	Auckland Region	2.66657e+06	6.4797e+06	1	544700	3	934	12	1
543500	102	518101	Mt Eden North	703	Eden-Albert Ward	7	Auckland City	02	Auckland Region	2.66721e+06	6.47983e+06	1	543500	4	950	36	2
412600	33	514200	Newton	704	Hobson Ward	7	Auckland City	02	Auckland Region	2.66719e+06	6.48073e+06	1	412600	6	984	12	2
543300	102	518102	Sherbourne	703	Eden-Albert Ward	7	Auckland City	02	Auckland Region	2.66718e+06	6.4793e+06	1	543300	7	1014	36	2
1592000	3	551800	New Plymouth Central	3301	New Plymouth City Ward	33	New Plymouth District	07	Taranaki Region	2.60285e+06	6.2379e+06	1	1592000	6	999	1	2
1592900	3	551800	New Plymouth Central	3301	New Plymouth City Ward	33	New Plymouth District	07	Taranaki Region	2.6032e+06	6.23791e+06	1	1592900	6	999	1	2
1592800	3	551800	New Plymouth Central	3301	New Plymouth City Ward	33	New Plymouth District	07	Taranaki Region	2.60306e+06	6.23786e+06	1	1592800	6	999	1	2
2510600	219	588300	Casebrook	6001	Shirley-Papanui Ward	60	Christchurch City	13	Canterbury Region	2.47745e+06	5.74658e+06	1	2510600	10	1139	99	3
2775701	105	599200	Glenwood	6404	Timaru Ward	64	Timaru District	13	Canterbury Region	2.36711e+06	5.64483e+06	1	2775701	4	953	37	2
2775300	132	599200	Glenwood	6404	Timaru Ward	64	Timaru District	13	Canterbury Region	2.36751e+06	5.64491e+06	1	2775300	3	932	44	1
2774905	165	599300	Gleniti	6404	Timaru Ward	64	Timaru District	13	Canterbury Region	2.36676e+06	5.64484e+06	1	2774905	4	951	58	2
2775600	144	599200	Glenwood	6404	Timaru Ward	64	Timaru District	13	Canterbury Region	2.36713e+06	5.64495e+06	1	2775600	2	905	48	1
2907200	69	604010	Roslyn North	7104	Hills Ward	71	Dunedin City	14	Otago Region	2.31481e+06	5.47964e+06	1	2907200	7	1013	24	2
2905900	126	604010	Roslyn North	7104	Hills Ward	71	Dunedin City	14	Otago Region	2.31557e+06	5.47962e+06	1	2905900	1	870	42	1
2907400	75	604010	Roslyn North	7104	Hills Ward	71	Dunedin City	14	Otago Region	2.31508e+06	5.47967e+06	1	2907400	3	920	25	1
2906001	93	604010	Roslyn North	7104	Hills Ward	71	Dunedin City	14	Otago Region	2.31553e+06	5.47956e+06	1	2906001	1	890	31	1
546500	120	518102	Sherbourne	703	Eden-Albert Ward	7	Auckland City	02	Auckland Region	2.66729e+06	6.47902e+06	1	546500	5	956	42	2
2119700	27	572900	Thorndon-Tinakori Road	4703	Lambton Ward	47	Wellington City	09	Wellington Region	2.65878e+06	5.99074e+06	1	2119700	5	967	9	2
1596500	123	552001	Mount Bryan	3301	New Plymouth City Ward	33	New Plymouth District	07	Taranaki Region	2.60433e+06	6.23828e+06	1	1596500	7	1013	43	2
2120400	93	572900	Thorndon-Tinakori Road	4703	Lambton Ward	47	Wellington City	09	Wellington Region	2.65889e+06	5.99141e+06	1	2120400	5	962	33	2
2644900	183	595000	Spreydon	6006	Spreydon-Heathcote Ward	60	Christchurch City	13	Canterbury Region	2.47994e+06	5.73942e+06	1	2644900	7	1003	64	2
2644600	93	595000	Spreydon	6006	Spreydon-Heathcote Ward	60	Christchurch City	13	Canterbury Region	2.47977e+06	5.73918e+06	1	2644600	7	1001	33	2
547700	240	518201	Balmoral	703	Eden-Albert Ward	7	Auckland City	02	Auckland Region	2.66705e+06	6.47859e+06	1	547700	5	972	84	2
545000	174	518101	Mt Eden North	703	Eden-Albert Ward	7	Auckland City	02	Auckland Region	2.66686e+06	6.47963e+06	1	545000	6	985	61	2
1594000	24	551800	New Plymouth Central	3301	New Plymouth City Ward	33	New Plymouth District	07	Taranaki Region	2.60361e+06	6.23818e+06	1	1594000	7	1013	8	2
2118800	6	572900	Thorndon-Tinakori Road	4703	Lambton Ward	47	Wellington City	09	Wellington Region	2.65909e+06	5.99101e+06	1	2118800	3	931	2	1
2119000	33	572900	Thorndon-Tinakori Road	4703	Lambton Ward	47	Wellington City	09	Wellington Region	2.65909e+06	5.99096e+06	1	2119000	3	931	11	1
2118500	6	572900	Thorndon-Tinakori Road	4703	Lambton Ward	47	Wellington City	09	Wellington Region	2.65905e+06	5.99137e+06	1	2118500	3	931	2	1
1725500	69	556200	Gonville South	3702	Urban Ward	37	Wanganui District	08	Manawatu-Wanganui Region	2.6838e+06	6.13836e+06	1	1725500	9	1101	31	3
1725600	177	556200	Gonville South	3702	Urban Ward	37	Wanganui District	08	Manawatu-Wanganui Region	2.68361e+06	6.13828e+06	1	1725600	10	1140	80	3
2774300	120	598700	Washdyke	6404	Timaru Ward	64	Timaru District	13	Canterbury Region	2.36957e+06	5.64701e+06	1	2774300	5	971	42	2
2380100	123	584301	Motueka West	5104	Motueka Ward	51	Tasman District	16	Tasman Region	2.51069e+06	6.00851e+06	1	2380100	7	1011	43	2
2379900	87	584301	Motueka West	5104	Motueka Ward	51	Tasman District	16	Tasman Region	2.51053e+06	6.00911e+06	1	2379900	7	1011	30	2
1593900	6	551800	New Plymouth Central	3301	New Plymouth City Ward	33	New Plymouth District	07	Taranaki Region	2.60332e+06	6.23808e+06	1	1593900	7	1013	2	2
2118300	201	572900	Thorndon-Tinakori Road	4703	Lambton Ward	47	Wellington City	09	Wellington Region	2.6593e+06	5.99086e+06	1	2118300	4	940	70	2
2643200	36	595000	Spreydon	6006	Spreydon-Heathcote Ward	60	Christchurch City	13	Canterbury Region	2.47931e+06	5.73902e+06	1	2643200	7	1004	13	2
2511700	195	588300	Casebrook	6001	Shirley-Papanui Ward	60	Christchurch City	13	Canterbury Region	2.47795e+06	5.74684e+06	1	2511700	9	1102	88	3
2512000	192	588200	Styx Mill	6001	Shirley-Papanui Ward	60	Christchurch City	13	Canterbury Region	2.47823e+06	5.74726e+06	1	2512000	4	953	67	2
2904500	48	604020	Roslyn South	7104	Hills Ward	71	Dunedin City	14	Otago Region	2.31465e+06	5.47895e+06	1	2904500	2	913	16	1
2904600	156	604020	Roslyn South	7104	Hills Ward	71	Dunedin City	14	Otago Region	2.31466e+06	5.47886e+06	1	2904600	1	892	51	1
1724800	114	556200	Gonville South	3702	Urban Ward	37	Wanganui District	08	Manawatu-Wanganui Region	2.68319e+06	6.13824e+06	1	1724800	7	1017	40	2
2904100	180	603100	Stuart St-Frederick St	7103	Cargill Ward	71	Dunedin City	14	Otago Region	2.31619e+06	5.47929e+06	1	2904100	6	995	63	2
413800	45	514000	Freemans Bay	701	Western Bays Ward	7	Auckland City	02	Auckland Region	2.66665e+06	6.48107e+06	1	413800	7	1011	16	2
545800	54	518102	Sherbourne	703	Eden-Albert Ward	7	Auckland City	02	Auckland Region	2.66666e+06	6.47948e+06	1	545800	3	924	18	1
544900	150	518101	Mt Eden North	703	Eden-Albert Ward	7	Auckland City	02	Auckland Region	2.66672e+06	6.47964e+06	1	544900	7	1014	52	2
1594600	39	551800	New Plymouth Central	3301	New Plymouth City Ward	33	New Plymouth District	07	Taranaki Region	2.60363e+06	6.23798e+06	1	1594600	6	981	14	2
1593500	9	551800	New Plymouth Central	3301	New Plymouth City Ward	33	New Plymouth District	07	Taranaki Region	2.60394e+06	6.23853e+06	1	1593500	6	981	3	2
2904700	105	604020	Roslyn South	7104	Hills Ward	71	Dunedin City	14	Otago Region	2.31433e+06	5.47869e+06	1	2904700	2	913	35	1
2904800	123	604020	Roslyn South	7104	Hills Ward	71	Dunedin City	14	Otago Region	2.31445e+06	5.47867e+06	1	2904800	3	932	41	1
1724500	147	556200	Gonville South	3702	Urban Ward	37	Wanganui District	08	Manawatu-Wanganui Region	2.68397e+06	6.13864e+06	1	1724500	8	1032	66	3
2774607	135	599300	Gleniti	6404	Timaru Ward	64	Timaru District	13	Canterbury Region	2.36602e+06	5.64566e+06	1	2774607	3	930	45	1
2905300	102	604020	Roslyn South	7104	Hills Ward	71	Dunedin City	14	Otago Region	2.31509e+06	5.47916e+06	1	2905300	5	971	36	2
2905201	42	604010	Roslyn North	7104	Hills Ward	71	Dunedin City	14	Otago Region	2.31528e+06	5.47923e+06	1	2905201	3	929	14	1
546400	141	518102	Sherbourne	703	Eden-Albert Ward	7	Auckland City	02	Auckland Region	2.66752e+06	6.47919e+06	1	546400	6	975	49	2
545300	123	518102	Sherbourne	703	Eden-Albert Ward	7	Auckland City	02	Auckland Region	2.66696e+06	6.47936e+06	1	545300	6	991	43	2
413900	120	514000	Freemans Bay	701	Western Bays Ward	7	Auckland City	02	Auckland Region	2.66681e+06	6.48114e+06	1	413900	2	913	40	1
2642003	36	594800	Barrington North	6006	Spreydon-Heathcote Ward	60	Christchurch City	13	Canterbury Region	2.47932e+06	5.73863e+06	1	2642003	4	940	13	2
2511100	132	588300	Casebrook	6001	Shirley-Papanui Ward	60	Christchurch City	13	Canterbury Region	2.47752e+06	5.74614e+06	1	2511100	10	1141	59	3
2643300	78	595000	Spreydon	6006	Spreydon-Heathcote Ward	60	Christchurch City	13	Canterbury Region	2.47942e+06	5.73888e+06	1	2643300	6	980	27	2
2511601	126	588300	Casebrook	6001	Shirley-Papanui Ward	60	Christchurch City	13	Canterbury Region	2.47779e+06	5.74716e+06	1	2511601	8	1036	57	3
2511602	183	588300	Casebrook	6001	Shirley-Papanui Ward	60	Christchurch City	13	Canterbury Region	2.47806e+06	5.74711e+06	1	2511602	8	1043	82	3
2511502	201	588300	Casebrook	6001	Shirley-Papanui Ward	60	Christchurch City	13	Canterbury Region	2.47766e+06	5.74708e+06	1	2511502	6	992	70	2
1725000	156	556200	Gonville South	3702	Urban Ward	37	Wanganui District	08	Manawatu-Wanganui Region	2.68311e+06	6.13799e+06	1	1725000	7	1029	55	2
545700	180	518102	Sherbourne	703	Eden-Albert Ward	7	Auckland City	02	Auckland Region	2.66696e+06	6.47918e+06	1	545700	6	982	63	2
2118900	39	572900	Thorndon-Tinakori Road	4703	Lambton Ward	47	Wellington City	09	Wellington Region	2.65918e+06	5.99107e+06	1	2118900	3	931	13	1
2118100	60	572900	Thorndon-Tinakori Road	4703	Lambton Ward	47	Wellington City	09	Wellington Region	2.65931e+06	5.99104e+06	1	2118100	3	927	20	1
2642001	42	594800	Barrington North	6006	Spreydon-Heathcote Ward	60	Christchurch City	13	Canterbury Region	2.47907e+06	5.73853e+06	1	2642001	4	940	15	2
1724700	123	556200	Gonville South	3702	Urban Ward	37	Wanganui District	08	Manawatu-Wanganui Region	2.68297e+06	6.13836e+06	1	1724700	7	1015	43	2
2905500	177	604020	Roslyn South	7104	Hills Ward	71	Dunedin City	14	Otago Region	2.31487e+06	5.47899e+06	1	2905500	3	928	58	1
2905600	87	604020	Roslyn South	7104	Hills Ward	71	Dunedin City	14	Otago Region	2.3151e+06	5.47905e+06	1	2905600	5	971	30	2
2774000	48	598700	Washdyke	6404	Timaru Ward	64	Timaru District	13	Canterbury Region	2.36973e+06	5.64808e+06	1	2774000	5	964	17	2
2773900	24	598700	Washdyke	6404	Timaru Ward	64	Timaru District	13	Canterbury Region	2.36946e+06	5.64867e+06	1	2773900	5	964	8	2
2774100	6	598700	Washdyke	6404	Timaru Ward	64	Timaru District	13	Canterbury Region	2.36995e+06	5.64837e+06	1	2774100	5	964	2	2
2774400	3	598700	Washdyke	6404	Timaru Ward	64	Timaru District	13	Canterbury Region	2.37005e+06	5.64701e+06	1	2774400	5	964	1	2
2774202	237	598700	Washdyke	6404	Timaru Ward	64	Timaru District	13	Canterbury Region	2.36985e+06	5.64725e+06	1	2774202	5	964	83	2
545200	108	518102	Sherbourne	703	Eden-Albert Ward	7	Auckland City	02	Auckland Region	2.66687e+06	6.4794e+06	1	545200	4	944	38	2
2122500	147	572900	Thorndon-Tinakori Road	4703	Lambton Ward	47	Wellington City	09	Wellington Region	2.65901e+06	5.99064e+06	1	2122500	6	985	51	2
1594900	63	552002	Marsland Hill	3301	New Plymouth City Ward	33	New Plymouth District	07	Taranaki Region	2.60402e+06	6.23812e+06	1	1594900	9	1077	28	3
2118200	93	572900	Thorndon-Tinakori Road	4703	Lambton Ward	47	Wellington City	09	Wellington Region	2.65934e+06	5.99096e+06	1	2118200	4	938	33	2
2188102	120	576001	Island Bay West	4705	Southern Ward	47	Wellington City	09	Wellington Region	2.65795e+06	5.98374e+06	1	2188102	3	935	40	1
2905700	72	604010	Roslyn North	7104	Hills Ward	71	Dunedin City	14	Otago Region	2.31542e+06	5.4798e+06	1	2905700	1	861	24	1
2380200	126	584303	Motueka East	5104	Motueka Ward	51	Tasman District	16	Tasman Region	2.51089e+06	6.0088e+06	1	2380200	9	1092	57	3
545500	72	518102	Sherbourne	703	Eden-Albert Ward	7	Auckland City	02	Auckland Region	2.6668e+06	6.47925e+06	1	545500	4	948	25	2
1594800	33	552002	Marsland Hill	3301	New Plymouth City Ward	33	New Plymouth District	07	Taranaki Region	2.60379e+06	6.23804e+06	1	1594800	9	1077	15	3
2118600	9	572900	Thorndon-Tinakori Road	4703	Lambton Ward	47	Wellington City	09	Wellington Region	2.65903e+06	5.99116e+06	1	2118600	3	931	3	1
2118000	171	572900	Thorndon-Tinakori Road	4703	Lambton Ward	47	Wellington City	09	Wellington Region	2.65924e+06	5.99117e+06	1	2118000	4	939	60	2
2512400	198	588200	Styx Mill	6001	Shirley-Papanui Ward	60	Christchurch City	13	Canterbury Region	2.47889e+06	5.74731e+06	1	2512400	9	1096	89	3
2512200	81	588200	Styx Mill	6001	Shirley-Papanui Ward	60	Christchurch City	13	Canterbury Region	2.47846e+06	5.74728e+06	1	2512200	10	1196	36	3
1724900	45	556200	Gonville South	3702	Urban Ward	37	Wanganui District	08	Manawatu-Wanganui Region	2.68295e+06	6.1382e+06	1	1724900	7	1017	16	2
1725700	174	556200	Gonville South	3702	Urban Ward	37	Wanganui District	08	Manawatu-Wanganui Region	2.68349e+06	6.13815e+06	1	1725700	5	967	61	2
2905100	27	604020	Roslyn South	7104	Hills Ward	71	Dunedin City	14	Otago Region	2.31506e+06	5.47928e+06	1	2905100	3	929	9	1
544800	15	518101	Mt Eden North	703	Eden-Albert Ward	7	Auckland City	02	Auckland Region	2.66656e+06	6.4796e+06	1	544800	6	979	5	2
545100	123	518102	Sherbourne	703	Eden-Albert Ward	7	Auckland City	02	Auckland Region	2.66675e+06	6.47944e+06	1	545100	6	990	43	2
545400	111	518102	Sherbourne	703	Eden-Albert Ward	7	Auckland City	02	Auckland Region	2.66707e+06	6.47933e+06	1	545400	6	987	39	2
1594500	15	551800	New Plymouth Central	3301	New Plymouth City Ward	33	New Plymouth District	07	Taranaki Region	2.60342e+06	6.2379e+06	1	1594500	6	981	5	2
546300	78	518102	Sherbourne	703	Eden-Albert Ward	7	Auckland City	02	Auckland Region	2.66734e+06	6.47913e+06	1	546300	3	924	26	1
2642002	57	594800	Barrington North	6006	Spreydon-Heathcote Ward	60	Christchurch City	13	Canterbury Region	2.4792e+06	5.73856e+06	1	2642002	4	940	20	2
2511000	117	588300	Casebrook	6001	Shirley-Papanui Ward	60	Christchurch City	13	Canterbury Region	2.47729e+06	5.74627e+06	1	2511000	8	1036	53	3
2511800	129	588300	Casebrook	6001	Shirley-Papanui Ward	60	Christchurch City	13	Canterbury Region	2.47794e+06	5.74662e+06	1	2511800	8	1059	58	3
2908400	177	604020	Roslyn South	7104	Hills Ward	71	Dunedin City	14	Otago Region	2.31433e+06	5.47905e+06	1	2908400	3	919	58	1
2908300	141	604020	Roslyn South	7104	Hills Ward	71	Dunedin City	14	Otago Region	2.31469e+06	5.47913e+06	1	2908300	2	903	47	1
2908700	21	604020	Roslyn South	7104	Hills Ward	71	Dunedin City	14	Otago Region	2.31413e+06	5.47918e+06	1	2908700	4	939	7	2
681308	3	522722	Aberfeldy	806	Howick Ward	8	Manukau City	02	Auckland Region	2.68045e+06	6.47628e+06	1	681308	8	1032	1	3
2121300	3	572900	Thorndon-Tinakori Road	4703	Lambton Ward	47	Wellington City	09	Wellington Region	2.65888e+06	5.99074e+06	1	2121300	7	1009	1	2
1598000	9	552100	Fitzroy	3301	New Plymouth City Ward	33	New Plymouth District	07	Taranaki Region	2.60482e+06	6.23829e+06	1	1598000	4	944	3	2
2513000	183	588200	Styx Mill	6001	Shirley-Papanui Ward	60	Christchurch City	13	Canterbury Region	2.47874e+06	5.74805e+06	1	2513000	3	924	60	1
2513100	141	588200	Styx Mill	6001	Shirley-Papanui Ward	60	Christchurch City	13	Canterbury Region	2.47893e+06	5.74809e+06	1	2513100	5	956	49	2
2774801	165	599300	Gleniti	6404	Timaru Ward	64	Timaru District	13	Canterbury Region	2.36611e+06	5.64539e+06	1	2774801	2	905	54	1
678502	132	522603	Bleakhouse	806	Howick Ward	8	Manukau City	02	Auckland Region	2.68171e+06	6.47782e+06	1	678502	1	886	44	1
547100	111	518102	Sherbourne	703	Eden-Albert Ward	7	Auckland City	02	Auckland Region	2.66733e+06	6.47887e+06	1	547100	7	1017	39	2
1596600	96	552001	Mount Bryan	3301	New Plymouth City Ward	33	New Plymouth District	07	Taranaki Region	2.60437e+06	6.23813e+06	1	1596600	5	967	34	2
2119400	33	572900	Thorndon-Tinakori Road	4703	Lambton Ward	47	Wellington City	09	Wellington Region	2.65883e+06	5.99098e+06	1	2119400	6	977	12	2
678801	285	522603	Bleakhouse	806	Howick Ward	8	Manukau City	02	Auckland Region	2.68176e+06	6.47758e+06	1	678801	4	935	100	2
2645200	123	595400	Somerfield	6006	Spreydon-Heathcote Ward	60	Christchurch City	13	Canterbury Region	2.47949e+06	5.73879e+06	1	2645200	4	936	43	2
678602	45	522603	Bleakhouse	806	Howick Ward	8	Manukau City	02	Auckland Region	2.68197e+06	6.47768e+06	1	678602	1	886	15	1
1726300	81	556200	Gonville South	3702	Urban Ward	37	Wanganui District	08	Manawatu-Wanganui Region	2.68411e+06	6.13838e+06	1	1726300	6	994	28	2
2906300	168	604010	Roslyn North	7104	Hills Ward	71	Dunedin City	14	Otago Region	2.3152e+06	5.47941e+06	1	2906300	1	895	55	1
2907500	21	604010	Roslyn North	7104	Hills Ward	71	Dunedin City	14	Otago Region	2.31479e+06	5.47948e+06	1	2907500	4	951	7	2
2775500	249	599200	Glenwood	6404	Timaru Ward	64	Timaru District	13	Canterbury Region	2.36708e+06	5.64515e+06	1	2775500	2	900	82	1
2774803	90	599300	Gleniti	6404	Timaru Ward	64	Timaru District	13	Canterbury Region	2.36651e+06	5.64528e+06	1	2774803	4	940	31	2
2774804	99	599300	Gleniti	6404	Timaru Ward	64	Timaru District	13	Canterbury Region	2.36675e+06	5.64526e+06	1	2774804	4	940	35	2
678601	126	522603	Bleakhouse	806	Howick Ward	8	Manukau City	02	Auckland Region	2.68201e+06	6.47781e+06	1	678601	1	886	42	1
1596000	150	552001	Mount Bryan	3301	New Plymouth City Ward	33	New Plymouth District	07	Taranaki Region	2.60412e+06	6.23866e+06	1	1596000	5	957	52	2
1595800	150	552001	Mount Bryan	3301	New Plymouth City Ward	33	New Plymouth District	07	Taranaki Region	2.60382e+06	6.23868e+06	1	1595800	7	1007	52	2
2645100	150	595400	Somerfield	6006	Spreydon-Heathcote Ward	60	Christchurch City	13	Canterbury Region	2.47978e+06	5.73903e+06	1	2645100	6	983	52	2
2644400	84	595000	Spreydon	6006	Spreydon-Heathcote Ward	60	Christchurch City	13	Canterbury Region	2.47957e+06	5.73904e+06	1	2644400	7	1001	29	2
546700	168	518102	Sherbourne	703	Eden-Albert Ward	7	Auckland City	02	Auckland Region	2.66752e+06	6.47871e+06	1	546700	4	947	59	2
1727400	36	557000	Spriggens Park	3702	Urban Ward	37	Wanganui District	08	Manawatu-Wanganui Region	2.68456e+06	6.13825e+06	1	1727400	9	1131	16	3
2774805	78	599300	Gleniti	6404	Timaru Ward	64	Timaru District	13	Canterbury Region	2.36647e+06	5.64517e+06	1	2774805	4	940	27	2
2775100	84	599200	Glenwood	6404	Timaru Ward	64	Timaru District	13	Canterbury Region	2.36744e+06	5.64511e+06	1	2775100	9	1100	38	3
2907000	27	604010	Roslyn North	7104	Hills Ward	71	Dunedin City	14	Otago Region	2.31525e+06	5.47978e+06	1	2907000	4	949	9	2
2120000	78	572900	Thorndon-Tinakori Road	4703	Lambton Ward	47	Wellington City	09	Wellington Region	2.65863e+06	5.99076e+06	1	2120000	5	967	27	2
1596300	123	552001	Mount Bryan	3301	New Plymouth City Ward	33	New Plymouth District	07	Taranaki Region	2.60449e+06	6.23846e+06	1	1596300	5	962	43	2
1596100	39	552001	Mount Bryan	3301	New Plymouth City Ward	33	New Plymouth District	07	Taranaki Region	2.60419e+06	6.23851e+06	1	1596100	5	967	14	2
416700	66	514000	Freemans Bay	701	Western Bays Ward	7	Auckland City	02	Auckland Region	2.66664e+06	6.4821e+06	1	416700	2	900	22	1
2512900	219	588200	Styx Mill	6001	Shirley-Papanui Ward	60	Christchurch City	13	Canterbury Region	2.47892e+06	5.74833e+06	1	2512900	5	972	77	2
678400	237	522603	Bleakhouse	806	Howick Ward	8	Manukau City	02	Auckland Region	2.68192e+06	6.47806e+06	1	678400	1	884	78	1
2906600	27	604010	Roslyn North	7104	Hills Ward	71	Dunedin City	14	Otago Region	2.31557e+06	5.47926e+06	1	2906600	3	922	9	1
2906500	24	604010	Roslyn North	7104	Hills Ward	71	Dunedin City	14	Otago Region	2.31552e+06	5.47921e+06	1	2906500	3	922	8	1
547002	60	518102	Sherbourne	703	Eden-Albert Ward	7	Auckland City	02	Auckland Region	2.66715e+06	6.47877e+06	1	547002	7	1000	21	2
2079000	93	573800	Johnsonville East	4701	Northern Ward	47	Wellington City	09	Wellington Region	2.66186e+06	5.997e+06	1	2079000	4	953	33	2
678200	201	522603	Bleakhouse	806	Howick Ward	8	Manukau City	02	Auckland Region	2.68177e+06	6.4783e+06	1	678200	1	896	66	1
2120100	45	572900	Thorndon-Tinakori Road	4703	Lambton Ward	47	Wellington City	09	Wellington Region	2.65846e+06	5.99074e+06	1	2120100	5	967	16	2
2119900	15	572900	Thorndon-Tinakori Road	4703	Lambton Ward	47	Wellington City	09	Wellington Region	2.65868e+06	5.99072e+06	1	2119900	5	967	5	2
2120900	138	572900	Thorndon-Tinakori Road	4703	Lambton Ward	47	Wellington City	09	Wellington Region	2.65866e+06	5.9911e+06	1	2120900	4	950	48	2
1596400	69	552001	Mount Bryan	3301	New Plymouth City Ward	33	New Plymouth District	07	Taranaki Region	2.60425e+06	6.23842e+06	1	1596400	7	1009	24	2
2120300	84	572900	Thorndon-Tinakori Road	4703	Lambton Ward	47	Wellington City	09	Wellington Region	2.65903e+06	5.99151e+06	1	2120300	2	904	28	1
2644500	105	595000	Spreydon	6006	Spreydon-Heathcote Ward	60	Christchurch City	13	Canterbury Region	2.47966e+06	5.7392e+06	1	2644500	9	1126	47	3
2775800	120	599200	Glenwood	6404	Timaru Ward	64	Timaru District	13	Canterbury Region	2.36744e+06	5.64473e+06	1	2775800	3	920	40	1
2091400	120	574302	Te Kainga	4702	Onslow-Western Ward	47	Wellington City	09	Wellington Region	2.66031e+06	5.99378e+06	1	2091400	1	855	40	1
1726900	123	557000	Spriggens Park	3702	Urban Ward	37	Wanganui District	08	Manawatu-Wanganui Region	2.68435e+06	6.13852e+06	1	1726900	9	1074	55	3
2906700	96	604010	Roslyn North	7104	Hills Ward	71	Dunedin City	14	Otago Region	2.31535e+06	5.48005e+06	1	2906700	3	932	32	1
2906100	129	604010	Roslyn North	7104	Hills Ward	71	Dunedin City	14	Otago Region	2.31549e+06	5.47947e+06	1	2906100	2	910	43	1
547400	153	518201	Balmoral	703	Eden-Albert Ward	7	Auckland City	02	Auckland Region	2.66696e+06	6.47878e+06	1	547400	4	936	54	2
546800	204	518102	Sherbourne	703	Eden-Albert Ward	7	Auckland City	02	Auckland Region	2.66714e+06	6.47909e+06	1	546800	6	978	71	2
678802	39	522603	Bleakhouse	806	Howick Ward	8	Manukau City	02	Auckland Region	2.68201e+06	6.47759e+06	1	678802	1	891	13	1
2121000	159	572900	Thorndon-Tinakori Road	4703	Lambton Ward	47	Wellington City	09	Wellington Region	2.65859e+06	5.99101e+06	1	2121000	3	926	52	1
2120500	99	572900	Thorndon-Tinakori Road	4703	Lambton Ward	47	Wellington City	09	Wellington Region	2.65894e+06	5.99136e+06	1	2120500	3	927	33	1
1727100	30	557000	Spriggens Park	3702	Urban Ward	37	Wanganui District	08	Manawatu-Wanganui Region	2.68459e+06	6.13844e+06	1	1727100	9	1131	14	3
2906200	66	604010	Roslyn North	7104	Hills Ward	71	Dunedin City	14	Otago Region	2.31532e+06	5.47956e+06	1	2906200	1	890	22	1
2775202	123	599200	Glenwood	6404	Timaru Ward	64	Timaru District	13	Canterbury Region	2.36756e+06	5.6453e+06	1	2775202	8	1064	55	3
2775402	204	599200	Glenwood	6404	Timaru Ward	64	Timaru District	13	Canterbury Region	2.36721e+06	5.64534e+06	1	2775402	6	977	71	2
2906800	72	604010	Roslyn North	7104	Hills Ward	71	Dunedin City	14	Otago Region	2.31528e+06	5.47994e+06	1	2906800	3	932	24	1
964900	63	527503	Cambridge Central	1702	Cambridge Ward	17	Waipa District	03	Waikato Region	2.7272e+06	6.36466e+06	1	964900	6	985	22	2
2119600	36	572900	Thorndon-Tinakori Road	4703	Lambton Ward	47	Wellington City	09	Wellington Region	2.65889e+06	5.99096e+06	1	2119600	6	977	13	2
416800	48	514000	Freemans Bay	701	Western Bays Ward	7	Auckland City	02	Auckland Region	2.66669e+06	6.48198e+06	1	416800	2	900	16	1
2906400	117	604010	Roslyn North	7104	Hills Ward	71	Dunedin City	14	Otago Region	2.31539e+06	5.47935e+06	1	2906400	3	922	39	1
2906900	90	604010	Roslyn North	7104	Hills Ward	71	Dunedin City	14	Otago Region	2.31513e+06	5.47981e+06	1	2906900	4	949	31	2
546900	96	518102	Sherbourne	703	Eden-Albert Ward	7	Auckland City	02	Auckland Region	2.66708e+06	6.4789e+06	1	546900	4	944	34	2
417100	51	514000	Freemans Bay	701	Western Bays Ward	7	Auckland City	02	Auckland Region	2.66661e+06	6.48188e+06	1	417100	6	975	18	2
547200	111	518102	Sherbourne	703	Eden-Albert Ward	7	Auckland City	02	Auckland Region	2.66734e+06	6.47871e+06	1	547200	6	981	39	2
1596200	12	552001	Mount Bryan	3301	New Plymouth City Ward	33	New Plymouth District	07	Taranaki Region	2.60446e+06	6.23857e+06	1	1596200	5	967	4	2
1595900	66	552001	Mount Bryan	3301	New Plymouth City Ward	33	New Plymouth District	07	Taranaki Region	2.60385e+06	6.2386e+06	1	1595900	5	958	23	2
1595700	57	552001	Mount Bryan	3301	New Plymouth City Ward	33	New Plymouth District	07	Taranaki Region	2.60355e+06	6.23858e+06	1	1595700	7	1007	20	2
2120700	126	572900	Thorndon-Tinakori Road	4703	Lambton Ward	47	Wellington City	09	Wellington Region	2.65875e+06	5.99123e+06	1	2120700	6	985	44	2
2645300	111	595400	Somerfield	6006	Spreydon-Heathcote Ward	60	Christchurch City	13	Canterbury Region	2.47987e+06	5.73895e+06	1	2645300	7	1029	39	2
546600	93	518102	Sherbourne	703	Eden-Albert Ward	7	Auckland City	02	Auckland Region	2.66746e+06	6.47901e+06	1	546600	6	989	33	2
2644300	129	595000	Spreydon	6006	Spreydon-Heathcote Ward	60	Christchurch City	13	Canterbury Region	2.47956e+06	5.73926e+06	1	2644300	5	962	45	2
1726800	45	557000	Spriggens Park	3702	Urban Ward	37	Wanganui District	08	Manawatu-Wanganui Region	2.68408e+06	6.1387e+06	1	1726800	9	1074	20	3
2775201	102	599200	Glenwood	6404	Timaru Ward	64	Timaru District	13	Canterbury Region	2.36758e+06	5.64503e+06	1	2775201	8	1064	46	3
2774903	90	599300	Gleniti	6404	Timaru Ward	64	Timaru District	13	Canterbury Region	2.36638e+06	5.64503e+06	1	2774903	4	951	31	2
2774904	57	599300	Gleniti	6404	Timaru Ward	64	Timaru District	13	Canterbury Region	2.36665e+06	5.64504e+06	1	2774904	4	951	20	2
2774902	126	599300	Gleniti	6404	Timaru Ward	64	Timaru District	13	Canterbury Region	2.3668e+06	5.64498e+06	1	2774902	5	958	44	2
2907300	108	604010	Roslyn North	7104	Hills Ward	71	Dunedin City	14	Otago Region	2.31495e+06	5.47965e+06	1	2907300	6	984	38	2
2905800	45	604010	Roslyn North	7104	Hills Ward	71	Dunedin City	14	Otago Region	2.31555e+06	5.47976e+06	1	2905800	1	861	15	1
678501	222	522603	Bleakhouse	806	Howick Ward	8	Manukau City	02	Auckland Region	2.68166e+06	6.478e+06	1	678501	1	896	73	1
547001	102	518102	Sherbourne	703	Eden-Albert Ward	7	Auckland City	02	Auckland Region	2.66724e+06	6.47892e+06	1	547001	7	1000	36	2
2120200	30	572900	Thorndon-Tinakori Road	4703	Lambton Ward	47	Wellington City	09	Wellington Region	2.65895e+06	5.99159e+06	1	2120200	5	962	10	2
419300	30	515500	Arch Hill	701	Western Bays Ward	7	Auckland City	02	Auckland Region	2.66598e+06	6.48009e+06	1	419300	3	918	10	1
550400	99	518202	Mt Eden East	703	Eden-Albert Ward	7	Auckland City	02	Auckland Region	2.66727e+06	6.4783e+06	1	550400	5	959	35	2
681338	150	522722	Aberfeldy	806	Howick Ward	8	Manukau City	02	Auckland Region	2.68043e+06	6.4751e+06	1	681338	4	949	52	2
2516900	171	589000	Wairarapa	6002	Fendalton-Waimairi Ward	60	Christchurch City	13	Canterbury Region	2.47626e+06	5.74524e+06	1	2516900	4	939	60	2
419400	129	515500	Arch Hill	701	Western Bays Ward	7	Auckland City	02	Auckland Region	2.66609e+06	6.48016e+06	1	419400	3	920	43	1
681329	159	522722	Aberfeldy	806	Howick Ward	8	Manukau City	02	Auckland Region	2.68054e+06	6.47593e+06	1	681329	7	1017	56	2
549600	66	518201	Balmoral	703	Eden-Albert Ward	7	Auckland City	02	Auckland Region	2.6669e+06	6.47829e+06	1	549600	5	954	23	2
1598102	45	552100	Fitzroy	3301	New Plymouth City Ward	33	New Plymouth District	07	Taranaki Region	2.6051e+06	6.23826e+06	1	1598102	5	961	16	2
1597000	75	552100	Fitzroy	3301	New Plymouth City Ward	33	New Plymouth District	07	Taranaki Region	2.60475e+06	6.23881e+06	1	1597000	3	931	25	1
2908500	72	604020	Roslyn South	7104	Hills Ward	71	Dunedin City	14	Otago Region	2.31447e+06	5.47895e+06	1	2908500	2	908	24	1
417300	33	514000	Freemans Bay	701	Western Bays Ward	7	Auckland City	02	Auckland Region	2.66674e+06	6.48177e+06	1	417300	6	975	12	2
1597300	132	552100	Fitzroy	3301	New Plymouth City Ward	33	New Plymouth District	07	Taranaki Region	2.60516e+06	6.2387e+06	1	1597300	7	1026	46	2
1597100	45	552100	Fitzroy	3301	New Plymouth City Ward	33	New Plymouth District	07	Taranaki Region	2.60458e+06	6.23869e+06	1	1597100	3	931	15	1
418500	18	515500	Arch Hill	701	Western Bays Ward	7	Auckland City	02	Auckland Region	2.66619e+06	6.48017e+06	1	418500	5	966	6	2
2908200	90	604020	Roslyn South	7104	Hills Ward	71	Dunedin City	14	Otago Region	2.31485e+06	5.47931e+06	1	2908200	7	1026	31	2
2907900	90	604020	Roslyn South	7104	Hills Ward	71	Dunedin City	14	Otago Region	2.31457e+06	5.47932e+06	1	2907900	8	1057	40	3
2121200	144	572900	Thorndon-Tinakori Road	4703	Lambton Ward	47	Wellington City	09	Wellington Region	2.65902e+06	5.99082e+06	1	2121200	7	1009	50	2
1597500	36	552100	Fitzroy	3301	New Plymouth City Ward	33	New Plymouth District	07	Taranaki Region	2.60513e+06	6.23855e+06	1	1597500	4	941	13	2
1597700	66	552100	Fitzroy	3301	New Plymouth City Ward	33	New Plymouth District	07	Taranaki Region	2.6047e+06	6.2385e+06	1	1597700	5	958	23	2
2908100	114	604020	Roslyn South	7104	Hills Ward	71	Dunedin City	14	Otago Region	2.3146e+06	5.47919e+06	1	2908100	4	952	40	2
681332	72	522722	Aberfeldy	806	Howick Ward	8	Manukau City	02	Auckland Region	2.68022e+06	6.475e+06	1	681332	5	967	25	2
418400	90	515500	Arch Hill	701	Western Bays Ward	7	Auckland City	02	Auckland Region	2.66625e+06	6.48026e+06	1	418400	5	966	31	2
417600	153	515500	Arch Hill	701	Western Bays Ward	7	Auckland City	02	Auckland Region	2.6667e+06	6.4808e+06	1	417600	5	967	54	2
1598101	126	552100	Fitzroy	3301	New Plymouth City Ward	33	New Plymouth District	07	Taranaki Region	2.605e+06	6.23836e+06	1	1598101	5	961	44	2
1597900	36	552100	Fitzroy	3301	New Plymouth City Ward	33	New Plymouth District	07	Taranaki Region	2.60514e+06	6.2384e+06	1	1597900	4	944	13	2
2645400	45	595400	Somerfield	6006	Spreydon-Heathcote Ward	60	Christchurch City	13	Canterbury Region	2.47999e+06	5.73893e+06	1	2645400	7	1029	16	2
2645800	159	595400	Somerfield	6006	Spreydon-Heathcote Ward	60	Christchurch City	13	Canterbury Region	2.48015e+06	5.73918e+06	1	2645800	2	912	52	1
2908900	63	604020	Roslyn South	7104	Hills Ward	71	Dunedin City	14	Otago Region	2.31412e+06	5.47869e+06	1	2908900	1	884	21	1
2907700	39	604010	Roslyn North	7104	Hills Ward	71	Dunedin City	14	Otago Region	2.31512e+06	5.47951e+06	1	2907700	3	920	13	1
417800	15	515500	Arch Hill	701	Western Bays Ward	7	Auckland City	02	Auckland Region	2.66645e+06	6.48065e+06	1	417800	6	979	5	2
2907600	96	604010	Roslyn North	7104	Hills Ward	71	Dunedin City	14	Otago Region	2.31496e+06	5.47951e+06	1	2907600	4	951	34	2
2908600	102	604020	Roslyn South	7104	Hills Ward	71	Dunedin City	14	Otago Region	2.31409e+06	5.47883e+06	1	2908600	4	939	36	2
681324	186	522722	Aberfeldy	806	Howick Ward	8	Manukau City	02	Auckland Region	2.68023e+06	6.47604e+06	1	681324	7	1029	65	2
2122400	63	572900	Thorndon-Tinakori Road	4703	Lambton Ward	47	Wellington City	09	Wellington Region	2.65862e+06	5.99066e+06	1	2122400	4	947	22	2
1597200	135	552100	Fitzroy	3301	New Plymouth City Ward	33	New Plymouth District	07	Taranaki Region	2.60505e+06	6.23888e+06	1	1597200	5	970	47	2
2645500	165	595400	Somerfield	6006	Spreydon-Heathcote Ward	60	Christchurch City	13	Canterbury Region	2.47954e+06	5.73862e+06	1	2645500	5	972	58	2
2645900	186	595400	Somerfield	6006	Spreydon-Heathcote Ward	60	Christchurch City	13	Canterbury Region	2.48022e+06	5.73908e+06	1	2645900	5	964	65	2
680601	204	522712	Murvale	806	Howick Ward	8	Manukau City	02	Auckland Region	2.68145e+06	6.47761e+06	1	680601	3	928	67	1
2907800	30	603910	Wakari	7104	Hills Ward	71	Dunedin City	14	Otago Region	2.31454e+06	5.47944e+06	1	2907800	8	1057	14	3
418000	57	515500	Arch Hill	701	Western Bays Ward	7	Auckland City	02	Auckland Region	2.66643e+06	6.48052e+06	1	418000	6	979	20	2
2121700	81	572900	Thorndon-Tinakori Road	4703	Lambton Ward	47	Wellington City	09	Wellington Region	2.65832e+06	5.99056e+06	1	2121700	4	943	28	2
2121100	30	572900	Thorndon-Tinakori Road	4703	Lambton Ward	47	Wellington City	09	Wellington Region	2.65885e+06	5.99086e+06	1	2121100	7	1009	10	2
1597800	57	552100	Fitzroy	3301	New Plymouth City Ward	33	New Plymouth District	07	Taranaki Region	2.60479e+06	6.23853e+06	1	1597800	5	958	20	2
1597400	123	552100	Fitzroy	3301	New Plymouth City Ward	33	New Plymouth District	07	Taranaki Region	2.60496e+06	6.23864e+06	1	1597400	4	941	43	2
1597600	30	552100	Fitzroy	3301	New Plymouth City Ward	33	New Plymouth District	07	Taranaki Region	2.60525e+06	6.23858e+06	1	1597600	4	941	10	2
2645700	144	595400	Somerfield	6006	Spreydon-Heathcote Ward	60	Christchurch City	13	Canterbury Region	2.48006e+06	5.73926e+06	1	2645700	7	1005	50	2
2908800	102	604020	Roslyn South	7104	Hills Ward	71	Dunedin City	14	Otago Region	2.31426e+06	5.47875e+06	1	2908800	2	908	34	1
2908000	99	604020	Roslyn South	7104	Hills Ward	71	Dunedin City	14	Otago Region	2.31438e+06	5.47924e+06	1	2908000	5	968	35	2
417500	30	515500	Arch Hill	701	Western Bays Ward	7	Auckland City	02	Auckland Region	2.66665e+06	6.4808e+06	1	417500	6	979	10	2
418200	72	515500	Arch Hill	701	Western Bays Ward	7	Auckland City	02	Auckland Region	2.66605e+06	6.48026e+06	1	418200	3	922	24	1
2121800	48	572900	Thorndon-Tinakori Road	4703	Lambton Ward	47	Wellington City	09	Wellington Region	2.6583e+06	5.9905e+06	1	2121800	4	943	17	2
417900	15	515500	Arch Hill	701	Western Bays Ward	7	Auckland City	02	Auckland Region	2.66648e+06	6.48055e+06	1	417900	6	979	5	2
418300	96	515500	Arch Hill	701	Western Bays Ward	7	Auckland City	02	Auckland Region	2.66618e+06	6.48035e+06	1	418300	3	922	32	1
289100	192	512100	Green Bay	604	New Lynn Ward	6	Waitakere City	02	Auckland Region	2.66078e+06	6.47326e+06	1	289100	6	986	67	2
420100	78	515600	Eden Terrace	704	Hobson Ward	7	Auckland City	02	Auckland Region	2.66678e+06	6.48049e+06	1	420100	9	1092	35	3
2780800	117	599000	Maori Park	6404	Timaru Ward	64	Timaru District	13	Canterbury Region	2.36992e+06	5.64492e+06	1	2780800	5	973	41	2
2780900	69	599000	Maori Park	6404	Timaru Ward	64	Timaru District	13	Canterbury Region	2.37013e+06	5.64489e+06	1	2780900	8	1056	31	3
290600	192	512100	Green Bay	604	New Lynn Ward	6	Waitakere City	02	Auckland Region	2.65954e+06	6.47285e+06	1	290600	3	920	63	1
1469100	33	545761	Irongate	3003	Heretaunga Ward	30	Hastings District	06	Hawke's Bay Region	2.83833e+06	6.16527e+06	1	1469100	4	943	12	2
1469301	3	545761	Irongate	3005	Hastings Ward	30	Hastings District	06	Hawke's Bay Region	2.83854e+06	6.16575e+06	1	1469301	3	921	1	1
289901	66	512100	Green Bay	604	New Lynn Ward	6	Waitakere City	02	Auckland Region	2.65964e+06	6.47342e+06	1	289901	6	993	23	2
2125300	3	573000	Lambton	4703	Lambton Ward	47	Wellington City	09	Wellington Region	2.65883e+06	5.99008e+06	1	2125300	8	1047	1	3
420200	162	515600	Eden Terrace	704	Hobson Ward	7	Auckland City	02	Auckland Region	2.66696e+06	6.48051e+06	1	420200	3	932	53	1
2124700	3	573000	Lambton	4703	Lambton Ward	47	Wellington City	09	Wellington Region	2.65864e+06	5.99009e+06	1	2124700	5	970	1	2
2124900	261	573000	Lambton	4703	Lambton Ward	47	Wellington City	09	Wellington Region	2.65843e+06	5.98995e+06	1	2124900	10	1144	117	3
419900	126	515600	Eden Terrace	704	Hobson Ward	7	Auckland City	02	Auckland Region	2.66673e+06	6.48035e+06	1	419900	6	987	44	2
2780100	60	599000	Maori Park	6404	Timaru Ward	64	Timaru District	13	Canterbury Region	2.37008e+06	5.64551e+06	1	2780100	4	946	21	2
419701	171	515600	Eden Terrace	704	Hobson Ward	7	Auckland City	02	Auckland Region	2.66694e+06	6.48004e+06	1	419701	7	1019	60	2
2647600	144	591500	Cathedral Square	6005	Hagley-Ferrymead Ward	60	Christchurch City	13	Canterbury Region	2.47934e+06	5.74086e+06	1	2647600	6	994	50	2
2647700	93	591500	Cathedral Square	6005	Hagley-Ferrymead Ward	60	Christchurch City	13	Canterbury Region	2.47952e+06	5.74087e+06	1	2647700	6	994	33	2
290000	204	512100	Green Bay	604	New Lynn Ward	6	Waitakere City	02	Auckland Region	2.65977e+06	6.47357e+06	1	290000	4	945	71	2
290400	147	512100	Green Bay	604	New Lynn Ward	6	Waitakere City	02	Auckland Region	2.6597e+06	6.47306e+06	1	290400	4	938	51	2
420700	30	515600	Eden Terrace	704	Hobson Ward	7	Auckland City	02	Auckland Region	2.66707e+06	6.48035e+06	1	420700	7	1006	10	2
681326	123	522722	Aberfeldy	806	Howick Ward	8	Manukau City	02	Auckland Region	2.6803e+06	6.47587e+06	1	681326	6	993	43	2
681600	213	522723	Elsmore Park	803	Pakuranga Ward	8	Manukau City	02	Auckland Region	2.67908e+06	6.47566e+06	1	681600	7	1014	75	2
419600	129	515600	Eden Terrace	704	Hobson Ward	7	Auckland City	02	Auckland Region	2.66665e+06	6.48027e+06	1	419600	5	956	45	2
418600	81	515500	Arch Hill	701	Western Bays Ward	7	Auckland City	02	Auckland Region	2.66631e+06	6.48039e+06	1	418600	4	951	28	2
681334	120	522722	Aberfeldy	806	Howick Ward	8	Manukau City	02	Auckland Region	2.68026e+06	6.47467e+06	1	681334	3	919	40	1
2123200	78	572900	Thorndon-Tinakori Road	4703	Lambton Ward	47	Wellington City	09	Wellington Region	2.65826e+06	5.99064e+06	1	2123200	5	967	27	2
2123900	237	573000	Lambton	4703	Lambton Ward	47	Wellington City	09	Wellington Region	2.6586e+06	5.99031e+06	1	2123900	10	1246	107	3
681311	225	522722	Aberfeldy	806	Howick Ward	8	Manukau City	02	Auckland Region	2.68093e+06	6.47601e+06	1	681311	4	953	79	2
2122900	99	572900	Thorndon-Tinakori Road	4703	Lambton Ward	47	Wellington City	09	Wellington Region	2.65852e+06	5.99095e+06	1	2122900	4	941	35	2
1599400	78	552100	Fitzroy	3301	New Plymouth City Ward	33	New Plymouth District	07	Taranaki Region	2.60558e+06	6.23902e+06	1	1599400	7	1023	27	2
1599500	51	552100	Fitzroy	3301	New Plymouth City Ward	33	New Plymouth District	07	Taranaki Region	2.60537e+06	6.23896e+06	1	1599500	5	955	18	2
681317	261	522722	Aberfeldy	806	Howick Ward	8	Manukau City	02	Auckland Region	2.68041e+06	6.47555e+06	1	681317	5	962	91	2
419000	78	515500	Arch Hill	701	Western Bays Ward	7	Auckland City	02	Auckland Region	2.66586e+06	6.48019e+06	1	419000	3	918	26	1
681318	156	522722	Aberfeldy	806	Howick Ward	8	Manukau City	02	Auckland Region	2.6806e+06	6.47555e+06	1	681318	3	925	51	1
681337	201	522722	Aberfeldy	806	Howick Ward	8	Manukau City	02	Auckland Region	2.68034e+06	6.4751e+06	1	681337	6	981	70	2
420000	84	515600	Eden Terrace	704	Hobson Ward	7	Auckland City	02	Auckland Region	2.66667e+06	6.48043e+06	1	420000	9	1092	38	3
681303	207	522722	Aberfeldy	806	Howick Ward	8	Manukau City	02	Auckland Region	2.68078e+06	6.47581e+06	1	681303	5	967	72	2
681202	267	522721	Pigeon Mountain South	803	Pakuranga Ward	8	Manukau City	02	Auckland Region	2.6791e+06	6.47589e+06	1	681202	5	965	93	2
2123400	81	572900	Thorndon-Tinakori Road	4703	Lambton Ward	47	Wellington City	09	Wellington Region	2.65814e+06	5.99055e+06	1	2123400	4	949	28	2
681700	198	522723	Elsmore Park	803	Pakuranga Ward	8	Manukau City	02	Auckland Region	2.6792e+06	6.47556e+06	1	681700	3	930	65	1
1599700	15	552100	Fitzroy	3301	New Plymouth City Ward	33	New Plymouth District	07	Taranaki Region	2.60561e+06	6.23877e+06	1	1599700	5	955	5	2
550300	189	518202	Mt Eden East	703	Eden-Albert Ward	7	Auckland City	02	Auckland Region	2.66705e+06	6.47837e+06	1	550300	4	947	66	2
551000	153	518202	Mt Eden East	703	Eden-Albert Ward	7	Auckland City	02	Auckland Region	2.66725e+06	6.47808e+06	1	551000	5	971	54	2
551100	210	518202	Mt Eden East	703	Eden-Albert Ward	7	Auckland City	02	Auckland Region	2.66703e+06	6.47796e+06	1	551100	2	916	69	1
2648000	3	591500	Cathedral Square	6005	Hagley-Ferrymead Ward	60	Christchurch City	13	Canterbury Region	2.47978e+06	5.74086e+06	1	2648000	9	1108	1	3
681309	324	522722	Aberfeldy	806	Howick Ward	8	Manukau City	02	Auckland Region	2.68067e+06	6.4762e+06	1	681309	8	1032	146	3
681400	108	522723	Elsmore Park	803	Pakuranga Ward	8	Manukau City	02	Auckland Region	2.67938e+06	6.47555e+06	1	681400	3	927	36	1
288600	90	512100	Green Bay	604	New Lynn Ward	6	Waitakere City	02	Auckland Region	2.66018e+06	6.47365e+06	1	288600	3	934	30	1
549802	81	518202	Mt Eden East	703	Eden-Albert Ward	7	Auckland City	02	Auckland Region	2.66733e+06	6.47849e+06	1	549802	2	916	27	1
681323	54	522722	Aberfeldy	806	Howick Ward	8	Manukau City	02	Auckland Region	2.68049e+06	6.47482e+06	1	681323	3	930	18	1
419200	78	515500	Arch Hill	701	Western Bays Ward	7	Auckland City	02	Auckland Region	2.66594e+06	6.48021e+06	1	419200	5	954	27	2
681319	255	522722	Aberfeldy	806	Howick Ward	8	Manukau City	02	Auckland Region	2.68036e+06	6.47575e+06	1	681319	5	963	89	2
681331	57	522722	Aberfeldy	806	Howick Ward	8	Manukau City	02	Auckland Region	2.68016e+06	6.47494e+06	1	681331	3	930	19	1
2517200	144	589000	Wairarapa	6002	Fendalton-Waimairi Ward	60	Christchurch City	13	Canterbury Region	2.47599e+06	5.74478e+06	1	2517200	9	1123	65	3
1598501	87	552100	Fitzroy	3301	New Plymouth City Ward	33	New Plymouth District	07	Taranaki Region	2.60543e+06	6.23836e+06	1	1598501	4	944	30	2
681312	135	522722	Aberfeldy	806	Howick Ward	8	Manukau City	02	Auckland Region	2.68108e+06	6.47592e+06	1	681312	3	927	45	1
288800	105	512100	Green Bay	604	New Lynn Ward	6	Waitakere City	02	Auckland Region	2.66014e+06	6.47313e+06	1	288800	5	963	37	2
550600	120	518202	Mt Eden East	703	Eden-Albert Ward	7	Auckland City	02	Auckland Region	2.66712e+06	6.47821e+06	1	550600	5	955	42	2
550500	129	518202	Mt Eden East	703	Eden-Albert Ward	7	Auckland City	02	Auckland Region	2.66753e+06	6.47823e+06	1	550500	1	893	43	1
288402	66	512100	Green Bay	604	New Lynn Ward	6	Waitakere City	02	Auckland Region	2.66004e+06	6.4735e+06	1	288402	6	978	23	2
550100	165	518202	Mt Eden East	703	Eden-Albert Ward	7	Auckland City	02	Auckland Region	2.66727e+06	6.47841e+06	1	550100	5	964	58	2
2123700	66	573000	Lambton	4703	Lambton Ward	47	Wellington City	09	Wellington Region	2.65874e+06	5.99042e+06	1	2123700	5	970	23	2
2123600	69	572900	Thorndon-Tinakori Road	4703	Lambton Ward	47	Wellington City	09	Wellington Region	2.65803e+06	5.99045e+06	1	2123600	4	949	24	2
1598300	93	552100	Fitzroy	3301	New Plymouth City Ward	33	New Plymouth District	07	Taranaki Region	2.60534e+06	6.23832e+06	1	1598300	6	984	33	2
418900	69	515500	Arch Hill	701	Western Bays Ward	7	Auckland City	02	Auckland Region	2.66582e+06	6.48015e+06	1	418900	9	1080	31	3
681321	120	522722	Aberfeldy	806	Howick Ward	8	Manukau City	02	Auckland Region	2.68012e+06	6.47559e+06	1	681321	5	965	42	2
681900	186	522723	Elsmore Park	803	Pakuranga Ward	8	Manukau City	02	Auckland Region	2.67907e+06	6.47542e+06	1	681900	7	1013	65	2
2515900	72	589100	Jellie Park	6002	Fendalton-Waimairi Ward	60	Christchurch City	13	Canterbury Region	2.47663e+06	5.74475e+06	1	2515900	10	1145	32	3
2515800	219	589100	Jellie Park	6002	Fendalton-Waimairi Ward	60	Christchurch City	13	Canterbury Region	2.47656e+06	5.74467e+06	1	2515800	10	1193	99	3
549801	54	518202	Mt Eden East	703	Eden-Albert Ward	7	Auckland City	02	Auckland Region	2.66719e+06	6.47862e+06	1	549801	2	916	18	1
550900	126	518202	Mt Eden East	703	Eden-Albert Ward	7	Auckland City	02	Auckland Region	2.66703e+06	6.47815e+06	1	550900	2	917	42	1
681325	147	522722	Aberfeldy	806	Howick Ward	8	Manukau City	02	Auckland Region	2.6804e+06	6.47606e+06	1	681325	7	1024	51	2
681335	108	522722	Aberfeldy	806	Howick Ward	8	Manukau City	02	Auckland Region	2.68014e+06	6.47519e+06	1	681335	4	940	38	2
681333	75	522722	Aberfeldy	806	Howick Ward	8	Manukau City	02	Auckland Region	2.68031e+06	6.47498e+06	1	681333	5	967	26	2
2516200	204	589100	Jellie Park	6002	Fendalton-Waimairi Ward	60	Christchurch City	13	Canterbury Region	2.4764e+06	5.74484e+06	1	2516200	10	1157	92	3
2517100	162	589000	Wairarapa	6002	Fendalton-Waimairi Ward	60	Christchurch City	13	Canterbury Region	2.47635e+06	5.74503e+06	1	2517100	5	967	57	2
2516800	147	589000	Wairarapa	6002	Fendalton-Waimairi Ward	60	Christchurch City	13	Canterbury Region	2.47607e+06	5.74513e+06	1	2516800	2	907	49	1
2123000	105	572900	Thorndon-Tinakori Road	4703	Lambton Ward	47	Wellington City	09	Wellington Region	2.65847e+06	5.99089e+06	1	2123000	3	926	35	1
1599600	171	552100	Fitzroy	3301	New Plymouth City Ward	33	New Plymouth District	07	Taranaki Region	2.60541e+06	6.2388e+06	1	1599600	10	1216	77	3
419800	60	515600	Eden Terrace	704	Hobson Ward	7	Auckland City	02	Auckland Region	2.66687e+06	6.48018e+06	1	419800	6	987	21	2
681330	225	522722	Aberfeldy	806	Howick Ward	8	Manukau City	02	Auckland Region	2.68058e+06	6.47575e+06	1	681330	5	962	79	2
681336	45	522722	Aberfeldy	806	Howick Ward	8	Manukau City	02	Auckland Region	2.68021e+06	6.47525e+06	1	681336	4	940	16	2
418700	114	515500	Arch Hill	701	Western Bays Ward	7	Auckland City	02	Auckland Region	2.66638e+06	6.48046e+06	1	418700	4	951	40	2
418800	87	515500	Arch Hill	701	Western Bays Ward	7	Auckland City	02	Auckland Region	2.66564e+06	6.48018e+06	1	418800	9	1080	39	3
550700	105	518202	Mt Eden East	703	Eden-Albert Ward	7	Auckland City	02	Auckland Region	2.66749e+06	6.4781e+06	1	550700	1	881	35	1
288500	75	512100	Green Bay	604	New Lynn Ward	6	Waitakere City	02	Auckland Region	2.66013e+06	6.47357e+06	1	288500	6	978	26	2
681327	231	522722	Aberfeldy	806	Howick Ward	8	Manukau City	02	Auckland Region	2.68048e+06	6.47522e+06	1	681327	4	936	81	2
288900	132	512100	Green Bay	604	New Lynn Ward	6	Waitakere City	02	Auckland Region	2.6604e+06	6.47323e+06	1	288900	4	953	46	2
1468500	120	545762	Longlands South	3003	Heretaunga Ward	30	Hastings District	06	Hawke's Bay Region	2.84073e+06	6.16483e+06	1	1468500	4	939	42	2
2516000	135	589100	Jellie Park	6002	Fendalton-Waimairi Ward	60	Christchurch City	13	Canterbury Region	2.47638e+06	5.74457e+06	1	2516000	10	1145	61	3
2517000	99	589000	Wairarapa	6002	Fendalton-Waimairi Ward	60	Christchurch City	13	Canterbury Region	2.47628e+06	5.74509e+06	1	2517000	3	929	33	1
2123300	87	572900	Thorndon-Tinakori Road	4703	Lambton Ward	47	Wellington City	09	Wellington Region	2.6582e+06	5.99057e+06	1	2123300	5	967	30	2
419500	147	515600	Eden Terrace	703	Eden-Albert Ward	7	Auckland City	02	Auckland Region	2.6666e+06	6.48021e+06	1	419500	7	1007	51	2
1598401	30	552100	Fitzroy	3301	New Plymouth City Ward	33	New Plymouth District	07	Taranaki Region	2.6055e+06	6.23851e+06	1	1598401	4	944	10	2
550000	99	518202	Mt Eden East	703	Eden-Albert Ward	7	Auckland City	02	Auckland Region	2.66756e+06	6.47857e+06	1	550000	6	984	35	2
2909000	69	604020	Roslyn South	7104	Hills Ward	71	Dunedin City	14	Otago Region	2.31419e+06	5.47882e+06	1	2909000	1	884	23	1
419100	18	515500	Arch Hill	701	Western Bays Ward	7	Auckland City	02	Auckland Region	2.66592e+06	6.48006e+06	1	419100	3	918	6	1
681310	147	522722	Aberfeldy	806	Howick Ward	8	Manukau City	02	Auckland Region	2.68093e+06	6.47618e+06	1	681310	8	1033	66	3
2648200	3	591500	Cathedral Square	6005	Hagley-Ferrymead Ward	60	Christchurch City	13	Canterbury Region	2.48004e+06	5.74132e+06	1	2648200	9	1108	1	3
288700	72	512100	Green Bay	604	New Lynn Ward	6	Waitakere City	02	Auckland Region	2.66011e+06	6.47334e+06	1	288700	3	934	24	1
2123500	99	572900	Thorndon-Tinakori Road	4703	Lambton Ward	47	Wellington City	09	Wellington Region	2.65809e+06	5.99046e+06	1	2123500	4	936	35	2
681500	243	522723	Elsmore Park	803	Pakuranga Ward	8	Manukau City	02	Auckland Region	2.67978e+06	6.47491e+06	1	681500	5	954	85	2
549900	81	518202	Mt Eden East	703	Eden-Albert Ward	7	Auckland City	02	Auckland Region	2.66738e+06	6.47858e+06	1	549900	4	937	28	2
550200	150	518202	Mt Eden East	703	Eden-Albert Ward	7	Auckland City	02	Auckland Region	2.66755e+06	6.47843e+06	1	550200	2	910	50	1
2781700	96	598800	Waimataitai	6404	Timaru Ward	64	Timaru District	13	Canterbury Region	2.36982e+06	5.64593e+06	1	2781700	5	968	34	2
2126400	333	573000	Lambton	4703	Lambton Ward	47	Wellington City	09	Wellington Region	2.65856e+06	5.98981e+06	1	2126400	7	1012	117	2
685300	105	522910	Pakuranga Central	803	Pakuranga Ward	8	Manukau City	02	Auckland Region	2.67786e+06	6.4748e+06	1	685300	3	924	35	1
685500	69	522910	Pakuranga Central	803	Pakuranga Ward	8	Manukau City	02	Auckland Region	2.6782e+06	6.47519e+06	1	685500	4	952	24	2
290702	156	512100	Green Bay	604	New Lynn Ward	6	Waitakere City	02	Auckland Region	2.65925e+06	6.47289e+06	1	290702	3	928	51	1
2651000	12	591500	Cathedral Square	6005	Hagley-Ferrymead Ward	60	Christchurch City	13	Canterbury Region	2.48051e+06	5.74172e+06	1	2651000	9	1077	5	3
684800	123	522920	Edgewater	803	Pakuranga Ward	8	Manukau City	02	Auckland Region	2.67715e+06	6.4744e+06	1	684800	7	1008	43	2
1468903	18	545842	Bridge Pa	3003	Heretaunga Ward	30	Hastings District	06	Hawke's Bay Region	2.83617e+06	6.1657e+06	1	1468903	4	938	6	2
1470205	6	545842	Bridge Pa	3003	Heretaunga Ward	30	Hastings District	06	Hawke's Bay Region	2.83606e+06	6.16591e+06	1	1470205	4	937	2	2
2126700	147	573000	Lambton	4703	Lambton Ward	47	Wellington City	09	Wellington Region	2.65848e+06	5.98961e+06	1	2126700	6	978	51	2
2126500	162	573000	Lambton	4703	Lambton Ward	47	Wellington City	09	Wellington Region	2.65858e+06	5.98974e+06	1	2126500	9	1121	73	3
683500	207	522920	Edgewater	803	Pakuranga Ward	8	Manukau City	02	Auckland Region	2.67678e+06	6.47472e+06	1	683500	7	1001	72	2
2124800	237	573000	Lambton	4703	Lambton Ward	47	Wellington City	09	Wellington Region	2.65858e+06	5.98998e+06	1	2124800	9	1126	107	3
2125600	33	573000	Lambton	4703	Lambton Ward	47	Wellington City	09	Wellington Region	2.65879e+06	5.99002e+06	1	2125600	8	1047	15	3
421100	9	515600	Eden Terrace	704	Hobson Ward	7	Auckland City	02	Auckland Region	2.66727e+06	6.48013e+06	1	421100	7	1029	3	2
421000	84	515600	Eden Terrace	704	Hobson Ward	7	Auckland City	02	Auckland Region	2.66718e+06	6.48019e+06	1	421000	7	1006	29	2
2517500	126	589000	Wairarapa	6002	Fendalton-Waimairi Ward	60	Christchurch City	13	Canterbury Region	2.47589e+06	5.74487e+06	1	2517500	9	1090	57	3
1600500	60	552100	Fitzroy	3301	New Plymouth City Ward	33	New Plymouth District	07	Taranaki Region	2.60584e+06	6.23896e+06	1	1600500	6	988	21	2
2780300	150	599000	Maori Park	6404	Timaru Ward	64	Timaru District	13	Canterbury Region	2.36958e+06	5.6452e+06	1	2780300	6	982	52	2
2056612	12	571500	Papakowhai	4403	Eastern Ward	44	Porirua City	09	Wellington Region	2.66683e+06	6.00738e+06	1	2056612	6	980	4	2
683800	96	522920	Edgewater	803	Pakuranga Ward	8	Manukau City	02	Auckland Region	2.67701e+06	6.47444e+06	1	683800	8	1058	43	3
551402	18	518202	Mt Eden East	703	Eden-Albert Ward	7	Auckland City	02	Auckland Region	2.66753e+06	6.47783e+06	1	551402	4	945	6	2
551300	81	518202	Mt Eden East	703	Eden-Albert Ward	7	Auckland City	02	Auckland Region	2.66745e+06	6.47793e+06	1	551300	4	945	28	2
683100	81	522920	Edgewater	803	Pakuranga Ward	8	Manukau City	02	Auckland Region	2.6762e+06	6.47473e+06	1	683100	2	917	27	1
2780500	144	599000	Maori Park	6404	Timaru Ward	64	Timaru District	13	Canterbury Region	2.37005e+06	5.64517e+06	1	2780500	8	1071	65	3
2781000	117	598800	Waimataitai	6404	Timaru Ward	64	Timaru District	13	Canterbury Region	2.36975e+06	5.64657e+06	1	2781000	7	1015	41	2
290200	171	512100	Green Bay	604	New Lynn Ward	6	Waitakere City	02	Auckland Region	2.65991e+06	6.47349e+06	1	290200	4	940	60	2
290500	135	512100	Green Bay	604	New Lynn Ward	6	Waitakere City	02	Auckland Region	2.65983e+06	6.47296e+06	1	290500	2	907	45	1
290300	60	512100	Green Bay	604	New Lynn Ward	6	Waitakere City	02	Auckland Region	2.65993e+06	6.47315e+06	1	290300	4	938	21	2
289902	39	512100	Green Bay	604	New Lynn Ward	6	Waitakere City	02	Auckland Region	2.65956e+06	6.47331e+06	1	289902	6	993	14	2
1469902	99	547900	Raureka	3005	Hastings Ward	30	Hastings District	06	Hawke's Bay Region	2.83783e+06	6.16732e+06	1	1469902	1	889	33	1
1469903	48	545761	Irongate	3003	Heretaunga Ward	30	Hastings District	06	Hawke's Bay Region	2.83689e+06	6.16767e+06	1	1469903	4	951	17	2
2125000	12	573000	Lambton	4703	Lambton Ward	47	Wellington City	09	Wellington Region	2.65889e+06	5.99023e+06	1	2125000	8	1047	5	3
2124500	123	573000	Lambton	4703	Lambton Ward	47	Wellington City	09	Wellington Region	2.65844e+06	5.99019e+06	1	2124500	5	970	43	2
2517300	141	589000	Wairarapa	6002	Fendalton-Waimairi Ward	60	Christchurch City	13	Canterbury Region	2.47614e+06	5.74477e+06	1	2517300	4	941	49	2
441504	3	514301	Grafton West	704	Hobson Ward	7	Auckland City	02	Auckland Region	2.66759e+06	6.48052e+06	1	441504	8	1066	1	3
551500	162	518202	Mt Eden East	703	Eden-Albert Ward	7	Auckland City	02	Auckland Region	2.66706e+06	6.47782e+06	1	551500	3	922	53	1
2648300	15	591500	Cathedral Square	6005	Hagley-Ferrymead Ward	60	Christchurch City	13	Canterbury Region	2.48026e+06	5.74132e+06	1	2648300	9	1108	7	3
420900	36	515600	Eden Terrace	704	Hobson Ward	7	Auckland City	02	Auckland Region	2.66695e+06	6.48026e+06	1	420900	7	1006	13	2
289800	147	512100	Green Bay	604	New Lynn Ward	6	Waitakere City	02	Auckland Region	2.65947e+06	6.47326e+06	1	289800	6	998	51	2
420600	33	515600	Eden Terrace	704	Hobson Ward	7	Auckland City	02	Auckland Region	2.66735e+06	6.48042e+06	1	420600	7	1029	12	2
683600	135	522920	Edgewater	803	Pakuranga Ward	8	Manukau City	02	Auckland Region	2.67665e+06	6.4744e+06	1	683600	8	1058	61	3
551700	192	518202	Mt Eden East	703	Eden-Albert Ward	7	Auckland City	02	Auckland Region	2.66742e+06	6.47767e+06	1	551700	3	931	63	1
683400	132	522920	Edgewater	803	Pakuranga Ward	8	Manukau City	02	Auckland Region	2.67674e+06	6.47487e+06	1	683400	7	1019	46	2
289700	93	512100	Green Bay	604	New Lynn Ward	6	Waitakere City	02	Auckland Region	2.65943e+06	6.47346e+06	1	289700	2	908	31	1
420300	39	515600	Eden Terrace	704	Hobson Ward	7	Auckland City	02	Auckland Region	2.66704e+06	6.48055e+06	1	420300	7	1030	14	2
682302	33	522723	Elsmore Park	803	Pakuranga Ward	8	Manukau City	02	Auckland Region	2.67941e+06	6.47519e+06	1	682302	5	967	12	2
421200	78	515600	Eden Terrace	704	Hobson Ward	7	Auckland City	02	Auckland Region	2.66737e+06	6.48022e+06	1	421200	7	1029	27	2
1469302	57	547900	Raureka	3005	Hastings Ward	30	Hastings District	06	Hawke's Bay Region	2.83867e+06	6.16563e+06	1	1469302	3	921	19	1
1470102	39	545761	Irongate	3003	Heretaunga Ward	30	Hastings District	06	Hawke's Bay Region	2.8368e+06	6.16707e+06	1	1470102	4	942	14	2
683000	213	522920	Edgewater	803	Pakuranga Ward	8	Manukau City	02	Auckland Region	2.67618e+06	6.47507e+06	1	683000	6	983	75	2
2124400	9	573000	Lambton	4703	Lambton Ward	47	Wellington City	09	Wellington Region	2.65868e+06	5.99001e+06	1	2124400	5	970	3	2
683300	264	522920	Edgewater	803	Pakuranga Ward	8	Manukau City	02	Auckland Region	2.67647e+06	6.47489e+06	1	683300	7	1027	92	2
289000	150	512100	Green Bay	604	New Lynn Ward	6	Waitakere City	02	Auckland Region	2.66059e+06	6.47324e+06	1	289000	8	1036	68	3
683700	54	522920	Edgewater	803	Pakuranga Ward	8	Manukau City	02	Auckland Region	2.67677e+06	6.47437e+06	1	683700	7	1019	19	2
551401	69	518202	Mt Eden East	703	Eden-Albert Ward	7	Auckland City	02	Auckland Region	2.66744e+06	6.4778e+06	1	551401	4	945	24	2
682301	201	522723	Elsmore Park	803	Pakuranga Ward	8	Manukau City	02	Auckland Region	2.67942e+06	6.4753e+06	1	682301	5	967	70	2
420800	390	515600	Eden Terrace	704	Hobson Ward	7	Auckland City	02	Auckland Region	2.66699e+06	6.48035e+06	1	420800	6	986	136	2
1469400	183	548300	Akina	3005	Hastings Ward	30	Hastings District	06	Hawke's Bay Region	2.83887e+06	6.16533e+06	1	1469400	6	977	64	2
2125500	21	573000	Lambton	4703	Lambton Ward	47	Wellington City	09	Wellington Region	2.65887e+06	5.98998e+06	1	2125500	8	1047	9	3
2124300	129	573000	Lambton	4703	Lambton Ward	47	Wellington City	09	Wellington Region	2.65899e+06	5.99e+06	1	2124300	4	943	45	2
1599800	60	552100	Fitzroy	3301	New Plymouth City Ward	33	New Plymouth District	07	Taranaki Region	2.60561e+06	6.23892e+06	1	1599800	7	1023	21	2
1469802	51	547900	Raureka	3005	Hastings Ward	30	Hastings District	06	Hawke's Bay Region	2.83808e+06	6.16745e+06	1	1469802	6	990	18	2
682200	126	522723	Elsmore Park	803	Pakuranga Ward	8	Manukau City	02	Auckland Region	2.67929e+06	6.4753e+06	1	682200	4	952	44	2
2124000	6	573000	Lambton	4703	Lambton Ward	47	Wellington City	09	Wellington Region	2.65871e+06	5.99022e+06	1	2124000	5	970	2	2
420500	207	515600	Eden Terrace	704	Hobson Ward	7	Auckland City	02	Auckland Region	2.66725e+06	6.48038e+06	1	420500	4	944	72	2
2780700	171	599000	Maori Park	6404	Timaru Ward	64	Timaru District	13	Canterbury Region	2.36968e+06	5.64498e+06	1	2780700	4	938	60	2
2780600	120	599000	Maori Park	6404	Timaru Ward	64	Timaru District	13	Canterbury Region	2.36999e+06	5.64507e+06	1	2780600	7	999	42	2
551600	198	518202	Mt Eden East	703	Eden-Albert Ward	7	Auckland City	02	Auckland Region	2.66701e+06	6.47772e+06	1	551600	7	1020	69	2
290100	117	512100	Green Bay	604	New Lynn Ward	6	Waitakere City	02	Auckland Region	2.65982e+06	6.47322e+06	1	290100	8	1033	53	3
420400	96	515600	Eden Terrace	704	Hobson Ward	7	Auckland City	02	Auckland Region	2.66712e+06	6.48049e+06	1	420400	7	1030	34	2
289500	96	512100	Green Bay	604	New Lynn Ward	6	Waitakere City	02	Auckland Region	2.65929e+06	6.47347e+06	1	289500	2	908	32	1
70204	330	503400	Maunu	205	Okara Ward	2	Whangarei District	01	Northland Region	2.62631e+06	6.60597e+06	1	70204	1	892	109	1
551200	123	518202	Mt Eden East	703	Eden-Albert Ward	7	Auckland City	02	Auckland Region	2.66725e+06	6.4779e+06	1	551200	5	971	43	2
294102	96	511901	Kaurilands	604	New Lynn Ward	6	Waitakere City	02	Auckland Region	2.65819e+06	6.4731e+06	1	294102	1	898	32	1
2128500	15	573000	Lambton	4703	Lambton Ward	47	Wellington City	09	Wellington Region	2.65857e+06	5.98926e+06	1	2128500	8	1068	7	3
818500	42	525910	Pukekohe North	1003	Pukekohe Ward	10	Franklin District	02	Auckland Region	2.67921e+06	6.44302e+06	1	818500	10	1150	19	3
818000	141	525910	Pukekohe North	1003	Pukekohe Ward	10	Franklin District	02	Auckland Region	2.67904e+06	6.44422e+06	1	818000	6	989	49	2
817500	153	525910	Pukekohe North	1003	Pukekohe Ward	10	Franklin District	02	Auckland Region	2.67889e+06	6.4441e+06	1	817500	8	1050	69	3
2521500	141	588700	Bishopdale	6002	Fendalton-Waimairi Ward	60	Christchurch City	13	Canterbury Region	2.47665e+06	5.74567e+06	1	2521500	3	931	47	1
685900	51	522910	Pakuranga Central	803	Pakuranga Ward	8	Manukau City	02	Auckland Region	2.67748e+06	6.47475e+06	1	685900	5	955	18	2
2652500	12	591500	Cathedral Square	6005	Hagley-Ferrymead Ward	60	Christchurch City	13	Canterbury Region	2.48078e+06	5.74195e+06	1	2652500	9	1078	5	3
293100	162	511902	Crum Park	604	New Lynn Ward	6	Waitakere City	02	Auckland Region	2.65879e+06	6.47313e+06	1	293100	3	920	53	1
686100	171	522910	Pakuranga Central	803	Pakuranga Ward	8	Manukau City	02	Auckland Region	2.67762e+06	6.47428e+06	1	686100	5	954	60	2
2128600	42	573000	Lambton	4703	Lambton Ward	47	Wellington City	09	Wellington Region	2.65844e+06	5.98924e+06	1	2128600	8	1068	19	3
2127700	57	573000	Lambton	4703	Lambton Ward	47	Wellington City	09	Wellington Region	2.65864e+06	5.98951e+06	1	2127700	9	1073	26	3
1472300	78	545721	Karamu	3003	Heretaunga Ward	30	Hastings District	06	Hawke's Bay Region	2.84222e+06	6.16778e+06	1	1472300	8	1041	35	3
817800	285	525910	Pukekohe North	1003	Pukekohe Ward	10	Franklin District	02	Auckland Region	2.6791e+06	6.44394e+06	1	817800	8	1040	128	3
684000	81	522910	Pakuranga Central	803	Pakuranga Ward	8	Manukau City	02	Auckland Region	2.67722e+06	6.47479e+06	1	684000	9	1112	36	3
291700	102	511902	Crum Park	604	New Lynn Ward	6	Waitakere City	02	Auckland Region	2.65899e+06	6.47327e+06	1	291700	4	942	36	2
685600	108	522910	Pakuranga Central	803	Pakuranga Ward	8	Manukau City	02	Auckland Region	2.67817e+06	6.475e+06	1	685600	4	951	38	2
2127200	90	573000	Lambton	4703	Lambton Ward	47	Wellington City	09	Wellington Region	2.65856e+06	5.98964e+06	1	2127200	6	993	31	2
2127000	39	573000	Lambton	4703	Lambton Ward	47	Wellington City	09	Wellington Region	2.65866e+06	5.98966e+06	1	2127000	8	1047	18	3
2781200	147	598800	Waimataitai	6404	Timaru Ward	64	Timaru District	13	Canterbury Region	2.36985e+06	5.64639e+06	1	2781200	7	1009	51	2
1970900	117	568601	Waterloo West	4604	Central Ward	46	Lower Hutt City	09	Wellington Region	2.67084e+06	5.99747e+06	1	1970900	1	879	39	1
685700	132	522910	Pakuranga Central	803	Pakuranga Ward	8	Manukau City	02	Auckland Region	2.67811e+06	6.47485e+06	1	685700	5	971	46	2
1471700	66	545721	Karamu	3003	Heretaunga Ward	30	Hastings District	06	Hawke's Bay Region	2.84215e+06	6.16813e+06	1	1471700	7	1023	23	2
2127300	6	573000	Lambton	4703	Lambton Ward	47	Wellington City	09	Wellington Region	2.65868e+06	5.98957e+06	1	2127300	8	1047	3	3
2126100	21	573000	Lambton	4703	Lambton Ward	47	Wellington City	09	Wellington Region	2.65848e+06	5.98991e+06	1	2126100	9	1121	9	3
684702	42	522920	Edgewater	803	Pakuranga Ward	8	Manukau City	02	Auckland Region	2.67698e+06	6.47433e+06	1	684702	7	1008	15	2
685100	162	522910	Pakuranga Central	803	Pakuranga Ward	8	Manukau City	02	Auckland Region	2.67753e+06	6.47482e+06	1	685100	5	954	57	2
2126200	9	573000	Lambton	4703	Lambton Ward	47	Wellington City	09	Wellington Region	2.65865e+06	5.98984e+06	1	2126200	8	1047	4	3
2125900	3	573000	Lambton	4703	Lambton Ward	47	Wellington City	09	Wellington Region	2.65886e+06	5.98974e+06	1	2125900	8	1047	1	3
2127400	3	573000	Lambton	4703	Lambton Ward	47	Wellington City	09	Wellington Region	2.65874e+06	5.9895e+06	1	2127400	8	1047	1	3
816501	312	525910	Pukekohe North	1003	Pukekohe Ward	10	Franklin District	02	Auckland Region	2.67975e+06	6.44428e+06	1	816501	3	929	103	1
2117800	39	572900	Thorndon-Tinakori Road	4703	Lambton Ward	47	Wellington City	09	Wellington Region	2.65912e+06	5.99148e+06	1	2117800	4	938	14	2
2190300	120	576002	Island Bay East	4705	Southern Ward	47	Wellington City	09	Wellington Region	2.6585e+06	5.98453e+06	1	2190300	4	944	42	2
291000	174	512100	Green Bay	604	New Lynn Ward	6	Waitakere City	02	Auckland Region	2.66037e+06	6.47304e+06	1	291000	4	948	61	2
2126600	54	573000	Lambton	4703	Lambton Ward	47	Wellington City	09	Wellington Region	2.65867e+06	5.98973e+06	1	2126600	8	1047	24	3
2126800	24	573000	Lambton	4703	Lambton Ward	47	Wellington City	09	Wellington Region	2.65839e+06	5.98978e+06	1	2126800	9	1121	11	3
685400	105	522910	Pakuranga Central	803	Pakuranga Ward	8	Manukau City	02	Auckland Region	2.67798e+06	6.47507e+06	1	685400	4	952	37	2
291600	129	511902	Crum Park	604	New Lynn Ward	6	Waitakere City	02	Auckland Region	2.65888e+06	6.47332e+06	1	291600	7	1014	45	2
2651200	3	591500	Cathedral Square	6005	Hagley-Ferrymead Ward	60	Christchurch City	13	Canterbury Region	2.48094e+06	5.74171e+06	1	2651200	7	1026	1	2
2651100	54	591500	Cathedral Square	6005	Hagley-Ferrymead Ward	60	Christchurch City	13	Canterbury Region	2.4808e+06	5.74169e+06	1	2651100	9	1077	24	3
2126900	108	573000	Lambton	4703	Lambton Ward	47	Wellington City	09	Wellington Region	2.65837e+06	5.98942e+06	1	2126900	7	1004	38	2
2125700	3	573000	Lambton	4703	Lambton Ward	47	Wellington City	09	Wellington Region	2.65875e+06	5.98991e+06	1	2125700	8	1047	1	3
290701	78	512100	Green Bay	604	New Lynn Ward	6	Waitakere City	02	Auckland Region	2.65916e+06	6.473e+06	1	290701	3	932	26	1
683900	165	522920	Edgewater	803	Pakuranga Ward	8	Manukau City	02	Auckland Region	2.67694e+06	6.4747e+06	1	683900	8	1053	74	3
1472000	66	545721	Karamu	3003	Heretaunga Ward	30	Hastings District	06	Hawke's Bay Region	2.84247e+06	6.16819e+06	1	1472000	5	971	23	2
2125800	27	573000	Lambton	4703	Lambton Ward	47	Wellington City	09	Wellington Region	2.6588e+06	5.98984e+06	1	2125800	8	1047	12	3
290703	153	512100	Green Bay	604	New Lynn Ward	6	Waitakere City	02	Auckland Region	2.65938e+06	6.4729e+06	1	290703	3	932	50	1
291800	81	511902	Crum Park	604	New Lynn Ward	6	Waitakere City	02	Auckland Region	2.65902e+06	6.47317e+06	1	291800	4	942	28	2
2781600	120	598800	Waimataitai	6404	Timaru Ward	64	Timaru District	13	Canterbury Region	2.37016e+06	5.64617e+06	1	2781600	5	964	42	2
2781300	129	598800	Waimataitai	6404	Timaru Ward	64	Timaru District	13	Canterbury Region	2.36997e+06	5.64625e+06	1	2781300	8	1054	58	3
2781100	93	598800	Waimataitai	6404	Timaru Ward	64	Timaru District	13	Canterbury Region	2.36968e+06	5.64637e+06	1	2781100	5	971	33	2
2781400	126	598800	Waimataitai	6404	Timaru Ward	64	Timaru District	13	Canterbury Region	2.36976e+06	5.64607e+06	1	2781400	8	1061	57	3
2651400	15	591500	Cathedral Square	6005	Hagley-Ferrymead Ward	60	Christchurch City	13	Canterbury Region	2.48075e+06	5.74158e+06	1	2651400	9	1077	7	3
2651300	3	591500	Cathedral Square	6005	Hagley-Ferrymead Ward	60	Christchurch City	13	Canterbury Region	2.48054e+06	5.74158e+06	1	2651300	7	1026	1	2
2651500	72	591500	Cathedral Square	6005	Hagley-Ferrymead Ward	60	Christchurch City	13	Canterbury Region	2.481e+06	5.7416e+06	1	2651500	8	1037	32	3
685200	162	522910	Pakuranga Central	803	Pakuranga Ward	8	Manukau City	02	Auckland Region	2.67776e+06	6.47489e+06	1	685200	4	946	57	2
684602	69	522920	Edgewater	803	Pakuranga Ward	8	Manukau City	02	Auckland Region	2.6771e+06	6.47427e+06	1	684602	8	1034	31	3
2785100	84	599100	Highfield	6404	Timaru Ward	64	Timaru District	13	Canterbury Region	2.36783e+06	5.64488e+06	1	2785100	6	989	29	2
556600	114	518301	Maungawhau	703	Eden-Albert Ward	7	Auckland City	02	Auckland Region	2.66713e+06	6.47752e+06	1	556600	4	936	40	2
688800	156	523000	Pakuranga East	803	Pakuranga Ward	8	Manukau City	02	Auckland Region	2.67853e+06	6.47457e+06	1	688800	6	991	55	2
820300	135	525910	Pukekohe North	1003	Pukekohe Ward	10	Franklin District	02	Auckland Region	2.6788e+06	6.44304e+06	1	820300	10	1253	61	3
2916500	144	604130	Kenmure	7104	Hills Ward	71	Dunedin City	14	Otago Region	2.31367e+06	5.47736e+06	1	2916500	4	942	50	2
2129900	36	573000	Lambton	4703	Lambton Ward	47	Wellington City	09	Wellington Region	2.65822e+06	5.98885e+06	1	2129900	6	998	13	2
2129400	69	573000	Lambton	4703	Lambton Ward	47	Wellington City	09	Wellington Region	2.65831e+06	5.98902e+06	1	2129400	5	969	24	2
2521600	99	588700	Bishopdale	6002	Fendalton-Waimairi Ward	60	Christchurch City	13	Canterbury Region	2.47678e+06	5.74572e+06	1	2521600	4	947	35	2
685800	126	522910	Pakuranga Central	803	Pakuranga Ward	8	Manukau City	02	Auckland Region	2.67802e+06	6.47471e+06	1	685800	3	920	42	1
2653400	12	591500	Cathedral Square	6005	Hagley-Ferrymead Ward	60	Christchurch City	13	Canterbury Region	2.48043e+06	5.74207e+06	1	2653400	9	1078	5	3
2653500	9	591500	Cathedral Square	6005	Hagley-Ferrymead Ward	60	Christchurch City	13	Canterbury Region	2.4808e+06	5.74221e+06	1	2653500	9	1078	4	3
1472900	39	545721	Karamu	3003	Heretaunga Ward	30	Hastings District	06	Hawke's Bay Region	2.84126e+06	6.16495e+06	1	1472900	4	940	14	2
2128100	6	573000	Lambton	4703	Lambton Ward	47	Wellington City	09	Wellington Region	2.65862e+06	5.98944e+06	1	2128100	8	1040	3	3
686300	174	522910	Pakuranga Central	803	Pakuranga Ward	8	Manukau City	02	Auckland Region	2.67775e+06	6.4746e+06	1	686300	6	992	61	2
686200	135	522910	Pakuranga Central	803	Pakuranga Ward	8	Manukau City	02	Auckland Region	2.67778e+06	6.47446e+06	1	686200	1	861	45	1
2652300	6	591500	Cathedral Square	6005	Hagley-Ferrymead Ward	60	Christchurch City	13	Canterbury Region	2.48098e+06	5.74205e+06	1	2652300	9	1078	3	3
2653100	66	591500	Cathedral Square	6005	Hagley-Ferrymead Ward	60	Christchurch City	13	Canterbury Region	2.48048e+06	5.74243e+06	1	2653100	8	1031	30	3
2653000	54	591500	Cathedral Square	6005	Hagley-Ferrymead Ward	60	Christchurch City	13	Canterbury Region	2.48027e+06	5.74244e+06	1	2653000	9	1078	24	3
818400	138	525910	Pukekohe North	1003	Pukekohe Ward	10	Franklin District	02	Auckland Region	2.67924e+06	6.44328e+06	1	818400	9	1130	62	3
2521700	81	588700	Bishopdale	6002	Fendalton-Waimairi Ward	60	Christchurch City	13	Canterbury Region	2.47651e+06	5.74564e+06	1	2521700	3	923	27	1
2521300	90	588700	Bishopdale	6002	Fendalton-Waimairi Ward	60	Christchurch City	13	Canterbury Region	2.47663e+06	5.74585e+06	1	2521300	5	955	31	2
686700	201	522910	Pakuranga Central	803	Pakuranga Ward	8	Manukau City	02	Auckland Region	2.6779e+06	6.47436e+06	1	686700	5	968	70	2
2129300	57	573000	Lambton	4703	Lambton Ward	47	Wellington City	09	Wellington Region	2.65824e+06	5.98905e+06	1	2129300	5	969	20	2
2128400	147	573000	Lambton	4703	Lambton Ward	47	Wellington City	09	Wellington Region	2.65859e+06	5.98932e+06	1	2128400	8	1068	66	3
2129200	66	573000	Lambton	4703	Lambton Ward	47	Wellington City	09	Wellington Region	2.65836e+06	5.9893e+06	1	2129200	7	1004	23	2
818600	27	525910	Pukekohe North	1003	Pukekohe Ward	10	Franklin District	02	Auckland Region	2.67938e+06	6.4431e+06	1	818600	2	915	9	1
817300	84	525910	Pukekohe North	1003	Pukekohe Ward	10	Franklin District	02	Auckland Region	2.67977e+06	6.44299e+06	1	817300	7	1019	29	2
2127600	105	573000	Lambton	4703	Lambton Ward	47	Wellington City	09	Wellington Region	2.65853e+06	5.98955e+06	1	2127600	9	1073	47	3
1473400	6	548400	Woolwich	3006	Flaxmere Ward	30	Hastings District	06	Hawke's Bay Region	2.83637e+06	6.16958e+06	1	1473400	6	990	2	2
2522200	96	588700	Bishopdale	6002	Fendalton-Waimairi Ward	60	Christchurch City	13	Canterbury Region	2.47667e+06	5.74618e+06	1	2522200	5	954	34	2
2522300	147	588700	Bishopdale	6002	Fendalton-Waimairi Ward	60	Christchurch City	13	Canterbury Region	2.47683e+06	5.74617e+06	1	2522300	5	956	51	2
2653200	21	591500	Cathedral Square	6005	Hagley-Ferrymead Ward	60	Christchurch City	13	Canterbury Region	2.48055e+06	5.74231e+06	1	2653200	9	1078	9	3
293002	117	511902	Crum Park	604	New Lynn Ward	6	Waitakere City	02	Auckland Region	2.6584e+06	6.47316e+06	1	293002	2	907	39	1
817200	240	525922	Bledisloe Park	1003	Pukekohe Ward	10	Franklin District	02	Auckland Region	2.67995e+06	6.44281e+06	1	817200	4	952	84	2
294101	81	511901	Kaurilands	604	New Lynn Ward	6	Waitakere City	02	Auckland Region	2.65802e+06	6.47307e+06	1	294101	1	898	27	1
2522500	126	588700	Bishopdale	6002	Fendalton-Waimairi Ward	60	Christchurch City	13	Canterbury Region	2.47695e+06	5.74603e+06	1	2522500	4	949	44	2
686000	189	522910	Pakuranga Central	803	Pakuranga Ward	8	Manukau City	02	Auckland Region	2.67748e+06	6.47425e+06	1	686000	7	1004	66	2
2128800	162	573000	Lambton	4703	Lambton Ward	47	Wellington City	09	Wellington Region	2.65834e+06	5.98923e+06	1	2128800	8	1068	73	3
2128000	105	573000	Lambton	4703	Lambton Ward	47	Wellington City	09	Wellington Region	2.65851e+06	5.9895e+06	1	2128000	8	1040	47	3
2129000	141	573000	Lambton	4703	Lambton Ward	47	Wellington City	09	Wellington Region	2.65848e+06	5.9892e+06	1	2129000	10	1500	63	3
2129100	6	573000	Lambton	4703	Lambton Ward	47	Wellington City	09	Wellington Region	2.65854e+06	5.9892e+06	1	2129100	7	1004	2	2
2127900	93	573000	Lambton	4703	Lambton Ward	47	Wellington City	09	Wellington Region	2.65849e+06	5.98944e+06	1	2127900	8	1040	42	3
817902	108	525910	Pukekohe North	1003	Pukekohe Ward	10	Franklin District	02	Auckland Region	2.67893e+06	6.44361e+06	1	817902	6	989	38	2
818100	198	525910	Pukekohe North	1003	Pukekohe Ward	10	Franklin District	02	Auckland Region	2.67928e+06	6.4436e+06	1	818100	5	961	69	2
818200	213	525910	Pukekohe North	1003	Pukekohe Ward	10	Franklin District	02	Auckland Region	2.67942e+06	6.44352e+06	1	818200	7	1022	75	2
1473500	3	548400	Woolwich	3006	Flaxmere Ward	30	Hastings District	06	Hawke's Bay Region	2.83722e+06	6.1691e+06	1	1473500	6	990	1	2
2522000	141	588700	Bishopdale	6002	Fendalton-Waimairi Ward	60	Christchurch City	13	Canterbury Region	2.47629e+06	5.74548e+06	1	2522000	5	964	49	2
2522400	90	588700	Bishopdale	6002	Fendalton-Waimairi Ward	60	Christchurch City	13	Canterbury Region	2.47677e+06	5.74599e+06	1	2522400	4	942	31	2
292900	63	511902	Crum Park	604	New Lynn Ward	6	Waitakere City	02	Auckland Region	2.65879e+06	6.47335e+06	1	292900	2	900	21	1
2128700	111	573000	Lambton	4703	Lambton Ward	47	Wellington City	09	Wellington Region	2.65841e+06	5.98918e+06	1	2128700	8	1068	50	3
2128200	153	573000	Lambton	4703	Lambton Ward	47	Wellington City	09	Wellington Region	2.65843e+06	5.98934e+06	1	2128200	5	967	54	2
818300	72	525910	Pukekohe North	1003	Pukekohe Ward	10	Franklin District	02	Auckland Region	2.67907e+06	6.44337e+06	1	818300	10	1150	32	3
2522100	126	588700	Bishopdale	6002	Fendalton-Waimairi Ward	60	Christchurch City	13	Canterbury Region	2.47651e+06	5.74537e+06	1	2522100	7	1022	44	2
2123100	99	572900	Thorndon-Tinakori Road	4703	Lambton Ward	47	Wellington City	09	Wellington Region	2.65839e+06	5.99078e+06	1	2123100	2	899	33	1
293302	45	512100	Green Bay	604	New Lynn Ward	6	Waitakere City	02	Auckland Region	2.65904e+06	6.4729e+06	1	293302	5	962	16	2
293301	135	511902	Crum Park	604	New Lynn Ward	6	Waitakere City	02	Auckland Region	2.65899e+06	6.47284e+06	1	293301	5	962	47	2
2652700	18	591500	Cathedral Square	6005	Hagley-Ferrymead Ward	60	Christchurch City	13	Canterbury Region	2.48051e+06	5.74184e+06	1	2652700	9	1078	8	3
2652800	54	591500	Cathedral Square	6005	Hagley-Ferrymead Ward	60	Christchurch City	13	Canterbury Region	2.48079e+06	5.74183e+06	1	2652800	9	1078	24	3
2653600	6	591500	Cathedral Square	6005	Hagley-Ferrymead Ward	60	Christchurch City	13	Canterbury Region	2.48073e+06	5.74206e+06	1	2653600	9	1078	3	3
2128300	24	573000	Lambton	4703	Lambton Ward	47	Wellington City	09	Wellington Region	2.6585e+06	5.98933e+06	1	2128300	8	1068	11	3
2128900	120	573000	Lambton	4703	Lambton Ward	47	Wellington City	09	Wellington Region	2.65829e+06	5.98929e+06	1	2128900	7	1025	42	2
817600	120	525910	Pukekohe North	1003	Pukekohe Ward	10	Franklin District	02	Auckland Region	2.6792e+06	6.44437e+06	1	817600	5	967	42	2
293200	57	511902	Crum Park	604	New Lynn Ward	6	Waitakere City	02	Auckland Region	2.65844e+06	6.47302e+06	1	293200	3	934	19	1
2786602	108	599100	Highfield	6404	Timaru Ward	64	Timaru District	13	Canterbury Region	2.36808e+06	5.64481e+06	1	2786602	2	904	36	1
2786601	42	599100	Highfield	6404	Timaru Ward	64	Timaru District	13	Canterbury Region	2.36824e+06	5.64484e+06	1	2786601	4	951	15	2
2656400	24	591700	Avon Loop	6005	Hagley-Ferrymead Ward	60	Christchurch City	13	Canterbury Region	2.48133e+06	5.74229e+06	1	2656400	6	998	8	2
2131600	270	573101	Willis Street-Cambridge Terrace	4703	Lambton Ward	47	Wellington City	09	Wellington Region	2.65849e+06	5.98891e+06	1	2131600	10	1255	122	3
2131500	201	573101	Willis Street-Cambridge Terrace	4703	Lambton Ward	47	Wellington City	09	Wellington Region	2.65867e+06	5.98895e+06	1	2131500	6	988	70	2
2131300	135	573101	Willis Street-Cambridge Terrace	4703	Lambton Ward	47	Wellington City	09	Wellington Region	2.65867e+06	5.98916e+06	1	2131300	8	1056	61	3
2131100	114	573101	Willis Street-Cambridge Terrace	4703	Lambton Ward	47	Wellington City	09	Wellington Region	2.65874e+06	5.98924e+06	1	2131100	10	1176	51	3
821500	135	525921	Pukekohe West	1003	Pukekohe Ward	10	Franklin District	02	Auckland Region	2.67885e+06	6.44288e+06	1	821500	10	1206	61	3
1476200	132	548620	Flaxmere East	3006	Flaxmere Ward	30	Hastings District	06	Hawke's Bay Region	2.83589e+06	6.16856e+06	1	1476200	10	1195	59	3
1476800	123	547800	Frimley	3005	Hastings Ward	30	Hastings District	06	Hawke's Bay Region	2.83825e+06	6.16858e+06	1	1476800	7	1015	43	2
2525600	186	588500	Kaimahi	6002	Fendalton-Waimairi Ward	60	Christchurch City	13	Canterbury Region	2.47707e+06	5.74653e+06	1	2525600	6	984	65	2
2525500	198	588500	Kaimahi	6002	Fendalton-Waimairi Ward	60	Christchurch City	13	Canterbury Region	2.47694e+06	5.74647e+06	1	2525500	6	985	69	2
2525203	189	588500	Kaimahi	6002	Fendalton-Waimairi Ward	60	Christchurch City	13	Canterbury Region	2.47707e+06	5.74702e+06	1	2525203	8	1049	85	3
355300	201	510401	Kauri Park	503	Harbour Ward	5	North Shore City	02	Auckland Region	2.66331e+06	6.48659e+06	1	355300	2	905	66	1
821700	129	525921	Pukekohe West	1003	Pukekohe Ward	10	Franklin District	02	Auckland Region	2.67875e+06	6.44258e+06	1	821700	7	1022	45	2
821001	192	525921	Pukekohe West	1003	Pukekohe Ward	10	Franklin District	02	Auckland Region	2.67831e+06	6.44255e+06	1	821001	9	1077	86	3
820703	186	525921	Pukekohe West	1003	Pukekohe Ward	10	Franklin District	02	Auckland Region	2.67808e+06	6.4426e+06	1	820703	6	981	65	2
820800	51	525921	Pukekohe West	1003	Pukekohe Ward	10	Franklin District	02	Auckland Region	2.67766e+06	6.44229e+06	1	820800	7	1009	18	2
689400	198	523000	Pakuranga East	803	Pakuranga Ward	8	Manukau City	02	Auckland Region	2.67891e+06	6.47431e+06	1	689400	7	1005	69	2
2786400	150	599100	Highfield	6404	Timaru Ward	64	Timaru District	13	Canterbury Region	2.36786e+06	5.64512e+06	1	2786400	5	962	52	2
2786200	63	599100	Highfield	6404	Timaru Ward	64	Timaru District	13	Canterbury Region	2.36795e+06	5.64522e+06	1	2786200	1	880	21	1
2786300	102	599100	Highfield	6404	Timaru Ward	64	Timaru District	13	Canterbury Region	2.36812e+06	5.6452e+06	1	2786300	1	896	34	1
2654100	174	591700	Avon Loop	6005	Hagley-Ferrymead Ward	60	Christchurch City	13	Canterbury Region	2.48029e+06	5.74255e+06	1	2654100	10	1209	78	3
2654200	123	591700	Avon Loop	6005	Hagley-Ferrymead Ward	60	Christchurch City	13	Canterbury Region	2.48047e+06	5.74256e+06	1	2654200	8	1059	55	3
2653700	6	591700	Avon Loop	6005	Hagley-Ferrymead Ward	60	Christchurch City	13	Canterbury Region	2.48009e+06	5.74272e+06	1	2653700	5	964	2	2
2653800	69	591700	Avon Loop	6005	Hagley-Ferrymead Ward	60	Christchurch City	13	Canterbury Region	2.48029e+06	5.74282e+06	1	2653800	5	964	24	2
2654300	60	591700	Avon Loop	6005	Hagley-Ferrymead Ward	60	Christchurch City	13	Canterbury Region	2.4805e+06	5.74284e+06	1	2654300	8	1043	27	3
2130300	108	573000	Lambton	4703	Lambton Ward	47	Wellington City	09	Wellington Region	2.65819e+06	5.98877e+06	1	2130300	7	1017	38	2
556500	162	518301	Maungawhau	703	Eden-Albert Ward	7	Auckland City	02	Auckland Region	2.66697e+06	6.47757e+06	1	556500	3	930	53	1
2917400	21	604130	Kenmure	7104	Hills Ward	71	Dunedin City	14	Otago Region	2.31357e+06	5.47803e+06	1	2917400	6	997	7	2
689200	99	523000	Pakuranga East	803	Pakuranga Ward	8	Manukau City	02	Auckland Region	2.67874e+06	6.4744e+06	1	689200	5	961	35	2
2654500	51	591700	Avon Loop	6005	Hagley-Ferrymead Ward	60	Christchurch City	13	Canterbury Region	2.48045e+06	5.74275e+06	1	2654500	9	1073	23	3
2654600	21	591700	Avon Loop	6005	Hagley-Ferrymead Ward	60	Christchurch City	13	Canterbury Region	2.48072e+06	5.74275e+06	1	2654600	9	1073	9	3
2130200	81	573000	Lambton	4703	Lambton Ward	47	Wellington City	09	Wellington Region	2.65829e+06	5.98872e+06	1	2130200	7	1018	28	2
2129500	96	573000	Lambton	4703	Lambton Ward	47	Wellington City	09	Wellington Region	2.65829e+06	5.98893e+06	1	2129500	5	967	34	2
2130400	201	573000	Lambton	4703	Lambton Ward	47	Wellington City	09	Wellington Region	2.65829e+06	5.98914e+06	1	2130400	10	1313	90	3
689000	141	523000	Pakuranga East	803	Pakuranga Ward	8	Manukau City	02	Auckland Region	2.67856e+06	6.47443e+06	1	689000	7	1010	49	2
689100	93	523000	Pakuranga East	803	Pakuranga Ward	8	Manukau City	02	Auckland Region	2.67854e+06	6.47423e+06	1	689100	5	962	33	2
1475702	147	548620	Flaxmere East	3006	Flaxmere Ward	30	Hastings District	06	Hawke's Bay Region	2.83574e+06	6.16801e+06	1	1475702	8	1037	66	3
818700	39	525910	Pukekohe North	1003	Pukekohe Ward	10	Franklin District	02	Auckland Region	2.67947e+06	6.44305e+06	1	818700	2	915	13	1
2917500	132	604130	Kenmure	7104	Hills Ward	71	Dunedin City	14	Otago Region	2.31374e+06	5.47773e+06	1	2917500	6	997	46	2
2785200	81	599100	Highfield	6404	Timaru Ward	64	Timaru District	13	Canterbury Region	2.36773e+06	5.64472e+06	1	2785200	3	934	27	1
2785300	90	599100	Highfield	6404	Timaru Ward	64	Timaru District	13	Canterbury Region	2.368e+06	5.64469e+06	1	2785300	6	989	31	2
2654000	105	591700	Avon Loop	6005	Hagley-Ferrymead Ward	60	Christchurch City	13	Canterbury Region	2.48026e+06	5.74266e+06	1	2654000	6	987	37	2
2654800	210	591700	Avon Loop	6005	Hagley-Ferrymead Ward	60	Christchurch City	13	Canterbury Region	2.4807e+06	5.74258e+06	1	2654800	5	968	74	2
688900	111	523000	Pakuranga East	803	Pakuranga Ward	8	Manukau City	02	Auckland Region	2.6784e+06	6.47435e+06	1	688900	3	924	37	1
818800	33	525910	Pukekohe North	1003	Pukekohe Ward	10	Franklin District	02	Auckland Region	2.67919e+06	6.44279e+06	1	818800	10	1206	15	3
819000	9	525910	Pukekohe North	1003	Pukekohe Ward	10	Franklin District	02	Auckland Region	2.67955e+06	6.44278e+06	1	819000	10	1206	4	3
557000	150	518301	Maungawhau	703	Eden-Albert Ward	7	Auckland City	02	Auckland Region	2.66733e+06	6.47749e+06	1	557000	4	943	52	2
2785902	129	599100	Highfield	6404	Timaru Ward	64	Timaru District	13	Canterbury Region	2.36771e+06	5.64518e+06	1	2785902	3	935	43	1
2654700	93	591700	Avon Loop	6005	Hagley-Ferrymead Ward	60	Christchurch City	13	Canterbury Region	2.48056e+06	5.74259e+06	1	2654700	7	1026	33	2
557100	123	518301	Maungawhau	703	Eden-Albert Ward	7	Auckland City	02	Auckland Region	2.66727e+06	6.47734e+06	1	557100	4	950	43	2
2130100	72	573000	Lambton	4703	Lambton Ward	47	Wellington City	09	Wellington Region	2.65834e+06	5.98881e+06	1	2130100	7	1002	25	2
2130000	72	573000	Lambton	4703	Lambton Ward	47	Wellington City	09	Wellington Region	2.65828e+06	5.98883e+06	1	2130000	7	1002	25	2
2129800	54	573000	Lambton	4703	Lambton Ward	47	Wellington City	09	Wellington Region	2.65819e+06	5.98899e+06	1	2129800	6	998	19	2
556900	267	518301	Maungawhau	703	Eden-Albert Ward	7	Auckland City	02	Auckland Region	2.667e+06	6.47738e+06	1	556900	5	958	93	2
558000	288	518302	Mt Eden South	703	Eden-Albert Ward	7	Auckland City	02	Auckland Region	2.66691e+06	6.47709e+06	1	558000	3	928	95	1
557800	201	518301	Maungawhau	703	Eden-Albert Ward	7	Auckland City	02	Auckland Region	2.66693e+06	6.47724e+06	1	557800	2	910	66	1
688000	165	523000	Pakuranga East	803	Pakuranga Ward	8	Manukau City	02	Auckland Region	2.67822e+06	6.47426e+06	1	688000	3	926	54	1
557401	135	518302	Mt Eden South	703	Eden-Albert Ward	7	Auckland City	02	Auckland Region	2.66723e+06	6.47711e+06	1	557401	2	903	45	1
557300	102	518301	Maungawhau	703	Eden-Albert Ward	7	Auckland City	02	Auckland Region	2.66729e+06	6.47719e+06	1	557300	1	859	34	1
688700	96	523000	Pakuranga East	803	Pakuranga Ward	8	Manukau City	02	Auckland Region	2.67826e+06	6.47466e+06	1	688700	3	923	32	1
2129700	183	573000	Lambton	4703	Lambton Ward	47	Wellington City	09	Wellington Region	2.65843e+06	5.98894e+06	1	2129700	6	988	64	2
2130800	42	573101	Willis Street-Cambridge Terrace	4703	Lambton Ward	47	Wellington City	09	Wellington Region	2.65871e+06	5.98939e+06	1	2130800	6	977	15	2
687900	174	523000	Pakuranga East	803	Pakuranga Ward	8	Manukau City	02	Auckland Region	2.67823e+06	6.47443e+06	1	687900	3	923	57	1
2523400	231	588700	Bishopdale	6002	Fendalton-Waimairi Ward	60	Christchurch City	13	Canterbury Region	2.47689e+06	5.74632e+06	1	2523400	5	971	81	2
2916800	108	604130	Kenmure	7104	Hills Ward	71	Dunedin City	14	Otago Region	2.31322e+06	5.47711e+06	1	2916800	2	901	36	1
2653900	102	591700	Avon Loop	6005	Hagley-Ferrymead Ward	60	Christchurch City	13	Canterbury Region	2.48026e+06	5.74275e+06	1	2653900	5	964	36	2
426100	342	515202	St Marys	701	Western Bays Ward	7	Auckland City	02	Auckland Region	2.66651e+06	6.48236e+06	1	426100	3	928	113	1
557200	108	518301	Maungawhau	703	Eden-Albert Ward	7	Auckland City	02	Auckland Region	2.66742e+06	6.47735e+06	1	557200	3	918	36	1
2130500	156	573000	Lambton	4703	Lambton Ward	47	Wellington City	09	Wellington Region	2.65833e+06	5.98912e+06	1	2130500	6	988	55	2
2130700	75	573000	Lambton	4703	Lambton Ward	47	Wellington City	09	Wellington Region	2.65849e+06	5.98911e+06	1	2130700	6	988	26	2
2131000	15	573101	Willis Street-Cambridge Terrace	4703	Lambton Ward	47	Wellington City	09	Wellington Region	2.65868e+06	5.98931e+06	1	2131000	10	1176	7	3
820200	150	525910	Pukekohe North	1003	Pukekohe Ward	10	Franklin District	02	Auckland Region	2.67883e+06	6.44324e+06	1	820200	10	1346	68	3
425900	63	515202	St Marys	701	Western Bays Ward	7	Auckland City	02	Auckland Region	2.66644e+06	6.48265e+06	1	425900	1	896	21	1
2788000	99	599100	Highfield	6404	Timaru Ward	64	Timaru District	13	Canterbury Region	2.36861e+06	5.64495e+06	1	2788000	2	901	33	1
2658200	3	594700	Addington	6006	Spreydon-Heathcote Ward	60	Christchurch City	13	Canterbury Region	2.47951e+06	5.74073e+06	1	2658200	7	1024	1	2
2134000	3	573101	Willis Street-Cambridge Terrace	4703	Lambton Ward	47	Wellington City	09	Wellington Region	2.65867e+06	5.9886e+06	1	2134000	7	1028	1	2
2134300	18	573101	Willis Street-Cambridge Terrace	4703	Lambton Ward	47	Wellington City	09	Wellington Region	2.65863e+06	5.98867e+06	1	2134300	7	1028	6	2
2133800	15	573101	Willis Street-Cambridge Terrace	4703	Lambton Ward	47	Wellington City	09	Wellington Region	2.65887e+06	5.98863e+06	1	2133800	7	1003	5	2
823402	447	525922	Bledisloe Park	1003	Pukekohe Ward	10	Franklin District	02	Auckland Region	2.67926e+06	6.44127e+06	1	823402	2	907	148	1
822406	129	525921	Pukekohe West	1003	Pukekohe Ward	10	Franklin District	02	Auckland Region	2.67875e+06	6.44159e+06	1	822406	5	973	45	2
822407	132	525921	Pukekohe West	1003	Pukekohe Ward	10	Franklin District	02	Auckland Region	2.67889e+06	6.44149e+06	1	822407	7	1010	46	2
822402	414	525921	Pukekohe West	1003	Pukekohe Ward	10	Franklin District	02	Auckland Region	2.67855e+06	6.44132e+06	1	822402	1	894	137	1
823401	195	525922	Bledisloe Park	1003	Pukekohe Ward	10	Franklin District	02	Auckland Region	2.67918e+06	6.44151e+06	1	823401	4	944	68	2
822408	96	525921	Pukekohe West	1003	Pukekohe Ward	10	Franklin District	02	Auckland Region	2.67874e+06	6.44138e+06	1	822408	5	973	34	2
1478800	84	548500	Camberley	3005	Hastings Ward	30	Hastings District	06	Hawke's Bay Region	2.8385e+06	6.16792e+06	1	1478800	8	1058	38	3
560100	246	518500	Three Kings	702	Avondale-Roskill Ward	7	Auckland City	02	Auckland Region	2.66569e+06	6.47673e+06	1	560100	7	1019	86	2
1478200	189	548500	Camberley	3005	Hastings Ward	30	Hastings District	06	Hawke's Bay Region	2.83731e+06	6.16856e+06	1	1478200	10	1337	85	3
1477600	72	547800	Frimley	3005	Hastings Ward	30	Hastings District	06	Hawke's Bay Region	2.83938e+06	6.16849e+06	1	1477600	8	1041	32	3
1478900	72	548500	Camberley	3005	Hastings Ward	30	Hastings District	06	Hawke's Bay Region	2.83747e+06	6.16862e+06	1	1478900	10	1365	32	3
1478400	60	548500	Camberley	3005	Hastings Ward	30	Hastings District	06	Hawke's Bay Region	2.83767e+06	6.16835e+06	1	1478400	9	1075	27	3
561400	102	518500	Three Kings	702	Avondale-Roskill Ward	7	Auckland City	02	Auckland Region	2.66593e+06	6.47665e+06	1	561400	4	947	36	2
560800	141	518500	Three Kings	702	Avondale-Roskill Ward	7	Auckland City	02	Auckland Region	2.66579e+06	6.47619e+06	1	560800	8	1049	63	3
2527401	144	588500	Kaimahi	6002	Fendalton-Waimairi Ward	60	Christchurch City	13	Canterbury Region	2.4761e+06	5.74759e+06	1	2527401	1	894	48	1
2525800	99	588500	Kaimahi	6002	Fendalton-Waimairi Ward	60	Christchurch City	13	Canterbury Region	2.47671e+06	5.74709e+06	1	2525800	4	948	35	2
2788300	114	599400	Fraser Park	6404	Timaru Ward	64	Timaru District	13	Canterbury Region	2.36886e+06	5.64473e+06	1	2788300	4	952	40	2
2788100	42	599400	Fraser Park	6404	Timaru Ward	64	Timaru District	13	Canterbury Region	2.36844e+06	5.6447e+06	1	2788100	2	914	14	1
2657100	18	591700	Avon Loop	6005	Hagley-Ferrymead Ward	60	Christchurch City	13	Canterbury Region	2.48125e+06	5.742e+06	1	2657100	8	1036	8	3
2657200	150	591700	Avon Loop	6005	Hagley-Ferrymead Ward	60	Christchurch City	13	Canterbury Region	2.48161e+06	5.74198e+06	1	2657200	9	1102	68	3
2133600	129	573101	Willis Street-Cambridge Terrace	4703	Lambton Ward	47	Wellington City	09	Wellington Region	2.65871e+06	5.98876e+06	1	2133600	6	995	45	2
691200	228	522810	Pakuranga North	803	Pakuranga Ward	8	Manukau City	02	Auckland Region	2.6787e+06	6.47568e+06	1	691200	5	964	80	2
2525210	159	588500	Kaimahi	6002	Fendalton-Waimairi Ward	60	Christchurch City	13	Canterbury Region	2.47727e+06	5.74701e+06	1	2525210	8	1044	72	3
2918200	105	604130	Kenmure	7104	Hills Ward	71	Dunedin City	14	Otago Region	2.31342e+06	5.47727e+06	1	2918200	2	918	35	1
2787100	147	599100	Highfield	6404	Timaru Ward	64	Timaru District	13	Canterbury Region	2.36889e+06	5.64528e+06	1	2787100	7	1006	51	2
246108	165	512202	Durham Green	603	Henderson Ward	6	Waitakere City	02	Auckland Region	2.65838e+06	6.48404e+06	1	246108	8	1049	74	3
690000	174	523000	Pakuranga East	803	Pakuranga Ward	8	Manukau City	02	Auckland Region	2.67856e+06	6.47479e+06	1	690000	1	888	57	1
2656100	27	591700	Avon Loop	6005	Hagley-Ferrymead Ward	60	Christchurch City	13	Canterbury Region	2.48096e+06	5.74221e+06	1	2656100	8	1031	12	3
2656600	24	591700	Avon Loop	6005	Hagley-Ferrymead Ward	60	Christchurch City	13	Canterbury Region	2.48128e+06	5.74219e+06	1	2656600	8	1057	11	3
2656700	249	591700	Avon Loop	6005	Hagley-Ferrymead Ward	60	Christchurch City	13	Canterbury Region	2.48153e+06	5.7422e+06	1	2656700	6	994	87	2
2132500	12	573101	Willis Street-Cambridge Terrace	4703	Lambton Ward	47	Wellington City	09	Wellington Region	2.65846e+06	5.98855e+06	1	2132500	8	1061	5	3
2525205	198	588500	Kaimahi	6002	Fendalton-Waimairi Ward	60	Christchurch City	13	Canterbury Region	2.47715e+06	5.74681e+06	1	2525205	6	989	69	2
690700	249	523000	Pakuranga East	803	Pakuranga Ward	8	Manukau City	02	Auckland Region	2.67853e+06	6.47537e+06	1	690700	6	988	87	2
2787600	12	599100	Highfield	6404	Timaru Ward	64	Timaru District	13	Canterbury Region	2.36864e+06	5.64521e+06	1	2787600	2	901	4	1
2787300	171	599100	Highfield	6404	Timaru Ward	64	Timaru District	13	Canterbury Region	2.36939e+06	5.64504e+06	1	2787300	5	958	60	2
2787500	183	599100	Highfield	6404	Timaru Ward	64	Timaru District	13	Canterbury Region	2.36841e+06	5.64521e+06	1	2787500	5	966	64	2
2787200	93	599100	Highfield	6404	Timaru Ward	64	Timaru District	13	Canterbury Region	2.36925e+06	5.64514e+06	1	2787200	3	930	31	1
2787400	135	599100	Highfield	6404	Timaru Ward	64	Timaru District	13	Canterbury Region	2.36917e+06	5.645e+06	1	2787400	4	941	47	2
690300	225	523000	Pakuranga East	803	Pakuranga Ward	8	Manukau City	02	Auckland Region	2.67889e+06	6.47483e+06	1	690300	6	997	79	2
2132000	30	573101	Willis Street-Cambridge Terrace	4703	Lambton Ward	47	Wellington City	09	Wellington Region	2.65847e+06	5.98873e+06	1	2132000	5	959	10	2
2132100	63	573101	Willis Street-Cambridge Terrace	4703	Lambton Ward	47	Wellington City	09	Wellington Region	2.65856e+06	5.98871e+06	1	2132100	5	959	22	2
689700	177	523000	Pakuranga East	803	Pakuranga Ward	8	Manukau City	02	Auckland Region	2.67831e+06	6.475e+06	1	689700	5	967	62	2
821200	81	525921	Pukekohe West	1003	Pukekohe Ward	10	Franklin District	02	Auckland Region	2.67795e+06	6.44202e+06	1	821200	7	1009	28	2
1475800	255	548620	Flaxmere East	3006	Flaxmere Ward	30	Hastings District	06	Hawke's Bay Region	2.83592e+06	6.16797e+06	1	1475800	7	1000	89	2
1476100	102	548620	Flaxmere East	3006	Flaxmere Ward	30	Hastings District	06	Hawke's Bay Region	2.83572e+06	6.16877e+06	1	1476100	8	1049	46	3
689500	99	523000	Pakuranga East	803	Pakuranga Ward	8	Manukau City	02	Auckland Region	2.679e+06	6.47441e+06	1	689500	6	983	35	2
2525207	36	588500	Kaimahi	6002	Fendalton-Waimairi Ward	60	Christchurch City	13	Canterbury Region	2.47738e+06	5.74672e+06	1	2525207	6	989	13	2
2656800	75	591700	Avon Loop	6005	Hagley-Ferrymead Ward	60	Christchurch City	13	Canterbury Region	2.48126e+06	5.74208e+06	1	2656800	8	1036	34	3
690100	201	523000	Pakuranga East	803	Pakuranga Ward	8	Manukau City	02	Auckland Region	2.67843e+06	6.47471e+06	1	690100	5	962	70	2
2131400	138	573101	Willis Street-Cambridge Terrace	4703	Lambton Ward	47	Wellington City	09	Wellington Region	2.65857e+06	5.98907e+06	1	2131400	7	1003	48	2
821302	183	525921	Pukekohe West	1003	Pukekohe Ward	10	Franklin District	02	Auckland Region	2.67859e+06	6.44186e+06	1	821302	6	994	64	2
821303	42	525921	Pukekohe West	1003	Pukekohe Ward	10	Franklin District	02	Auckland Region	2.67883e+06	6.44187e+06	1	821303	3	923	14	1
821301	99	525921	Pukekohe West	1003	Pukekohe Ward	10	Franklin District	02	Auckland Region	2.67836e+06	6.44191e+06	1	821301	3	923	33	1
2131200	177	573101	Willis Street-Cambridge Terrace	4703	Lambton Ward	47	Wellington City	09	Wellington Region	2.65879e+06	5.98924e+06	1	2131200	6	977	62	2
821400	48	525921	Pukekohe West	1003	Pukekohe Ward	10	Franklin District	02	Auckland Region	2.67903e+06	6.443e+06	1	821400	10	1206	22	3
1476500	159	548620	Flaxmere East	3006	Flaxmere Ward	30	Hastings District	06	Hawke's Bay Region	2.8355e+06	6.1684e+06	1	1476500	8	1051	72	3
2525400	108	588500	Kaimahi	6002	Fendalton-Waimairi Ward	60	Christchurch City	13	Canterbury Region	2.47717e+06	5.74662e+06	1	2525400	5	958	38	2
2918100	84	604130	Kenmure	7104	Hills Ward	71	Dunedin City	14	Otago Region	2.31357e+06	5.47748e+06	1	2918100	5	961	29	2
2786700	96	599100	Highfield	6404	Timaru Ward	64	Timaru District	13	Canterbury Region	2.36842e+06	5.64479e+06	1	2786700	6	991	34	2
2655900	12	591700	Avon Loop	6005	Hagley-Ferrymead Ward	60	Christchurch City	13	Canterbury Region	2.48074e+06	5.74231e+06	1	2655900	8	1031	5	3
2656000	99	591700	Avon Loop	6005	Hagley-Ferrymead Ward	60	Christchurch City	13	Canterbury Region	2.48103e+06	5.74232e+06	1	2656000	8	1031	45	3
2131700	72	573101	Willis Street-Cambridge Terrace	4703	Lambton Ward	47	Wellington City	09	Wellington Region	2.65856e+06	5.98884e+06	1	2131700	9	1113	32	3
2132200	18	573101	Willis Street-Cambridge Terrace	4703	Lambton Ward	47	Wellington City	09	Wellington Region	2.65844e+06	5.98863e+06	1	2132200	8	1061	8	3
2131800	39	573101	Willis Street-Cambridge Terrace	4703	Lambton Ward	47	Wellington City	09	Wellington Region	2.65864e+06	5.98881e+06	1	2131800	9	1113	18	3
821600	123	525921	Pukekohe West	1003	Pukekohe Ward	10	Franklin District	02	Auckland Region	2.67897e+06	6.4426e+06	1	821600	8	1035	55	3
821800	237	525921	Pukekohe West	1003	Pukekohe Ward	10	Franklin District	02	Auckland Region	2.67864e+06	6.44272e+06	1	821800	8	1045	107	3
1477100	120	547800	Frimley	3005	Hastings Ward	30	Hastings District	06	Hawke's Bay Region	2.83835e+06	6.16846e+06	1	1477100	7	1005	42	2
1476400	171	548620	Flaxmere East	3006	Flaxmere Ward	30	Hastings District	06	Hawke's Bay Region	2.8358e+06	6.1684e+06	1	1476400	9	1091	77	3
1476300	120	548620	Flaxmere East	3006	Flaxmere Ward	30	Hastings District	06	Hawke's Bay Region	2.83583e+06	6.16847e+06	1	1476300	9	1072	54	3
2917800	51	604130	Kenmure	7104	Hills Ward	71	Dunedin City	14	Otago Region	2.31326e+06	5.4774e+06	1	2917800	5	961	18	2
2917600	105	604130	Kenmure	7104	Hills Ward	71	Dunedin City	14	Otago Region	2.3139e+06	5.47784e+06	1	2917600	2	917	35	1
2132300	27	573101	Willis Street-Cambridge Terrace	4703	Lambton Ward	47	Wellington City	09	Wellington Region	2.65855e+06	5.9886e+06	1	2132300	7	1028	9	2
2132400	9	573101	Willis Street-Cambridge Terrace	4703	Lambton Ward	47	Wellington City	09	Wellington Region	2.65836e+06	5.9886e+06	1	2132400	8	1061	4	3
821101	144	525921	Pukekohe West	1003	Pukekohe Ward	10	Franklin District	02	Auckland Region	2.67825e+06	6.44229e+06	1	821101	3	935	48	1
821002	180	525921	Pukekohe West	1003	Pukekohe Ward	10	Franklin District	02	Auckland Region	2.67816e+06	6.44239e+06	1	821002	4	952	63	2
2525209	129	588500	Kaimahi	6002	Fendalton-Waimairi Ward	60	Christchurch City	13	Canterbury Region	2.47746e+06	5.74691e+06	1	2525209	5	960	45	2
2917900	111	604130	Kenmure	7104	Hills Ward	71	Dunedin City	14	Otago Region	2.3132e+06	5.47726e+06	1	2917900	8	1042	50	3
2131900	33	573101	Willis Street-Cambridge Terrace	4703	Lambton Ward	47	Wellington City	09	Wellington Region	2.65839e+06	5.98872e+06	1	2131900	5	959	12	2
820900	126	525921	Pukekohe West	1003	Pukekohe Ward	10	Franklin District	02	Auckland Region	2.67787e+06	6.44224e+06	1	820900	3	935	42	1
821102	201	525921	Pukekohe West	1003	Pukekohe Ward	10	Franklin District	02	Auckland Region	2.6785e+06	6.44222e+06	1	821102	5	967	70	2
689800	159	523000	Pakuranga East	803	Pakuranga Ward	8	Manukau City	02	Auckland Region	2.67846e+06	6.47503e+06	1	689800	5	965	56	2
2525206	42	588500	Kaimahi	6002	Fendalton-Waimairi Ward	60	Christchurch City	13	Canterbury Region	2.47694e+06	5.74682e+06	1	2525206	6	989	15	2
2525208	18	588500	Kaimahi	6002	Fendalton-Waimairi Ward	60	Christchurch City	13	Canterbury Region	2.47739e+06	5.74682e+06	1	2525208	6	989	6	2
2525700	159	588500	Kaimahi	6002	Fendalton-Waimairi Ward	60	Christchurch City	13	Canterbury Region	2.47674e+06	5.74731e+06	1	2525700	5	970	56	2
2917700	156	604130	Kenmure	7104	Hills Ward	71	Dunedin City	14	Otago Region	2.31341e+06	5.47752e+06	1	2917700	3	923	51	1
2787700	216	599100	Highfield	6404	Timaru Ward	64	Timaru District	13	Canterbury Region	2.36835e+06	5.645e+06	1	2787700	2	910	71	1
2787800	3	599100	Highfield	6404	Timaru Ward	64	Timaru District	13	Canterbury Region	2.36861e+06	5.64507e+06	1	2787800	2	901	1	1
2786500	93	599100	Highfield	6404	Timaru Ward	64	Timaru District	13	Canterbury Region	2.36807e+06	5.645e+06	1	2786500	1	880	31	1
355200	285	510401	Kauri Park	503	Harbour Ward	5	North Shore City	02	Auckland Region	2.66354e+06	6.48661e+06	1	355200	4	946	100	2
690400	105	523000	Pakuranga East	803	Pakuranga Ward	8	Manukau City	02	Auckland Region	2.67878e+06	6.47468e+06	1	690400	4	940	37	2
689300	204	523000	Pakuranga East	803	Pakuranga Ward	8	Manukau City	02	Auckland Region	2.67875e+06	6.47422e+06	1	689300	5	961	71	2
690500	231	523000	Pakuranga East	803	Pakuranga Ward	8	Manukau City	02	Auckland Region	2.67896e+06	6.47459e+06	1	690500	6	995	81	2
820400	72	525910	Pukekohe North	1003	Pukekohe Ward	10	Franklin District	02	Auckland Region	2.67898e+06	6.44325e+06	1	820400	10	1253	32	3
1476000	156	548620	Flaxmere East	3006	Flaxmere Ward	30	Hastings District	06	Hawke's Bay Region	2.83562e+06	6.16874e+06	1	1476000	7	1021	55	2
1476700	126	547800	Frimley	3005	Hastings Ward	30	Hastings District	06	Hawke's Bay Region	2.838e+06	6.16872e+06	1	1476700	7	1021	44	2
2525300	57	588500	Kaimahi	6002	Fendalton-Waimairi Ward	60	Christchurch City	13	Canterbury Region	2.47688e+06	5.74671e+06	1	2525300	5	958	20	2
2790500	105	599400	Fraser Park	6404	Timaru Ward	64	Timaru District	13	Canterbury Region	2.36945e+06	5.64395e+06	1	2790500	6	982	37	2
2528501	72	588402	Sawyers Arms	6001	Shirley-Papanui Ward	60	Christchurch City	13	Canterbury Region	2.47619e+06	5.74926e+06	1	2528501	5	959	25	2
562500	42	518500	Three Kings	702	Avondale-Roskill Ward	7	Auckland City	02	Auckland Region	2.66642e+06	6.47614e+06	1	562500	9	1073	19	3
2135100	72	573101	Willis Street-Cambridge Terrace	4703	Lambton Ward	47	Wellington City	09	Wellington Region	2.65859e+06	5.98838e+06	1	2135100	9	1127	32	3
2135600	222	573101	Willis Street-Cambridge Terrace	4703	Lambton Ward	47	Wellington City	09	Wellington Region	2.65909e+06	5.98897e+06	1	2135600	7	1029	78	2
1479800	63	547900	Raureka	3005	Hastings Ward	30	Hastings District	06	Hawke's Bay Region	2.83792e+06	6.16719e+06	1	1479800	5	972	22	2
1480200	135	547900	Raureka	3005	Hastings Ward	30	Hastings District	06	Hawke's Bay Region	2.83831e+06	6.16718e+06	1	1480200	6	987	47	2
562300	183	518500	Three Kings	702	Avondale-Roskill Ward	7	Auckland City	02	Auckland Region	2.66655e+06	6.47624e+06	1	562300	10	1200	82	3
2528703	165	588402	Sawyers Arms	6001	Shirley-Papanui Ward	60	Christchurch City	13	Canterbury Region	2.477e+06	5.74758e+06	1	2528703	1	880	54	1
2790800	93	599500	Seaview	6404	Timaru Ward	64	Timaru District	13	Canterbury Region	2.36984e+06	5.64471e+06	1	2790800	7	1002	33	2
562900	126	518500	Three Kings	702	Avondale-Roskill Ward	7	Auckland City	02	Auckland Region	2.66637e+06	6.47587e+06	1	562900	9	1087	57	3
2135900	72	573101	Willis Street-Cambridge Terrace	4703	Lambton Ward	47	Wellington City	09	Wellington Region	2.65908e+06	5.98881e+06	1	2135900	5	964	25	2
1480100	150	547900	Raureka	3005	Hastings Ward	30	Hastings District	06	Hawke's Bay Region	2.83807e+06	6.167e+06	1	1480100	7	1026	52	2
2135400	27	573101	Willis Street-Cambridge Terrace	4703	Lambton Ward	47	Wellington City	09	Wellington Region	2.6593e+06	5.98901e+06	1	2135400	5	974	9	2
822500	159	525921	Pukekohe West	1003	Pukekohe Ward	10	Franklin District	02	Auckland Region	2.67852e+06	6.44085e+06	1	822500	2	904	52	1
822900	132	525922	Bledisloe Park	1003	Pukekohe Ward	10	Franklin District	02	Auckland Region	2.67903e+06	6.44095e+06	1	822900	5	966	46	2
2135200	3	573101	Willis Street-Cambridge Terrace	4703	Lambton Ward	47	Wellington City	09	Wellington Region	2.65916e+06	5.98909e+06	1	2135200	5	974	1	2
823100	57	525922	Bledisloe Park	1003	Pukekohe Ward	10	Franklin District	02	Auckland Region	2.67935e+06	6.44255e+06	1	823100	9	1111	26	3
823000	6	525922	Bledisloe Park	1003	Pukekohe Ward	10	Franklin District	02	Auckland Region	2.67919e+06	6.44264e+06	1	823000	9	1111	3	3
823200	72	525922	Bledisloe Park	1003	Pukekohe Ward	10	Franklin District	02	Auckland Region	2.67959e+06	6.44258e+06	1	823200	9	1111	32	3
1477400	102	547800	Frimley	3005	Hastings Ward	30	Hastings District	06	Hawke's Bay Region	2.83851e+06	6.16833e+06	1	1477400	4	938	36	2
1479000	102	548500	Camberley	3005	Hastings Ward	30	Hastings District	06	Hawke's Bay Region	2.8375e+06	6.16837e+06	1	1479000	10	1249	46	3
1478300	69	548500	Camberley	3005	Hastings Ward	30	Hastings District	06	Hawke's Bay Region	2.83749e+06	6.1685e+06	1	1478300	10	1476	31	3
560500	168	518500	Three Kings	702	Avondale-Roskill Ward	7	Auckland City	02	Auckland Region	2.66582e+06	6.47634e+06	1	560500	10	1162	76	3
2526900	135	588500	Kaimahi	6002	Fendalton-Waimairi Ward	60	Christchurch City	13	Canterbury Region	2.47646e+06	5.74698e+06	1	2526900	2	912	45	1
2528704	63	588402	Sawyers Arms	6001	Shirley-Papanui Ward	60	Christchurch City	13	Canterbury Region	2.47711e+06	5.74748e+06	1	2528704	1	880	21	1
2526300	168	588500	Kaimahi	6002	Fendalton-Waimairi Ward	60	Christchurch City	13	Canterbury Region	2.47637e+06	5.7474e+06	1	2526300	4	942	59	2
560300	198	518500	Three Kings	702	Avondale-Roskill Ward	7	Auckland City	02	Auckland Region	2.66537e+06	6.47643e+06	1	560300	6	979	69	2
2657900	174	591700	Avon Loop	6005	Hagley-Ferrymead Ward	60	Christchurch City	13	Canterbury Region	2.48158e+06	5.74167e+06	1	2657900	8	1046	78	3
2657300	15	591700	Avon Loop	6005	Hagley-Ferrymead Ward	60	Christchurch City	13	Canterbury Region	2.48126e+06	5.74192e+06	1	2657300	8	1036	7	3
560400	189	518500	Three Kings	702	Avondale-Roskill Ward	7	Auckland City	02	Auckland Region	2.66554e+06	6.47634e+06	1	560400	4	945	66	2
2133700	105	573101	Willis Street-Cambridge Terrace	4703	Lambton Ward	47	Wellington City	09	Wellington Region	2.6588e+06	5.98874e+06	1	2133700	7	1003	37	2
691100	240	522810	Pakuranga North	803	Pakuranga Ward	8	Manukau City	02	Auckland Region	2.67849e+06	6.47554e+06	1	691100	6	988	84	2
690800	96	523000	Pakuranga East	803	Pakuranga Ward	8	Manukau City	02	Auckland Region	2.67867e+06	6.47532e+06	1	690800	6	996	34	2
560200	126	518500	Three Kings	702	Avondale-Roskill Ward	7	Auckland City	02	Auckland Region	2.66562e+06	6.47652e+06	1	560200	6	998	44	2
560700	114	518500	Three Kings	702	Avondale-Roskill Ward	7	Auckland City	02	Auckland Region	2.66616e+06	6.4762e+06	1	560700	7	1029	40	2
2526000	72	588500	Kaimahi	6002	Fendalton-Waimairi Ward	60	Christchurch City	13	Canterbury Region	2.47664e+06	5.74688e+06	1	2526000	5	962	25	2
561300	54	518500	Three Kings	702	Avondale-Roskill Ward	7	Auckland City	02	Auckland Region	2.66623e+06	6.47664e+06	1	561300	6	974	19	2
560600	54	518500	Three Kings	702	Avondale-Roskill Ward	7	Auckland City	02	Auckland Region	2.66595e+06	6.47631e+06	1	560600	6	998	19	2
2658100	102	591700	Avon Loop	6005	Hagley-Ferrymead Ward	60	Christchurch City	13	Canterbury Region	2.48153e+06	5.7416e+06	1	2658100	8	1042	46	3
2132700	9	573101	Willis Street-Cambridge Terrace	4703	Lambton Ward	47	Wellington City	09	Wellington Region	2.65836e+06	5.98848e+06	1	2132700	8	1061	4	3
823600	15	525922	Bledisloe Park	1003	Pukekohe Ward	10	Franklin District	02	Auckland Region	2.67999e+06	6.44186e+06	1	823600	9	1111	7	3
822300	144	525921	Pukekohe West	1003	Pukekohe Ward	10	Franklin District	02	Auckland Region	2.67893e+06	6.44206e+06	1	822300	7	1018	50	2
1477800	90	547800	Frimley	3005	Hastings Ward	30	Hastings District	06	Hawke's Bay Region	2.83877e+06	6.16806e+06	1	1477800	8	1041	40	3
2526100	66	588500	Kaimahi	6002	Fendalton-Waimairi Ward	60	Christchurch City	13	Canterbury Region	2.47653e+06	5.74673e+06	1	2526100	4	948	23	2
2526600	123	588500	Kaimahi	6002	Fendalton-Waimairi Ward	60	Christchurch City	13	Canterbury Region	2.47649e+06	5.74721e+06	1	2526600	5	962	43	2
2525900	288	588500	Kaimahi	6002	Fendalton-Waimairi Ward	60	Christchurch City	13	Canterbury Region	2.47691e+06	5.74711e+06	1	2525900	3	932	95	1
2656900	132	591700	Avon Loop	6005	Hagley-Ferrymead Ward	60	Christchurch City	13	Canterbury Region	2.48146e+06	5.74208e+06	1	2656900	8	1057	59	3
2657000	102	591700	Avon Loop	6005	Hagley-Ferrymead Ward	60	Christchurch City	13	Canterbury Region	2.48167e+06	5.74208e+06	1	2657000	8	1072	46	3
2132800	39	573101	Willis Street-Cambridge Terrace	4703	Lambton Ward	47	Wellington City	09	Wellington Region	2.65845e+06	5.98843e+06	1	2132800	8	1061	18	3
823500	24	525922	Bledisloe Park	1003	Pukekohe Ward	10	Franklin District	02	Auckland Region	2.67971e+06	6.44154e+06	1	823500	9	1111	11	3
822401	318	525921	Pukekohe West	1003	Pukekohe Ward	10	Franklin District	02	Auckland Region	2.67809e+06	6.44154e+06	1	822401	3	928	105	1
1478500	90	548500	Camberley	3005	Hastings Ward	30	Hastings District	06	Hawke's Bay Region	2.83804e+06	6.16844e+06	1	1478500	9	1075	40	3
1478100	129	548500	Camberley	3005	Hastings Ward	30	Hastings District	06	Hawke's Bay Region	2.83738e+06	6.16871e+06	1	1478100	10	1476	58	3
2789000	219	599400	Fraser Park	6404	Timaru Ward	64	Timaru District	13	Canterbury Region	2.36921e+06	5.64467e+06	1	2789000	5	970	77	2
2789100	189	599400	Fraser Park	6404	Timaru Ward	64	Timaru District	13	Canterbury Region	2.36944e+06	5.64474e+06	1	2789100	7	1026	66	2
2788400	156	599400	Fraser Park	6404	Timaru Ward	64	Timaru District	13	Canterbury Region	2.36903e+06	5.64465e+06	1	2788400	7	1030	55	2
692202	66	522820	Sunnyhills	803	Pakuranga Ward	8	Manukau City	02	Auckland Region	2.67835e+06	6.47561e+06	1	692202	1	876	22	1
2657600	156	591700	Avon Loop	6005	Hagley-Ferrymead Ward	60	Christchurch City	13	Canterbury Region	2.48157e+06	5.7418e+06	1	2657600	8	1041	70	3
691300	201	522810	Pakuranga North	803	Pakuranga Ward	8	Manukau City	02	Auckland Region	2.67895e+06	6.47589e+06	1	691300	6	985	70	2
2134100	273	573101	Willis Street-Cambridge Terrace	4703	Lambton Ward	47	Wellington City	09	Wellington Region	2.65876e+06	5.9886e+06	1	2134100	9	1110	123	3
822405	153	525921	Pukekohe West	1003	Pukekohe Ward	10	Franklin District	02	Auckland Region	2.67882e+06	6.44116e+06	1	822405	6	997	54	2
2527500	96	588500	Kaimahi	6002	Fendalton-Waimairi Ward	60	Christchurch City	13	Canterbury Region	2.4763e+06	5.74757e+06	1	2527500	2	908	32	1
2657700	135	591700	Avon Loop	6005	Hagley-Ferrymead Ward	60	Christchurch City	13	Canterbury Region	2.48129e+06	5.74171e+06	1	2657700	9	1092	61	3
2657800	135	591700	Avon Loop	6005	Hagley-Ferrymead Ward	60	Christchurch City	13	Canterbury Region	2.48158e+06	5.74176e+06	1	2657800	7	1005	47	2
2133900	15	573101	Willis Street-Cambridge Terrace	4703	Lambton Ward	47	Wellington City	09	Wellington Region	2.65898e+06	5.98858e+06	1	2133900	7	1003	5	2
690900	144	523000	Pakuranga East	803	Pakuranga Ward	8	Manukau City	02	Auckland Region	2.67859e+06	6.47521e+06	1	690900	9	1084	65	3
2133500	87	573101	Willis Street-Cambridge Terrace	4703	Lambton Ward	47	Wellington City	09	Wellington Region	2.65876e+06	5.98894e+06	1	2133500	7	1009	30	2
559800	222	518500	Three Kings	702	Avondale-Roskill Ward	7	Auckland City	02	Auckland Region	2.66554e+06	6.47692e+06	1	559800	3	931	73	1
822800	45	525922	Bledisloe Park	1003	Pukekohe Ward	10	Franklin District	02	Auckland Region	2.679e+06	6.44042e+06	1	822800	2	914	15	1
822702	84	525921	Pukekohe West	1003	Pukekohe Ward	10	Franklin District	02	Auckland Region	2.67882e+06	6.44083e+06	1	822702	3	932	28	1
822703	90	525921	Pukekohe West	1003	Pukekohe Ward	10	Franklin District	02	Auckland Region	2.67867e+06	6.44062e+06	1	822703	3	932	30	1
823300	9	525922	Bledisloe Park	1003	Pukekohe Ward	10	Franklin District	02	Auckland Region	2.67972e+06	6.44227e+06	1	823300	4	944	3	2
822000	57	525921	Pukekohe West	1003	Pukekohe Ward	10	Franklin District	02	Auckland Region	2.67865e+06	6.44242e+06	1	822000	7	1015	20	2
821900	93	525921	Pukekohe West	1003	Pukekohe Ward	10	Franklin District	02	Auckland Region	2.67887e+06	6.4423e+06	1	821900	7	1018	33	2
1478600	153	548500	Camberley	3005	Hastings Ward	30	Hastings District	06	Hawke's Bay Region	2.83786e+06	6.16827e+06	1	1478600	10	1311	69	3
1478700	30	548500	Camberley	3005	Hastings Ward	30	Hastings District	06	Hawke's Bay Region	2.83837e+06	6.16825e+06	1	1478700	10	1311	14	3
560000	183	518500	Three Kings	702	Avondale-Roskill Ward	7	Auckland City	02	Auckland Region	2.66546e+06	6.47667e+06	1	560000	5	954	64	2
2920700	162	604110	Mornington	7104	Hills Ward	71	Dunedin City	14	Otago Region	2.31489e+06	5.47726e+06	1	2920700	8	1032	73	3
2526400	162	588500	Kaimahi	6002	Fendalton-Waimairi Ward	60	Christchurch City	13	Canterbury Region	2.47655e+06	5.7474e+06	1	2526400	3	919	53	1
2132900	12	573101	Willis Street-Cambridge Terrace	4703	Lambton Ward	47	Wellington City	09	Wellington Region	2.65829e+06	5.98851e+06	1	2132900	8	1061	5	3
691000	132	523000	Pakuranga East	803	Pakuranga Ward	8	Manukau City	02	Auckland Region	2.67869e+06	6.47509e+06	1	691000	6	996	46	2
2133300	39	573101	Willis Street-Cambridge Terrace	4703	Lambton Ward	47	Wellington City	09	Wellington Region	2.65885e+06	5.98913e+06	1	2133300	7	1009	14	2
2133400	267	573101	Willis Street-Cambridge Terrace	4703	Lambton Ward	47	Wellington City	09	Wellington Region	2.65886e+06	5.98889e+06	1	2133400	6	992	93	2
822705	27	525921	Pukekohe West	1003	Pukekohe Ward	10	Franklin District	02	Auckland Region	2.67854e+06	6.4401e+06	1	822705	5	959	9	2
2133000	9	573101	Willis Street-Cambridge Terrace	4703	Lambton Ward	47	Wellington City	09	Wellington Region	2.65902e+06	5.98926e+06	1	2133000	7	1009	3	2
822200	165	525921	Pukekohe West	1003	Pukekohe Ward	10	Franklin District	02	Auckland Region	2.6788e+06	6.44208e+06	1	822200	7	1015	58	2
822100	174	525921	Pukekohe West	1003	Pukekohe Ward	10	Franklin District	02	Auckland Region	2.67864e+06	6.44219e+06	1	822100	6	991	61	2
1477700	75	547800	Frimley	3005	Hastings Ward	30	Hastings District	06	Hawke's Bay Region	2.83863e+06	6.16818e+06	1	1477700	5	955	26	2
2526200	171	588500	Kaimahi	6002	Fendalton-Waimairi Ward	60	Christchurch City	13	Canterbury Region	2.47671e+06	5.74672e+06	1	2526200	3	920	56	1
2527202	57	588500	Kaimahi	6002	Fendalton-Waimairi Ward	60	Christchurch City	13	Canterbury Region	2.476e+06	5.74781e+06	1	2527202	3	920	19	1
2787900	264	599100	Highfield	6404	Timaru Ward	64	Timaru District	13	Canterbury Region	2.36891e+06	5.645e+06	1	2787900	4	936	92	2
2658000	9	591700	Avon Loop	6005	Hagley-Ferrymead Ward	60	Christchurch City	13	Canterbury Region	2.48128e+06	5.74161e+06	1	2658000	9	1092	4	3
2657400	159	591700	Avon Loop	6005	Hagley-Ferrymead Ward	60	Christchurch City	13	Canterbury Region	2.48127e+06	5.74184e+06	1	2657400	9	1084	72	3
2657500	144	591700	Avon Loop	6005	Hagley-Ferrymead Ward	60	Christchurch City	13	Canterbury Region	2.48155e+06	5.74188e+06	1	2657500	10	1194	65	3
561200	87	518500	Three Kings	702	Avondale-Roskill Ward	7	Auckland City	02	Auckland Region	2.6659e+06	6.47676e+06	1	561200	6	974	30	2
2133200	153	573101	Willis Street-Cambridge Terrace	4703	Lambton Ward	47	Wellington City	09	Wellington Region	2.65894e+06	5.98906e+06	1	2133200	9	1106	69	3
433801	12	514102	Auckland Central West	704	Hobson Ward	7	Auckland City	02	Auckland Region	2.66753e+06	6.48213e+06	1	433801	10	1198	5	3
695102	78	522820	Sunnyhills	803	Pakuranga Ward	8	Manukau City	02	Auckland Region	2.67828e+06	6.47542e+06	1	695102	1	893	26	1
564400	156	518600	Royal Oak	702	Avondale-Roskill Ward	7	Auckland City	02	Auckland Region	2.66723e+06	6.47577e+06	1	564400	3	920	51	1
2137700	36	576600	Oriental Bay	4703	Lambton Ward	47	Wellington City	09	Wellington Region	2.66034e+06	5.98907e+06	1	2137700	4	937	13	2
826000	75	521112	Eden Road-Hill Top	1002	Northern Ward	10	Franklin District	02	Auckland Region	2.67699e+06	6.44057e+06	1	826000	4	938	26	2
695900	144	523401	Grange	802	Papatoetoe Ward	8	Manukau City	02	Auckland Region	2.67522e+06	6.46959e+06	1	695900	6	986	50	2
433003	165	514101	Auckland Harbourside	704	Hobson Ward	7	Auckland City	02	Auckland Region	2.66756e+06	6.48259e+06	1	433003	6	982	58	2
433403	81	514102	Auckland Central West	704	Hobson Ward	7	Auckland City	02	Auckland Region	2.66753e+06	6.48225e+06	1	433403	10	1152	36	3
564502	138	518600	Royal Oak	702	Avondale-Roskill Ward	7	Auckland City	02	Auckland Region	2.6675e+06	6.47579e+06	1	564502	2	917	46	1
2791700	66	599500	Seaview	6404	Timaru Ward	64	Timaru District	13	Canterbury Region	2.37024e+06	5.64466e+06	1	2791700	8	1051	30	3
2791500	147	599500	Seaview	6404	Timaru Ward	64	Timaru District	13	Canterbury Region	2.37007e+06	5.64477e+06	1	2791500	8	1051	66	3
2922602	105	604120	Belleknowes	7104	Hills Ward	71	Dunedin City	14	Otago Region	2.31406e+06	5.47853e+06	1	2922602	3	931	35	1
433303	306	514102	Auckland Central West	704	Hobson Ward	7	Auckland City	02	Auckland Region	2.6674e+06	6.4823e+06	1	433303	10	1167	138	3
433102	87	514102	Auckland Central West	704	Hobson Ward	7	Auckland City	02	Auckland Region	2.66777e+06	6.48257e+06	1	433102	9	1103	39	3
433304	87	514102	Auckland Central West	704	Hobson Ward	7	Auckland City	02	Auckland Region	2.66747e+06	6.48228e+06	1	433304	9	1100	39	3
2659800	174	594700	Addington	6006	Spreydon-Heathcote Ward	60	Christchurch City	13	Canterbury Region	2.47929e+06	5.74019e+06	1	2659800	9	1109	78	3
2791000	126	599500	Seaview	6404	Timaru Ward	64	Timaru District	13	Canterbury Region	2.36987e+06	5.64449e+06	1	2791000	8	1037	57	3
2922500	159	604120	Belleknowes	7104	Hills Ward	71	Dunedin City	14	Otago Region	2.3145e+06	5.4783e+06	1	2922500	2	906	52	1
561800	123	518500	Three Kings	702	Avondale-Roskill Ward	7	Auckland City	02	Auckland Region	2.66588e+06	6.47645e+06	1	561800	10	1164	55	3
2528802	117	588402	Sawyers Arms	6001	Shirley-Papanui Ward	60	Christchurch City	13	Canterbury Region	2.47701e+06	5.74736e+06	1	2528802	4	935	41	2
2527601	174	588500	Kaimahi	6002	Fendalton-Waimairi Ward	60	Christchurch City	13	Canterbury Region	2.47616e+06	5.74737e+06	1	2527601	2	907	57	1
2660300	147	594700	Addington	6006	Spreydon-Heathcote Ward	60	Christchurch City	13	Canterbury Region	2.47891e+06	5.74018e+06	1	2660300	10	1442	66	3
2660100	297	594700	Addington	6006	Spreydon-Heathcote Ward	60	Christchurch City	13	Canterbury Region	2.47882e+06	5.74036e+06	1	2660100	9	1119	134	3
2134600	108	573101	Willis Street-Cambridge Terrace	4703	Lambton Ward	47	Wellington City	09	Wellington Region	2.65857e+06	5.98846e+06	1	2134600	9	1127	49	3
2135700	93	573101	Willis Street-Cambridge Terrace	4703	Lambton Ward	47	Wellington City	09	Wellington Region	2.65928e+06	5.98889e+06	1	2135700	5	974	33	2
823900	78	525922	Bledisloe Park	1003	Pukekohe Ward	10	Franklin District	02	Auckland Region	2.67955e+06	6.4419e+06	1	823900	7	1003	27	2
1479500	114	548500	Camberley	3005	Hastings Ward	30	Hastings District	06	Hawke's Bay Region	2.83794e+06	6.16801e+06	1	1479500	10	1220	51	3
562800	162	518500	Three Kings	702	Avondale-Roskill Ward	7	Auckland City	02	Auckland Region	2.66623e+06	6.47593e+06	1	562800	9	1094	73	3
2528400	57	588402	Sawyers Arms	6001	Shirley-Papanui Ward	60	Christchurch City	13	Canterbury Region	2.47746e+06	5.74727e+06	1	2528400	4	940	20	2
561600	72	518500	Three Kings	702	Avondale-Roskill Ward	7	Auckland City	02	Auckland Region	2.66591e+06	6.47655e+06	1	561600	4	953	25	2
2134800	177	573101	Willis Street-Cambridge Terrace	4703	Lambton Ward	47	Wellington City	09	Wellington Region	2.65877e+06	5.98843e+06	1	2134800	10	1232	80	3
563000	87	518500	Three Kings	702	Avondale-Roskill Ward	7	Auckland City	02	Auckland Region	2.66647e+06	6.47592e+06	1	563000	10	1141	39	3
824000	129	525922	Bledisloe Park	1003	Pukekohe Ward	10	Franklin District	02	Auckland Region	2.67936e+06	6.44188e+06	1	824000	7	1003	45	2
1480000	123	547900	Raureka	3005	Hastings Ward	30	Hastings District	06	Hawke's Bay Region	2.83824e+06	6.16727e+06	1	1480000	6	977	43	2
1928700	150	568101	Tawhai	4603	Northern Ward	46	Lower Hutt City	09	Wellington Region	2.67661e+06	6.00262e+06	1	1928700	6	992	52	2
2528801	60	588402	Sawyers Arms	6001	Shirley-Papanui Ward	60	Christchurch City	13	Canterbury Region	2.47661e+06	5.74757e+06	1	2528801	3	923	20	1
2790700	135	599500	Seaview	6404	Timaru Ward	64	Timaru District	13	Canterbury Region	2.36966e+06	5.64472e+06	1	2790700	5	970	47	2
2791400	138	599500	Seaview	6404	Timaru Ward	64	Timaru District	13	Canterbury Region	2.36969e+06	5.64385e+06	1	2791400	7	1018	48	2
2659301	3	594700	Addington	6006	Spreydon-Heathcote Ward	60	Christchurch City	13	Canterbury Region	2.47909e+06	5.74069e+06	1	2659301	9	1091	1	3
2660200	126	594700	Addington	6006	Spreydon-Heathcote Ward	60	Christchurch City	13	Canterbury Region	2.47868e+06	5.74024e+06	1	2660200	9	1102	57	3
563200	183	518500	Three Kings	702	Avondale-Roskill Ward	7	Auckland City	02	Auckland Region	2.66706e+06	6.47607e+06	1	563200	2	917	60	1
2135000	9	573101	Willis Street-Cambridge Terrace	4703	Lambton Ward	47	Wellington City	09	Wellington Region	2.65883e+06	5.98836e+06	1	2135000	9	1127	4	3
562400	147	518500	Three Kings	702	Avondale-Roskill Ward	7	Auckland City	02	Auckland Region	2.66673e+06	6.47635e+06	1	562400	9	1095	66	3
823700	48	525922	Bledisloe Park	1003	Pukekohe Ward	10	Franklin District	02	Auckland Region	2.67977e+06	6.4408e+06	1	823700	9	1111	22	3
1479600	135	548500	Camberley	3005	Hastings Ward	30	Hastings District	06	Hawke's Bay Region	2.83812e+06	6.1677e+06	1	1479600	8	1038	61	3
563100	174	518500	Three Kings	702	Avondale-Roskill Ward	7	Auckland City	02	Auckland Region	2.66669e+06	6.476e+06	1	563100	10	1220	78	3
2921700	102	604110	Mornington	7104	Hills Ward	71	Dunedin City	14	Otago Region	2.31478e+06	5.47738e+06	1	2921700	2	913	34	1
2922000	90	604120	Belleknowes	7104	Hills Ward	71	Dunedin City	14	Otago Region	2.31405e+06	5.4779e+06	1	2922000	5	967	31	2
2790900	90	599500	Seaview	6404	Timaru Ward	64	Timaru District	13	Canterbury Region	2.36967e+06	5.64453e+06	1	2790900	5	965	31	2
2134400	15	573101	Willis Street-Cambridge Terrace	4703	Lambton Ward	47	Wellington City	09	Wellington Region	2.6586e+06	5.98859e+06	1	2134400	7	1028	5	2
2136000	162	573101	Willis Street-Cambridge Terrace	4703	Lambton Ward	47	Wellington City	09	Wellington Region	2.65922e+06	5.98876e+06	1	2136000	5	962	57	2
561500	81	518500	Three Kings	702	Avondale-Roskill Ward	7	Auckland City	02	Auckland Region	2.66621e+06	6.47657e+06	1	561500	4	947	28	2
1479700	84	548500	Camberley	3005	Hastings Ward	30	Hastings District	06	Hawke's Bay Region	2.83809e+06	6.16761e+06	1	1479700	10	1220	38	3
1479100	111	548500	Camberley	3005	Hastings Ward	30	Hastings District	06	Hawke's Bay Region	2.83762e+06	6.16829e+06	1	1479100	10	1238	50	3
562200	120	518500	Three Kings	702	Avondale-Roskill Ward	7	Auckland City	02	Auckland Region	2.66641e+06	6.47631e+06	1	562200	10	1153	54	3
2920900	120	604110	Mornington	7104	Hills Ward	71	Dunedin City	14	Otago Region	2.31463e+06	5.4772e+06	1	2920900	8	1030	54	3
2791200	138	599500	Seaview	6404	Timaru Ward	64	Timaru District	13	Canterbury Region	2.36988e+06	5.64428e+06	1	2791200	9	1089	62	3
2659500	198	594700	Addington	6006	Spreydon-Heathcote Ward	60	Christchurch City	13	Canterbury Region	2.47903e+06	5.74041e+06	1	2659500	7	1008	69	2
2134900	297	573101	Willis Street-Cambridge Terrace	4703	Lambton Ward	47	Wellington City	09	Wellington Region	2.65888e+06	5.98847e+06	1	2134900	8	1033	134	3
2134500	9	573101	Willis Street-Cambridge Terrace	4703	Lambton Ward	47	Wellington City	09	Wellington Region	2.65868e+06	5.98853e+06	1	2134500	7	1028	3	2
561900	150	518500	Three Kings	702	Avondale-Roskill Ward	7	Auckland City	02	Auckland Region	2.66616e+06	6.47636e+06	1	561900	6	983	52	2
824302	45	521113	Buckland	1004	Southern Ward	10	Franklin District	03	Waikato Region	2.68054e+06	6.43954e+06	1	824302	3	926	15	1
1479900	132	547900	Raureka	3005	Hastings Ward	30	Hastings District	06	Hawke's Bay Region	2.83817e+06	6.16737e+06	1	1479900	5	972	46	2
824100	219	525922	Bledisloe Park	1003	Pukekohe Ward	10	Franklin District	02	Auckland Region	2.67913e+06	6.44189e+06	1	824100	7	1013	77	2
1479200	93	548500	Camberley	3005	Hastings Ward	30	Hastings District	06	Hawke's Bay Region	2.83768e+06	6.16819e+06	1	1479200	10	1249	42	3
300600	117	512700	Waima	604	New Lynn Ward	6	Waitakere City	02	Auckland Region	2.65575e+06	6.47102e+06	1	300600	3	929	39	1
2921000	39	604110	Mornington	7104	Hills Ward	71	Dunedin City	14	Otago Region	2.3139e+06	5.47767e+06	1	2921000	6	990	14	2
561700	78	518500	Three Kings	702	Avondale-Roskill Ward	7	Auckland City	02	Auckland Region	2.66618e+06	6.47648e+06	1	561700	4	953	27	2
562000	102	518500	Three Kings	702	Avondale-Roskill Ward	7	Auckland City	02	Auckland Region	2.66641e+06	6.4765e+06	1	562000	8	1044	46	3
2528600	42	588402	Sawyers Arms	6001	Shirley-Papanui Ward	60	Christchurch City	13	Canterbury Region	2.47631e+06	5.74773e+06	1	2528600	1	894	14	1
2659900	177	594700	Addington	6006	Spreydon-Heathcote Ward	60	Christchurch City	13	Canterbury Region	2.47911e+06	5.74006e+06	1	2659900	10	1146	80	3
2791300	141	599500	Seaview	6404	Timaru Ward	64	Timaru District	13	Canterbury Region	2.36969e+06	5.64411e+06	1	2791300	9	1112	63	3
2659600	159	594700	Addington	6006	Spreydon-Heathcote Ward	60	Christchurch City	13	Canterbury Region	2.47924e+06	5.74037e+06	1	2659600	10	1185	72	3
2659700	96	594700	Addington	6006	Spreydon-Heathcote Ward	60	Christchurch City	13	Canterbury Region	2.47939e+06	5.74037e+06	1	2659700	10	1146	43	3
2136100	24	573101	Willis Street-Cambridge Terrace	4703	Lambton Ward	47	Wellington City	09	Wellington Region	2.65925e+06	5.98866e+06	1	2136100	2	917	8	1
2921900	210	604120	Belleknowes	7104	Hills Ward	71	Dunedin City	14	Otago Region	2.31406e+06	5.47808e+06	1	2921900	1	870	69	1
434402	201	514102	Auckland Central West	704	Hobson Ward	7	Auckland City	02	Auckland Region	2.66701e+06	6.48175e+06	1	434402	9	1112	90	3
2794100	126	599500	Seaview	6404	Timaru Ward	64	Timaru District	13	Canterbury Region	2.37007e+06	5.64406e+06	1	2794100	10	1146	57	3
2794200	45	599500	Seaview	6404	Timaru Ward	64	Timaru District	13	Canterbury Region	2.37022e+06	5.64406e+06	1	2794200	9	1117	20	3
2794300	18	599500	Seaview	6404	Timaru Ward	64	Timaru District	13	Canterbury Region	2.3703e+06	5.64409e+06	1	2794300	9	1117	8	3
2794400	9	599500	Seaview	6404	Timaru Ward	64	Timaru District	13	Canterbury Region	2.37042e+06	5.64412e+06	1	2794400	9	1117	4	3
2794800	15	599500	Seaview	6404	Timaru Ward	64	Timaru District	13	Canterbury Region	2.3705e+06	5.64387e+06	1	2794800	9	1117	7	3
1482600	123	547900	Raureka	3005	Hastings Ward	30	Hastings District	06	Hawke's Bay Region	2.83871e+06	6.1657e+06	1	1482600	5	968	43	2
2138900	63	573400	Mt Victoria West	4703	Lambton Ward	47	Wellington City	09	Wellington Region	2.65955e+06	5.9889e+06	1	2138900	8	1050	28	3
2138600	81	573400	Mt Victoria West	4703	Lambton Ward	47	Wellington City	09	Wellington Region	2.65977e+06	5.98889e+06	1	2138600	1	888	27	1
2138800	111	573400	Mt Victoria West	4703	Lambton Ward	47	Wellington City	09	Wellington Region	2.65965e+06	5.98899e+06	1	2138800	4	942	39	2
435500	78	514102	Auckland Central West	704	Hobson Ward	7	Auckland City	02	Auckland Region	2.66719e+06	6.48135e+06	1	435500	8	1062	35	3
696803	384	522301	Dingwall	802	Papatoetoe Ward	8	Manukau City	02	Auckland Region	2.67592e+06	6.46945e+06	1	696803	5	955	134	2
696701	21	523401	Grange	802	Papatoetoe Ward	8	Manukau City	02	Auckland Region	2.67539e+06	6.47001e+06	1	696701	10	1283	9	3
2662100	75	591900	Papanui	6001	Shirley-Papanui Ward	60	Christchurch City	13	Canterbury Region	2.47866e+06	5.74557e+06	1	2662100	8	1056	34	3
434902	36	514102	Auckland Central West	704	Hobson Ward	7	Auckland City	02	Auckland Region	2.66733e+06	6.48159e+06	1	434902	9	1130	16	3
2139000	126	573400	Mt Victoria West	4703	Lambton Ward	47	Wellington City	09	Wellington Region	2.65946e+06	5.98881e+06	1	2139000	6	995	44	2
2138200	147	576600	Oriental Bay	4703	Lambton Ward	47	Wellington City	09	Wellington Region	2.66023e+06	5.98901e+06	1	2138200	3	933	49	1
2138700	69	573400	Mt Victoria West	4703	Lambton Ward	47	Wellington City	09	Wellington Region	2.65973e+06	5.98897e+06	1	2138700	8	1050	31	3
303102	159	512802	Armour Bay	602	Waitakere Ward	6	Waitakere City	02	Auckland Region	2.65396e+06	6.46849e+06	1	303102	1	898	52	1
434401	201	514102	Auckland Central West	704	Hobson Ward	7	Auckland City	02	Auckland Region	2.66709e+06	6.48189e+06	1	434401	8	1037	90	3
2661700	81	591900	Papanui	6001	Shirley-Papanui Ward	60	Christchurch City	13	Canterbury Region	2.4787e+06	5.74568e+06	1	2661700	7	1013	28	2
695002	189	522820	Sunnyhills	803	Pakuranga Ward	8	Manukau City	02	Auckland Region	2.67798e+06	6.47529e+06	1	695002	2	903	62	1
433001	60	514101	Auckland Harbourside	704	Hobson Ward	7	Auckland City	02	Auckland Region	2.66762e+06	6.48277e+06	1	433001	4	939	21	2
2792800	6	599500	Seaview	6404	Timaru Ward	64	Timaru District	13	Canterbury Region	2.37067e+06	5.6444e+06	1	2792800	8	1061	3	3
2791900	78	599500	Seaview	6404	Timaru Ward	64	Timaru District	13	Canterbury Region	2.3701e+06	5.64444e+06	1	2791900	6	989	27	2
2792000	33	599500	Seaview	6404	Timaru Ward	64	Timaru District	13	Canterbury Region	2.37029e+06	5.64447e+06	1	2792000	6	989	12	2
2793100	3	599500	Seaview	6404	Timaru Ward	64	Timaru District	13	Canterbury Region	2.37119e+06	5.64418e+06	1	2793100	8	1061	1	3
2792700	66	599500	Seaview	6404	Timaru Ward	64	Timaru District	13	Canterbury Region	2.37076e+06	5.64448e+06	1	2792700	8	1061	30	3
2137000	3	573101	Willis Street-Cambridge Terrace	4703	Lambton Ward	47	Wellington City	09	Wellington Region	2.659e+06	5.9883e+06	1	2137000	8	1052	1	3
1482400	111	547900	Raureka	3005	Hastings Ward	30	Hastings District	06	Hawke's Bay Region	2.83887e+06	6.16587e+06	1	1482400	7	1019	39	2
1481100	96	547900	Raureka	3005	Hastings Ward	30	Hastings District	06	Hawke's Bay Region	2.8377e+06	6.16697e+06	1	1481100	10	1285	43	3
564600	144	518600	Royal Oak	702	Avondale-Roskill Ward	7	Auckland City	02	Auckland Region	2.66738e+06	6.47562e+06	1	564600	4	949	50	2
433402	246	514102	Auckland Central West	704	Hobson Ward	7	Auckland City	02	Auckland Region	2.66756e+06	6.48229e+06	1	433402	10	1213	111	3
433501	84	514102	Auckland Central West	704	Hobson Ward	7	Auckland City	02	Auckland Region	2.66779e+06	6.48233e+06	1	433501	10	1188	38	3
695600	177	522820	Sunnyhills	803	Pakuranga Ward	8	Manukau City	02	Auckland Region	2.67656e+06	6.47504e+06	1	695600	6	998	62	2
564900	132	518600	Royal Oak	702	Avondale-Roskill Ward	7	Auckland City	02	Auckland Region	2.66777e+06	6.47571e+06	1	564900	7	1000	46	2
2922800	102	604120	Belleknowes	7104	Hills Ward	71	Dunedin City	14	Otago Region	2.31435e+06	5.47831e+06	1	2922800	2	900	34	1
2660400	168	594700	Addington	6006	Spreydon-Heathcote Ward	60	Christchurch City	13	Canterbury Region	2.47862e+06	5.74009e+06	1	2660400	9	1115	76	3
433502	132	514102	Auckland Central West	704	Hobson Ward	7	Auckland City	02	Auckland Region	2.66775e+06	6.48228e+06	1	433502	10	1161	59	3
694700	123	522820	Sunnyhills	803	Pakuranga Ward	8	Manukau City	02	Auckland Region	2.67688e+06	6.475e+06	1	694700	5	960	43	2
2136600	51	573101	Willis Street-Cambridge Terrace	4703	Lambton Ward	47	Wellington City	09	Wellington Region	2.65906e+06	5.9885e+06	1	2136600	8	1052	23	3
2136400	216	573101	Willis Street-Cambridge Terrace	4703	Lambton Ward	47	Wellington City	09	Wellington Region	2.65902e+06	5.98866e+06	1	2136400	6	991	76	2
564700	114	518600	Royal Oak	702	Avondale-Roskill Ward	7	Auckland City	02	Auckland Region	2.6675e+06	6.47557e+06	1	564700	3	932	38	1
825900	90	521112	Eden Road-Hill Top	1002	Northern Ward	10	Franklin District	02	Auckland Region	2.6769e+06	6.44107e+06	1	825900	4	938	31	2
433301	333	514102	Auckland Central West	704	Hobson Ward	7	Auckland City	02	Auckland Region	2.66746e+06	6.48238e+06	1	433301	8	1041	150	3
433503	111	514102	Auckland Central West	704	Hobson Ward	7	Auckland City	02	Auckland Region	2.66782e+06	6.48224e+06	1	433503	10	1188	50	3
2136700	21	573101	Willis Street-Cambridge Terrace	4703	Lambton Ward	47	Wellington City	09	Wellington Region	2.65916e+06	5.98843e+06	1	2136700	8	1052	9	3
433103	135	514102	Auckland Central West	704	Hobson Ward	7	Auckland City	02	Auckland Region	2.66769e+06	6.48244e+06	1	433103	9	1103	61	3
564000	165	518600	Royal Oak	702	Avondale-Roskill Ward	7	Auckland City	02	Auckland Region	2.66723e+06	6.47605e+06	1	564000	4	952	58	2
2137600	174	576600	Oriental Bay	4703	Lambton Ward	47	Wellington City	09	Wellington Region	2.66049e+06	5.98904e+06	1	2137600	4	937	61	2
2137400	75	576600	Oriental Bay	4703	Lambton Ward	47	Wellington City	09	Wellington Region	2.66059e+06	5.98927e+06	1	2137400	1	885	25	1
695800	189	523401	Grange	802	Papatoetoe Ward	8	Manukau City	02	Auckland Region	2.67539e+06	6.46955e+06	1	695800	8	1037	85	3
826603	141	525910	Pukekohe North	1003	Pukekohe Ward	10	Franklin District	02	Auckland Region	2.67883e+06	6.44445e+06	1	826603	1	885	47	1
302700	324	512801	Laingholm	602	Waitakere Ward	6	Waitakere City	02	Auckland Region	2.65515e+06	6.46982e+06	1	302700	2	911	107	1
564100	147	518600	Royal Oak	702	Avondale-Roskill Ward	7	Auckland City	02	Auckland Region	2.66735e+06	6.47603e+06	1	564100	2	910	49	1
2662000	36	591900	Papanui	6001	Shirley-Papanui Ward	60	Christchurch City	13	Canterbury Region	2.47852e+06	5.74559e+06	1	2662000	4	948	13	2
2792500	18	599500	Seaview	6404	Timaru Ward	64	Timaru District	13	Canterbury Region	2.37037e+06	5.6447e+06	1	2792500	8	1051	8	3
433005	54	514101	Auckland Harbourside	704	Hobson Ward	7	Auckland City	02	Auckland Region	2.66743e+06	6.48264e+06	1	433005	1	888	18	1
433802	135	514102	Auckland Central West	704	Hobson Ward	7	Auckland City	02	Auckland Region	2.66758e+06	6.4821e+06	1	433802	10	1198	61	3
2136200	84	573101	Willis Street-Cambridge Terrace	4703	Lambton Ward	47	Wellington City	09	Wellington Region	2.65922e+06	5.98862e+06	1	2136200	2	917	28	1
695101	27	522820	Sunnyhills	803	Pakuranga Ward	8	Manukau City	02	Auckland Region	2.67826e+06	6.47557e+06	1	695101	1	893	9	1
564800	123	518600	Royal Oak	702	Avondale-Roskill Ward	7	Auckland City	02	Auckland Region	2.6678e+06	6.47582e+06	1	564800	2	904	41	1
2792100	9	599500	Seaview	6404	Timaru Ward	64	Timaru District	13	Canterbury Region	2.37043e+06	5.64445e+06	1	2792100	8	1061	4	3
2791600	123	599500	Seaview	6404	Timaru Ward	64	Timaru District	13	Canterbury Region	2.37003e+06	5.64467e+06	1	2791600	7	1014	43	2
2791800	99	599500	Seaview	6404	Timaru Ward	64	Timaru District	13	Canterbury Region	2.37009e+06	5.64455e+06	1	2791800	5	958	35	2
2922700	186	604120	Belleknowes	7104	Hills Ward	71	Dunedin City	14	Otago Region	2.31425e+06	5.47845e+06	1	2922700	2	906	61	1
2922601	18	604120	Belleknowes	7104	Hills Ward	71	Dunedin City	14	Otago Region	2.3138e+06	5.47885e+06	1	2922601	5	967	6	2
433600	33	514102	Auckland Central West	704	Hobson Ward	7	Auckland City	02	Auckland Region	2.66775e+06	6.48219e+06	1	433600	10	1152	15	3
2136900	3	573101	Willis Street-Cambridge Terrace	4703	Lambton Ward	47	Wellington City	09	Wellington Region	2.65912e+06	5.98834e+06	1	2136900	8	1052	1	3
2136500	60	573101	Willis Street-Cambridge Terrace	4703	Lambton Ward	47	Wellington City	09	Wellington Region	2.65914e+06	5.98854e+06	1	2136500	8	1052	27	3
433101	105	514102	Auckland Central West	704	Hobson Ward	7	Auckland City	02	Auckland Region	2.66768e+06	6.48258e+06	1	433101	8	1049	47	3
432700	60	514102	Auckland Central West	704	Hobson Ward	7	Auckland City	02	Auckland Region	2.66696e+06	6.4821e+06	1	432700	7	1001	21	2
1481200	174	547900	Raureka	3005	Hastings Ward	30	Hastings District	06	Hawke's Bay Region	2.83784e+06	6.167e+06	1	1481200	10	1245	78	3
826100	42	521112	Eden Road-Hill Top	1002	Northern Ward	10	Franklin District	02	Auckland Region	2.67728e+06	6.44008e+06	1	826100	4	938	15	2
432900	135	514101	Auckland Harbourside	704	Hobson Ward	7	Auckland City	02	Auckland Region	2.6679e+06	6.48259e+06	1	432900	7	1023	47	2
433401	9	514102	Auckland Central West	704	Hobson Ward	7	Auckland City	02	Auckland Region	2.66763e+06	6.48228e+06	1	433401	10	1152	4	3
2661800	60	591900	Papanui	6001	Shirley-Papanui Ward	60	Christchurch City	13	Canterbury Region	2.47854e+06	5.74572e+06	1	2661800	7	1013	21	2
433200	201	514102	Auckland Central West	704	Hobson Ward	7	Auckland City	02	Auckland Region	2.66787e+06	6.48246e+06	1	433200	10	1168	90	3
2792200	54	599500	Seaview	6404	Timaru Ward	64	Timaru District	13	Canterbury Region	2.37018e+06	5.64433e+06	1	2792200	6	989	19	2
2792300	27	599500	Seaview	6404	Timaru Ward	64	Timaru District	13	Canterbury Region	2.37035e+06	5.64433e+06	1	2792300	8	1061	12	3
2793000	15	599500	Seaview	6404	Timaru Ward	64	Timaru District	13	Canterbury Region	2.37092e+06	5.64425e+06	1	2793000	8	1061	7	3
433302	258	514102	Auckland Central West	704	Hobson Ward	7	Auckland City	02	Auckland Region	2.66751e+06	6.48231e+06	1	433302	7	1010	90	2
432600	312	514102	Auckland Central West	704	Hobson Ward	7	Auckland City	02	Auckland Region	2.66725e+06	6.48238e+06	1	432600	7	1008	109	2
432800	15	514101	Auckland Harbourside	704	Hobson Ward	7	Auckland City	02	Auckland Region	2.66778e+06	6.48274e+06	1	432800	10	1188	7	3
2136300	150	573101	Willis Street-Cambridge Terrace	4703	Lambton Ward	47	Wellington City	09	Wellington Region	2.6589e+06	5.9887e+06	1	2136300	5	964	52	2
564501	111	518600	Royal Oak	702	Avondale-Roskill Ward	7	Auckland City	02	Auckland Region	2.66753e+06	6.47592e+06	1	564501	1	887	37	1
2137500	123	576600	Oriental Bay	4703	Lambton Ward	47	Wellington City	09	Wellington Region	2.66052e+06	5.98914e+06	1	2137500	3	930	41	1
1481300	132	547900	Raureka	3005	Hastings Ward	30	Hastings District	06	Hawke's Bay Region	2.83778e+06	6.16681e+06	1	1481300	10	1285	59	3
695700	96	523401	Grange	802	Papatoetoe Ward	8	Manukau City	02	Auckland Region	2.67523e+06	6.46981e+06	1	695700	10	1213	43	3
302502	93	512801	Laingholm	602	Waitakere Ward	6	Waitakere City	02	Auckland Region	2.65532e+06	6.47019e+06	1	302502	1	881	31	1
2661900	66	591900	Papanui	6001	Shirley-Papanui Ward	60	Christchurch City	13	Canterbury Region	2.4784e+06	5.7456e+06	1	2661900	4	948	23	2
2922900	114	604120	Belleknowes	7104	Hills Ward	71	Dunedin City	14	Otago Region	2.31419e+06	5.47822e+06	1	2922900	2	909	38	1
2923200	108	604120	Belleknowes	7104	Hills Ward	71	Dunedin City	14	Otago Region	2.31385e+06	5.47812e+06	1	2923200	5	955	38	2
433006	57	514101	Auckland Harbourside	704	Hobson Ward	7	Auckland City	02	Auckland Region	2.66749e+06	6.48269e+06	1	433006	1	888	19	1
433700	93	514102	Auckland Central West	704	Hobson Ward	7	Auckland City	02	Auckland Region	2.6673e+06	6.48217e+06	1	433700	9	1100	42	3
2923000	147	604120	Belleknowes	7104	Hills Ward	71	Dunedin City	14	Otago Region	2.31401e+06	5.47829e+06	1	2923000	5	958	51	2
2136800	9	573101	Willis Street-Cambridge Terrace	4703	Lambton Ward	47	Wellington City	09	Wellington Region	2.65899e+06	5.9884e+06	1	2136800	8	1052	4	3
563600	102	518500	Three Kings	702	Avondale-Roskill Ward	7	Auckland City	02	Auckland Region	2.66663e+06	6.47577e+06	1	563600	10	1172	46	3
826602	135	521111	Paerata-Cape Hill	1003	Pukekohe Ward	10	Franklin District	02	Auckland Region	2.67877e+06	6.4448e+06	1	826602	3	931	45	1
301600	111	512700	Waima	604	New Lynn Ward	6	Waitakere City	02	Auckland Region	2.65575e+06	6.47127e+06	1	301600	1	890	37	1
2795700	33	599500	Seaview	6404	Timaru Ward	64	Timaru District	13	Canterbury Region	2.37075e+06	5.64392e+06	1	2795700	10	1145	15	3
2795400	9	599500	Seaview	6404	Timaru Ward	64	Timaru District	13	Canterbury Region	2.37084e+06	5.644e+06	1	2795400	10	1145	4	3
2795500	9	599500	Seaview	6404	Timaru Ward	64	Timaru District	13	Canterbury Region	2.37098e+06	5.64405e+06	1	2795500	10	1145	4	3
567401	99	518702	Hillsborough East	702	Avondale-Roskill Ward	7	Auckland City	02	Auckland Region	2.66749e+06	6.47536e+06	1	567401	3	924	33	1
2140900	60	573400	Mt Victoria West	4703	Lambton Ward	47	Wellington City	09	Wellington Region	2.65976e+06	5.98842e+06	1	2140900	4	952	21	2
435700	15	514102	Auckland Central West	704	Hobson Ward	7	Auckland City	02	Auckland Region	2.66731e+06	6.4812e+06	1	435700	5	958	5	2
567300	27	518600	Royal Oak	706	Tamaki-Maungakiekie Ward	7	Auckland City	02	Auckland Region	2.66849e+06	6.47531e+06	1	567300	2	911	9	1
2140600	99	573400	Mt Victoria West	4703	Lambton Ward	47	Wellington City	09	Wellington Region	2.65962e+06	5.98864e+06	1	2140600	6	997	35	2
1484900	99	547600	Mahora	3005	Hastings Ward	30	Hastings District	06	Hawke's Bay Region	2.84003e+06	6.16857e+06	1	1484900	6	976	35	2
1484800	114	547600	Mahora	3005	Hastings Ward	30	Hastings District	06	Hawke's Bay Region	2.83994e+06	6.16851e+06	1	1484800	6	976	40	2
436203	120	514103	Auckland Central East	704	Hobson Ward	7	Auckland City	02	Auckland Region	2.66755e+06	6.4813e+06	1	436203	10	1274	54	3
960200	90	527132	Hautapu	1703	Maungatautari Ward	17	Waipa District	03	Waikato Region	2.72635e+06	6.36722e+06	1	960200	3	928	30	1
436600	342	514103	Auckland Central East	704	Hobson Ward	7	Auckland City	02	Auckland Region	2.66777e+06	6.48168e+06	1	436600	10	1158	154	3
2664800	276	591800	Northcote	6001	Shirley-Papanui Ward	60	Christchurch City	13	Canterbury Region	2.47853e+06	5.74645e+06	1	2664800	5	968	97	2
2665100	102	591800	Northcote	6001	Shirley-Papanui Ward	60	Christchurch City	13	Canterbury Region	2.47838e+06	5.74714e+06	1	2665100	10	1223	46	3
2665200	60	591800	Northcote	6001	Shirley-Papanui Ward	60	Christchurch City	13	Canterbury Region	2.47854e+06	5.74712e+06	1	2665200	8	1060	27	3
304700	75	507900	Westlake	502	Central Ward	5	North Shore City	02	Auckland Region	2.66759e+06	6.48921e+06	1	304700	2	899	25	1
304500	60	507900	Westlake	502	Central Ward	5	North Shore City	02	Auckland Region	2.6674e+06	6.48921e+06	1	304500	5	973	21	2
2140100	90	573400	Mt Victoria West	4703	Lambton Ward	47	Wellington City	09	Wellington Region	2.65971e+06	5.98883e+06	1	2140100	5	956	31	2
436700	93	514103	Auckland Central East	704	Hobson Ward	7	Auckland City	02	Auckland Region	2.66789e+06	6.48169e+06	1	436700	10	1175	42	3
436900	942	514103	Auckland Central East	704	Hobson Ward	7	Auckland City	02	Auckland Region	2.66794e+06	6.48153e+06	1	436900	10	1265	424	3
567200	114	518600	Royal Oak	706	Tamaki-Maungakiekie Ward	7	Auckland City	02	Auckland Region	2.66822e+06	6.47528e+06	1	567200	2	911	38	1
1485200	153	547600	Mahora	3005	Hastings Ward	30	Hastings District	06	Hawke's Bay Region	2.83966e+06	6.16832e+06	1	1485200	10	1224	69	3
1484700	72	547600	Mahora	3005	Hastings Ward	30	Hastings District	06	Hawke's Bay Region	2.83987e+06	6.1684e+06	1	1484700	7	1005	25	2
2663900	102	591800	Northcote	6001	Shirley-Papanui Ward	60	Christchurch City	13	Canterbury Region	2.47909e+06	5.74655e+06	1	2663900	7	1019	36	2
2665300	117	591800	Northcote	6001	Shirley-Papanui Ward	60	Christchurch City	13	Canterbury Region	2.47874e+06	5.74713e+06	1	2665300	10	1223	53	3
435202	27	514102	Auckland Central West	704	Hobson Ward	7	Auckland City	02	Auckland Region	2.66745e+06	6.48153e+06	1	435202	1	894	9	1
303502	144	507900	Westlake	502	Central Ward	5	North Shore City	02	Auckland Region	2.66713e+06	6.48906e+06	1	303502	7	1002	50	2
434000	24	514102	Auckland Central West	704	Hobson Ward	7	Auckland City	02	Auckland Region	2.66774e+06	6.48201e+06	1	434000	1	894	8	1
2139400	105	573400	Mt Victoria West	4703	Lambton Ward	47	Wellington City	09	Wellington Region	2.65972e+06	5.98873e+06	1	2139400	5	971	37	2
435300	9	514102	Auckland Central West	704	Hobson Ward	7	Auckland City	02	Auckland Region	2.66739e+06	6.48148e+06	1	435300	5	958	3	2
435400	15	514102	Auckland Central West	704	Hobson Ward	7	Auckland City	02	Auckland Region	2.66729e+06	6.48134e+06	1	435400	5	958	5	2
2793900	57	599500	Seaview	6404	Timaru Ward	64	Timaru District	13	Canterbury Region	2.37027e+06	5.64423e+06	1	2793900	9	1092	26	3
434403	180	514102	Auckland Central West	704	Hobson Ward	7	Auckland City	02	Auckland Region	2.66712e+06	6.48171e+06	1	434403	7	1001	63	2
1482500	168	547900	Raureka	3005	Hastings Ward	30	Hastings District	06	Hawke's Bay Region	2.83878e+06	6.1658e+06	1	1482500	4	952	59	2
304200	9	507900	Westlake	502	Central Ward	5	North Shore City	02	Auckland Region	2.66797e+06	6.48822e+06	1	304200	5	968	3	2
433900	54	514102	Auckland Central West	704	Hobson Ward	7	Auckland City	02	Auckland Region	2.66767e+06	6.48208e+06	1	433900	1	894	18	1
2139100	33	573400	Mt Victoria West	4703	Lambton Ward	47	Wellington City	09	Wellington Region	2.65997e+06	5.98894e+06	1	2139100	3	933	11	1
1482700	162	547600	Mahora	3005	Hastings Ward	30	Hastings District	06	Hawke's Bay Region	2.84012e+06	6.16886e+06	1	1482700	10	1223	73	3
435100	48	514102	Auckland Central West	704	Hobson Ward	7	Auckland City	02	Auckland Region	2.66727e+06	6.48145e+06	1	435100	10	1353	22	3
565100	207	518600	Royal Oak	702	Avondale-Roskill Ward	7	Auckland City	02	Auckland Region	2.66765e+06	6.47553e+06	1	565100	2	913	68	1
565300	102	518600	Royal Oak	702	Avondale-Roskill Ward	7	Auckland City	02	Auckland Region	2.66801e+06	6.47552e+06	1	565300	3	921	34	1
565400	162	518600	Royal Oak	702	Avondale-Roskill Ward	7	Auckland City	02	Auckland Region	2.66799e+06	6.47538e+06	1	565400	5	963	57	2
435201	99	514102	Auckland Central West	704	Hobson Ward	7	Auckland City	02	Auckland Region	2.66756e+06	6.48153e+06	1	435201	9	1109	45	3
434500	213	514102	Auckland Central West	704	Hobson Ward	7	Auckland City	02	Auckland Region	2.66725e+06	6.4818e+06	1	434500	10	1204	96	3
434601	57	514102	Auckland Central West	704	Hobson Ward	7	Auckland City	02	Auckland Region	2.6672e+06	6.48178e+06	1	434601	8	1059	26	3
1483100	114	547600	Mahora	3005	Hastings Ward	30	Hastings District	06	Hawke's Bay Region	2.83982e+06	6.16864e+06	1	1483100	3	932	38	1
1482800	117	547600	Mahora	3005	Hastings Ward	30	Hastings District	06	Hawke's Bay Region	2.84015e+06	6.16872e+06	1	1482800	10	1324	53	3
959101	135	527501	Cambridge North	1703	Maungatautari Ward	17	Waipa District	03	Waikato Region	2.7288e+06	6.36589e+06	1	959101	1	888	45	1
2794600	102	599500	Seaview	6404	Timaru Ward	64	Timaru District	13	Canterbury Region	2.37001e+06	5.64383e+06	1	2794600	6	978	36	2
2794500	111	599500	Seaview	6404	Timaru Ward	64	Timaru District	13	Canterbury Region	2.36988e+06	5.64388e+06	1	2794500	9	1104	50	3
2794700	96	599500	Seaview	6404	Timaru Ward	64	Timaru District	13	Canterbury Region	2.37018e+06	5.64388e+06	1	2794700	7	1020	34	2
435000	189	514102	Auckland Central West	704	Hobson Ward	7	Auckland City	02	Auckland Region	2.66743e+06	6.48159e+06	1	435000	10	1353	85	3
2147700	114	573300	Mt Cook-Wallace Street	4703	Lambton Ward	47	Wellington City	09	Wellington Region	2.65848e+06	5.98739e+06	1	2147700	4	947	40	2
2139300	132	573400	Mt Victoria West	4703	Lambton Ward	47	Wellington City	09	Wellington Region	2.65984e+06	5.98883e+06	1	2139300	3	932	44	1
2138400	60	573400	Mt Victoria West	4703	Lambton Ward	47	Wellington City	09	Wellington Region	2.65984e+06	5.98904e+06	1	2138400	1	888	20	1
2137800	48	576600	Oriental Bay	4703	Lambton Ward	47	Wellington City	09	Wellington Region	2.66032e+06	5.98901e+06	1	2137800	1	885	16	1
696000	168	523401	Grange	802	Papatoetoe Ward	8	Manukau City	02	Auckland Region	2.67516e+06	6.46947e+06	1	696000	5	955	59	2
640300	129	520402	Hamlin	706	Tamaki-Maungakiekie Ward	7	Auckland City	02	Auckland Region	2.67421e+06	6.47511e+06	1	640300	6	999	45	2
303600	198	507900	Westlake	502	Central Ward	5	North Shore City	02	Auckland Region	2.66721e+06	6.48883e+06	1	303600	5	968	69	2
434101	204	514102	Auckland Central West	704	Hobson Ward	7	Auckland City	02	Auckland Region	2.66734e+06	6.48204e+06	1	434101	9	1102	92	3
2138500	108	573400	Mt Victoria West	4703	Lambton Ward	47	Wellington City	09	Wellington Region	2.65987e+06	5.98897e+06	1	2138500	3	930	36	1
434602	228	514102	Auckland Central West	704	Hobson Ward	7	Auckland City	02	Auckland Region	2.66724e+06	6.48171e+06	1	434602	8	1059	103	3
640400	87	520402	Hamlin	706	Tamaki-Maungakiekie Ward	7	Auckland City	02	Auckland Region	2.67434e+06	6.47509e+06	1	640400	8	1058	39	3
434802	81	514102	Auckland Central West	704	Hobson Ward	7	Auckland City	02	Auckland Region	2.66725e+06	6.48159e+06	1	434802	9	1130	36	3
565200	147	518600	Royal Oak	702	Avondale-Roskill Ward	7	Auckland City	02	Auckland Region	2.66782e+06	6.47551e+06	1	565200	4	952	51	2
2793800	114	599500	Seaview	6404	Timaru Ward	64	Timaru District	13	Canterbury Region	2.37003e+06	5.64426e+06	1	2793800	9	1095	51	3
434200	126	514102	Auckland Central West	704	Hobson Ward	7	Auckland City	02	Auckland Region	2.66746e+06	6.48192e+06	1	434200	9	1109	57	3
434801	66	514102	Auckland Central West	704	Hobson Ward	7	Auckland City	02	Auckland Region	2.66731e+06	6.48164e+06	1	434801	9	1130	30	3
2138000	84	576600	Oriental Bay	4703	Lambton Ward	47	Wellington City	09	Wellington Region	2.66004e+06	5.98896e+06	1	2138000	7	1006	29	2
2138100	120	576600	Oriental Bay	4703	Lambton Ward	47	Wellington City	09	Wellington Region	2.66012e+06	5.98901e+06	1	2138100	2	902	40	1
434701	123	514102	Auckland Central West	704	Hobson Ward	7	Auckland City	02	Auckland Region	2.66733e+06	6.48173e+06	1	434701	9	1130	55	3
2793600	6	599500	Seaview	6404	Timaru Ward	64	Timaru District	13	Canterbury Region	2.37107e+06	5.64404e+06	1	2793600	8	1061	3	3
2794000	102	599500	Seaview	6404	Timaru Ward	64	Timaru District	13	Canterbury Region	2.36988e+06	5.64407e+06	1	2794000	9	1092	46	3
565000	180	518600	Royal Oak	702	Avondale-Roskill Ward	7	Auckland City	02	Auckland Region	2.66807e+06	6.47569e+06	1	565000	3	919	59	1
435203	258	514102	Auckland Central West	704	Hobson Ward	7	Auckland City	02	Auckland Region	2.66741e+06	6.48132e+06	1	435203	9	1131	116	3
2137900	171	576600	Oriental Bay	4703	Lambton Ward	47	Wellington City	09	Wellington Region	2.65998e+06	5.98907e+06	1	2137900	3	921	56	1
434102	1431	514102	Auckland Central West	704	Hobson Ward	7	Auckland City	02	Auckland Region	2.66732e+06	6.48193e+06	1	434102	10	1189	644	3
434702	96	514102	Auckland Central West	704	Hobson Ward	7	Auckland City	02	Auckland Region	2.66731e+06	6.48174e+06	1	434702	9	1130	43	3
1482900	189	547600	Mahora	3005	Hastings Ward	30	Hastings District	06	Hawke's Bay Region	2.84028e+06	6.16876e+06	1	1482900	10	1293	85	3
959104	147	527501	Cambridge North	1703	Maungatautari Ward	17	Waipa District	03	Waikato Region	2.72898e+06	6.36589e+06	1	959104	1	878	49	1
438214	261	514101	Auckland Harbourside	704	Hobson Ward	7	Auckland City	02	Auckland Region	2.6689e+06	6.48228e+06	1	438214	6	982	91	2
2142300	75	573400	Mt Victoria West	4703	Lambton Ward	47	Wellington City	09	Wellington Region	2.65963e+06	5.98815e+06	1	2142300	5	956	26	2
2142600	99	573400	Mt Victoria West	4703	Lambton Ward	47	Wellington City	09	Wellington Region	2.65944e+06	5.98814e+06	1	2142600	5	962	35	2
2141600	81	573400	Mt Victoria West	4703	Lambton Ward	47	Wellington City	09	Wellington Region	2.65964e+06	5.9884e+06	1	2141600	5	957	28	2
1487000	219	547700	St Leonards	3005	Hastings Ward	30	Hastings District	06	Hawke's Bay Region	2.83879e+06	6.16714e+06	1	1487000	7	1005	77	2
1486000	99	547700	St Leonards	3005	Hastings Ward	30	Hastings District	06	Hawke's Bay Region	2.83895e+06	6.16782e+06	1	1486000	9	1078	45	3
1486300	153	547700	St Leonards	3005	Hastings Ward	30	Hastings District	06	Hawke's Bay Region	2.83946e+06	6.16785e+06	1	1486300	6	989	54	2
1486100	99	547700	St Leonards	3005	Hastings Ward	30	Hastings District	06	Hawke's Bay Region	2.83916e+06	6.16789e+06	1	1486100	10	1300	45	3
962500	186	527501	Cambridge North	1702	Cambridge Ward	17	Waipa District	03	Waikato Region	2.72718e+06	6.36564e+06	1	962500	3	927	61	1
961600	156	527501	Cambridge North	1702	Cambridge Ward	17	Waipa District	03	Waikato Region	2.72773e+06	6.36562e+06	1	961600	2	912	51	1
961500	147	527501	Cambridge North	1702	Cambridge Ward	17	Waipa District	03	Waikato Region	2.72751e+06	6.3656e+06	1	961500	5	960	51	2
962000	69	527503	Cambridge Central	1702	Cambridge Ward	17	Waipa District	03	Waikato Region	2.72832e+06	6.36566e+06	1	962000	6	977	24	2
2667000	102	592000	Aorangi	6001	Shirley-Papanui Ward	60	Christchurch City	13	Canterbury Region	2.4772e+06	5.74613e+06	1	2667000	4	936	36	2
2665400	165	591800	Northcote	6001	Shirley-Papanui Ward	60	Christchurch City	13	Canterbury Region	2.47889e+06	5.74705e+06	1	2665400	8	1060	74	3
438103	18	514101	Auckland Harbourside	704	Hobson Ward	7	Auckland City	02	Auckland Region	2.6682e+06	6.4826e+06	1	438103	8	1060	8	3
438408	327	514103	Auckland Central East	704	Hobson Ward	7	Auckland City	02	Auckland Region	2.66851e+06	6.48212e+06	1	438408	7	1030	114	2
2142200	72	573400	Mt Victoria West	4703	Lambton Ward	47	Wellington City	09	Wellington Region	2.65959e+06	5.98806e+06	1	2142200	5	956	25	2
2142700	21	573400	Mt Victoria West	4703	Lambton Ward	47	Wellington City	09	Wellington Region	2.65945e+06	5.98806e+06	1	2142700	5	962	7	2
1486400	72	547700	St Leonards	3005	Hastings Ward	30	Hastings District	06	Hawke's Bay Region	2.8393e+06	6.16773e+06	1	1486400	8	1067	32	3
1486600	15	547700	St Leonards	3005	Hastings Ward	30	Hastings District	06	Hawke's Bay Region	2.83873e+06	6.16775e+06	1	1486600	7	1008	5	2
438210	3	514101	Auckland Harbourside	704	Hobson Ward	7	Auckland City	02	Auckland Region	2.6686e+06	6.48262e+06	1	438210	6	982	1	2
438213	150	514101	Auckland Harbourside	704	Hobson Ward	7	Auckland City	02	Auckland Region	2.66846e+06	6.48248e+06	1	438213	5	956	52	2
438203	30	514103	Auckland Central East	704	Hobson Ward	7	Auckland City	02	Auckland Region	2.66862e+06	6.4819e+06	1	438203	8	1059	14	3
2666500	84	592000	Aorangi	6001	Shirley-Papanui Ward	60	Christchurch City	13	Canterbury Region	2.47727e+06	5.74575e+06	1	2666500	5	968	29	2
436400	291	514103	Auckland Central East	704	Hobson Ward	7	Auckland City	02	Auckland Region	2.66752e+06	6.4812e+06	1	436400	9	1132	131	3
436202	138	514103	Auckland Central East	704	Hobson Ward	7	Auckland City	02	Auckland Region	2.66762e+06	6.48133e+06	1	436202	10	1184	62	3
2140500	120	573400	Mt Victoria West	4703	Lambton Ward	47	Wellington City	09	Wellington Region	2.65957e+06	5.98853e+06	1	2140500	5	972	42	2
2141001	114	573400	Mt Victoria West	4703	Lambton Ward	47	Wellington City	09	Wellington Region	2.65982e+06	5.98851e+06	1	2141001	4	952	40	2
2139900	123	573400	Mt Victoria West	4703	Lambton Ward	47	Wellington City	09	Wellington Region	2.65954e+06	5.98876e+06	1	2139900	6	980	43	2
567100	87	518600	Royal Oak	706	Tamaki-Maungakiekie Ward	7	Auckland City	02	Auckland Region	2.66825e+06	6.47538e+06	1	567100	4	938	30	2
2139700	126	573400	Mt Victoria West	4703	Lambton Ward	47	Wellington City	09	Wellington Region	2.65941e+06	5.98869e+06	1	2139700	6	997	44	2
961300	132	527501	Cambridge North	1702	Cambridge Ward	17	Waipa District	03	Waikato Region	2.72793e+06	6.36609e+06	1	961300	6	991	46	2
961200	129	527501	Cambridge North	1702	Cambridge Ward	17	Waipa District	03	Waikato Region	2.72772e+06	6.36608e+06	1	961200	4	940	45	2
961400	234	527501	Cambridge North	1702	Cambridge Ward	17	Waipa District	03	Waikato Region	2.72828e+06	6.36609e+06	1	961400	4	946	82	2
961100	195	527501	Cambridge North	1702	Cambridge Ward	17	Waipa District	03	Waikato Region	2.72749e+06	6.366e+06	1	961100	5	954	68	2
437102	123	514103	Auckland Central East	704	Hobson Ward	7	Auckland City	02	Auckland Region	2.66789e+06	6.48199e+06	1	437102	8	1044	55	3
2664100	210	591800	Northcote	6001	Shirley-Papanui Ward	60	Christchurch City	13	Canterbury Region	2.47891e+06	5.74624e+06	1	2664100	7	1000	74	2
2664400	108	591800	Northcote	6001	Shirley-Papanui Ward	60	Christchurch City	13	Canterbury Region	2.47861e+06	5.74588e+06	1	2664400	8	1068	49	3
2664900	87	591800	Northcote	6001	Shirley-Papanui Ward	60	Christchurch City	13	Canterbury Region	2.47872e+06	5.74631e+06	1	2664900	6	984	30	2
2664700	282	591800	Northcote	6001	Shirley-Papanui Ward	60	Christchurch City	13	Canterbury Region	2.47829e+06	5.74665e+06	1	2664700	3	935	93	1
435600	282	514102	Auckland Central West	704	Hobson Ward	7	Auckland City	02	Auckland Region	2.66713e+06	6.48121e+06	1	435600	6	988	99	2
437101	42	514103	Auckland Central East	704	Hobson Ward	7	Auckland City	02	Auckland Region	2.66782e+06	6.48201e+06	1	437101	8	1044	19	3
2663800	3	591900	Papanui	6001	Shirley-Papanui Ward	60	Christchurch City	13	Canterbury Region	2.47826e+06	5.74569e+06	1	2663800	6	984	1	2
2795900	24	599500	Seaview	6404	Timaru Ward	64	Timaru District	13	Canterbury Region	2.37104e+06	5.64387e+06	1	2795900	10	1145	11	3
2795600	3	599500	Seaview	6404	Timaru Ward	64	Timaru District	13	Canterbury Region	2.37064e+06	5.64387e+06	1	2795600	10	1145	1	3
2795800	15	599500	Seaview	6404	Timaru Ward	64	Timaru District	13	Canterbury Region	2.37089e+06	5.64384e+06	1	2795800	10	1145	7	3
305202	3	507900	Westlake	502	Central Ward	5	North Shore City	02	Auckland Region	2.66694e+06	6.48934e+06	1	305202	2	916	1	1
2148100	48	576500	Adelaide	4703	Lambton Ward	47	Wellington City	09	Wellington Region	2.65902e+06	5.98779e+06	1	2148100	6	985	17	2
2140200	138	573400	Mt Victoria West	4703	Lambton Ward	47	Wellington City	09	Wellington Region	2.65962e+06	5.98886e+06	1	2140200	6	992	48	2
436300	315	514103	Auckland Central East	704	Hobson Ward	7	Auckland City	02	Auckland Region	2.66773e+06	6.48131e+06	1	436300	10	1202	142	3
1485000	132	547600	Mahora	3005	Hastings Ward	30	Hastings District	06	Hawke's Bay Region	2.83956e+06	6.16843e+06	1	1485000	6	992	46	2
436001	93	514102	Auckland Central West	701	Western Bays Ward	7	Auckland City	02	Auckland Region	2.6669e+06	6.48114e+06	1	436001	8	1062	42	3
2664200	90	591800	Northcote	6001	Shirley-Papanui Ward	60	Christchurch City	13	Canterbury Region	2.47879e+06	5.74609e+06	1	2664200	7	1019	31	2
437000	369	514103	Auckland Central East	704	Hobson Ward	7	Auckland City	02	Auckland Region	2.66784e+06	6.48143e+06	1	437000	10	1286	166	3
304600	129	507900	Westlake	502	Central Ward	5	North Shore City	02	Auckland Region	2.66743e+06	6.48907e+06	1	304600	5	973	45	2
2140700	126	573400	Mt Victoria West	4703	Lambton Ward	47	Wellington City	09	Wellington Region	2.65973e+06	5.98859e+06	1	2140700	5	961	44	2
2140400	78	573400	Mt Victoria West	4703	Lambton Ward	47	Wellington City	09	Wellington Region	2.6595e+06	5.9886e+06	1	2140400	8	1032	35	3
2140300	60	573400	Mt Victoria West	4703	Lambton Ward	47	Wellington City	09	Wellington Region	2.65938e+06	5.98859e+06	1	2140300	8	1032	27	3
1485100	138	547600	Mahora	3005	Hastings Ward	30	Hastings District	06	Hawke's Bay Region	2.83945e+06	6.1682e+06	1	1485100	8	1059	62	3
2664300	132	591800	Northcote	6001	Shirley-Papanui Ward	60	Christchurch City	13	Canterbury Region	2.47872e+06	5.74593e+06	1	2664300	5	955	46	2
2664000	165	591800	Northcote	6001	Shirley-Papanui Ward	60	Christchurch City	13	Canterbury Region	2.47902e+06	5.74639e+06	1	2664000	6	986	58	2
2665000	24	591800	Northcote	6001	Shirley-Papanui Ward	60	Christchurch City	13	Canterbury Region	2.47847e+06	5.74619e+06	1	2665000	6	984	8	2
436500	33	514103	Auckland Central East	704	Hobson Ward	7	Auckland City	02	Auckland Region	2.66763e+06	6.48116e+06	1	436500	9	1132	15	3
2794900	3	599500	Seaview	6404	Timaru Ward	64	Timaru District	13	Canterbury Region	2.37051e+06	5.64427e+06	1	2794900	10	1145	1	3
436801	138	514103	Auckland Central East	704	Hobson Ward	7	Auckland City	02	Auckland Region	2.66778e+06	6.4815e+06	1	436801	10	1296	62	3
2140800	129	573400	Mt Victoria West	4703	Lambton Ward	47	Wellington City	09	Wellington Region	2.65968e+06	5.98848e+06	1	2140800	6	995	45	2
2139500	87	573400	Mt Victoria West	4703	Lambton Ward	47	Wellington City	09	Wellington Region	2.65978e+06	5.98868e+06	1	2139500	5	961	30	2
2140002	123	573400	Mt Victoria West	4703	Lambton Ward	47	Wellington City	09	Wellington Region	2.65966e+06	5.98873e+06	1	2140002	7	1019	43	2
960001	195	527132	Hautapu	1703	Maungatautari Ward	17	Waipa District	03	Waikato Region	2.72513e+06	6.3659e+06	1	960001	4	939	68	2
959900	243	527132	Hautapu	1703	Maungatautari Ward	17	Waipa District	03	Waikato Region	2.72363e+06	6.36637e+06	1	959900	3	924	80	1
436802	408	514103	Auckland Central East	704	Hobson Ward	7	Auckland City	02	Auckland Region	2.66785e+06	6.48151e+06	1	436802	10	1222	184	3
436100	12	514103	Auckland Central East	704	Hobson Ward	7	Auckland City	02	Auckland Region	2.66767e+06	6.48151e+06	1	436100	8	1059	5	3
2664500	72	591800	Northcote	6001	Shirley-Papanui Ward	60	Christchurch City	13	Canterbury Region	2.47839e+06	5.74676e+06	1	2664500	7	1010	25	2
2664600	111	591800	Northcote	6001	Shirley-Papanui Ward	60	Christchurch City	13	Canterbury Region	2.47877e+06	5.74658e+06	1	2664600	7	1010	39	2
2795300	3	599500	Seaview	6404	Timaru Ward	64	Timaru District	13	Canterbury Region	2.37077e+06	5.64414e+06	1	2795300	10	1145	1	3
2795100	12	599500	Seaview	6404	Timaru Ward	64	Timaru District	13	Canterbury Region	2.37052e+06	5.64407e+06	1	2795100	10	1145	5	3
567000	138	518600	Royal Oak	706	Tamaki-Maungakiekie Ward	7	Auckland City	02	Auckland Region	2.66829e+06	6.47548e+06	1	567000	4	938	48	2
435801	15	514102	Auckland Central West	704	Hobson Ward	7	Auckland City	02	Auckland Region	2.66736e+06	6.48123e+06	1	435801	5	958	5	2
2139800	126	573400	Mt Victoria West	4703	Lambton Ward	47	Wellington City	09	Wellington Region	2.65953e+06	5.98868e+06	1	2139800	5	960	44	2
566900	159	518600	Royal Oak	706	Tamaki-Maungakiekie Ward	7	Auckland City	02	Auckland Region	2.66835e+06	6.4756e+06	1	566900	2	915	52	1
567600	192	518702	Hillsborough East	702	Avondale-Roskill Ward	7	Auckland City	02	Auckland Region	2.66786e+06	6.47524e+06	1	567600	4	947	67	2
960002	114	527502	Cambridge West	1703	Maungatautari Ward	17	Waipa District	03	Waikato Region	2.72588e+06	6.36535e+06	1	960002	6	988	40	2
435900	120	514102	Auckland Central West	704	Hobson Ward	7	Auckland City	02	Auckland Region	2.66748e+06	6.48132e+06	1	435900	5	958	42	2
436201	240	514103	Auckland Central East	704	Hobson Ward	7	Auckland City	02	Auckland Region	2.66758e+06	6.48136e+06	1	436201	10	1193	108	3
435802	378	514102	Auckland Central West	704	Hobson Ward	7	Auckland City	02	Auckland Region	2.66744e+06	6.48122e+06	1	435802	10	1230	170	3
1489200	90	548200	Hastings Central	3005	Hastings Ward	30	Hastings District	06	Hawke's Bay Region	2.83917e+06	6.16647e+06	1	1489200	5	957	31	2
1487700	114	547700	St Leonards	3005	Hastings Ward	30	Hastings District	06	Hawke's Bay Region	2.83914e+06	6.16708e+06	1	1487700	9	1116	51	3
963500	162	527502	Cambridge West	1702	Cambridge Ward	17	Waipa District	03	Waikato Region	2.72634e+06	6.36555e+06	1	963500	4	948	57	2
963800	87	527502	Cambridge West	1702	Cambridge Ward	17	Waipa District	03	Waikato Region	2.72694e+06	6.36558e+06	1	963800	3	933	29	1
963600	144	527502	Cambridge West	1702	Cambridge Ward	17	Waipa District	03	Waikato Region	2.72658e+06	6.36556e+06	1	963600	4	949	50	2
226108	93	513530	Royal Heights	601	Massey Ward	6	Waitakere City	02	Auckland Region	2.65524e+06	6.48347e+06	1	226108	8	1042	42	3
2668502	9	592000	Aorangi	6002	Fendalton-Waimairi Ward	60	Christchurch City	13	Canterbury Region	2.47646e+06	5.74507e+06	1	2668502	6	990	3	2
[truncated: 3,498 more rows]
