# Supplementary material for: Optimising locational access of deprived populations to farmers’ markets at a national scale: one route to improved fruit and vegetable consumption?
Source: PeerJ. 2013 Jul 2;1:e94. doi: 10.7717/peerj.94 (PMC3709110; doi:10.7717/peerj.94)
Supplement: Supplemental Information 7 [file peerj-01-94-s007.xlsx]

## Sheet: Pop_Scenario2_125kBuffer
MB2006	MBUR_POP20	CAU2006	CAU_DESCR	WARD_COD	WARD_DES	TA_CODE	TA_DESC	RC_COD	RC_DESC	POINT_X	POINT_Y	Cnt_MB2006	MB2006_1	NZDep2006	NZDep_scor	Weight	DepCat
2098000	75	574402	Ngaio	4702	Onslow-Western Ward	47	Wellington City	09	Wellington Region	2.65851e+06	5.99347e+06	1	2098000	1	879	25	1
2359603	105	581723	Saxton	5299	Area Outside Ward	52	Nelson City	17	Nelson Region	2.52847e+06	5.98779e+06	1	2359603	3	920	35	1
2359511	90	581723	Saxton	5299	Area Outside Ward	52	Nelson City	17	Nelson Region	2.52878e+06	5.9883e+06	1	2359511	4	942	31	2
2119200	45	572900	Thorndon-Tinakori Road	4703	Lambton Ward	47	Wellington City	09	Wellington Region	2.65901e+06	5.99091e+06	1	2119200	6	977	16	2
2622500	141	594600	Sydenham	6006	Spreydon-Heathcote Ward	60	Christchurch City	13	Canterbury Region	2.481e+06	5.73886e+06	1	2622500	7	1010	49	2
2621501	84	594600	Sydenham	6006	Spreydon-Heathcote Ward	60	Christchurch City	13	Canterbury Region	2.48086e+06	5.73956e+06	1	2621501	8	1062	38	3
2622702	87	594600	Sydenham	6006	Spreydon-Heathcote Ward	60	Christchurch City	13	Canterbury Region	2.4811e+06	5.73914e+06	1	2622702	9	1096	39	3
2621703	54	594600	Sydenham	6006	Spreydon-Heathcote Ward	60	Christchurch City	13	Canterbury Region	2.48094e+06	5.73921e+06	1	2621703	8	1054	24	3
2491700	225	587500	Hornby South	6004	Riccarton-Wigram Ward	60	Christchurch City	13	Canterbury Region	2.47231e+06	5.73968e+06	1	2491700	7	1016	79	2
2098200	189	574402	Ngaio	4702	Onslow-Western Ward	47	Wellington City	09	Wellington Region	2.65853e+06	5.99321e+06	1	2098200	1	868	62	1
2774604	159	599300	Gleniti	6404	Timaru Ward	64	Timaru District	13	Canterbury Region	2.36634e+06	5.64545e+06	1	2774604	1	868	52	1
1574400	141	551700	Westown	3301	New Plymouth City Ward	33	New Plymouth District	07	Taranaki Region	2.60254e+06	6.23701e+06	1	1574400	5	964	49	2
1573900	120	551700	Westown	3301	New Plymouth City Ward	33	New Plymouth District	07	Taranaki Region	2.60217e+06	6.23702e+06	1	1573900	7	1010	42	2
2490900	63	587500	Hornby South	6004	Riccarton-Wigram Ward	60	Christchurch City	13	Canterbury Region	2.47185e+06	5.73917e+06	1	2490900	5	974	22	2
786801	165	521801	Otahuhu North	706	Tamaki-Maungakiekie Ward	7	Auckland City	02	Auckland Region	2.67463e+06	6.47205e+06	1	786801	10	1145	74	3
786902	135	521801	Otahuhu North	706	Tamaki-Maungakiekie Ward	7	Auckland City	02	Auckland Region	2.67479e+06	6.47196e+06	1	786902	9	1123	61	3
2490700	111	587500	Hornby South	6004	Riccarton-Wigram Ward	60	Christchurch City	13	Canterbury Region	2.47223e+06	5.73935e+06	1	2490700	7	1019	39	2
2621502	96	594600	Sydenham	6006	Spreydon-Heathcote Ward	60	Christchurch City	13	Canterbury Region	2.4809e+06	5.73948e+06	1	2621502	8	1062	43	3
2623000	126	594600	Sydenham	6006	Spreydon-Heathcote Ward	60	Christchurch City	13	Canterbury Region	2.48135e+06	5.7394e+06	1	2623000	10	1154	57	3
2622900	159	594600	Sydenham	6006	Spreydon-Heathcote Ward	60	Christchurch City	13	Canterbury Region	2.48128e+06	5.73935e+06	1	2622900	9	1095	72	3
525500	333	517800	Mt Albert Central	703	Eden-Albert Ward	7	Auckland City	02	Auckland Region	2.6631e+06	6.47874e+06	1	525500	7	1001	117	2
2491800	207	587500	Hornby South	6004	Riccarton-Wigram Ward	60	Christchurch City	13	Canterbury Region	2.47222e+06	5.73959e+06	1	2491800	9	1073	93	3
2098501	57	574600	Wadestown	4703	Lambton Ward	47	Wellington City	09	Wellington Region	2.65902e+06	5.99265e+06	1	2098501	1	871	19	1
524700	258	517901	Springleigh	703	Eden-Albert Ward	7	Auckland City	02	Auckland Region	2.66292e+06	6.47806e+06	1	524700	7	1018	90	2
2097300	42	574402	Ngaio	4702	Onslow-Western Ward	47	Wellington City	09	Wellington Region	2.65925e+06	5.99335e+06	1	2097300	2	904	14	1
2098100	276	574402	Ngaio	4702	Onslow-Western Ward	47	Wellington City	09	Wellington Region	2.65832e+06	5.99318e+06	1	2098100	1	893	91	1
2097504	33	574402	Ngaio	4702	Onslow-Western Ward	47	Wellington City	09	Wellington Region	2.65916e+06	5.99331e+06	1	2097504	1	877	11	1
2359407	15	581723	Saxton	5299	Area Outside Ward	52	Nelson City	17	Nelson Region	2.52762e+06	5.98664e+06	1	2359407	4	940	5	2
2119100	6	572900	Thorndon-Tinakori Road	4703	Lambton Ward	47	Wellington City	09	Wellington Region	2.6591e+06	5.99085e+06	1	2119100	6	977	2	2
787900	24	521802	Fairburn	706	Tamaki-Maungakiekie Ward	7	Auckland City	02	Auckland Region	2.67497e+06	6.47149e+06	1	787900	10	1152	11	3
2622300	135	594600	Sydenham	6006	Spreydon-Heathcote Ward	60	Christchurch City	13	Canterbury Region	2.48105e+06	5.73904e+06	1	2622300	8	1072	61	3
786802	189	521801	Otahuhu North	706	Tamaki-Maungakiekie Ward	7	Auckland City	02	Auckland Region	2.67465e+06	6.47191e+06	1	786802	10	1188	85	3
2490800	108	587500	Hornby South	6004	Riccarton-Wigram Ward	60	Christchurch City	13	Canterbury Region	2.47207e+06	5.73927e+06	1	2490800	2	916	36	1
2490500	66	587500	Hornby South	6004	Riccarton-Wigram Ward	60	Christchurch City	13	Canterbury Region	2.47182e+06	5.73936e+06	1	2490500	6	985	23	2
2621602	69	594600	Sydenham	6006	Spreydon-Heathcote Ward	60	Christchurch City	13	Canterbury Region	2.48097e+06	5.73935e+06	1	2621602	8	1067	31	3
394300	120	515002	Point Chevalier East	701	Western Bays Ward	7	Auckland City	02	Auckland Region	2.66248e+06	6.48166e+06	1	394300	1	898	40	1
2097400	69	574402	Ngaio	4702	Onslow-Western Ward	47	Wellington City	09	Wellington Region	2.65866e+06	5.99325e+06	1	2097400	1	877	23	1
525200	159	517800	Mt Albert Central	703	Eden-Albert Ward	7	Auckland City	02	Auckland Region	2.66349e+06	6.47909e+06	1	525200	5	973	56	2
2359601	162	581723	Saxton	5299	Area Outside Ward	52	Nelson City	17	Nelson Region	2.52868e+06	5.98777e+06	1	2359601	5	961	57	2
2359512	99	581723	Saxton	5299	Area Outside Ward	52	Nelson City	17	Nelson Region	2.52862e+06	5.98822e+06	1	2359512	2	915	33	1
1203203	105	536810	Mt Maunganui North	2301	Mount Maunganui-Papamoa Ward	23	Tauranga City	04	Bay of Plenty Region	2.79154e+06	6.38985e+06	1	1203203	8	1066	47	3
787400	336	521801	Otahuhu North	706	Tamaki-Maungakiekie Ward	7	Auckland City	02	Auckland Region	2.67489e+06	6.47175e+06	1	787400	9	1131	151	3
2622802	63	594600	Sydenham	6006	Spreydon-Heathcote Ward	60	Christchurch City	13	Canterbury Region	2.48116e+06	5.73926e+06	1	2622802	7	1030	22	2
2097601	204	574402	Ngaio	4702	Onslow-Western Ward	47	Wellington City	09	Wellington Region	2.65872e+06	5.99305e+06	1	2097601	1	874	67	1
2097900	9	574402	Ngaio	4702	Onslow-Western Ward	47	Wellington City	09	Wellington Region	2.65799e+06	5.99291e+06	1	2097900	1	879	3	1
525400	132	517800	Mt Albert Central	703	Eden-Albert Ward	7	Auckland City	02	Auckland Region	2.66336e+06	6.47873e+06	1	525400	4	940	46	2
525000	108	517800	Mt Albert Central	703	Eden-Albert Ward	7	Auckland City	02	Auckland Region	2.66359e+06	6.47932e+06	1	525000	3	930	36	1
2097700	3	574402	Ngaio	4702	Onslow-Western Ward	47	Wellington City	09	Wellington Region	2.65849e+06	5.99354e+06	1	2097700	1	879	1	1
394200	123	515002	Point Chevalier East	701	Western Bays Ward	7	Auckland City	02	Auckland Region	2.66237e+06	6.48174e+06	1	394200	3	926	41	1
525700	156	517800	Mt Albert Central	703	Eden-Albert Ward	7	Auckland City	02	Auckland Region	2.66326e+06	6.47849e+06	1	525700	8	1046	70	3
1574500	120	551700	Westown	3301	New Plymouth City Ward	33	New Plymouth District	07	Taranaki Region	2.60244e+06	6.23683e+06	1	1574500	9	1104	54	3
1574100	87	551700	Westown	3301	New Plymouth City Ward	33	New Plymouth District	07	Taranaki Region	2.60259e+06	6.23722e+06	1	1574100	7	1000	30	2
525900	90	517800	Mt Albert Central	703	Eden-Albert Ward	7	Auckland City	02	Auckland Region	2.66404e+06	6.4795e+06	1	525900	6	984	31	2
787300	99	521801	Otahuhu North	706	Tamaki-Maungakiekie Ward	7	Auckland City	02	Auckland Region	2.67471e+06	6.4717e+06	1	787300	10	1152	45	3
2490400	96	587500	Hornby South	6004	Riccarton-Wigram Ward	60	Christchurch City	13	Canterbury Region	2.47199e+06	5.7395e+06	1	2490400	6	989	34	2
2622701	78	594600	Sydenham	6006	Spreydon-Heathcote Ward	60	Christchurch City	13	Canterbury Region	2.48116e+06	5.7392e+06	1	2622701	9	1096	35	3
2098602	33	574600	Wadestown	4703	Lambton Ward	47	Wellington City	09	Wellington Region	2.65937e+06	5.9926e+06	1	2098602	1	871	11	1
2491600	192	587500	Hornby South	6004	Riccarton-Wigram Ward	60	Christchurch City	13	Canterbury Region	2.47243e+06	5.73973e+06	1	2491600	7	1012	67	2
525600	153	517800	Mt Albert Central	703	Eden-Albert Ward	7	Auckland City	02	Auckland Region	2.66317e+06	6.47858e+06	1	525600	8	1032	69	3
524300	225	517901	Springleigh	703	Eden-Albert Ward	7	Auckland City	02	Auckland Region	2.66297e+06	6.47846e+06	1	524300	6	984	79	2
2359510	36	581723	Saxton	5299	Area Outside Ward	52	Nelson City	17	Nelson Region	2.52891e+06	5.98836e+06	1	2359510	4	942	13	2
393800	135	515001	Point Chevalier West	701	Western Bays Ward	7	Auckland City	02	Auckland Region	2.66238e+06	6.48057e+06	1	393800	5	965	47	2
524400	69	517901	Springleigh	703	Eden-Albert Ward	7	Auckland City	02	Auckland Region	2.66307e+06	6.47837e+06	1	524400	7	1017	24	2
786901	189	521801	Otahuhu North	706	Tamaki-Maungakiekie Ward	7	Auckland City	02	Auckland Region	2.67485e+06	6.47206e+06	1	786901	10	1185	85	3
525100	75	517800	Mt Albert Central	703	Eden-Albert Ward	7	Auckland City	02	Auckland Region	2.66354e+06	6.47923e+06	1	525100	4	940	26	2
2491402	57	587500	Hornby South	6004	Riccarton-Wigram Ward	60	Christchurch City	13	Canterbury Region	2.47191e+06	5.7399e+06	1	2491402	8	1054	26	3
2097200	120	574402	Ngaio	4702	Onslow-Western Ward	47	Wellington City	09	Wellington Region	2.65895e+06	5.99331e+06	1	2097200	1	882	40	1
525800	117	517800	Mt Albert Central	703	Eden-Albert Ward	7	Auckland City	02	Auckland Region	2.664e+06	6.47954e+06	1	525800	6	984	41	2
2359605	213	581723	Saxton	5299	Area Outside Ward	52	Nelson City	17	Nelson Region	2.52828e+06	5.98728e+06	1	2359605	2	917	70	1
394400	183	515001	Point Chevalier West	701	Western Bays Ward	7	Auckland City	02	Auckland Region	2.66225e+06	6.48145e+06	1	394400	5	969	64	2
394800	69	515002	Point Chevalier East	701	Western Bays Ward	7	Auckland City	02	Auckland Region	2.66262e+06	6.48144e+06	1	394800	4	937	24	2
524900	81	517800	Mt Albert Central	703	Eden-Albert Ward	7	Auckland City	02	Auckland Region	2.66366e+06	6.47939e+06	1	524900	5	973	28	2
2491100	102	587500	Hornby South	6004	Riccarton-Wigram Ward	60	Christchurch City	13	Canterbury Region	2.47213e+06	5.73909e+06	1	2491100	5	974	36	2
2622803	63	594600	Sydenham	6006	Spreydon-Heathcote Ward	60	Christchurch City	13	Canterbury Region	2.48135e+06	5.73913e+06	1	2622803	7	1030	22	2
2621900	114	594600	Sydenham	6006	Spreydon-Heathcote Ward	60	Christchurch City	13	Canterbury Region	2.48052e+06	5.73919e+06	1	2621900	9	1120	51	3
2491000	132	587500	Hornby South	6004	Riccarton-Wigram Ward	60	Christchurch City	13	Canterbury Region	2.47197e+06	5.73906e+06	1	2491000	3	933	44	1
2621601	63	594600	Sydenham	6006	Spreydon-Heathcote Ward	60	Christchurch City	13	Canterbury Region	2.4808e+06	5.73944e+06	1	2621601	8	1067	28	3
2621503	87	594600	Sydenham	6006	Spreydon-Heathcote Ward	60	Christchurch City	13	Canterbury Region	2.48105e+06	5.7394e+06	1	2621503	8	1062	39	3
525300	108	517800	Mt Albert Central	703	Eden-Albert Ward	7	Auckland City	02	Auckland Region	2.66337e+06	6.47884e+06	1	525300	2	913	36	1
524500	105	517901	Springleigh	703	Eden-Albert Ward	7	Auckland City	02	Auckland Region	2.66311e+06	6.47831e+06	1	524500	7	1017	37	2
2359707	222	581715	Ngawhatu	5299	Area Outside Ward	52	Nelson City	17	Nelson Region	2.52838e+06	5.98688e+06	1	2359707	3	928	73	1
1574300	111	551700	Westown	3301	New Plymouth City Ward	33	New Plymouth District	07	Taranaki Region	2.6023e+06	6.23687e+06	1	1574300	7	1025	39	2
787800	117	521802	Fairburn	706	Tamaki-Maungakiekie Ward	7	Auckland City	02	Auckland Region	2.67477e+06	6.47147e+06	1	787800	10	1165	53	3
2622703	84	594600	Sydenham	6006	Spreydon-Heathcote Ward	60	Christchurch City	13	Canterbury Region	2.48128e+06	5.73902e+06	1	2622703	9	1096	38	3
1203205	87	536810	Mt Maunganui North	2301	Mount Maunganui-Papamoa Ward	23	Tauranga City	04	Bay of Plenty Region	2.79167e+06	6.38995e+06	1	1203205	9	1110	39	3
2621701	168	594600	Sydenham	6006	Spreydon-Heathcote Ward	60	Christchurch City	13	Canterbury Region	2.48076e+06	5.73934e+06	1	2621701	8	1054	76	3
2490600	132	587500	Hornby South	6004	Riccarton-Wigram Ward	60	Christchurch City	13	Canterbury Region	2.47172e+06	5.73929e+06	1	2490600	6	984	46	2
2621603	84	594600	Sydenham	6006	Spreydon-Heathcote Ward	60	Christchurch City	13	Canterbury Region	2.48089e+06	5.73934e+06	1	2621603	8	1067	38	3
2622801	75	594600	Sydenham	6006	Spreydon-Heathcote Ward	60	Christchurch City	13	Canterbury Region	2.48123e+06	5.7393e+06	1	2622801	7	1030	26	2
786600	84	521801	Otahuhu North	706	Tamaki-Maungakiekie Ward	7	Auckland City	02	Auckland Region	2.67477e+06	6.4722e+06	1	786600	10	1145	38	3
2097503	60	574402	Ngaio	4702	Onslow-Western Ward	47	Wellington City	09	Wellington Region	2.65919e+06	5.99312e+06	1	2097503	1	877	20	1
2359509	63	581723	Saxton	5299	Area Outside Ward	52	Nelson City	17	Nelson Region	2.52844e+06	5.98817e+06	1	2359509	4	945	22	2
394700	153	515002	Point Chevalier East	701	Western Bays Ward	7	Auckland City	02	Auckland Region	2.66243e+06	6.48151e+06	1	394700	4	943	54	2
2622600	192	594600	Sydenham	6006	Spreydon-Heathcote Ward	60	Christchurch City	13	Canterbury Region	2.48121e+06	5.73888e+06	1	2622600	6	989	67	2
524600	318	517901	Springleigh	703	Eden-Albert Ward	7	Auckland City	02	Auckland Region	2.6629e+06	6.4782e+06	1	524600	6	995	111	2
2097502	45	574402	Ngaio	4702	Onslow-Western Ward	47	Wellington City	09	Wellington Region	2.6593e+06	5.99292e+06	1	2097502	1	877	15	1
2624401	132	594500	Waltham	6005	Hagley-Ferrymead Ward	60	Christchurch City	13	Canterbury Region	2.48165e+06	5.74004e+06	1	2624401	9	1130	59	3
2362000	237	584201	Richmond East	5105	Richmond Ward	51	Tasman District	16	Tasman Region	2.52595e+06	5.98497e+06	1	2362000	7	1022	83	2
264800	132	511402	Rewarewa	604	New Lynn Ward	6	Waitakere City	02	Auckland Region	2.66056e+06	6.47471e+06	1	264800	6	998	46	2
395900	132	515002	Point Chevalier East	701	Western Bays Ward	7	Auckland City	02	Auckland Region	2.66278e+06	6.48067e+06	1	395900	5	958	46	2
789200	144	521802	Fairburn	706	Tamaki-Maungakiekie Ward	7	Auckland City	02	Auckland Region	2.67526e+06	6.47087e+06	1	789200	9	1131	65	3
2623200	126	594600	Sydenham	6006	Spreydon-Heathcote Ward	60	Christchurch City	13	Canterbury Region	2.48152e+06	5.73918e+06	1	2623200	6	988	44	2
2624502	78	594500	Waltham	6006	Spreydon-Heathcote Ward	60	Christchurch City	13	Canterbury Region	2.48173e+06	5.73981e+06	1	2624502	9	1092	35	3
526000	186	517800	Mt Albert Central	703	Eden-Albert Ward	7	Auckland City	02	Auckland Region	2.66414e+06	6.47936e+06	1	526000	6	979	65	2
2362200	153	584201	Richmond East	5105	Richmond Ward	51	Tasman District	16	Tasman Region	2.52613e+06	5.98486e+06	1	2362200	6	984	54	2
526400	120	517800	Mt Albert Central	703	Eden-Albert Ward	7	Auckland City	02	Auckland Region	2.66358e+06	6.479e+06	1	526400	6	994	42	2
526700	81	517800	Mt Albert Central	703	Eden-Albert Ward	7	Auckland City	02	Auckland Region	2.66403e+06	6.47894e+06	1	526700	6	994	28	2
395300	123	515002	Point Chevalier East	701	Western Bays Ward	7	Auckland City	02	Auckland Region	2.66262e+06	6.4811e+06	1	395300	1	897	41	1
789600	213	521802	Fairburn	706	Tamaki-Maungakiekie Ward	7	Auckland City	02	Auckland Region	2.67499e+06	6.47038e+06	1	789600	9	1115	96	3
789500	174	521802	Fairburn	706	Tamaki-Maungakiekie Ward	7	Auckland City	02	Auckland Region	2.67498e+06	6.4706e+06	1	789500	9	1110	78	3
788602	192	521802	Fairburn	706	Tamaki-Maungakiekie Ward	7	Auckland City	02	Auckland Region	2.67503e+06	6.4712e+06	1	788602	8	1068	86	3
526500	150	517800	Mt Albert Central	703	Eden-Albert Ward	7	Auckland City	02	Auckland Region	2.66379e+06	6.47894e+06	1	526500	2	915	50	1
2099300	183	574600	Wadestown	4703	Lambton Ward	47	Wellington City	09	Wellington Region	2.65931e+06	5.99226e+06	1	2099300	2	905	60	1
2624000	3	594500	Waltham	6005	Hagley-Ferrymead Ward	60	Christchurch City	13	Canterbury Region	2.48161e+06	5.74022e+06	1	2624000	8	1049	1	3
2361700	105	584201	Richmond East	5105	Richmond Ward	51	Tasman District	16	Tasman Region	2.52581e+06	5.98527e+06	1	2361700	7	1020	37	2
395600	156	515002	Point Chevalier East	701	Western Bays Ward	7	Auckland City	02	Auckland Region	2.66279e+06	6.48087e+06	1	395600	4	953	55	2
1706700	54	557200	St Johns Hill	3702	Urban Ward	37	Wanganui District	08	Manawatu-Wanganui Region	2.68422e+06	6.1409e+06	1	1706700	1	887	18	1
2359604	90	581723	Saxton	5299	Area Outside Ward	52	Nelson City	17	Nelson Region	2.52862e+06	5.98763e+06	1	2359604	3	920	30	1
526801	42	517800	Mt Albert Central	703	Eden-Albert Ward	7	Auckland City	02	Auckland Region	2.66415e+06	6.47961e+06	1	526801	6	992	15	2
2512601	156	588200	Styx Mill	6001	Shirley-Papanui Ward	60	Christchurch City	13	Canterbury Region	2.4789e+06	5.74785e+06	1	2512601	9	1128	70	3
2362300	105	584201	Richmond East	5105	Richmond Ward	51	Tasman District	16	Tasman Region	2.52603e+06	5.98472e+06	1	2362300	8	1055	47	3
2361400	108	584201	Richmond East	5105	Richmond Ward	51	Tasman District	16	Tasman Region	2.52562e+06	5.98558e+06	1	2361400	8	1053	49	3
1705700	72	557200	St Johns Hill	3702	Urban Ward	37	Wanganui District	08	Manawatu-Wanganui Region	2.6841e+06	6.14078e+06	1	1705700	1	887	24	1
527200	153	517800	Mt Albert Central	703	Eden-Albert Ward	7	Auckland City	02	Auckland Region	2.66347e+06	6.4786e+06	1	527200	6	980	54	2
396200	141	515002	Point Chevalier East	701	Western Bays Ward	7	Auckland City	02	Auckland Region	2.6629e+06	6.48032e+06	1	396200	6	989	49	2
396100	159	515002	Point Chevalier East	701	Western Bays Ward	7	Auckland City	02	Auckland Region	2.66298e+06	6.4804e+06	1	396100	6	995	56	2
2119300	105	572900	Thorndon-Tinakori Road	4703	Lambton Ward	47	Wellington City	09	Wellington Region	2.65891e+06	5.9911e+06	1	2119300	7	1016	37	2
395500	114	515002	Point Chevalier East	701	Western Bays Ward	7	Auckland City	02	Auckland Region	2.66269e+06	6.48098e+06	1	395500	6	988	40	2
2624501	36	594500	Waltham	6005	Hagley-Ferrymead Ward	60	Christchurch City	13	Canterbury Region	2.48176e+06	5.73994e+06	1	2624501	9	1092	16	3
265300	120	511303	Lynnmall	604	New Lynn Ward	6	Waitakere City	02	Auckland Region	2.66091e+06	6.47506e+06	1	265300	8	1066	54	3
396400	87	515002	Point Chevalier East	701	Western Bays Ward	7	Auckland City	02	Auckland Region	2.66316e+06	6.4801e+06	1	396400	7	1019	30	2
2362100	126	584201	Richmond East	5105	Richmond Ward	51	Tasman District	16	Tasman Region	2.52623e+06	5.98504e+06	1	2362100	7	1018	44	2
2361800	195	584201	Richmond East	5105	Richmond Ward	51	Tasman District	16	Tasman Region	2.52595e+06	5.9854e+06	1	2361800	6	990	68	2
527400	216	517800	Mt Albert Central	703	Eden-Albert Ward	7	Auckland City	02	Auckland Region	2.6639e+06	6.4785e+06	1	527400	5	958	76	2
789300	141	521802	Fairburn	706	Tamaki-Maungakiekie Ward	7	Auckland City	02	Auckland Region	2.67488e+06	6.47093e+06	1	789300	10	1186	63	3
265200	3	511303	Lynnmall	604	New Lynn Ward	6	Waitakere City	02	Auckland Region	2.66101e+06	6.47552e+06	1	265200	8	1066	1	3
2099100	177	574600	Wadestown	4703	Lambton Ward	47	Wellington City	09	Wellington Region	2.65956e+06	5.99249e+06	1	2099100	2	909	58	1
396000	144	515002	Point Chevalier East	701	Western Bays Ward	7	Auckland City	02	Auckland Region	2.66266e+06	6.48056e+06	1	396000	4	940	50	2
2624200	159	594500	Waltham	6005	Hagley-Ferrymead Ward	60	Christchurch City	13	Canterbury Region	2.48185e+06	5.74e+06	1	2624200	9	1090	72	3
2361100	6	584201	Richmond East	5105	Richmond Ward	51	Tasman District	16	Tasman Region	2.52585e+06	5.98597e+06	1	2361100	8	1033	3	3
265000	348	511303	Lynnmall	604	New Lynn Ward	6	Waitakere City	02	Auckland Region	2.66065e+06	6.47519e+06	1	265000	9	1087	157	3
2359704	135	581715	Ngawhatu	5299	Area Outside Ward	52	Nelson City	17	Nelson Region	2.52887e+06	5.98733e+06	1	2359704	1	865	45	1
394900	168	515002	Point Chevalier East	701	Western Bays Ward	7	Auckland City	02	Auckland Region	2.66247e+06	6.48136e+06	1	394900	4	937	59	2
2512604	159	588200	Styx Mill	6001	Shirley-Papanui Ward	60	Christchurch City	13	Canterbury Region	2.4789e+06	5.74758e+06	1	2512604	9	1099	72	3
2099901	21	574600	Wadestown	4703	Lambton Ward	47	Wellington City	09	Wellington Region	2.65893e+06	5.99279e+06	1	2099901	2	909	7	1
2624602	39	594500	Waltham	6006	Spreydon-Heathcote Ward	60	Christchurch City	13	Canterbury Region	2.48186e+06	5.73978e+06	1	2624602	10	1143	18	3
526802	30	517800	Mt Albert Central	703	Eden-Albert Ward	7	Auckland City	02	Auckland Region	2.66427e+06	6.47956e+06	1	526802	6	992	10	2
527500	57	517800	Mt Albert Central	703	Eden-Albert Ward	7	Auckland City	02	Auckland Region	2.66337e+06	6.47843e+06	1	527500	6	983	20	2
2624100	3	594500	Waltham	6005	Hagley-Ferrymead Ward	60	Christchurch City	13	Canterbury Region	2.48189e+06	5.74013e+06	1	2624100	9	1090	1	3
2361600	57	584201	Richmond East	5105	Richmond Ward	51	Tasman District	16	Tasman Region	2.52573e+06	5.98513e+06	1	2361600	7	1017	20	2
1376604	336	544900	Riverdale	2807	Gisborne Ward	28	Gisborne District	05	Gisborne Region	2.94469e+06	6.27252e+06	1	1376604	1	898	111	1
526600	213	517800	Mt Albert Central	703	Eden-Albert Ward	7	Auckland City	02	Auckland Region	2.66399e+06	6.47882e+06	1	526600	5	973	75	2
527000	105	517800	Mt Albert Central	703	Eden-Albert Ward	7	Auckland City	02	Auckland Region	2.66385e+06	6.4787e+06	1	527000	9	1098	47	3
526900	186	517800	Mt Albert Central	703	Eden-Albert Ward	7	Auckland City	02	Auckland Region	2.66362e+06	6.47878e+06	1	526900	6	980	65	2
395100	225	515002	Point Chevalier East	701	Western Bays Ward	7	Auckland City	02	Auckland Region	2.66258e+06	6.48125e+06	1	395100	1	890	74	1
526200	246	517800	Mt Albert Central	703	Eden-Albert Ward	7	Auckland City	02	Auckland Region	2.66395e+06	6.47919e+06	1	526200	7	1011	86	2
395400	189	515002	Point Chevalier East	701	Western Bays Ward	7	Auckland City	02	Auckland Region	2.66244e+06	6.48086e+06	1	395400	5	960	66	2
789400	273	521802	Fairburn	706	Tamaki-Maungakiekie Ward	7	Auckland City	02	Auckland Region	2.67481e+06	6.47068e+06	1	789400	9	1098	123	3
788601	189	521802	Fairburn	706	Tamaki-Maungakiekie Ward	7	Auckland City	02	Auckland Region	2.67479e+06	6.47117e+06	1	788601	10	1415	85	3
395700	192	515002	Point Chevalier East	701	Western Bays Ward	7	Auckland City	02	Auckland Region	2.66253e+06	6.48072e+06	1	395700	5	967	67	2
395000	99	515002	Point Chevalier East	701	Western Bays Ward	7	Auckland City	02	Auckland Region	2.6623e+06	6.48124e+06	1	395000	1	897	33	1
526300	117	517800	Mt Albert Central	703	Eden-Albert Ward	7	Auckland City	02	Auckland Region	2.66372e+06	6.47911e+06	1	526300	7	1013	41	2
265100	6	511303	Lynnmall	604	New Lynn Ward	6	Waitakere City	02	Auckland Region	2.66079e+06	6.47558e+06	1	265100	8	1066	3	3
1485800	153	547700	St Leonards	3005	Hastings Ward	30	Hastings District	06	Hawke's Bay Region	2.83925e+06	6.16817e+06	1	1485800	10	1176	69	3
2623300	234	594600	Sydenham	6006	Spreydon-Heathcote Ward	60	Christchurch City	13	Canterbury Region	2.48143e+06	5.73892e+06	1	2623300	9	1083	105	3
2623100	69	594600	Sydenham	6006	Spreydon-Heathcote Ward	60	Christchurch City	13	Canterbury Region	2.48163e+06	5.73929e+06	1	2623100	6	988	24	2
526100	117	517800	Mt Albert Central	703	Eden-Albert Ward	7	Auckland City	02	Auckland Region	2.66381e+06	6.47932e+06	1	526100	2	900	39	1
527300	192	517800	Mt Albert Central	703	Eden-Albert Ward	7	Auckland City	02	Auckland Region	2.6637e+06	6.47861e+06	1	527300	8	1054	86	3
2624301	78	594500	Waltham	6005	Hagley-Ferrymead Ward	60	Christchurch City	13	Canterbury Region	2.48156e+06	5.74008e+06	1	2624301	10	1145	35	3
2361300	51	584201	Richmond East	5105	Richmond Ward	51	Tasman District	16	Tasman Region	2.52545e+06	5.98547e+06	1	2361300	8	1053	23	3
2361500	162	584201	Richmond East	5105	Richmond Ward	51	Tasman District	16	Tasman Region	2.52579e+06	5.9855e+06	1	2361500	8	1059	73	3
396300	171	515002	Point Chevalier East	701	Western Bays Ward	7	Auckland City	02	Auckland Region	2.66281e+06	6.48027e+06	1	396300	4	936	60	2
395200	132	515002	Point Chevalier East	701	Western Bays Ward	7	Auckland City	02	Auckland Region	2.66232e+06	6.48106e+06	1	395200	4	946	46	2
527100	123	517800	Mt Albert Central	703	Eden-Albert Ward	7	Auckland City	02	Auckland Region	2.66408e+06	6.47863e+06	1	527100	6	992	43	2
789100	234	521802	Fairburn	706	Tamaki-Maungakiekie Ward	7	Auckland City	02	Auckland Region	2.67507e+06	6.47084e+06	1	789100	9	1075	105	3
2624402	63	594500	Waltham	6006	Spreydon-Heathcote Ward	60	Christchurch City	13	Canterbury Region	2.4816e+06	5.73984e+06	1	2624402	9	1130	28	3
2624302	48	594500	Waltham	6006	Spreydon-Heathcote Ward	60	Christchurch City	13	Canterbury Region	2.48153e+06	5.73987e+06	1	2624302	10	1145	22	3
2624601	30	594500	Waltham	6005	Hagley-Ferrymead Ward	60	Christchurch City	13	Canterbury Region	2.48191e+06	5.7399e+06	1	2624601	10	1143	14	3
529800	105	517500	Kingsland	703	Eden-Albert Ward	7	Auckland City	02	Auckland Region	2.66604e+06	6.47969e+06	1	529800	10	1163	47	3
2366107	27	584202	Richmond West	5105	Richmond Ward	51	Tasman District	16	Tasman Region	2.52555e+06	5.98466e+06	1	2366107	1	890	9	1
2365711	165	584202	Richmond West	5105	Richmond Ward	51	Tasman District	16	Tasman Region	2.52429e+06	5.98453e+06	1	2365711	4	940	58	2
2365001	33	584202	Richmond West	5105	Richmond Ward	51	Tasman District	16	Tasman Region	2.52462e+06	5.98505e+06	1	2365001	7	1001	12	2
2365002	108	584202	Richmond West	5105	Richmond Ward	51	Tasman District	16	Tasman Region	2.5247e+06	5.98497e+06	1	2365002	7	1001	38	2
2363205	258	584201	Richmond East	5105	Richmond Ward	51	Tasman District	16	Tasman Region	2.52689e+06	5.9856e+06	1	2363205	1	897	85	1
659400	102	524601	Manukau Central	802	Papatoetoe Ward	8	Manukau City	02	Auckland Region	2.67511e+06	6.46617e+06	1	659400	9	1113	46	3
660200	195	522100	Papatoetoe West	802	Papatoetoe Ward	8	Manukau City	02	Auckland Region	2.67503e+06	6.46631e+06	1	660200	7	1027	68	2
528000	111	517800	Mt Albert Central	703	Eden-Albert Ward	7	Auckland City	02	Auckland Region	2.66435e+06	6.47868e+06	1	528000	9	1095	50	3
397500	63	515002	Point Chevalier East	701	Western Bays Ward	7	Auckland City	02	Auckland Region	2.66346e+06	6.48026e+06	1	397500	3	935	21	1
2626400	126	594400	St Martins	6006	Spreydon-Heathcote Ward	60	Christchurch City	13	Canterbury Region	2.48228e+06	5.73846e+06	1	2626400	3	930	42	1
2625100	174	594400	St Martins	6006	Spreydon-Heathcote Ward	60	Christchurch City	13	Canterbury Region	2.48181e+06	5.73876e+06	1	2625100	3	920	57	1
397400	108	515002	Point Chevalier East	701	Western Bays Ward	7	Auckland City	02	Auckland Region	2.66354e+06	6.48019e+06	1	397400	3	935	36	1
527600	81	517800	Mt Albert Central	703	Eden-Albert Ward	7	Auckland City	02	Auckland Region	2.66362e+06	6.47844e+06	1	527600	6	983	28	2
2625500	93	594400	St Martins	6006	Spreydon-Heathcote Ward	60	Christchurch City	13	Canterbury Region	2.48214e+06	5.73845e+06	1	2625500	3	920	31	1
2624900	180	594400	St Martins	6006	Spreydon-Heathcote Ward	60	Christchurch City	13	Canterbury Region	2.48169e+06	5.739e+06	1	2624900	4	937	63	2
528700	90	517800	Mt Albert Central	703	Eden-Albert Ward	7	Auckland City	02	Auckland Region	2.66415e+06	6.47752e+06	1	528700	2	912	30	1
2363000	123	584201	Richmond East	5105	Richmond Ward	51	Tasman District	16	Tasman Region	2.52603e+06	5.98556e+06	1	2363000	10	1141	55	3
398200	99	515100	Westmere	701	Western Bays Ward	7	Auckland City	02	Auckland Region	2.6642e+06	6.48096e+06	1	398200	4	940	35	2
2363102	270	584201	Richmond East	5105	Richmond Ward	51	Tasman District	16	Tasman Region	2.52645e+06	5.98574e+06	1	2363102	5	958	94	2
659200	225	522100	Papatoetoe West	802	Papatoetoe Ward	8	Manukau City	02	Auckland Region	2.67487e+06	6.46641e+06	1	659200	8	1036	101	3
396500	51	515002	Point Chevalier East	701	Western Bays Ward	7	Auckland City	02	Auckland Region	2.66306e+06	6.48006e+06	1	396500	8	1037	23	3
2626000	156	594400	St Martins	6006	Spreydon-Heathcote Ward	60	Christchurch City	13	Canterbury Region	2.48206e+06	5.73899e+06	1	2626000	3	932	51	1
265500	81	511303	Lynnmall	604	New Lynn Ward	6	Waitakere City	02	Auckland Region	2.66093e+06	6.47485e+06	1	265500	9	1097	36	3
529200	156	517500	Kingsland	703	Eden-Albert Ward	7	Auckland City	02	Auckland Region	2.66644e+06	6.48011e+06	1	529200	5	969	55	2
528800	102	517800	Mt Albert Central	703	Eden-Albert Ward	7	Auckland City	02	Auckland Region	2.66395e+06	6.47804e+06	1	528800	1	878	34	1
2625300	102	594400	St Martins	6006	Spreydon-Heathcote Ward	60	Christchurch City	13	Canterbury Region	2.48204e+06	5.73865e+06	1	2625300	3	920	34	1
2100400	165	574600	Wadestown	4703	Lambton Ward	47	Wellington City	09	Wellington Region	2.65792e+06	5.99218e+06	1	2100400	1	894	54	1
2625800	168	594400	St Martins	6006	Spreydon-Heathcote Ward	60	Christchurch City	13	Canterbury Region	2.48212e+06	5.73928e+06	1	2625800	5	966	59	2
528201	129	517800	Mt Albert Central	703	Eden-Albert Ward	7	Auckland City	02	Auckland Region	2.66441e+06	6.47857e+06	1	528201	7	1002	45	2
398000	147	515100	Westmere	701	Western Bays Ward	7	Auckland City	02	Auckland Region	2.66406e+06	6.48095e+06	1	398000	7	1012	51	2
528400	162	517800	Mt Albert Central	703	Eden-Albert Ward	7	Auckland City	02	Auckland Region	2.66393e+06	6.47819e+06	1	528400	1	879	53	1
2625200	99	594400	St Martins	6006	Spreydon-Heathcote Ward	60	Christchurch City	13	Canterbury Region	2.4819e+06	5.73859e+06	1	2625200	6	988	35	2
2626200	117	594400	St Martins	6006	Spreydon-Heathcote Ward	60	Christchurch City	13	Canterbury Region	2.48233e+06	5.73887e+06	1	2626200	2	909	39	1
2625700	120	594400	St Martins	6006	Spreydon-Heathcote Ward	60	Christchurch City	13	Canterbury Region	2.48191e+06	5.7392e+06	1	2625700	7	1009	42	2
2625900	210	594400	St Martins	6006	Spreydon-Heathcote Ward	60	Christchurch City	13	Canterbury Region	2.48228e+06	5.73915e+06	1	2625900	3	921	69	1
528601	75	517800	Mt Albert Central	703	Eden-Albert Ward	7	Auckland City	02	Auckland Region	2.66414e+06	6.47827e+06	1	528601	3	934	25	1
528500	123	517800	Mt Albert Central	703	Eden-Albert Ward	7	Auckland City	02	Auckland Region	2.6638e+06	6.47804e+06	1	528500	3	934	41	1
397200	99	515002	Point Chevalier East	701	Western Bays Ward	7	Auckland City	02	Auckland Region	2.66335e+06	6.48023e+06	1	397200	4	950	35	2
659100	306	522100	Papatoetoe West	802	Papatoetoe Ward	8	Manukau City	02	Auckland Region	2.67467e+06	6.46625e+06	1	659100	9	1111	138	3
658800	150	524303	Kohuora	802	Papatoetoe Ward	8	Manukau City	02	Auckland Region	2.67399e+06	6.4667e+06	1	658800	8	1046	68	3
397300	147	515002	Point Chevalier East	701	Western Bays Ward	7	Auckland City	02	Auckland Region	2.66329e+06	6.48013e+06	1	397300	6	984	51	2
2100800	75	574600	Wadestown	4703	Lambton Ward	47	Wellington City	09	Wellington Region	2.65807e+06	5.99243e+06	1	2100800	1	896	25	1
2624700	93	594500	Waltham	6006	Spreydon-Heathcote Ward	60	Christchurch City	13	Canterbury Region	2.48158e+06	5.73957e+06	1	2624700	10	1143	42	3
398100	60	515100	Westmere	701	Western Bays Ward	7	Auckland City	02	Auckland Region	2.6641e+06	6.48079e+06	1	398100	5	956	21	2
527800	102	517800	Mt Albert Central	703	Eden-Albert Ward	7	Auckland City	02	Auckland Region	2.66344e+06	6.47833e+06	1	527800	4	948	36	2
2364300	51	584202	Richmond West	5105	Richmond Ward	51	Tasman District	16	Tasman Region	2.52508e+06	5.98535e+06	1	2364300	8	1050	23	3
659300	60	524601	Manukau Central	802	Papatoetoe Ward	8	Manukau City	02	Auckland Region	2.67478e+06	6.46607e+06	1	659300	9	1111	27	3
658600	222	522100	Papatoetoe West	802	Papatoetoe Ward	8	Manukau City	02	Auckland Region	2.67423e+06	6.4666e+06	1	658600	9	1104	100	3
658700	69	524303	Kohuora	802	Papatoetoe Ward	8	Manukau City	02	Auckland Region	2.6741e+06	6.46669e+06	1	658700	9	1104	31	3
2495300	198	587812	Broomfield	6004	Riccarton-Wigram Ward	60	Christchurch City	13	Canterbury Region	2.47245e+06	5.74277e+06	1	2495300	5	967	69	2
528202	171	517800	Mt Albert Central	703	Eden-Albert Ward	7	Auckland City	02	Auckland Region	2.66452e+06	6.47847e+06	1	528202	7	1019	60	2
527700	123	517800	Mt Albert Central	703	Eden-Albert Ward	7	Auckland City	02	Auckland Region	2.6638e+06	6.47831e+06	1	527700	2	912	41	1
528300	159	517800	Mt Albert Central	703	Eden-Albert Ward	7	Auckland City	02	Auckland Region	2.66407e+06	6.47835e+06	1	528300	3	931	52	1
528100	102	517800	Mt Albert Central	703	Eden-Albert Ward	7	Auckland City	02	Auckland Region	2.66421e+06	6.47858e+06	1	528100	4	941	36	2
265400	195	511303	Lynnmall	604	New Lynn Ward	6	Waitakere City	02	Auckland Region	2.66107e+06	6.47485e+06	1	265400	9	1136	88	3
266500	15	511303	Lynnmall	604	New Lynn Ward	6	Waitakere City	02	Auckland Region	2.66039e+06	6.47633e+06	1	266500	8	1060	7	3
2625400	135	594400	St Martins	6006	Spreydon-Heathcote Ward	60	Christchurch City	13	Canterbury Region	2.48195e+06	5.73844e+06	1	2625400	3	932	45	1
266200	18	511303	Lynnmall	604	New Lynn Ward	6	Waitakere City	02	Auckland Region	2.66087e+06	6.47592e+06	1	266200	8	1058	8	3
2624800	279	594500	Waltham	6006	Spreydon-Heathcote Ward	60	Christchurch City	13	Canterbury Region	2.48176e+06	5.73963e+06	1	2624800	9	1094	126	3
396600	51	515002	Point Chevalier East	701	Western Bays Ward	7	Auckland City	02	Auckland Region	2.66296e+06	6.47999e+06	1	396600	8	1070	23	3
529000	57	517500	Kingsland	703	Eden-Albert Ward	7	Auckland City	02	Auckland Region	2.66656e+06	6.48017e+06	1	529000	4	950	20	2
529300	135	517500	Kingsland	703	Eden-Albert Ward	7	Auckland City	02	Auckland Region	2.6663e+06	6.48003e+06	1	529300	7	1004	47	2
396900	90	515002	Point Chevalier East	701	Western Bays Ward	7	Auckland City	02	Auckland Region	2.66329e+06	6.48051e+06	1	396900	4	950	31	2
529100	51	517500	Kingsland	703	Eden-Albert Ward	7	Auckland City	02	Auckland Region	2.6665e+06	6.48017e+06	1	529100	4	950	18	2
2626300	99	594400	St Martins	6006	Spreydon-Heathcote Ward	60	Christchurch City	13	Canterbury Region	2.48223e+06	5.73872e+06	1	2626300	8	1031	45	3
2626100	117	594400	St Martins	6006	Spreydon-Heathcote Ward	60	Christchurch City	13	Canterbury Region	2.48231e+06	5.73897e+06	1	2626100	4	947	41	2
2100700	60	574600	Wadestown	4703	Lambton Ward	47	Wellington City	09	Wellington Region	2.65814e+06	5.99234e+06	1	2100700	2	900	20	1
2364200	129	584202	Richmond West	5105	Richmond Ward	51	Tasman District	16	Tasman Region	2.52534e+06	5.98507e+06	1	2364200	9	1103	58	3
372104	177	514600	Avondale South	702	Avondale-Roskill Ward	7	Auckland City	02	Auckland Region	2.66191e+06	6.4752e+06	1	372104	6	990	62	2
397600	3	515002	Point Chevalier East	701	Western Bays Ward	7	Auckland City	02	Auckland Region	2.66403e+06	6.48012e+06	1	397600	9	1073	1	3
527900	162	517800	Mt Albert Central	703	Eden-Albert Ward	7	Auckland City	02	Auckland Region	2.66364e+06	6.47817e+06	1	527900	2	910	53	1
397900	63	515100	Westmere	701	Western Bays Ward	7	Auckland City	02	Auckland Region	2.66388e+06	6.48102e+06	1	397900	7	1012	22	2
2625000	93	594400	St Martins	6006	Spreydon-Heathcote Ward	60	Christchurch City	13	Canterbury Region	2.48183e+06	5.73896e+06	1	2625000	6	988	33	2
2498901	36	587500	Hornby South	6004	Riccarton-Wigram Ward	60	Christchurch City	13	Canterbury Region	2.47067e+06	5.7401e+06	1	2498901	3	927	12	1
2498200	141	587830	Islington	6004	Riccarton-Wigram Ward	60	Christchurch City	13	Canterbury Region	2.47045e+06	5.74031e+06	1	2498200	4	944	49	2
2497600	246	587830	Islington	6004	Riccarton-Wigram Ward	60	Christchurch City	13	Canterbury Region	2.47012e+06	5.74075e+06	1	2497600	6	987	86	2
2891300	174	603500	Woodhaugh	7103	Cargill Ward	71	Dunedin City	14	Otago Region	2.31668e+06	5.48059e+06	1	2891300	9	1105	78	3
529900	204	517500	Kingsland	703	Eden-Albert Ward	7	Auckland City	02	Auckland Region	2.66557e+06	6.4799e+06	1	529900	6	981	71	2
398300	51	515100	Westmere	701	Western Bays Ward	7	Auckland City	02	Auckland Region	2.66426e+06	6.48087e+06	1	398300	4	940	18	2
530500	153	517500	Kingsland	703	Eden-Albert Ward	7	Auckland City	02	Auckland Region	2.66579e+06	6.47967e+06	1	530500	4	943	54	2
531100	144	517500	Kingsland	703	Eden-Albert Ward	7	Auckland City	02	Auckland Region	2.66642e+06	6.47957e+06	1	531100	7	1001	50	2
2626500	42	594400	St Martins	6006	Spreydon-Heathcote Ward	60	Christchurch City	13	Canterbury Region	2.48247e+06	5.73824e+06	1	2626500	8	1031	19	3
2365713	195	584202	Richmond West	5105	Richmond Ward	51	Tasman District	16	Tasman Region	2.52449e+06	5.98428e+06	1	2365713	1	882	64	1
2365710	66	584202	Richmond West	5105	Richmond Ward	51	Tasman District	16	Tasman Region	2.52445e+06	5.98451e+06	1	2365710	9	1108	30	3
2365501	60	584202	Richmond West	5105	Richmond Ward	51	Tasman District	16	Tasman Region	2.52385e+06	5.98482e+06	1	2365501	3	932	20	1
137706	9	506616	Matheson Bay	401	Northern Ward	4	Rodney District	02	Auckland Region	2.67182e+06	6.54311e+06	1	137706	6	985	3	2
530600	156	517500	Kingsland	703	Eden-Albert Ward	7	Auckland City	02	Auckland Region	2.66548e+06	6.47952e+06	1	530600	7	1020	55	2
2103400	183	574700	Wilton-Otari	4702	Onslow-Western Ward	47	Wellington City	09	Wellington Region	2.65775e+06	5.99166e+06	1	2103400	5	954	64	2
1448200	93	547400	Pirimai	3199	Area Outside Ward	31	Napier City	06	Hawke's Bay Region	2.84343e+06	6.18086e+06	1	1448200	5	957	33	2
2366103	48	584202	Richmond West	5105	Richmond Ward	51	Tasman District	16	Tasman Region	2.52573e+06	5.9848e+06	1	2366103	4	948	17	2
529700	45	517500	Kingsland	703	Eden-Albert Ward	7	Auckland City	02	Auckland Region	2.66618e+06	6.47981e+06	1	529700	10	1163	20	3
530300	174	517500	Kingsland	703	Eden-Albert Ward	7	Auckland City	02	Auckland Region	2.66577e+06	6.47975e+06	1	530300	6	995	61	2
530900	12	517500	Kingsland	703	Eden-Albert Ward	7	Auckland City	02	Auckland Region	2.66641e+06	6.47986e+06	1	530900	5	953	4	2
1578601	114	551502	Spotswood	3301	New Plymouth City Ward	33	New Plymouth District	07	Taranaki Region	2.59979e+06	6.23588e+06	1	1578601	8	1072	51	3
1578502	141	551502	Spotswood	3301	New Plymouth City Ward	33	New Plymouth District	07	Taranaki Region	2.60007e+06	6.23628e+06	1	1578502	6	986	49	2
2364400	132	584202	Richmond West	5105	Richmond Ward	51	Tasman District	16	Tasman Region	2.52517e+06	5.98506e+06	1	2364400	7	1000	46	2
2364500	102	584202	Richmond West	5105	Richmond Ward	51	Tasman District	16	Tasman Region	2.52494e+06	5.98517e+06	1	2364500	5	969	36	2
137707	12	506616	Matheson Bay	401	Northern Ward	4	Rodney District	02	Auckland Region	2.6717e+06	6.54296e+06	1	137707	6	985	4	2
2365400	141	584201	Richmond East	5105	Richmond Ward	51	Tasman District	16	Tasman Region	2.52545e+06	5.98589e+06	1	2365400	7	1008	49	2
529500	114	517500	Kingsland	703	Eden-Albert Ward	7	Auckland City	02	Auckland Region	2.66641e+06	6.47995e+06	1	529500	6	978	40	2
2628200	120	595500	Beckenham	6006	Spreydon-Heathcote Ward	60	Christchurch City	13	Canterbury Region	2.48113e+06	5.73866e+06	1	2628200	3	921	40	1
2628300	225	595500	Beckenham	6006	Spreydon-Heathcote Ward	60	Christchurch City	13	Canterbury Region	2.48138e+06	5.73866e+06	1	2628300	3	920	74	1
529600	93	517500	Kingsland	703	Eden-Albert Ward	7	Auckland City	02	Auckland Region	2.66622e+06	6.47993e+06	1	529600	4	950	33	2
2103800	87	574700	Wilton-Otari	4702	Onslow-Western Ward	47	Wellington City	09	Wellington Region	2.65758e+06	5.99188e+06	1	2103800	5	963	30	2
2364900	105	584202	Richmond West	5105	Richmond Ward	51	Tasman District	16	Tasman Region	2.52481e+06	5.98512e+06	1	2364900	3	921	35	1
1578400	108	551502	Spotswood	3301	New Plymouth City Ward	33	New Plymouth District	07	Taranaki Region	2.59961e+06	6.23601e+06	1	1578400	8	1058	49	3
1578602	84	551502	Spotswood	3301	New Plymouth City Ward	33	New Plymouth District	07	Taranaki Region	2.60013e+06	6.23606e+06	1	1578602	8	1072	38	3
2103300	69	574700	Wilton-Otari	4702	Onslow-Western Ward	47	Wellington City	09	Wellington Region	2.65751e+06	5.99153e+06	1	2103300	5	963	24	2
792900	138	525420	Papakura North	902	Ardmore Ward	9	Papakura District	02	Auckland Region	2.68338e+06	6.45822e+06	1	792900	9	1136	62	3
2364800	51	584202	Richmond West	5105	Richmond Ward	51	Tasman District	16	Tasman Region	2.52492e+06	5.98499e+06	1	2364800	3	934	17	1
530100	114	517500	Kingsland	703	Eden-Albert Ward	7	Auckland City	02	Auckland Region	2.66576e+06	6.47983e+06	1	530100	3	927	38	1
137703	36	506616	Matheson Bay	401	Northern Ward	4	Rodney District	02	Auckland Region	2.67204e+06	6.54336e+06	1	137703	6	985	13	2
531000	51	517500	Kingsland	703	Eden-Albert Ward	7	Auckland City	02	Auckland Region	2.66646e+06	6.47976e+06	1	531000	8	1039	23	3
1578501	36	551502	Spotswood	3301	New Plymouth City Ward	33	New Plymouth District	07	Taranaki Region	2.59991e+06	6.23665e+06	1	1578501	6	986	13	2
793000	15	525410	Papakura Central	903	Drury Ward	9	Papakura District	02	Auckland Region	2.68322e+06	6.45794e+06	1	793000	9	1086	7	3
530200	183	517500	Kingsland	703	Eden-Albert Ward	7	Auckland City	02	Auckland Region	2.66546e+06	6.47972e+06	1	530200	7	1009	64	2
2365900	126	584202	Richmond West	5105	Richmond Ward	51	Tasman District	16	Tasman Region	2.52544e+06	5.98482e+06	1	2365900	4	936	44	2
2365100	135	584202	Richmond West	5105	Richmond Ward	51	Tasman District	16	Tasman Region	2.52481e+06	5.98483e+06	1	2365100	4	950	47	2
2365707	144	584202	Richmond West	5105	Richmond Ward	51	Tasman District	16	Tasman Region	2.52462e+06	5.98481e+06	1	2365707	5	965	50	2
529400	6	517500	Kingsland	703	Eden-Albert Ward	7	Auckland City	02	Auckland Region	2.66665e+06	6.48005e+06	1	529400	6	978	2	2
661100	291	522201	Papatoetoe North	802	Papatoetoe Ward	8	Manukau City	02	Auckland Region	2.6756e+06	6.46873e+06	1	661100	7	1015	102	2
398500	114	515100	Westmere	701	Western Bays Ward	7	Auckland City	02	Auckland Region	2.66449e+06	6.4811e+06	1	398500	5	956	40	2
2627000	72	594400	St Martins	6006	Spreydon-Heathcote Ward	60	Christchurch City	13	Canterbury Region	2.48211e+06	5.73812e+06	1	2627000	1	888	24	1
2626700	165	594400	St Martins	6006	Spreydon-Heathcote Ward	60	Christchurch City	13	Canterbury Region	2.48244e+06	5.73804e+06	1	2626700	6	976	58	2
530400	132	517500	Kingsland	703	Eden-Albert Ward	7	Auckland City	02	Auckland Region	2.66549e+06	6.47962e+06	1	530400	7	1002	46	2
137100	165	505400	Leigh	401	Northern Ward	4	Rodney District	02	Auckland Region	2.67258e+06	6.54359e+06	1	137100	6	988	58	2
530000	168	517500	Kingsland	703	Eden-Albert Ward	7	Auckland City	02	Auckland Region	2.66547e+06	6.47981e+06	1	530000	3	926	55	1
1579200	123	551503	Marfell	3301	New Plymouth City Ward	33	New Plymouth District	07	Taranaki Region	2.60043e+06	6.23621e+06	1	1579200	9	1083	55	3
1579100	60	551502	Spotswood	3301	New Plymouth City Ward	33	New Plymouth District	07	Taranaki Region	2.60028e+06	6.23632e+06	1	1579100	7	1030	21	2
137705	21	506616	Matheson Bay	401	Northern Ward	4	Rodney District	02	Auckland Region	2.67198e+06	6.54319e+06	1	137705	6	985	7	2
2103700	33	574700	Wilton-Otari	4703	Lambton Ward	47	Wellington City	09	Wellington Region	2.65787e+06	5.99232e+06	1	2103700	1	885	11	1
2365709	66	584202	Richmond West	5105	Richmond Ward	51	Tasman District	16	Tasman Region	2.52435e+06	5.98468e+06	1	2365709	6	983	23	2
2365600	69	584202	Richmond West	5105	Richmond Ward	51	Tasman District	16	Tasman Region	2.52458e+06	5.9851e+06	1	2365600	8	1046	31	3
137000	108	505400	Leigh	401	Northern Ward	4	Rodney District	02	Auckland Region	2.67236e+06	6.54385e+06	1	137000	7	1013	38	2
530700	87	517500	Kingsland	703	Eden-Albert Ward	7	Auckland City	02	Auckland Region	2.66571e+06	6.47956e+06	1	530700	6	981	30	2
530800	48	517500	Kingsland	703	Eden-Albert Ward	7	Auckland City	02	Auckland Region	2.66587e+06	6.47962e+06	1	530800	3	927	16	1
402700	108	515410	Grey Lynn West	701	Western Bays Ward	7	Auckland City	02	Auckland Region	2.6654e+06	6.48145e+06	1	402700	4	940	38	2
533800	60	517600	St Lukes	703	Eden-Albert Ward	7	Auckland City	02	Auckland Region	2.66438e+06	6.47934e+06	1	533800	3	923	20	1
402500	141	515410	Grey Lynn West	701	Western Bays Ward	7	Auckland City	02	Auckland Region	2.66492e+06	6.48122e+06	1	402500	4	940	49	2
533900	141	517600	St Lukes	703	Eden-Albert Ward	7	Auckland City	02	Auckland Region	2.66441e+06	6.47925e+06	1	533900	2	908	47	1
403500	114	515410	Grey Lynn West	701	Western Bays Ward	7	Auckland City	02	Auckland Region	2.66502e+06	6.48116e+06	1	403500	5	956	40	2
534700	138	517600	St Lukes	703	Eden-Albert Ward	7	Auckland City	02	Auckland Region	2.66507e+06	6.47916e+06	1	534700	7	1013	48	2
2760800	36	598312	Orari	6401	Geraldine Ward	64	Timaru District	13	Canterbury Region	2.37246e+06	5.68403e+06	1	2760800	2	910	12	1
1581000	84	551501	Lynmouth	3301	New Plymouth City Ward	33	New Plymouth District	07	Taranaki Region	2.6008e+06	6.23725e+06	1	1581000	5	969	29	2
1580900	72	551501	Lynmouth	3301	New Plymouth City Ward	33	New Plymouth District	07	Taranaki Region	2.6005e+06	6.23716e+06	1	1580900	5	969	25	2
438304	129	514103	Auckland Central East	704	Hobson Ward	7	Auckland City	02	Auckland Region	2.66857e+06	6.48215e+06	1	438304	9	1080	58	3
2104302	51	574700	Wilton-Otari	4702	Onslow-Western Ward	47	Wellington City	09	Wellington Region	2.65777e+06	5.99184e+06	1	2104302	1	880	17	1
2105300	147	574700	Wilton-Otari	4702	Onslow-Western Ward	47	Wellington City	09	Wellington Region	2.65741e+06	5.99233e+06	1	2105300	1	885	49	1
531800	18	517500	Kingsland	703	Eden-Albert Ward	7	Auckland City	02	Auckland Region	2.66582e+06	6.47955e+06	1	531800	8	1045	8	3
2760000	15	598312	Orari	6401	Geraldine Ward	64	Timaru District	13	Canterbury Region	2.37042e+06	5.67275e+06	1	2760000	4	942	5	2
2104402	60	574700	Wilton-Otari	4702	Onslow-Western Ward	47	Wellington City	09	Wellington Region	2.65794e+06	5.99185e+06	1	2104402	4	939	21	2
2630000	90	595300	Hillmorton	6006	Spreydon-Heathcote Ward	60	Christchurch City	13	Canterbury Region	2.4766e+06	5.73874e+06	1	2630000	6	982	31	2
1449100	108	547400	Pirimai	3199	Area Outside Ward	31	Napier City	06	Hawke's Bay Region	2.84372e+06	6.18091e+06	1	1449100	8	1033	49	3
270500	147	511700	Kelston Central	604	New Lynn Ward	6	Waitakere City	02	Auckland Region	2.65891e+06	6.47739e+06	1	270500	7	1021	51	2
2104902	90	574700	Wilton-Otari	4702	Onslow-Western Ward	47	Wellington City	09	Wellington Region	2.65764e+06	5.99262e+06	1	2104902	4	938	31	2
2105002	117	574700	Wilton-Otari	4702	Onslow-Western Ward	47	Wellington City	09	Wellington Region	2.65777e+06	5.9927e+06	1	2105002	5	967	41	2
532200	93	517500	Kingsland	703	Eden-Albert Ward	7	Auckland City	02	Auckland Region	2.6655e+06	6.47929e+06	1	532200	4	946	33	2
2629200	3	590300	Middleton	6006	Spreydon-Heathcote Ward	60	Christchurch City	13	Canterbury Region	2.47672e+06	5.73955e+06	1	2629200	4	942	1	2
532100	288	517500	Kingsland	703	Eden-Albert Ward	7	Auckland City	02	Auckland Region	2.66544e+06	6.47934e+06	1	532100	4	946	101	2
400300	117	515100	Westmere	701	Western Bays Ward	7	Auckland City	02	Auckland Region	2.66339e+06	6.4814e+06	1	400300	1	897	39	1
532700	114	517500	Kingsland	703	Eden-Albert Ward	7	Auckland City	02	Auckland Region	2.66522e+06	6.47909e+06	1	532700	3	929	38	1
138601	87	506615	Cape Rodney	401	Northern Ward	4	Rodney District	02	Auckland Region	2.66818e+06	6.54058e+06	1	138601	5	957	30	2
438216	318	514101	Auckland Harbourside	704	Hobson Ward	7	Auckland City	02	Auckland Region	2.66871e+06	6.4821e+06	1	438216	7	1029	111	2
532000	93	517500	Kingsland	703	Eden-Albert Ward	7	Auckland City	02	Auckland Region	2.66542e+06	6.47943e+06	1	532000	8	1045	42	3
532600	141	517500	Kingsland	703	Eden-Albert Ward	7	Auckland City	02	Auckland Region	2.66546e+06	6.47918e+06	1	532600	3	929	47	1
138602	102	506615	Cape Rodney	401	Northern Ward	4	Rodney District	02	Auckland Region	2.66766e+06	6.53968e+06	1	138602	4	953	36	2
2104401	78	574700	Wilton-Otari	4703	Lambton Ward	47	Wellington City	09	Wellington Region	2.65795e+06	5.992e+06	1	2104401	4	939	27	2
270300	162	511700	Kelston Central	604	New Lynn Ward	6	Waitakere City	02	Auckland Region	2.65898e+06	6.47765e+06	1	270300	9	1089	73	3
2497700	111	587830	Islington	6004	Riccarton-Wigram Ward	60	Christchurch City	13	Canterbury Region	2.4703e+06	5.74073e+06	1	2497700	6	985	39	2
2891202	36	603500	Woodhaugh	7103	Cargill Ward	71	Dunedin City	14	Otago Region	2.31674e+06	5.48066e+06	1	2891202	6	993	13	2
2890900	51	603500	Woodhaugh	7104	Hills Ward	71	Dunedin City	14	Otago Region	2.3163e+06	5.48131e+06	1	2890900	3	927	17	1
1711400	6	557400	Upper Aramoho	3702	Urban Ward	37	Wanganui District	08	Manawatu-Wanganui Region	2.68866e+06	6.14356e+06	1	1711400	4	948	2	2
532800	99	517500	Kingsland	703	Eden-Albert Ward	7	Auckland City	02	Auckland Region	2.66548e+06	6.47908e+06	1	532800	4	950	35	2
794600	135	525630	Papakura North East	902	Ardmore Ward	9	Papakura District	02	Auckland Region	2.68357e+06	6.45828e+06	1	794600	6	990	47	2
2498601	102	587830	Islington	6004	Riccarton-Wigram Ward	60	Christchurch City	13	Canterbury Region	2.47091e+06	5.73989e+06	1	2498601	6	983	36	2
138201	87	506615	Cape Rodney	401	Northern Ward	4	Rodney District	02	Auckland Region	2.66328e+06	6.54005e+06	1	138201	5	960	30	2
438104	33	514103	Auckland Central East	704	Hobson Ward	7	Auckland City	02	Auckland Region	2.66812e+06	6.48248e+06	1	438104	8	1060	15	3
532900	114	517500	Kingsland	703	Eden-Albert Ward	7	Auckland City	02	Auckland Region	2.66545e+06	6.47898e+06	1	532900	4	950	40	2
662400	6	522201	Papatoetoe North	802	Papatoetoe Ward	8	Manukau City	02	Auckland Region	2.67595e+06	6.46858e+06	1	662400	9	1079	3	3
1581100	42	551501	Lynmouth	3301	New Plymouth City Ward	33	New Plymouth District	07	Taranaki Region	2.60087e+06	6.23736e+06	1	1581100	5	973	15	2
2629300	165	595300	Hillmorton	6006	Spreydon-Heathcote Ward	60	Christchurch City	13	Canterbury Region	2.47685e+06	5.73901e+06	1	2629300	5	957	58	2
1448900	105	547400	Pirimai	3199	Area Outside Ward	31	Napier City	06	Hawke's Bay Region	2.8438e+06	6.18101e+06	1	1448900	5	959	37	2
531900	87	517500	Kingsland	703	Eden-Albert Ward	7	Auckland City	02	Auckland Region	2.66565e+06	6.47949e+06	1	531900	8	1045	39	3
2105200	228	574700	Wilton-Otari	4702	Onslow-Western Ward	47	Wellington City	09	Wellington Region	2.65754e+06	5.99269e+06	1	2105200	3	931	75	1
2498501	93	587830	Islington	6004	Riccarton-Wigram Ward	60	Christchurch City	13	Canterbury Region	2.47074e+06	5.74004e+06	1	2498501	6	996	33	2
2498602	69	587500	Hornby South	6004	Riccarton-Wigram Ward	60	Christchurch City	13	Canterbury Region	2.47104e+06	5.73993e+06	1	2498602	6	983	24	2
531300	6	517500	Kingsland	703	Eden-Albert Ward	7	Auckland City	02	Auckland Region	2.66604e+06	6.47961e+06	1	531300	5	953	2	2
2759600	12	598312	Orari	6401	Geraldine Ward	64	Timaru District	13	Canterbury Region	2.36743e+06	5.67582e+06	1	2759600	3	932	4	1
438212	222	514101	Auckland Harbourside	704	Hobson Ward	7	Auckland City	02	Auckland Region	2.66835e+06	6.48252e+06	1	438212	7	1030	78	2
176204	57	506200	Silverdale North	403	Eastern Ward	4	Rodney District	02	Auckland Region	2.66255e+06	6.51553e+06	1	176204	1	895	19	1
1448700	102	547400	Pirimai	3199	Area Outside Ward	31	Napier City	06	Hawke's Bay Region	2.84338e+06	6.18074e+06	1	1448700	6	991	36	2
2498905	78	587830	Islington	6004	Riccarton-Wigram Ward	60	Christchurch City	13	Canterbury Region	2.47104e+06	5.7398e+06	1	2498905	6	978	27	2
270600	111	511700	Kelston Central	604	New Lynn Ward	6	Waitakere City	02	Auckland Region	2.65908e+06	6.47754e+06	1	270600	8	1048	50	3
2498300	72	587830	Islington	6004	Riccarton-Wigram Ward	60	Christchurch City	13	Canterbury Region	2.4704e+06	5.74017e+06	1	2498300	3	927	24	1
2498100	189	587830	Islington	6004	Riccarton-Wigram Ward	60	Christchurch City	13	Canterbury Region	2.47033e+06	5.74042e+06	1	2498100	6	975	66	2
2891100	69	603500	Woodhaugh	7104	Hills Ward	71	Dunedin City	14	Otago Region	2.31613e+06	5.48088e+06	1	2891100	3	924	23	1
2891000	180	603500	Woodhaugh	7104	Hills Ward	71	Dunedin City	14	Otago Region	2.31617e+06	5.48101e+06	1	2891000	7	1019	63	2
2760300	12	598312	Orari	6401	Geraldine Ward	64	Timaru District	13	Canterbury Region	2.37101e+06	5.67063e+06	1	2760300	4	942	4	2
400400	57	515100	Westmere	701	Western Bays Ward	7	Auckland City	02	Auckland Region	2.66327e+06	6.48137e+06	1	400400	6	982	20	2
532300	108	517500	Kingsland	703	Eden-Albert Ward	7	Auckland City	02	Auckland Region	2.66603e+06	6.47934e+06	1	532300	6	997	38	2
1581200	48	551501	Lynmouth	3301	New Plymouth City Ward	33	New Plymouth District	07	Taranaki Region	2.60109e+06	6.23735e+06	1	1581200	5	973	17	2
2104200	132	574700	Wilton-Otari	4702	Onslow-Western Ward	47	Wellington City	09	Wellington Region	2.65758e+06	5.99168e+06	1	2104200	1	890	44	1
795000	114	525630	Papakura North East	902	Ardmore Ward	9	Papakura District	02	Auckland Region	2.68387e+06	6.45854e+06	1	795000	6	992	40	2
794800	90	525630	Papakura North East	902	Ardmore Ward	9	Papakura District	02	Auckland Region	2.68364e+06	6.45856e+06	1	794800	6	987	31	2
2105100	102	574700	Wilton-Otari	4702	Onslow-Western Ward	47	Wellington City	09	Wellington Region	2.6578e+06	5.99257e+06	1	2105100	4	941	36	2
138102	135	506615	Cape Rodney	401	Northern Ward	4	Rodney District	02	Auckland Region	2.66438e+06	6.53735e+06	1	138102	3	927	45	1
531200	156	517500	Kingsland	703	Eden-Albert Ward	7	Auckland City	02	Auckland Region	2.66622e+06	6.4796e+06	1	531200	8	1039	70	3
531400	165	517500	Kingsland	703	Eden-Albert Ward	7	Auckland City	02	Auckland Region	2.666e+06	6.47945e+06	1	531400	5	953	58	2
138701	216	506615	Cape Rodney	401	Northern Ward	4	Rodney District	02	Auckland Region	2.66835e+06	6.54045e+06	1	138701	5	954	76	2
662300	240	522201	Papatoetoe North	802	Papatoetoe Ward	8	Manukau City	02	Auckland Region	2.67578e+06	6.46866e+06	1	662300	8	1056	108	3
138202	48	506615	Cape Rodney	401	Northern Ward	4	Rodney District	02	Auckland Region	2.66572e+06	6.53852e+06	1	138202	5	960	17	2
1581300	93	551501	Lynmouth	3301	New Plymouth City Ward	33	New Plymouth District	07	Taranaki Region	2.60149e+06	6.2375e+06	1	1581300	6	988	33	2
270400	129	511700	Kelston Central	604	New Lynn Ward	6	Waitakere City	02	Auckland Region	2.65882e+06	6.47748e+06	1	270400	7	1015	45	2
794500	96	525630	Papakura North East	902	Ardmore Ward	9	Papakura District	02	Auckland Region	2.68346e+06	6.45847e+06	1	794500	8	1065	43	3
794900	150	525630	Papakura North East	902	Ardmore Ward	9	Papakura District	02	Auckland Region	2.68371e+06	6.45841e+06	1	794900	5	955	52	2
1449200	108	547400	Pirimai	3199	Area Outside Ward	31	Napier City	06	Hawke's Bay Region	2.84353e+06	6.18078e+06	1	1449200	9	1094	49	3
2498502	75	587830	Islington	6004	Riccarton-Wigram Ward	60	Christchurch City	13	Canterbury Region	2.47082e+06	5.73997e+06	1	2498502	6	996	26	2
2104800	78	574700	Wilton-Otari	4702	Onslow-Western Ward	47	Wellington City	09	Wellington Region	2.65775e+06	5.99317e+06	1	2104800	1	885	26	1
2497800	75	587830	Islington	6004	Riccarton-Wigram Ward	60	Christchurch City	13	Canterbury Region	2.47044e+06	5.74071e+06	1	2497800	7	1022	26	2
2891201	15	603500	Woodhaugh	7104	Hills Ward	71	Dunedin City	14	Otago Region	2.31636e+06	5.48086e+06	1	2891201	6	993	5	2
1581400	81	551501	Lynmouth	3301	New Plymouth City Ward	33	New Plymouth District	07	Taranaki Region	2.60148e+06	6.23737e+06	1	1581400	6	988	28	2
270700	132	511700	Kelston Central	604	New Lynn Ward	6	Waitakere City	02	Auckland Region	2.65899e+06	6.47732e+06	1	270700	8	1055	59	3
138203	69	506615	Cape Rodney	401	Northern Ward	4	Rodney District	02	Auckland Region	2.66441e+06	6.53766e+06	1	138203	3	927	23	1
1448800	123	547400	Pirimai	3199	Area Outside Ward	31	Napier City	06	Hawke's Bay Region	2.84361e+06	6.18112e+06	1	1448800	6	991	43	2
198401	102	508320	Glenfield North	503	Harbour Ward	5	North Shore City	02	Auckland Region	2.66504e+06	6.49017e+06	1	198401	10	1189	46	3
665500	336	522202	Papatoetoe Central	802	Papatoetoe Ward	8	Manukau City	02	Auckland Region	2.67661e+06	6.46739e+06	1	665500	8	1066	151	3
1581700	93	551501	Lynmouth	3301	New Plymouth City Ward	33	New Plymouth District	07	Taranaki Region	2.60117e+06	6.23724e+06	1	1581700	5	958	33	2
534100	33	517600	St Lukes	703	Eden-Albert Ward	7	Auckland City	02	Auckland Region	2.66408e+06	6.47914e+06	1	534100	5	971	12	2
2631200	201	595300	Hillmorton	6006	Spreydon-Heathcote Ward	60	Christchurch City	13	Canterbury Region	2.47687e+06	5.73822e+06	1	2631200	10	1163	90	3
533300	168	517600	St Lukes	703	Eden-Albert Ward	7	Auckland City	02	Auckland Region	2.66477e+06	6.4796e+06	1	533300	4	936	59	2
1451300	78	547001	Tamatea North	3199	Area Outside Ward	31	Napier City	06	Hawke's Bay Region	2.84304e+06	6.18102e+06	1	1451300	9	1075	35	3
1451200	162	547001	Tamatea North	3199	Area Outside Ward	31	Napier City	06	Hawke's Bay Region	2.84292e+06	6.18098e+06	1	1451200	6	977	57	2
534601	180	517600	St Lukes	703	Eden-Albert Ward	7	Auckland City	02	Auckland Region	2.66493e+06	6.47939e+06	1	534601	5	954	63	2
1582400	135	551501	Lynmouth	3301	New Plymouth City Ward	33	New Plymouth District	07	Taranaki Region	2.60086e+06	6.23709e+06	1	1582400	9	1133	61	3
2631300	174	595300	Hillmorton	6006	Spreydon-Heathcote Ward	60	Christchurch City	13	Canterbury Region	2.47687e+06	5.7388e+06	1	2631300	8	1039	78	3
795300	123	525630	Papakura North East	902	Ardmore Ward	9	Papakura District	02	Auckland Region	2.68399e+06	6.45861e+06	1	795300	4	951	43	2
796600	159	525610	Papakura East	904	Red Hill Ward	9	Papakura District	02	Auckland Region	2.68458e+06	6.45863e+06	1	796600	10	1141	72	3
402400	159	515410	Grey Lynn West	701	Western Bays Ward	7	Auckland City	02	Auckland Region	2.66486e+06	6.48129e+06	1	402400	1	893	52	1
534002	78	517600	St Lukes	703	Eden-Albert Ward	7	Auckland City	02	Auckland Region	2.6644e+06	6.47918e+06	1	534002	5	965	27	2
2762800	168	598500	Geraldine	6401	Geraldine Ward	64	Timaru District	13	Canterbury Region	2.36963e+06	5.67856e+06	1	2762800	4	950	59	2
2762700	111	598500	Geraldine	6401	Geraldine Ward	64	Timaru District	13	Canterbury Region	2.36976e+06	5.67889e+06	1	2762700	7	1009	39	2
2448212	42	586305	Kingsbury	5903	Rangiora Ward	59	Waimakariri District	13	Canterbury Region	2.47623e+06	5.76793e+06	1	2448212	2	901	14	1
665400	261	522202	Papatoetoe Central	802	Papatoetoe Ward	8	Manukau City	02	Auckland Region	2.67674e+06	6.46763e+06	1	665400	8	1040	117	3
533400	153	517600	St Lukes	703	Eden-Albert Ward	7	Auckland City	02	Auckland Region	2.66494e+06	6.47959e+06	1	533400	5	974	54	2
533601	180	517600	St Lukes	703	Eden-Albert Ward	7	Auckland City	02	Auckland Region	2.66519e+06	6.4797e+06	1	533601	8	1058	81	3
402800	201	515431	Surrey Crescent	701	Western Bays Ward	7	Auckland City	02	Auckland Region	2.66444e+06	6.48097e+06	1	402800	5	973	70	2
2631700	198	595300	Hillmorton	6006	Spreydon-Heathcote Ward	60	Christchurch City	13	Canterbury Region	2.47712e+06	5.73898e+06	1	2631700	6	987	69	2
402600	123	515410	Grey Lynn West	701	Western Bays Ward	7	Auckland City	02	Auckland Region	2.66525e+06	6.48141e+06	1	402600	2	917	41	1
613200	144	520202	Ellerslie South	706	Tamaki-Maungakiekie Ward	7	Auckland City	02	Auckland Region	2.67094e+06	6.47704e+06	1	613200	3	929	48	1
403300	162	515431	Surrey Crescent	701	Western Bays Ward	7	Auckland City	02	Auckland Region	2.66453e+06	6.48068e+06	1	403300	4	939	57	2
1582700	162	551502	Spotswood	3301	New Plymouth City Ward	33	New Plymouth District	07	Taranaki Region	2.60005e+06	6.23663e+06	1	1582700	5	971	57	2
1582800	126	551502	Spotswood	3301	New Plymouth City Ward	33	New Plymouth District	07	Taranaki Region	2.6002e+06	6.23678e+06	1	1582800	7	1027	44	2
1582900	117	551501	Lynmouth	3301	New Plymouth City Ward	33	New Plymouth District	07	Taranaki Region	2.60029e+06	6.23683e+06	1	1582900	9	1092	53	3
2630600	228	595300	Hillmorton	6006	Spreydon-Heathcote Ward	60	Christchurch City	13	Canterbury Region	2.47662e+06	5.73823e+06	1	2630600	7	1027	80	2
2631400	159	595300	Hillmorton	6006	Spreydon-Heathcote Ward	60	Christchurch City	13	Canterbury Region	2.47684e+06	5.73857e+06	1	2631400	10	1180	72	3
533501	294	517600	St Lukes	703	Eden-Albert Ward	7	Auckland City	02	Auckland Region	2.66513e+06	6.47962e+06	1	533501	8	1039	132	3
1451100	141	547001	Tamatea North	3199	Area Outside Ward	31	Napier City	06	Hawke's Bay Region	2.84306e+06	6.18123e+06	1	1451100	6	990	49	2
533000	243	517600	St Lukes	703	Eden-Albert Ward	7	Auckland City	02	Auckland Region	2.66486e+06	6.47986e+06	1	533000	4	951	85	2
665602	126	522202	Papatoetoe Central	802	Papatoetoe Ward	8	Manukau City	02	Auckland Region	2.67688e+06	6.46744e+06	1	665602	9	1095	57	3
1581600	90	551501	Lynmouth	3301	New Plymouth City Ward	33	New Plymouth District	07	Taranaki Region	2.60136e+06	6.23714e+06	1	1581600	5	958	31	2
2631100	60	595300	Hillmorton	6006	Spreydon-Heathcote Ward	60	Christchurch City	13	Canterbury Region	2.4769e+06	5.73832e+06	1	2631100	10	1193	27	3
533502	78	517600	St Lukes	703	Eden-Albert Ward	7	Auckland City	02	Auckland Region	2.66527e+06	6.47993e+06	1	533502	5	959	27	2
2630400	204	595300	Hillmorton	6006	Spreydon-Heathcote Ward	60	Christchurch City	13	Canterbury Region	2.47647e+06	5.7385e+06	1	2630400	6	996	71	2
534200	54	517600	St Lukes	703	Eden-Albert Ward	7	Auckland City	02	Auckland Region	2.66422e+06	6.47906e+06	1	534200	5	971	19	2
795500	186	525630	Papakura North East	902	Ardmore Ward	9	Papakura District	02	Auckland Region	2.68415e+06	6.45888e+06	1	795500	5	970	65	2
795400	252	525630	Papakura North East	902	Ardmore Ward	9	Papakura District	02	Auckland Region	2.68405e+06	6.4588e+06	1	795400	9	1111	113	3
1450700	135	547001	Tamatea North	3199	Area Outside Ward	31	Napier City	06	Hawke's Bay Region	2.84294e+06	6.18176e+06	1	1450700	7	1025	47	2
1450800	141	547001	Tamatea North	3199	Area Outside Ward	31	Napier City	06	Hawke's Bay Region	2.84307e+06	6.18168e+06	1	1450800	9	1099	63	3
403400	114	515410	Grey Lynn West	701	Western Bays Ward	7	Auckland City	02	Auckland Region	2.66499e+06	6.48122e+06	1	403400	3	927	38	1
2761800	30	598312	Orari	6401	Geraldine Ward	64	Timaru District	13	Canterbury Region	2.37037e+06	5.68133e+06	1	2761800	1	870	10	1
403600	195	515410	Grey Lynn West	701	Western Bays Ward	7	Auckland City	02	Auckland Region	2.66512e+06	6.48112e+06	1	403600	6	981	68	2
139800	42	505500	Warkworth	401	Northern Ward	4	Rodney District	02	Auckland Region	2.6598e+06	6.53302e+06	1	139800	7	1005	15	2
402900	99	515431	Surrey Crescent	701	Western Bays Ward	7	Auckland City	02	Auckland Region	2.6645e+06	6.4809e+06	1	402900	4	936	35	2
665601	45	522202	Papatoetoe Central	802	Papatoetoe Ward	8	Manukau City	02	Auckland Region	2.67674e+06	6.46744e+06	1	665601	9	1095	20	3
665300	300	522202	Papatoetoe Central	802	Papatoetoe Ward	8	Manukau City	02	Auckland Region	2.67646e+06	6.4676e+06	1	665300	8	1052	135	3
534500	186	517600	St Lukes	703	Eden-Albert Ward	7	Auckland City	02	Auckland Region	2.66479e+06	6.47928e+06	1	534500	6	975	65	2
1582100	108	551501	Lynmouth	3301	New Plymouth City Ward	33	New Plymouth District	07	Taranaki Region	2.60108e+06	6.23694e+06	1	1582100	3	921	36	1
1582500	69	551501	Lynmouth	3301	New Plymouth City Ward	33	New Plymouth District	07	Taranaki Region	2.6003e+06	6.23707e+06	1	1582500	8	1072	31	3
2630700	141	595300	Hillmorton	6006	Spreydon-Heathcote Ward	60	Christchurch City	13	Canterbury Region	2.47646e+06	5.73814e+06	1	2630700	9	1097	63	3
2631600	102	595300	Hillmorton	6006	Spreydon-Heathcote Ward	60	Christchurch City	13	Canterbury Region	2.47717e+06	5.73846e+06	1	2631600	4	942	36	2
796500	141	525610	Papakura East	904	Red Hill Ward	9	Papakura District	02	Auckland Region	2.68462e+06	6.45877e+06	1	796500	9	1104	63	3
796400	156	525610	Papakura East	904	Red Hill Ward	9	Papakura District	02	Auckland Region	2.68481e+06	6.45876e+06	1	796400	10	1217	70	3
403000	114	515431	Surrey Crescent	701	Western Bays Ward	7	Auckland City	02	Auckland Region	2.66464e+06	6.48095e+06	1	403000	2	911	38	1
403200	156	515431	Surrey Crescent	701	Western Bays Ward	7	Auckland City	02	Auckland Region	2.66461e+06	6.48074e+06	1	403200	2	914	51	1
271000	96	511700	Kelston Central	604	New Lynn Ward	6	Waitakere City	02	Auckland Region	2.6586e+06	6.47728e+06	1	271000	8	1056	43	3
534300	105	517600	St Lukes	703	Eden-Albert Ward	7	Auckland City	02	Auckland Region	2.66429e+06	6.47895e+06	1	534300	5	971	37	2
534001	66	517600	St Lukes	703	Eden-Albert Ward	7	Auckland City	02	Auckland Region	2.66419e+06	6.47919e+06	1	534001	5	965	23	2
534602	9	517600	St Lukes	703	Eden-Albert Ward	7	Auckland City	02	Auckland Region	2.66505e+06	6.47932e+06	1	534602	2	908	3	1
665101	150	522202	Papatoetoe Central	802	Papatoetoe Ward	8	Manukau City	02	Auckland Region	2.67638e+06	6.46795e+06	1	665101	8	1070	68	3
1582600	96	551502	Spotswood	3301	New Plymouth City Ward	33	New Plymouth District	07	Taranaki Region	2.60003e+06	6.23654e+06	1	1582600	8	1072	43	3
1581800	57	551501	Lynmouth	3301	New Plymouth City Ward	33	New Plymouth District	07	Taranaki Region	2.60122e+06	6.237e+06	1	1581800	6	977	20	2
1583202	42	551501	Lynmouth	3301	New Plymouth City Ward	33	New Plymouth District	07	Taranaki Region	2.60072e+06	6.237e+06	1	1583202	10	1196	19	3
1583100	132	551501	Lynmouth	3301	New Plymouth City Ward	33	New Plymouth District	07	Taranaki Region	2.60054e+06	6.23694e+06	1	1583100	5	964	46	2
2630500	168	595300	Hillmorton	6006	Spreydon-Heathcote Ward	60	Christchurch City	13	Canterbury Region	2.47638e+06	5.73834e+06	1	2630500	6	995	59	2
2120600	66	572900	Thorndon-Tinakori Road	4703	Lambton Ward	47	Wellington City	09	Wellington Region	2.65883e+06	5.99129e+06	1	2120600	3	934	22	1
2631000	123	595300	Hillmorton	6006	Spreydon-Heathcote Ward	60	Christchurch City	13	Canterbury Region	2.4768e+06	5.7384e+06	1	2631000	10	1193	55	3
533100	180	517600	St Lukes	703	Eden-Albert Ward	7	Auckland City	02	Auckland Region	2.66502e+06	6.47989e+06	1	533100	6	977	63	2
2631800	96	595300	Hillmorton	6006	Spreydon-Heathcote Ward	60	Christchurch City	13	Canterbury Region	2.47739e+06	5.73904e+06	1	2631800	5	955	34	2
2645000	81	595000	Spreydon	6006	Spreydon-Heathcote Ward	60	Christchurch City	13	Canterbury Region	2.48005e+06	5.73939e+06	1	2645000	7	1027	28	2
2499100	9	587830	Islington	6004	Riccarton-Wigram Ward	60	Christchurch City	13	Canterbury Region	2.47116e+06	5.7389e+06	1	2499100	3	921	3	1
1583000	90	551501	Lynmouth	3301	New Plymouth City Ward	33	New Plymouth District	07	Taranaki Region	2.6004e+06	6.2369e+06	1	1583000	9	1096	40	3
1582300	42	551501	Lynmouth	3301	New Plymouth City Ward	33	New Plymouth District	07	Taranaki Region	2.60098e+06	6.23692e+06	1	1582300	8	1066	19	3
2630800	219	595300	Hillmorton	6006	Spreydon-Heathcote Ward	60	Christchurch City	13	Canterbury Region	2.47652e+06	5.738e+06	1	2630800	9	1135	99	3
796700	177	525610	Papakura East	904	Red Hill Ward	9	Papakura District	02	Auckland Region	2.68468e+06	6.45844e+06	1	796700	10	1141	80	3
796800	96	525610	Papakura East	904	Red Hill Ward	9	Papakura District	02	Auckland Region	2.68487e+06	6.45849e+06	1	796800	10	1151	43	3
1451000	165	547001	Tamatea North	3199	Area Outside Ward	31	Napier City	06	Hawke's Bay Region	2.84298e+06	6.18131e+06	1	1451000	7	1009	58	2
533200	189	517600	St Lukes	703	Eden-Albert Ward	7	Auckland City	02	Auckland Region	2.66508e+06	6.47974e+06	1	533200	3	923	62	1
403100	156	515431	Surrey Crescent	701	Western Bays Ward	7	Auckland City	02	Auckland Region	2.66474e+06	6.48091e+06	1	403100	3	928	51	1
270800	144	511700	Kelston Central	604	New Lynn Ward	6	Waitakere City	02	Auckland Region	2.65911e+06	6.47725e+06	1	270800	5	971	50	2
139900	54	505500	Warkworth	401	Northern Ward	4	Rodney District	02	Auckland Region	2.6597e+06	6.53259e+06	1	139900	7	1005	19	2
533602	147	517600	St Lukes	703	Eden-Albert Ward	7	Auckland City	02	Auckland Region	2.66527e+06	6.47968e+06	1	533602	6	994	51	2
533700	90	517600	St Lukes	703	Eden-Albert Ward	7	Auckland City	02	Auckland Region	2.66523e+06	6.47946e+06	1	533700	5	959	31	2
534400	198	517600	St Lukes	703	Eden-Albert Ward	7	Auckland City	02	Auckland Region	2.66447e+06	6.47904e+06	1	534400	7	1000	69	2
2631500	129	595300	Hillmorton	6006	Spreydon-Heathcote Ward	60	Christchurch City	13	Canterbury Region	2.47704e+06	5.73857e+06	1	2631500	6	993	45	2
795900	153	525630	Papakura North East	902	Ardmore Ward	9	Papakura District	02	Auckland Region	2.68455e+06	6.45909e+06	1	795900	8	1059	69	3
795802	144	525630	Papakura North East	902	Ardmore Ward	9	Papakura District	02	Auckland Region	2.68441e+06	6.45896e+06	1	795802	5	964	50	2
796100	93	525630	Papakura North East	902	Ardmore Ward	9	Papakura District	02	Auckland Region	2.68483e+06	6.45909e+06	1	796100	10	1217	42	3
405900	57	515431	Surrey Crescent	701	Western Bays Ward	7	Auckland City	02	Auckland Region	2.66494e+06	6.48042e+06	1	405900	8	1050	26	3
275200	123	511601	Glendene North	603	Henderson Ward	6	Waitakere City	02	Auckland Region	2.65752e+06	6.47789e+06	1	275200	7	1009	43	2
2765000	75	598500	Geraldine	6401	Geraldine Ward	64	Timaru District	13	Canterbury Region	2.36937e+06	5.6765e+06	1	2765000	4	947	26	2
668901	99	522302	Papatoetoe East	802	Papatoetoe Ward	8	Manukau City	02	Auckland Region	2.67679e+06	6.46806e+06	1	668901	8	1067	45	3
406400	222	515431	Surrey Crescent	701	Western Bays Ward	7	Auckland City	02	Auckland Region	2.66496e+06	6.48024e+06	1	406400	9	1093	100	3
667400	123	522301	Dingwall	802	Papatoetoe Ward	8	Manukau City	02	Auckland Region	2.67638e+06	6.46822e+06	1	667400	7	1027	43	2
404000	150	515431	Surrey Crescent	701	Western Bays Ward	7	Auckland City	02	Auckland Region	2.66482e+06	6.48082e+06	1	404000	4	951	52	2
666301	30	522301	Dingwall	802	Papatoetoe Ward	8	Manukau City	02	Auckland Region	2.67616e+06	6.46887e+06	1	666301	7	1002	10	2
665800	111	522301	Dingwall	802	Papatoetoe Ward	8	Manukau City	02	Auckland Region	2.67566e+06	6.46907e+06	1	665800	6	991	39	2
1583600	54	551502	Spotswood	3301	New Plymouth City Ward	33	New Plymouth District	07	Taranaki Region	2.59973e+06	6.2367e+06	1	1583600	6	997	19	2
535100	165	517600	St Lukes	703	Eden-Albert Ward	7	Auckland City	02	Auckland Region	2.66468e+06	6.47881e+06	1	535100	6	990	58	2
2632300	186	595300	Hillmorton	6006	Spreydon-Heathcote Ward	60	Christchurch City	13	Canterbury Region	2.47669e+06	5.73781e+06	1	2632300	10	1143	84	3
2633300	81	595100	Hoon Hay	6006	Spreydon-Heathcote Ward	60	Christchurch City	13	Canterbury Region	2.47784e+06	5.73855e+06	1	2633300	5	962	28	2
2632900	120	595100	Hoon Hay	6006	Spreydon-Heathcote Ward	60	Christchurch City	13	Canterbury Region	2.47749e+06	5.73853e+06	1	2632900	6	996	42	2
2631900	231	595300	Hillmorton	6006	Spreydon-Heathcote Ward	60	Christchurch City	13	Canterbury Region	2.4774e+06	5.7387e+06	1	2631900	5	960	81	2
535700	162	517701	Sandringham North	703	Eden-Albert Ward	7	Auckland City	02	Auckland Region	2.66537e+06	6.4789e+06	1	535700	3	933	53	1
2895600	12	602900	Fernhill	7103	Cargill Ward	71	Dunedin City	14	Otago Region	2.31603e+06	5.47789e+06	1	2895600	7	1024	4	2
2895000	6	602800	Harbourside	7103	Cargill Ward	71	Dunedin City	14	Otago Region	2.31626e+06	5.47744e+06	1	2895000	9	1096	3	3
404800	24	515420	Grey Lynn East	701	Western Bays Ward	7	Auckland City	02	Auckland Region	2.66549e+06	6.48022e+06	1	404800	5	969	8	2
535300	123	517600	St Lukes	703	Eden-Albert Ward	7	Auckland City	02	Auckland Region	2.66475e+06	6.47861e+06	1	535300	5	966	43	2
405100	99	515431	Surrey Crescent	701	Western Bays Ward	7	Auckland City	02	Auckland Region	2.66474e+06	6.48054e+06	1	405100	8	1040	45	3
404900	69	515431	Surrey Crescent	701	Western Bays Ward	7	Auckland City	02	Auckland Region	2.66418e+06	6.48069e+06	1	404900	5	972	24	2
1583800	24	551502	Spotswood	3301	New Plymouth City Ward	33	New Plymouth District	07	Taranaki Region	2.59938e+06	6.23663e+06	1	1583800	6	997	8	2
1583400	123	551502	Spotswood	3301	New Plymouth City Ward	33	New Plymouth District	07	Taranaki Region	2.60008e+06	6.23705e+06	1	1583400	6	987	43	2
273500	66	511602	Glendene South	603	Henderson Ward	6	Waitakere City	02	Auckland Region	2.65848e+06	6.47793e+06	1	273500	7	1007	23	2
2633200	126	595100	Hoon Hay	6006	Spreydon-Heathcote Ward	60	Christchurch City	13	Canterbury Region	2.47756e+06	5.73841e+06	1	2633200	6	992	44	2
797600	81	525620	Massey Park	902	Ardmore Ward	9	Papakura District	02	Auckland Region	2.68368e+06	6.45793e+06	1	797600	7	1020	28	2
797400	219	525610	Papakura East	904	Red Hill Ward	9	Papakura District	02	Auckland Region	2.68443e+06	6.45862e+06	1	797400	10	1204	99	3
2895500	18	602900	Fernhill	7103	Cargill Ward	71	Dunedin City	14	Otago Region	2.31587e+06	5.47786e+06	1	2895500	7	1024	6	2
534900	75	517600	St Lukes	703	Eden-Albert Ward	7	Auckland City	02	Auckland Region	2.66456e+06	6.4789e+06	1	534900	7	1010	26	2
2763500	114	598500	Geraldine	6401	Geraldine Ward	64	Timaru District	13	Canterbury Region	2.36922e+06	5.67853e+06	1	2763500	3	929	38	1
2763000	111	598500	Geraldine	6401	Geraldine Ward	64	Timaru District	13	Canterbury Region	2.36957e+06	5.67878e+06	1	2763000	6	981	39	2
2763600	81	598500	Geraldine	6401	Geraldine Ward	64	Timaru District	13	Canterbury Region	2.36905e+06	5.67813e+06	1	2763600	7	1022	28	2
666800	30	522301	Dingwall	802	Papatoetoe Ward	8	Manukau City	02	Auckland Region	2.67612e+06	6.46869e+06	1	666800	9	1096	14	3
1584200	108	551502	Spotswood	3301	New Plymouth City Ward	33	New Plymouth District	07	Taranaki Region	2.5995e+06	6.23582e+06	1	1584200	3	935	36	1
666302	114	522301	Dingwall	802	Papatoetoe Ward	8	Manukau City	02	Auckland Region	2.67609e+06	6.46901e+06	1	666302	7	1002	40	2
404600	108	515410	Grey Lynn West	701	Western Bays Ward	7	Auckland City	02	Auckland Region	2.66545e+06	6.4806e+06	1	404600	7	1022	38	2
2763800	36	598500	Geraldine	6401	Geraldine Ward	64	Timaru District	13	Canterbury Region	2.36925e+06	5.67807e+06	1	2763800	7	1022	13	2
2763700	33	598500	Geraldine	6401	Geraldine Ward	64	Timaru District	13	Canterbury Region	2.36892e+06	5.67798e+06	1	2763700	7	1022	12	2
2764000	42	598500	Geraldine	6401	Geraldine Ward	64	Timaru District	13	Canterbury Region	2.36946e+06	5.6779e+06	1	2764000	5	961	15	2
666900	120	522301	Dingwall	802	Papatoetoe Ward	8	Manukau City	02	Auckland Region	2.67625e+06	6.4686e+06	1	666900	9	1096	54	3
2632201	126	595300	Hillmorton	6006	Spreydon-Heathcote Ward	60	Christchurch City	13	Canterbury Region	2.47689e+06	5.73792e+06	1	2632201	9	1127	57	3
2633000	141	595100	Hoon Hay	6006	Spreydon-Heathcote Ward	60	Christchurch City	13	Canterbury Region	2.47769e+06	5.73866e+06	1	2633000	4	952	49	2
797200	285	525620	Massey Park	902	Ardmore Ward	9	Papakura District	02	Auckland Region	2.68418e+06	6.4583e+06	1	797200	9	1097	128	3
797500	168	525610	Papakura East	904	Red Hill Ward	9	Papakura District	02	Auckland Region	2.68457e+06	6.45832e+06	1	797500	10	1155	76	3
403800	84	515410	Grey Lynn West	701	Western Bays Ward	7	Auckland City	02	Auckland Region	2.66511e+06	6.48097e+06	1	403800	4	936	29	2
2764400	33	598500	Geraldine	6401	Geraldine Ward	64	Timaru District	13	Canterbury Region	2.3687e+06	5.67729e+06	1	2764400	8	1068	15	3
536000	72	517701	Sandringham North	703	Eden-Albert Ward	7	Auckland City	02	Auckland Region	2.66498e+06	6.47863e+06	1	536000	7	1011	25	2
535600	285	517701	Sandringham North	703	Eden-Albert Ward	7	Auckland City	02	Auckland Region	2.66511e+06	6.47883e+06	1	535600	7	1011	100	2
535400	126	517600	St Lukes	703	Eden-Albert Ward	7	Auckland City	02	Auckland Region	2.66488e+06	6.47874e+06	1	535400	6	997	44	2
666200	105	522301	Dingwall	802	Papatoetoe Ward	8	Manukau City	02	Auckland Region	2.67598e+06	6.46887e+06	1	666200	8	1032	47	3
1583500	45	551502	Spotswood	3301	New Plymouth City Ward	33	New Plymouth District	07	Taranaki Region	2.59987e+06	6.23684e+06	1	1583500	6	987	16	2
1584000	102	551502	Spotswood	3301	New Plymouth City Ward	33	New Plymouth District	07	Taranaki Region	2.59928e+06	6.23663e+06	1	1584000	6	996	36	2
2633500	147	595100	Hoon Hay	6006	Spreydon-Heathcote Ward	60	Christchurch City	13	Canterbury Region	2.4777e+06	5.73818e+06	1	2633500	4	951	51	2
797000	129	525620	Massey Park	902	Ardmore Ward	9	Papakura District	02	Auckland Region	2.68384e+06	6.45822e+06	1	797000	8	1051	58	3
2895200	9	602800	Harbourside	7106	South Dunedin Ward	71	Dunedin City	14	Otago Region	2.31653e+06	5.47648e+06	1	2895200	9	1096	4	3
404500	90	515410	Grey Lynn West	701	Western Bays Ward	7	Auckland City	02	Auckland Region	2.66536e+06	6.48052e+06	1	404500	5	969	31	2
666000	69	522301	Dingwall	802	Papatoetoe Ward	8	Manukau City	02	Auckland Region	2.67591e+06	6.46917e+06	1	666000	7	1002	24	2
1583700	39	551502	Spotswood	3301	New Plymouth City Ward	33	New Plymouth District	07	Taranaki Region	2.59959e+06	6.23663e+06	1	1583700	6	997	14	2
403700	81	515410	Grey Lynn West	701	Western Bays Ward	7	Auckland City	02	Auckland Region	2.66521e+06	6.48098e+06	1	403700	5	956	28	2
665900	117	522301	Dingwall	802	Papatoetoe Ward	8	Manukau City	02	Auckland Region	2.67565e+06	6.46927e+06	1	665900	8	1041	53	3
274202	93	511601	Glendene North	603	Henderson Ward	6	Waitakere City	02	Auckland Region	2.65791e+06	6.47764e+06	1	274202	9	1120	42	3
403900	123	515410	Grey Lynn West	701	Western Bays Ward	7	Auckland City	02	Auckland Region	2.66498e+06	6.48096e+06	1	403900	4	936	43	2
404200	114	515410	Grey Lynn West	701	Western Bays Ward	7	Auckland City	02	Auckland Region	2.66513e+06	6.4808e+06	1	404200	5	969	40	2
272900	87	511602	Glendene South	603	Henderson Ward	6	Waitakere City	02	Auckland Region	2.65797e+06	6.47758e+06	1	272900	8	1045	39	3
666100	228	522301	Dingwall	802	Papatoetoe Ward	8	Manukau City	02	Auckland Region	2.67584e+06	6.46906e+06	1	666100	7	1018	80	2
535000	117	517600	St Lukes	703	Eden-Albert Ward	7	Auckland City	02	Auckland Region	2.66449e+06	6.47877e+06	1	535000	8	1048	53	3
1583900	180	551502	Spotswood	3301	New Plymouth City Ward	33	New Plymouth District	07	Taranaki Region	2.59941e+06	6.23651e+06	1	1583900	4	953	63	2
1583300	30	551501	Lynmouth	3301	New Plymouth City Ward	33	New Plymouth District	07	Taranaki Region	2.60043e+06	6.23652e+06	1	1583300	9	1096	14	3
2633400	168	595100	Hoon Hay	6006	Spreydon-Heathcote Ward	60	Christchurch City	13	Canterbury Region	2.47768e+06	5.73835e+06	1	2633400	5	966	59	2
2632000	12	595300	Hillmorton	6006	Spreydon-Heathcote Ward	60	Christchurch City	13	Canterbury Region	2.47767e+06	5.73884e+06	1	2632000	6	987	4	2
2633100	132	595100	Hoon Hay	6006	Spreydon-Heathcote Ward	60	Christchurch City	13	Canterbury Region	2.47789e+06	5.7387e+06	1	2633100	2	914	44	1
797300	228	525620	Massey Park	902	Ardmore Ward	9	Papakura District	02	Auckland Region	2.68434e+06	6.45843e+06	1	797300	9	1084	103	3
273000	192	511602	Glendene South	603	Henderson Ward	6	Waitakere City	02	Auckland Region	2.65816e+06	6.47749e+06	1	273000	5	972	67	2
535200	480	517600	St Lukes	703	Eden-Albert Ward	7	Auckland City	02	Auckland Region	2.66462e+06	6.47853e+06	1	535200	7	1005	168	2
404100	63	515410	Grey Lynn West	701	Western Bays Ward	7	Auckland City	02	Auckland Region	2.66499e+06	6.48081e+06	1	404100	5	969	22	2
404400	90	515410	Grey Lynn West	701	Western Bays Ward	7	Auckland City	02	Auckland Region	2.66526e+06	6.48067e+06	1	404400	5	966	31	2
666400	99	522301	Dingwall	802	Papatoetoe Ward	8	Manukau City	02	Auckland Region	2.67634e+06	6.46897e+06	1	666400	8	1032	45	3
1584103	198	551502	Spotswood	3301	New Plymouth City Ward	33	New Plymouth District	07	Taranaki Region	2.59932e+06	6.23624e+06	1	1584103	6	974	69	2
404700	45	515420	Grey Lynn East	701	Western Bays Ward	7	Auckland City	02	Auckland Region	2.66539e+06	6.48031e+06	1	404700	6	979	16	2
2632202	117	595300	Hillmorton	6006	Spreydon-Heathcote Ward	60	Christchurch City	13	Canterbury Region	2.4768e+06	5.73803e+06	1	2632202	7	1027	41	2
2632800	27	595100	Hoon Hay	6006	Spreydon-Heathcote Ward	60	Christchurch City	13	Canterbury Region	2.47737e+06	5.73843e+06	1	2632800	5	962	9	2
2632400	90	595100	Hoon Hay	6006	Spreydon-Heathcote Ward	60	Christchurch City	13	Canterbury Region	2.47737e+06	5.73819e+06	1	2632400	6	986	31	2
2120800	87	572900	Thorndon-Tinakori Road	4703	Lambton Ward	47	Wellington City	09	Wellington Region	2.65878e+06	5.99119e+06	1	2120800	3	934	29	1
797100	144	525620	Massey Park	902	Ardmore Ward	9	Papakura District	02	Auckland Region	2.68408e+06	6.45844e+06	1	797100	9	1075	65	3
405000	84	515431	Surrey Crescent	701	Western Bays Ward	7	Auckland City	02	Auckland Region	2.66442e+06	6.48061e+06	1	405000	5	972	29	2
2894800	27	602800	Harbourside	7103	Cargill Ward	71	Dunedin City	14	Otago Region	2.31657e+06	5.47819e+06	1	2894800	9	1096	12	3
2895300	24	602900	Fernhill	7103	Cargill Ward	71	Dunedin City	14	Otago Region	2.31616e+06	5.4781e+06	1	2895300	7	1024	8	2
404300	87	515410	Grey Lynn West	701	Western Bays Ward	7	Auckland City	02	Auckland Region	2.66522e+06	6.48082e+06	1	404300	5	966	30	2
2764500	69	598500	Geraldine	6401	Geraldine Ward	64	Timaru District	13	Canterbury Region	2.3692e+06	5.67753e+06	1	2764500	7	1008	24	2
2764200	78	598500	Geraldine	6401	Geraldine Ward	64	Timaru District	13	Canterbury Region	2.36898e+06	5.67778e+06	1	2764200	8	1068	35	3
2764300	36	598500	Geraldine	6401	Geraldine Ward	64	Timaru District	13	Canterbury Region	2.36907e+06	5.67772e+06	1	2764300	8	1068	16	3
2764100	153	598500	Geraldine	6401	Geraldine Ward	64	Timaru District	13	Canterbury Region	2.36876e+06	5.67767e+06	1	2764100	3	934	50	1
2763900	45	598500	Geraldine	6401	Geraldine Ward	64	Timaru District	13	Canterbury Region	2.36927e+06	5.67795e+06	1	2763900	5	961	16	2
274201	369	511601	Glendene North	603	Henderson Ward	6	Waitakere City	02	Auckland Region	2.65816e+06	6.47806e+06	1	274201	9	1120	166	3
667300	174	522301	Dingwall	802	Papatoetoe Ward	8	Manukau City	02	Auckland Region	2.67652e+06	6.46834e+06	1	667300	6	996	61	2
534800	57	517600	St Lukes	703	Eden-Albert Ward	7	Auckland City	02	Auckland Region	2.66484e+06	6.47902e+06	1	534800	7	1010	20	2
1203300	9	536821	Omanu	2301	Mount Maunganui-Papamoa Ward	23	Tauranga City	04	Bay of Plenty Region	2.79181e+06	6.3893e+06	1	1203300	9	1110	4	3
2895400	108	602900	Fernhill	7103	Cargill Ward	71	Dunedin City	14	Otago Region	2.31597e+06	5.47805e+06	1	2895400	7	1003	38	2
273600	141	511602	Glendene South	603	Henderson Ward	6	Waitakere City	02	Auckland Region	2.65821e+06	6.47758e+06	1	273600	9	1075	63	3
670600	171	522302	Papatoetoe East	802	Papatoetoe Ward	8	Manukau City	02	Auckland Region	2.67739e+06	6.46747e+06	1	670600	8	1064	77	3
667601	162	522301	Dingwall	802	Papatoetoe Ward	8	Manukau City	02	Auckland Region	2.67641e+06	6.46852e+06	1	667601	9	1073	73	3
2635700	27	595200	Hoon Hay South	6006	Spreydon-Heathcote Ward	60	Christchurch City	13	Canterbury Region	2.47901e+06	5.73694e+06	1	2635700	3	931	9	1
2635500	123	595200	Hoon Hay South	6006	Spreydon-Heathcote Ward	60	Christchurch City	13	Canterbury Region	2.47873e+06	5.7373e+06	1	2635500	3	927	41	1
2635801	33	595200	Hoon Hay South	6006	Spreydon-Heathcote Ward	60	Christchurch City	13	Canterbury Region	2.47835e+06	5.7375e+06	1	2635801	4	936	12	2
2635000	45	595200	Hoon Hay South	6006	Spreydon-Heathcote Ward	60	Christchurch City	13	Canterbury Region	2.47825e+06	5.73789e+06	1	2635000	3	932	15	1
2633900	87	595100	Hoon Hay	6006	Spreydon-Heathcote Ward	60	Christchurch City	13	Canterbury Region	2.47796e+06	5.73826e+06	1	2633900	3	920	29	1
799000	315	525610	Papakura East	904	Red Hill Ward	9	Papakura District	02	Auckland Region	2.68508e+06	6.45802e+06	1	799000	10	1250	142	3
799102	105	525610	Papakura East	904	Red Hill Ward	9	Papakura District	02	Auckland Region	2.68531e+06	6.4582e+06	1	799102	10	1342	47	3
798700	90	525610	Papakura East	904	Red Hill Ward	9	Papakura District	02	Auckland Region	2.68496e+06	6.45814e+06	1	798700	10	1231	40	3
274503	39	511601	Glendene North	603	Henderson Ward	6	Waitakere City	02	Auckland Region	2.65716e+06	6.47797e+06	1	274503	6	997	14	2
799200	96	525610	Papakura East	904	Red Hill Ward	9	Papakura District	02	Auckland Region	2.68486e+06	6.45888e+06	1	799200	9	1131	43	3
799400	198	525610	Papakura East	904	Red Hill Ward	9	Papakura District	02	Auckland Region	2.68512e+06	6.45893e+06	1	799400	10	1153	89	3
799300	153	525610	Papakura East	904	Red Hill Ward	9	Papakura District	02	Auckland Region	2.68495e+06	6.45883e+06	1	799300	9	1103	69	3
2896400	114	602900	Fernhill	7103	Cargill Ward	71	Dunedin City	14	Otago Region	2.31552e+06	5.47736e+06	1	2896400	10	1202	51	3
406100	129	515431	Surrey Crescent	701	Western Bays Ward	7	Auckland City	02	Auckland Region	2.66475e+06	6.48018e+06	1	406100	10	1540	58	3
275400	120	511601	Glendene North	603	Henderson Ward	6	Waitakere City	02	Auckland Region	2.65775e+06	6.47768e+06	1	275400	9	1087	54	3
274502	171	511601	Glendene North	603	Henderson Ward	6	Waitakere City	02	Auckland Region	2.6572e+06	6.47802e+06	1	274502	1	895	56	1
406000	153	515431	Surrey Crescent	701	Western Bays Ward	7	Auckland City	02	Auckland Region	2.66485e+06	6.48029e+06	1	406000	10	1246	69	3
2633800	138	595100	Hoon Hay	6006	Spreydon-Heathcote Ward	60	Christchurch City	13	Canterbury Region	2.47774e+06	5.73802e+06	1	2633800	2	910	46	1
799112	111	525610	Papakura East	904	Red Hill Ward	9	Papakura District	02	Auckland Region	2.68535e+06	6.45793e+06	1	799112	3	934	37	1
799113	72	525610	Papakura East	904	Red Hill Ward	9	Papakura District	02	Auckland Region	2.68558e+06	6.45791e+06	1	799113	6	998	25	2
2896900	60	602900	Fernhill	7103	Cargill Ward	71	Dunedin City	14	Otago Region	2.31575e+06	5.47784e+06	1	2896900	7	1000	21	2
274700	102	511601	Glendene North	603	Henderson Ward	6	Waitakere City	02	Auckland Region	2.65744e+06	6.47812e+06	1	274700	7	1023	36	2
405600	198	515432	St Lukes North	703	Eden-Albert Ward	7	Auckland City	02	Auckland Region	2.66454e+06	6.47979e+06	1	405600	3	933	65	1
406700	66	515431	Surrey Crescent	701	Western Bays Ward	7	Auckland City	02	Auckland Region	2.66502e+06	6.48011e+06	1	406700	5	966	23	2
2896600	87	602900	Fernhill	7103	Cargill Ward	71	Dunedin City	14	Otago Region	2.31548e+06	5.47716e+06	1	2896600	9	1134	39	3
406202	72	515432	St Lukes North	703	Eden-Albert Ward	7	Auckland City	02	Auckland Region	2.66471e+06	6.47994e+06	1	406202	8	1040	32	3
668902	54	522302	Papatoetoe East	802	Papatoetoe Ward	8	Manukau City	02	Auckland Region	2.6767e+06	6.46788e+06	1	668902	8	1067	24	3
668700	264	522302	Papatoetoe East	802	Papatoetoe Ward	8	Manukau City	02	Auckland Region	2.67652e+06	6.46809e+06	1	668700	9	1133	119	3
668801	114	522302	Papatoetoe East	802	Papatoetoe Ward	8	Manukau City	02	Auckland Region	2.67667e+06	6.46806e+06	1	668801	8	1039	51	3
1586100	30	551400	Moturoa	3301	New Plymouth City Ward	33	New Plymouth District	07	Taranaki Region	2.59969e+06	6.23733e+06	1	1586100	8	1032	14	3
1586400	132	551400	Moturoa	3301	New Plymouth City Ward	33	New Plymouth District	07	Taranaki Region	2.60019e+06	6.23736e+06	1	1586400	7	1008	46	2
406300	9	515431	Surrey Crescent	701	Western Bays Ward	7	Auckland City	02	Auckland Region	2.66466e+06	6.48012e+06	1	406300	8	1040	4	3
799114	99	525610	Papakura East	904	Red Hill Ward	9	Papakura District	02	Auckland Region	2.68557e+06	6.45824e+06	1	799114	9	1089	45	3
799800	90	525610	Papakura East	904	Red Hill Ward	9	Papakura District	02	Auckland Region	2.68508e+06	6.45839e+06	1	799800	10	1146	40	3
406502	63	515431	Surrey Crescent	701	Western Bays Ward	7	Auckland City	02	Auckland Region	2.66516e+06	6.48017e+06	1	406502	5	966	22	2
405400	150	515432	St Lukes North	703	Eden-Albert Ward	7	Auckland City	02	Auckland Region	2.66462e+06	6.47987e+06	1	405400	5	959	52	2
2764900	201	598500	Geraldine	6401	Geraldine Ward	64	Timaru District	13	Canterbury Region	2.36912e+06	5.67688e+06	1	2764900	6	982	70	2
2764700	150	598500	Geraldine	6401	Geraldine Ward	64	Timaru District	13	Canterbury Region	2.36907e+06	5.67717e+06	1	2764700	5	963	52	2
406800	87	515420	Grey Lynn East	701	Western Bays Ward	7	Auckland City	02	Auckland Region	2.66563e+06	6.48052e+06	1	406800	6	985	30	2
667602	21	522301	Dingwall	802	Papatoetoe Ward	8	Manukau City	02	Auckland Region	2.67631e+06	6.46836e+06	1	667602	9	1073	9	3
1585901	60	551400	Moturoa	3301	New Plymouth City Ward	33	New Plymouth District	07	Taranaki Region	2.5992e+06	6.23682e+06	1	1585901	5	953	21	2
1585902	24	551400	Moturoa	3301	New Plymouth City Ward	33	New Plymouth District	07	Taranaki Region	2.59929e+06	6.2368e+06	1	1585902	5	953	8	2
1586500	63	551400	Moturoa	3301	New Plymouth City Ward	33	New Plymouth District	07	Taranaki Region	2.60034e+06	6.2374e+06	1	1586500	7	1003	22	2
2634500	150	595100	Hoon Hay	6006	Spreydon-Heathcote Ward	60	Christchurch City	13	Canterbury Region	2.47857e+06	5.73824e+06	1	2634500	5	967	52	2
274300	75	511601	Glendene North	603	Henderson Ward	6	Waitakere City	02	Auckland Region	2.65789e+06	6.47801e+06	1	274300	7	1026	26	2
799108	111	525610	Papakura East	904	Red Hill Ward	9	Papakura District	02	Auckland Region	2.68544e+06	6.45826e+06	1	799108	9	1111	50	3
800000	141	525610	Papakura East	904	Red Hill Ward	9	Papakura District	02	Auckland Region	2.68513e+06	6.45826e+06	1	800000	9	1131	63	3
2896700	108	602900	Fernhill	7103	Cargill Ward	71	Dunedin City	14	Otago Region	2.31574e+06	5.478e+06	1	2896700	9	1099	49	3
2765100	69	598500	Geraldine	6401	Geraldine Ward	64	Timaru District	13	Canterbury Region	2.36952e+06	5.67614e+06	1	2765100	4	947	24	2
274800	105	511601	Glendene North	603	Henderson Ward	6	Waitakere City	02	Auckland Region	2.65771e+06	6.47797e+06	1	274800	5	965	37	2
274402	129	511601	Glendene North	603	Henderson Ward	6	Waitakere City	02	Auckland Region	2.65785e+06	6.47788e+06	1	274402	7	1010	45	2
1586202	18	551400	Moturoa	3301	New Plymouth City Ward	33	New Plymouth District	07	Taranaki Region	2.60007e+06	6.23724e+06	1	1586202	7	1003	6	2
1585400	126	551400	Moturoa	3301	New Plymouth City Ward	33	New Plymouth District	07	Taranaki Region	2.59961e+06	6.23701e+06	1	1585400	8	1039	57	3
1585100	87	551400	Moturoa	3301	New Plymouth City Ward	33	New Plymouth District	07	Taranaki Region	2.5992e+06	6.23715e+06	1	1585100	9	1091	39	3
2634800	123	595100	Hoon Hay	6006	Spreydon-Heathcote Ward	60	Christchurch City	13	Canterbury Region	2.47811e+06	5.73809e+06	1	2634800	6	994	43	2
2634400	138	595100	Hoon Hay	6006	Spreydon-Heathcote Ward	60	Christchurch City	13	Canterbury Region	2.47844e+06	5.73817e+06	1	2634400	6	983	48	2
799110	150	525610	Papakura East	904	Red Hill Ward	9	Papakura District	02	Auckland Region	2.68545e+06	6.45804e+06	1	799110	3	919	50	1
799109	156	525610	Papakura East	904	Red Hill Ward	9	Papakura District	02	Auckland Region	2.68543e+06	6.45814e+06	1	799109	10	1427	70	3
799500	255	525610	Papakura East	904	Red Hill Ward	9	Papakura District	02	Auckland Region	2.6852e+06	6.45873e+06	1	799500	9	1131	115	3
2896300	159	602900	Fernhill	7103	Cargill Ward	71	Dunedin City	14	Otago Region	2.3154e+06	5.47735e+06	1	2896300	10	1140	72	3
2502800	15	590604	Styx	6001	Shirley-Papanui Ward	60	Christchurch City	13	Canterbury Region	2.48172e+06	5.75395e+06	1	2502800	6	976	5	2
274401	132	511601	Glendene North	603	Henderson Ward	6	Waitakere City	02	Auckland Region	2.65789e+06	6.47774e+06	1	274401	4	949	46	2
1585200	135	551400	Moturoa	3301	New Plymouth City Ward	33	New Plymouth District	07	Taranaki Region	2.5996e+06	6.23743e+06	1	1585200	9	1133	61	3
1585000	120	551400	Moturoa	3301	New Plymouth City Ward	33	New Plymouth District	07	Taranaki Region	2.59933e+06	6.23741e+06	1	1585000	5	966	42	2
2634900	33	595100	Hoon Hay	6006	Spreydon-Heathcote Ward	60	Christchurch City	13	Canterbury Region	2.47833e+06	5.73807e+06	1	2634900	6	994	12	2
2633700	126	595100	Hoon Hay	6006	Spreydon-Heathcote Ward	60	Christchurch City	13	Canterbury Region	2.47809e+06	5.73837e+06	1	2633700	6	994	44	2
799700	237	525610	Papakura East	904	Red Hill Ward	9	Papakura District	02	Auckland Region	2.6852e+06	6.45848e+06	1	799700	10	1146	107	3
799600	117	525610	Papakura East	904	Red Hill Ward	9	Papakura District	02	Auckland Region	2.685e+06	6.4586e+06	1	799600	9	1131	53	3
799105	168	525610	Papakura East	904	Red Hill Ward	9	Papakura District	02	Auckland Region	2.68546e+06	6.45864e+06	1	799105	10	1418	76	3
2896500	93	602900	Fernhill	7103	Cargill Ward	71	Dunedin City	14	Otago Region	2.31538e+06	5.47716e+06	1	2896500	7	1024	33	2
2895700	18	602900	Fernhill	7103	Cargill Ward	71	Dunedin City	14	Otago Region	2.31584e+06	5.4777e+06	1	2895700	7	1024	6	2
2897100	114	602900	Fernhill	7103	Cargill Ward	71	Dunedin City	14	Otago Region	2.31556e+06	5.47777e+06	1	2897100	8	1048	51	3
274600	168	511601	Glendene North	603	Henderson Ward	6	Waitakere City	02	Auckland Region	2.65721e+06	6.47788e+06	1	274600	7	1014	59	2
275300	99	511601	Glendene North	603	Henderson Ward	6	Waitakere City	02	Auckland Region	2.65764e+06	6.47772e+06	1	275300	7	1009	35	2
668802	33	522302	Papatoetoe East	802	Papatoetoe Ward	8	Manukau City	02	Auckland Region	2.67653e+06	6.46791e+06	1	668802	8	1039	15	3
667500	123	522301	Dingwall	802	Papatoetoe Ward	8	Manukau City	02	Auckland Region	2.67624e+06	6.46843e+06	1	667500	10	1143	55	3
274501	138	511601	Glendene North	603	Henderson Ward	6	Waitakere City	02	Auckland Region	2.65708e+06	6.47816e+06	1	274501	6	997	48	2
1586300	12	551400	Moturoa	3301	New Plymouth City Ward	33	New Plymouth District	07	Taranaki Region	2.60004e+06	6.23762e+06	1	1586300	7	1003	4	2
405500	120	515432	St Lukes North	703	Eden-Albert Ward	7	Auckland City	02	Auckland Region	2.66432e+06	6.47978e+06	1	405500	4	938	42	2
406201	36	515431	Surrey Crescent	701	Western Bays Ward	7	Auckland City	02	Auckland Region	2.66476e+06	6.48011e+06	1	406201	8	1040	16	3
2633600	81	595100	Hoon Hay	6006	Spreydon-Heathcote Ward	60	Christchurch City	13	Canterbury Region	2.47773e+06	5.73829e+06	1	2633600	3	920	27	1
275000	171	511601	Glendene North	603	Henderson Ward	6	Waitakere City	02	Auckland Region	2.65727e+06	6.47775e+06	1	275000	6	974	60	2
799107	141	525610	Papakura East	904	Red Hill Ward	9	Papakura District	02	Auckland Region	2.68546e+06	6.45845e+06	1	799107	10	1154	63	3
799106	141	525610	Papakura East	904	Red Hill Ward	9	Papakura District	02	Auckland Region	2.68535e+06	6.45849e+06	1	799106	10	1183	63	3
799900	120	525610	Papakura East	904	Red Hill Ward	9	Papakura District	02	Auckland Region	2.68497e+06	6.45839e+06	1	799900	9	1133	54	3
405700	192	515432	St Lukes North	703	Eden-Albert Ward	7	Auckland City	02	Auckland Region	2.66452e+06	6.47967e+06	1	405700	2	899	63	1
2764600	39	598500	Geraldine	6401	Geraldine Ward	64	Timaru District	13	Canterbury Region	2.36891e+06	5.6775e+06	1	2764600	7	1008	14	2
2764800	123	598500	Geraldine	6401	Geraldine Ward	64	Timaru District	13	Canterbury Region	2.3695e+06	5.67679e+06	1	2764800	5	966	43	2
405300	156	515431	Surrey Crescent	701	Western Bays Ward	7	Auckland City	02	Auckland Region	2.66498e+06	6.4805e+06	1	405300	6	977	55	2
536400	114	517701	Sandringham North	703	Eden-Albert Ward	7	Auckland City	02	Auckland Region	2.66534e+06	6.47881e+06	1	536400	4	939	40	2
406600	162	515431	Surrey Crescent	701	Western Bays Ward	7	Auckland City	02	Auckland Region	2.66521e+06	6.48033e+06	1	406600	7	1015	57	2
668400	204	522302	Papatoetoe East	802	Papatoetoe Ward	8	Manukau City	02	Auckland Region	2.67668e+06	6.46832e+06	1	668400	9	1100	92	3
1586201	39	551400	Moturoa	3301	New Plymouth City Ward	33	New Plymouth District	07	Taranaki Region	2.59999e+06	6.23741e+06	1	1586201	7	1003	14	2
1585300	117	551400	Moturoa	3301	New Plymouth City Ward	33	New Plymouth District	07	Taranaki Region	2.59934e+06	6.23713e+06	1	1585300	8	1057	53	3
405800	117	515431	Surrey Crescent	701	Western Bays Ward	7	Auckland City	02	Auckland Region	2.66515e+06	6.48045e+06	1	405800	8	1050	53	3
406501	78	515431	Surrey Crescent	701	Western Bays Ward	7	Auckland City	02	Auckland Region	2.66515e+06	6.48028e+06	1	406501	5	966	27	2
274900	60	511601	Glendene North	603	Henderson Ward	6	Waitakere City	02	Auckland Region	2.65781e+06	6.47815e+06	1	274900	7	1023	21	2
541400	156	517702	Sandringham West	703	Eden-Albert Ward	7	Auckland City	02	Auckland Region	2.66494e+06	6.47715e+06	1	541400	8	1039	70	3
409900	51	515420	Grey Lynn East	701	Western Bays Ward	7	Auckland City	02	Auckland Region	2.66605e+06	6.48047e+06	1	409900	4	941	18	2
672101	132	522400	Puhinui	802	Papatoetoe Ward	8	Manukau City	02	Auckland Region	2.67637e+06	6.46681e+06	1	672101	6	995	46	2
541000	108	517702	Sandringham West	703	Eden-Albert Ward	7	Auckland City	02	Auckland Region	2.66486e+06	6.47749e+06	1	541000	7	1028	38	2
2635802	120	595200	Hoon Hay South	6006	Spreydon-Heathcote Ward	60	Christchurch City	13	Canterbury Region	2.47838e+06	5.73735e+06	1	2635802	4	936	42	2
1587200	120	551400	Moturoa	3301	New Plymouth City Ward	33	New Plymouth District	07	Taranaki Region	2.60106e+06	6.23773e+06	1	1587200	5	966	42	2
1587600	36	551400	Moturoa	3301	New Plymouth City Ward	33	New Plymouth District	07	Taranaki Region	2.60134e+06	6.2378e+06	1	1587600	8	1049	16	3
1587700	3	551400	Moturoa	3301	New Plymouth City Ward	33	New Plymouth District	07	Taranaki Region	2.59924e+06	6.23782e+06	1	1587700	8	1049	1	3
800307	111	525700	Red Hill	904	Red Hill Ward	9	Papakura District	02	Auckland Region	2.68549e+06	6.45725e+06	1	800307	10	1234	50	3
800303	165	525700	Red Hill	904	Red Hill Ward	9	Papakura District	02	Auckland Region	2.68567e+06	6.45719e+06	1	800303	10	1146	74	3
1194600	87	536810	Mt Maunganui North	2301	Mount Maunganui-Papamoa Ward	23	Tauranga City	04	Bay of Plenty Region	2.79075e+06	6.3915e+06	1	1194600	5	968	30	2
1194800	72	536810	Mt Maunganui North	2301	Mount Maunganui-Papamoa Ward	23	Tauranga City	04	Bay of Plenty Region	2.79084e+06	6.39141e+06	1	1194800	5	968	25	2
539500	36	517703	Sandringham East	703	Eden-Albert Ward	7	Auckland City	02	Auckland Region	2.66533e+06	6.47683e+06	1	539500	6	991	13	2
408000	66	515410	Grey Lynn West	701	Western Bays Ward	7	Auckland City	02	Auckland Region	2.66537e+06	6.4807e+06	1	408000	6	985	23	2
538800	105	517703	Sandringham East	703	Eden-Albert Ward	7	Auckland City	02	Auckland Region	2.66544e+06	6.4771e+06	1	538800	6	978	37	2
1194200	24	536810	Mt Maunganui North	2301	Mount Maunganui-Papamoa Ward	23	Tauranga City	04	Bay of Plenty Region	2.79057e+06	6.39181e+06	1	1194200	4	948	8	2
2636500	162	595200	Hoon Hay South	6006	Spreydon-Heathcote Ward	60	Christchurch City	13	Canterbury Region	2.47876e+06	5.73673e+06	1	2636500	3	926	53	1
2635100	102	595200	Hoon Hay South	6006	Spreydon-Heathcote Ward	60	Christchurch City	13	Canterbury Region	2.47834e+06	5.73773e+06	1	2635100	4	950	36	2
1587501	81	551400	Moturoa	3301	New Plymouth City Ward	33	New Plymouth District	07	Taranaki Region	2.6014e+06	6.23768e+06	1	1587501	8	1049	36	3
1586900	162	551400	Moturoa	3301	New Plymouth City Ward	33	New Plymouth District	07	Taranaki Region	2.60054e+06	6.23761e+06	1	1586900	5	956	57	2
407800	105	515410	Grey Lynn West	701	Western Bays Ward	7	Auckland City	02	Auckland Region	2.66561e+06	6.48095e+06	1	407800	3	919	35	1
406900	90	515420	Grey Lynn East	701	Western Bays Ward	7	Auckland City	02	Auckland Region	2.66556e+06	6.48046e+06	1	406900	5	969	31	2
407700	90	515420	Grey Lynn East	701	Western Bays Ward	7	Auckland City	02	Auckland Region	2.66571e+06	6.481e+06	1	407700	2	917	30	1
408200	69	515420	Grey Lynn East	701	Western Bays Ward	7	Auckland City	02	Auckland Region	2.66578e+06	6.48084e+06	1	408200	4	952	24	2
407600	96	515410	Grey Lynn West	701	Western Bays Ward	7	Auckland City	02	Auckland Region	2.6654e+06	6.48124e+06	1	407600	4	952	34	2
1588200	156	551900	Kawaroa	3301	New Plymouth City Ward	33	New Plymouth District	07	Taranaki Region	2.60182e+06	6.238e+06	1	1588200	7	1027	55	2
1588100	165	551900	Kawaroa	3301	New Plymouth City Ward	33	New Plymouth District	07	Taranaki Region	2.6016e+06	6.23793e+06	1	1588100	6	986	58	2
800313	114	525700	Red Hill	904	Red Hill Ward	9	Papakura District	02	Auckland Region	2.68559e+06	6.45774e+06	1	800313	10	1185	51	3
800314	111	525700	Red Hill	904	Red Hill Ward	9	Papakura District	02	Auckland Region	2.68552e+06	6.45769e+06	1	800314	10	1368	50	3
407100	63	515420	Grey Lynn East	701	Western Bays Ward	7	Auckland City	02	Auckland Region	2.66556e+06	6.48028e+06	1	407100	6	979	22	2
1194500	165	536810	Mt Maunganui North	2301	Mount Maunganui-Papamoa Ward	23	Tauranga City	04	Bay of Plenty Region	2.79074e+06	6.39165e+06	1	1194500	4	948	58	2
407300	69	515420	Grey Lynn East	701	Western Bays Ward	7	Auckland City	02	Auckland Region	2.66574e+06	6.48038e+06	1	407300	5	969	24	2
538900	102	517703	Sandringham East	703	Eden-Albert Ward	7	Auckland City	02	Auckland Region	2.66513e+06	6.47701e+06	1	538900	6	981	36	2
408500	174	515410	Grey Lynn West	701	Western Bays Ward	7	Auckland City	02	Auckland Region	2.66549e+06	6.48122e+06	1	408500	4	944	61	2
2636000	72	595200	Hoon Hay South	6006	Spreydon-Heathcote Ward	60	Christchurch City	13	Canterbury Region	2.47848e+06	5.73706e+06	1	2636000	3	931	24	1
1586700	102	551400	Moturoa	3301	New Plymouth City Ward	33	New Plymouth District	07	Taranaki Region	2.60068e+06	6.23745e+06	1	1586700	9	1112	46	3
1587400	30	551400	Moturoa	3301	New Plymouth City Ward	33	New Plymouth District	07	Taranaki Region	2.60133e+06	6.23754e+06	1	1587400	5	956	10	2
538700	141	517703	Sandringham East	703	Eden-Albert Ward	7	Auckland City	02	Auckland Region	2.66521e+06	6.47709e+06	1	538700	10	1149	63	3
407500	72	515410	Grey Lynn West	701	Western Bays Ward	7	Auckland City	02	Auckland Region	2.66528e+06	6.48128e+06	1	407500	4	952	25	2
2636800	228	594900	Barrington South	6006	Spreydon-Heathcote Ward	60	Christchurch City	13	Canterbury Region	2.47904e+06	5.73826e+06	1	2636800	3	928	75	1
800310	144	525700	Red Hill	904	Red Hill Ward	9	Papakura District	02	Auckland Region	2.68546e+06	6.45752e+06	1	800310	10	1397	65	3
800315	111	525700	Red Hill	904	Red Hill Ward	9	Papakura District	02	Auckland Region	2.68571e+06	6.4575e+06	1	800315	10	1238	50	3
2897400	144	602900	Fernhill	7103	Cargill Ward	71	Dunedin City	14	Otago Region	2.31536e+06	5.47754e+06	1	2897400	6	996	50	2
539600	39	517703	Sandringham East	703	Eden-Albert Ward	7	Auckland City	02	Auckland Region	2.66537e+06	6.47682e+06	1	539600	6	991	14	2
407900	159	515410	Grey Lynn West	701	Western Bays Ward	7	Auckland City	02	Auckland Region	2.66538e+06	6.48082e+06	1	407900	6	997	56	2
407000	75	515420	Grey Lynn East	701	Western Bays Ward	7	Auckland City	02	Auckland Region	2.66548e+06	6.48039e+06	1	407000	5	969	26	2
538300	108	517703	Sandringham East	703	Eden-Albert Ward	7	Auckland City	02	Auckland Region	2.66526e+06	6.47743e+06	1	538300	4	946	38	2
1586600	57	551400	Moturoa	3301	New Plymouth City Ward	33	New Plymouth District	07	Taranaki Region	2.60045e+06	6.23734e+06	1	1586600	9	1112	26	3
2635900	129	595200	Hoon Hay South	6006	Spreydon-Heathcote Ward	60	Christchurch City	13	Canterbury Region	2.47854e+06	5.73742e+06	1	2635900	4	952	45	2
2635200	189	595200	Hoon Hay South	6006	Spreydon-Heathcote Ward	60	Christchurch City	13	Canterbury Region	2.47846e+06	5.73778e+06	1	2635200	4	946	66	2
800311	66	525700	Red Hill	904	Red Hill Ward	9	Papakura District	02	Auckland Region	2.68562e+06	6.45745e+06	1	800311	10	1390	30	3
2897600	3	602900	Fernhill	7103	Cargill Ward	71	Dunedin City	14	Otago Region	2.31558e+06	5.47749e+06	1	2897600	9	1108	1	3
1194700	60	536810	Mt Maunganui North	2301	Mount Maunganui-Papamoa Ward	23	Tauranga City	04	Bay of Plenty Region	2.79098e+06	6.39154e+06	1	1194700	5	968	21	2
408400	39	515410	Grey Lynn West	701	Western Bays Ward	7	Auckland City	02	Auckland Region	2.66527e+06	6.48099e+06	1	408400	6	997	14	2
408100	153	515410	Grey Lynn West	701	Western Bays Ward	7	Auckland City	02	Auckland Region	2.66561e+06	6.48067e+06	1	408100	4	940	54	2
408600	84	515410	Grey Lynn West	701	Western Bays Ward	7	Auckland City	02	Auckland Region	2.66559e+06	6.48118e+06	1	408600	3	919	28	1
276101	24	511800	Sunnyvale	603	Henderson Ward	6	Waitakere City	02	Auckland Region	2.65683e+06	6.47783e+06	1	276101	5	959	8	2
2636400	99	595200	Hoon Hay South	6006	Spreydon-Heathcote Ward	60	Christchurch City	13	Canterbury Region	2.47881e+06	5.73689e+06	1	2636400	2	906	33	1
2636300	33	595200	Hoon Hay South	6006	Spreydon-Heathcote Ward	60	Christchurch City	13	Canterbury Region	2.47859e+06	5.73686e+06	1	2636300	2	906	11	1
407200	48	515420	Grey Lynn East	701	Western Bays Ward	7	Auckland City	02	Auckland Region	2.66565e+06	6.48032e+06	1	407200	5	969	17	2
2636700	141	594900	Barrington South	6006	Spreydon-Heathcote Ward	60	Christchurch City	13	Canterbury Region	2.4793e+06	5.73849e+06	1	2636700	8	1036	63	3
1194900	96	536810	Mt Maunganui North	2301	Mount Maunganui-Papamoa Ward	23	Tauranga City	04	Bay of Plenty Region	2.79093e+06	6.39133e+06	1	1194900	5	974	34	2
681328	96	522722	Aberfeldy	806	Howick Ward	8	Manukau City	02	Auckland Region	2.68056e+06	6.47535e+06	1	681328	4	936	34	2
669601	120	522302	Papatoetoe East	802	Papatoetoe Ward	8	Manukau City	02	Auckland Region	2.6769e+06	6.468e+06	1	669601	8	1050	54	3
2635300	120	595200	Hoon Hay South	6006	Spreydon-Heathcote Ward	60	Christchurch City	13	Canterbury Region	2.47831e+06	5.73761e+06	1	2635300	3	932	40	1
407400	99	515420	Grey Lynn East	701	Western Bays Ward	7	Auckland City	02	Auckland Region	2.66583e+06	6.48042e+06	1	407400	5	954	35	2
1195000	69	536810	Mt Maunganui North	2301	Mount Maunganui-Papamoa Ward	23	Tauranga City	04	Bay of Plenty Region	2.79093e+06	6.39115e+06	1	1195000	5	974	24	2
539400	90	517703	Sandringham East	703	Eden-Albert Ward	7	Auckland City	02	Auckland Region	2.66526e+06	6.47684e+06	1	539400	10	1152	40	3
408300	78	515420	Grey Lynn East	701	Western Bays Ward	7	Auckland City	02	Auckland Region	2.66587e+06	6.48089e+06	1	408300	4	952	27	2
276102	45	511800	Sunnyvale	603	Henderson Ward	6	Waitakere City	02	Auckland Region	2.65693e+06	6.47784e+06	1	276102	5	959	16	2
2636100	144	595200	Hoon Hay South	6006	Spreydon-Heathcote Ward	60	Christchurch City	13	Canterbury Region	2.47855e+06	5.73712e+06	1	2636100	4	947	50	2
2636200	156	595200	Hoon Hay South	6006	Spreydon-Heathcote Ward	60	Christchurch City	13	Canterbury Region	2.4787e+06	5.73711e+06	1	2636200	6	977	55	2
1586800	120	551400	Moturoa	3301	New Plymouth City Ward	33	New Plymouth District	07	Taranaki Region	2.60064e+06	6.23755e+06	1	1586800	7	1023	42	2
1587502	18	551501	Lynmouth	3301	New Plymouth City Ward	33	New Plymouth District	07	Taranaki Region	2.60151e+06	6.23758e+06	1	1587502	8	1049	8	3
2635400	243	595200	Hoon Hay South	6006	Spreydon-Heathcote Ward	60	Christchurch City	13	Canterbury Region	2.47858e+06	5.73781e+06	1	2635400	3	930	80	1
1587800	3	551400	Moturoa	3301	New Plymouth City Ward	33	New Plymouth District	07	Taranaki Region	2.59933e+06	6.23805e+06	1	1587800	8	1049	1	3
276700	63	511800	Sunnyvale	603	Henderson Ward	6	Waitakere City	02	Auckland Region	2.65676e+06	6.47782e+06	1	276700	5	964	22	2
800308	87	525700	Red Hill	904	Red Hill Ward	9	Papakura District	02	Auckland Region	2.68532e+06	6.45769e+06	1	800308	10	1282	39	3
800309	78	525700	Red Hill	904	Red Hill Ward	9	Papakura District	02	Auckland Region	2.68535e+06	6.45754e+06	1	800309	10	1390	35	3
538500	213	517703	Sandringham East	703	Eden-Albert Ward	7	Auckland City	02	Auckland Region	2.6653e+06	6.4773e+06	1	538500	10	1165	96	3
2897500	132	602900	Fernhill	7103	Cargill Ward	71	Dunedin City	14	Otago Region	2.31556e+06	5.47765e+06	1	2897500	9	1108	59	3
1194400	96	536810	Mt Maunganui North	2301	Mount Maunganui-Papamoa Ward	23	Tauranga City	04	Bay of Plenty Region	2.7906e+06	6.3916e+06	1	1194400	8	1034	43	3
538600	156	517703	Sandringham East	703	Eden-Albert Ward	7	Auckland City	02	Auckland Region	2.66528e+06	6.47717e+06	1	538600	8	1042	70	3
669300	159	522302	Papatoetoe East	802	Papatoetoe Ward	8	Manukau City	02	Auckland Region	2.67723e+06	6.46758e+06	1	669300	8	1059	72	3
2635600	90	595200	Hoon Hay South	6006	Spreydon-Heathcote Ward	60	Christchurch City	13	Canterbury Region	2.47888e+06	5.73708e+06	1	2635600	3	931	30	1
2901000	3	603100	Stuart St-Frederick St	7103	Cargill Ward	71	Dunedin City	14	Otago Region	2.31627e+06	5.47864e+06	1	2901000	9	1128	1	3
2902300	45	603100	Stuart St-Frederick St	7103	Cargill Ward	71	Dunedin City	14	Otago Region	2.31621e+06	5.47913e+06	1	2902300	9	1109	20	3
674200	150	524601	Manukau Central	802	Papatoetoe Ward	8	Manukau City	02	Auckland Region	2.67573e+06	6.46617e+06	1	674200	10	1145	68	3
409400	81	515420	Grey Lynn East	701	Western Bays Ward	7	Auckland City	02	Auckland Region	2.6658e+06	6.48064e+06	1	409400	4	937	28	2
1588700	105	551900	Kawaroa	3301	New Plymouth City Ward	33	New Plymouth District	07	Taranaki Region	2.60168e+06	6.23773e+06	1	1588700	7	1012	37	2
1588300	75	551900	Kawaroa	3301	New Plymouth City Ward	33	New Plymouth District	07	Taranaki Region	2.60205e+06	6.23812e+06	1	1588300	8	1037	34	3
1195400	195	536810	Mt Maunganui North	2301	Mount Maunganui-Papamoa Ward	23	Tauranga City	04	Bay of Plenty Region	2.79136e+06	6.39128e+06	1	1195400	4	951	68	2
1196200	183	536810	Mt Maunganui North	2301	Mount Maunganui-Papamoa Ward	23	Tauranga City	04	Bay of Plenty Region	2.79161e+06	6.39047e+06	1	1196200	7	1012	64	2
1196400	159	536810	Mt Maunganui North	2301	Mount Maunganui-Papamoa Ward	23	Tauranga City	04	Bay of Plenty Region	2.79217e+06	6.39024e+06	1	1196400	5	954	56	2
2900000	66	603000	High St-Stuart St	7103	Cargill Ward	71	Dunedin City	14	Otago Region	2.31596e+06	5.47851e+06	1	2900000	7	1026	23	2
672400	126	522400	Puhinui	802	Papatoetoe Ward	8	Manukau City	02	Auckland Region	2.67614e+06	6.46671e+06	1	672400	5	971	44	2
2636900	252	594900	Barrington South	6006	Spreydon-Heathcote Ward	60	Christchurch City	13	Canterbury Region	2.47933e+06	5.73832e+06	1	2636900	5	955	88	2
1196500	258	536810	Mt Maunganui North	2301	Mount Maunganui-Papamoa Ward	23	Tauranga City	04	Bay of Plenty Region	2.79208e+06	6.39017e+06	1	1196500	3	928	85	1
1195200	69	536810	Mt Maunganui North	2301	Mount Maunganui-Papamoa Ward	23	Tauranga City	04	Bay of Plenty Region	2.79117e+06	6.39114e+06	1	1195200	5	960	24	2
1195100	39	536810	Mt Maunganui North	2301	Mount Maunganui-Papamoa Ward	23	Tauranga City	04	Bay of Plenty Region	2.79104e+06	6.39119e+06	1	1195100	5	960	14	2
410000	168	515420	Grey Lynn East	701	Western Bays Ward	7	Auckland City	02	Auckland Region	2.66609e+06	6.48059e+06	1	410000	5	971	59	2
2899700	48	603000	High St-Stuart St	7103	Cargill Ward	71	Dunedin City	14	Otago Region	2.3162e+06	5.47838e+06	1	2899700	7	1026	17	2
2899300	102	603000	High St-Stuart St	7103	Cargill Ward	71	Dunedin City	14	Otago Region	2.31592e+06	5.47839e+06	1	2899300	7	1009	36	2
2361900	102	584201	Richmond East	5105	Richmond Ward	51	Tasman District	16	Tasman Region	2.52608e+06	5.98527e+06	1	2361900	7	1002	36	2
672200	162	522400	Puhinui	802	Papatoetoe Ward	8	Manukau City	02	Auckland Region	2.67612e+06	6.46693e+06	1	672200	8	1062	73	3
409700	96	515420	Grey Lynn East	701	Western Bays Ward	7	Auckland City	02	Auckland Region	2.66591e+06	6.48048e+06	1	409700	4	941	34	2
541100	237	517702	Sandringham West	703	Eden-Albert Ward	7	Auckland City	02	Auckland Region	2.66466e+06	6.47734e+06	1	541100	6	987	83	2
1497600	105	548000	Mayfair	3005	Hastings Ward	30	Hastings District	06	Hawke's Bay Region	2.84107e+06	6.16682e+06	1	1497600	6	996	37	2
408800	78	515420	Grey Lynn East	701	Western Bays Ward	7	Auckland City	02	Auckland Region	2.6658e+06	6.48118e+06	1	408800	2	906	26	1
1588400	108	551900	Kawaroa	3301	New Plymouth City Ward	33	New Plymouth District	07	Taranaki Region	2.60207e+06	6.23802e+06	1	1588400	8	1057	49	3
1196700	255	536810	Mt Maunganui North	2301	Mount Maunganui-Papamoa Ward	23	Tauranga City	04	Bay of Plenty Region	2.79199e+06	6.39001e+06	1	1196700	5	958	89	2
1195600	48	536810	Mt Maunganui North	2301	Mount Maunganui-Papamoa Ward	23	Tauranga City	04	Bay of Plenty Region	2.79111e+06	6.39098e+06	1	1195600	4	942	17	2
1195500	63	536810	Mt Maunganui North	2301	Mount Maunganui-Papamoa Ward	23	Tauranga City	04	Bay of Plenty Region	2.791e+06	6.39095e+06	1	1195500	4	942	22	2
2899800	42	603000	High St-Stuart St	7103	Cargill Ward	71	Dunedin City	14	Otago Region	2.31629e+06	5.47839e+06	1	2899800	7	1022	15	2
408900	87	515420	Grey Lynn East	701	Western Bays Ward	7	Auckland City	02	Auckland Region	2.6659e+06	6.48119e+06	1	408900	2	906	29	1
2769100	48	598000	Winchester	6403	Temuka Ward	64	Timaru District	13	Canterbury Region	2.37244e+06	5.66759e+06	1	2769100	3	928	16	1
2769000	39	598000	Winchester	6403	Temuka Ward	64	Timaru District	13	Canterbury Region	2.37231e+06	5.66745e+06	1	2769000	3	928	13	1
2768900	117	598000	Winchester	6403	Temuka Ward	64	Timaru District	13	Canterbury Region	2.37245e+06	5.66791e+06	1	2768900	6	979	41	2
409500	96	515420	Grey Lynn East	701	Western Bays Ward	7	Auckland City	02	Auckland Region	2.66588e+06	6.4807e+06	1	409500	4	937	34	2
671400	132	522400	Puhinui	802	Papatoetoe Ward	8	Manukau City	02	Auckland Region	2.67699e+06	6.46734e+06	1	671400	4	945	46	2
2745801	12	597741	Chertsey	6302	Rakaia Ward	63	Ashburton District	13	Canterbury Region	2.41725e+06	5.70626e+06	1	2745801	2	915	4	1
278006	57	512901	Parrs Park	602	Waitakere Ward	6	Waitakere City	02	Auckland Region	2.65514e+06	6.4764e+06	1	278006	9	1099	26	3
278300	282	512901	Parrs Park	602	Waitakere Ward	6	Waitakere City	02	Auckland Region	2.65528e+06	6.47555e+06	1	278300	5	954	99	2
1589700	180	551900	Kawaroa	3301	New Plymouth City Ward	33	New Plymouth District	07	Taranaki Region	2.60179e+06	6.23735e+06	1	1589700	1	896	59	1
1589300	78	551900	Kawaroa	3301	New Plymouth City Ward	33	New Plymouth District	07	Taranaki Region	2.60219e+06	6.23754e+06	1	1589300	8	1037	35	3
1588500	96	551900	Kawaroa	3301	New Plymouth City Ward	33	New Plymouth District	07	Taranaki Region	2.60212e+06	6.23794e+06	1	1588500	9	1123	43	3
2637200	207	594900	Barrington South	6006	Spreydon-Heathcote Ward	60	Christchurch City	13	Canterbury Region	2.47926e+06	5.73814e+06	1	2637200	3	933	68	1
2507101	33	590502	Marshland	6001	Shirley-Papanui Ward	60	Christchurch City	13	Canterbury Region	2.48178e+06	5.74619e+06	1	2507101	5	961	12	2
2507000	42	590502	Marshland	6001	Shirley-Papanui Ward	60	Christchurch City	13	Canterbury Region	2.48215e+06	5.74662e+06	1	2507000	4	942	15	2
1196000	93	536810	Mt Maunganui North	2301	Mount Maunganui-Papamoa Ward	23	Tauranga City	04	Bay of Plenty Region	2.79144e+06	6.39075e+06	1	1196000	6	977	33	2
1196300	192	536810	Mt Maunganui North	2301	Mount Maunganui-Papamoa Ward	23	Tauranga City	04	Bay of Plenty Region	2.7918e+06	6.39058e+06	1	1196300	4	938	67	2
278404	183	512901	Parrs Park	602	Waitakere Ward	6	Waitakere City	02	Auckland Region	2.65552e+06	6.47557e+06	1	278404	8	1033	82	3
409100	72	515420	Grey Lynn East	701	Western Bays Ward	7	Auckland City	02	Auckland Region	2.66611e+06	6.48122e+06	1	409100	2	917	24	1
540900	66	517702	Sandringham West	703	Eden-Albert Ward	7	Auckland City	02	Auckland Region	2.66512e+06	6.4775e+06	1	540900	8	1057	30	3
541200	198	517702	Sandringham West	703	Eden-Albert Ward	7	Auckland City	02	Auckland Region	2.66479e+06	6.47728e+06	1	541200	4	952	69	2
540800	207	517702	Sandringham West	703	Eden-Albert Ward	7	Auckland City	02	Auckland Region	2.66494e+06	6.47758e+06	1	540800	8	1037	93	3
1589600	81	551900	Kawaroa	3301	New Plymouth City Ward	33	New Plymouth District	07	Taranaki Region	2.60193e+06	6.23723e+06	1	1589600	8	1055	36	3
1589500	39	551900	Kawaroa	3301	New Plymouth City Ward	33	New Plymouth District	07	Taranaki Region	2.60203e+06	6.23737e+06	1	1589500	5	965	14	2
2638100	162	594900	Barrington South	6006	Spreydon-Heathcote Ward	60	Christchurch City	13	Canterbury Region	2.47895e+06	5.73726e+06	1	2638100	2	918	53	1
1588600	126	551900	Kawaroa	3301	New Plymouth City Ward	33	New Plymouth District	07	Taranaki Region	2.60188e+06	6.2378e+06	1	1588600	8	1068	57	3
1589000	63	551900	Kawaroa	3301	New Plymouth City Ward	33	New Plymouth District	07	Taranaki Region	2.60211e+06	6.23778e+06	1	1589000	7	1027	22	2
2507102	153	590502	Marshland	6001	Shirley-Papanui Ward	60	Christchurch City	13	Canterbury Region	2.48203e+06	5.74594e+06	1	2507102	5	961	54	2
409300	87	515420	Grey Lynn East	701	Western Bays Ward	7	Auckland City	02	Auckland Region	2.66572e+06	6.48058e+06	1	409300	4	951	30	2
671500	201	522400	Puhinui	802	Papatoetoe Ward	8	Manukau City	02	Auckland Region	2.67702e+06	6.46711e+06	1	671500	7	1003	70	2
410200	42	515420	Grey Lynn East	701	Western Bays Ward	7	Auckland City	02	Auckland Region	2.66592e+06	6.48105e+06	1	410200	5	959	15	2
278007	192	512901	Parrs Park	602	Waitakere Ward	6	Waitakere City	02	Auckland Region	2.65498e+06	6.47634e+06	1	278007	9	1099	86	3
1195300	108	536810	Mt Maunganui North	2301	Mount Maunganui-Papamoa Ward	23	Tauranga City	04	Bay of Plenty Region	2.79127e+06	6.3912e+06	1	1195300	2	907	36	1
2899900	27	603000	High St-Stuart St	7103	Cargill Ward	71	Dunedin City	14	Otago Region	2.31609e+06	5.47847e+06	1	2899900	7	1022	9	2
2899200	90	603000	High St-Stuart St	7103	Cargill Ward	71	Dunedin City	14	Otago Region	2.31586e+06	5.47828e+06	1	2899200	7	1026	31	2
671700	231	524601	Manukau Central	802	Papatoetoe Ward	8	Manukau City	02	Auckland Region	2.67713e+06	6.46701e+06	1	671700	9	1084	104	3
1510100	66	548831	Te Mata	3008	Havelock North Ward	30	Hastings District	06	Hawke's Bay Region	2.84413e+06	6.16352e+06	1	1510100	5	970	23	2
671100	93	522400	Puhinui	802	Papatoetoe Ward	8	Manukau City	02	Auckland Region	2.67719e+06	6.4674e+06	1	671100	8	1065	42	3
541300	129	517702	Sandringham West	703	Eden-Albert Ward	7	Auckland City	02	Auckland Region	2.66502e+06	6.47726e+06	1	541300	6	988	45	2
278901	186	512901	Parrs Park	602	Waitakere Ward	6	Waitakere City	02	Auckland Region	2.65513e+06	6.47581e+06	1	278901	5	958	65	2
410300	66	515420	Grey Lynn East	701	Western Bays Ward	7	Auckland City	02	Auckland Region	2.66595e+06	6.48094e+06	1	410300	3	934	22	1
278510	222	512901	Parrs Park	602	Waitakere Ward	6	Waitakere City	02	Auckland Region	2.65574e+06	6.47562e+06	1	278510	10	1280	100	3
409000	72	515420	Grey Lynn East	701	Western Bays Ward	7	Auckland City	02	Auckland Region	2.666e+06	6.4812e+06	1	409000	3	925	24	1
2121600	108	572900	Thorndon-Tinakori Road	4703	Lambton Ward	47	Wellington City	09	Wellington Region	2.6584e+06	5.99063e+06	1	2121600	5	956	38	2
1589100	36	551900	Kawaroa	3301	New Plymouth City Ward	33	New Plymouth District	07	Taranaki Region	2.60215e+06	6.23762e+06	1	1589100	9	1123	16	3
1589800	60	551900	Kawaroa	3301	New Plymouth City Ward	33	New Plymouth District	07	Taranaki Region	2.60242e+06	6.23763e+06	1	1589800	8	1037	27	3
1588900	72	551900	Kawaroa	3301	New Plymouth City Ward	33	New Plymouth District	07	Taranaki Region	2.60195e+06	6.23766e+06	1	1588900	8	1055	32	3
2637000	120	594900	Barrington South	6006	Spreydon-Heathcote Ward	60	Christchurch City	13	Canterbury Region	2.47901e+06	5.73805e+06	1	2637000	8	1070	54	3
2637100	36	594900	Barrington South	6006	Spreydon-Heathcote Ward	60	Christchurch City	13	Canterbury Region	2.47884e+06	5.73804e+06	1	2637100	8	1070	16	3
1196600	192	536810	Mt Maunganui North	2301	Mount Maunganui-Papamoa Ward	23	Tauranga City	04	Bay of Plenty Region	2.79181e+06	6.39023e+06	1	1196600	3	934	63	1
1195800	84	536810	Mt Maunganui North	2301	Mount Maunganui-Papamoa Ward	23	Tauranga City	04	Bay of Plenty Region	2.79159e+06	6.39095e+06	1	1195800	5	963	29	2
410100	87	515420	Grey Lynn East	701	Western Bays Ward	7	Auckland City	02	Auckland Region	2.66581e+06	6.48103e+06	1	410100	5	959	30	2
278005	207	512901	Parrs Park	602	Waitakere Ward	6	Waitakere City	02	Auckland Region	2.65501e+06	6.47651e+06	1	278005	9	1134	93	3
1589200	132	551900	Kawaroa	3301	New Plymouth City Ward	33	New Plymouth District	07	Taranaki Region	2.602e+06	6.23754e+06	1	1589200	7	1009	46	2
1589900	57	551900	Kawaroa	3301	New Plymouth City Ward	33	New Plymouth District	07	Taranaki Region	2.60245e+06	6.23754e+06	1	1589900	7	1008	20	2
1196100	108	536810	Mt Maunganui North	2301	Mount Maunganui-Papamoa Ward	23	Tauranga City	04	Bay of Plenty Region	2.79133e+06	6.39071e+06	1	1196100	5	963	38	2
408700	198	515420	Grey Lynn East	701	Western Bays Ward	7	Auckland City	02	Auckland Region	2.6657e+06	6.48117e+06	1	408700	3	925	65	1
2899600	39	603000	High St-Stuart St	7103	Cargill Ward	71	Dunedin City	14	Otago Region	2.31601e+06	5.47827e+06	1	2899600	7	1022	14	2
2638500	294	590300	Middleton	6006	Spreydon-Heathcote Ward	60	Christchurch City	13	Canterbury Region	2.47816e+06	5.7401e+06	1	2638500	7	1003	103	2
672300	117	522400	Puhinui	802	Papatoetoe Ward	8	Manukau City	02	Auckland Region	2.67602e+06	6.46686e+06	1	672300	7	1005	41	2
670903	39	522302	Papatoetoe East	802	Papatoetoe Ward	8	Manukau City	02	Auckland Region	2.67782e+06	6.46735e+06	1	670903	10	1263	18	3
671200	81	522400	Puhinui	802	Papatoetoe Ward	8	Manukau City	02	Auckland Region	2.67734e+06	6.46726e+06	1	671200	8	1065	36	3
278103	309	512901	Parrs Park	602	Waitakere Ward	6	Waitakere City	02	Auckland Region	2.65533e+06	6.47628e+06	1	278103	9	1095	139	3
409200	21	515420	Grey Lynn East	701	Western Bays Ward	7	Auckland City	02	Auckland Region	2.66623e+06	6.48119e+06	1	409200	3	925	7	1
1589400	123	551900	Kawaroa	3301	New Plymouth City Ward	33	New Plymouth District	07	Taranaki Region	2.60225e+06	6.23743e+06	1	1589400	5	965	43	2
409600	84	515420	Grey Lynn East	701	Western Bays Ward	7	Auckland City	02	Auckland Region	2.66596e+06	6.48076e+06	1	409600	5	971	29	2
409800	66	515420	Grey Lynn East	701	Western Bays Ward	7	Auckland City	02	Auckland Region	2.66597e+06	6.48058e+06	1	409800	4	951	23	2
2507200	513	590502	Marshland	6001	Shirley-Papanui Ward	60	Christchurch City	13	Canterbury Region	2.48225e+06	5.74606e+06	1	2507200	3	934	169	1
1203207	42	536810	Mt Maunganui North	2301	Mount Maunganui-Papamoa Ward	23	Tauranga City	04	Bay of Plenty Region	2.79176e+06	6.38982e+06	1	1203207	9	1110	19	3
2899500	24	603000	High St-Stuart St	7103	Cargill Ward	71	Dunedin City	14	Otago Region	2.31579e+06	5.47814e+06	1	2899500	7	1022	8	2
543900	141	518101	Mt Eden North	703	Eden-Albert Ward	7	Auckland City	02	Auckland Region	2.66708e+06	6.4796e+06	1	543900	2	905	47	1
2510202	246	588101	Redwood North	6001	Shirley-Papanui Ward	60	Christchurch City	13	Canterbury Region	2.47997e+06	5.74825e+06	1	2510202	4	952	86	2
2509902	282	588101	Redwood North	6001	Shirley-Papanui Ward	60	Christchurch City	13	Canterbury Region	2.47952e+06	5.74822e+06	1	2509902	3	932	93	1
2509901	210	588101	Redwood North	6001	Shirley-Papanui Ward	60	Christchurch City	13	Canterbury Region	2.47915e+06	5.74826e+06	1	2509901	4	950	74	2
2903700	27	603100	Stuart St-Frederick St	7103	Cargill Ward	71	Dunedin City	14	Otago Region	2.31629e+06	5.47913e+06	1	2903700	9	1128	12	3
2771800	66	598202	Otipua Creek-Washdyke Flat	6404	Timaru Ward	64	Timaru District	13	Canterbury Region	2.36968e+06	5.6503e+06	1	2771800	4	945	23	2
543800	186	518101	Mt Eden North	703	Eden-Albert Ward	7	Auckland City	02	Auckland Region	2.66728e+06	6.47967e+06	1	543800	5	974	65	2
674700	72	524601	Manukau Central	802	Papatoetoe Ward	8	Manukau City	02	Auckland Region	2.67623e+06	6.46624e+06	1	674700	8	1033	32	3
412402	12	514200	Newton	704	Hobson Ward	7	Auckland City	02	Auckland Region	2.66728e+06	6.48061e+06	1	412402	6	984	4	2
544500	60	518101	Mt Eden North	703	Eden-Albert Ward	7	Auckland City	02	Auckland Region	2.66677e+06	6.47978e+06	1	544500	6	979	21	2
544302	24	518101	Mt Eden North	703	Eden-Albert Ward	7	Auckland City	02	Auckland Region	2.66677e+06	6.47985e+06	1	544302	4	948	8	2
412500	72	514200	Newton	704	Hobson Ward	7	Auckland City	02	Auckland Region	2.66729e+06	6.48069e+06	1	412500	6	984	25	2
281300	186	513013	McLaren Park	602	Waitakere Ward	6	Waitakere City	02	Auckland Region	2.65442e+06	6.47672e+06	1	281300	8	1061	84	3
410700	120	515420	Grey Lynn East	701	Western Bays Ward	7	Auckland City	02	Auckland Region	2.66618e+06	6.48065e+06	1	410700	1	895	40	1
1590400	111	552002	Marsland Hill	3301	New Plymouth City Ward	33	New Plymouth District	07	Taranaki Region	2.60298e+06	6.23759e+06	1	1590400	5	970	39	2
1591400	39	551800	New Plymouth Central	3301	New Plymouth City Ward	33	New Plymouth District	07	Taranaki Region	2.60238e+06	6.23771e+06	1	1591400	8	1041	18	3
1592100	6	551800	New Plymouth Central	3301	New Plymouth City Ward	33	New Plymouth District	07	Taranaki Region	2.60289e+06	6.2378e+06	1	1592100	6	999	2	2
1198000	75	536821	Omanu	2301	Mount Maunganui-Papamoa Ward	23	Tauranga City	04	Bay of Plenty Region	2.79284e+06	6.38927e+06	1	1198000	7	1011	26	2
1198300	99	536821	Omanu	2301	Mount Maunganui-Papamoa Ward	23	Tauranga City	04	Bay of Plenty Region	2.793e+06	6.38933e+06	1	1198300	7	1011	35	2
1197500	135	536821	Omanu	2301	Mount Maunganui-Papamoa Ward	23	Tauranga City	04	Bay of Plenty Region	2.7925e+06	6.38941e+06	1	1197500	3	922	45	1
1197400	117	536821	Omanu	2301	Mount Maunganui-Papamoa Ward	23	Tauranga City	04	Bay of Plenty Region	2.79238e+06	6.38937e+06	1	1197400	8	1036	53	3
1197900	69	536821	Omanu	2301	Mount Maunganui-Papamoa Ward	23	Tauranga City	04	Bay of Plenty Region	2.79274e+06	6.38922e+06	1	1197900	8	1046	31	3
2638800	198	594800	Barrington North	6006	Spreydon-Heathcote Ward	60	Christchurch City	13	Canterbury Region	2.47765e+06	5.7394e+06	1	2638800	6	998	69	2
541900	78	517702	Sandringham West	703	Eden-Albert Ward	7	Auckland City	02	Auckland Region	2.66442e+06	6.4778e+06	1	541900	7	1010	27	2
411700	27	514200	Newton	701	Western Bays Ward	7	Auckland City	02	Auckland Region	2.66676e+06	6.48091e+06	1	411700	6	990	9	2
410900	54	515420	Grey Lynn East	701	Western Bays Ward	7	Auckland City	02	Auckland Region	2.66615e+06	6.48108e+06	1	410900	3	929	18	1
2508900	135	588101	Redwood North	6001	Shirley-Papanui Ward	60	Christchurch City	13	Canterbury Region	2.47972e+06	5.74768e+06	1	2508900	6	977	47	2
2901600	45	603100	Stuart St-Frederick St	7103	Cargill Ward	71	Dunedin City	14	Otago Region	2.31652e+06	5.47859e+06	1	2901600	9	1128	20	3
541500	159	517702	Sandringham West	703	Eden-Albert Ward	7	Auckland City	02	Auckland Region	2.66485e+06	6.477e+06	1	541500	4	947	56	2
410500	114	515420	Grey Lynn East	701	Western Bays Ward	7	Auckland City	02	Auckland Region	2.66604e+06	6.48082e+06	1	410500	5	958	40	2
410600	108	515420	Grey Lynn East	701	Western Bays Ward	7	Auckland City	02	Auckland Region	2.66612e+06	6.48088e+06	1	410600	3	934	36	1
1590500	90	551800	New Plymouth Central	3301	New Plymouth City Ward	33	New Plymouth District	07	Taranaki Region	2.60229e+06	6.23814e+06	1	1590500	6	991	31	2
2508702	21	588102	Redwood South	6001	Shirley-Papanui Ward	60	Christchurch City	13	Canterbury Region	2.4791e+06	5.74582e+06	1	2508702	2	901	7	1
1197800	129	536821	Omanu	2301	Mount Maunganui-Papamoa Ward	23	Tauranga City	04	Bay of Plenty Region	2.79262e+06	6.38913e+06	1	1197800	8	1046	58	3
1198200	228	536821	Omanu	2301	Mount Maunganui-Papamoa Ward	23	Tauranga City	04	Bay of Plenty Region	2.79307e+06	6.38912e+06	1	1198200	5	969	80	2
2508200	27	588102	Redwood South	6001	Shirley-Papanui Ward	60	Christchurch City	13	Canterbury Region	2.479e+06	5.74701e+06	1	2508200	9	1126	12	3
2508301	162	588102	Redwood South	6001	Shirley-Papanui Ward	60	Christchurch City	13	Canterbury Region	2.47972e+06	5.74695e+06	1	2508301	2	900	53	1
2508600	177	588102	Redwood South	6001	Shirley-Papanui Ward	60	Christchurch City	13	Canterbury Region	2.47949e+06	5.74644e+06	1	2508600	6	985	62	2
2638900	165	594800	Barrington North	6006	Spreydon-Heathcote Ward	60	Christchurch City	13	Canterbury Region	2.4778e+06	5.73937e+06	1	2638900	8	1053	74	3
410800	132	515420	Grey Lynn East	701	Western Bays Ward	7	Auckland City	02	Auckland Region	2.66624e+06	6.48073e+06	1	410800	2	914	44	1
2509100	189	588102	Redwood South	6001	Shirley-Papanui Ward	60	Christchurch City	13	Canterbury Region	2.47967e+06	5.74744e+06	1	2509100	3	932	62	1
2509001	180	588102	Redwood South	6001	Shirley-Papanui Ward	60	Christchurch City	13	Canterbury Region	2.47924e+06	5.74754e+06	1	2509001	6	995	63	2
411900	57	514200	Newton	701	Western Bays Ward	7	Auckland City	02	Auckland Region	2.66686e+06	6.481e+06	1	411900	6	990	20	2
2769900	12	598312	Orari	6403	Temuka Ward	64	Timaru District	13	Canterbury Region	2.37238e+06	5.66855e+06	1	2769900	2	900	4	1
674100	126	524601	Manukau Central	802	Papatoetoe Ward	8	Manukau City	02	Auckland Region	2.67591e+06	6.46601e+06	1	674100	10	1203	57	3
411500	45	515420	Grey Lynn East	701	Western Bays Ward	7	Auckland City	02	Auckland Region	2.66648e+06	6.48091e+06	1	411500	3	922	15	1
1590800	75	551800	New Plymouth Central	3301	New Plymouth City Ward	33	New Plymouth District	07	Taranaki Region	2.60251e+06	6.23808e+06	1	1590800	9	1077	34	3
2901100	3	603100	Stuart St-Frederick St	7103	Cargill Ward	71	Dunedin City	14	Otago Region	2.31634e+06	5.47884e+06	1	2901100	9	1128	1	3
2507607	93	588102	Redwood South	6001	Shirley-Papanui Ward	60	Christchurch City	13	Canterbury Region	2.47997e+06	5.74783e+06	1	2507607	2	901	31	1
2901400	6	603100	Stuart St-Frederick St	7103	Cargill Ward	71	Dunedin City	14	Otago Region	2.31649e+06	5.47888e+06	1	2901400	9	1128	3	3
542700	519	518101	Mt Eden North	703	Eden-Albert Ward	7	Auckland City	02	Auckland Region	2.66768e+06	6.48e+06	1	542700	7	1020	182	2
542300	195	517702	Sandringham West	703	Eden-Albert Ward	7	Auckland City	02	Auckland Region	2.66435e+06	6.47733e+06	1	542300	8	1036	88	3
411200	114	515420	Grey Lynn East	701	Western Bays Ward	7	Auckland City	02	Auckland Region	2.6662e+06	6.48094e+06	1	411200	2	915	38	1
2122000	18	572900	Thorndon-Tinakori Road	4703	Lambton Ward	47	Wellington City	09	Wellington Region	2.65847e+06	5.99037e+06	1	2122000	4	947	6	2
1591100	6	551800	New Plymouth Central	3301	New Plymouth City Ward	33	New Plymouth District	07	Taranaki Region	2.60245e+06	6.23791e+06	1	1591100	8	1041	3	3
2508802	24	591900	Papanui	6001	Shirley-Papanui Ward	60	Christchurch City	13	Canterbury Region	2.47929e+06	5.74536e+06	1	2508802	2	901	8	1
1196800	135	536810	Mt Maunganui North	2301	Mount Maunganui-Papamoa Ward	23	Tauranga City	04	Bay of Plenty Region	2.79191e+06	6.38983e+06	1	1196800	6	976	47	2
1197200	219	536821	Omanu	2301	Mount Maunganui-Papamoa Ward	23	Tauranga City	04	Bay of Plenty Region	2.79235e+06	6.38972e+06	1	1197200	4	943	77	2
2507507	18	588102	Redwood South	6001	Shirley-Papanui Ward	60	Christchurch City	13	Canterbury Region	2.4798e+06	5.74663e+06	1	2507507	4	946	6	2
2508500	234	588102	Redwood South	6001	Shirley-Papanui Ward	60	Christchurch City	13	Canterbury Region	2.47932e+06	5.7467e+06	1	2508500	3	924	77	1
2508302	276	588102	Redwood South	6001	Shirley-Papanui Ward	60	Christchurch City	13	Canterbury Region	2.47961e+06	5.74668e+06	1	2508302	3	927	91	1
2507608	90	588102	Redwood South	6001	Shirley-Papanui Ward	60	Christchurch City	13	Canterbury Region	2.47994e+06	5.7466e+06	1	2507608	2	914	30	1
2639000	186	594800	Barrington North	6006	Spreydon-Heathcote Ward	60	Christchurch City	13	Canterbury Region	2.47745e+06	5.73922e+06	1	2639000	9	1105	84	3
2507606	57	588102	Redwood South	6001	Shirley-Papanui Ward	60	Christchurch City	13	Canterbury Region	2.47992e+06	5.74715e+06	1	2507606	7	1027	20	2
2508000	189	588102	Redwood South	6001	Shirley-Papanui Ward	60	Christchurch City	13	Canterbury Region	2.4792e+06	5.74728e+06	1	2508000	9	1073	85	3
2901800	138	603100	Stuart St-Frederick St	7103	Cargill Ward	71	Dunedin City	14	Otago Region	2.31668e+06	5.47877e+06	1	2901800	10	1159	62	3
542502	270	518101	Mt Eden North	703	Eden-Albert Ward	7	Auckland City	02	Auckland Region	2.66717e+06	6.47992e+06	1	542502	5	971	94	2
542600	135	518101	Mt Eden North	703	Eden-Albert Ward	7	Auckland City	02	Auckland Region	2.66753e+06	6.48003e+06	1	542600	4	950	47	2
542800	285	518101	Mt Eden North	703	Eden-Albert Ward	7	Auckland City	02	Auckland Region	2.6674e+06	6.47985e+06	1	542800	6	981	100	2
1590900	63	551800	New Plymouth Central	3301	New Plymouth City Ward	33	New Plymouth District	07	Taranaki Region	2.60224e+06	6.23783e+06	1	1590900	8	1041	28	3
1591500	3	551800	New Plymouth Central	3301	New Plymouth City Ward	33	New Plymouth District	07	Taranaki Region	2.60266e+06	6.23783e+06	1	1591500	6	999	1	2
2508801	384	588102	Redwood South	6001	Shirley-Papanui Ward	60	Christchurch City	13	Canterbury Region	2.47905e+06	5.74564e+06	1	2508801	2	901	127	1
411600	12	515420	Grey Lynn East	701	Western Bays Ward	7	Auckland City	02	Auckland Region	2.66657e+06	6.48096e+06	1	411600	3	922	4	1
1197000	174	536821	Omanu	2301	Mount Maunganui-Papamoa Ward	23	Tauranga City	04	Bay of Plenty Region	2.79212e+06	6.38959e+06	1	1197000	4	940	61	2
1197700	252	536821	Omanu	2301	Mount Maunganui-Papamoa Ward	23	Tauranga City	04	Bay of Plenty Region	2.79278e+06	6.38951e+06	1	1197700	5	960	88	2
1197600	111	536821	Omanu	2301	Mount Maunganui-Papamoa Ward	23	Tauranga City	04	Bay of Plenty Region	2.79262e+06	6.38946e+06	1	1197600	3	932	37	1
2508104	153	588102	Redwood South	6001	Shirley-Papanui Ward	60	Christchurch City	13	Canterbury Region	2.4796e+06	5.74717e+06	1	2508104	1	892	50	1
2508103	90	588102	Redwood South	6001	Shirley-Papanui Ward	60	Christchurch City	13	Canterbury Region	2.47917e+06	5.74718e+06	1	2508103	9	1126	40	3
2507502	30	588102	Redwood South	6001	Shirley-Papanui Ward	60	Christchurch City	13	Canterbury Region	2.47988e+06	5.74777e+06	1	2507502	4	946	10	2
2508101	90	588102	Redwood South	6001	Shirley-Papanui Ward	60	Christchurch City	13	Canterbury Region	2.47964e+06	5.74728e+06	1	2508101	1	886	30	1
2901200	51	603100	Stuart St-Frederick St	7103	Cargill Ward	71	Dunedin City	14	Otago Region	2.31645e+06	5.47907e+06	1	2901200	9	1128	23	3
2901300	546	603100	Stuart St-Frederick St	7103	Cargill Ward	71	Dunedin City	14	Otago Region	2.31656e+06	5.47905e+06	1	2901300	9	1128	246	3
542100	159	517702	Sandringham West	703	Eden-Albert Ward	7	Auckland City	02	Auckland Region	2.66449e+06	6.47751e+06	1	542100	8	1031	72	3
543100	96	518101	Mt Eden North	703	Eden-Albert Ward	7	Auckland City	02	Auckland Region	2.6674e+06	6.47959e+06	1	543100	3	934	32	1
674000	84	524601	Manukau Central	802	Papatoetoe Ward	8	Manukau City	02	Auckland Region	2.67617e+06	6.46618e+06	1	674000	8	1057	38	3
673800	120	524601	Manukau Central	802	Papatoetoe Ward	8	Manukau City	02	Auckland Region	2.67592e+06	6.46617e+06	1	673800	8	1041	54	3
541600	63	517702	Sandringham West	703	Eden-Albert Ward	7	Auckland City	02	Auckland Region	2.66508e+06	6.47736e+06	1	541600	8	1057	28	3
542000	264	517702	Sandringham West	703	Eden-Albert Ward	7	Auckland City	02	Auckland Region	2.66464e+06	6.47771e+06	1	542000	7	999	92	2
2507803	6	590502	Marshland	6001	Shirley-Papanui Ward	60	Christchurch City	13	Canterbury Region	2.47994e+06	5.74554e+06	1	2507803	4	946	2	2
2507605	120	588102	Redwood South	6001	Shirley-Papanui Ward	60	Christchurch City	13	Canterbury Region	2.47995e+06	5.74759e+06	1	2507605	7	1027	42	2
2507503	57	588102	Redwood South	6001	Shirley-Papanui Ward	60	Christchurch City	13	Canterbury Region	2.47984e+06	5.74746e+06	1	2507503	7	1008	20	2
2638701	210	594800	Barrington North	6006	Spreydon-Heathcote Ward	60	Christchurch City	13	Canterbury Region	2.47794e+06	5.73962e+06	1	2638701	7	1010	74	2
2507501	45	588102	Redwood South	6001	Shirley-Papanui Ward	60	Christchurch City	13	Canterbury Region	2.47989e+06	5.74796e+06	1	2507501	7	1008	16	2
2902100	141	603100	Stuart St-Frederick St	7103	Cargill Ward	71	Dunedin City	14	Otago Region	2.31669e+06	5.479e+06	1	2902100	9	1089	63	3
2902200	126	603100	Stuart St-Frederick St	7103	Cargill Ward	71	Dunedin City	14	Otago Region	2.31663e+06	5.47902e+06	1	2902200	9	1102	57	3
2515204	75	588401	Belfast South	6001	Shirley-Papanui Ward	60	Christchurch City	13	Canterbury Region	2.47937e+06	5.74999e+06	1	2515204	3	928	25	1
2902000	78	603100	Stuart St-Frederick St	7103	Cargill Ward	71	Dunedin City	14	Otago Region	2.31677e+06	5.479e+06	1	2902000	9	1109	35	3
673900	108	524601	Manukau Central	802	Papatoetoe Ward	8	Manukau City	02	Auckland Region	2.67606e+06	6.46607e+06	1	673900	8	1057	49	3
280905	357	513012	Palm Heights	602	Waitakere Ward	6	Waitakere City	02	Auckland Region	2.6541e+06	6.47716e+06	1	280905	10	1147	161	3
411000	15	515420	Grey Lynn East	701	Western Bays Ward	7	Auckland City	02	Auckland Region	2.66641e+06	6.48111e+06	1	411000	2	915	5	1
411800	87	514200	Newton	701	Western Bays Ward	7	Auckland City	02	Auckland Region	2.6668e+06	6.48082e+06	1	411800	7	1007	30	2
1590300	87	552002	Marsland Hill	3301	New Plymouth City Ward	33	New Plymouth District	07	Taranaki Region	2.60272e+06	6.23764e+06	1	1590300	8	1035	39	3
1591700	18	551800	New Plymouth Central	3301	New Plymouth City Ward	33	New Plymouth District	07	Taranaki Region	2.6027e+06	6.23807e+06	1	1591700	6	999	6	2
1198500	192	536821	Omanu	2301	Mount Maunganui-Papamoa Ward	23	Tauranga City	04	Bay of Plenty Region	2.7929e+06	6.38889e+06	1	1198500	5	964	67	2
1198100	168	536821	Omanu	2301	Mount Maunganui-Papamoa Ward	23	Tauranga City	04	Bay of Plenty Region	2.79297e+06	6.38899e+06	1	1198100	2	901	55	1
1198400	141	536821	Omanu	2301	Mount Maunganui-Papamoa Ward	23	Tauranga City	04	Bay of Plenty Region	2.79281e+06	6.38878e+06	1	1198400	9	1112	63	3
2507900	117	590502	Marshland	6001	Shirley-Papanui Ward	60	Christchurch City	13	Canterbury Region	2.48121e+06	5.74615e+06	1	2507900	2	903	39	1
2507801	33	590502	Marshland	6001	Shirley-Papanui Ward	60	Christchurch City	13	Canterbury Region	2.48033e+06	5.74618e+06	1	2507801	4	946	12	2
2507609	132	588102	Redwood South	6001	Shirley-Papanui Ward	60	Christchurch City	13	Canterbury Region	2.47991e+06	5.74697e+06	1	2507609	2	914	44	1
2507506	39	588102	Redwood South	6001	Shirley-Papanui Ward	60	Christchurch City	13	Canterbury Region	2.47982e+06	5.74693e+06	1	2507506	4	946	14	2
2509002	60	588102	Redwood South	6001	Shirley-Papanui Ward	60	Christchurch City	13	Canterbury Region	2.47934e+06	5.74748e+06	1	2509002	1	886	20	1
542501	9	518101	Mt Eden North	704	Hobson Ward	7	Auckland City	02	Auckland Region	2.66741e+06	6.48011e+06	1	542501	5	971	3	2
673401	48	524601	Manukau Central	802	Papatoetoe Ward	8	Manukau City	02	Auckland Region	2.67611e+06	6.46652e+06	1	673401	8	1057	22	3
673402	102	524601	Manukau Central	802	Papatoetoe Ward	8	Manukau City	02	Auckland Region	2.67606e+06	6.46646e+06	1	673402	8	1057	46	3
412100	36	514200	Newton	704	Hobson Ward	7	Auckland City	02	Auckland Region	2.66719e+06	6.48111e+06	1	412100	6	990	13	2
542900	300	518101	Mt Eden North	703	Eden-Albert Ward	7	Auckland City	02	Auckland Region	2.66754e+06	6.47971e+06	1	542900	7	1020	105	2
410400	78	515420	Grey Lynn East	701	Western Bays Ward	7	Auckland City	02	Auckland Region	2.66602e+06	6.48103e+06	1	410400	3	929	26	1
1590200	78	552002	Marsland Hill	3301	New Plymouth City Ward	33	New Plymouth District	07	Taranaki Region	2.60276e+06	6.23754e+06	1	1590200	7	1006	27	2
1591200	3	551800	New Plymouth Central	3301	New Plymouth City Ward	33	New Plymouth District	07	Taranaki Region	2.60256e+06	6.23799e+06	1	1591200	8	1041	1	3
1590700	48	551800	New Plymouth Central	3301	New Plymouth City Ward	33	New Plymouth District	07	Taranaki Region	2.60234e+06	6.23802e+06	1	1590700	6	999	17	2
412000	72	514200	Newton	704	Hobson Ward	7	Auckland City	02	Auckland Region	2.6671e+06	6.48108e+06	1	412000	7	1007	25	2
1196900	144	536810	Mt Maunganui North	2301	Mount Maunganui-Papamoa Ward	23	Tauranga City	04	Bay of Plenty Region	2.79203e+06	6.38986e+06	1	1196900	6	992	50	2
1197300	213	536821	Omanu	2301	Mount Maunganui-Papamoa Ward	23	Tauranga City	04	Bay of Plenty Region	2.79253e+06	6.3898e+06	1	1197300	4	947	75	2
2508400	102	588102	Redwood South	6001	Shirley-Papanui Ward	60	Christchurch City	13	Canterbury Region	2.47905e+06	5.74675e+06	1	2508400	5	958	36	2
2638600	186	594800	Barrington North	6006	Spreydon-Heathcote Ward	60	Christchurch City	13	Canterbury Region	2.47821e+06	5.73977e+06	1	2638600	5	963	65	2
2638702	111	594800	Barrington North	6006	Spreydon-Heathcote Ward	60	Christchurch City	13	Canterbury Region	2.47806e+06	5.73959e+06	1	2638702	6	994	39	2
2639700	129	594800	Barrington North	6006	Spreydon-Heathcote Ward	60	Christchurch City	13	Canterbury Region	2.47839e+06	5.73956e+06	1	2639700	5	962	45	2
2509202	114	588102	Redwood South	6001	Shirley-Papanui Ward	60	Christchurch City	13	Canterbury Region	2.47921e+06	5.74739e+06	1	2509202	4	936	40	2
2509201	75	588102	Redwood South	6001	Shirley-Papanui Ward	60	Christchurch City	13	Canterbury Region	2.47935e+06	5.74741e+06	1	2509201	5	968	26	2
411100	36	515420	Grey Lynn East	701	Western Bays Ward	7	Auckland City	02	Auckland Region	2.66628e+06	6.481e+06	1	411100	2	915	12	1
1466708	234	548833	Te Mata Hills	3008	Havelock North Ward	30	Hastings District	06	Hawke's Bay Region	2.84479e+06	6.16309e+06	1	1466708	1	884	77	1
543000	48	518101	Mt Eden North	703	Eden-Albert Ward	7	Auckland City	02	Auckland Region	2.66784e+06	6.47972e+06	1	543000	7	1020	17	2
541800	144	517702	Sandringham West	703	Eden-Albert Ward	7	Auckland City	02	Auckland Region	2.66466e+06	6.47787e+06	1	541800	7	1010	50	2
542200	159	517702	Sandringham West	703	Eden-Albert Ward	7	Auckland City	02	Auckland Region	2.66457e+06	6.47741e+06	1	542200	3	922	52	1
1590000	66	551900	Kawaroa	3301	New Plymouth City Ward	33	New Plymouth District	07	Taranaki Region	2.60248e+06	6.23738e+06	1	1590000	7	1008	23	2
411300	75	515420	Grey Lynn East	701	Western Bays Ward	7	Auckland City	02	Auckland Region	2.66632e+06	6.48078e+06	1	411300	3	922	25	1
411400	12	515420	Grey Lynn East	701	Western Bays Ward	7	Auckland City	02	Auckland Region	2.6664e+06	6.48085e+06	1	411400	3	922	4	1
2121900	69	572900	Thorndon-Tinakori Road	4703	Lambton Ward	47	Wellington City	09	Wellington Region	2.6584e+06	5.99032e+06	1	2121900	6	985	24	2
1591000	33	551800	New Plymouth Central	3301	New Plymouth City Ward	33	New Plymouth District	07	Taranaki Region	2.60235e+06	6.23788e+06	1	1591000	8	1041	15	3
2508701	87	588102	Redwood South	6001	Shirley-Papanui Ward	60	Christchurch City	13	Canterbury Region	2.47928e+06	5.74627e+06	1	2508701	6	985	30	2
1197100	162	536821	Omanu	2301	Mount Maunganui-Papamoa Ward	23	Tauranga City	04	Bay of Plenty Region	2.79224e+06	6.38963e+06	1	1197100	3	923	53	1
2642300	198	594800	Barrington North	6006	Spreydon-Heathcote Ward	60	Christchurch City	13	Canterbury Region	2.47838e+06	5.74001e+06	1	2642300	6	980	69	2
546200	3	518101	Mt Eden North	703	Eden-Albert Ward	7	Auckland City	02	Auckland Region	2.66771e+06	6.47948e+06	1	546200	5	956	1	2
2642200	63	594800	Barrington North	6006	Spreydon-Heathcote Ward	60	Christchurch City	13	Canterbury Region	2.47877e+06	5.73823e+06	1	2642200	4	948	22	2
2118700	30	572900	Thorndon-Tinakori Road	4703	Lambton Ward	47	Wellington City	09	Wellington Region	2.65911e+06	5.99108e+06	1	2118700	3	931	10	1
1594100	6	551800	New Plymouth Central	3301	New Plymouth City Ward	33	New Plymouth District	07	Taranaki Region	2.60395e+06	6.2383e+06	1	1594100	7	1013	2	2
2641701	165	594800	Barrington North	6006	Spreydon-Heathcote Ward	60	Christchurch City	13	Canterbury Region	2.4787e+06	5.73842e+06	1	2641701	9	1114	74	3
2641900	165	594800	Barrington North	6006	Spreydon-Heathcote Ward	60	Christchurch City	13	Canterbury Region	2.47888e+06	5.73851e+06	1	2641900	6	977	58	2
2118400	39	572900	Thorndon-Tinakori Road	4703	Lambton Ward	47	Wellington City	09	Wellington Region	2.65934e+06	5.99118e+06	1	2118400	3	922	13	1
281403	111	513013	McLaren Park	602	Waitakere Ward	6	Waitakere City	02	Auckland Region	2.65448e+06	6.47695e+06	1	281403	8	1063	50	3
2511501	120	588300	Casebrook	6001	Shirley-Papanui Ward	60	Christchurch City	13	Canterbury Region	2.47743e+06	5.74714e+06	1	2511501	3	931	40	1
2643500	99	595000	Spreydon	6006	Spreydon-Heathcote Ward	60	Christchurch City	13	Canterbury Region	2.47934e+06	5.73981e+06	1	2643500	7	1004	35	2
2903200	21	603100	Stuart St-Frederick St	7103	Cargill Ward	71	Dunedin City	14	Otago Region	2.31615e+06	5.47859e+06	1	2903200	8	1032	9	3
674500	27	524601	Manukau Central	802	Papatoetoe Ward	8	Manukau City	02	Auckland Region	2.67642e+06	6.46645e+06	1	674500	8	1033	12	3
412200	261	514200	Newton	704	Hobson Ward	7	Auckland City	02	Auckland Region	2.66736e+06	6.48107e+06	1	412200	6	995	91	2
281509	279	513013	McLaren Park	602	Waitakere Ward	6	Waitakere City	02	Auckland Region	2.65484e+06	6.47674e+06	1	281509	9	1113	126	3
1198900	189	536821	Omanu	2301	Mount Maunganui-Papamoa Ward	23	Tauranga City	04	Bay of Plenty Region	2.79357e+06	6.38885e+06	1	1198900	4	941	66	2
2510500	72	588300	Casebrook	6001	Shirley-Papanui Ward	60	Christchurch City	13	Canterbury Region	2.47772e+06	5.74643e+06	1	2510500	9	1129	32	3
2902900	24	603100	Stuart St-Frederick St	7103	Cargill Ward	71	Dunedin City	14	Otago Region	2.31624e+06	5.47892e+06	1	2902900	9	1128	11	3
544600	126	518101	Mt Eden North	703	Eden-Albert Ward	7	Auckland City	02	Auckland Region	2.66697e+06	6.47978e+06	1	544600	6	982	44	2
412302	162	514200	Newton	704	Hobson Ward	7	Auckland City	02	Auckland Region	2.6674e+06	6.48065e+06	1	412302	7	1005	57	2
413400	78	514000	Freemans Bay	701	Western Bays Ward	7	Auckland City	02	Auckland Region	2.66687e+06	6.48136e+06	1	413400	4	951	27	2
674600	60	524601	Manukau Central	802	Papatoetoe Ward	8	Manukau City	02	Auckland Region	2.67629e+06	6.46646e+06	1	674600	9	1097	27	3
281506	279	513013	McLaren Park	602	Waitakere Ward	6	Waitakere City	02	Auckland Region	2.6548e+06	6.47651e+06	1	281506	9	1083	126	3
544000	162	518101	Mt Eden North	703	Eden-Albert Ward	7	Auckland City	02	Auckland Region	2.66702e+06	6.47951e+06	1	544000	5	970	57	2
1592400	36	551800	New Plymouth Central	3301	New Plymouth City Ward	33	New Plymouth District	07	Taranaki Region	2.60296e+06	6.23804e+06	1	1592400	6	999	13	2
151201	36	507400	Mairangi Bay	501	Northern Ward	5	North Shore City	02	Auckland Region	2.66587e+06	6.49363e+06	1	151201	1	880	12	1
544400	39	518101	Mt Eden North	703	Eden-Albert Ward	7	Auckland City	02	Auckland Region	2.66693e+06	6.47986e+06	1	544400	6	979	14	2
2510000	471	588101	Redwood North	6001	Shirley-Papanui Ward	60	Christchurch City	13	Canterbury Region	2.47966e+06	5.74891e+06	1	2510000	1	898	155	1
2509304	54	588101	Redwood North	6001	Shirley-Papanui Ward	60	Christchurch City	13	Canterbury Region	2.47916e+06	5.74787e+06	1	2509304	7	1003	19	2
675000	21	524601	Manukau Central	802	Papatoetoe Ward	8	Manukau City	02	Auckland Region	2.67597e+06	6.46572e+06	1	675000	9	1097	9	3
413600	63	514000	Freemans Bay	701	Western Bays Ward	7	Auckland City	02	Auckland Region	2.66661e+06	6.48155e+06	1	413600	7	1011	22	2
543200	150	518101	Mt Eden North	703	Eden-Albert Ward	7	Auckland City	02	Auckland Region	2.66738e+06	6.47943e+06	1	543200	8	1044	68	3
1591900	15	551800	New Plymouth Central	3301	New Plymouth City Ward	33	New Plymouth District	07	Taranaki Region	2.60281e+06	6.23797e+06	1	1591900	6	999	5	2
1593000	60	551800	New Plymouth Central	3301	New Plymouth City Ward	33	New Plymouth District	07	Taranaki Region	2.60353e+06	6.23848e+06	1	1593000	6	981	21	2
1199100	132	536821	Omanu	2301	Mount Maunganui-Papamoa Ward	23	Tauranga City	04	Bay of Plenty Region	2.79347e+06	6.38851e+06	1	1199100	6	979	46	2
1199000	183	536821	Omanu	2301	Mount Maunganui-Papamoa Ward	23	Tauranga City	04	Bay of Plenty Region	2.7936e+06	6.38862e+06	1	1199000	4	952	64	2
2641300	180	594800	Barrington North	6006	Spreydon-Heathcote Ward	60	Christchurch City	13	Canterbury Region	2.47903e+06	5.73892e+06	1	2641300	8	1036	81	3
2510400	138	588300	Casebrook	6001	Shirley-Papanui Ward	60	Christchurch City	13	Canterbury Region	2.47775e+06	5.74661e+06	1	2510400	9	1129	62	3
413500	30	514000	Freemans Bay	701	Western Bays Ward	7	Auckland City	02	Auckland Region	2.66661e+06	6.48116e+06	1	413500	2	914	10	1
2509804	234	588101	Redwood North	6001	Shirley-Papanui Ward	60	Christchurch City	13	Canterbury Region	2.47978e+06	5.74836e+06	1	2509804	5	972	82	2
2903100	15	603100	Stuart St-Frederick St	7103	Cargill Ward	71	Dunedin City	14	Otago Region	2.3161e+06	5.4788e+06	1	2903100	8	1032	7	3
2509803	252	588101	Redwood North	6001	Shirley-Papanui Ward	60	Christchurch City	13	Canterbury Region	2.47967e+06	5.74845e+06	1	2509803	6	980	88	2
2509806	168	588101	Redwood North	6001	Shirley-Papanui Ward	60	Christchurch City	13	Canterbury Region	2.47928e+06	5.74855e+06	1	2509806	3	930	55	1
2509807	99	588101	Redwood North	6001	Shirley-Papanui Ward	60	Christchurch City	13	Canterbury Region	2.47947e+06	5.74853e+06	1	2509807	3	930	33	1
2509805	108	588101	Redwood North	6001	Shirley-Papanui Ward	60	Christchurch City	13	Canterbury Region	2.47922e+06	5.74861e+06	1	2509805	4	937	38	2
2510102	108	588101	Redwood North	6001	Shirley-Papanui Ward	60	Christchurch City	13	Canterbury Region	2.47972e+06	5.74868e+06	1	2510102	2	904	36	1
151000	144	507400	Mairangi Bay	501	Northern Ward	5	North Shore City	02	Auckland Region	2.66584e+06	6.49376e+06	1	151000	4	952	50	2
281200	84	513020	Opanuku	602	Waitakere Ward	6	Waitakere City	02	Auckland Region	2.65442e+06	6.4764e+06	1	281200	5	968	29	2
412301	153	514200	Newton	704	Hobson Ward	7	Auckland City	02	Auckland Region	2.66744e+06	6.48102e+06	1	412301	7	1016	54	2
2641702	39	594800	Barrington North	6006	Spreydon-Heathcote Ward	60	Christchurch City	13	Canterbury Region	2.47867e+06	5.73833e+06	1	2641702	9	1114	18	3
1593300	3	551800	New Plymouth Central	3301	New Plymouth City Ward	33	New Plymouth District	07	Taranaki Region	2.60367e+06	6.23842e+06	1	1593300	6	981	1	2
2641600	105	594800	Barrington North	6006	Spreydon-Heathcote Ward	60	Christchurch City	13	Canterbury Region	2.47877e+06	5.7386e+06	1	2641600	10	1142	47	3
413100	69	514000	Freemans Bay	701	Western Bays Ward	7	Auckland City	02	Auckland Region	2.66688e+06	6.48165e+06	1	413100	9	1122	31	3
2117100	45	572900	Thorndon-Tinakori Road	4703	Lambton Ward	47	Wellington City	09	Wellington Region	2.65941e+06	5.99202e+06	1	2117100	3	927	15	1
2510700	117	588300	Casebrook	6001	Shirley-Papanui Ward	60	Christchurch City	13	Canterbury Region	2.47757e+06	5.7466e+06	1	2510700	10	1249	53	3
2509600	156	588101	Redwood North	6001	Shirley-Papanui Ward	60	Christchurch City	13	Canterbury Region	2.47926e+06	5.7477e+06	1	2509600	5	960	55	2
2509500	57	588101	Redwood North	6001	Shirley-Papanui Ward	60	Christchurch City	13	Canterbury Region	2.47907e+06	5.74772e+06	1	2509500	5	968	20	2
2509700	141	588101	Redwood North	6001	Shirley-Papanui Ward	60	Christchurch City	13	Canterbury Region	2.47949e+06	5.74766e+06	1	2509700	9	1132	63	3
413300	222	514000	Freemans Bay	701	Western Bays Ward	7	Auckland City	02	Auckland Region	2.66688e+06	6.4815e+06	1	413300	9	1122	100	3
281502	216	513013	McLaren Park	602	Waitakere Ward	6	Waitakere City	02	Auckland Region	2.65461e+06	6.47688e+06	1	281502	9	1099	97	3
2509401	114	588101	Redwood North	6001	Shirley-Papanui Ward	60	Christchurch City	13	Canterbury Region	2.47962e+06	5.74798e+06	1	2509401	4	951	40	2
2509302	288	588101	Redwood North	6001	Shirley-Papanui Ward	60	Christchurch City	13	Canterbury Region	2.47937e+06	5.74795e+06	1	2509302	7	1020	101	2
544200	12	518101	Mt Eden North	703	Eden-Albert Ward	7	Auckland City	02	Auckland Region	2.66658e+06	6.47981e+06	1	544200	4	948	4	2
281402	153	513013	McLaren Park	602	Waitakere Ward	6	Waitakere City	02	Auckland Region	2.65432e+06	6.47703e+06	1	281402	6	975	54	2
674400	24	524601	Manukau Central	802	Papatoetoe Ward	8	Manukau City	02	Auckland Region	2.67634e+06	6.46671e+06	1	674400	8	1033	11	3
413000	363	514000	Freemans Bay	701	Western Bays Ward	7	Auckland City	02	Auckland Region	2.66673e+06	6.48163e+06	1	413000	8	1043	163	3
543400	276	518102	Sherbourne	703	Eden-Albert Ward	7	Auckland City	02	Auckland Region	2.66735e+06	6.47929e+06	1	543400	6	992	97	2
2122300	27	572900	Thorndon-Tinakori Road	4703	Lambton Ward	47	Wellington City	09	Wellington Region	2.65844e+06	5.99068e+06	1	2122300	4	947	9	2
1592500	3	551800	New Plymouth Central	3301	New Plymouth City Ward	33	New Plymouth District	07	Taranaki Region	2.60309e+06	6.23808e+06	1	1592500	6	999	1	2
2641800	84	594800	Barrington North	6006	Spreydon-Heathcote Ward	60	Christchurch City	13	Canterbury Region	2.47912e+06	5.73874e+06	1	2641800	4	948	29	2
1198800	189	536821	Omanu	2301	Mount Maunganui-Papamoa Ward	23	Tauranga City	04	Bay of Plenty Region	2.79333e+06	6.38887e+06	1	1198800	2	915	62	1
412800	57	514200	Newton	704	Hobson Ward	7	Auckland City	02	Auckland Region	2.66705e+06	6.48067e+06	1	412800	7	1007	20	2
151202	114	507400	Mairangi Bay	501	Northern Ward	5	North Shore City	02	Auckland Region	2.66602e+06	6.49374e+06	1	151202	1	880	38	1
543600	51	518101	Mt Eden North	703	Eden-Albert Ward	7	Auckland City	02	Auckland Region	2.66717e+06	6.47978e+06	1	543600	2	915	17	1
674900	36	524601	Manukau Central	802	Papatoetoe Ward	8	Manukau City	02	Auckland Region	2.67593e+06	6.46585e+06	1	674900	9	1097	16	3
412401	123	514200	Newton	704	Hobson Ward	7	Auckland City	02	Auckland Region	2.66733e+06	6.48067e+06	1	412401	3	921	41	1
412700	27	514200	Newton	704	Hobson Ward	7	Auckland City	02	Auckland Region	2.66716e+06	6.48062e+06	1	412700	6	984	9	2
151500	174	507400	Mairangi Bay	501	Northern Ward	5	North Shore City	02	Auckland Region	2.66607e+06	6.4936e+06	1	151500	2	909	57	1
544100	120	518101	Mt Eden North	703	Eden-Albert Ward	7	Auckland City	02	Auckland Region	2.66726e+06	6.47951e+06	1	544100	6	998	42	2
151103	69	508805	Windsor Park	501	Northern Ward	5	North Shore City	02	Auckland Region	2.66575e+06	6.49384e+06	1	151103	5	958	24	2
1592700	3	551800	New Plymouth Central	3301	New Plymouth City Ward	33	New Plymouth District	07	Taranaki Region	2.60313e+06	6.23801e+06	1	1592700	6	999	1	2
543700	180	518101	Mt Eden North	703	Eden-Albert Ward	7	Auckland City	02	Auckland Region	2.66712e+06	6.47969e+06	1	543700	5	962	63	2
1198700	153	536821	Omanu	2301	Mount Maunganui-Papamoa Ward	23	Tauranga City	04	Bay of Plenty Region	2.79325e+06	6.38873e+06	1	1198700	4	944	54	2
1198601	150	536821	Omanu	2301	Mount Maunganui-Papamoa Ward	23	Tauranga City	04	Bay of Plenty Region	2.79315e+06	6.38844e+06	1	1198601	6	985	52	2
2510800	87	588300	Casebrook	6001	Shirley-Papanui Ward	60	Christchurch City	13	Canterbury Region	2.47736e+06	5.74638e+06	1	2510800	10	1249	39	3
544700	36	518101	Mt Eden North	703	Eden-Albert Ward	7	Auckland City	02	Auckland Region	2.66657e+06	6.4797e+06	1	544700	3	934	12	1
543500	102	518101	Mt Eden North	703	Eden-Albert Ward	7	Auckland City	02	Auckland Region	2.66721e+06	6.47983e+06	1	543500	4	950	36	2
412600	33	514200	Newton	704	Hobson Ward	7	Auckland City	02	Auckland Region	2.66719e+06	6.48073e+06	1	412600	6	984	12	2
543300	102	518102	Sherbourne	703	Eden-Albert Ward	7	Auckland City	02	Auckland Region	2.66718e+06	6.4793e+06	1	543300	7	1014	36	2
1592000	3	551800	New Plymouth Central	3301	New Plymouth City Ward	33	New Plymouth District	07	Taranaki Region	2.60285e+06	6.2379e+06	1	1592000	6	999	1	2
1592900	3	551800	New Plymouth Central	3301	New Plymouth City Ward	33	New Plymouth District	07	Taranaki Region	2.6032e+06	6.23791e+06	1	1592900	6	999	1	2
1592800	3	551800	New Plymouth Central	3301	New Plymouth City Ward	33	New Plymouth District	07	Taranaki Region	2.60306e+06	6.23786e+06	1	1592800	6	999	1	2
281510	162	513013	McLaren Park	602	Waitakere Ward	6	Waitakere City	02	Auckland Region	2.65463e+06	6.47668e+06	1	281510	9	1107	73	3
1198602	195	536821	Omanu	2301	Mount Maunganui-Papamoa Ward	23	Tauranga City	04	Bay of Plenty Region	2.79337e+06	6.38835e+06	1	1198602	3	919	64	1
1199201	195	536821	Omanu	2301	Mount Maunganui-Papamoa Ward	23	Tauranga City	04	Bay of Plenty Region	2.79379e+06	6.38835e+06	1	1199201	5	965	68	2
2510600	219	588300	Casebrook	6001	Shirley-Papanui Ward	60	Christchurch City	13	Canterbury Region	2.47745e+06	5.74658e+06	1	2510600	10	1139	99	3
2775701	105	599200	Glenwood	6404	Timaru Ward	64	Timaru District	13	Canterbury Region	2.36711e+06	5.64483e+06	1	2775701	4	953	37	2
2775300	132	599200	Glenwood	6404	Timaru Ward	64	Timaru District	13	Canterbury Region	2.36751e+06	5.64491e+06	1	2775300	3	932	44	1
2774905	165	599300	Gleniti	6404	Timaru Ward	64	Timaru District	13	Canterbury Region	2.36676e+06	5.64484e+06	1	2774905	4	951	58	2
2775600	144	599200	Glenwood	6404	Timaru Ward	64	Timaru District	13	Canterbury Region	2.36713e+06	5.64495e+06	1	2775600	2	905	48	1
416100	69	514000	Freemans Bay	701	Western Bays Ward	7	Auckland City	02	Auckland Region	2.66629e+06	6.48207e+06	1	416100	7	1000	24	2
546500	120	518102	Sherbourne	703	Eden-Albert Ward	7	Auckland City	02	Auckland Region	2.66729e+06	6.47902e+06	1	546500	5	956	42	2
415600	147	514000	Freemans Bay	701	Western Bays Ward	7	Auckland City	02	Auckland Region	2.66605e+06	6.48199e+06	1	415600	5	966	51	2
1595200	105	552002	Marsland Hill	3301	New Plymouth City Ward	33	New Plymouth District	07	Taranaki Region	2.60348e+06	6.23771e+06	1	1595200	6	988	37	2
2119700	27	572900	Thorndon-Tinakori Road	4703	Lambton Ward	47	Wellington City	09	Wellington Region	2.65878e+06	5.99074e+06	1	2119700	5	967	9	2
1596500	123	552001	Mount Bryan	3301	New Plymouth City Ward	33	New Plymouth District	07	Taranaki Region	2.60433e+06	6.23828e+06	1	1596500	7	1013	43	2
2120400	93	572900	Thorndon-Tinakori Road	4703	Lambton Ward	47	Wellington City	09	Wellington Region	2.65889e+06	5.99141e+06	1	2120400	5	962	33	2
417000	156	514000	Freemans Bay	701	Western Bays Ward	7	Auckland City	02	Auckland Region	2.6665e+06	6.48191e+06	1	417000	2	901	51	1
2644900	183	595000	Spreydon	6006	Spreydon-Heathcote Ward	60	Christchurch City	13	Canterbury Region	2.47994e+06	5.73942e+06	1	2644900	7	1003	64	2
2644600	93	595000	Spreydon	6006	Spreydon-Heathcote Ward	60	Christchurch City	13	Canterbury Region	2.47977e+06	5.73918e+06	1	2644600	7	1001	33	2
1202800	6	536810	Mt Maunganui North	2301	Mount Maunganui-Papamoa Ward	23	Tauranga City	04	Bay of Plenty Region	2.79125e+06	6.39052e+06	1	1202800	10	1181	3	3
1202901	15	536810	Mt Maunganui North	2301	Mount Maunganui-Papamoa Ward	23	Tauranga City	04	Bay of Plenty Region	2.79138e+06	6.39039e+06	1	1202901	10	1181	7	3
2643900	129	595000	Spreydon	6006	Spreydon-Heathcote Ward	60	Christchurch City	13	Canterbury Region	2.47968e+06	5.73974e+06	1	2643900	5	961	45	2
547700	240	518201	Balmoral	703	Eden-Albert Ward	7	Auckland City	02	Auckland Region	2.66705e+06	6.47859e+06	1	547700	5	972	84	2
545000	174	518101	Mt Eden North	703	Eden-Albert Ward	7	Auckland City	02	Auckland Region	2.66686e+06	6.47963e+06	1	545000	6	985	61	2
1594000	24	551800	New Plymouth Central	3301	New Plymouth City Ward	33	New Plymouth District	07	Taranaki Region	2.60361e+06	6.23818e+06	1	1594000	7	1013	8	2
1201605	147	536831	Arataki	2301	Mount Maunganui-Papamoa Ward	23	Tauranga City	04	Bay of Plenty Region	2.79455e+06	6.38655e+06	1	1201605	10	1151	66	3
2118800	6	572900	Thorndon-Tinakori Road	4703	Lambton Ward	47	Wellington City	09	Wellington Region	2.65909e+06	5.99101e+06	1	2118800	3	931	2	1
2119000	33	572900	Thorndon-Tinakori Road	4703	Lambton Ward	47	Wellington City	09	Wellington Region	2.65909e+06	5.99096e+06	1	2119000	3	931	11	1
414700	69	514000	Freemans Bay	701	Western Bays Ward	7	Auckland City	02	Auckland Region	2.66626e+06	6.48184e+06	1	414700	2	904	23	1
1200800	153	536831	Arataki	2301	Mount Maunganui-Papamoa Ward	23	Tauranga City	04	Bay of Plenty Region	2.79387e+06	6.38735e+06	1	1200800	10	1323	69	3
2118500	6	572900	Thorndon-Tinakori Road	4703	Lambton Ward	47	Wellington City	09	Wellington Region	2.65905e+06	5.99137e+06	1	2118500	3	931	2	1
1200300	162	536821	Omanu	2301	Mount Maunganui-Papamoa Ward	23	Tauranga City	04	Bay of Plenty Region	2.7937e+06	6.3878e+06	1	1200300	3	924	53	1
414900	60	514000	Freemans Bay	701	Western Bays Ward	7	Auckland City	02	Auckland Region	2.66613e+06	6.48166e+06	1	414900	2	904	20	1
413700	135	514000	Freemans Bay	701	Western Bays Ward	7	Auckland City	02	Auckland Region	2.6665e+06	6.48139e+06	1	413700	2	916	45	1
414500	30	514000	Freemans Bay	701	Western Bays Ward	7	Auckland City	02	Auckland Region	2.66627e+06	6.48127e+06	1	414500	3	924	10	1
2774300	120	598700	Washdyke	6404	Timaru Ward	64	Timaru District	13	Canterbury Region	2.36957e+06	5.64701e+06	1	2774300	5	971	42	2
415000	60	514000	Freemans Bay	701	Western Bays Ward	7	Auckland City	02	Auckland Region	2.66616e+06	6.48158e+06	1	415000	1	895	20	1
1463700	114	545852	Pakipaki	3009	Poukawa Ward	30	Hastings District	06	Hawke's Bay Region	2.83504e+06	6.16129e+06	1	1463700	8	1031	51	3
1593900	6	551800	New Plymouth Central	3301	New Plymouth City Ward	33	New Plymouth District	07	Taranaki Region	2.60332e+06	6.23808e+06	1	1593900	7	1013	2	2
2118300	201	572900	Thorndon-Tinakori Road	4703	Lambton Ward	47	Wellington City	09	Wellington Region	2.6593e+06	5.99086e+06	1	2118300	4	940	70	2
1201000	147	536831	Arataki	2301	Mount Maunganui-Papamoa Ward	23	Tauranga City	04	Bay of Plenty Region	2.79446e+06	6.38719e+06	1	1201000	9	1088	66	3
2643200	36	595000	Spreydon	6006	Spreydon-Heathcote Ward	60	Christchurch City	13	Canterbury Region	2.47931e+06	5.73902e+06	1	2643200	7	1004	13	2
2511700	195	588300	Casebrook	6001	Shirley-Papanui Ward	60	Christchurch City	13	Canterbury Region	2.47795e+06	5.74684e+06	1	2511700	9	1102	88	3
2512000	192	588200	Styx Mill	6001	Shirley-Papanui Ward	60	Christchurch City	13	Canterbury Region	2.47823e+06	5.74726e+06	1	2512000	4	953	67	2
2904100	180	603100	Stuart St-Frederick St	7103	Cargill Ward	71	Dunedin City	14	Otago Region	2.31619e+06	5.47929e+06	1	2904100	6	995	63	2
413800	45	514000	Freemans Bay	701	Western Bays Ward	7	Auckland City	02	Auckland Region	2.66665e+06	6.48107e+06	1	413800	7	1011	16	2
545800	54	518102	Sherbourne	703	Eden-Albert Ward	7	Auckland City	02	Auckland Region	2.66666e+06	6.47948e+06	1	545800	3	924	18	1
544900	150	518101	Mt Eden North	703	Eden-Albert Ward	7	Auckland City	02	Auckland Region	2.66672e+06	6.47964e+06	1	544900	7	1014	52	2
1594600	39	551800	New Plymouth Central	3301	New Plymouth City Ward	33	New Plymouth District	07	Taranaki Region	2.60363e+06	6.23798e+06	1	1594600	6	981	14	2
1593500	9	551800	New Plymouth Central	3301	New Plymouth City Ward	33	New Plymouth District	07	Taranaki Region	2.60394e+06	6.23853e+06	1	1593500	6	981	3	2
1201300	75	536831	Arataki	2301	Mount Maunganui-Papamoa Ward	23	Tauranga City	04	Bay of Plenty Region	2.79438e+06	6.38694e+06	1	1201300	10	1181	34	3
2774606	138	599300	Gleniti	6404	Timaru Ward	64	Timaru District	13	Canterbury Region	2.36577e+06	5.64575e+06	1	2774606	3	920	46	1
2774607	135	599300	Gleniti	6404	Timaru Ward	64	Timaru District	13	Canterbury Region	2.36602e+06	5.64566e+06	1	2774607	3	930	45	1
546400	141	518102	Sherbourne	703	Eden-Albert Ward	7	Auckland City	02	Auckland Region	2.66752e+06	6.47919e+06	1	546400	6	975	49	2
545300	123	518102	Sherbourne	703	Eden-Albert Ward	7	Auckland City	02	Auckland Region	2.66696e+06	6.47936e+06	1	545300	6	991	43	2
413900	120	514000	Freemans Bay	701	Western Bays Ward	7	Auckland City	02	Auckland Region	2.66681e+06	6.48114e+06	1	413900	2	913	40	1
1200401	207	536831	Arataki	2301	Mount Maunganui-Papamoa Ward	23	Tauranga City	04	Bay of Plenty Region	2.79411e+06	6.3875e+06	1	1200401	6	976	72	2
1200600	141	536821	Omanu	2301	Mount Maunganui-Papamoa Ward	23	Tauranga City	04	Bay of Plenty Region	2.79355e+06	6.38763e+06	1	1200600	9	1109	63	3
1200700	156	536821	Omanu	2301	Mount Maunganui-Papamoa Ward	23	Tauranga City	04	Bay of Plenty Region	2.79374e+06	6.38759e+06	1	1200700	7	1028	55	2
2642003	36	594800	Barrington North	6006	Spreydon-Heathcote Ward	60	Christchurch City	13	Canterbury Region	2.47932e+06	5.73863e+06	1	2642003	4	940	13	2
2510900	99	588300	Casebrook	6001	Shirley-Papanui Ward	60	Christchurch City	13	Canterbury Region	2.4776e+06	5.74625e+06	1	2510900	10	1141	45	3
2511100	132	588300	Casebrook	6001	Shirley-Papanui Ward	60	Christchurch City	13	Canterbury Region	2.47752e+06	5.74614e+06	1	2511100	10	1141	59	3
2643300	78	595000	Spreydon	6006	Spreydon-Heathcote Ward	60	Christchurch City	13	Canterbury Region	2.47942e+06	5.73888e+06	1	2643300	6	980	27	2
414200	141	514000	Freemans Bay	701	Western Bays Ward	7	Auckland City	02	Auckland Region	2.66644e+06	6.48152e+06	1	414200	5	954	49	2
414300	63	514000	Freemans Bay	701	Western Bays Ward	7	Auckland City	02	Auckland Region	2.66639e+06	6.48138e+06	1	414300	5	954	22	2
2511601	126	588300	Casebrook	6001	Shirley-Papanui Ward	60	Christchurch City	13	Canterbury Region	2.47779e+06	5.74716e+06	1	2511601	8	1036	57	3
2511602	183	588300	Casebrook	6001	Shirley-Papanui Ward	60	Christchurch City	13	Canterbury Region	2.47806e+06	5.74711e+06	1	2511602	8	1043	82	3
2511502	201	588300	Casebrook	6001	Shirley-Papanui Ward	60	Christchurch City	13	Canterbury Region	2.47766e+06	5.74708e+06	1	2511502	6	992	70	2
2642600	144	595000	Spreydon	6006	Spreydon-Heathcote Ward	60	Christchurch City	13	Canterbury Region	2.47891e+06	5.73979e+06	1	2642600	10	1172	65	3
2643400	216	595000	Spreydon	6006	Spreydon-Heathcote Ward	60	Christchurch City	13	Canterbury Region	2.47917e+06	5.73977e+06	1	2643400	9	1101	97	3
2642500	135	595000	Spreydon	6006	Spreydon-Heathcote Ward	60	Christchurch City	13	Canterbury Region	2.47865e+06	5.7398e+06	1	2642500	10	1143	61	3
1725900	138	556200	Gonville South	3702	Urban Ward	37	Wanganui District	08	Manawatu-Wanganui Region	2.68375e+06	6.1379e+06	1	1725900	8	1052	62	3
2773700	240	598700	Washdyke	6404	Timaru Ward	64	Timaru District	13	Canterbury Region	2.36952e+06	5.64937e+06	1	2773700	7	1028	84	2
2773800	9	598700	Washdyke	6404	Timaru Ward	64	Timaru District	13	Canterbury Region	2.36977e+06	5.64903e+06	1	2773800	5	964	3	2
545700	180	518102	Sherbourne	703	Eden-Albert Ward	7	Auckland City	02	Auckland Region	2.66696e+06	6.47918e+06	1	545700	6	982	63	2
2118900	39	572900	Thorndon-Tinakori Road	4703	Lambton Ward	47	Wellington City	09	Wellington Region	2.65918e+06	5.99107e+06	1	2118900	3	931	13	1
2118100	60	572900	Thorndon-Tinakori Road	4703	Lambton Ward	47	Wellington City	09	Wellington Region	2.65931e+06	5.99104e+06	1	2118100	3	927	20	1
2642001	42	594800	Barrington North	6006	Spreydon-Heathcote Ward	60	Christchurch City	13	Canterbury Region	2.47907e+06	5.73853e+06	1	2642001	4	940	15	2
1200200	171	536821	Omanu	2301	Mount Maunganui-Papamoa Ward	23	Tauranga City	04	Bay of Plenty Region	2.79337e+06	6.38787e+06	1	1200200	10	1158	77	3
2774000	48	598700	Washdyke	6404	Timaru Ward	64	Timaru District	13	Canterbury Region	2.36973e+06	5.64808e+06	1	2774000	5	964	17	2
2773900	24	598700	Washdyke	6404	Timaru Ward	64	Timaru District	13	Canterbury Region	2.36946e+06	5.64867e+06	1	2773900	5	964	8	2
2774100	6	598700	Washdyke	6404	Timaru Ward	64	Timaru District	13	Canterbury Region	2.36995e+06	5.64837e+06	1	2774100	5	964	2	2
2774400	3	598700	Washdyke	6404	Timaru Ward	64	Timaru District	13	Canterbury Region	2.37005e+06	5.64701e+06	1	2774400	5	964	1	2
2774202	237	598700	Washdyke	6404	Timaru Ward	64	Timaru District	13	Canterbury Region	2.36985e+06	5.64725e+06	1	2774202	5	964	83	2
151603	54	508520	Sunnynook	502	Central Ward	5	North Shore City	02	Auckland Region	2.66587e+06	6.49345e+06	1	151603	3	924	18	1
545200	108	518102	Sherbourne	703	Eden-Albert Ward	7	Auckland City	02	Auckland Region	2.66687e+06	6.4794e+06	1	545200	4	944	38	2
2122500	147	572900	Thorndon-Tinakori Road	4703	Lambton Ward	47	Wellington City	09	Wellington Region	2.65901e+06	5.99064e+06	1	2122500	6	985	51	2
1594900	63	552002	Marsland Hill	3301	New Plymouth City Ward	33	New Plymouth District	07	Taranaki Region	2.60402e+06	6.23812e+06	1	1594900	9	1077	28	3
1201606	144	536831	Arataki	2301	Mount Maunganui-Papamoa Ward	23	Tauranga City	04	Bay of Plenty Region	2.79466e+06	6.38654e+06	1	1201606	8	1045	65	3
2118200	93	572900	Thorndon-Tinakori Road	4703	Lambton Ward	47	Wellington City	09	Wellington Region	2.65934e+06	5.99096e+06	1	2118200	4	938	33	2
414800	90	514000	Freemans Bay	701	Western Bays Ward	7	Auckland City	02	Auckland Region	2.66629e+06	6.48176e+06	1	414800	2	914	30	1
2188102	120	576001	Island Bay West	4705	Southern Ward	47	Wellington City	09	Wellington Region	2.65795e+06	5.98374e+06	1	2188102	3	935	40	1
2642700	192	595000	Spreydon	6006	Spreydon-Heathcote Ward	60	Christchurch City	13	Canterbury Region	2.47874e+06	5.73963e+06	1	2642700	6	983	67	2
414400	60	514000	Freemans Bay	701	Western Bays Ward	7	Auckland City	02	Auckland Region	2.66633e+06	6.48131e+06	1	414400	3	924	20	1
415100	192	514000	Freemans Bay	701	Western Bays Ward	7	Auckland City	02	Auckland Region	2.66634e+06	6.48169e+06	1	415100	8	1032	86	3
545500	72	518102	Sherbourne	703	Eden-Albert Ward	7	Auckland City	02	Auckland Region	2.6668e+06	6.47925e+06	1	545500	4	948	25	2
414600	54	514000	Freemans Bay	701	Western Bays Ward	7	Auckland City	02	Auckland Region	2.66613e+06	6.48182e+06	1	414600	1	895	18	1
414100	129	514000	Freemans Bay	701	Western Bays Ward	7	Auckland City	02	Auckland Region	2.66633e+06	6.48158e+06	1	414100	3	931	43	1
1594800	33	552002	Marsland Hill	3301	New Plymouth City Ward	33	New Plymouth District	07	Taranaki Region	2.60379e+06	6.23804e+06	1	1594800	9	1077	15	3
1200900	204	536831	Arataki	2301	Mount Maunganui-Papamoa Ward	23	Tauranga City	04	Bay of Plenty Region	2.79429e+06	6.38706e+06	1	1200900	8	1054	92	3
2118600	9	572900	Thorndon-Tinakori Road	4703	Lambton Ward	47	Wellington City	09	Wellington Region	2.65903e+06	5.99116e+06	1	2118600	3	931	3	1
2118000	171	572900	Thorndon-Tinakori Road	4703	Lambton Ward	47	Wellington City	09	Wellington Region	2.65924e+06	5.99117e+06	1	2118000	4	939	60	2
2512400	198	588200	Styx Mill	6001	Shirley-Papanui Ward	60	Christchurch City	13	Canterbury Region	2.47889e+06	5.74731e+06	1	2512400	9	1096	89	3
2512200	81	588200	Styx Mill	6001	Shirley-Papanui Ward	60	Christchurch City	13	Canterbury Region	2.47846e+06	5.74728e+06	1	2512200	10	1196	36	3
415300	27	514000	Freemans Bay	701	Western Bays Ward	7	Auckland City	02	Auckland Region	2.66656e+06	6.48176e+06	1	415300	2	914	9	1
544800	15	518101	Mt Eden North	703	Eden-Albert Ward	7	Auckland City	02	Auckland Region	2.66656e+06	6.4796e+06	1	544800	6	979	5	2
545100	123	518102	Sherbourne	703	Eden-Albert Ward	7	Auckland City	02	Auckland Region	2.66675e+06	6.47944e+06	1	545100	6	990	43	2
415200	21	514000	Freemans Bay	701	Western Bays Ward	7	Auckland City	02	Auckland Region	2.66649e+06	6.4817e+06	1	415200	2	900	7	1
545400	111	518102	Sherbourne	703	Eden-Albert Ward	7	Auckland City	02	Auckland Region	2.66707e+06	6.47933e+06	1	545400	6	987	39	2
414000	114	514000	Freemans Bay	701	Western Bays Ward	7	Auckland City	02	Auckland Region	2.66618e+06	6.48145e+06	1	414000	3	924	38	1
1594500	15	551800	New Plymouth Central	3301	New Plymouth City Ward	33	New Plymouth District	07	Taranaki Region	2.60342e+06	6.2379e+06	1	1594500	6	981	5	2
546300	78	518102	Sherbourne	703	Eden-Albert Ward	7	Auckland City	02	Auckland Region	2.66734e+06	6.47913e+06	1	546300	3	924	26	1
2642002	57	594800	Barrington North	6006	Spreydon-Heathcote Ward	60	Christchurch City	13	Canterbury Region	2.4792e+06	5.73856e+06	1	2642002	4	940	20	2
2511000	117	588300	Casebrook	6001	Shirley-Papanui Ward	60	Christchurch City	13	Canterbury Region	2.47729e+06	5.74627e+06	1	2511000	8	1036	53	3
2511800	129	588300	Casebrook	6001	Shirley-Papanui Ward	60	Christchurch City	13	Canterbury Region	2.47794e+06	5.74662e+06	1	2511800	8	1059	58	3
2515203	120	590400	Belfast	6001	Shirley-Papanui Ward	60	Christchurch City	13	Canterbury Region	2.47947e+06	5.75016e+06	1	2515203	3	928	40	1
2515106	105	590400	Belfast	6001	Shirley-Papanui Ward	60	Christchurch City	13	Canterbury Region	2.47927e+06	5.75037e+06	1	2515106	3	926	35	1
2515201	216	590400	Belfast	6001	Shirley-Papanui Ward	60	Christchurch City	13	Canterbury Region	2.47964e+06	5.75022e+06	1	2515201	5	971	76	2
2515103	135	590400	Belfast	6001	Shirley-Papanui Ward	60	Christchurch City	13	Canterbury Region	2.47901e+06	5.7504e+06	1	2515103	1	892	45	1
2515108	30	590400	Belfast	6001	Shirley-Papanui Ward	60	Christchurch City	13	Canterbury Region	2.47921e+06	5.75015e+06	1	2515108	2	914	10	1
2515107	54	590400	Belfast	6001	Shirley-Papanui Ward	60	Christchurch City	13	Canterbury Region	2.47922e+06	5.75024e+06	1	2515107	2	914	18	1
681308	3	522722	Aberfeldy	806	Howick Ward	8	Manukau City	02	Auckland Region	2.68045e+06	6.47628e+06	1	681308	8	1032	1	3
2121300	3	572900	Thorndon-Tinakori Road	4703	Lambton Ward	47	Wellington City	09	Wellington Region	2.65888e+06	5.99074e+06	1	2121300	7	1009	1	2
1598000	9	552100	Fitzroy	3301	New Plymouth City Ward	33	New Plymouth District	07	Taranaki Region	2.60482e+06	6.23829e+06	1	1598000	4	944	3	2
2513100	141	588200	Styx Mill	6001	Shirley-Papanui Ward	60	Christchurch City	13	Canterbury Region	2.47893e+06	5.74809e+06	1	2513100	5	956	49	2
416600	108	514000	Freemans Bay	701	Western Bays Ward	7	Auckland City	02	Auckland Region	2.66652e+06	6.48214e+06	1	416600	2	903	36	1
2774801	165	599300	Gleniti	6404	Timaru Ward	64	Timaru District	13	Canterbury Region	2.36611e+06	5.64539e+06	1	2774801	2	905	54	1
415900	12	514000	Freemans Bay	701	Western Bays Ward	7	Auckland City	02	Auckland Region	2.66627e+06	6.48217e+06	1	415900	3	920	4	1
678502	132	522603	Bleakhouse	806	Howick Ward	8	Manukau City	02	Auckland Region	2.68171e+06	6.47782e+06	1	678502	1	886	44	1
416200	36	514000	Freemans Bay	701	Western Bays Ward	7	Auckland City	02	Auckland Region	2.66618e+06	6.4821e+06	1	416200	8	1060	16	3
547100	111	518102	Sherbourne	703	Eden-Albert Ward	7	Auckland City	02	Auckland Region	2.66733e+06	6.47887e+06	1	547100	7	1017	39	2
415800	60	514000	Freemans Bay	701	Western Bays Ward	7	Auckland City	02	Auckland Region	2.66617e+06	6.4822e+06	1	415800	3	920	20	1
1595500	141	552002	Marsland Hill	3301	New Plymouth City Ward	33	New Plymouth District	07	Taranaki Region	2.6038e+06	6.23762e+06	1	1595500	1	886	47	1
1596600	96	552001	Mount Bryan	3301	New Plymouth City Ward	33	New Plymouth District	07	Taranaki Region	2.60437e+06	6.23813e+06	1	1596600	5	967	34	2
1595300	81	552002	Marsland Hill	3301	New Plymouth City Ward	33	New Plymouth District	07	Taranaki Region	2.60323e+06	6.23764e+06	1	1595300	8	1042	36	3
2119400	33	572900	Thorndon-Tinakori Road	4703	Lambton Ward	47	Wellington City	09	Wellington Region	2.65883e+06	5.99098e+06	1	2119400	6	977	12	2
678801	285	522603	Bleakhouse	806	Howick Ward	8	Manukau City	02	Auckland Region	2.68176e+06	6.47758e+06	1	678801	4	935	100	2
2645200	123	595400	Somerfield	6006	Spreydon-Heathcote Ward	60	Christchurch City	13	Canterbury Region	2.47949e+06	5.73879e+06	1	2645200	4	936	43	2
1202902	63	536810	Mt Maunganui North	2301	Mount Maunganui-Papamoa Ward	23	Tauranga City	04	Bay of Plenty Region	2.79154e+06	6.39034e+06	1	1202902	10	1181	28	3
678602	45	522603	Bleakhouse	806	Howick Ward	8	Manukau City	02	Auckland Region	2.68197e+06	6.47768e+06	1	678602	1	886	15	1
2643700	138	595000	Spreydon	6006	Spreydon-Heathcote Ward	60	Christchurch City	13	Canterbury Region	2.47928e+06	5.73963e+06	1	2643700	8	1065	62	3
2644700	126	595000	Spreydon	6006	Spreydon-Heathcote Ward	60	Christchurch City	13	Canterbury Region	2.47974e+06	5.73967e+06	1	2644700	6	985	44	2
415400	57	514000	Freemans Bay	701	Western Bays Ward	7	Auckland City	02	Auckland Region	2.66602e+06	6.48225e+06	1	415400	2	900	19	1
1726300	81	556200	Gonville South	3702	Urban Ward	37	Wanganui District	08	Manawatu-Wanganui Region	2.68411e+06	6.13838e+06	1	1726300	6	994	28	2
2775500	249	599200	Glenwood	6404	Timaru Ward	64	Timaru District	13	Canterbury Region	2.36708e+06	5.64515e+06	1	2775500	2	900	82	1
2774803	90	599300	Gleniti	6404	Timaru Ward	64	Timaru District	13	Canterbury Region	2.36651e+06	5.64528e+06	1	2774803	4	940	31	2
2774804	99	599300	Gleniti	6404	Timaru Ward	64	Timaru District	13	Canterbury Region	2.36675e+06	5.64526e+06	1	2774804	4	940	35	2
678601	126	522603	Bleakhouse	806	Howick Ward	8	Manukau City	02	Auckland Region	2.68201e+06	6.47781e+06	1	678601	1	886	42	1
1595000	162	552002	Marsland Hill	3301	New Plymouth City Ward	33	New Plymouth District	07	Taranaki Region	2.60403e+06	6.23798e+06	1	1595000	8	1048	73	3
1596000	150	552001	Mount Bryan	3301	New Plymouth City Ward	33	New Plymouth District	07	Taranaki Region	2.60412e+06	6.23866e+06	1	1596000	5	957	52	2
1595800	150	552001	Mount Bryan	3301	New Plymouth City Ward	33	New Plymouth District	07	Taranaki Region	2.60382e+06	6.23868e+06	1	1595800	7	1007	52	2
2645100	150	595400	Somerfield	6006	Spreydon-Heathcote Ward	60	Christchurch City	13	Canterbury Region	2.47978e+06	5.73903e+06	1	2645100	6	983	52	2
2644400	84	595000	Spreydon	6006	Spreydon-Heathcote Ward	60	Christchurch City	13	Canterbury Region	2.47957e+06	5.73904e+06	1	2644400	7	1001	29	2
416900	102	514000	Freemans Bay	701	Western Bays Ward	7	Auckland City	02	Auckland Region	2.66643e+06	6.482e+06	1	416900	4	942	36	2
546700	168	518102	Sherbourne	703	Eden-Albert Ward	7	Auckland City	02	Auckland Region	2.66752e+06	6.47871e+06	1	546700	4	947	59	2
1726500	54	556200	Gonville South	3702	Urban Ward	37	Wanganui District	08	Manawatu-Wanganui Region	2.68421e+06	6.13812e+06	1	1726500	7	1010	19	2
1727400	36	557000	Spriggens Park	3702	Urban Ward	37	Wanganui District	08	Manawatu-Wanganui Region	2.68456e+06	6.13825e+06	1	1727400	9	1131	16	3
2774805	78	599300	Gleniti	6404	Timaru Ward	64	Timaru District	13	Canterbury Region	2.36647e+06	5.64517e+06	1	2774805	4	940	27	2
2775100	84	599200	Glenwood	6404	Timaru Ward	64	Timaru District	13	Canterbury Region	2.36744e+06	5.64511e+06	1	2775100	9	1100	38	3
2514100	141	590400	Belfast	6001	Shirley-Papanui Ward	60	Christchurch City	13	Canterbury Region	2.48052e+06	5.75151e+06	1	2514100	7	1019	49	2
2514200	174	590400	Belfast	6001	Shirley-Papanui Ward	60	Christchurch City	13	Canterbury Region	2.48045e+06	5.75136e+06	1	2514200	8	1044	78	3
416300	93	514000	Freemans Bay	701	Western Bays Ward	7	Auckland City	02	Auckland Region	2.66619e+06	6.482e+06	1	416300	8	1060	42	3
1595100	108	552002	Marsland Hill	3301	New Plymouth City Ward	33	New Plymouth District	07	Taranaki Region	2.60375e+06	6.23791e+06	1	1595100	7	1021	38	2
2120000	78	572900	Thorndon-Tinakori Road	4703	Lambton Ward	47	Wellington City	09	Wellington Region	2.65863e+06	5.99076e+06	1	2120000	5	967	27	2
1596300	123	552001	Mount Bryan	3301	New Plymouth City Ward	33	New Plymouth District	07	Taranaki Region	2.60449e+06	6.23846e+06	1	1596300	5	962	43	2
1596100	39	552001	Mount Bryan	3301	New Plymouth City Ward	33	New Plymouth District	07	Taranaki Region	2.60419e+06	6.23851e+06	1	1596100	5	967	14	2
416700	66	514000	Freemans Bay	701	Western Bays Ward	7	Auckland City	02	Auckland Region	2.66664e+06	6.4821e+06	1	416700	2	900	22	1
678400	237	522603	Bleakhouse	806	Howick Ward	8	Manukau City	02	Auckland Region	2.68192e+06	6.47806e+06	1	678400	1	884	78	1
2513502	108	590400	Belfast	6001	Shirley-Papanui Ward	60	Christchurch City	13	Canterbury Region	2.48025e+06	5.75065e+06	1	2513502	6	997	38	2
2513501	240	590400	Belfast	6001	Shirley-Papanui Ward	60	Christchurch City	13	Canterbury Region	2.48005e+06	5.75065e+06	1	2513501	6	995	84	2
547002	60	518102	Sherbourne	703	Eden-Albert Ward	7	Auckland City	02	Auckland Region	2.66715e+06	6.47877e+06	1	547002	7	1000	21	2
2079000	93	573800	Johnsonville East	4701	Northern Ward	47	Wellington City	09	Wellington Region	2.66186e+06	5.997e+06	1	2079000	4	953	33	2
678200	201	522603	Bleakhouse	806	Howick Ward	8	Manukau City	02	Auckland Region	2.68177e+06	6.4783e+06	1	678200	1	896	66	1
1595400	117	552002	Marsland Hill	3301	New Plymouth City Ward	33	New Plymouth District	07	Taranaki Region	2.6038e+06	6.23779e+06	1	1595400	4	938	41	2
2120100	45	572900	Thorndon-Tinakori Road	4703	Lambton Ward	47	Wellington City	09	Wellington Region	2.65846e+06	5.99074e+06	1	2120100	5	967	16	2
2119900	15	572900	Thorndon-Tinakori Road	4703	Lambton Ward	47	Wellington City	09	Wellington Region	2.65868e+06	5.99072e+06	1	2119900	5	967	5	2
2120900	138	572900	Thorndon-Tinakori Road	4703	Lambton Ward	47	Wellington City	09	Wellington Region	2.65866e+06	5.9911e+06	1	2120900	4	950	48	2
1596400	69	552001	Mount Bryan	3301	New Plymouth City Ward	33	New Plymouth District	07	Taranaki Region	2.60425e+06	6.23842e+06	1	1596400	7	1009	24	2
2120300	84	572900	Thorndon-Tinakori Road	4703	Lambton Ward	47	Wellington City	09	Wellington Region	2.65903e+06	5.99151e+06	1	2120300	2	904	28	1
2644500	105	595000	Spreydon	6006	Spreydon-Heathcote Ward	60	Christchurch City	13	Canterbury Region	2.47966e+06	5.7392e+06	1	2644500	9	1126	47	3
1202700	6	536810	Mt Maunganui North	2301	Mount Maunganui-Papamoa Ward	23	Tauranga City	04	Bay of Plenty Region	2.79122e+06	6.39063e+06	1	1202700	10	1181	3	3
2643600	156	595000	Spreydon	6006	Spreydon-Heathcote Ward	60	Christchurch City	13	Canterbury Region	2.47952e+06	5.73981e+06	1	2643600	10	1217	70	3
1726700	48	556200	Gonville South	3702	Urban Ward	37	Wanganui District	08	Manawatu-Wanganui Region	2.68444e+06	6.13811e+06	1	1726700	6	994	17	2
1726200	69	556200	Gonville South	3702	Urban Ward	37	Wanganui District	08	Manawatu-Wanganui Region	2.68413e+06	6.13789e+06	1	1726200	9	1101	31	3
416000	165	514000	Freemans Bay	701	Western Bays Ward	7	Auckland City	02	Auckland Region	2.66637e+06	6.48216e+06	1	416000	7	1000	58	2
2775800	120	599200	Glenwood	6404	Timaru Ward	64	Timaru District	13	Canterbury Region	2.36744e+06	5.64473e+06	1	2775800	3	920	40	1
1727300	3	557000	Spriggens Park	3702	Urban Ward	37	Wanganui District	08	Manawatu-Wanganui Region	2.68499e+06	6.13854e+06	1	1727300	9	1075	1	3
2513505	78	590400	Belfast	6001	Shirley-Papanui Ward	60	Christchurch City	13	Canterbury Region	2.47973e+06	5.75002e+06	1	2513505	2	905	26	1
2091400	120	574302	Te Kainga	4702	Onslow-Western Ward	47	Wellington City	09	Wellington Region	2.66031e+06	5.99378e+06	1	2091400	1	855	40	1
1726900	123	557000	Spriggens Park	3702	Urban Ward	37	Wanganui District	08	Manawatu-Wanganui Region	2.68435e+06	6.13852e+06	1	1726900	9	1074	55	3
415700	72	514000	Freemans Bay	701	Western Bays Ward	7	Auckland City	02	Auckland Region	2.66605e+06	6.48178e+06	1	415700	2	907	24	1
1465300	24	545762	Longlands South	3003	Heretaunga Ward	30	Hastings District	06	Hawke's Bay Region	2.83942e+06	6.16248e+06	1	1465300	2	917	8	1
547400	153	518201	Balmoral	703	Eden-Albert Ward	7	Auckland City	02	Auckland Region	2.66696e+06	6.47878e+06	1	547400	4	936	54	2
546800	204	518102	Sherbourne	703	Eden-Albert Ward	7	Auckland City	02	Auckland Region	2.66714e+06	6.47909e+06	1	546800	6	978	71	2
678802	39	522603	Bleakhouse	806	Howick Ward	8	Manukau City	02	Auckland Region	2.68201e+06	6.47759e+06	1	678802	1	891	13	1
2121000	159	572900	Thorndon-Tinakori Road	4703	Lambton Ward	47	Wellington City	09	Wellington Region	2.65859e+06	5.99101e+06	1	2121000	3	926	52	1
2120500	99	572900	Thorndon-Tinakori Road	4703	Lambton Ward	47	Wellington City	09	Wellington Region	2.65894e+06	5.99136e+06	1	2120500	3	927	33	1
1726100	75	556200	Gonville South	3702	Urban Ward	37	Wanganui District	08	Manawatu-Wanganui Region	2.68383e+06	6.13766e+06	1	1726100	7	1022	26	2
1727100	30	557000	Spriggens Park	3702	Urban Ward	37	Wanganui District	08	Manawatu-Wanganui Region	2.68459e+06	6.13844e+06	1	1727100	9	1131	14	3
2513800	87	590400	Belfast	6001	Shirley-Papanui Ward	60	Christchurch City	13	Canterbury Region	2.4797e+06	5.74983e+06	1	2513800	4	937	30	2
2513506	90	590400	Belfast	6001	Shirley-Papanui Ward	60	Christchurch City	13	Canterbury Region	2.47987e+06	5.75003e+06	1	2513506	2	905	30	1
2775202	123	599200	Glenwood	6404	Timaru Ward	64	Timaru District	13	Canterbury Region	2.36756e+06	5.6453e+06	1	2775202	8	1064	55	3
2775402	204	599200	Glenwood	6404	Timaru Ward	64	Timaru District	13	Canterbury Region	2.36721e+06	5.64534e+06	1	2775402	6	977	71	2
1727000	87	557000	Spriggens Park	3702	Urban Ward	37	Wanganui District	08	Manawatu-Wanganui Region	2.68468e+06	6.13882e+06	1	1727000	8	1071	39	3
416500	48	514000	Freemans Bay	701	Western Bays Ward	7	Auckland City	02	Auckland Region	2.6664e+06	6.48204e+06	1	416500	2	916	16	1
964900	63	527503	Cambridge Central	1702	Cambridge Ward	17	Waipa District	03	Waikato Region	2.7272e+06	6.36466e+06	1	964900	6	985	22	2
1595600	132	552002	Marsland Hill	3301	New Plymouth City Ward	33	New Plymouth District	07	Taranaki Region	2.60348e+06	6.23757e+06	1	1595600	4	945	46	2
2119600	36	572900	Thorndon-Tinakori Road	4703	Lambton Ward	47	Wellington City	09	Wellington Region	2.65889e+06	5.99096e+06	1	2119600	6	977	13	2
416800	48	514000	Freemans Bay	701	Western Bays Ward	7	Auckland City	02	Auckland Region	2.66669e+06	6.48198e+06	1	416800	2	900	16	1
1203000	141	536810	Mt Maunganui North	2301	Mount Maunganui-Papamoa Ward	23	Tauranga City	04	Bay of Plenty Region	2.7915e+06	6.39012e+06	1	1203000	7	1024	49	2
415500	78	514000	Freemans Bay	701	Western Bays Ward	7	Auckland City	02	Auckland Region	2.66601e+06	6.48216e+06	1	415500	3	920	26	1
2514000	33	590400	Belfast	6001	Shirley-Papanui Ward	60	Christchurch City	13	Canterbury Region	2.48053e+06	5.75174e+06	1	2514000	4	937	12	2
546900	96	518102	Sherbourne	703	Eden-Albert Ward	7	Auckland City	02	Auckland Region	2.66708e+06	6.4789e+06	1	546900	4	944	34	2
417100	51	514000	Freemans Bay	701	Western Bays Ward	7	Auckland City	02	Auckland Region	2.66661e+06	6.48188e+06	1	417100	6	975	18	2
547200	111	518102	Sherbourne	703	Eden-Albert Ward	7	Auckland City	02	Auckland Region	2.66734e+06	6.47871e+06	1	547200	6	981	39	2
1596200	12	552001	Mount Bryan	3301	New Plymouth City Ward	33	New Plymouth District	07	Taranaki Region	2.60446e+06	6.23857e+06	1	1596200	5	967	4	2
1595900	66	552001	Mount Bryan	3301	New Plymouth City Ward	33	New Plymouth District	07	Taranaki Region	2.60385e+06	6.2386e+06	1	1595900	5	958	23	2
1595700	57	552001	Mount Bryan	3301	New Plymouth City Ward	33	New Plymouth District	07	Taranaki Region	2.60355e+06	6.23858e+06	1	1595700	7	1007	20	2
2120700	126	572900	Thorndon-Tinakori Road	4703	Lambton Ward	47	Wellington City	09	Wellington Region	2.65875e+06	5.99123e+06	1	2120700	6	985	44	2
2645300	111	595400	Somerfield	6006	Spreydon-Heathcote Ward	60	Christchurch City	13	Canterbury Region	2.47987e+06	5.73895e+06	1	2645300	7	1029	39	2
546600	93	518102	Sherbourne	703	Eden-Albert Ward	7	Auckland City	02	Auckland Region	2.66746e+06	6.47901e+06	1	546600	6	989	33	2
1203204	108	536810	Mt Maunganui North	2301	Mount Maunganui-Papamoa Ward	23	Tauranga City	04	Bay of Plenty Region	2.79161e+06	6.3899e+06	1	1203204	8	1050	49	3
2644300	129	595000	Spreydon	6006	Spreydon-Heathcote Ward	60	Christchurch City	13	Canterbury Region	2.47956e+06	5.73926e+06	1	2644300	5	962	45	2
2644800	135	595000	Spreydon	6006	Spreydon-Heathcote Ward	60	Christchurch City	13	Canterbury Region	2.47984e+06	5.73959e+06	1	2644800	8	1064	61	3
1726600	138	556200	Gonville South	3702	Urban Ward	37	Wanganui District	08	Manawatu-Wanganui Region	2.68432e+06	6.13807e+06	1	1726600	8	1030	62	3
1726400	126	556200	Gonville South	3702	Urban Ward	37	Wanganui District	08	Manawatu-Wanganui Region	2.68386e+06	6.13802e+06	1	1726400	7	1010	44	2
2775201	102	599200	Glenwood	6404	Timaru Ward	64	Timaru District	13	Canterbury Region	2.36758e+06	5.64503e+06	1	2775201	8	1064	46	3
2774903	90	599300	Gleniti	6404	Timaru Ward	64	Timaru District	13	Canterbury Region	2.36638e+06	5.64503e+06	1	2774903	4	951	31	2
2774904	57	599300	Gleniti	6404	Timaru Ward	64	Timaru District	13	Canterbury Region	2.36665e+06	5.64504e+06	1	2774904	4	951	20	2
2774902	126	599300	Gleniti	6404	Timaru Ward	64	Timaru District	13	Canterbury Region	2.3668e+06	5.64498e+06	1	2774902	5	958	44	2
2513200	342	590400	Belfast	6001	Shirley-Papanui Ward	60	Christchurch City	13	Canterbury Region	2.48027e+06	5.75093e+06	1	2513200	6	996	120	2
416400	78	514000	Freemans Bay	701	Western Bays Ward	7	Auckland City	02	Auckland Region	2.66625e+06	6.48195e+06	1	416400	2	916	26	1
678501	222	522603	Bleakhouse	806	Howick Ward	8	Manukau City	02	Auckland Region	2.68166e+06	6.478e+06	1	678501	1	896	73	1
547001	102	518102	Sherbourne	703	Eden-Albert Ward	7	Auckland City	02	Auckland Region	2.66724e+06	6.47892e+06	1	547001	7	1000	36	2
2120200	30	572900	Thorndon-Tinakori Road	4703	Lambton Ward	47	Wellington City	09	Wellington Region	2.65895e+06	5.99159e+06	1	2120200	5	962	10	2
419300	30	515500	Arch Hill	701	Western Bays Ward	7	Auckland City	02	Auckland Region	2.66598e+06	6.48009e+06	1	419300	3	918	10	1
1468400	93	545762	Longlands South	3003	Heretaunga Ward	30	Hastings District	06	Hawke's Bay Region	2.83919e+06	6.1635e+06	1	1468400	2	904	31	1
550400	99	518202	Mt Eden East	703	Eden-Albert Ward	7	Auckland City	02	Auckland Region	2.66727e+06	6.4783e+06	1	550400	5	959	35	2
681338	150	522722	Aberfeldy	806	Howick Ward	8	Manukau City	02	Auckland Region	2.68043e+06	6.4751e+06	1	681338	4	949	52	2
2516900	171	589000	Wairarapa	6002	Fendalton-Waimairi Ward	60	Christchurch City	13	Canterbury Region	2.47626e+06	5.74524e+06	1	2516900	4	939	60	2
419400	129	515500	Arch Hill	701	Western Bays Ward	7	Auckland City	02	Auckland Region	2.66609e+06	6.48016e+06	1	419400	3	920	43	1
681329	159	522722	Aberfeldy	806	Howick Ward	8	Manukau City	02	Auckland Region	2.68054e+06	6.47593e+06	1	681329	7	1017	56	2
549600	66	518201	Balmoral	703	Eden-Albert Ward	7	Auckland City	02	Auckland Region	2.6669e+06	6.47829e+06	1	549600	5	954	23	2
1598102	45	552100	Fitzroy	3301	New Plymouth City Ward	33	New Plymouth District	07	Taranaki Region	2.6051e+06	6.23826e+06	1	1598102	5	961	16	2
1597000	75	552100	Fitzroy	3301	New Plymouth City Ward	33	New Plymouth District	07	Taranaki Region	2.60475e+06	6.23881e+06	1	1597000	3	931	25	1
1204401	12	536821	Omanu	2301	Mount Maunganui-Papamoa Ward	23	Tauranga City	04	Bay of Plenty Region	2.79308e+06	6.38768e+06	1	1204401	8	1035	5	3
2646300	159	595400	Somerfield	6006	Spreydon-Heathcote Ward	60	Christchurch City	13	Canterbury Region	2.48007e+06	5.7388e+06	1	2646300	4	947	56	2
1203600	24	536821	Omanu	2301	Mount Maunganui-Papamoa Ward	23	Tauranga City	04	Bay of Plenty Region	2.79213e+06	6.38895e+06	1	1203600	7	1024	8	2
1466502	231	548831	Te Mata	3008	Havelock North Ward	30	Hastings District	06	Hawke's Bay Region	2.84476e+06	6.16344e+06	1	1466502	1	896	76	1
1466413	78	548831	Te Mata	3008	Havelock North Ward	30	Hastings District	06	Hawke's Bay Region	2.84442e+06	6.1635e+06	1	1466413	1	881	26	1
417300	33	514000	Freemans Bay	701	Western Bays Ward	7	Auckland City	02	Auckland Region	2.66674e+06	6.48177e+06	1	417300	6	975	12	2
1597300	132	552100	Fitzroy	3301	New Plymouth City Ward	33	New Plymouth District	07	Taranaki Region	2.60516e+06	6.2387e+06	1	1597300	7	1026	46	2
1597100	45	552100	Fitzroy	3301	New Plymouth City Ward	33	New Plymouth District	07	Taranaki Region	2.60458e+06	6.23869e+06	1	1597100	3	931	15	1
418500	18	515500	Arch Hill	701	Western Bays Ward	7	Auckland City	02	Auckland Region	2.66619e+06	6.48017e+06	1	418500	5	966	6	2
1466707	162	548833	Te Mata Hills	3008	Havelock North Ward	30	Hastings District	06	Hawke's Bay Region	2.84456e+06	6.16308e+06	1	1466707	1	897	53	1
2121200	144	572900	Thorndon-Tinakori Road	4703	Lambton Ward	47	Wellington City	09	Wellington Region	2.65902e+06	5.99082e+06	1	2121200	7	1009	50	2
1597500	36	552100	Fitzroy	3301	New Plymouth City Ward	33	New Plymouth District	07	Taranaki Region	2.60513e+06	6.23855e+06	1	1597500	4	941	13	2
1597700	66	552100	Fitzroy	3301	New Plymouth City Ward	33	New Plymouth District	07	Taranaki Region	2.6047e+06	6.2385e+06	1	1597700	5	958	23	2
1203900	3	536821	Omanu	2301	Mount Maunganui-Papamoa Ward	23	Tauranga City	04	Bay of Plenty Region	2.79189e+06	6.38809e+06	1	1203900	8	1035	1	3
1204000	12	536821	Omanu	2301	Mount Maunganui-Papamoa Ward	23	Tauranga City	04	Bay of Plenty Region	2.79253e+06	6.38825e+06	1	1204000	8	1035	5	3
2514900	48	590400	Belfast	6001	Shirley-Papanui Ward	60	Christchurch City	13	Canterbury Region	2.4798e+06	5.75057e+06	1	2514900	7	1005	17	2
2515000	135	590400	Belfast	6001	Shirley-Papanui Ward	60	Christchurch City	13	Canterbury Region	2.47965e+06	5.7505e+06	1	2515000	5	955	47	2
2515105	105	590400	Belfast	6001	Shirley-Papanui Ward	60	Christchurch City	13	Canterbury Region	2.47939e+06	5.75046e+06	1	2515105	4	938	37	2
2515110	138	590400	Belfast	6001	Shirley-Papanui Ward	60	Christchurch City	13	Canterbury Region	2.47914e+06	5.75041e+06	1	2515110	4	935	48	2
681332	72	522722	Aberfeldy	806	Howick Ward	8	Manukau City	02	Auckland Region	2.68022e+06	6.475e+06	1	681332	5	967	25	2
1466706	204	548833	Te Mata Hills	3008	Havelock North Ward	30	Hastings District	06	Hawke's Bay Region	2.84454e+06	6.16286e+06	1	1466706	1	860	67	1
1466705	195	548832	Havelock North Central	3008	Havelock North Ward	30	Hastings District	06	Hawke's Bay Region	2.84427e+06	6.16291e+06	1	1466705	2	910	64	1
418400	90	515500	Arch Hill	701	Western Bays Ward	7	Auckland City	02	Auckland Region	2.66625e+06	6.48026e+06	1	418400	5	966	31	2
1466600	93	545750	Brookvale	3004	Clive Ward	30	Hastings District	06	Hawke's Bay Region	2.84597e+06	6.16456e+06	1	1466600	5	957	33	2
417600	153	515500	Arch Hill	701	Western Bays Ward	7	Auckland City	02	Auckland Region	2.6667e+06	6.4808e+06	1	417600	5	967	54	2
1598101	126	552100	Fitzroy	3301	New Plymouth City Ward	33	New Plymouth District	07	Taranaki Region	2.605e+06	6.23836e+06	1	1598101	5	961	44	2
1597900	36	552100	Fitzroy	3301	New Plymouth City Ward	33	New Plymouth District	07	Taranaki Region	2.60514e+06	6.2384e+06	1	1597900	4	944	13	2
2645400	45	595400	Somerfield	6006	Spreydon-Heathcote Ward	60	Christchurch City	13	Canterbury Region	2.47999e+06	5.73893e+06	1	2645400	7	1029	16	2
2645800	159	595400	Somerfield	6006	Spreydon-Heathcote Ward	60	Christchurch City	13	Canterbury Region	2.48015e+06	5.73918e+06	1	2645800	2	912	52	1
2515109	36	588401	Belfast South	6001	Shirley-Papanui Ward	60	Christchurch City	13	Canterbury Region	2.47918e+06	5.75012e+06	1	2515109	2	914	12	1
2515112	147	588401	Belfast South	6001	Shirley-Papanui Ward	60	Christchurch City	13	Canterbury Region	2.47874e+06	5.74998e+06	1	2515112	1	884	49	1
2515111	36	588401	Belfast South	6001	Shirley-Papanui Ward	60	Christchurch City	13	Canterbury Region	2.47897e+06	5.75022e+06	1	2515111	4	935	13	2
417800	15	515500	Arch Hill	701	Western Bays Ward	7	Auckland City	02	Auckland Region	2.66645e+06	6.48065e+06	1	417800	6	979	5	2
1466501	69	545750	Brookvale	3004	Clive Ward	30	Hastings District	06	Hawke's Bay Region	2.84528e+06	6.16411e+06	1	1466501	5	957	24	2
681324	186	522722	Aberfeldy	806	Howick Ward	8	Manukau City	02	Auckland Region	2.68023e+06	6.47604e+06	1	681324	7	1029	65	2
2122400	63	572900	Thorndon-Tinakori Road	4703	Lambton Ward	47	Wellington City	09	Wellington Region	2.65862e+06	5.99066e+06	1	2122400	4	947	22	2
1597200	135	552100	Fitzroy	3301	New Plymouth City Ward	33	New Plymouth District	07	Taranaki Region	2.60505e+06	6.23888e+06	1	1597200	5	970	47	2
1204403	81	536831	Arataki	2301	Mount Maunganui-Papamoa Ward	23	Tauranga City	04	Bay of Plenty Region	2.79424e+06	6.38648e+06	1	1204403	8	1035	36	3
1204300	54	536821	Omanu	2301	Mount Maunganui-Papamoa Ward	23	Tauranga City	04	Bay of Plenty Region	2.79218e+06	6.38771e+06	1	1204300	8	1035	24	3
2645500	165	595400	Somerfield	6006	Spreydon-Heathcote Ward	60	Christchurch City	13	Canterbury Region	2.47954e+06	5.73862e+06	1	2645500	5	972	58	2
2645900	186	595400	Somerfield	6006	Spreydon-Heathcote Ward	60	Christchurch City	13	Canterbury Region	2.48022e+06	5.73908e+06	1	2645900	5	964	65	2
680601	204	522712	Murvale	806	Howick Ward	8	Manukau City	02	Auckland Region	2.68145e+06	6.47761e+06	1	680601	3	928	67	1
2514700	504	590400	Belfast	6001	Shirley-Papanui Ward	60	Christchurch City	13	Canterbury Region	2.48031e+06	5.7517e+06	1	2514700	4	939	176	2
418000	57	515500	Arch Hill	701	Western Bays Ward	7	Auckland City	02	Auckland Region	2.66643e+06	6.48052e+06	1	418000	6	979	20	2
1466414	60	548831	Te Mata	3008	Havelock North Ward	30	Hastings District	06	Hawke's Bay Region	2.84466e+06	6.16342e+06	1	1466414	1	886	20	1
2121700	81	572900	Thorndon-Tinakori Road	4703	Lambton Ward	47	Wellington City	09	Wellington Region	2.65832e+06	5.99056e+06	1	2121700	4	943	28	2
2121100	30	572900	Thorndon-Tinakori Road	4703	Lambton Ward	47	Wellington City	09	Wellington Region	2.65885e+06	5.99086e+06	1	2121100	7	1009	10	2
1597800	57	552100	Fitzroy	3301	New Plymouth City Ward	33	New Plymouth District	07	Taranaki Region	2.60479e+06	6.23853e+06	1	1597800	5	958	20	2
1597400	123	552100	Fitzroy	3301	New Plymouth City Ward	33	New Plymouth District	07	Taranaki Region	2.60496e+06	6.23864e+06	1	1597400	4	941	43	2
1597600	30	552100	Fitzroy	3301	New Plymouth City Ward	33	New Plymouth District	07	Taranaki Region	2.60525e+06	6.23858e+06	1	1597600	4	941	10	2
2646000	135	595400	Somerfield	6006	Spreydon-Heathcote Ward	60	Christchurch City	13	Canterbury Region	2.48029e+06	5.73899e+06	1	2646000	5	965	47	2
2777500	24	598313	Levels	6404	Timaru Ward	64	Timaru District	13	Canterbury Region	2.36681e+06	5.63496e+06	1	2777500	2	906	8	1
2645700	144	595400	Somerfield	6006	Spreydon-Heathcote Ward	60	Christchurch City	13	Canterbury Region	2.48006e+06	5.73926e+06	1	2645700	7	1005	50	2
2514400	204	590400	Belfast	6001	Shirley-Papanui Ward	60	Christchurch City	13	Canterbury Region	2.48034e+06	5.75117e+06	1	2514400	8	1046	92	3
2514602	102	590400	Belfast	6001	Shirley-Papanui Ward	60	Christchurch City	13	Canterbury Region	2.48007e+06	5.75099e+06	1	2514602	7	1005	36	2
417500	30	515500	Arch Hill	701	Western Bays Ward	7	Auckland City	02	Auckland Region	2.66665e+06	6.4808e+06	1	417500	6	979	10	2
1466709	15	548833	Te Mata Hills	3009	Poukawa Ward	30	Hastings District	06	Hawke's Bay Region	2.84515e+06	6.16275e+06	1	1466709	1	884	5	1
418200	72	515500	Arch Hill	701	Western Bays Ward	7	Auckland City	02	Auckland Region	2.66605e+06	6.48026e+06	1	418200	3	922	24	1
2121800	48	572900	Thorndon-Tinakori Road	4703	Lambton Ward	47	Wellington City	09	Wellington Region	2.6583e+06	5.9905e+06	1	2121800	4	943	17	2
417900	15	515500	Arch Hill	701	Western Bays Ward	7	Auckland City	02	Auckland Region	2.66648e+06	6.48055e+06	1	417900	6	979	5	2
418300	96	515500	Arch Hill	701	Western Bays Ward	7	Auckland City	02	Auckland Region	2.66618e+06	6.48035e+06	1	418300	3	922	32	1
1204100	6	536821	Omanu	2301	Mount Maunganui-Papamoa Ward	23	Tauranga City	04	Bay of Plenty Region	2.79293e+06	6.3881e+06	1	1204100	8	1035	3	3
289100	192	512100	Green Bay	604	New Lynn Ward	6	Waitakere City	02	Auckland Region	2.66078e+06	6.47326e+06	1	289100	6	986	67	2
420100	78	515600	Eden Terrace	704	Hobson Ward	7	Auckland City	02	Auckland Region	2.66678e+06	6.48049e+06	1	420100	9	1092	35	3
2780800	117	599000	Maori Park	6404	Timaru Ward	64	Timaru District	13	Canterbury Region	2.36992e+06	5.64492e+06	1	2780800	5	973	41	2
2780900	69	599000	Maori Park	6404	Timaru Ward	64	Timaru District	13	Canterbury Region	2.37013e+06	5.64489e+06	1	2780900	8	1056	31	3
290600	192	512100	Green Bay	604	New Lynn Ward	6	Waitakere City	02	Auckland Region	2.65954e+06	6.47285e+06	1	290600	3	920	63	1
421500	66	515201	Herne Bay	701	Western Bays Ward	7	Auckland City	02	Auckland Region	2.66443e+06	6.48255e+06	1	421500	1	886	22	1
1469100	33	545761	Irongate	3003	Heretaunga Ward	30	Hastings District	06	Hawke's Bay Region	2.83833e+06	6.16527e+06	1	1469100	4	943	12	2
1469301	3	545761	Irongate	3005	Hastings Ward	30	Hastings District	06	Hawke's Bay Region	2.83854e+06	6.16575e+06	1	1469301	3	921	1	1
1468902	36	545761	Irongate	3003	Heretaunga Ward	30	Hastings District	06	Hawke's Bay Region	2.83701e+06	6.16555e+06	1	1468902	4	938	13	2
1601200	114	552200	Welbourn	3301	New Plymouth City Ward	33	New Plymouth District	07	Taranaki Region	2.60425e+06	6.23666e+06	1	1601200	8	1044	51	3
289901	66	512100	Green Bay	604	New Lynn Ward	6	Waitakere City	02	Auckland Region	2.65964e+06	6.47342e+06	1	289901	6	993	23	2
2125300	3	573000	Lambton	4703	Lambton Ward	47	Wellington City	09	Wellington Region	2.65883e+06	5.99008e+06	1	2125300	8	1047	1	3
420200	162	515600	Eden Terrace	704	Hobson Ward	7	Auckland City	02	Auckland Region	2.66696e+06	6.48051e+06	1	420200	3	932	53	1
2124700	3	573000	Lambton	4703	Lambton Ward	47	Wellington City	09	Wellington Region	2.65864e+06	5.99009e+06	1	2124700	5	970	1	2
2124900	261	573000	Lambton	4703	Lambton Ward	47	Wellington City	09	Wellington Region	2.65843e+06	5.98995e+06	1	2124900	10	1144	117	3
1600700	69	552200	Welbourn	3301	New Plymouth City Ward	33	New Plymouth District	07	Taranaki Region	2.60415e+06	6.23749e+06	1	1600700	9	1089	31	3
419900	126	515600	Eden Terrace	704	Hobson Ward	7	Auckland City	02	Auckland Region	2.66673e+06	6.48035e+06	1	419900	6	987	44	2
2780100	60	599000	Maori Park	6404	Timaru Ward	64	Timaru District	13	Canterbury Region	2.37008e+06	5.64551e+06	1	2780100	4	946	21	2
419701	171	515600	Eden Terrace	704	Hobson Ward	7	Auckland City	02	Auckland Region	2.66694e+06	6.48004e+06	1	419701	7	1019	60	2
2647600	144	591500	Cathedral Square	6005	Hagley-Ferrymead Ward	60	Christchurch City	13	Canterbury Region	2.47934e+06	5.74086e+06	1	2647600	6	994	50	2
2647700	93	591500	Cathedral Square	6005	Hagley-Ferrymead Ward	60	Christchurch City	13	Canterbury Region	2.47952e+06	5.74087e+06	1	2647700	6	994	33	2
290000	204	512100	Green Bay	604	New Lynn Ward	6	Waitakere City	02	Auckland Region	2.65977e+06	6.47357e+06	1	290000	4	945	71	2
290400	147	512100	Green Bay	604	New Lynn Ward	6	Waitakere City	02	Auckland Region	2.6597e+06	6.47306e+06	1	290400	4	938	51	2
420700	30	515600	Eden Terrace	704	Hobson Ward	7	Auckland City	02	Auckland Region	2.66707e+06	6.48035e+06	1	420700	7	1006	10	2
1469000	99	545761	Irongate	3003	Heretaunga Ward	30	Hastings District	06	Hawke's Bay Region	2.83772e+06	6.16501e+06	1	1469000	4	943	35	2
681326	123	522722	Aberfeldy	806	Howick Ward	8	Manukau City	02	Auckland Region	2.6803e+06	6.47587e+06	1	681326	6	993	43	2
681600	213	522723	Elsmore Park	803	Pakuranga Ward	8	Manukau City	02	Auckland Region	2.67908e+06	6.47566e+06	1	681600	7	1014	75	2
419600	129	515600	Eden Terrace	704	Hobson Ward	7	Auckland City	02	Auckland Region	2.66665e+06	6.48027e+06	1	419600	5	956	45	2
418600	81	515500	Arch Hill	701	Western Bays Ward	7	Auckland City	02	Auckland Region	2.66631e+06	6.48039e+06	1	418600	4	951	28	2
681334	120	522722	Aberfeldy	806	Howick Ward	8	Manukau City	02	Auckland Region	2.68026e+06	6.47467e+06	1	681334	3	919	40	1
2123200	78	572900	Thorndon-Tinakori Road	4703	Lambton Ward	47	Wellington City	09	Wellington Region	2.65826e+06	5.99064e+06	1	2123200	5	967	27	2
2123900	237	573000	Lambton	4703	Lambton Ward	47	Wellington City	09	Wellington Region	2.6586e+06	5.99031e+06	1	2123900	10	1246	107	3
681311	225	522722	Aberfeldy	806	Howick Ward	8	Manukau City	02	Auckland Region	2.68093e+06	6.47601e+06	1	681311	4	953	79	2
2122900	99	572900	Thorndon-Tinakori Road	4703	Lambton Ward	47	Wellington City	09	Wellington Region	2.65852e+06	5.99095e+06	1	2122900	4	941	35	2
1599400	78	552100	Fitzroy	3301	New Plymouth City Ward	33	New Plymouth District	07	Taranaki Region	2.60558e+06	6.23902e+06	1	1599400	7	1023	27	2
1599500	51	552100	Fitzroy	3301	New Plymouth City Ward	33	New Plymouth District	07	Taranaki Region	2.60537e+06	6.23896e+06	1	1599500	5	955	18	2
681317	261	522722	Aberfeldy	806	Howick Ward	8	Manukau City	02	Auckland Region	2.68041e+06	6.47555e+06	1	681317	5	962	91	2
419000	78	515500	Arch Hill	701	Western Bays Ward	7	Auckland City	02	Auckland Region	2.66586e+06	6.48019e+06	1	419000	3	918	26	1
681318	156	522722	Aberfeldy	806	Howick Ward	8	Manukau City	02	Auckland Region	2.6806e+06	6.47555e+06	1	681318	3	925	51	1
681337	201	522722	Aberfeldy	806	Howick Ward	8	Manukau City	02	Auckland Region	2.68034e+06	6.4751e+06	1	681337	6	981	70	2
420000	84	515600	Eden Terrace	704	Hobson Ward	7	Auckland City	02	Auckland Region	2.66667e+06	6.48043e+06	1	420000	9	1092	38	3
681303	207	522722	Aberfeldy	806	Howick Ward	8	Manukau City	02	Auckland Region	2.68078e+06	6.47581e+06	1	681303	5	967	72	2
681202	267	522721	Pigeon Mountain South	803	Pakuranga Ward	8	Manukau City	02	Auckland Region	2.6791e+06	6.47589e+06	1	681202	5	965	93	2
2123400	81	572900	Thorndon-Tinakori Road	4703	Lambton Ward	47	Wellington City	09	Wellington Region	2.65814e+06	5.99055e+06	1	2123400	4	949	28	2
681700	198	522723	Elsmore Park	803	Pakuranga Ward	8	Manukau City	02	Auckland Region	2.6792e+06	6.47556e+06	1	681700	3	930	65	1
1599700	15	552100	Fitzroy	3301	New Plymouth City Ward	33	New Plymouth District	07	Taranaki Region	2.60561e+06	6.23877e+06	1	1599700	5	955	5	2
550300	189	518202	Mt Eden East	703	Eden-Albert Ward	7	Auckland City	02	Auckland Region	2.66705e+06	6.47837e+06	1	550300	4	947	66	2
551000	153	518202	Mt Eden East	703	Eden-Albert Ward	7	Auckland City	02	Auckland Region	2.66725e+06	6.47808e+06	1	551000	5	971	54	2
551100	210	518202	Mt Eden East	703	Eden-Albert Ward	7	Auckland City	02	Auckland Region	2.66703e+06	6.47796e+06	1	551100	2	916	69	1
1424400	57	546801	Hospital Hill	3199	Area Outside Ward	31	Napier City	06	Hawke's Bay Region	2.84605e+06	6.18292e+06	1	1424400	7	1002	20	2
2648000	3	591500	Cathedral Square	6005	Hagley-Ferrymead Ward	60	Christchurch City	13	Canterbury Region	2.47978e+06	5.74086e+06	1	2648000	9	1108	1	3
681309	324	522722	Aberfeldy	806	Howick Ward	8	Manukau City	02	Auckland Region	2.68067e+06	6.4762e+06	1	681309	8	1032	146	3
681400	108	522723	Elsmore Park	803	Pakuranga Ward	8	Manukau City	02	Auckland Region	2.67938e+06	6.47555e+06	1	681400	3	927	36	1
288600	90	512100	Green Bay	604	New Lynn Ward	6	Waitakere City	02	Auckland Region	2.66018e+06	6.47365e+06	1	288600	3	934	30	1
549802	81	518202	Mt Eden East	703	Eden-Albert Ward	7	Auckland City	02	Auckland Region	2.66733e+06	6.47849e+06	1	549802	2	916	27	1
681323	54	522722	Aberfeldy	806	Howick Ward	8	Manukau City	02	Auckland Region	2.68049e+06	6.47482e+06	1	681323	3	930	18	1
1468200	102	545762	Longlands South	3003	Heretaunga Ward	30	Hastings District	06	Hawke's Bay Region	2.83816e+06	6.16422e+06	1	1468200	5	961	36	2
419200	78	515500	Arch Hill	701	Western Bays Ward	7	Auckland City	02	Auckland Region	2.66594e+06	6.48021e+06	1	419200	5	954	27	2
681319	255	522722	Aberfeldy	806	Howick Ward	8	Manukau City	02	Auckland Region	2.68036e+06	6.47575e+06	1	681319	5	963	89	2
681331	57	522722	Aberfeldy	806	Howick Ward	8	Manukau City	02	Auckland Region	2.68016e+06	6.47494e+06	1	681331	3	930	19	1
2517200	144	589000	Wairarapa	6002	Fendalton-Waimairi Ward	60	Christchurch City	13	Canterbury Region	2.47599e+06	5.74478e+06	1	2517200	9	1123	65	3
812900	123	521122	Kingseat	1002	Northern Ward	10	Franklin District	02	Auckland Region	2.67825e+06	6.44841e+06	1	812900	4	949	43	2
1598501	87	552100	Fitzroy	3301	New Plymouth City Ward	33	New Plymouth District	07	Taranaki Region	2.60543e+06	6.23836e+06	1	1598501	4	944	30	2
681312	135	522722	Aberfeldy	806	Howick Ward	8	Manukau City	02	Auckland Region	2.68108e+06	6.47592e+06	1	681312	3	927	45	1
288800	105	512100	Green Bay	604	New Lynn Ward	6	Waitakere City	02	Auckland Region	2.66014e+06	6.47313e+06	1	288800	5	963	37	2
550600	120	518202	Mt Eden East	703	Eden-Albert Ward	7	Auckland City	02	Auckland Region	2.66712e+06	6.47821e+06	1	550600	5	955	42	2
550500	129	518202	Mt Eden East	703	Eden-Albert Ward	7	Auckland City	02	Auckland Region	2.66753e+06	6.47823e+06	1	550500	1	893	43	1
682100	174	522723	Elsmore Park	803	Pakuranga Ward	8	Manukau City	02	Auckland Region	2.67921e+06	6.47517e+06	1	682100	5	961	61	2
288402	66	512100	Green Bay	604	New Lynn Ward	6	Waitakere City	02	Auckland Region	2.66004e+06	6.4735e+06	1	288402	6	978	23	2
812001	48	521121	Patumahoe	1002	Northern Ward	10	Franklin District	02	Auckland Region	2.67443e+06	6.44275e+06	1	812001	4	941	17	2
550100	165	518202	Mt Eden East	703	Eden-Albert Ward	7	Auckland City	02	Auckland Region	2.66727e+06	6.47841e+06	1	550100	5	964	58	2
2123700	66	573000	Lambton	4703	Lambton Ward	47	Wellington City	09	Wellington Region	2.65874e+06	5.99042e+06	1	2123700	5	970	23	2
2123600	69	572900	Thorndon-Tinakori Road	4703	Lambton Ward	47	Wellington City	09	Wellington Region	2.65803e+06	5.99045e+06	1	2123600	4	949	24	2
1598300	93	552100	Fitzroy	3301	New Plymouth City Ward	33	New Plymouth District	07	Taranaki Region	2.60534e+06	6.23832e+06	1	1598300	6	984	33	2
2910300	51	604221	Corstorphine West	7106	South Dunedin Ward	71	Dunedin City	14	Otago Region	2.31311e+06	5.47588e+06	1	2910300	9	1102	23	3
418900	69	515500	Arch Hill	701	Western Bays Ward	7	Auckland City	02	Auckland Region	2.66582e+06	6.48015e+06	1	418900	9	1080	31	3
1468300	96	545762	Longlands South	3003	Heretaunga Ward	30	Hastings District	06	Hawke's Bay Region	2.84163e+06	6.16383e+06	1	1468300	1	886	32	1
681321	120	522722	Aberfeldy	806	Howick Ward	8	Manukau City	02	Auckland Region	2.68012e+06	6.47559e+06	1	681321	5	965	42	2
681900	186	522723	Elsmore Park	803	Pakuranga Ward	8	Manukau City	02	Auckland Region	2.67907e+06	6.47542e+06	1	681900	7	1013	65	2
549801	54	518202	Mt Eden East	703	Eden-Albert Ward	7	Auckland City	02	Auckland Region	2.66719e+06	6.47862e+06	1	549801	2	916	18	1
2910400	36	604221	Corstorphine West	7106	South Dunedin Ward	71	Dunedin City	14	Otago Region	2.31308e+06	5.47582e+06	1	2910400	9	1102	16	3
550900	126	518202	Mt Eden East	703	Eden-Albert Ward	7	Auckland City	02	Auckland Region	2.66703e+06	6.47815e+06	1	550900	2	917	42	1
681325	147	522722	Aberfeldy	806	Howick Ward	8	Manukau City	02	Auckland Region	2.6804e+06	6.47606e+06	1	681325	7	1024	51	2
681335	108	522722	Aberfeldy	806	Howick Ward	8	Manukau City	02	Auckland Region	2.68014e+06	6.47519e+06	1	681335	4	940	38	2
682000	114	522723	Elsmore Park	803	Pakuranga Ward	8	Manukau City	02	Auckland Region	2.67911e+06	6.47513e+06	1	682000	4	941	40	2
812400	108	521121	Patumahoe	1001	Waiuku-Awhitu Ward	10	Franklin District	02	Auckland Region	2.67068e+06	6.4416e+06	1	812400	1	892	36	1
681333	75	522722	Aberfeldy	806	Howick Ward	8	Manukau City	02	Auckland Region	2.68031e+06	6.47498e+06	1	681333	5	967	26	2
2516200	204	589100	Jellie Park	6002	Fendalton-Waimairi Ward	60	Christchurch City	13	Canterbury Region	2.4764e+06	5.74484e+06	1	2516200	10	1157	92	3
812800	30	521122	Kingseat	1002	Northern Ward	10	Franklin District	02	Auckland Region	2.6778e+06	6.44983e+06	1	812800	1	898	10	1
2517100	162	589000	Wairarapa	6002	Fendalton-Waimairi Ward	60	Christchurch City	13	Canterbury Region	2.47635e+06	5.74503e+06	1	2517100	5	967	57	2
2516800	147	589000	Wairarapa	6002	Fendalton-Waimairi Ward	60	Christchurch City	13	Canterbury Region	2.47607e+06	5.74513e+06	1	2516800	2	907	49	1
2123000	105	572900	Thorndon-Tinakori Road	4703	Lambton Ward	47	Wellington City	09	Wellington Region	2.65847e+06	5.99089e+06	1	2123000	3	926	35	1
1599600	171	552100	Fitzroy	3301	New Plymouth City Ward	33	New Plymouth District	07	Taranaki Region	2.60541e+06	6.2388e+06	1	1599600	10	1216	77	3
419800	60	515600	Eden Terrace	704	Hobson Ward	7	Auckland City	02	Auckland Region	2.66687e+06	6.48018e+06	1	419800	6	987	21	2
681330	225	522722	Aberfeldy	806	Howick Ward	8	Manukau City	02	Auckland Region	2.68058e+06	6.47575e+06	1	681330	5	962	79	2
681336	45	522722	Aberfeldy	806	Howick Ward	8	Manukau City	02	Auckland Region	2.68021e+06	6.47525e+06	1	681336	4	940	16	2
418700	114	515500	Arch Hill	701	Western Bays Ward	7	Auckland City	02	Auckland Region	2.66638e+06	6.48046e+06	1	418700	4	951	40	2
418800	87	515500	Arch Hill	701	Western Bays Ward	7	Auckland City	02	Auckland Region	2.66564e+06	6.48018e+06	1	418800	9	1080	39	3
550700	105	518202	Mt Eden East	703	Eden-Albert Ward	7	Auckland City	02	Auckland Region	2.66749e+06	6.4781e+06	1	550700	1	881	35	1
288500	75	512100	Green Bay	604	New Lynn Ward	6	Waitakere City	02	Auckland Region	2.66013e+06	6.47357e+06	1	288500	6	978	26	2
681327	231	522722	Aberfeldy	806	Howick Ward	8	Manukau City	02	Auckland Region	2.68048e+06	6.47522e+06	1	681327	4	936	81	2
288900	132	512100	Green Bay	604	New Lynn Ward	6	Waitakere City	02	Auckland Region	2.6604e+06	6.47323e+06	1	288900	4	953	46	2
1468500	120	545762	Longlands South	3003	Heretaunga Ward	30	Hastings District	06	Hawke's Bay Region	2.84073e+06	6.16483e+06	1	1468500	4	939	42	2
812100	90	521121	Patumahoe	1002	Northern Ward	10	Franklin District	02	Auckland Region	2.67463e+06	6.44164e+06	1	812100	4	941	31	2
2517000	99	589000	Wairarapa	6002	Fendalton-Waimairi Ward	60	Christchurch City	13	Canterbury Region	2.47628e+06	5.74509e+06	1	2517000	3	929	33	1
2123300	87	572900	Thorndon-Tinakori Road	4703	Lambton Ward	47	Wellington City	09	Wellington Region	2.6582e+06	5.99057e+06	1	2123300	5	967	30	2
419500	147	515600	Eden Terrace	703	Eden-Albert Ward	7	Auckland City	02	Auckland Region	2.6666e+06	6.48021e+06	1	419500	7	1007	51	2
813001	81	521122	Kingseat	1002	Northern Ward	10	Franklin District	02	Auckland Region	2.67784e+06	6.44863e+06	1	813001	6	978	28	2
1598401	30	552100	Fitzroy	3301	New Plymouth City Ward	33	New Plymouth District	07	Taranaki Region	2.6055e+06	6.23851e+06	1	1598401	4	944	10	2
550000	99	518202	Mt Eden East	703	Eden-Albert Ward	7	Auckland City	02	Auckland Region	2.66756e+06	6.47857e+06	1	550000	6	984	35	2
419100	18	515500	Arch Hill	701	Western Bays Ward	7	Auckland City	02	Auckland Region	2.66592e+06	6.48006e+06	1	419100	3	918	6	1
550800	114	518202	Mt Eden East	703	Eden-Albert Ward	7	Auckland City	02	Auckland Region	2.66756e+06	6.47796e+06	1	550800	5	954	40	2
681310	147	522722	Aberfeldy	806	Howick Ward	8	Manukau City	02	Auckland Region	2.68093e+06	6.47618e+06	1	681310	8	1033	66	3
2648200	3	591500	Cathedral Square	6005	Hagley-Ferrymead Ward	60	Christchurch City	13	Canterbury Region	2.48004e+06	5.74132e+06	1	2648200	9	1108	1	3
288700	72	512100	Green Bay	604	New Lynn Ward	6	Waitakere City	02	Auckland Region	2.66011e+06	6.47334e+06	1	288700	3	934	24	1
2516500	105	589100	Jellie Park	6002	Fendalton-Waimairi Ward	60	Christchurch City	13	Canterbury Region	2.47572e+06	5.74398e+06	1	2516500	4	951	37	2
2123500	99	572900	Thorndon-Tinakori Road	4703	Lambton Ward	47	Wellington City	09	Wellington Region	2.65809e+06	5.99046e+06	1	2123500	4	936	35	2
681500	243	522723	Elsmore Park	803	Pakuranga Ward	8	Manukau City	02	Auckland Region	2.67978e+06	6.47491e+06	1	681500	5	954	85	2
549900	81	518202	Mt Eden East	703	Eden-Albert Ward	7	Auckland City	02	Auckland Region	2.66738e+06	6.47858e+06	1	549900	4	937	28	2
550200	150	518202	Mt Eden East	703	Eden-Albert Ward	7	Auckland City	02	Auckland Region	2.66755e+06	6.47843e+06	1	550200	2	910	50	1
2781700	96	598800	Waimataitai	6404	Timaru Ward	64	Timaru District	13	Canterbury Region	2.36982e+06	5.64593e+06	1	2781700	5	968	34	2
423100	72	515201	Herne Bay	701	Western Bays Ward	7	Auckland City	02	Auckland Region	2.66515e+06	6.48267e+06	1	423100	2	900	24	1
2126400	333	573000	Lambton	4703	Lambton Ward	47	Wellington City	09	Wellington Region	2.65856e+06	5.98981e+06	1	2126400	7	1012	117	2
1470313	126	548611	Kingsley-Chatham	3006	Flaxmere Ward	30	Hastings District	06	Hawke's Bay Region	2.8339e+06	6.16947e+06	1	1470313	10	1196	57	3
1471800	111	545721	Karamu	3003	Heretaunga Ward	30	Hastings District	06	Hawke's Bay Region	2.84268e+06	6.16853e+06	1	1471800	7	1023	39	2
1470314	195	548611	Kingsley-Chatham	3006	Flaxmere Ward	30	Hastings District	06	Hawke's Bay Region	2.83375e+06	6.16967e+06	1	1470314	10	1302	88	3
1471900	12	545721	Karamu	3003	Heretaunga Ward	30	Hastings District	06	Hawke's Bay Region	2.84302e+06	6.16934e+06	1	1471900	4	941	4	2
685300	105	522910	Pakuranga Central	803	Pakuranga Ward	8	Manukau City	02	Auckland Region	2.67786e+06	6.4748e+06	1	685300	3	924	35	1
685500	69	522910	Pakuranga Central	803	Pakuranga Ward	8	Manukau City	02	Auckland Region	2.6782e+06	6.47519e+06	1	685500	4	952	24	2
290702	156	512100	Green Bay	604	New Lynn Ward	6	Waitakere City	02	Auckland Region	2.65925e+06	6.47289e+06	1	290702	3	928	51	1
684800	123	522920	Edgewater	803	Pakuranga Ward	8	Manukau City	02	Auckland Region	2.67715e+06	6.4744e+06	1	684800	7	1008	43	2
1468903	18	545842	Bridge Pa	3003	Heretaunga Ward	30	Hastings District	06	Hawke's Bay Region	2.83617e+06	6.1657e+06	1	1468903	4	938	6	2
1470205	6	545842	Bridge Pa	3003	Heretaunga Ward	30	Hastings District	06	Hawke's Bay Region	2.83606e+06	6.16591e+06	1	1470205	4	937	2	2
2517900	144	589000	Wairarapa	6002	Fendalton-Waimairi Ward	60	Christchurch City	13	Canterbury Region	2.47538e+06	5.74411e+06	1	2517900	3	929	48	1
2126700	147	573000	Lambton	4703	Lambton Ward	47	Wellington City	09	Wellington Region	2.65848e+06	5.98961e+06	1	2126700	6	978	51	2
2126500	162	573000	Lambton	4703	Lambton Ward	47	Wellington City	09	Wellington Region	2.65858e+06	5.98974e+06	1	2126500	9	1121	73	3
1601300	66	552200	Welbourn	3301	New Plymouth City Ward	33	New Plymouth District	07	Taranaki Region	2.60435e+06	6.23661e+06	1	1601300	9	1089	30	3
1601800	144	552200	Welbourn	3301	New Plymouth City Ward	33	New Plymouth District	07	Taranaki Region	2.60474e+06	6.23646e+06	1	1601800	7	1008	50	2
1601700	162	552200	Welbourn	3301	New Plymouth City Ward	33	New Plymouth District	07	Taranaki Region	2.60453e+06	6.23658e+06	1	1601700	7	1007	57	2
813800	183	521111	Paerata-Cape Hill	1002	Northern Ward	10	Franklin District	02	Auckland Region	2.67869e+06	6.44614e+06	1	813800	4	937	64	2
422500	135	515201	Herne Bay	701	Western Bays Ward	7	Auckland City	02	Auckland Region	2.66485e+06	6.48249e+06	1	422500	3	934	45	1
683500	207	522920	Edgewater	803	Pakuranga Ward	8	Manukau City	02	Auckland Region	2.67678e+06	6.47472e+06	1	683500	7	1001	72	2
1470305	180	548611	Kingsley-Chatham	3006	Flaxmere Ward	30	Hastings District	06	Hawke's Bay Region	2.83409e+06	6.16936e+06	1	1470305	9	1133	81	3
2124800	237	573000	Lambton	4703	Lambton Ward	47	Wellington City	09	Wellington Region	2.65858e+06	5.98998e+06	1	2124800	9	1126	107	3
1470317	96	548611	Kingsley-Chatham	3006	Flaxmere Ward	30	Hastings District	06	Hawke's Bay Region	2.83414e+06	6.16952e+06	1	1470317	10	1196	43	3
2125600	33	573000	Lambton	4703	Lambton Ward	47	Wellington City	09	Wellington Region	2.65879e+06	5.99002e+06	1	2125600	8	1047	15	3
1470500	36	545710	Twyford	3003	Heretaunga Ward	30	Hastings District	06	Hawke's Bay Region	2.83375e+06	6.17172e+06	1	1470500	7	1014	13	2
1601400	138	552200	Welbourn	3301	New Plymouth City Ward	33	New Plymouth District	07	Taranaki Region	2.6044e+06	6.2369e+06	1	1601400	2	918	46	1
1601000	93	552200	Welbourn	3301	New Plymouth City Ward	33	New Plymouth District	07	Taranaki Region	2.60431e+06	6.23697e+06	1	1601000	2	904	31	1
421100	9	515600	Eden Terrace	704	Hobson Ward	7	Auckland City	02	Auckland Region	2.66727e+06	6.48013e+06	1	421100	7	1029	3	2
421000	84	515600	Eden Terrace	704	Hobson Ward	7	Auckland City	02	Auckland Region	2.66718e+06	6.48019e+06	1	421000	7	1006	29	2
421700	117	515201	Herne Bay	701	Western Bays Ward	7	Auckland City	02	Auckland Region	2.66425e+06	6.48224e+06	1	421700	1	886	39	1
2517500	126	589000	Wairarapa	6002	Fendalton-Waimairi Ward	60	Christchurch City	13	Canterbury Region	2.47589e+06	5.74487e+06	1	2517500	9	1090	57	3
1600500	60	552100	Fitzroy	3301	New Plymouth City Ward	33	New Plymouth District	07	Taranaki Region	2.60584e+06	6.23896e+06	1	1600500	6	988	21	2
2780300	150	599000	Maori Park	6404	Timaru Ward	64	Timaru District	13	Canterbury Region	2.36958e+06	5.6452e+06	1	2780300	6	982	52	2
683800	96	522920	Edgewater	803	Pakuranga Ward	8	Manukau City	02	Auckland Region	2.67701e+06	6.47444e+06	1	683800	8	1058	43	3
1469200	156	547900	Raureka	3005	Hastings Ward	30	Hastings District	06	Hawke's Bay Region	2.83827e+06	6.16591e+06	1	1469200	7	1008	55	2
551402	18	518202	Mt Eden East	703	Eden-Albert Ward	7	Auckland City	02	Auckland Region	2.66753e+06	6.47783e+06	1	551402	4	945	6	2
2517700	141	589000	Wairarapa	6002	Fendalton-Waimairi Ward	60	Christchurch City	13	Canterbury Region	2.47531e+06	5.7443e+06	1	2517700	3	933	47	1
551300	81	518202	Mt Eden East	703	Eden-Albert Ward	7	Auckland City	02	Auckland Region	2.66745e+06	6.47793e+06	1	551300	4	945	28	2
2780500	144	599000	Maori Park	6404	Timaru Ward	64	Timaru District	13	Canterbury Region	2.37005e+06	5.64517e+06	1	2780500	8	1071	65	3
2781000	117	598800	Waimataitai	6404	Timaru Ward	64	Timaru District	13	Canterbury Region	2.36975e+06	5.64657e+06	1	2781000	7	1015	41	2
290200	171	512100	Green Bay	604	New Lynn Ward	6	Waitakere City	02	Auckland Region	2.65991e+06	6.47349e+06	1	290200	4	940	60	2
1468901	27	545761	Irongate	3003	Heretaunga Ward	30	Hastings District	06	Hawke's Bay Region	2.83643e+06	6.16447e+06	1	1468901	4	938	9	2
1469600	147	545852	Pakipaki	3009	Poukawa Ward	30	Hastings District	06	Hawke's Bay Region	2.83544e+06	6.1628e+06	1	1469600	5	966	51	2
290500	135	512100	Green Bay	604	New Lynn Ward	6	Waitakere City	02	Auckland Region	2.65983e+06	6.47296e+06	1	290500	2	907	45	1
290300	60	512100	Green Bay	604	New Lynn Ward	6	Waitakere City	02	Auckland Region	2.65993e+06	6.47315e+06	1	290300	4	938	21	2
289902	39	512100	Green Bay	604	New Lynn Ward	6	Waitakere City	02	Auckland Region	2.65956e+06	6.47331e+06	1	289902	6	993	14	2
1469303	135	547900	Raureka	3005	Hastings Ward	30	Hastings District	06	Hawke's Bay Region	2.83811e+06	6.16583e+06	1	1469303	3	921	45	1
1469902	99	547900	Raureka	3005	Hastings Ward	30	Hastings District	06	Hawke's Bay Region	2.83783e+06	6.16732e+06	1	1469902	1	889	33	1
1469903	48	545761	Irongate	3003	Heretaunga Ward	30	Hastings District	06	Hawke's Bay Region	2.83689e+06	6.16767e+06	1	1469903	4	951	17	2
2125000	12	573000	Lambton	4703	Lambton Ward	47	Wellington City	09	Wellington Region	2.65889e+06	5.99023e+06	1	2125000	8	1047	5	3
2124500	123	573000	Lambton	4703	Lambton Ward	47	Wellington City	09	Wellington Region	2.65844e+06	5.99019e+06	1	2124500	5	970	43	2
1601100	3	552200	Welbourn	3301	New Plymouth City Ward	33	New Plymouth District	07	Taranaki Region	2.60394e+06	6.23721e+06	1	1601100	9	1089	1	3
2517300	141	589000	Wairarapa	6002	Fendalton-Waimairi Ward	60	Christchurch City	13	Canterbury Region	2.47614e+06	5.74477e+06	1	2517300	4	941	49	2
441504	3	514301	Grafton West	704	Hobson Ward	7	Auckland City	02	Auckland Region	2.66759e+06	6.48052e+06	1	441504	8	1066	1	3
682700	150	522723	Elsmore Park	803	Pakuranga Ward	8	Manukau City	02	Auckland Region	2.67928e+06	6.47465e+06	1	682700	4	938	52	2
2911700	90	604210	Caversham	7106	South Dunedin Ward	71	Dunedin City	14	Otago Region	2.3133e+06	5.47601e+06	1	2911700	9	1077	40	3
551500	162	518202	Mt Eden East	703	Eden-Albert Ward	7	Auckland City	02	Auckland Region	2.66706e+06	6.47782e+06	1	551500	3	922	53	1
421600	102	515201	Herne Bay	701	Western Bays Ward	7	Auckland City	02	Auckland Region	2.66441e+06	6.48232e+06	1	421600	1	886	34	1
420900	36	515600	Eden Terrace	704	Hobson Ward	7	Auckland City	02	Auckland Region	2.66695e+06	6.48026e+06	1	420900	7	1006	13	2
2517800	114	589000	Wairarapa	6002	Fendalton-Waimairi Ward	60	Christchurch City	13	Canterbury Region	2.47556e+06	5.74416e+06	1	2517800	3	929	38	1
289800	147	512100	Green Bay	604	New Lynn Ward	6	Waitakere City	02	Auckland Region	2.65947e+06	6.47326e+06	1	289800	6	998	51	2
420600	33	515600	Eden Terrace	704	Hobson Ward	7	Auckland City	02	Auckland Region	2.66735e+06	6.48042e+06	1	420600	7	1029	12	2
1600800	33	552200	Welbourn	3301	New Plymouth City Ward	33	New Plymouth District	07	Taranaki Region	2.60417e+06	6.2374e+06	1	1600800	9	1089	15	3
813601	84	521111	Paerata-Cape Hill	1002	Northern Ward	10	Franklin District	02	Auckland Region	2.67845e+06	6.44702e+06	1	813601	5	970	29	2
2517400	135	589000	Wairarapa	6002	Fendalton-Waimairi Ward	60	Christchurch City	13	Canterbury Region	2.47584e+06	5.74497e+06	1	2517400	9	1097	61	3
551700	192	518202	Mt Eden East	703	Eden-Albert Ward	7	Auckland City	02	Auckland Region	2.66742e+06	6.47767e+06	1	551700	3	931	63	1
2911000	81	604210	Caversham	7106	South Dunedin Ward	71	Dunedin City	14	Otago Region	2.31333e+06	5.47588e+06	1	2911000	4	949	28	2
683400	132	522920	Edgewater	803	Pakuranga Ward	8	Manukau City	02	Auckland Region	2.67674e+06	6.47487e+06	1	683400	7	1019	46	2
289700	93	512100	Green Bay	604	New Lynn Ward	6	Waitakere City	02	Auckland Region	2.65943e+06	6.47346e+06	1	289700	2	908	31	1
420300	39	515600	Eden Terrace	704	Hobson Ward	7	Auckland City	02	Auckland Region	2.66704e+06	6.48055e+06	1	420300	7	1030	14	2
682302	33	522723	Elsmore Park	803	Pakuranga Ward	8	Manukau City	02	Auckland Region	2.67941e+06	6.47519e+06	1	682302	5	967	12	2
421200	78	515600	Eden Terrace	704	Hobson Ward	7	Auckland City	02	Auckland Region	2.66737e+06	6.48022e+06	1	421200	7	1029	27	2
1469302	57	547900	Raureka	3005	Hastings Ward	30	Hastings District	06	Hawke's Bay Region	2.83867e+06	6.16563e+06	1	1469302	3	921	19	1
1470102	39	545761	Irongate	3003	Heretaunga Ward	30	Hastings District	06	Hawke's Bay Region	2.8368e+06	6.16707e+06	1	1470102	4	942	14	2
683000	213	522920	Edgewater	803	Pakuranga Ward	8	Manukau City	02	Auckland Region	2.67618e+06	6.47507e+06	1	683000	6	983	75	2
2517600	300	589000	Wairarapa	6002	Fendalton-Waimairi Ward	60	Christchurch City	13	Canterbury Region	2.47569e+06	5.7446e+06	1	2517600	6	983	105	2
2124400	9	573000	Lambton	4703	Lambton Ward	47	Wellington City	09	Wellington Region	2.65868e+06	5.99001e+06	1	2124400	5	970	3	2
683300	264	522920	Edgewater	803	Pakuranga Ward	8	Manukau City	02	Auckland Region	2.67647e+06	6.47489e+06	1	683300	7	1027	92	2
682600	159	522723	Elsmore Park	803	Pakuranga Ward	8	Manukau City	02	Auckland Region	2.67957e+06	6.47497e+06	1	682600	5	954	56	2
289000	150	512100	Green Bay	604	New Lynn Ward	6	Waitakere City	02	Auckland Region	2.66059e+06	6.47324e+06	1	289000	8	1036	68	3
2911200	96	604210	Caversham	7106	South Dunedin Ward	71	Dunedin City	14	Otago Region	2.31383e+06	5.47581e+06	1	2911200	4	949	34	2
551401	69	518202	Mt Eden East	703	Eden-Albert Ward	7	Auckland City	02	Auckland Region	2.66744e+06	6.4778e+06	1	551401	4	945	24	2
682301	201	522723	Elsmore Park	803	Pakuranga Ward	8	Manukau City	02	Auckland Region	2.67942e+06	6.4753e+06	1	682301	5	967	70	2
420800	390	515600	Eden Terrace	704	Hobson Ward	7	Auckland City	02	Auckland Region	2.66699e+06	6.48035e+06	1	420800	6	986	136	2
2649800	9	591500	Cathedral Square	6005	Hagley-Ferrymead Ward	60	Christchurch City	13	Canterbury Region	2.481e+06	5.7409e+06	1	2649800	9	1108	4	3
1469400	183	548300	Akina	3005	Hastings Ward	30	Hastings District	06	Hawke's Bay Region	2.83887e+06	6.16533e+06	1	1469400	6	977	64	2
1470211	36	545842	Bridge Pa	3007	Maraekakaho Ward	30	Hastings District	06	Hawke's Bay Region	2.83259e+06	6.16607e+06	1	1470211	4	937	13	2
2125500	21	573000	Lambton	4703	Lambton Ward	47	Wellington City	09	Wellington Region	2.65887e+06	5.98998e+06	1	2125500	8	1047	9	3
2124300	129	573000	Lambton	4703	Lambton Ward	47	Wellington City	09	Wellington Region	2.65899e+06	5.99e+06	1	2124300	4	943	45	2
1599800	60	552100	Fitzroy	3301	New Plymouth City Ward	33	New Plymouth District	07	Taranaki Region	2.60561e+06	6.23892e+06	1	1599800	7	1023	21	2
2910500	57	604221	Corstorphine West	7106	South Dunedin Ward	71	Dunedin City	14	Otago Region	2.31303e+06	5.47572e+06	1	2910500	9	1102	26	3
2911900	81	604210	Caversham	7106	South Dunedin Ward	71	Dunedin City	14	Otago Region	2.31381e+06	5.47601e+06	1	2911900	9	1077	36	3
682800	213	522723	Elsmore Park	803	Pakuranga Ward	8	Manukau City	02	Auckland Region	2.6795e+06	6.47474e+06	1	682800	4	950	75	2
1468800	120	545761	Irongate	3003	Heretaunga Ward	30	Hastings District	06	Hawke's Bay Region	2.83782e+06	6.16626e+06	1	1468800	4	938	42	2
1469802	51	547900	Raureka	3005	Hastings Ward	30	Hastings District	06	Hawke's Bay Region	2.83808e+06	6.16745e+06	1	1469802	6	990	18	2
682200	126	522723	Elsmore Park	803	Pakuranga Ward	8	Manukau City	02	Auckland Region	2.67929e+06	6.4753e+06	1	682200	4	952	44	2
421400	96	515201	Herne Bay	701	Western Bays Ward	7	Auckland City	02	Auckland Region	2.66423e+06	6.48241e+06	1	421400	1	886	32	1
2124000	6	573000	Lambton	4703	Lambton Ward	47	Wellington City	09	Wellington Region	2.65871e+06	5.99022e+06	1	2124000	5	970	2	2
2911800	117	604210	Caversham	7106	South Dunedin Ward	71	Dunedin City	14	Otago Region	2.31359e+06	5.47606e+06	1	2911800	8	1049	53	3
682900	198	522723	Elsmore Park	803	Pakuranga Ward	8	Manukau City	02	Auckland Region	2.67962e+06	6.47454e+06	1	682900	7	1004	69	2
420500	207	515600	Eden Terrace	704	Hobson Ward	7	Auckland City	02	Auckland Region	2.66725e+06	6.48038e+06	1	420500	4	944	72	2
2780700	171	599000	Maori Park	6404	Timaru Ward	64	Timaru District	13	Canterbury Region	2.36968e+06	5.64498e+06	1	2780700	4	938	60	2
2780600	120	599000	Maori Park	6404	Timaru Ward	64	Timaru District	13	Canterbury Region	2.36999e+06	5.64507e+06	1	2780600	7	999	42	2
551600	198	518202	Mt Eden East	703	Eden-Albert Ward	7	Auckland City	02	Auckland Region	2.66701e+06	6.47772e+06	1	551600	7	1020	69	2
682400	198	522723	Elsmore Park	803	Pakuranga Ward	8	Manukau City	02	Auckland Region	2.67929e+06	6.4749e+06	1	682400	5	966	69	2
290100	117	512100	Green Bay	604	New Lynn Ward	6	Waitakere City	02	Auckland Region	2.65982e+06	6.47322e+06	1	290100	8	1033	53	3
420400	96	515600	Eden Terrace	704	Hobson Ward	7	Auckland City	02	Auckland Region	2.66712e+06	6.48049e+06	1	420400	7	1030	34	2
289500	96	512100	Green Bay	604	New Lynn Ward	6	Waitakere City	02	Auckland Region	2.65929e+06	6.47347e+06	1	289500	2	908	32	1
70204	330	503400	Maunu	205	Okara Ward	2	Whangarei District	01	Northland Region	2.62631e+06	6.60597e+06	1	70204	1	892	109	1
551200	123	518202	Mt Eden East	703	Eden-Albert Ward	7	Auckland City	02	Auckland Region	2.66725e+06	6.4779e+06	1	551200	5	971	43	2
682500	180	522723	Elsmore Park	803	Pakuranga Ward	8	Manukau City	02	Auckland Region	2.67941e+06	6.47501e+06	1	682500	6	976	63	2
1600900	177	552200	Welbourn	3301	New Plymouth City Ward	33	New Plymouth District	07	Taranaki Region	2.60433e+06	6.23727e+06	1	1600900	5	959	62	2
1600600	33	552200	Welbourn	3301	New Plymouth City Ward	33	New Plymouth District	07	Taranaki Region	2.60406e+06	6.23761e+06	1	1600600	9	1089	15	3
2911100	132	604210	Caversham	7106	South Dunedin Ward	71	Dunedin City	14	Otago Region	2.31355e+06	5.47585e+06	1	2911100	9	1086	59	3
2912000	78	604210	Caversham	7106	South Dunedin Ward	71	Dunedin City	14	Otago Region	2.31389e+06	5.47593e+06	1	2912000	7	1006	27	2
294102	96	511901	Kaurilands	604	New Lynn Ward	6	Waitakere City	02	Auckland Region	2.65819e+06	6.4731e+06	1	294102	1	898	32	1
554800	171	518302	Mt Eden South	703	Eden-Albert Ward	7	Auckland City	02	Auckland Region	2.66577e+06	6.47706e+06	1	554800	7	1003	60	2
424600	63	515202	St Marys	701	Western Bays Ward	7	Auckland City	02	Auckland Region	2.66587e+06	6.48292e+06	1	424600	4	951	22	2
2128500	15	573000	Lambton	4703	Lambton Ward	47	Wellington City	09	Wellington Region	2.65857e+06	5.98926e+06	1	2128500	8	1068	7	3
818500	42	525910	Pukekohe North	1003	Pukekohe Ward	10	Franklin District	02	Auckland Region	2.67921e+06	6.44302e+06	1	818500	10	1150	19	3
818000	141	525910	Pukekohe North	1003	Pukekohe Ward	10	Franklin District	02	Auckland Region	2.67904e+06	6.44422e+06	1	818000	6	989	49	2
817500	153	525910	Pukekohe North	1003	Pukekohe Ward	10	Franklin District	02	Auckland Region	2.67889e+06	6.4441e+06	1	817500	8	1050	69	3
2521500	141	588700	Bishopdale	6002	Fendalton-Waimairi Ward	60	Christchurch City	13	Canterbury Region	2.47665e+06	5.74567e+06	1	2521500	3	931	47	1
2915500	105	604210	Caversham	7106	South Dunedin Ward	71	Dunedin City	14	Otago Region	2.31439e+06	5.47613e+06	1	2915500	8	1067	47	3
685900	51	522910	Pakuranga Central	803	Pakuranga Ward	8	Manukau City	02	Auckland Region	2.67748e+06	6.47475e+06	1	685900	5	955	18	2
293100	162	511902	Crum Park	604	New Lynn Ward	6	Waitakere City	02	Auckland Region	2.65879e+06	6.47313e+06	1	293100	3	920	53	1
686100	171	522910	Pakuranga Central	803	Pakuranga Ward	8	Manukau City	02	Auckland Region	2.67762e+06	6.47428e+06	1	686100	5	954	60	2
2128600	42	573000	Lambton	4703	Lambton Ward	47	Wellington City	09	Wellington Region	2.65844e+06	5.98924e+06	1	2128600	8	1068	19	3
2127700	57	573000	Lambton	4703	Lambton Ward	47	Wellington City	09	Wellington Region	2.65864e+06	5.98951e+06	1	2127700	9	1073	26	3
1472300	78	545721	Karamu	3003	Heretaunga Ward	30	Hastings District	06	Hawke's Bay Region	2.84222e+06	6.16778e+06	1	1472300	8	1041	35	3
817800	285	525910	Pukekohe North	1003	Pukekohe Ward	10	Franklin District	02	Auckland Region	2.6791e+06	6.44394e+06	1	817800	8	1040	128	3
684000	81	522910	Pakuranga Central	803	Pakuranga Ward	8	Manukau City	02	Auckland Region	2.67722e+06	6.47479e+06	1	684000	9	1112	36	3
422200	24	515201	Herne Bay	701	Western Bays Ward	7	Auckland City	02	Auckland Region	2.66481e+06	6.48294e+06	1	422200	3	926	8	1
554600	93	518302	Mt Eden South	703	Eden-Albert Ward	7	Auckland City	02	Auckland Region	2.66581e+06	6.47718e+06	1	554600	7	1001	33	2
291700	102	511902	Crum Park	604	New Lynn Ward	6	Waitakere City	02	Auckland Region	2.65899e+06	6.47327e+06	1	291700	4	942	36	2
422400	54	515201	Herne Bay	701	Western Bays Ward	7	Auckland City	02	Auckland Region	2.66478e+06	6.48268e+06	1	422400	2	902	18	1
685600	108	522910	Pakuranga Central	803	Pakuranga Ward	8	Manukau City	02	Auckland Region	2.67817e+06	6.475e+06	1	685600	4	951	38	2
422100	165	515201	Herne Bay	701	Western Bays Ward	7	Auckland City	02	Auckland Region	2.66471e+06	6.48255e+06	1	422100	1	882	54	1
2127200	90	573000	Lambton	4703	Lambton Ward	47	Wellington City	09	Wellington Region	2.65856e+06	5.98964e+06	1	2127200	6	993	31	2
2127000	39	573000	Lambton	4703	Lambton Ward	47	Wellington City	09	Wellington Region	2.65866e+06	5.98966e+06	1	2127000	8	1047	18	3
1602100	96	552200	Welbourn	3301	New Plymouth City Ward	33	New Plymouth District	07	Taranaki Region	2.6044e+06	6.23631e+06	1	1602100	7	1007	34	2
1470900	102	545710	Twyford	3003	Heretaunga Ward	30	Hastings District	06	Hawke's Bay Region	2.83586e+06	6.17034e+06	1	1470900	3	923	34	1
422000	87	515201	Herne Bay	701	Western Bays Ward	7	Auckland City	02	Auckland Region	2.66461e+06	6.48248e+06	1	422000	1	879	29	1
2781200	147	598800	Waimataitai	6404	Timaru Ward	64	Timaru District	13	Canterbury Region	2.36985e+06	5.64639e+06	1	2781200	7	1009	51	2
2364100	51	584202	Richmond West	5105	Richmond Ward	51	Tasman District	16	Tasman Region	2.52544e+06	5.98516e+06	1	2364100	8	1050	23	3
684900	123	522920	Edgewater	803	Pakuranga Ward	8	Manukau City	02	Auckland Region	2.67701e+06	6.47418e+06	1	684900	8	1057	55	3
685700	132	522910	Pakuranga Central	803	Pakuranga Ward	8	Manukau City	02	Auckland Region	2.67811e+06	6.47485e+06	1	685700	5	971	46	2
423000	81	515201	Herne Bay	701	Western Bays Ward	7	Auckland City	02	Auckland Region	2.66506e+06	6.48265e+06	1	423000	2	900	27	1
1471700	66	545721	Karamu	3003	Heretaunga Ward	30	Hastings District	06	Hawke's Bay Region	2.84215e+06	6.16813e+06	1	1471700	7	1023	23	2
2127300	6	573000	Lambton	4703	Lambton Ward	47	Wellington City	09	Wellington Region	2.65868e+06	5.98957e+06	1	2127300	8	1047	3	3
1602000	81	552200	Welbourn	3301	New Plymouth City Ward	33	New Plymouth District	07	Taranaki Region	2.60445e+06	6.23612e+06	1	1602000	5	973	28	2
2126100	21	573000	Lambton	4703	Lambton Ward	47	Wellington City	09	Wellington Region	2.65848e+06	5.98991e+06	1	2126100	9	1121	9	3
2912100	114	604210	Caversham	7106	South Dunedin Ward	71	Dunedin City	14	Otago Region	2.31402e+06	5.47591e+06	1	2912100	8	1050	51	3
2912200	114	604210	Caversham	7106	South Dunedin Ward	71	Dunedin City	14	Otago Region	2.31408e+06	5.47586e+06	1	2912200	7	1006	40	2
2912300	120	604210	Caversham	7106	South Dunedin Ward	71	Dunedin City	14	Otago Region	2.31417e+06	5.47585e+06	1	2912300	8	1032	54	3
684702	42	522920	Edgewater	803	Pakuranga Ward	8	Manukau City	02	Auckland Region	2.67698e+06	6.47433e+06	1	684702	7	1008	15	2
554500	75	518302	Mt Eden South	703	Eden-Albert Ward	7	Auckland City	02	Auckland Region	2.6656e+06	6.47724e+06	1	554500	4	950	26	2
422800	123	515201	Herne Bay	701	Western Bays Ward	7	Auckland City	02	Auckland Region	2.66502e+06	6.48284e+06	1	422800	3	925	41	1
422700	48	515201	Herne Bay	701	Western Bays Ward	7	Auckland City	02	Auckland Region	2.66505e+06	6.48301e+06	1	422700	1	898	16	1
685100	162	522910	Pakuranga Central	803	Pakuranga Ward	8	Manukau City	02	Auckland Region	2.67753e+06	6.47482e+06	1	685100	5	954	57	2
2126200	9	573000	Lambton	4703	Lambton Ward	47	Wellington City	09	Wellington Region	2.65865e+06	5.98984e+06	1	2126200	8	1047	4	3
2125900	3	573000	Lambton	4703	Lambton Ward	47	Wellington City	09	Wellington Region	2.65886e+06	5.98974e+06	1	2125900	8	1047	1	3
2127400	3	573000	Lambton	4703	Lambton Ward	47	Wellington City	09	Wellington Region	2.65874e+06	5.9895e+06	1	2127400	8	1047	1	3
816501	312	525910	Pukekohe North	1003	Pukekohe Ward	10	Franklin District	02	Auckland Region	2.67975e+06	6.44428e+06	1	816501	3	929	103	1
1470311	180	548611	Kingsley-Chatham	3006	Flaxmere Ward	30	Hastings District	06	Hawke's Bay Region	2.83347e+06	6.16978e+06	1	1470311	10	1259	81	3
1470319	156	548611	Kingsley-Chatham	3006	Flaxmere Ward	30	Hastings District	06	Hawke's Bay Region	2.8336e+06	6.16985e+06	1	1470319	10	1247	70	3
1470318	135	548611	Kingsley-Chatham	3006	Flaxmere Ward	30	Hastings District	06	Hawke's Bay Region	2.83355e+06	6.16998e+06	1	1470318	10	1151	61	3
2117800	39	572900	Thorndon-Tinakori Road	4703	Lambton Ward	47	Wellington City	09	Wellington Region	2.65912e+06	5.99148e+06	1	2117800	4	938	14	2
2913900	117	604210	Caversham	7104	Hills Ward	71	Dunedin City	14	Otago Region	2.31515e+06	5.47681e+06	1	2913900	7	1008	41	2
2913800	102	604210	Caversham	7104	Hills Ward	71	Dunedin City	14	Otago Region	2.31504e+06	5.47671e+06	1	2913800	8	1039	46	3
2190300	120	576002	Island Bay East	4705	Southern Ward	47	Wellington City	09	Wellington Region	2.6585e+06	5.98453e+06	1	2190300	4	944	42	2
2650900	6	591500	Cathedral Square	6005	Hagley-Ferrymead Ward	60	Christchurch City	13	Canterbury Region	2.48148e+06	5.741e+06	1	2650900	7	1026	2	2
421800	105	515201	Herne Bay	701	Western Bays Ward	7	Auckland City	02	Auckland Region	2.66464e+06	6.48277e+06	1	421800	2	904	35	1
291000	174	512100	Green Bay	604	New Lynn Ward	6	Waitakere City	02	Auckland Region	2.66037e+06	6.47304e+06	1	291000	4	948	61	2
423500	189	515201	Herne Bay	701	Western Bays Ward	7	Auckland City	02	Auckland Region	2.66532e+06	6.48281e+06	1	423500	3	929	62	1
423400	135	515201	Herne Bay	701	Western Bays Ward	7	Auckland City	02	Auckland Region	2.66523e+06	6.48268e+06	1	423400	4	947	47	2
2126600	54	573000	Lambton	4703	Lambton Ward	47	Wellington City	09	Wellington Region	2.65867e+06	5.98973e+06	1	2126600	8	1047	24	3
2126800	24	573000	Lambton	4703	Lambton Ward	47	Wellington City	09	Wellington Region	2.65839e+06	5.98978e+06	1	2126800	9	1121	11	3
685400	105	522910	Pakuranga Central	803	Pakuranga Ward	8	Manukau City	02	Auckland Region	2.67798e+06	6.47507e+06	1	685400	4	952	37	2
1601500	54	552200	Welbourn	3301	New Plymouth City Ward	33	New Plymouth District	07	Taranaki Region	2.60457e+06	6.23679e+06	1	1601500	4	945	19	2
422900	93	515201	Herne Bay	701	Western Bays Ward	7	Auckland City	02	Auckland Region	2.66511e+06	6.48286e+06	1	422900	1	898	31	1
291600	129	511902	Crum Park	604	New Lynn Ward	6	Waitakere City	02	Auckland Region	2.65888e+06	6.47332e+06	1	291600	7	1014	45	2
2126900	108	573000	Lambton	4703	Lambton Ward	47	Wellington City	09	Wellington Region	2.65837e+06	5.98942e+06	1	2126900	7	1004	38	2
2125700	3	573000	Lambton	4703	Lambton Ward	47	Wellington City	09	Wellington Region	2.65875e+06	5.98991e+06	1	2125700	8	1047	1	3
421900	132	515201	Herne Bay	701	Western Bays Ward	7	Auckland City	02	Auckland Region	2.66454e+06	6.48246e+06	1	421900	1	870	44	1
2913200	75	604210	Caversham	7106	South Dunedin Ward	71	Dunedin City	14	Otago Region	2.31458e+06	5.47603e+06	1	2913200	10	1183	34	3
2913700	72	604210	Caversham	7104	Hills Ward	71	Dunedin City	14	Otago Region	2.31489e+06	5.47664e+06	1	2913700	8	1052	32	3
290701	78	512100	Green Bay	604	New Lynn Ward	6	Waitakere City	02	Auckland Region	2.65916e+06	6.473e+06	1	290701	3	932	26	1
423300	99	515201	Herne Bay	701	Western Bays Ward	7	Auckland City	02	Auckland Region	2.66519e+06	6.4829e+06	1	423300	2	901	33	1
683900	165	522920	Edgewater	803	Pakuranga Ward	8	Manukau City	02	Auckland Region	2.67694e+06	6.4747e+06	1	683900	8	1053	74	3
1472000	66	545721	Karamu	3003	Heretaunga Ward	30	Hastings District	06	Hawke's Bay Region	2.84247e+06	6.16819e+06	1	1472000	5	971	23	2
1601900	129	552200	Welbourn	3301	New Plymouth City Ward	33	New Plymouth District	07	Taranaki Region	2.60482e+06	6.236e+06	1	1601900	4	940	45	2
2125800	27	573000	Lambton	4703	Lambton Ward	47	Wellington City	09	Wellington Region	2.6588e+06	5.98984e+06	1	2125800	8	1047	12	3
1471201	33	545710	Twyford	3003	Heretaunga Ward	30	Hastings District	06	Hawke's Bay Region	2.83856e+06	6.16998e+06	1	1471201	2	909	11	1
423200	69	515201	Herne Bay	701	Western Bays Ward	7	Auckland City	02	Auckland Region	2.66522e+06	6.48303e+06	1	423200	3	919	23	1
290703	153	512100	Green Bay	604	New Lynn Ward	6	Waitakere City	02	Auckland Region	2.65938e+06	6.4729e+06	1	290703	3	932	50	1
291800	81	511902	Crum Park	604	New Lynn Ward	6	Waitakere City	02	Auckland Region	2.65902e+06	6.47317e+06	1	291800	4	942	28	2
2781600	120	598800	Waimataitai	6404	Timaru Ward	64	Timaru District	13	Canterbury Region	2.37016e+06	5.64617e+06	1	2781600	5	964	42	2
2781300	129	598800	Waimataitai	6404	Timaru Ward	64	Timaru District	13	Canterbury Region	2.36997e+06	5.64625e+06	1	2781300	8	1054	58	3
2781100	93	598800	Waimataitai	6404	Timaru Ward	64	Timaru District	13	Canterbury Region	2.36968e+06	5.64637e+06	1	2781100	5	971	33	2
2781400	126	598800	Waimataitai	6404	Timaru Ward	64	Timaru District	13	Canterbury Region	2.36976e+06	5.64607e+06	1	2781400	8	1061	57	3
685000	198	522910	Pakuranga Central	803	Pakuranga Ward	8	Manukau City	02	Auckland Region	2.67757e+06	6.47498e+06	1	685000	6	976	69	2
685200	162	522910	Pakuranga Central	803	Pakuranga Ward	8	Manukau City	02	Auckland Region	2.67776e+06	6.47489e+06	1	685200	4	946	57	2
1470309	102	548611	Kingsley-Chatham	3006	Flaxmere Ward	30	Hastings District	06	Hawke's Bay Region	2.834e+06	6.16983e+06	1	1470309	10	1255	46	3
1471300	243	545710	Twyford	3003	Heretaunga Ward	30	Hastings District	06	Hawke's Bay Region	2.83947e+06	6.16915e+06	1	1471300	5	957	85	2
422300	39	515201	Herne Bay	701	Western Bays Ward	7	Auckland City	02	Auckland Region	2.66487e+06	6.48289e+06	1	422300	2	902	13	1
422600	192	515201	Herne Bay	701	Western Bays Ward	7	Auckland City	02	Auckland Region	2.66496e+06	6.48266e+06	1	422600	3	931	63	1
2912500	102	604210	Caversham	7106	South Dunedin Ward	71	Dunedin City	14	Otago Region	2.31426e+06	5.4759e+06	1	2912500	5	972	36	2
684602	69	522920	Edgewater	803	Pakuranga Ward	8	Manukau City	02	Auckland Region	2.6771e+06	6.47427e+06	1	684602	8	1034	31	3
2785100	84	599100	Highfield	6404	Timaru Ward	64	Timaru District	13	Canterbury Region	2.36783e+06	5.64488e+06	1	2785100	6	989	29	2
425701	165	515202	St Marys	701	Western Bays Ward	7	Auckland City	02	Auckland Region	2.66601e+06	6.48289e+06	1	425701	3	924	54	1
688500	87	523000	Pakuranga East	803	Pakuranga Ward	8	Manukau City	02	Auckland Region	2.6787e+06	6.47406e+06	1	688500	6	998	30	2
556600	114	518301	Maungawhau	703	Eden-Albert Ward	7	Auckland City	02	Auckland Region	2.66713e+06	6.47752e+06	1	556600	4	936	40	2
688800	156	523000	Pakuranga East	803	Pakuranga Ward	8	Manukau City	02	Auckland Region	2.67853e+06	6.47457e+06	1	688800	6	991	55	2
426601	108	515301	Ponsonby West	701	Western Bays Ward	7	Auckland City	02	Auckland Region	2.6649e+06	6.48216e+06	1	426601	2	906	36	1
1475701	171	548620	Flaxmere East	3006	Flaxmere Ward	30	Hastings District	06	Hawke's Bay Region	2.83569e+06	6.16787e+06	1	1475701	10	1222	77	3
820300	135	525910	Pukekohe North	1003	Pukekohe Ward	10	Franklin District	02	Auckland Region	2.6788e+06	6.44304e+06	1	820300	10	1253	61	3
426400	81	515301	Ponsonby West	701	Western Bays Ward	7	Auckland City	02	Auckland Region	2.66495e+06	6.48237e+06	1	426400	3	926	27	1
2523100	72	588700	Bishopdale	6002	Fendalton-Waimairi Ward	60	Christchurch City	13	Canterbury Region	2.47649e+06	5.74637e+06	1	2523100	9	1099	32	3
688102	123	523000	Pakuranga East	803	Pakuranga Ward	8	Manukau City	02	Auckland Region	2.67832e+06	6.47407e+06	1	688102	5	962	43	2
425702	75	515202	St Marys	701	Western Bays Ward	7	Auckland City	02	Auckland Region	2.66624e+06	6.48277e+06	1	425702	3	926	25	1
2129900	36	573000	Lambton	4703	Lambton Ward	47	Wellington City	09	Wellington Region	2.65822e+06	5.98885e+06	1	2129900	6	998	13	2
2129400	69	573000	Lambton	4703	Lambton Ward	47	Wellington City	09	Wellington Region	2.65831e+06	5.98902e+06	1	2129400	5	969	24	2
557500	192	518302	Mt Eden South	703	Eden-Albert Ward	7	Auckland City	02	Auckland Region	2.66722e+06	6.47693e+06	1	557500	4	949	67	2
1475200	183	548620	Flaxmere East	3006	Flaxmere Ward	30	Hastings District	06	Hawke's Bay Region	2.83519e+06	6.16831e+06	1	1475200	10	1297	82	3
427100	84	515301	Ponsonby West	701	Western Bays Ward	7	Auckland City	02	Auckland Region	2.66504e+06	6.4824e+06	1	427100	2	910	28	1
1473902	246	548611	Kingsley-Chatham	3006	Flaxmere Ward	30	Hastings District	06	Hawke's Bay Region	2.83404e+06	6.16922e+06	1	1473902	10	1198	111	3
2521400	90	588700	Bishopdale	6002	Fendalton-Waimairi Ward	60	Christchurch City	13	Canterbury Region	2.47646e+06	5.74575e+06	1	2521400	4	947	31	2
2521600	99	588700	Bishopdale	6002	Fendalton-Waimairi Ward	60	Christchurch City	13	Canterbury Region	2.47678e+06	5.74572e+06	1	2521600	4	947	35	2
2915600	54	604210	Caversham	7106	South Dunedin Ward	71	Dunedin City	14	Otago Region	2.3142e+06	5.4761e+06	1	2915600	5	964	19	2
685800	126	522910	Pakuranga Central	803	Pakuranga Ward	8	Manukau City	02	Auckland Region	2.67802e+06	6.47471e+06	1	685800	3	920	42	1
2653400	12	591500	Cathedral Square	6005	Hagley-Ferrymead Ward	60	Christchurch City	13	Canterbury Region	2.48043e+06	5.74207e+06	1	2653400	9	1078	5	3
1472900	39	545721	Karamu	3003	Heretaunga Ward	30	Hastings District	06	Hawke's Bay Region	2.84126e+06	6.16495e+06	1	1472900	4	940	14	2
686800	201	522920	Edgewater	803	Pakuranga Ward	8	Manukau City	02	Auckland Region	2.67734e+06	6.47416e+06	1	686800	9	1084	90	3
2128100	6	573000	Lambton	4703	Lambton Ward	47	Wellington City	09	Wellington Region	2.65862e+06	5.98944e+06	1	2128100	8	1040	3	3
2914100	21	604210	Caversham	7104	Hills Ward	71	Dunedin City	14	Otago Region	2.31535e+06	5.47662e+06	1	2914100	9	1074	9	3
2914000	54	604210	Caversham	7104	Hills Ward	71	Dunedin City	14	Otago Region	2.31526e+06	5.4766e+06	1	2914000	8	1052	24	3
2915200	75	604210	Caversham	7104	Hills Ward	71	Dunedin City	14	Otago Region	2.31471e+06	5.47662e+06	1	2915200	5	972	26	2
2915100	105	604210	Caversham	7104	Hills Ward	71	Dunedin City	14	Otago Region	2.31456e+06	5.47659e+06	1	2915100	5	957	37	2
2915000	78	604210	Caversham	7104	Hills Ward	71	Dunedin City	14	Otago Region	2.3142e+06	5.47652e+06	1	2915000	5	972	27	2
686300	174	522910	Pakuranga Central	803	Pakuranga Ward	8	Manukau City	02	Auckland Region	2.67775e+06	6.4746e+06	1	686300	6	992	61	2
686200	135	522910	Pakuranga Central	803	Pakuranga Ward	8	Manukau City	02	Auckland Region	2.67778e+06	6.47446e+06	1	686200	1	861	45	1
2653100	66	591500	Cathedral Square	6005	Hagley-Ferrymead Ward	60	Christchurch City	13	Canterbury Region	2.48048e+06	5.74243e+06	1	2653100	8	1031	30	3
2653000	54	591500	Cathedral Square	6005	Hagley-Ferrymead Ward	60	Christchurch City	13	Canterbury Region	2.48027e+06	5.74244e+06	1	2653000	9	1078	24	3
687000	315	522920	Edgewater	803	Pakuranga Ward	8	Manukau City	02	Auckland Region	2.67771e+06	6.4738e+06	1	687000	8	1036	142	3
818400	138	525910	Pukekohe North	1003	Pukekohe Ward	10	Franklin District	02	Auckland Region	2.67924e+06	6.44328e+06	1	818400	9	1130	62	3
1473700	9	548620	Flaxmere East	3006	Flaxmere Ward	30	Hastings District	06	Hawke's Bay Region	2.83499e+06	6.16862e+06	1	1473700	9	1090	4	3
2521700	81	588700	Bishopdale	6002	Fendalton-Waimairi Ward	60	Christchurch City	13	Canterbury Region	2.47651e+06	5.74564e+06	1	2521700	3	923	27	1
2521300	90	588700	Bishopdale	6002	Fendalton-Waimairi Ward	60	Christchurch City	13	Canterbury Region	2.47663e+06	5.74585e+06	1	2521300	5	955	31	2
2914500	6	604210	Caversham	7106	South Dunedin Ward	71	Dunedin City	14	Otago Region	2.31517e+06	5.47633e+06	1	2914500	9	1121	3	3
2915400	99	604210	Caversham	7106	South Dunedin Ward	71	Dunedin City	14	Otago Region	2.31473e+06	5.4763e+06	1	2915400	9	1132	45	3
686700	201	522910	Pakuranga Central	803	Pakuranga Ward	8	Manukau City	02	Auckland Region	2.6779e+06	6.47436e+06	1	686700	5	968	70	2
425000	84	515202	St Marys	701	Western Bays Ward	7	Auckland City	02	Auckland Region	2.66579e+06	6.48256e+06	1	425000	4	951	29	2
686900	93	522920	Edgewater	803	Pakuranga Ward	8	Manukau City	02	Auckland Region	2.67746e+06	6.47391e+06	1	686900	5	955	33	2
2129300	57	573000	Lambton	4703	Lambton Ward	47	Wellington City	09	Wellington Region	2.65824e+06	5.98905e+06	1	2129300	5	969	20	2
2128400	147	573000	Lambton	4703	Lambton Ward	47	Wellington City	09	Wellington Region	2.65859e+06	5.98932e+06	1	2128400	8	1068	66	3
2129200	66	573000	Lambton	4703	Lambton Ward	47	Wellington City	09	Wellington Region	2.65836e+06	5.9893e+06	1	2129200	7	1004	23	2
818600	27	525910	Pukekohe North	1003	Pukekohe Ward	10	Franklin District	02	Auckland Region	2.67938e+06	6.4431e+06	1	818600	2	915	9	1
817300	84	525910	Pukekohe North	1003	Pukekohe Ward	10	Franklin District	02	Auckland Region	2.67977e+06	6.44299e+06	1	817300	7	1019	29	2
2127600	105	573000	Lambton	4703	Lambton Ward	47	Wellington City	09	Wellington Region	2.65853e+06	5.98955e+06	1	2127600	9	1073	47	3
424900	108	515202	St Marys	701	Western Bays Ward	7	Auckland City	02	Auckland Region	2.66585e+06	6.48264e+06	1	424900	3	934	36	1
424500	162	515202	St Marys	701	Western Bays Ward	7	Auckland City	02	Auckland Region	2.66566e+06	6.48271e+06	1	424500	2	915	53	1
1473400	6	548400	Woolwich	3006	Flaxmere Ward	30	Hastings District	06	Hawke's Bay Region	2.83637e+06	6.16958e+06	1	1473400	6	990	2	2
2521800	105	588700	Bishopdale	6002	Fendalton-Waimairi Ward	60	Christchurch City	13	Canterbury Region	2.47631e+06	5.7456e+06	1	2521800	4	953	37	2
2522200	96	588700	Bishopdale	6002	Fendalton-Waimairi Ward	60	Christchurch City	13	Canterbury Region	2.47667e+06	5.74618e+06	1	2522200	5	954	34	2
2522300	147	588700	Bishopdale	6002	Fendalton-Waimairi Ward	60	Christchurch City	13	Canterbury Region	2.47683e+06	5.74617e+06	1	2522300	5	956	51	2
2914700	93	604210	Caversham	7106	South Dunedin Ward	71	Dunedin City	14	Otago Region	2.31488e+06	5.47623e+06	1	2914700	9	1121	42	3
2915700	87	604210	Caversham	7106	South Dunedin Ward	71	Dunedin City	14	Otago Region	2.31416e+06	5.47628e+06	1	2915700	5	964	30	2
554700	123	518302	Mt Eden South	703	Eden-Albert Ward	7	Auckland City	02	Auckland Region	2.66557e+06	6.47712e+06	1	554700	4	950	43	2
2653200	21	591500	Cathedral Square	6005	Hagley-Ferrymead Ward	60	Christchurch City	13	Canterbury Region	2.48055e+06	5.74231e+06	1	2653200	9	1078	9	3
425200	93	515202	St Marys	701	Western Bays Ward	7	Auckland City	02	Auckland Region	2.66621e+06	6.48262e+06	1	425200	2	900	31	1
293002	117	511902	Crum Park	604	New Lynn Ward	6	Waitakere City	02	Auckland Region	2.6584e+06	6.47316e+06	1	293002	2	907	39	1
817200	240	525922	Bledisloe Park	1003	Pukekohe Ward	10	Franklin District	02	Auckland Region	2.67995e+06	6.44281e+06	1	817200	4	952	84	2
294101	81	511901	Kaurilands	604	New Lynn Ward	6	Waitakere City	02	Auckland Region	2.65802e+06	6.47307e+06	1	294101	1	898	27	1
425300	111	515202	St Marys	701	Western Bays Ward	7	Auckland City	02	Auckland Region	2.66593e+06	6.48247e+06	1	425300	3	933	37	1
425100	126	515202	St Marys	701	Western Bays Ward	7	Auckland City	02	Auckland Region	2.66602e+06	6.48256e+06	1	425100	1	881	42	1
2522500	126	588700	Bishopdale	6002	Fendalton-Waimairi Ward	60	Christchurch City	13	Canterbury Region	2.47695e+06	5.74603e+06	1	2522500	4	949	44	2
424701	45	515202	St Marys	701	Western Bays Ward	7	Auckland City	02	Auckland Region	2.66594e+06	6.48284e+06	1	424701	1	893	15	1
424702	78	515202	St Marys	701	Western Bays Ward	7	Auckland City	02	Auckland Region	2.66586e+06	6.48277e+06	1	424702	1	893	26	1
686000	189	522910	Pakuranga Central	803	Pakuranga Ward	8	Manukau City	02	Auckland Region	2.67748e+06	6.47425e+06	1	686000	7	1004	66	2
2128800	162	573000	Lambton	4703	Lambton Ward	47	Wellington City	09	Wellington Region	2.65834e+06	5.98923e+06	1	2128800	8	1068	73	3
2128000	105	573000	Lambton	4703	Lambton Ward	47	Wellington City	09	Wellington Region	2.65851e+06	5.9895e+06	1	2128000	8	1040	47	3
2129000	141	573000	Lambton	4703	Lambton Ward	47	Wellington City	09	Wellington Region	2.65848e+06	5.9892e+06	1	2129000	10	1500	63	3
2129100	6	573000	Lambton	4703	Lambton Ward	47	Wellington City	09	Wellington Region	2.65854e+06	5.9892e+06	1	2129100	7	1004	2	2
2127900	93	573000	Lambton	4703	Lambton Ward	47	Wellington City	09	Wellington Region	2.65849e+06	5.98944e+06	1	2127900	8	1040	42	3
817902	108	525910	Pukekohe North	1003	Pukekohe Ward	10	Franklin District	02	Auckland Region	2.67893e+06	6.44361e+06	1	817902	6	989	38	2
818100	198	525910	Pukekohe North	1003	Pukekohe Ward	10	Franklin District	02	Auckland Region	2.67928e+06	6.4436e+06	1	818100	5	961	69	2
818200	213	525910	Pukekohe North	1003	Pukekohe Ward	10	Franklin District	02	Auckland Region	2.67942e+06	6.44352e+06	1	818200	7	1022	75	2
424400	36	515202	St Marys	701	Western Bays Ward	7	Auckland City	02	Auckland Region	2.6658e+06	6.48292e+06	1	424400	6	990	13	2
1473500	3	548400	Woolwich	3006	Flaxmere Ward	30	Hastings District	06	Hawke's Bay Region	2.83722e+06	6.1691e+06	1	1473500	6	990	1	2
1473600	36	548400	Woolwich	3006	Flaxmere Ward	30	Hastings District	06	Hawke's Bay Region	2.83739e+06	6.16923e+06	1	1473600	6	990	13	2
2522000	141	588700	Bishopdale	6002	Fendalton-Waimairi Ward	60	Christchurch City	13	Canterbury Region	2.47629e+06	5.74548e+06	1	2522000	5	964	49	2
2522400	90	588700	Bishopdale	6002	Fendalton-Waimairi Ward	60	Christchurch City	13	Canterbury Region	2.47677e+06	5.74599e+06	1	2522400	4	942	31	2
2914200	63	604210	Caversham	7106	South Dunedin Ward	71	Dunedin City	14	Otago Region	2.31546e+06	5.47669e+06	1	2914200	9	1074	28	3
686400	258	522910	Pakuranga Central	803	Pakuranga Ward	8	Manukau City	02	Auckland Region	2.67778e+06	6.4741e+06	1	686400	4	942	90	2
686502	75	522910	Pakuranga Central	803	Pakuranga Ward	8	Manukau City	02	Auckland Region	2.67781e+06	6.47386e+06	1	686502	5	963	26	2
292900	63	511902	Crum Park	604	New Lynn Ward	6	Waitakere City	02	Auckland Region	2.65879e+06	6.47335e+06	1	292900	2	900	21	1
686501	117	522910	Pakuranga Central	803	Pakuranga Ward	8	Manukau City	02	Auckland Region	2.6779e+06	6.47398e+06	1	686501	5	963	41	2
2128700	111	573000	Lambton	4703	Lambton Ward	47	Wellington City	09	Wellington Region	2.65841e+06	5.98918e+06	1	2128700	8	1068	50	3
2128200	153	573000	Lambton	4703	Lambton Ward	47	Wellington City	09	Wellington Region	2.65843e+06	5.98934e+06	1	2128200	5	967	54	2
818300	72	525910	Pukekohe North	1003	Pukekohe Ward	10	Franklin District	02	Auckland Region	2.67907e+06	6.44337e+06	1	818300	10	1150	32	3
424800	156	515202	St Marys	701	Western Bays Ward	7	Auckland City	02	Auckland Region	2.66603e+06	6.48269e+06	1	424800	1	878	51	1
2522100	126	588700	Bishopdale	6002	Fendalton-Waimairi Ward	60	Christchurch City	13	Canterbury Region	2.47651e+06	5.74537e+06	1	2522100	7	1022	44	2
2123100	99	572900	Thorndon-Tinakori Road	4703	Lambton Ward	47	Wellington City	09	Wellington Region	2.65839e+06	5.99078e+06	1	2123100	2	899	33	1
293302	45	512100	Green Bay	604	New Lynn Ward	6	Waitakere City	02	Auckland Region	2.65904e+06	6.4729e+06	1	293302	5	962	16	2
293301	135	511902	Crum Park	604	New Lynn Ward	6	Waitakere City	02	Auckland Region	2.65899e+06	6.47284e+06	1	293301	5	962	47	2
2128300	24	573000	Lambton	4703	Lambton Ward	47	Wellington City	09	Wellington Region	2.6585e+06	5.98933e+06	1	2128300	8	1068	11	3
2128900	120	573000	Lambton	4703	Lambton Ward	47	Wellington City	09	Wellington Region	2.65829e+06	5.98929e+06	1	2128900	7	1025	42	2
817600	120	525910	Pukekohe North	1003	Pukekohe Ward	10	Franklin District	02	Auckland Region	2.6792e+06	6.44437e+06	1	817600	5	967	42	2
293200	57	511902	Crum Park	604	New Lynn Ward	6	Waitakere City	02	Auckland Region	2.65844e+06	6.47302e+06	1	293200	3	934	19	1
425400	75	515202	St Marys	701	Western Bays Ward	7	Auckland City	02	Auckland Region	2.66614e+06	6.48243e+06	1	425400	1	879	25	1
2914600	87	604210	Caversham	7106	South Dunedin Ward	71	Dunedin City	14	Otago Region	2.31498e+06	5.4763e+06	1	2914600	10	1182	39	3
2786602	108	599100	Highfield	6404	Timaru Ward	64	Timaru District	13	Canterbury Region	2.36808e+06	5.64481e+06	1	2786602	2	904	36	1
2786601	42	599100	Highfield	6404	Timaru Ward	64	Timaru District	13	Canterbury Region	2.36824e+06	5.64484e+06	1	2786601	4	951	15	2
2131600	270	573101	Willis Street-Cambridge Terrace	4703	Lambton Ward	47	Wellington City	09	Wellington Region	2.65849e+06	5.98891e+06	1	2131600	10	1255	122	3
952105	225	527006	Flagstaff	1602	East Ward	16	Hamilton City	03	Waikato Region	2.70907e+06	6.38234e+06	1	952105	4	938	79	2
2131500	201	573101	Willis Street-Cambridge Terrace	4703	Lambton Ward	47	Wellington City	09	Wellington Region	2.65867e+06	5.98895e+06	1	2131500	6	988	70	2
2131300	135	573101	Willis Street-Cambridge Terrace	4703	Lambton Ward	47	Wellington City	09	Wellington Region	2.65867e+06	5.98916e+06	1	2131300	8	1056	61	3
2131100	114	573101	Willis Street-Cambridge Terrace	4703	Lambton Ward	47	Wellington City	09	Wellington Region	2.65874e+06	5.98924e+06	1	2131100	10	1176	51	3
821500	135	525921	Pukekohe West	1003	Pukekohe Ward	10	Franklin District	02	Auckland Region	2.67885e+06	6.44288e+06	1	821500	10	1206	61	3
1476800	123	547800	Frimley	3005	Hastings Ward	30	Hastings District	06	Hawke's Bay Region	2.83825e+06	6.16858e+06	1	1476800	7	1015	43	2
2525600	186	588500	Kaimahi	6002	Fendalton-Waimairi Ward	60	Christchurch City	13	Canterbury Region	2.47707e+06	5.74653e+06	1	2525600	6	984	65	2
2525500	198	588500	Kaimahi	6002	Fendalton-Waimairi Ward	60	Christchurch City	13	Canterbury Region	2.47694e+06	5.74647e+06	1	2525500	6	985	69	2
2525203	189	588500	Kaimahi	6002	Fendalton-Waimairi Ward	60	Christchurch City	13	Canterbury Region	2.47707e+06	5.74702e+06	1	2525203	8	1049	85	3
427700	144	515301	Ponsonby West	701	Western Bays Ward	7	Auckland City	02	Auckland Region	2.66529e+06	6.48228e+06	1	427700	2	909	48	1
821700	129	525921	Pukekohe West	1003	Pukekohe Ward	10	Franklin District	02	Auckland Region	2.67875e+06	6.44258e+06	1	821700	7	1022	45	2
821001	192	525921	Pukekohe West	1003	Pukekohe Ward	10	Franklin District	02	Auckland Region	2.67831e+06	6.44255e+06	1	821001	9	1077	86	3
820703	186	525921	Pukekohe West	1003	Pukekohe Ward	10	Franklin District	02	Auckland Region	2.67808e+06	6.4426e+06	1	820703	6	981	65	2
820800	51	525921	Pukekohe West	1003	Pukekohe Ward	10	Franklin District	02	Auckland Region	2.67766e+06	6.44229e+06	1	820800	7	1009	18	2
558702	18	518302	Mt Eden South	702	Avondale-Roskill Ward	7	Auckland City	02	Auckland Region	2.66658e+06	6.4766e+06	1	558702	3	924	6	1
1474101	243	548612	Lochain	3006	Flaxmere Ward	30	Hastings District	06	Hawke's Bay Region	2.83451e+06	6.16935e+06	1	1474101	10	1187	109	3
689400	198	523000	Pakuranga East	803	Pakuranga Ward	8	Manukau City	02	Auckland Region	2.67891e+06	6.47431e+06	1	689400	7	1005	69	2
2522700	117	588700	Bishopdale	6002	Fendalton-Waimairi Ward	60	Christchurch City	13	Canterbury Region	2.47648e+06	5.74594e+06	1	2522700	7	1006	41	2
2917101	42	604130	Kenmure	7104	Hills Ward	71	Dunedin City	14	Otago Region	2.31338e+06	5.47678e+06	1	2917101	2	901	14	1
2916300	54	604210	Caversham	7106	South Dunedin Ward	71	Dunedin City	14	Otago Region	2.31367e+06	5.47617e+06	1	2916300	9	1132	24	3
2786400	150	599100	Highfield	6404	Timaru Ward	64	Timaru District	13	Canterbury Region	2.36786e+06	5.64512e+06	1	2786400	5	962	52	2
2786200	63	599100	Highfield	6404	Timaru Ward	64	Timaru District	13	Canterbury Region	2.36795e+06	5.64522e+06	1	2786200	1	880	21	1
2786300	102	599100	Highfield	6404	Timaru Ward	64	Timaru District	13	Canterbury Region	2.36812e+06	5.6452e+06	1	2786300	1	896	34	1
2654100	174	591700	Avon Loop	6005	Hagley-Ferrymead Ward	60	Christchurch City	13	Canterbury Region	2.48029e+06	5.74255e+06	1	2654100	10	1209	78	3
2654200	123	591700	Avon Loop	6005	Hagley-Ferrymead Ward	60	Christchurch City	13	Canterbury Region	2.48047e+06	5.74256e+06	1	2654200	8	1059	55	3
2653700	6	591700	Avon Loop	6005	Hagley-Ferrymead Ward	60	Christchurch City	13	Canterbury Region	2.48009e+06	5.74272e+06	1	2653700	5	964	2	2
2653800	69	591700	Avon Loop	6005	Hagley-Ferrymead Ward	60	Christchurch City	13	Canterbury Region	2.48029e+06	5.74282e+06	1	2653800	5	964	24	2
2654400	27	591700	Avon Loop	6005	Hagley-Ferrymead Ward	60	Christchurch City	13	Canterbury Region	2.48076e+06	5.74285e+06	1	2654400	9	1073	12	3
2654300	60	591700	Avon Loop	6005	Hagley-Ferrymead Ward	60	Christchurch City	13	Canterbury Region	2.4805e+06	5.74284e+06	1	2654300	8	1043	27	3
426602	75	515301	Ponsonby West	701	Western Bays Ward	7	Auckland City	02	Auckland Region	2.66483e+06	6.48214e+06	1	426602	3	926	25	1
425500	108	515202	St Marys	701	Western Bays Ward	7	Auckland City	02	Auckland Region	2.66608e+06	6.48237e+06	1	425500	9	1119	49	3
2130300	108	573000	Lambton	4703	Lambton Ward	47	Wellington City	09	Wellington Region	2.65819e+06	5.98877e+06	1	2130300	7	1017	38	2
556500	162	518301	Maungawhau	703	Eden-Albert Ward	7	Auckland City	02	Auckland Region	2.66697e+06	6.47757e+06	1	556500	3	930	53	1
426300	162	515301	Ponsonby West	701	Western Bays Ward	7	Auckland City	02	Auckland Region	2.6647e+06	6.48213e+06	1	426300	4	939	57	2
180204	171	508807	North Harbour East	501	Northern Ward	5	North Shore City	02	Auckland Region	2.66167e+06	6.49421e+06	1	180204	4	952	60	2
2915900	168	604210	Caversham	7104	Hills Ward	71	Dunedin City	14	Otago Region	2.31357e+06	5.47653e+06	1	2915900	2	908	55	1
2916000	141	604210	Caversham	7104	Hills Ward	71	Dunedin City	14	Otago Region	2.31386e+06	5.47657e+06	1	2916000	6	995	49	2
687700	213	522910	Pakuranga Central	803	Pakuranga Ward	8	Manukau City	02	Auckland Region	2.67819e+06	6.47373e+06	1	687700	3	933	70	1
689200	99	523000	Pakuranga East	803	Pakuranga Ward	8	Manukau City	02	Auckland Region	2.67874e+06	6.4744e+06	1	689200	5	961	35	2
2654500	51	591700	Avon Loop	6005	Hagley-Ferrymead Ward	60	Christchurch City	13	Canterbury Region	2.48045e+06	5.74275e+06	1	2654500	9	1073	23	3
2654600	21	591700	Avon Loop	6005	Hagley-Ferrymead Ward	60	Christchurch City	13	Canterbury Region	2.48072e+06	5.74275e+06	1	2654600	9	1073	9	3
2130200	81	573000	Lambton	4703	Lambton Ward	47	Wellington City	09	Wellington Region	2.65829e+06	5.98872e+06	1	2130200	7	1018	28	2
426200	159	515301	Ponsonby West	701	Western Bays Ward	7	Auckland City	02	Auckland Region	2.66449e+06	6.48215e+06	1	426200	2	910	52	1
2129500	96	573000	Lambton	4703	Lambton Ward	47	Wellington City	09	Wellington Region	2.65829e+06	5.98893e+06	1	2129500	5	967	34	2
2130400	201	573000	Lambton	4703	Lambton Ward	47	Wellington City	09	Wellington Region	2.65829e+06	5.98914e+06	1	2130400	10	1313	90	3
688200	141	523000	Pakuranga East	803	Pakuranga Ward	8	Manukau City	02	Auckland Region	2.67849e+06	6.47406e+06	1	688200	6	993	49	2
687802	27	522910	Pakuranga Central	803	Pakuranga Ward	8	Manukau City	02	Auckland Region	2.67837e+06	6.47363e+06	1	687802	4	943	9	2
2916100	39	604210	Caversham	7104	Hills Ward	71	Dunedin City	14	Otago Region	2.31384e+06	5.47648e+06	1	2916100	3	929	13	1
426000	45	515202	St Marys	701	Western Bays Ward	7	Auckland City	02	Auckland Region	2.66631e+06	6.48253e+06	1	426000	1	896	15	1
689000	141	523000	Pakuranga East	803	Pakuranga Ward	8	Manukau City	02	Auckland Region	2.67856e+06	6.47443e+06	1	689000	7	1010	49	2
425800	96	515202	St Marys	701	Western Bays Ward	7	Auckland City	02	Auckland Region	2.66623e+06	6.48271e+06	1	425800	3	928	32	1
689100	93	523000	Pakuranga East	803	Pakuranga Ward	8	Manukau City	02	Auckland Region	2.67854e+06	6.47423e+06	1	689100	5	962	33	2
687801	249	522920	Edgewater	803	Pakuranga Ward	8	Manukau City	02	Auckland Region	2.67815e+06	6.47355e+06	1	687801	4	943	87	2
1475702	147	548620	Flaxmere East	3006	Flaxmere Ward	30	Hastings District	06	Hawke's Bay Region	2.83574e+06	6.16801e+06	1	1475702	8	1037	66	3
818700	39	525910	Pukekohe North	1003	Pukekohe Ward	10	Franklin District	02	Auckland Region	2.67947e+06	6.44305e+06	1	818700	2	915	13	1
1474500	291	548612	Lochain	3006	Flaxmere Ward	30	Hastings District	06	Hawke's Bay Region	2.83468e+06	6.16862e+06	1	1474500	9	1120	131	3
557600	174	518302	Mt Eden South	703	Eden-Albert Ward	7	Auckland City	02	Auckland Region	2.66717e+06	6.47678e+06	1	557600	1	894	57	1
2917200	120	604130	Kenmure	7104	Hills Ward	71	Dunedin City	14	Otago Region	2.31348e+06	5.47689e+06	1	2917200	2	902	40	1
2917300	93	604130	Kenmure	7104	Hills Ward	71	Dunedin City	14	Otago Region	2.31372e+06	5.4769e+06	1	2917300	6	976	33	2
2785200	81	599100	Highfield	6404	Timaru Ward	64	Timaru District	13	Canterbury Region	2.36773e+06	5.64472e+06	1	2785200	3	934	27	1
2785300	90	599100	Highfield	6404	Timaru Ward	64	Timaru District	13	Canterbury Region	2.368e+06	5.64469e+06	1	2785300	6	989	31	2
688400	168	523000	Pakuranga East	803	Pakuranga Ward	8	Manukau City	02	Auckland Region	2.67863e+06	6.47387e+06	1	688400	4	937	59	2
558200	255	518302	Mt Eden South	703	Eden-Albert Ward	7	Auckland City	02	Auckland Region	2.66688e+06	6.47694e+06	1	558200	4	947	89	2
2654000	105	591700	Avon Loop	6005	Hagley-Ferrymead Ward	60	Christchurch City	13	Canterbury Region	2.48026e+06	5.74266e+06	1	2654000	6	987	37	2
2654800	210	591700	Avon Loop	6005	Hagley-Ferrymead Ward	60	Christchurch City	13	Canterbury Region	2.4807e+06	5.74258e+06	1	2654800	5	968	74	2
688900	111	523000	Pakuranga East	803	Pakuranga Ward	8	Manukau City	02	Auckland Region	2.6784e+06	6.47435e+06	1	688900	3	924	37	1
687600	204	522910	Pakuranga Central	803	Pakuranga Ward	8	Manukau City	02	Auckland Region	2.6781e+06	6.47386e+06	1	687600	4	936	71	2
688300	147	523000	Pakuranga East	803	Pakuranga Ward	8	Manukau City	02	Auckland Region	2.67844e+06	6.47387e+06	1	688300	4	950	51	2
818800	33	525910	Pukekohe North	1003	Pukekohe Ward	10	Franklin District	02	Auckland Region	2.67919e+06	6.44279e+06	1	818800	10	1206	15	3
819000	9	525910	Pukekohe North	1003	Pukekohe Ward	10	Franklin District	02	Auckland Region	2.67955e+06	6.44278e+06	1	819000	10	1206	4	3
557402	30	518302	Mt Eden South	703	Eden-Albert Ward	7	Auckland City	02	Auckland Region	2.66732e+06	6.47702e+06	1	557402	2	903	10	1
557000	150	518301	Maungawhau	703	Eden-Albert Ward	7	Auckland City	02	Auckland Region	2.66733e+06	6.47749e+06	1	557000	4	943	52	2
2785902	129	599100	Highfield	6404	Timaru Ward	64	Timaru District	13	Canterbury Region	2.36771e+06	5.64518e+06	1	2785902	3	935	43	1
688101	291	523000	Pakuranga East	803	Pakuranga Ward	8	Manukau City	02	Auckland Region	2.6782e+06	6.47401e+06	1	688101	6	981	102	2
2654700	93	591700	Avon Loop	6005	Hagley-Ferrymead Ward	60	Christchurch City	13	Canterbury Region	2.48056e+06	5.74259e+06	1	2654700	7	1026	33	2
2654900	33	591700	Avon Loop	6005	Hagley-Ferrymead Ward	60	Christchurch City	13	Canterbury Region	2.48101e+06	5.74283e+06	1	2654900	6	999	12	2
557100	123	518301	Maungawhau	703	Eden-Albert Ward	7	Auckland City	02	Auckland Region	2.66727e+06	6.47734e+06	1	557100	4	950	43	2
2130100	72	573000	Lambton	4703	Lambton Ward	47	Wellington City	09	Wellington Region	2.65834e+06	5.98881e+06	1	2130100	7	1002	25	2
2130000	72	573000	Lambton	4703	Lambton Ward	47	Wellington City	09	Wellington Region	2.65828e+06	5.98883e+06	1	2130000	7	1002	25	2
2129800	54	573000	Lambton	4703	Lambton Ward	47	Wellington City	09	Wellington Region	2.65819e+06	5.98899e+06	1	2129800	6	998	19	2
556900	267	518301	Maungawhau	703	Eden-Albert Ward	7	Auckland City	02	Auckland Region	2.667e+06	6.47738e+06	1	556900	5	958	93	2
1474102	198	548612	Lochain	3006	Flaxmere Ward	30	Hastings District	06	Hawke's Bay Region	2.83435e+06	6.16919e+06	1	1474102	10	1154	89	3
1474103	177	548612	Lochain	3006	Flaxmere Ward	30	Hastings District	06	Hawke's Bay Region	2.83485e+06	6.16921e+06	1	1474103	10	1237	80	3
1474201	72	548620	Flaxmere East	3006	Flaxmere Ward	30	Hastings District	06	Hawke's Bay Region	2.8352e+06	6.169e+06	1	1474201	10	1193	32	3
2917000	66	604130	Kenmure	7104	Hills Ward	71	Dunedin City	14	Otago Region	2.31343e+06	5.47667e+06	1	2917000	2	901	22	1
2917102	63	604130	Kenmure	7104	Hills Ward	71	Dunedin City	14	Otago Region	2.31362e+06	5.47675e+06	1	2917102	2	901	21	1
558000	288	518302	Mt Eden South	703	Eden-Albert Ward	7	Auckland City	02	Auckland Region	2.66691e+06	6.47709e+06	1	558000	3	928	95	1
557800	201	518301	Maungawhau	703	Eden-Albert Ward	7	Auckland City	02	Auckland Region	2.66693e+06	6.47724e+06	1	557800	2	910	66	1
688000	165	523000	Pakuranga East	803	Pakuranga Ward	8	Manukau City	02	Auckland Region	2.67822e+06	6.47426e+06	1	688000	3	926	54	1
557401	135	518302	Mt Eden South	703	Eden-Albert Ward	7	Auckland City	02	Auckland Region	2.66723e+06	6.47711e+06	1	557401	2	903	45	1
557300	102	518301	Maungawhau	703	Eden-Albert Ward	7	Auckland City	02	Auckland Region	2.66729e+06	6.47719e+06	1	557300	1	859	34	1
688700	96	523000	Pakuranga East	803	Pakuranga Ward	8	Manukau City	02	Auckland Region	2.67826e+06	6.47466e+06	1	688700	3	923	32	1
2129700	183	573000	Lambton	4703	Lambton Ward	47	Wellington City	09	Wellington Region	2.65843e+06	5.98894e+06	1	2129700	6	988	64	2
2130800	42	573101	Willis Street-Cambridge Terrace	4703	Lambton Ward	47	Wellington City	09	Wellington Region	2.65871e+06	5.98939e+06	1	2130800	6	977	15	2
1475300	180	548620	Flaxmere East	3006	Flaxmere Ward	30	Hastings District	06	Hawke's Bay Region	2.8354e+06	6.16813e+06	1	1475300	10	1161	81	3
426500	138	515301	Ponsonby West	701	Western Bays Ward	7	Auckland City	02	Auckland Region	2.66498e+06	6.48217e+06	1	426500	3	935	46	1
687900	174	523000	Pakuranga East	803	Pakuranga Ward	8	Manukau City	02	Auckland Region	2.67823e+06	6.47443e+06	1	687900	3	923	57	1
2523400	231	588700	Bishopdale	6002	Fendalton-Waimairi Ward	60	Christchurch City	13	Canterbury Region	2.47689e+06	5.74632e+06	1	2523400	5	971	81	2
2915800	90	604210	Caversham	7104	Hills Ward	71	Dunedin City	14	Otago Region	2.31323e+06	5.4765e+06	1	2915800	3	929	30	1
2653900	102	591700	Avon Loop	6005	Hagley-Ferrymead Ward	60	Christchurch City	13	Canterbury Region	2.48026e+06	5.74275e+06	1	2653900	5	964	36	2
426100	342	515202	St Marys	701	Western Bays Ward	7	Auckland City	02	Auckland Region	2.66651e+06	6.48236e+06	1	426100	3	928	113	1
557200	108	518301	Maungawhau	703	Eden-Albert Ward	7	Auckland City	02	Auckland Region	2.66742e+06	6.47735e+06	1	557200	3	918	36	1
2130500	156	573000	Lambton	4703	Lambton Ward	47	Wellington City	09	Wellington Region	2.65833e+06	5.98912e+06	1	2130500	6	988	55	2
2130700	75	573000	Lambton	4703	Lambton Ward	47	Wellington City	09	Wellington Region	2.65849e+06	5.98911e+06	1	2130700	6	988	26	2
2131000	15	573101	Willis Street-Cambridge Terrace	4703	Lambton Ward	47	Wellington City	09	Wellington Region	2.65868e+06	5.98931e+06	1	2131000	10	1176	7	3
820200	150	525910	Pukekohe North	1003	Pukekohe Ward	10	Franklin District	02	Auckland Region	2.67883e+06	6.44324e+06	1	820200	10	1346	68	3
1474400	240	548612	Lochain	3006	Flaxmere Ward	30	Hastings District	06	Hawke's Bay Region	2.83455e+06	6.1688e+06	1	1474400	9	1090	108	3
425900	63	515202	St Marys	701	Western Bays Ward	7	Auckland City	02	Auckland Region	2.66644e+06	6.48265e+06	1	425900	1	896	21	1
2916400	105	604210	Caversham	7106	South Dunedin Ward	71	Dunedin City	14	Otago Region	2.31336e+06	5.47616e+06	1	2916400	7	1012	37	2
2916200	66	604210	Caversham	7106	South Dunedin Ward	71	Dunedin City	14	Otago Region	2.31383e+06	5.47627e+06	1	2916200	3	929	22	1
2788000	99	599100	Highfield	6404	Timaru Ward	64	Timaru District	13	Canterbury Region	2.36861e+06	5.64495e+06	1	2788000	2	901	33	1
2658200	3	594700	Addington	6006	Spreydon-Heathcote Ward	60	Christchurch City	13	Canterbury Region	2.47951e+06	5.74073e+06	1	2658200	7	1024	1	2
2134000	3	573101	Willis Street-Cambridge Terrace	4703	Lambton Ward	47	Wellington City	09	Wellington Region	2.65867e+06	5.9886e+06	1	2134000	7	1028	1	2
2134300	18	573101	Willis Street-Cambridge Terrace	4703	Lambton Ward	47	Wellington City	09	Wellington Region	2.65863e+06	5.98867e+06	1	2134300	7	1028	6	2
2133800	15	573101	Willis Street-Cambridge Terrace	4703	Lambton Ward	47	Wellington City	09	Wellington Region	2.65887e+06	5.98863e+06	1	2133800	7	1003	5	2
430000	57	515302	Ponsonby East	701	Western Bays Ward	7	Auckland City	02	Auckland Region	2.66583e+06	6.48214e+06	1	430000	5	962	20	2
823402	447	525922	Bledisloe Park	1003	Pukekohe Ward	10	Franklin District	02	Auckland Region	2.67926e+06	6.44127e+06	1	823402	2	907	148	1
822406	129	525921	Pukekohe West	1003	Pukekohe Ward	10	Franklin District	02	Auckland Region	2.67875e+06	6.44159e+06	1	822406	5	973	45	2
822407	132	525921	Pukekohe West	1003	Pukekohe Ward	10	Franklin District	02	Auckland Region	2.67889e+06	6.44149e+06	1	822407	7	1010	46	2
822402	414	525921	Pukekohe West	1003	Pukekohe Ward	10	Franklin District	02	Auckland Region	2.67855e+06	6.44132e+06	1	822402	1	894	137	1
823401	195	525922	Bledisloe Park	1003	Pukekohe Ward	10	Franklin District	02	Auckland Region	2.67918e+06	6.44151e+06	1	823401	4	944	68	2
822408	96	525921	Pukekohe West	1003	Pukekohe Ward	10	Franklin District	02	Auckland Region	2.67874e+06	6.44138e+06	1	822408	5	973	34	2
1478800	84	548500	Camberley	3005	Hastings Ward	30	Hastings District	06	Hawke's Bay Region	2.8385e+06	6.16792e+06	1	1478800	8	1058	38	3
560100	246	518500	Three Kings	702	Avondale-Roskill Ward	7	Auckland City	02	Auckland Region	2.66569e+06	6.47673e+06	1	560100	7	1019	86	2
1478200	189	548500	Camberley	3005	Hastings Ward	30	Hastings District	06	Hawke's Bay Region	2.83731e+06	6.16856e+06	1	1478200	10	1337	85	3
1477200	78	547800	Frimley	3005	Hastings Ward	30	Hastings District	06	Hawke's Bay Region	2.83853e+06	6.1686e+06	1	1477200	4	938	27	2
1477600	72	547800	Frimley	3005	Hastings Ward	30	Hastings District	06	Hawke's Bay Region	2.83938e+06	6.16849e+06	1	1477600	8	1041	32	3
1478900	72	548500	Camberley	3005	Hastings Ward	30	Hastings District	06	Hawke's Bay Region	2.83747e+06	6.16862e+06	1	1478900	10	1365	32	3
1478400	60	548500	Camberley	3005	Hastings Ward	30	Hastings District	06	Hawke's Bay Region	2.83767e+06	6.16835e+06	1	1478400	9	1075	27	3
561400	102	518500	Three Kings	702	Avondale-Roskill Ward	7	Auckland City	02	Auckland Region	2.66593e+06	6.47665e+06	1	561400	4	947	36	2
2919200	78	604110	Mornington	7104	Hills Ward	71	Dunedin City	14	Otago Region	2.31388e+06	5.47689e+06	1	2919200	3	924	26	1
2527401	144	588500	Kaimahi	6002	Fendalton-Waimairi Ward	60	Christchurch City	13	Canterbury Region	2.4761e+06	5.74759e+06	1	2527401	1	894	48	1
2525800	99	588500	Kaimahi	6002	Fendalton-Waimairi Ward	60	Christchurch City	13	Canterbury Region	2.47671e+06	5.74709e+06	1	2525800	4	948	35	2
2788300	114	599400	Fraser Park	6404	Timaru Ward	64	Timaru District	13	Canterbury Region	2.36886e+06	5.64473e+06	1	2788300	4	952	40	2
2788100	42	599400	Fraser Park	6404	Timaru Ward	64	Timaru District	13	Canterbury Region	2.36844e+06	5.6447e+06	1	2788100	2	914	14	1
430400	66	515302	Ponsonby East	701	Western Bays Ward	7	Auckland City	02	Auckland Region	2.66584e+06	6.48194e+06	1	430400	3	925	22	1
2133600	129	573101	Willis Street-Cambridge Terrace	4703	Lambton Ward	47	Wellington City	09	Wellington Region	2.65871e+06	5.98876e+06	1	2133600	6	995	45	2
691200	228	522810	Pakuranga North	803	Pakuranga Ward	8	Manukau City	02	Auckland Region	2.6787e+06	6.47568e+06	1	691200	5	964	80	2
2525210	159	588500	Kaimahi	6002	Fendalton-Waimairi Ward	60	Christchurch City	13	Canterbury Region	2.47727e+06	5.74701e+06	1	2525210	8	1044	72	3
2787100	147	599100	Highfield	6404	Timaru Ward	64	Timaru District	13	Canterbury Region	2.36889e+06	5.64528e+06	1	2787100	7	1006	51	2
690000	174	523000	Pakuranga East	803	Pakuranga Ward	8	Manukau City	02	Auckland Region	2.67856e+06	6.47479e+06	1	690000	1	888	57	1
2132500	12	573101	Willis Street-Cambridge Terrace	4703	Lambton Ward	47	Wellington City	09	Wellington Region	2.65846e+06	5.98855e+06	1	2132500	8	1061	5	3
2525205	198	588500	Kaimahi	6002	Fendalton-Waimairi Ward	60	Christchurch City	13	Canterbury Region	2.47715e+06	5.74681e+06	1	2525205	6	989	69	2
559400	213	518302	Mt Eden South	703	Eden-Albert Ward	7	Auckland City	02	Auckland Region	2.66609e+06	6.47693e+06	1	559400	5	963	75	2
[truncated: 5,442 more rows]
