# Supplementary material for: Optimising locational access of deprived populations to farmers’ markets at a national scale: one route to improved fruit and vegetable consumption?
Source: PeerJ. 2013 Jul 2;1:e94. doi: 10.7717/peerj.94 (PMC3709110; doi:10.7717/peerj.94)
Supplement: Supplemental Information 8 [file peerj-01-94-s008.xlsx]

## Sheet: Pop_Scenario2_2kBuffer
MB2006	MBUR_POP20	CAU2006	CAU_DESCR	WARD_COD	WARD_DES	TA_CODE	TA_DESC	RC_COD	RC_DESC	POINT_X	POINT_Y	Cnt_MB2006	MB2006_1	NZDep2006	NZDep_scor	Weight	DepCat
1704700	93	556800	Laird Park	3702	Urban Ward	37	Wanganui District	08	Manawatu-Wanganui Region	2.68507e+06	6.14064e+06	1	1704700	10	1200	42	3
2097300	42	574402	Ngaio	4702	Onslow-Western Ward	47	Wellington City	09	Wellington Region	2.65925e+06	5.99335e+06	1	2097300	2	904	14	1
2097504	33	574402	Ngaio	4702	Onslow-Western Ward	47	Wellington City	09	Wellington Region	2.65916e+06	5.99331e+06	1	2097504	1	877	11	1
787900	24	521802	Fairburn	706	Tamaki-Maungakiekie Ward	7	Auckland City	02	Auckland Region	2.67497e+06	6.47149e+06	1	787900	10	1152	11	3
1704500	75	556800	Laird Park	3702	Urban Ward	37	Wanganui District	08	Manawatu-Wanganui Region	2.68512e+06	6.14079e+06	1	1704500	10	1219	34	3
1704300	84	556800	Laird Park	3702	Urban Ward	37	Wanganui District	08	Manawatu-Wanganui Region	2.68498e+06	6.14087e+06	1	1704300	10	1162	38	3
1203203	105	536810	Mt Maunganui North	2301	Mount Maunganui-Papamoa Ward	23	Tauranga City	04	Bay of Plenty Region	2.79154e+06	6.38985e+06	1	1203203	8	1066	47	3
1705200	33	556800	Laird Park	3702	Urban Ward	37	Wanganui District	08	Manawatu-Wanganui Region	2.68518e+06	6.14123e+06	1	1705200	8	1058	15	3
2097200	120	574402	Ngaio	4702	Onslow-Western Ward	47	Wellington City	09	Wellington Region	2.65895e+06	5.99331e+06	1	2097200	1	882	40	1
1705500	72	556800	Laird Park	3702	Urban Ward	37	Wanganui District	08	Manawatu-Wanganui Region	2.68511e+06	6.14106e+06	1	1705500	8	1052	32	3
1704200	72	556800	Laird Park	3702	Urban Ward	37	Wanganui District	08	Manawatu-Wanganui Region	2.68505e+06	6.14096e+06	1	1704200	9	1109	32	3
787800	117	521802	Fairburn	706	Tamaki-Maungakiekie Ward	7	Auckland City	02	Auckland Region	2.67477e+06	6.47147e+06	1	787800	10	1165	53	3
1203205	87	536810	Mt Maunganui North	2301	Mount Maunganui-Papamoa Ward	23	Tauranga City	04	Bay of Plenty Region	2.79167e+06	6.38995e+06	1	1203205	9	1110	39	3
1704600	30	556800	Laird Park	3702	Urban Ward	37	Wanganui District	08	Manawatu-Wanganui Region	2.6852e+06	6.14072e+06	1	1704600	10	1200	14	3
789200	144	521802	Fairburn	706	Tamaki-Maungakiekie Ward	7	Auckland City	02	Auckland Region	2.67526e+06	6.47087e+06	1	789200	9	1131	65	3
2623200	126	594600	Sydenham	6006	Spreydon-Heathcote Ward	60	Christchurch City	13	Canterbury Region	2.48152e+06	5.73918e+06	1	2623200	6	988	44	2
526700	81	517800	Mt Albert Central	703	Eden-Albert Ward	7	Auckland City	02	Auckland Region	2.66403e+06	6.47894e+06	1	526700	6	994	28	2
789600	213	521802	Fairburn	706	Tamaki-Maungakiekie Ward	7	Auckland City	02	Auckland Region	2.67499e+06	6.47038e+06	1	789600	9	1115	96	3
789500	174	521802	Fairburn	706	Tamaki-Maungakiekie Ward	7	Auckland City	02	Auckland Region	2.67498e+06	6.4706e+06	1	789500	9	1110	78	3
788602	192	521802	Fairburn	706	Tamaki-Maungakiekie Ward	7	Auckland City	02	Auckland Region	2.67503e+06	6.4712e+06	1	788602	8	1068	86	3
789300	141	521802	Fairburn	706	Tamaki-Maungakiekie Ward	7	Auckland City	02	Auckland Region	2.67488e+06	6.47093e+06	1	789300	10	1186	63	3
526600	213	517800	Mt Albert Central	703	Eden-Albert Ward	7	Auckland City	02	Auckland Region	2.66399e+06	6.47882e+06	1	526600	5	973	75	2
789400	273	521802	Fairburn	706	Tamaki-Maungakiekie Ward	7	Auckland City	02	Auckland Region	2.67481e+06	6.47068e+06	1	789400	9	1098	123	3
788601	189	521802	Fairburn	706	Tamaki-Maungakiekie Ward	7	Auckland City	02	Auckland Region	2.67479e+06	6.47117e+06	1	788601	10	1415	85	3
2623100	69	594600	Sydenham	6006	Spreydon-Heathcote Ward	60	Christchurch City	13	Canterbury Region	2.48163e+06	5.73929e+06	1	2623100	6	988	24	2
527100	123	517800	Mt Albert Central	703	Eden-Albert Ward	7	Auckland City	02	Auckland Region	2.66408e+06	6.47863e+06	1	527100	6	992	43	2
789100	234	521802	Fairburn	706	Tamaki-Maungakiekie Ward	7	Auckland City	02	Auckland Region	2.67507e+06	6.47084e+06	1	789100	9	1075	105	3
529800	105	517500	Kingsland	703	Eden-Albert Ward	7	Auckland City	02	Auckland Region	2.66604e+06	6.47969e+06	1	529800	10	1163	47	3
528000	111	517800	Mt Albert Central	703	Eden-Albert Ward	7	Auckland City	02	Auckland Region	2.66435e+06	6.47868e+06	1	528000	9	1095	50	3
2626400	126	594400	St Martins	6006	Spreydon-Heathcote Ward	60	Christchurch City	13	Canterbury Region	2.48228e+06	5.73846e+06	1	2626400	3	930	42	1
2625100	174	594400	St Martins	6006	Spreydon-Heathcote Ward	60	Christchurch City	13	Canterbury Region	2.48181e+06	5.73876e+06	1	2625100	3	920	57	1
2625500	93	594400	St Martins	6006	Spreydon-Heathcote Ward	60	Christchurch City	13	Canterbury Region	2.48214e+06	5.73845e+06	1	2625500	3	920	31	1
2624900	180	594400	St Martins	6006	Spreydon-Heathcote Ward	60	Christchurch City	13	Canterbury Region	2.48169e+06	5.739e+06	1	2624900	4	937	63	2
2626000	156	594400	St Martins	6006	Spreydon-Heathcote Ward	60	Christchurch City	13	Canterbury Region	2.48206e+06	5.73899e+06	1	2626000	3	932	51	1
529200	156	517500	Kingsland	703	Eden-Albert Ward	7	Auckland City	02	Auckland Region	2.66644e+06	6.48011e+06	1	529200	5	969	55	2
2625300	102	594400	St Martins	6006	Spreydon-Heathcote Ward	60	Christchurch City	13	Canterbury Region	2.48204e+06	5.73865e+06	1	2625300	3	920	34	1
2625800	168	594400	St Martins	6006	Spreydon-Heathcote Ward	60	Christchurch City	13	Canterbury Region	2.48212e+06	5.73928e+06	1	2625800	5	966	59	2
528201	129	517800	Mt Albert Central	703	Eden-Albert Ward	7	Auckland City	02	Auckland Region	2.66441e+06	6.47857e+06	1	528201	7	1002	45	2
2625200	99	594400	St Martins	6006	Spreydon-Heathcote Ward	60	Christchurch City	13	Canterbury Region	2.4819e+06	5.73859e+06	1	2625200	6	988	35	2
2626200	117	594400	St Martins	6006	Spreydon-Heathcote Ward	60	Christchurch City	13	Canterbury Region	2.48233e+06	5.73887e+06	1	2626200	2	909	39	1
2625700	120	594400	St Martins	6006	Spreydon-Heathcote Ward	60	Christchurch City	13	Canterbury Region	2.48191e+06	5.7392e+06	1	2625700	7	1009	42	2
2625900	210	594400	St Martins	6006	Spreydon-Heathcote Ward	60	Christchurch City	13	Canterbury Region	2.48228e+06	5.73915e+06	1	2625900	3	921	69	1
528100	102	517800	Mt Albert Central	703	Eden-Albert Ward	7	Auckland City	02	Auckland Region	2.66421e+06	6.47858e+06	1	528100	4	941	36	2
529000	57	517500	Kingsland	703	Eden-Albert Ward	7	Auckland City	02	Auckland Region	2.66656e+06	6.48017e+06	1	529000	4	950	20	2
529300	135	517500	Kingsland	703	Eden-Albert Ward	7	Auckland City	02	Auckland Region	2.6663e+06	6.48003e+06	1	529300	7	1004	47	2
529100	51	517500	Kingsland	703	Eden-Albert Ward	7	Auckland City	02	Auckland Region	2.6665e+06	6.48017e+06	1	529100	4	950	18	2
2626300	99	594400	St Martins	6006	Spreydon-Heathcote Ward	60	Christchurch City	13	Canterbury Region	2.48223e+06	5.73872e+06	1	2626300	8	1031	45	3
2626100	117	594400	St Martins	6006	Spreydon-Heathcote Ward	60	Christchurch City	13	Canterbury Region	2.48231e+06	5.73897e+06	1	2626100	4	947	41	2
372104	177	514600	Avondale South	702	Avondale-Roskill Ward	7	Auckland City	02	Auckland Region	2.66191e+06	6.4752e+06	1	372104	6	990	62	2
2625000	93	594400	St Martins	6006	Spreydon-Heathcote Ward	60	Christchurch City	13	Canterbury Region	2.48183e+06	5.73896e+06	1	2625000	6	988	33	2
2891300	174	603500	Woodhaugh	7103	Cargill Ward	71	Dunedin City	14	Otago Region	2.31668e+06	5.48059e+06	1	2891300	9	1105	78	3
530500	153	517500	Kingsland	703	Eden-Albert Ward	7	Auckland City	02	Auckland Region	2.66579e+06	6.47967e+06	1	530500	4	943	54	2
531100	144	517500	Kingsland	703	Eden-Albert Ward	7	Auckland City	02	Auckland Region	2.66642e+06	6.47957e+06	1	531100	7	1001	50	2
530600	156	517500	Kingsland	703	Eden-Albert Ward	7	Auckland City	02	Auckland Region	2.66548e+06	6.47952e+06	1	530600	7	1020	55	2
529700	45	517500	Kingsland	703	Eden-Albert Ward	7	Auckland City	02	Auckland Region	2.66618e+06	6.47981e+06	1	529700	10	1163	20	3
530300	174	517500	Kingsland	703	Eden-Albert Ward	7	Auckland City	02	Auckland Region	2.66577e+06	6.47975e+06	1	530300	6	995	61	2
530900	12	517500	Kingsland	703	Eden-Albert Ward	7	Auckland City	02	Auckland Region	2.66641e+06	6.47986e+06	1	530900	5	953	4	2
529500	114	517500	Kingsland	703	Eden-Albert Ward	7	Auckland City	02	Auckland Region	2.66641e+06	6.47995e+06	1	529500	6	978	40	2
529600	93	517500	Kingsland	703	Eden-Albert Ward	7	Auckland City	02	Auckland Region	2.66622e+06	6.47993e+06	1	529600	4	950	33	2
530100	114	517500	Kingsland	703	Eden-Albert Ward	7	Auckland City	02	Auckland Region	2.66576e+06	6.47983e+06	1	530100	3	927	38	1
531000	51	517500	Kingsland	703	Eden-Albert Ward	7	Auckland City	02	Auckland Region	2.66646e+06	6.47976e+06	1	531000	8	1039	23	3
530200	183	517500	Kingsland	703	Eden-Albert Ward	7	Auckland City	02	Auckland Region	2.66546e+06	6.47972e+06	1	530200	7	1009	64	2
529400	6	517500	Kingsland	703	Eden-Albert Ward	7	Auckland City	02	Auckland Region	2.66665e+06	6.48005e+06	1	529400	6	978	2	2
661100	291	522201	Papatoetoe North	802	Papatoetoe Ward	8	Manukau City	02	Auckland Region	2.6756e+06	6.46873e+06	1	661100	7	1015	102	2
530400	132	517500	Kingsland	703	Eden-Albert Ward	7	Auckland City	02	Auckland Region	2.66549e+06	6.47962e+06	1	530400	7	1002	46	2
530700	87	517500	Kingsland	703	Eden-Albert Ward	7	Auckland City	02	Auckland Region	2.66571e+06	6.47956e+06	1	530700	6	981	30	2
530800	48	517500	Kingsland	703	Eden-Albert Ward	7	Auckland City	02	Auckland Region	2.66587e+06	6.47962e+06	1	530800	3	927	16	1
402700	108	515410	Grey Lynn West	701	Western Bays Ward	7	Auckland City	02	Auckland Region	2.6654e+06	6.48145e+06	1	402700	4	940	38	2
402500	141	515410	Grey Lynn West	701	Western Bays Ward	7	Auckland City	02	Auckland Region	2.66492e+06	6.48122e+06	1	402500	4	940	49	2
403500	114	515410	Grey Lynn West	701	Western Bays Ward	7	Auckland City	02	Auckland Region	2.66502e+06	6.48116e+06	1	403500	5	956	40	2
534700	138	517600	St Lukes	703	Eden-Albert Ward	7	Auckland City	02	Auckland Region	2.66507e+06	6.47916e+06	1	534700	7	1013	48	2
663900	219	522202	Papatoetoe Central	802	Papatoetoe Ward	8	Manukau City	02	Auckland Region	2.67611e+06	6.46788e+06	1	663900	7	1020	77	2
2629600	117	595300	Hillmorton	6006	Spreydon-Heathcote Ward	60	Christchurch City	13	Canterbury Region	2.47643e+06	5.73885e+06	1	2629600	2	899	39	1
531800	18	517500	Kingsland	703	Eden-Albert Ward	7	Auckland City	02	Auckland Region	2.66582e+06	6.47955e+06	1	531800	8	1045	8	3
2630000	90	595300	Hillmorton	6006	Spreydon-Heathcote Ward	60	Christchurch City	13	Canterbury Region	2.4766e+06	5.73874e+06	1	2630000	6	982	31	2
532200	93	517500	Kingsland	703	Eden-Albert Ward	7	Auckland City	02	Auckland Region	2.6655e+06	6.47929e+06	1	532200	4	946	33	2
2629200	3	590300	Middleton	6006	Spreydon-Heathcote Ward	60	Christchurch City	13	Canterbury Region	2.47672e+06	5.73955e+06	1	2629200	4	942	1	2
532100	288	517500	Kingsland	703	Eden-Albert Ward	7	Auckland City	02	Auckland Region	2.66544e+06	6.47934e+06	1	532100	4	946	101	2
532700	114	517500	Kingsland	703	Eden-Albert Ward	7	Auckland City	02	Auckland Region	2.66522e+06	6.47909e+06	1	532700	3	929	38	1
438216	318	514101	Auckland Harbourside	704	Hobson Ward	7	Auckland City	02	Auckland Region	2.66871e+06	6.4821e+06	1	438216	7	1029	111	2
532000	93	517500	Kingsland	703	Eden-Albert Ward	7	Auckland City	02	Auckland Region	2.66542e+06	6.47943e+06	1	532000	8	1045	42	3
532600	141	517500	Kingsland	703	Eden-Albert Ward	7	Auckland City	02	Auckland Region	2.66546e+06	6.47918e+06	1	532600	3	929	47	1
2891202	36	603500	Woodhaugh	7103	Cargill Ward	71	Dunedin City	14	Otago Region	2.31674e+06	5.48066e+06	1	2891202	6	993	13	2
532800	99	517500	Kingsland	703	Eden-Albert Ward	7	Auckland City	02	Auckland Region	2.66548e+06	6.47908e+06	1	532800	4	950	35	2
438104	33	514103	Auckland Central East	704	Hobson Ward	7	Auckland City	02	Auckland Region	2.66812e+06	6.48248e+06	1	438104	8	1060	15	3
532900	114	517500	Kingsland	703	Eden-Albert Ward	7	Auckland City	02	Auckland Region	2.66545e+06	6.47898e+06	1	532900	4	950	40	2
663600	186	522202	Papatoetoe Central	802	Papatoetoe Ward	8	Manukau City	02	Auckland Region	2.67587e+06	6.46827e+06	1	663600	7	1029	65	2
662400	6	522201	Papatoetoe North	802	Papatoetoe Ward	8	Manukau City	02	Auckland Region	2.67595e+06	6.46858e+06	1	662400	9	1079	3	3
2629300	165	595300	Hillmorton	6006	Spreydon-Heathcote Ward	60	Christchurch City	13	Canterbury Region	2.47685e+06	5.73901e+06	1	2629300	5	957	58	2
531900	87	517500	Kingsland	703	Eden-Albert Ward	7	Auckland City	02	Auckland Region	2.66565e+06	6.47949e+06	1	531900	8	1045	39	3
531300	6	517500	Kingsland	703	Eden-Albert Ward	7	Auckland City	02	Auckland Region	2.66604e+06	6.47961e+06	1	531300	5	953	2	2
438212	222	514101	Auckland Harbourside	704	Hobson Ward	7	Auckland City	02	Auckland Region	2.66835e+06	6.48252e+06	1	438212	7	1030	78	2
532300	108	517500	Kingsland	703	Eden-Albert Ward	7	Auckland City	02	Auckland Region	2.66603e+06	6.47934e+06	1	532300	6	997	38	2
2629900	51	595300	Hillmorton	6006	Spreydon-Heathcote Ward	60	Christchurch City	13	Canterbury Region	2.47629e+06	5.73871e+06	1	2629900	3	929	17	1
138102	135	506615	Cape Rodney	401	Northern Ward	4	Rodney District	02	Auckland Region	2.66438e+06	6.53735e+06	1	138102	3	927	45	1
531200	156	517500	Kingsland	703	Eden-Albert Ward	7	Auckland City	02	Auckland Region	2.66622e+06	6.4796e+06	1	531200	8	1039	70	3
531400	165	517500	Kingsland	703	Eden-Albert Ward	7	Auckland City	02	Auckland Region	2.666e+06	6.47945e+06	1	531400	5	953	58	2
662300	240	522201	Papatoetoe North	802	Papatoetoe Ward	8	Manukau City	02	Auckland Region	2.67578e+06	6.46866e+06	1	662300	8	1056	108	3
138202	48	506615	Cape Rodney	401	Northern Ward	4	Rodney District	02	Auckland Region	2.66572e+06	6.53852e+06	1	138202	5	960	17	2
2891201	15	603500	Woodhaugh	7104	Hills Ward	71	Dunedin City	14	Otago Region	2.31636e+06	5.48086e+06	1	2891201	6	993	5	2
138203	69	506615	Cape Rodney	401	Northern Ward	4	Rodney District	02	Auckland Region	2.66441e+06	6.53766e+06	1	138203	3	927	23	1
2629700	111	595300	Hillmorton	6006	Spreydon-Heathcote Ward	60	Christchurch City	13	Canterbury Region	2.4765e+06	5.73894e+06	1	2629700	4	941	39	2
534601	180	517600	St Lukes	703	Eden-Albert Ward	7	Auckland City	02	Auckland Region	2.66493e+06	6.47939e+06	1	534601	5	954	63	2
2631300	174	595300	Hillmorton	6006	Spreydon-Heathcote Ward	60	Christchurch City	13	Canterbury Region	2.47687e+06	5.7388e+06	1	2631300	8	1039	78	3
402400	159	515410	Grey Lynn West	701	Western Bays Ward	7	Auckland City	02	Auckland Region	2.66486e+06	6.48129e+06	1	402400	1	893	52	1
534002	78	517600	St Lukes	703	Eden-Albert Ward	7	Auckland City	02	Auckland Region	2.6644e+06	6.47918e+06	1	534002	5	965	27	2
2762800	168	598500	Geraldine	6401	Geraldine Ward	64	Timaru District	13	Canterbury Region	2.36963e+06	5.67856e+06	1	2762800	4	950	59	2
2762700	111	598500	Geraldine	6401	Geraldine Ward	64	Timaru District	13	Canterbury Region	2.36976e+06	5.67889e+06	1	2762700	7	1009	39	2
2448212	42	586305	Kingsbury	5903	Rangiora Ward	59	Waimakariri District	13	Canterbury Region	2.47623e+06	5.76793e+06	1	2448212	2	901	14	1
2631700	198	595300	Hillmorton	6006	Spreydon-Heathcote Ward	60	Christchurch City	13	Canterbury Region	2.47712e+06	5.73898e+06	1	2631700	6	987	69	2
402600	123	515410	Grey Lynn West	701	Western Bays Ward	7	Auckland City	02	Auckland Region	2.66525e+06	6.48141e+06	1	402600	2	917	41	1
2631400	159	595300	Hillmorton	6006	Spreydon-Heathcote Ward	60	Christchurch City	13	Canterbury Region	2.47684e+06	5.73857e+06	1	2631400	10	1180	72	3
2630200	87	595300	Hillmorton	6006	Spreydon-Heathcote Ward	60	Christchurch City	13	Canterbury Region	2.4764e+06	5.73858e+06	1	2630200	6	982	30	2
2630400	204	595300	Hillmorton	6006	Spreydon-Heathcote Ward	60	Christchurch City	13	Canterbury Region	2.47647e+06	5.7385e+06	1	2630400	6	996	71	2
534200	54	517600	St Lukes	703	Eden-Albert Ward	7	Auckland City	02	Auckland Region	2.66422e+06	6.47906e+06	1	534200	5	971	19	2
403400	114	515410	Grey Lynn West	701	Western Bays Ward	7	Auckland City	02	Auckland Region	2.66499e+06	6.48122e+06	1	403400	3	927	38	1
403600	195	515410	Grey Lynn West	701	Western Bays Ward	7	Auckland City	02	Auckland Region	2.66512e+06	6.48112e+06	1	403600	6	981	68	2
534500	186	517600	St Lukes	703	Eden-Albert Ward	7	Auckland City	02	Auckland Region	2.66479e+06	6.47928e+06	1	534500	6	975	65	2
403000	114	515431	Surrey Crescent	701	Western Bays Ward	7	Auckland City	02	Auckland Region	2.66464e+06	6.48095e+06	1	403000	2	911	38	1
403200	156	515431	Surrey Crescent	701	Western Bays Ward	7	Auckland City	02	Auckland Region	2.66461e+06	6.48074e+06	1	403200	2	914	51	1
534300	105	517600	St Lukes	703	Eden-Albert Ward	7	Auckland City	02	Auckland Region	2.66429e+06	6.47895e+06	1	534300	5	971	37	2
534602	9	517600	St Lukes	703	Eden-Albert Ward	7	Auckland City	02	Auckland Region	2.66505e+06	6.47932e+06	1	534602	2	908	3	1
665101	150	522202	Papatoetoe Central	802	Papatoetoe Ward	8	Manukau City	02	Auckland Region	2.67638e+06	6.46795e+06	1	665101	8	1070	68	3
2631000	123	595300	Hillmorton	6006	Spreydon-Heathcote Ward	60	Christchurch City	13	Canterbury Region	2.4768e+06	5.7384e+06	1	2631000	10	1193	55	3
2631800	96	595300	Hillmorton	6006	Spreydon-Heathcote Ward	60	Christchurch City	13	Canterbury Region	2.47739e+06	5.73904e+06	1	2631800	5	955	34	2
403100	156	515431	Surrey Crescent	701	Western Bays Ward	7	Auckland City	02	Auckland Region	2.66474e+06	6.48091e+06	1	403100	3	928	51	1
665102	204	522202	Papatoetoe Central	802	Papatoetoe Ward	8	Manukau City	02	Auckland Region	2.67627e+06	6.46781e+06	1	665102	8	1059	92	3
533700	90	517600	St Lukes	703	Eden-Albert Ward	7	Auckland City	02	Auckland Region	2.66523e+06	6.47946e+06	1	533700	5	959	31	2
534400	198	517600	St Lukes	703	Eden-Albert Ward	7	Auckland City	02	Auckland Region	2.66447e+06	6.47904e+06	1	534400	7	1000	69	2
405900	57	515431	Surrey Crescent	701	Western Bays Ward	7	Auckland City	02	Auckland Region	2.66494e+06	6.48042e+06	1	405900	8	1050	26	3
2765000	75	598500	Geraldine	6401	Geraldine Ward	64	Timaru District	13	Canterbury Region	2.36937e+06	5.6765e+06	1	2765000	4	947	26	2
667400	123	522301	Dingwall	802	Papatoetoe Ward	8	Manukau City	02	Auckland Region	2.67638e+06	6.46822e+06	1	667400	7	1027	43	2
404000	150	515431	Surrey Crescent	701	Western Bays Ward	7	Auckland City	02	Auckland Region	2.66482e+06	6.48082e+06	1	404000	4	951	52	2
666301	30	522301	Dingwall	802	Papatoetoe Ward	8	Manukau City	02	Auckland Region	2.67616e+06	6.46887e+06	1	666301	7	1002	10	2
665800	111	522301	Dingwall	802	Papatoetoe Ward	8	Manukau City	02	Auckland Region	2.67566e+06	6.46907e+06	1	665800	6	991	39	2
535100	165	517600	St Lukes	703	Eden-Albert Ward	7	Auckland City	02	Auckland Region	2.66468e+06	6.47881e+06	1	535100	6	990	58	2
2633300	81	595100	Hoon Hay	6006	Spreydon-Heathcote Ward	60	Christchurch City	13	Canterbury Region	2.47784e+06	5.73855e+06	1	2633300	5	962	28	2
2632900	120	595100	Hoon Hay	6006	Spreydon-Heathcote Ward	60	Christchurch City	13	Canterbury Region	2.47749e+06	5.73853e+06	1	2632900	6	996	42	2
2631900	231	595300	Hillmorton	6006	Spreydon-Heathcote Ward	60	Christchurch City	13	Canterbury Region	2.4774e+06	5.7387e+06	1	2631900	5	960	81	2
405100	99	515431	Surrey Crescent	701	Western Bays Ward	7	Auckland City	02	Auckland Region	2.66474e+06	6.48054e+06	1	405100	8	1040	45	3
534900	75	517600	St Lukes	703	Eden-Albert Ward	7	Auckland City	02	Auckland Region	2.66456e+06	6.4789e+06	1	534900	7	1010	26	2
2763500	114	598500	Geraldine	6401	Geraldine Ward	64	Timaru District	13	Canterbury Region	2.36922e+06	5.67853e+06	1	2763500	3	929	38	1
2763000	111	598500	Geraldine	6401	Geraldine Ward	64	Timaru District	13	Canterbury Region	2.36957e+06	5.67878e+06	1	2763000	6	981	39	2
2763600	81	598500	Geraldine	6401	Geraldine Ward	64	Timaru District	13	Canterbury Region	2.36905e+06	5.67813e+06	1	2763600	7	1022	28	2
666800	30	522301	Dingwall	802	Papatoetoe Ward	8	Manukau City	02	Auckland Region	2.67612e+06	6.46869e+06	1	666800	9	1096	14	3
666302	114	522301	Dingwall	802	Papatoetoe Ward	8	Manukau City	02	Auckland Region	2.67609e+06	6.46901e+06	1	666302	7	1002	40	2
2763800	36	598500	Geraldine	6401	Geraldine Ward	64	Timaru District	13	Canterbury Region	2.36925e+06	5.67807e+06	1	2763800	7	1022	13	2
2763700	33	598500	Geraldine	6401	Geraldine Ward	64	Timaru District	13	Canterbury Region	2.36892e+06	5.67798e+06	1	2763700	7	1022	12	2
2764000	42	598500	Geraldine	6401	Geraldine Ward	64	Timaru District	13	Canterbury Region	2.36946e+06	5.6779e+06	1	2764000	5	961	15	2
666900	120	522301	Dingwall	802	Papatoetoe Ward	8	Manukau City	02	Auckland Region	2.67625e+06	6.4686e+06	1	666900	9	1096	54	3
666500	171	522301	Dingwall	802	Papatoetoe Ward	8	Manukau City	02	Auckland Region	2.67625e+06	6.46919e+06	1	666500	8	1035	77	3
2633000	141	595100	Hoon Hay	6006	Spreydon-Heathcote Ward	60	Christchurch City	13	Canterbury Region	2.47769e+06	5.73866e+06	1	2633000	4	952	49	2
403800	84	515410	Grey Lynn West	701	Western Bays Ward	7	Auckland City	02	Auckland Region	2.66511e+06	6.48097e+06	1	403800	4	936	29	2
2764400	33	598500	Geraldine	6401	Geraldine Ward	64	Timaru District	13	Canterbury Region	2.3687e+06	5.67729e+06	1	2764400	8	1068	15	3
535600	285	517701	Sandringham North	703	Eden-Albert Ward	7	Auckland City	02	Auckland Region	2.66511e+06	6.47883e+06	1	535600	7	1011	100	2
535400	126	517600	St Lukes	703	Eden-Albert Ward	7	Auckland City	02	Auckland Region	2.66488e+06	6.47874e+06	1	535400	6	997	44	2
666200	105	522301	Dingwall	802	Papatoetoe Ward	8	Manukau City	02	Auckland Region	2.67598e+06	6.46887e+06	1	666200	8	1032	47	3
666000	69	522301	Dingwall	802	Papatoetoe Ward	8	Manukau City	02	Auckland Region	2.67591e+06	6.46917e+06	1	666000	7	1002	24	2
403700	81	515410	Grey Lynn West	701	Western Bays Ward	7	Auckland City	02	Auckland Region	2.66521e+06	6.48098e+06	1	403700	5	956	28	2
665900	117	522301	Dingwall	802	Papatoetoe Ward	8	Manukau City	02	Auckland Region	2.67565e+06	6.46927e+06	1	665900	8	1041	53	3
403900	123	515410	Grey Lynn West	701	Western Bays Ward	7	Auckland City	02	Auckland Region	2.66498e+06	6.48096e+06	1	403900	4	936	43	2
404200	114	515410	Grey Lynn West	701	Western Bays Ward	7	Auckland City	02	Auckland Region	2.66513e+06	6.4808e+06	1	404200	5	969	40	2
666100	228	522301	Dingwall	802	Papatoetoe Ward	8	Manukau City	02	Auckland Region	2.67584e+06	6.46906e+06	1	666100	7	1018	80	2
535000	117	517600	St Lukes	703	Eden-Albert Ward	7	Auckland City	02	Auckland Region	2.66449e+06	6.47877e+06	1	535000	8	1048	53	3
2632000	12	595300	Hillmorton	6006	Spreydon-Heathcote Ward	60	Christchurch City	13	Canterbury Region	2.47767e+06	5.73884e+06	1	2632000	6	987	4	2
2633100	132	595100	Hoon Hay	6006	Spreydon-Heathcote Ward	60	Christchurch City	13	Canterbury Region	2.47789e+06	5.7387e+06	1	2633100	2	914	44	1
404100	63	515410	Grey Lynn West	701	Western Bays Ward	7	Auckland City	02	Auckland Region	2.66499e+06	6.48081e+06	1	404100	5	969	22	2
666400	99	522301	Dingwall	802	Papatoetoe Ward	8	Manukau City	02	Auckland Region	2.67634e+06	6.46897e+06	1	666400	8	1032	45	3
404300	87	515410	Grey Lynn West	701	Western Bays Ward	7	Auckland City	02	Auckland Region	2.66522e+06	6.48082e+06	1	404300	5	966	30	2
2764500	69	598500	Geraldine	6401	Geraldine Ward	64	Timaru District	13	Canterbury Region	2.3692e+06	5.67753e+06	1	2764500	7	1008	24	2
2764200	78	598500	Geraldine	6401	Geraldine Ward	64	Timaru District	13	Canterbury Region	2.36898e+06	5.67778e+06	1	2764200	8	1068	35	3
2764300	36	598500	Geraldine	6401	Geraldine Ward	64	Timaru District	13	Canterbury Region	2.36907e+06	5.67772e+06	1	2764300	8	1068	16	3
2764100	153	598500	Geraldine	6401	Geraldine Ward	64	Timaru District	13	Canterbury Region	2.36876e+06	5.67767e+06	1	2764100	3	934	50	1
2763900	45	598500	Geraldine	6401	Geraldine Ward	64	Timaru District	13	Canterbury Region	2.36927e+06	5.67795e+06	1	2763900	5	961	16	2
667300	174	522301	Dingwall	802	Papatoetoe Ward	8	Manukau City	02	Auckland Region	2.67652e+06	6.46834e+06	1	667300	6	996	61	2
534800	57	517600	St Lukes	703	Eden-Albert Ward	7	Auckland City	02	Auckland Region	2.66484e+06	6.47902e+06	1	534800	7	1010	20	2
667601	162	522301	Dingwall	802	Papatoetoe Ward	8	Manukau City	02	Auckland Region	2.67641e+06	6.46852e+06	1	667601	9	1073	73	3
2635000	45	595200	Hoon Hay South	6006	Spreydon-Heathcote Ward	60	Christchurch City	13	Canterbury Region	2.47825e+06	5.73789e+06	1	2635000	3	932	15	1
2633800	138	595100	Hoon Hay	6006	Spreydon-Heathcote Ward	60	Christchurch City	13	Canterbury Region	2.47774e+06	5.73802e+06	1	2633800	2	910	46	1
668700	264	522302	Papatoetoe East	802	Papatoetoe Ward	8	Manukau City	02	Auckland Region	2.67652e+06	6.46809e+06	1	668700	9	1133	119	3
668801	114	522302	Papatoetoe East	802	Papatoetoe Ward	8	Manukau City	02	Auckland Region	2.67667e+06	6.46806e+06	1	668801	8	1039	51	3
2764900	201	598500	Geraldine	6401	Geraldine Ward	64	Timaru District	13	Canterbury Region	2.36912e+06	5.67688e+06	1	2764900	6	982	70	2
2764700	150	598500	Geraldine	6401	Geraldine Ward	64	Timaru District	13	Canterbury Region	2.36907e+06	5.67717e+06	1	2764700	5	963	52	2
667602	21	522301	Dingwall	802	Papatoetoe Ward	8	Manukau City	02	Auckland Region	2.67631e+06	6.46836e+06	1	667602	9	1073	9	3
2765100	69	598500	Geraldine	6401	Geraldine Ward	64	Timaru District	13	Canterbury Region	2.36952e+06	5.67614e+06	1	2765100	4	947	24	2
2634800	123	595100	Hoon Hay	6006	Spreydon-Heathcote Ward	60	Christchurch City	13	Canterbury Region	2.47811e+06	5.73809e+06	1	2634800	6	994	43	2
668802	33	522302	Papatoetoe East	802	Papatoetoe Ward	8	Manukau City	02	Auckland Region	2.67653e+06	6.46791e+06	1	668802	8	1039	15	3
667500	123	522301	Dingwall	802	Papatoetoe Ward	8	Manukau City	02	Auckland Region	2.67624e+06	6.46843e+06	1	667500	10	1143	55	3
2764600	39	598500	Geraldine	6401	Geraldine Ward	64	Timaru District	13	Canterbury Region	2.36891e+06	5.6775e+06	1	2764600	7	1008	14	2
2764800	123	598500	Geraldine	6401	Geraldine Ward	64	Timaru District	13	Canterbury Region	2.3695e+06	5.67679e+06	1	2764800	5	966	43	2
405300	156	515431	Surrey Crescent	701	Western Bays Ward	7	Auckland City	02	Auckland Region	2.66498e+06	6.4805e+06	1	405300	6	977	55	2
1194600	87	536810	Mt Maunganui North	2301	Mount Maunganui-Papamoa Ward	23	Tauranga City	04	Bay of Plenty Region	2.79075e+06	6.3915e+06	1	1194600	5	968	30	2
1194800	72	536810	Mt Maunganui North	2301	Mount Maunganui-Papamoa Ward	23	Tauranga City	04	Bay of Plenty Region	2.79084e+06	6.39141e+06	1	1194800	5	968	25	2
1194200	24	536810	Mt Maunganui North	2301	Mount Maunganui-Papamoa Ward	23	Tauranga City	04	Bay of Plenty Region	2.79057e+06	6.39181e+06	1	1194200	4	948	8	2
2635100	102	595200	Hoon Hay South	6006	Spreydon-Heathcote Ward	60	Christchurch City	13	Canterbury Region	2.47834e+06	5.73773e+06	1	2635100	4	950	36	2
407800	105	515410	Grey Lynn West	701	Western Bays Ward	7	Auckland City	02	Auckland Region	2.66561e+06	6.48095e+06	1	407800	3	919	35	1
407700	90	515420	Grey Lynn East	701	Western Bays Ward	7	Auckland City	02	Auckland Region	2.66571e+06	6.481e+06	1	407700	2	917	30	1
407600	96	515410	Grey Lynn West	701	Western Bays Ward	7	Auckland City	02	Auckland Region	2.6654e+06	6.48124e+06	1	407600	4	952	34	2
1194500	165	536810	Mt Maunganui North	2301	Mount Maunganui-Papamoa Ward	23	Tauranga City	04	Bay of Plenty Region	2.79074e+06	6.39165e+06	1	1194500	4	948	58	2
408500	174	515410	Grey Lynn West	701	Western Bays Ward	7	Auckland City	02	Auckland Region	2.66549e+06	6.48122e+06	1	408500	4	944	61	2
407500	72	515410	Grey Lynn West	701	Western Bays Ward	7	Auckland City	02	Auckland Region	2.66528e+06	6.48128e+06	1	407500	4	952	25	2
407900	159	515410	Grey Lynn West	701	Western Bays Ward	7	Auckland City	02	Auckland Region	2.66538e+06	6.48082e+06	1	407900	6	997	56	2
1194700	60	536810	Mt Maunganui North	2301	Mount Maunganui-Papamoa Ward	23	Tauranga City	04	Bay of Plenty Region	2.79098e+06	6.39154e+06	1	1194700	5	968	21	2
408400	39	515410	Grey Lynn West	701	Western Bays Ward	7	Auckland City	02	Auckland Region	2.66527e+06	6.48099e+06	1	408400	6	997	14	2
408600	84	515410	Grey Lynn West	701	Western Bays Ward	7	Auckland City	02	Auckland Region	2.66559e+06	6.48118e+06	1	408600	3	919	28	1
1194900	96	536810	Mt Maunganui North	2301	Mount Maunganui-Papamoa Ward	23	Tauranga City	04	Bay of Plenty Region	2.79093e+06	6.39133e+06	1	1194900	5	974	34	2
1195000	69	536810	Mt Maunganui North	2301	Mount Maunganui-Papamoa Ward	23	Tauranga City	04	Bay of Plenty Region	2.79093e+06	6.39115e+06	1	1195000	5	974	24	2
1194400	96	536810	Mt Maunganui North	2301	Mount Maunganui-Papamoa Ward	23	Tauranga City	04	Bay of Plenty Region	2.7906e+06	6.3916e+06	1	1194400	8	1034	43	3
1195400	195	536810	Mt Maunganui North	2301	Mount Maunganui-Papamoa Ward	23	Tauranga City	04	Bay of Plenty Region	2.79136e+06	6.39128e+06	1	1195400	4	951	68	2
1196200	183	536810	Mt Maunganui North	2301	Mount Maunganui-Papamoa Ward	23	Tauranga City	04	Bay of Plenty Region	2.79161e+06	6.39047e+06	1	1196200	7	1012	64	2
1195200	69	536810	Mt Maunganui North	2301	Mount Maunganui-Papamoa Ward	23	Tauranga City	04	Bay of Plenty Region	2.79117e+06	6.39114e+06	1	1195200	5	960	24	2
1195100	39	536810	Mt Maunganui North	2301	Mount Maunganui-Papamoa Ward	23	Tauranga City	04	Bay of Plenty Region	2.79104e+06	6.39119e+06	1	1195100	5	960	14	2
408800	78	515420	Grey Lynn East	701	Western Bays Ward	7	Auckland City	02	Auckland Region	2.6658e+06	6.48118e+06	1	408800	2	906	26	1
1196700	255	536810	Mt Maunganui North	2301	Mount Maunganui-Papamoa Ward	23	Tauranga City	04	Bay of Plenty Region	2.79199e+06	6.39001e+06	1	1196700	5	958	89	2
1195600	48	536810	Mt Maunganui North	2301	Mount Maunganui-Papamoa Ward	23	Tauranga City	04	Bay of Plenty Region	2.79111e+06	6.39098e+06	1	1195600	4	942	17	2
1195500	63	536810	Mt Maunganui North	2301	Mount Maunganui-Papamoa Ward	23	Tauranga City	04	Bay of Plenty Region	2.791e+06	6.39095e+06	1	1195500	4	942	22	2
408900	87	515420	Grey Lynn East	701	Western Bays Ward	7	Auckland City	02	Auckland Region	2.6659e+06	6.48119e+06	1	408900	2	906	29	1
278006	57	512901	Parrs Park	602	Waitakere Ward	6	Waitakere City	02	Auckland Region	2.65514e+06	6.4764e+06	1	278006	9	1099	26	3
278300	282	512901	Parrs Park	602	Waitakere Ward	6	Waitakere City	02	Auckland Region	2.65528e+06	6.47555e+06	1	278300	5	954	99	2
1196000	93	536810	Mt Maunganui North	2301	Mount Maunganui-Papamoa Ward	23	Tauranga City	04	Bay of Plenty Region	2.79144e+06	6.39075e+06	1	1196000	6	977	33	2
278404	183	512901	Parrs Park	602	Waitakere Ward	6	Waitakere City	02	Auckland Region	2.65552e+06	6.47557e+06	1	278404	8	1033	82	3
410200	42	515420	Grey Lynn East	701	Western Bays Ward	7	Auckland City	02	Auckland Region	2.66592e+06	6.48105e+06	1	410200	5	959	15	2
278007	192	512901	Parrs Park	602	Waitakere Ward	6	Waitakere City	02	Auckland Region	2.65498e+06	6.47634e+06	1	278007	9	1099	86	3
1195300	108	536810	Mt Maunganui North	2301	Mount Maunganui-Papamoa Ward	23	Tauranga City	04	Bay of Plenty Region	2.79127e+06	6.3912e+06	1	1195300	2	907	36	1
278901	186	512901	Parrs Park	602	Waitakere Ward	6	Waitakere City	02	Auckland Region	2.65513e+06	6.47581e+06	1	278901	5	958	65	2
410300	66	515420	Grey Lynn East	701	Western Bays Ward	7	Auckland City	02	Auckland Region	2.66595e+06	6.48094e+06	1	410300	3	934	22	1
278510	222	512901	Parrs Park	602	Waitakere Ward	6	Waitakere City	02	Auckland Region	2.65574e+06	6.47562e+06	1	278510	10	1280	100	3
409000	72	515420	Grey Lynn East	701	Western Bays Ward	7	Auckland City	02	Auckland Region	2.666e+06	6.4812e+06	1	409000	3	925	24	1
2121600	108	572900	Thorndon-Tinakori Road	4703	Lambton Ward	47	Wellington City	09	Wellington Region	2.6584e+06	5.99063e+06	1	2121600	5	956	38	2
1196600	192	536810	Mt Maunganui North	2301	Mount Maunganui-Papamoa Ward	23	Tauranga City	04	Bay of Plenty Region	2.79181e+06	6.39023e+06	1	1196600	3	934	63	1
1195800	84	536810	Mt Maunganui North	2301	Mount Maunganui-Papamoa Ward	23	Tauranga City	04	Bay of Plenty Region	2.79159e+06	6.39095e+06	1	1195800	5	963	29	2
410100	87	515420	Grey Lynn East	701	Western Bays Ward	7	Auckland City	02	Auckland Region	2.66581e+06	6.48103e+06	1	410100	5	959	30	2
278005	207	512901	Parrs Park	602	Waitakere Ward	6	Waitakere City	02	Auckland Region	2.65501e+06	6.47651e+06	1	278005	9	1134	93	3
1196100	108	536810	Mt Maunganui North	2301	Mount Maunganui-Papamoa Ward	23	Tauranga City	04	Bay of Plenty Region	2.79133e+06	6.39071e+06	1	1196100	5	963	38	2
408700	198	515420	Grey Lynn East	701	Western Bays Ward	7	Auckland City	02	Auckland Region	2.6657e+06	6.48117e+06	1	408700	3	925	65	1
278103	309	512901	Parrs Park	602	Waitakere Ward	6	Waitakere City	02	Auckland Region	2.65533e+06	6.47628e+06	1	278103	9	1095	139	3
1203207	42	536810	Mt Maunganui North	2301	Mount Maunganui-Papamoa Ward	23	Tauranga City	04	Bay of Plenty Region	2.79176e+06	6.38982e+06	1	1203207	9	1110	19	3
543900	141	518101	Mt Eden North	703	Eden-Albert Ward	7	Auckland City	02	Auckland Region	2.66708e+06	6.4796e+06	1	543900	2	905	47	1
543800	186	518101	Mt Eden North	703	Eden-Albert Ward	7	Auckland City	02	Auckland Region	2.66728e+06	6.47967e+06	1	543800	5	974	65	2
412402	12	514200	Newton	704	Hobson Ward	7	Auckland City	02	Auckland Region	2.66728e+06	6.48061e+06	1	412402	6	984	4	2
544500	60	518101	Mt Eden North	703	Eden-Albert Ward	7	Auckland City	02	Auckland Region	2.66677e+06	6.47978e+06	1	544500	6	979	21	2
544302	24	518101	Mt Eden North	703	Eden-Albert Ward	7	Auckland City	02	Auckland Region	2.66677e+06	6.47985e+06	1	544302	4	948	8	2
412500	72	514200	Newton	704	Hobson Ward	7	Auckland City	02	Auckland Region	2.66729e+06	6.48069e+06	1	412500	6	984	25	2
281300	186	513013	McLaren Park	602	Waitakere Ward	6	Waitakere City	02	Auckland Region	2.65442e+06	6.47672e+06	1	281300	8	1061	84	3
1592100	6	551800	New Plymouth Central	3301	New Plymouth City Ward	33	New Plymouth District	07	Taranaki Region	2.60289e+06	6.2378e+06	1	1592100	6	999	2	2
2638800	198	594800	Barrington North	6006	Spreydon-Heathcote Ward	60	Christchurch City	13	Canterbury Region	2.47765e+06	5.7394e+06	1	2638800	6	998	69	2
2638900	165	594800	Barrington North	6006	Spreydon-Heathcote Ward	60	Christchurch City	13	Canterbury Region	2.4778e+06	5.73937e+06	1	2638900	8	1053	74	3
1590800	75	551800	New Plymouth Central	3301	New Plymouth City Ward	33	New Plymouth District	07	Taranaki Region	2.60251e+06	6.23808e+06	1	1590800	9	1077	34	3
2639300	69	594800	Barrington North	6006	Spreydon-Heathcote Ward	60	Christchurch City	13	Canterbury Region	2.47789e+06	5.73891e+06	1	2639300	6	996	24	2
542700	519	518101	Mt Eden North	703	Eden-Albert Ward	7	Auckland City	02	Auckland Region	2.66768e+06	6.48e+06	1	542700	7	1020	182	2
2122000	18	572900	Thorndon-Tinakori Road	4703	Lambton Ward	47	Wellington City	09	Wellington Region	2.65847e+06	5.99037e+06	1	2122000	4	947	6	2
1196800	135	536810	Mt Maunganui North	2301	Mount Maunganui-Papamoa Ward	23	Tauranga City	04	Bay of Plenty Region	2.79191e+06	6.38983e+06	1	1196800	6	976	47	2
1197200	219	536821	Omanu	2301	Mount Maunganui-Papamoa Ward	23	Tauranga City	04	Bay of Plenty Region	2.79235e+06	6.38972e+06	1	1197200	4	943	77	2
2639000	186	594800	Barrington North	6006	Spreydon-Heathcote Ward	60	Christchurch City	13	Canterbury Region	2.47745e+06	5.73922e+06	1	2639000	9	1105	84	3
542502	270	518101	Mt Eden North	703	Eden-Albert Ward	7	Auckland City	02	Auckland Region	2.66717e+06	6.47992e+06	1	542502	5	971	94	2
542600	135	518101	Mt Eden North	703	Eden-Albert Ward	7	Auckland City	02	Auckland Region	2.66753e+06	6.48003e+06	1	542600	4	950	47	2
542800	285	518101	Mt Eden North	703	Eden-Albert Ward	7	Auckland City	02	Auckland Region	2.6674e+06	6.47985e+06	1	542800	6	981	100	2
1591500	3	551800	New Plymouth Central	3301	New Plymouth City Ward	33	New Plymouth District	07	Taranaki Region	2.60266e+06	6.23783e+06	1	1591500	6	999	1	2
1197000	174	536821	Omanu	2301	Mount Maunganui-Papamoa Ward	23	Tauranga City	04	Bay of Plenty Region	2.79212e+06	6.38959e+06	1	1197000	4	940	61	2
2638701	210	594800	Barrington North	6006	Spreydon-Heathcote Ward	60	Christchurch City	13	Canterbury Region	2.47794e+06	5.73962e+06	1	2638701	7	1010	74	2
280905	357	513012	Palm Heights	602	Waitakere Ward	6	Waitakere City	02	Auckland Region	2.6541e+06	6.47716e+06	1	280905	10	1147	161	3
1591700	18	551800	New Plymouth Central	3301	New Plymouth City Ward	33	New Plymouth District	07	Taranaki Region	2.6027e+06	6.23807e+06	1	1591700	6	999	6	2
542501	9	518101	Mt Eden North	704	Hobson Ward	7	Auckland City	02	Auckland Region	2.66741e+06	6.48011e+06	1	542501	5	971	3	2
410400	78	515420	Grey Lynn East	701	Western Bays Ward	7	Auckland City	02	Auckland Region	2.66602e+06	6.48103e+06	1	410400	3	929	26	1
1591200	3	551800	New Plymouth Central	3301	New Plymouth City Ward	33	New Plymouth District	07	Taranaki Region	2.60256e+06	6.23799e+06	1	1591200	8	1041	1	3
1196900	144	536810	Mt Maunganui North	2301	Mount Maunganui-Papamoa Ward	23	Tauranga City	04	Bay of Plenty Region	2.79203e+06	6.38986e+06	1	1196900	6	992	50	2
2638600	186	594800	Barrington North	6006	Spreydon-Heathcote Ward	60	Christchurch City	13	Canterbury Region	2.47821e+06	5.73977e+06	1	2638600	5	963	65	2
2638702	111	594800	Barrington North	6006	Spreydon-Heathcote Ward	60	Christchurch City	13	Canterbury Region	2.47806e+06	5.73959e+06	1	2638702	6	994	39	2
2121900	69	572900	Thorndon-Tinakori Road	4703	Lambton Ward	47	Wellington City	09	Wellington Region	2.6584e+06	5.99032e+06	1	2121900	6	985	24	2
1197100	162	536821	Omanu	2301	Mount Maunganui-Papamoa Ward	23	Tauranga City	04	Bay of Plenty Region	2.79224e+06	6.38963e+06	1	1197100	3	923	53	1
1594100	6	551800	New Plymouth Central	3301	New Plymouth City Ward	33	New Plymouth District	07	Taranaki Region	2.60395e+06	6.2383e+06	1	1594100	7	1013	2	2
281403	111	513013	McLaren Park	602	Waitakere Ward	6	Waitakere City	02	Auckland Region	2.65448e+06	6.47695e+06	1	281403	8	1063	50	3
2511501	120	588300	Casebrook	6001	Shirley-Papanui Ward	60	Christchurch City	13	Canterbury Region	2.47743e+06	5.74714e+06	1	2511501	3	931	40	1
281509	279	513013	McLaren Park	602	Waitakere Ward	6	Waitakere City	02	Auckland Region	2.65484e+06	6.47674e+06	1	281509	9	1113	126	3
544600	126	518101	Mt Eden North	703	Eden-Albert Ward	7	Auckland City	02	Auckland Region	2.66697e+06	6.47978e+06	1	544600	6	982	44	2
412302	162	514200	Newton	704	Hobson Ward	7	Auckland City	02	Auckland Region	2.6674e+06	6.48065e+06	1	412302	7	1005	57	2
281506	279	513013	McLaren Park	602	Waitakere Ward	6	Waitakere City	02	Auckland Region	2.6548e+06	6.47651e+06	1	281506	9	1083	126	3
544000	162	518101	Mt Eden North	703	Eden-Albert Ward	7	Auckland City	02	Auckland Region	2.66702e+06	6.47951e+06	1	544000	5	970	57	2
1592400	36	551800	New Plymouth Central	3301	New Plymouth City Ward	33	New Plymouth District	07	Taranaki Region	2.60296e+06	6.23804e+06	1	1592400	6	999	13	2
544400	39	518101	Mt Eden North	703	Eden-Albert Ward	7	Auckland City	02	Auckland Region	2.66693e+06	6.47986e+06	1	544400	6	979	14	2
1591900	15	551800	New Plymouth Central	3301	New Plymouth City Ward	33	New Plymouth District	07	Taranaki Region	2.60281e+06	6.23797e+06	1	1591900	6	999	5	2
1593000	60	551800	New Plymouth Central	3301	New Plymouth City Ward	33	New Plymouth District	07	Taranaki Region	2.60353e+06	6.23848e+06	1	1593000	6	981	21	2
281200	84	513020	Opanuku	602	Waitakere Ward	6	Waitakere City	02	Auckland Region	2.65442e+06	6.4764e+06	1	281200	5	968	29	2
1593300	3	551800	New Plymouth Central	3301	New Plymouth City Ward	33	New Plymouth District	07	Taranaki Region	2.60367e+06	6.23842e+06	1	1593300	6	981	1	2
413100	69	514000	Freemans Bay	701	Western Bays Ward	7	Auckland City	02	Auckland Region	2.66688e+06	6.48165e+06	1	413100	9	1122	31	3
413300	222	514000	Freemans Bay	701	Western Bays Ward	7	Auckland City	02	Auckland Region	2.66688e+06	6.4815e+06	1	413300	9	1122	100	3
281502	216	513013	McLaren Park	602	Waitakere Ward	6	Waitakere City	02	Auckland Region	2.65461e+06	6.47688e+06	1	281502	9	1099	97	3
544200	12	518101	Mt Eden North	703	Eden-Albert Ward	7	Auckland City	02	Auckland Region	2.66658e+06	6.47981e+06	1	544200	4	948	4	2
281402	153	513013	McLaren Park	602	Waitakere Ward	6	Waitakere City	02	Auckland Region	2.65432e+06	6.47703e+06	1	281402	6	975	54	2
2122300	27	572900	Thorndon-Tinakori Road	4703	Lambton Ward	47	Wellington City	09	Wellington Region	2.65844e+06	5.99068e+06	1	2122300	4	947	9	2
1592500	3	551800	New Plymouth Central	3301	New Plymouth City Ward	33	New Plymouth District	07	Taranaki Region	2.60309e+06	6.23808e+06	1	1592500	6	999	1	2
543600	51	518101	Mt Eden North	703	Eden-Albert Ward	7	Auckland City	02	Auckland Region	2.66717e+06	6.47978e+06	1	543600	2	915	17	1
412401	123	514200	Newton	704	Hobson Ward	7	Auckland City	02	Auckland Region	2.66733e+06	6.48067e+06	1	412401	3	921	41	1
412700	27	514200	Newton	704	Hobson Ward	7	Auckland City	02	Auckland Region	2.66716e+06	6.48062e+06	1	412700	6	984	9	2
1592700	3	551800	New Plymouth Central	3301	New Plymouth City Ward	33	New Plymouth District	07	Taranaki Region	2.60313e+06	6.23801e+06	1	1592700	6	999	1	2
543700	180	518101	Mt Eden North	703	Eden-Albert Ward	7	Auckland City	02	Auckland Region	2.66712e+06	6.47969e+06	1	543700	5	962	63	2
544700	36	518101	Mt Eden North	703	Eden-Albert Ward	7	Auckland City	02	Auckland Region	2.66657e+06	6.4797e+06	1	544700	3	934	12	1
543500	102	518101	Mt Eden North	703	Eden-Albert Ward	7	Auckland City	02	Auckland Region	2.66721e+06	6.47983e+06	1	543500	4	950	36	2
412600	33	514200	Newton	704	Hobson Ward	7	Auckland City	02	Auckland Region	2.66719e+06	6.48073e+06	1	412600	6	984	12	2
1592000	3	551800	New Plymouth Central	3301	New Plymouth City Ward	33	New Plymouth District	07	Taranaki Region	2.60285e+06	6.2379e+06	1	1592000	6	999	1	2
1592900	3	551800	New Plymouth Central	3301	New Plymouth City Ward	33	New Plymouth District	07	Taranaki Region	2.6032e+06	6.23791e+06	1	1592900	6	999	1	2
1592800	3	551800	New Plymouth Central	3301	New Plymouth City Ward	33	New Plymouth District	07	Taranaki Region	2.60306e+06	6.23786e+06	1	1592800	6	999	1	2
281510	162	513013	McLaren Park	602	Waitakere Ward	6	Waitakere City	02	Auckland Region	2.65463e+06	6.47668e+06	1	281510	9	1107	73	3
1595200	105	552002	Marsland Hill	3301	New Plymouth City Ward	33	New Plymouth District	07	Taranaki Region	2.60348e+06	6.23771e+06	1	1595200	6	988	37	2
2119700	27	572900	Thorndon-Tinakori Road	4703	Lambton Ward	47	Wellington City	09	Wellington Region	2.65878e+06	5.99074e+06	1	2119700	5	967	9	2
1596500	123	552001	Mount Bryan	3301	New Plymouth City Ward	33	New Plymouth District	07	Taranaki Region	2.60433e+06	6.23828e+06	1	1596500	7	1013	43	2
1202800	6	536810	Mt Maunganui North	2301	Mount Maunganui-Papamoa Ward	23	Tauranga City	04	Bay of Plenty Region	2.79125e+06	6.39052e+06	1	1202800	10	1181	3	3
1202901	15	536810	Mt Maunganui North	2301	Mount Maunganui-Papamoa Ward	23	Tauranga City	04	Bay of Plenty Region	2.79138e+06	6.39039e+06	1	1202901	10	1181	7	3
545000	174	518101	Mt Eden North	703	Eden-Albert Ward	7	Auckland City	02	Auckland Region	2.66686e+06	6.47963e+06	1	545000	6	985	61	2
1594000	24	551800	New Plymouth Central	3301	New Plymouth City Ward	33	New Plymouth District	07	Taranaki Region	2.60361e+06	6.23818e+06	1	1594000	7	1013	8	2
1593900	6	551800	New Plymouth Central	3301	New Plymouth City Ward	33	New Plymouth District	07	Taranaki Region	2.60332e+06	6.23808e+06	1	1593900	7	1013	2	2
2118300	201	572900	Thorndon-Tinakori Road	4703	Lambton Ward	47	Wellington City	09	Wellington Region	2.6593e+06	5.99086e+06	1	2118300	4	940	70	2
545800	54	518102	Sherbourne	703	Eden-Albert Ward	7	Auckland City	02	Auckland Region	2.66666e+06	6.47948e+06	1	545800	3	924	18	1
544900	150	518101	Mt Eden North	703	Eden-Albert Ward	7	Auckland City	02	Auckland Region	2.66672e+06	6.47964e+06	1	544900	7	1014	52	2
1594600	39	551800	New Plymouth Central	3301	New Plymouth City Ward	33	New Plymouth District	07	Taranaki Region	2.60363e+06	6.23798e+06	1	1594600	6	981	14	2
1593500	9	551800	New Plymouth Central	3301	New Plymouth City Ward	33	New Plymouth District	07	Taranaki Region	2.60394e+06	6.23853e+06	1	1593500	6	981	3	2
545300	123	518102	Sherbourne	703	Eden-Albert Ward	7	Auckland City	02	Auckland Region	2.66696e+06	6.47936e+06	1	545300	6	991	43	2
545200	108	518102	Sherbourne	703	Eden-Albert Ward	7	Auckland City	02	Auckland Region	2.66687e+06	6.4794e+06	1	545200	4	944	38	2
2122500	147	572900	Thorndon-Tinakori Road	4703	Lambton Ward	47	Wellington City	09	Wellington Region	2.65901e+06	5.99064e+06	1	2122500	6	985	51	2
1594900	63	552002	Marsland Hill	3301	New Plymouth City Ward	33	New Plymouth District	07	Taranaki Region	2.60402e+06	6.23812e+06	1	1594900	9	1077	28	3
545500	72	518102	Sherbourne	703	Eden-Albert Ward	7	Auckland City	02	Auckland Region	2.6668e+06	6.47925e+06	1	545500	4	948	25	2
1594800	33	552002	Marsland Hill	3301	New Plymouth City Ward	33	New Plymouth District	07	Taranaki Region	2.60379e+06	6.23804e+06	1	1594800	9	1077	15	3
544800	15	518101	Mt Eden North	703	Eden-Albert Ward	7	Auckland City	02	Auckland Region	2.66656e+06	6.4796e+06	1	544800	6	979	5	2
545100	123	518102	Sherbourne	703	Eden-Albert Ward	7	Auckland City	02	Auckland Region	2.66675e+06	6.47944e+06	1	545100	6	990	43	2
545400	111	518102	Sherbourne	703	Eden-Albert Ward	7	Auckland City	02	Auckland Region	2.66707e+06	6.47933e+06	1	545400	6	987	39	2
1594500	15	551800	New Plymouth Central	3301	New Plymouth City Ward	33	New Plymouth District	07	Taranaki Region	2.60342e+06	6.2379e+06	1	1594500	6	981	5	2
2121300	3	572900	Thorndon-Tinakori Road	4703	Lambton Ward	47	Wellington City	09	Wellington Region	2.65888e+06	5.99074e+06	1	2121300	7	1009	1	2
1598000	9	552100	Fitzroy	3301	New Plymouth City Ward	33	New Plymouth District	07	Taranaki Region	2.60482e+06	6.23829e+06	1	1598000	4	944	3	2
1595500	141	552002	Marsland Hill	3301	New Plymouth City Ward	33	New Plymouth District	07	Taranaki Region	2.6038e+06	6.23762e+06	1	1595500	1	886	47	1
1596600	96	552001	Mount Bryan	3301	New Plymouth City Ward	33	New Plymouth District	07	Taranaki Region	2.60437e+06	6.23813e+06	1	1596600	5	967	34	2
1595300	81	552002	Marsland Hill	3301	New Plymouth City Ward	33	New Plymouth District	07	Taranaki Region	2.60323e+06	6.23764e+06	1	1595300	8	1042	36	3
1202902	63	536810	Mt Maunganui North	2301	Mount Maunganui-Papamoa Ward	23	Tauranga City	04	Bay of Plenty Region	2.79154e+06	6.39034e+06	1	1202902	10	1181	28	3
1595000	162	552002	Marsland Hill	3301	New Plymouth City Ward	33	New Plymouth District	07	Taranaki Region	2.60403e+06	6.23798e+06	1	1595000	8	1048	73	3
1596000	150	552001	Mount Bryan	3301	New Plymouth City Ward	33	New Plymouth District	07	Taranaki Region	2.60412e+06	6.23866e+06	1	1596000	5	957	52	2
1595800	150	552001	Mount Bryan	3301	New Plymouth City Ward	33	New Plymouth District	07	Taranaki Region	2.60382e+06	6.23868e+06	1	1595800	7	1007	52	2
1726500	54	556200	Gonville South	3702	Urban Ward	37	Wanganui District	08	Manawatu-Wanganui Region	2.68421e+06	6.13812e+06	1	1726500	7	1010	19	2
1727400	36	557000	Spriggens Park	3702	Urban Ward	37	Wanganui District	08	Manawatu-Wanganui Region	2.68456e+06	6.13825e+06	1	1727400	9	1131	16	3
1595100	108	552002	Marsland Hill	3301	New Plymouth City Ward	33	New Plymouth District	07	Taranaki Region	2.60375e+06	6.23791e+06	1	1595100	7	1021	38	2
2120000	78	572900	Thorndon-Tinakori Road	4703	Lambton Ward	47	Wellington City	09	Wellington Region	2.65863e+06	5.99076e+06	1	2120000	5	967	27	2
1596300	123	552001	Mount Bryan	3301	New Plymouth City Ward	33	New Plymouth District	07	Taranaki Region	2.60449e+06	6.23846e+06	1	1596300	5	962	43	2
1596100	39	552001	Mount Bryan	3301	New Plymouth City Ward	33	New Plymouth District	07	Taranaki Region	2.60419e+06	6.23851e+06	1	1596100	5	967	14	2
1595400	117	552002	Marsland Hill	3301	New Plymouth City Ward	33	New Plymouth District	07	Taranaki Region	2.6038e+06	6.23779e+06	1	1595400	4	938	41	2
2120100	45	572900	Thorndon-Tinakori Road	4703	Lambton Ward	47	Wellington City	09	Wellington Region	2.65846e+06	5.99074e+06	1	2120100	5	967	16	2
2119900	15	572900	Thorndon-Tinakori Road	4703	Lambton Ward	47	Wellington City	09	Wellington Region	2.65868e+06	5.99072e+06	1	2119900	5	967	5	2
1596400	69	552001	Mount Bryan	3301	New Plymouth City Ward	33	New Plymouth District	07	Taranaki Region	2.60425e+06	6.23842e+06	1	1596400	7	1009	24	2
1202700	6	536810	Mt Maunganui North	2301	Mount Maunganui-Papamoa Ward	23	Tauranga City	04	Bay of Plenty Region	2.79122e+06	6.39063e+06	1	1202700	10	1181	3	3
1726700	48	556200	Gonville South	3702	Urban Ward	37	Wanganui District	08	Manawatu-Wanganui Region	2.68444e+06	6.13811e+06	1	1726700	6	994	17	2
1726200	69	556200	Gonville South	3702	Urban Ward	37	Wanganui District	08	Manawatu-Wanganui Region	2.68413e+06	6.13789e+06	1	1726200	9	1101	31	3
1727300	3	557000	Spriggens Park	3702	Urban Ward	37	Wanganui District	08	Manawatu-Wanganui Region	2.68499e+06	6.13854e+06	1	1727300	9	1075	1	3
2091400	120	574302	Te Kainga	4702	Onslow-Western Ward	47	Wellington City	09	Wellington Region	2.66031e+06	5.99378e+06	1	2091400	1	855	40	1
1727100	30	557000	Spriggens Park	3702	Urban Ward	37	Wanganui District	08	Manawatu-Wanganui Region	2.68459e+06	6.13844e+06	1	1727100	9	1131	14	3
1727000	87	557000	Spriggens Park	3702	Urban Ward	37	Wanganui District	08	Manawatu-Wanganui Region	2.68468e+06	6.13882e+06	1	1727000	8	1071	39	3
964900	63	527503	Cambridge Central	1702	Cambridge Ward	17	Waipa District	03	Waikato Region	2.7272e+06	6.36466e+06	1	964900	6	985	22	2
1595600	132	552002	Marsland Hill	3301	New Plymouth City Ward	33	New Plymouth District	07	Taranaki Region	2.60348e+06	6.23757e+06	1	1595600	4	945	46	2
1203000	141	536810	Mt Maunganui North	2301	Mount Maunganui-Papamoa Ward	23	Tauranga City	04	Bay of Plenty Region	2.7915e+06	6.39012e+06	1	1203000	7	1024	49	2
1596200	12	552001	Mount Bryan	3301	New Plymouth City Ward	33	New Plymouth District	07	Taranaki Region	2.60446e+06	6.23857e+06	1	1596200	5	967	4	2
1595900	66	552001	Mount Bryan	3301	New Plymouth City Ward	33	New Plymouth District	07	Taranaki Region	2.60385e+06	6.2386e+06	1	1595900	5	958	23	2
1595700	57	552001	Mount Bryan	3301	New Plymouth City Ward	33	New Plymouth District	07	Taranaki Region	2.60355e+06	6.23858e+06	1	1595700	7	1007	20	2
1203204	108	536810	Mt Maunganui North	2301	Mount Maunganui-Papamoa Ward	23	Tauranga City	04	Bay of Plenty Region	2.79161e+06	6.3899e+06	1	1203204	8	1050	49	3
1726600	138	556200	Gonville South	3702	Urban Ward	37	Wanganui District	08	Manawatu-Wanganui Region	2.68432e+06	6.13807e+06	1	1726600	8	1030	62	3
1598102	45	552100	Fitzroy	3301	New Plymouth City Ward	33	New Plymouth District	07	Taranaki Region	2.6051e+06	6.23826e+06	1	1598102	5	961	16	2
1597000	75	552100	Fitzroy	3301	New Plymouth City Ward	33	New Plymouth District	07	Taranaki Region	2.60475e+06	6.23881e+06	1	1597000	3	931	25	1
1597300	132	552100	Fitzroy	3301	New Plymouth City Ward	33	New Plymouth District	07	Taranaki Region	2.60516e+06	6.2387e+06	1	1597300	7	1026	46	2
1597100	45	552100	Fitzroy	3301	New Plymouth City Ward	33	New Plymouth District	07	Taranaki Region	2.60458e+06	6.23869e+06	1	1597100	3	931	15	1
2121200	144	572900	Thorndon-Tinakori Road	4703	Lambton Ward	47	Wellington City	09	Wellington Region	2.65902e+06	5.99082e+06	1	2121200	7	1009	50	2
1597500	36	552100	Fitzroy	3301	New Plymouth City Ward	33	New Plymouth District	07	Taranaki Region	2.60513e+06	6.23855e+06	1	1597500	4	941	13	2
1597700	66	552100	Fitzroy	3301	New Plymouth City Ward	33	New Plymouth District	07	Taranaki Region	2.6047e+06	6.2385e+06	1	1597700	5	958	23	2
681332	72	522722	Aberfeldy	806	Howick Ward	8	Manukau City	02	Auckland Region	2.68022e+06	6.475e+06	1	681332	5	967	25	2
1598101	126	552100	Fitzroy	3301	New Plymouth City Ward	33	New Plymouth District	07	Taranaki Region	2.605e+06	6.23836e+06	1	1598101	5	961	44	2
1597900	36	552100	Fitzroy	3301	New Plymouth City Ward	33	New Plymouth District	07	Taranaki Region	2.60514e+06	6.2384e+06	1	1597900	4	944	13	2
2122400	63	572900	Thorndon-Tinakori Road	4703	Lambton Ward	47	Wellington City	09	Wellington Region	2.65862e+06	5.99066e+06	1	2122400	4	947	22	2
1597200	135	552100	Fitzroy	3301	New Plymouth City Ward	33	New Plymouth District	07	Taranaki Region	2.60505e+06	6.23888e+06	1	1597200	5	970	47	2
2121100	30	572900	Thorndon-Tinakori Road	4703	Lambton Ward	47	Wellington City	09	Wellington Region	2.65885e+06	5.99086e+06	1	2121100	7	1009	10	2
1597800	57	552100	Fitzroy	3301	New Plymouth City Ward	33	New Plymouth District	07	Taranaki Region	2.60479e+06	6.23853e+06	1	1597800	5	958	20	2
1597400	123	552100	Fitzroy	3301	New Plymouth City Ward	33	New Plymouth District	07	Taranaki Region	2.60496e+06	6.23864e+06	1	1597400	4	941	43	2
1597600	30	552100	Fitzroy	3301	New Plymouth City Ward	33	New Plymouth District	07	Taranaki Region	2.60525e+06	6.23858e+06	1	1597600	4	941	10	2
1466709	15	548833	Te Mata Hills	3009	Poukawa Ward	30	Hastings District	06	Hawke's Bay Region	2.84515e+06	6.16275e+06	1	1466709	1	884	5	1
289100	192	512100	Green Bay	604	New Lynn Ward	6	Waitakere City	02	Auckland Region	2.66078e+06	6.47326e+06	1	289100	6	986	67	2
2780800	117	599000	Maori Park	6404	Timaru Ward	64	Timaru District	13	Canterbury Region	2.36992e+06	5.64492e+06	1	2780800	5	973	41	2
2780900	69	599000	Maori Park	6404	Timaru Ward	64	Timaru District	13	Canterbury Region	2.37013e+06	5.64489e+06	1	2780900	8	1056	31	3
2125300	3	573000	Lambton	4703	Lambton Ward	47	Wellington City	09	Wellington Region	2.65883e+06	5.99008e+06	1	2125300	8	1047	1	3
2124700	3	573000	Lambton	4703	Lambton Ward	47	Wellington City	09	Wellington Region	2.65864e+06	5.99009e+06	1	2124700	5	970	1	2
2124900	261	573000	Lambton	4703	Lambton Ward	47	Wellington City	09	Wellington Region	2.65843e+06	5.98995e+06	1	2124900	10	1144	117	3
1600700	69	552200	Welbourn	3301	New Plymouth City Ward	33	New Plymouth District	07	Taranaki Region	2.60415e+06	6.23749e+06	1	1600700	9	1089	31	3
419900	126	515600	Eden Terrace	704	Hobson Ward	7	Auckland City	02	Auckland Region	2.66673e+06	6.48035e+06	1	419900	6	987	44	2
419701	171	515600	Eden Terrace	704	Hobson Ward	7	Auckland City	02	Auckland Region	2.66694e+06	6.48004e+06	1	419701	7	1019	60	2
420700	30	515600	Eden Terrace	704	Hobson Ward	7	Auckland City	02	Auckland Region	2.66707e+06	6.48035e+06	1	420700	7	1006	10	2
419600	129	515600	Eden Terrace	704	Hobson Ward	7	Auckland City	02	Auckland Region	2.66665e+06	6.48027e+06	1	419600	5	956	45	2
681334	120	522722	Aberfeldy	806	Howick Ward	8	Manukau City	02	Auckland Region	2.68026e+06	6.47467e+06	1	681334	3	919	40	1
2123900	237	573000	Lambton	4703	Lambton Ward	47	Wellington City	09	Wellington Region	2.6586e+06	5.99031e+06	1	2123900	10	1246	107	3
681311	225	522722	Aberfeldy	806	Howick Ward	8	Manukau City	02	Auckland Region	2.68093e+06	6.47601e+06	1	681311	4	953	79	2
1599500	51	552100	Fitzroy	3301	New Plymouth City Ward	33	New Plymouth District	07	Taranaki Region	2.60537e+06	6.23896e+06	1	1599500	5	955	18	2
1599700	15	552100	Fitzroy	3301	New Plymouth City Ward	33	New Plymouth District	07	Taranaki Region	2.60561e+06	6.23877e+06	1	1599700	5	955	5	2
681309	324	522722	Aberfeldy	806	Howick Ward	8	Manukau City	02	Auckland Region	2.68067e+06	6.4762e+06	1	681309	8	1032	146	3
681323	54	522722	Aberfeldy	806	Howick Ward	8	Manukau City	02	Auckland Region	2.68049e+06	6.47482e+06	1	681323	3	930	18	1
681331	57	522722	Aberfeldy	806	Howick Ward	8	Manukau City	02	Auckland Region	2.68016e+06	6.47494e+06	1	681331	3	930	19	1
1598501	87	552100	Fitzroy	3301	New Plymouth City Ward	33	New Plymouth District	07	Taranaki Region	2.60543e+06	6.23836e+06	1	1598501	4	944	30	2
681312	135	522722	Aberfeldy	806	Howick Ward	8	Manukau City	02	Auckland Region	2.68108e+06	6.47592e+06	1	681312	3	927	45	1
2123700	66	573000	Lambton	4703	Lambton Ward	47	Wellington City	09	Wellington Region	2.65874e+06	5.99042e+06	1	2123700	5	970	23	2
1598300	93	552100	Fitzroy	3301	New Plymouth City Ward	33	New Plymouth District	07	Taranaki Region	2.60534e+06	6.23832e+06	1	1598300	6	984	33	2
681333	75	522722	Aberfeldy	806	Howick Ward	8	Manukau City	02	Auckland Region	2.68031e+06	6.47498e+06	1	681333	5	967	26	2
1599600	171	552100	Fitzroy	3301	New Plymouth City Ward	33	New Plymouth District	07	Taranaki Region	2.60541e+06	6.2388e+06	1	1599600	10	1216	77	3
419800	60	515600	Eden Terrace	704	Hobson Ward	7	Auckland City	02	Auckland Region	2.66687e+06	6.48018e+06	1	419800	6	987	21	2
288900	132	512100	Green Bay	604	New Lynn Ward	6	Waitakere City	02	Auckland Region	2.6604e+06	6.47323e+06	1	288900	4	953	46	2
419500	147	515600	Eden Terrace	703	Eden-Albert Ward	7	Auckland City	02	Auckland Region	2.6666e+06	6.48021e+06	1	419500	7	1007	51	2
1598401	30	552100	Fitzroy	3301	New Plymouth City Ward	33	New Plymouth District	07	Taranaki Region	2.6055e+06	6.23851e+06	1	1598401	4	944	10	2
681310	147	522722	Aberfeldy	806	Howick Ward	8	Manukau City	02	Auckland Region	2.68093e+06	6.47618e+06	1	681310	8	1033	66	3
681500	243	522723	Elsmore Park	803	Pakuranga Ward	8	Manukau City	02	Auckland Region	2.67978e+06	6.47491e+06	1	681500	5	954	85	2
2126400	333	573000	Lambton	4703	Lambton Ward	47	Wellington City	09	Wellington Region	2.65856e+06	5.98981e+06	1	2126400	7	1012	117	2
2126700	147	573000	Lambton	4703	Lambton Ward	47	Wellington City	09	Wellington Region	2.65848e+06	5.98961e+06	1	2126700	6	978	51	2
2126500	162	573000	Lambton	4703	Lambton Ward	47	Wellington City	09	Wellington Region	2.65858e+06	5.98974e+06	1	2126500	9	1121	73	3
2124800	237	573000	Lambton	4703	Lambton Ward	47	Wellington City	09	Wellington Region	2.65858e+06	5.98998e+06	1	2124800	9	1126	107	3
2125600	33	573000	Lambton	4703	Lambton Ward	47	Wellington City	09	Wellington Region	2.65879e+06	5.99002e+06	1	2125600	8	1047	15	3
421100	9	515600	Eden Terrace	704	Hobson Ward	7	Auckland City	02	Auckland Region	2.66727e+06	6.48013e+06	1	421100	7	1029	3	2
421000	84	515600	Eden Terrace	704	Hobson Ward	7	Auckland City	02	Auckland Region	2.66718e+06	6.48019e+06	1	421000	7	1006	29	2
1600500	60	552100	Fitzroy	3301	New Plymouth City Ward	33	New Plymouth District	07	Taranaki Region	2.60584e+06	6.23896e+06	1	1600500	6	988	21	2
2125000	12	573000	Lambton	4703	Lambton Ward	47	Wellington City	09	Wellington Region	2.65889e+06	5.99023e+06	1	2125000	8	1047	5	3
2124500	123	573000	Lambton	4703	Lambton Ward	47	Wellington City	09	Wellington Region	2.65844e+06	5.99019e+06	1	2124500	5	970	43	2
1601100	3	552200	Welbourn	3301	New Plymouth City Ward	33	New Plymouth District	07	Taranaki Region	2.60394e+06	6.23721e+06	1	1601100	9	1089	1	3
441504	3	514301	Grafton West	704	Hobson Ward	7	Auckland City	02	Auckland Region	2.66759e+06	6.48052e+06	1	441504	8	1066	1	3
420900	36	515600	Eden Terrace	704	Hobson Ward	7	Auckland City	02	Auckland Region	2.66695e+06	6.48026e+06	1	420900	7	1006	13	2
420600	33	515600	Eden Terrace	704	Hobson Ward	7	Auckland City	02	Auckland Region	2.66735e+06	6.48042e+06	1	420600	7	1029	12	2
1600800	33	552200	Welbourn	3301	New Plymouth City Ward	33	New Plymouth District	07	Taranaki Region	2.60417e+06	6.2374e+06	1	1600800	9	1089	15	3
421200	78	515600	Eden Terrace	704	Hobson Ward	7	Auckland City	02	Auckland Region	2.66737e+06	6.48022e+06	1	421200	7	1029	27	2
2124400	9	573000	Lambton	4703	Lambton Ward	47	Wellington City	09	Wellington Region	2.65868e+06	5.99001e+06	1	2124400	5	970	3	2
289000	150	512100	Green Bay	604	New Lynn Ward	6	Waitakere City	02	Auckland Region	2.66059e+06	6.47324e+06	1	289000	8	1036	68	3
420800	390	515600	Eden Terrace	704	Hobson Ward	7	Auckland City	02	Auckland Region	2.66699e+06	6.48035e+06	1	420800	6	986	136	2
2125500	21	573000	Lambton	4703	Lambton Ward	47	Wellington City	09	Wellington Region	2.65887e+06	5.98998e+06	1	2125500	8	1047	9	3
2124300	129	573000	Lambton	4703	Lambton Ward	47	Wellington City	09	Wellington Region	2.65899e+06	5.99e+06	1	2124300	4	943	45	2
1599800	60	552100	Fitzroy	3301	New Plymouth City Ward	33	New Plymouth District	07	Taranaki Region	2.60561e+06	6.23892e+06	1	1599800	7	1023	21	2
2124000	6	573000	Lambton	4703	Lambton Ward	47	Wellington City	09	Wellington Region	2.65871e+06	5.99022e+06	1	2124000	5	970	2	2
420500	207	515600	Eden Terrace	704	Hobson Ward	7	Auckland City	02	Auckland Region	2.66725e+06	6.48038e+06	1	420500	4	944	72	2
420400	96	515600	Eden Terrace	704	Hobson Ward	7	Auckland City	02	Auckland Region	2.66712e+06	6.48049e+06	1	420400	7	1030	34	2
1600900	177	552200	Welbourn	3301	New Plymouth City Ward	33	New Plymouth District	07	Taranaki Region	2.60433e+06	6.23727e+06	1	1600900	5	959	62	2
1600600	33	552200	Welbourn	3301	New Plymouth City Ward	33	New Plymouth District	07	Taranaki Region	2.60406e+06	6.23761e+06	1	1600600	9	1089	15	3
2128500	15	573000	Lambton	4703	Lambton Ward	47	Wellington City	09	Wellington Region	2.65857e+06	5.98926e+06	1	2128500	8	1068	7	3
818500	42	525910	Pukekohe North	1003	Pukekohe Ward	10	Franklin District	02	Auckland Region	2.67921e+06	6.44302e+06	1	818500	10	1150	19	3
2128600	42	573000	Lambton	4703	Lambton Ward	47	Wellington City	09	Wellington Region	2.65844e+06	5.98924e+06	1	2128600	8	1068	19	3
2127700	57	573000	Lambton	4703	Lambton Ward	47	Wellington City	09	Wellington Region	2.65864e+06	5.98951e+06	1	2127700	9	1073	26	3
1472300	78	545721	Karamu	3003	Heretaunga Ward	30	Hastings District	06	Hawke's Bay Region	2.84222e+06	6.16778e+06	1	1472300	8	1041	35	3
2127200	90	573000	Lambton	4703	Lambton Ward	47	Wellington City	09	Wellington Region	2.65856e+06	5.98964e+06	1	2127200	6	993	31	2
2127000	39	573000	Lambton	4703	Lambton Ward	47	Wellington City	09	Wellington Region	2.65866e+06	5.98966e+06	1	2127000	8	1047	18	3
1471700	66	545721	Karamu	3003	Heretaunga Ward	30	Hastings District	06	Hawke's Bay Region	2.84215e+06	6.16813e+06	1	1471700	7	1023	23	2
2127300	6	573000	Lambton	4703	Lambton Ward	47	Wellington City	09	Wellington Region	2.65868e+06	5.98957e+06	1	2127300	8	1047	3	3
2126100	21	573000	Lambton	4703	Lambton Ward	47	Wellington City	09	Wellington Region	2.65848e+06	5.98991e+06	1	2126100	9	1121	9	3
2126200	9	573000	Lambton	4703	Lambton Ward	47	Wellington City	09	Wellington Region	2.65865e+06	5.98984e+06	1	2126200	8	1047	4	3
2125900	3	573000	Lambton	4703	Lambton Ward	47	Wellington City	09	Wellington Region	2.65886e+06	5.98974e+06	1	2125900	8	1047	1	3
2127400	3	573000	Lambton	4703	Lambton Ward	47	Wellington City	09	Wellington Region	2.65874e+06	5.9895e+06	1	2127400	8	1047	1	3
2126600	54	573000	Lambton	4703	Lambton Ward	47	Wellington City	09	Wellington Region	2.65867e+06	5.98973e+06	1	2126600	8	1047	24	3
2126800	24	573000	Lambton	4703	Lambton Ward	47	Wellington City	09	Wellington Region	2.65839e+06	5.98978e+06	1	2126800	9	1121	11	3
2126900	108	573000	Lambton	4703	Lambton Ward	47	Wellington City	09	Wellington Region	2.65837e+06	5.98942e+06	1	2126900	7	1004	38	2
2125700	3	573000	Lambton	4703	Lambton Ward	47	Wellington City	09	Wellington Region	2.65875e+06	5.98991e+06	1	2125700	8	1047	1	3
1472000	66	545721	Karamu	3003	Heretaunga Ward	30	Hastings District	06	Hawke's Bay Region	2.84247e+06	6.16819e+06	1	1472000	5	971	23	2
2125800	27	573000	Lambton	4703	Lambton Ward	47	Wellington City	09	Wellington Region	2.6588e+06	5.98984e+06	1	2125800	8	1047	12	3
2129400	69	573000	Lambton	4703	Lambton Ward	47	Wellington City	09	Wellington Region	2.65831e+06	5.98902e+06	1	2129400	5	969	24	2
2128100	6	573000	Lambton	4703	Lambton Ward	47	Wellington City	09	Wellington Region	2.65862e+06	5.98944e+06	1	2128100	8	1040	3	3
2129300	57	573000	Lambton	4703	Lambton Ward	47	Wellington City	09	Wellington Region	2.65824e+06	5.98905e+06	1	2129300	5	969	20	2
2128400	147	573000	Lambton	4703	Lambton Ward	47	Wellington City	09	Wellington Region	2.65859e+06	5.98932e+06	1	2128400	8	1068	66	3
2129200	66	573000	Lambton	4703	Lambton Ward	47	Wellington City	09	Wellington Region	2.65836e+06	5.9893e+06	1	2129200	7	1004	23	2
818600	27	525910	Pukekohe North	1003	Pukekohe Ward	10	Franklin District	02	Auckland Region	2.67938e+06	6.4431e+06	1	818600	2	915	9	1
817300	84	525910	Pukekohe North	1003	Pukekohe Ward	10	Franklin District	02	Auckland Region	2.67977e+06	6.44299e+06	1	817300	7	1019	29	2
2127600	105	573000	Lambton	4703	Lambton Ward	47	Wellington City	09	Wellington Region	2.65853e+06	5.98955e+06	1	2127600	9	1073	47	3
817200	240	525922	Bledisloe Park	1003	Pukekohe Ward	10	Franklin District	02	Auckland Region	2.67995e+06	6.44281e+06	1	817200	4	952	84	2
2128800	162	573000	Lambton	4703	Lambton Ward	47	Wellington City	09	Wellington Region	2.65834e+06	5.98923e+06	1	2128800	8	1068	73	3
2128000	105	573000	Lambton	4703	Lambton Ward	47	Wellington City	09	Wellington Region	2.65851e+06	5.9895e+06	1	2128000	8	1040	47	3
2129000	141	573000	Lambton	4703	Lambton Ward	47	Wellington City	09	Wellington Region	2.65848e+06	5.9892e+06	1	2129000	10	1500	63	3
2129100	6	573000	Lambton	4703	Lambton Ward	47	Wellington City	09	Wellington Region	2.65854e+06	5.9892e+06	1	2129100	7	1004	2	2
2127900	93	573000	Lambton	4703	Lambton Ward	47	Wellington City	09	Wellington Region	2.65849e+06	5.98944e+06	1	2127900	8	1040	42	3
2128700	111	573000	Lambton	4703	Lambton Ward	47	Wellington City	09	Wellington Region	2.65841e+06	5.98918e+06	1	2128700	8	1068	50	3
2128200	153	573000	Lambton	4703	Lambton Ward	47	Wellington City	09	Wellington Region	2.65843e+06	5.98934e+06	1	2128200	5	967	54	2
2128300	24	573000	Lambton	4703	Lambton Ward	47	Wellington City	09	Wellington Region	2.6585e+06	5.98933e+06	1	2128300	8	1068	11	3
2128900	120	573000	Lambton	4703	Lambton Ward	47	Wellington City	09	Wellington Region	2.65829e+06	5.98929e+06	1	2128900	7	1025	42	2
2131600	270	573101	Willis Street-Cambridge Terrace	4703	Lambton Ward	47	Wellington City	09	Wellington Region	2.65849e+06	5.98891e+06	1	2131600	10	1255	122	3
2131500	201	573101	Willis Street-Cambridge Terrace	4703	Lambton Ward	47	Wellington City	09	Wellington Region	2.65867e+06	5.98895e+06	1	2131500	6	988	70	2
2131300	135	573101	Willis Street-Cambridge Terrace	4703	Lambton Ward	47	Wellington City	09	Wellington Region	2.65867e+06	5.98916e+06	1	2131300	8	1056	61	3
2131100	114	573101	Willis Street-Cambridge Terrace	4703	Lambton Ward	47	Wellington City	09	Wellington Region	2.65874e+06	5.98924e+06	1	2131100	10	1176	51	3
821500	135	525921	Pukekohe West	1003	Pukekohe Ward	10	Franklin District	02	Auckland Region	2.67885e+06	6.44288e+06	1	821500	10	1206	61	3
2525203	189	588500	Kaimahi	6002	Fendalton-Waimairi Ward	60	Christchurch City	13	Canterbury Region	2.47707e+06	5.74702e+06	1	2525203	8	1049	85	3
2130300	108	573000	Lambton	4703	Lambton Ward	47	Wellington City	09	Wellington Region	2.65819e+06	5.98877e+06	1	2130300	7	1017	38	2
2130200	81	573000	Lambton	4703	Lambton Ward	47	Wellington City	09	Wellington Region	2.65829e+06	5.98872e+06	1	2130200	7	1018	28	2
2129500	96	573000	Lambton	4703	Lambton Ward	47	Wellington City	09	Wellington Region	2.65829e+06	5.98893e+06	1	2129500	5	967	34	2
2130400	201	573000	Lambton	4703	Lambton Ward	47	Wellington City	09	Wellington Region	2.65829e+06	5.98914e+06	1	2130400	10	1313	90	3
818700	39	525910	Pukekohe North	1003	Pukekohe Ward	10	Franklin District	02	Auckland Region	2.67947e+06	6.44305e+06	1	818700	2	915	13	1
818800	33	525910	Pukekohe North	1003	Pukekohe Ward	10	Franklin District	02	Auckland Region	2.67919e+06	6.44279e+06	1	818800	10	1206	15	3
819000	9	525910	Pukekohe North	1003	Pukekohe Ward	10	Franklin District	02	Auckland Region	2.67955e+06	6.44278e+06	1	819000	10	1206	4	3
2130100	72	573000	Lambton	4703	Lambton Ward	47	Wellington City	09	Wellington Region	2.65834e+06	5.98881e+06	1	2130100	7	1002	25	2
2130000	72	573000	Lambton	4703	Lambton Ward	47	Wellington City	09	Wellington Region	2.65828e+06	5.98883e+06	1	2130000	7	1002	25	2
2129800	54	573000	Lambton	4703	Lambton Ward	47	Wellington City	09	Wellington Region	2.65819e+06	5.98899e+06	1	2129800	6	998	19	2
2129700	183	573000	Lambton	4703	Lambton Ward	47	Wellington City	09	Wellington Region	2.65843e+06	5.98894e+06	1	2129700	6	988	64	2
2130800	42	573101	Willis Street-Cambridge Terrace	4703	Lambton Ward	47	Wellington City	09	Wellington Region	2.65871e+06	5.98939e+06	1	2130800	6	977	15	2
426100	342	515202	St Marys	701	Western Bays Ward	7	Auckland City	02	Auckland Region	2.66651e+06	6.48236e+06	1	426100	3	928	113	1
2130500	156	573000	Lambton	4703	Lambton Ward	47	Wellington City	09	Wellington Region	2.65833e+06	5.98912e+06	1	2130500	6	988	55	2
2130700	75	573000	Lambton	4703	Lambton Ward	47	Wellington City	09	Wellington Region	2.65849e+06	5.98911e+06	1	2130700	6	988	26	2
2131000	15	573101	Willis Street-Cambridge Terrace	4703	Lambton Ward	47	Wellington City	09	Wellington Region	2.65868e+06	5.98931e+06	1	2131000	10	1176	7	3
425900	63	515202	St Marys	701	Western Bays Ward	7	Auckland City	02	Auckland Region	2.66644e+06	6.48265e+06	1	425900	1	896	21	1
2134000	3	573101	Willis Street-Cambridge Terrace	4703	Lambton Ward	47	Wellington City	09	Wellington Region	2.65867e+06	5.9886e+06	1	2134000	7	1028	1	2
2134300	18	573101	Willis Street-Cambridge Terrace	4703	Lambton Ward	47	Wellington City	09	Wellington Region	2.65863e+06	5.98867e+06	1	2134300	7	1028	6	2
2133800	15	573101	Willis Street-Cambridge Terrace	4703	Lambton Ward	47	Wellington City	09	Wellington Region	2.65887e+06	5.98863e+06	1	2133800	7	1003	5	2
823402	447	525922	Bledisloe Park	1003	Pukekohe Ward	10	Franklin District	02	Auckland Region	2.67926e+06	6.44127e+06	1	823402	2	907	148	1
822402	414	525921	Pukekohe West	1003	Pukekohe Ward	10	Franklin District	02	Auckland Region	2.67855e+06	6.44132e+06	1	822402	1	894	137	1
822408	96	525921	Pukekohe West	1003	Pukekohe Ward	10	Franklin District	02	Auckland Region	2.67874e+06	6.44138e+06	1	822408	5	973	34	2
2527401	144	588500	Kaimahi	6002	Fendalton-Waimairi Ward	60	Christchurch City	13	Canterbury Region	2.4761e+06	5.74759e+06	1	2527401	1	894	48	1
2525800	99	588500	Kaimahi	6002	Fendalton-Waimairi Ward	60	Christchurch City	13	Canterbury Region	2.47671e+06	5.74709e+06	1	2525800	4	948	35	2
2133600	129	573101	Willis Street-Cambridge Terrace	4703	Lambton Ward	47	Wellington City	09	Wellington Region	2.65871e+06	5.98876e+06	1	2133600	6	995	45	2
2525210	159	588500	Kaimahi	6002	Fendalton-Waimairi Ward	60	Christchurch City	13	Canterbury Region	2.47727e+06	5.74701e+06	1	2525210	8	1044	72	3
2132500	12	573101	Willis Street-Cambridge Terrace	4703	Lambton Ward	47	Wellington City	09	Wellington Region	2.65846e+06	5.98855e+06	1	2132500	8	1061	5	3
2525205	198	588500	Kaimahi	6002	Fendalton-Waimairi Ward	60	Christchurch City	13	Canterbury Region	2.47715e+06	5.74681e+06	1	2525205	6	989	69	2
2132000	30	573101	Willis Street-Cambridge Terrace	4703	Lambton Ward	47	Wellington City	09	Wellington Region	2.65847e+06	5.98873e+06	1	2132000	5	959	10	2
2132100	63	573101	Willis Street-Cambridge Terrace	4703	Lambton Ward	47	Wellington City	09	Wellington Region	2.65856e+06	5.98871e+06	1	2132100	5	959	22	2
2131400	138	573101	Willis Street-Cambridge Terrace	4703	Lambton Ward	47	Wellington City	09	Wellington Region	2.65857e+06	5.98907e+06	1	2131400	7	1003	48	2
2131200	177	573101	Willis Street-Cambridge Terrace	4703	Lambton Ward	47	Wellington City	09	Wellington Region	2.65879e+06	5.98924e+06	1	2131200	6	977	62	2
821400	48	525921	Pukekohe West	1003	Pukekohe Ward	10	Franklin District	02	Auckland Region	2.67903e+06	6.443e+06	1	821400	10	1206	22	3
2131700	72	573101	Willis Street-Cambridge Terrace	4703	Lambton Ward	47	Wellington City	09	Wellington Region	2.65856e+06	5.98884e+06	1	2131700	9	1113	32	3
2132200	18	573101	Willis Street-Cambridge Terrace	4703	Lambton Ward	47	Wellington City	09	Wellington Region	2.65844e+06	5.98863e+06	1	2132200	8	1061	8	3
2131800	39	573101	Willis Street-Cambridge Terrace	4703	Lambton Ward	47	Wellington City	09	Wellington Region	2.65864e+06	5.98881e+06	1	2131800	9	1113	18	3
821600	123	525921	Pukekohe West	1003	Pukekohe Ward	10	Franklin District	02	Auckland Region	2.67897e+06	6.4426e+06	1	821600	8	1035	55	3
2132300	27	573101	Willis Street-Cambridge Terrace	4703	Lambton Ward	47	Wellington City	09	Wellington Region	2.65855e+06	5.9886e+06	1	2132300	7	1028	9	2
2132400	9	573101	Willis Street-Cambridge Terrace	4703	Lambton Ward	47	Wellington City	09	Wellington Region	2.65836e+06	5.9886e+06	1	2132400	8	1061	4	3
2525209	129	588500	Kaimahi	6002	Fendalton-Waimairi Ward	60	Christchurch City	13	Canterbury Region	2.47746e+06	5.74691e+06	1	2525209	5	960	45	2
2131900	33	573101	Willis Street-Cambridge Terrace	4703	Lambton Ward	47	Wellington City	09	Wellington Region	2.65839e+06	5.98872e+06	1	2131900	5	959	12	2
2525208	18	588500	Kaimahi	6002	Fendalton-Waimairi Ward	60	Christchurch City	13	Canterbury Region	2.47739e+06	5.74682e+06	1	2525208	6	989	6	2
2525700	159	588500	Kaimahi	6002	Fendalton-Waimairi Ward	60	Christchurch City	13	Canterbury Region	2.47674e+06	5.74731e+06	1	2525700	5	970	56	2
2135100	72	573101	Willis Street-Cambridge Terrace	4703	Lambton Ward	47	Wellington City	09	Wellington Region	2.65859e+06	5.98838e+06	1	2135100	9	1127	32	3
2135600	222	573101	Willis Street-Cambridge Terrace	4703	Lambton Ward	47	Wellington City	09	Wellington Region	2.65909e+06	5.98897e+06	1	2135600	7	1029	78	2
2528703	165	588402	Sawyers Arms	6001	Shirley-Papanui Ward	60	Christchurch City	13	Canterbury Region	2.477e+06	5.74758e+06	1	2528703	1	880	54	1
431600	111	515302	Ponsonby East	701	Western Bays Ward	7	Auckland City	02	Auckland Region	2.66577e+06	6.48151e+06	1	431600	6	982	39	2
431800	111	515302	Ponsonby East	701	Western Bays Ward	7	Auckland City	02	Auckland Region	2.66568e+06	6.48145e+06	1	431800	4	938	39	2
2790800	93	599500	Seaview	6404	Timaru Ward	64	Timaru District	13	Canterbury Region	2.36984e+06	5.64471e+06	1	2790800	7	1002	33	2
431400	54	515302	Ponsonby East	701	Western Bays Ward	7	Auckland City	02	Auckland Region	2.66553e+06	6.48149e+06	1	431400	4	952	19	2
2135900	72	573101	Willis Street-Cambridge Terrace	4703	Lambton Ward	47	Wellington City	09	Wellington Region	2.65908e+06	5.98881e+06	1	2135900	5	964	25	2
2135400	27	573101	Willis Street-Cambridge Terrace	4703	Lambton Ward	47	Wellington City	09	Wellington Region	2.6593e+06	5.98901e+06	1	2135400	5	974	9	2
822500	159	525921	Pukekohe West	1003	Pukekohe Ward	10	Franklin District	02	Auckland Region	2.67852e+06	6.44085e+06	1	822500	2	904	52	1
822900	132	525922	Bledisloe Park	1003	Pukekohe Ward	10	Franklin District	02	Auckland Region	2.67903e+06	6.44095e+06	1	822900	5	966	46	2
824301	18	521113	Buckland	1004	Southern Ward	10	Franklin District	03	Waikato Region	2.68074e+06	6.44058e+06	1	824301	3	926	6	1
2135200	3	573101	Willis Street-Cambridge Terrace	4703	Lambton Ward	47	Wellington City	09	Wellington Region	2.65916e+06	5.98909e+06	1	2135200	5	974	1	2
823100	57	525922	Bledisloe Park	1003	Pukekohe Ward	10	Franklin District	02	Auckland Region	2.67935e+06	6.44255e+06	1	823100	9	1111	26	3
823000	6	525922	Bledisloe Park	1003	Pukekohe Ward	10	Franklin District	02	Auckland Region	2.67919e+06	6.44264e+06	1	823000	9	1111	3	3
823200	72	525922	Bledisloe Park	1003	Pukekohe Ward	10	Franklin District	02	Auckland Region	2.67959e+06	6.44258e+06	1	823200	9	1111	32	3
2528704	63	588402	Sawyers Arms	6001	Shirley-Papanui Ward	60	Christchurch City	13	Canterbury Region	2.47711e+06	5.74748e+06	1	2528704	1	880	21	1
2526300	168	588500	Kaimahi	6002	Fendalton-Waimairi Ward	60	Christchurch City	13	Canterbury Region	2.47637e+06	5.7474e+06	1	2526300	4	942	59	2
2133700	105	573101	Willis Street-Cambridge Terrace	4703	Lambton Ward	47	Wellington City	09	Wellington Region	2.6588e+06	5.98874e+06	1	2133700	7	1003	37	2
2132700	9	573101	Willis Street-Cambridge Terrace	4703	Lambton Ward	47	Wellington City	09	Wellington Region	2.65836e+06	5.98848e+06	1	2132700	8	1061	4	3
823600	15	525922	Bledisloe Park	1003	Pukekohe Ward	10	Franklin District	02	Auckland Region	2.67999e+06	6.44186e+06	1	823600	9	1111	7	3
2526600	123	588500	Kaimahi	6002	Fendalton-Waimairi Ward	60	Christchurch City	13	Canterbury Region	2.47649e+06	5.74721e+06	1	2526600	5	962	43	2
2525900	288	588500	Kaimahi	6002	Fendalton-Waimairi Ward	60	Christchurch City	13	Canterbury Region	2.47691e+06	5.74711e+06	1	2525900	3	932	95	1
2132800	39	573101	Willis Street-Cambridge Terrace	4703	Lambton Ward	47	Wellington City	09	Wellington Region	2.65845e+06	5.98843e+06	1	2132800	8	1061	18	3
823500	24	525922	Bledisloe Park	1003	Pukekohe Ward	10	Franklin District	02	Auckland Region	2.67971e+06	6.44154e+06	1	823500	9	1111	11	3
2134100	273	573101	Willis Street-Cambridge Terrace	4703	Lambton Ward	47	Wellington City	09	Wellington Region	2.65876e+06	5.9886e+06	1	2134100	9	1110	123	3
822405	153	525921	Pukekohe West	1003	Pukekohe Ward	10	Franklin District	02	Auckland Region	2.67882e+06	6.44116e+06	1	822405	6	997	54	2
2527500	96	588500	Kaimahi	6002	Fendalton-Waimairi Ward	60	Christchurch City	13	Canterbury Region	2.4763e+06	5.74757e+06	1	2527500	2	908	32	1
2789200	156	599400	Fraser Park	6404	Timaru Ward	64	Timaru District	13	Canterbury Region	2.36944e+06	5.64451e+06	1	2789200	4	939	55	2
2133900	15	573101	Willis Street-Cambridge Terrace	4703	Lambton Ward	47	Wellington City	09	Wellington Region	2.65898e+06	5.98858e+06	1	2133900	7	1003	5	2
2133500	87	573101	Willis Street-Cambridge Terrace	4703	Lambton Ward	47	Wellington City	09	Wellington Region	2.65876e+06	5.98894e+06	1	2133500	7	1009	30	2
822702	84	525921	Pukekohe West	1003	Pukekohe Ward	10	Franklin District	02	Auckland Region	2.67882e+06	6.44083e+06	1	822702	3	932	28	1
823300	9	525922	Bledisloe Park	1003	Pukekohe Ward	10	Franklin District	02	Auckland Region	2.67972e+06	6.44227e+06	1	823300	4	944	3	2
2526400	162	588500	Kaimahi	6002	Fendalton-Waimairi Ward	60	Christchurch City	13	Canterbury Region	2.47655e+06	5.7474e+06	1	2526400	3	919	53	1
2132900	12	573101	Willis Street-Cambridge Terrace	4703	Lambton Ward	47	Wellington City	09	Wellington Region	2.65829e+06	5.98851e+06	1	2132900	8	1061	5	3
2133300	39	573101	Willis Street-Cambridge Terrace	4703	Lambton Ward	47	Wellington City	09	Wellington Region	2.65885e+06	5.98913e+06	1	2133300	7	1009	14	2
2133400	267	573101	Willis Street-Cambridge Terrace	4703	Lambton Ward	47	Wellington City	09	Wellington Region	2.65886e+06	5.98889e+06	1	2133400	6	992	93	2
2133000	9	573101	Willis Street-Cambridge Terrace	4703	Lambton Ward	47	Wellington City	09	Wellington Region	2.65902e+06	5.98926e+06	1	2133000	7	1009	3	2
2527202	57	588500	Kaimahi	6002	Fendalton-Waimairi Ward	60	Christchurch City	13	Canterbury Region	2.476e+06	5.74781e+06	1	2527202	3	920	19	1
2133200	153	573101	Willis Street-Cambridge Terrace	4703	Lambton Ward	47	Wellington City	09	Wellington Region	2.65894e+06	5.98906e+06	1	2133200	9	1106	69	3
433801	12	514102	Auckland Central West	704	Hobson Ward	7	Auckland City	02	Auckland Region	2.66753e+06	6.48213e+06	1	433801	10	1198	5	3
170812	120	505804	Hatfields Beach	403	Eastern Ward	4	Rodney District	02	Auckland Region	2.66171e+06	6.51304e+06	1	170812	4	938	42	2
2137700	36	576600	Oriental Bay	4703	Lambton Ward	47	Wellington City	09	Wellington Region	2.66034e+06	5.98907e+06	1	2137700	4	937	13	2
695900	144	523401	Grange	802	Papatoetoe Ward	8	Manukau City	02	Auckland Region	2.67522e+06	6.46959e+06	1	695900	6	986	50	2
433003	165	514101	Auckland Harbourside	704	Hobson Ward	7	Auckland City	02	Auckland Region	2.66756e+06	6.48259e+06	1	433003	6	982	58	2
433403	81	514102	Auckland Central West	704	Hobson Ward	7	Auckland City	02	Auckland Region	2.66753e+06	6.48225e+06	1	433403	10	1152	36	3
2791700	66	599500	Seaview	6404	Timaru Ward	64	Timaru District	13	Canterbury Region	2.37024e+06	5.64466e+06	1	2791700	8	1051	30	3
2791500	147	599500	Seaview	6404	Timaru Ward	64	Timaru District	13	Canterbury Region	2.37007e+06	5.64477e+06	1	2791500	8	1051	66	3
433303	306	514102	Auckland Central West	704	Hobson Ward	7	Auckland City	02	Auckland Region	2.6674e+06	6.4823e+06	1	433303	10	1167	138	3
171603	72	505805	Orewa	403	Eastern Ward	4	Rodney District	02	Auckland Region	2.66188e+06	6.51174e+06	1	171603	8	1067	32	3
433102	87	514102	Auckland Central West	704	Hobson Ward	7	Auckland City	02	Auckland Region	2.66777e+06	6.48257e+06	1	433102	9	1103	39	3
433304	87	514102	Auckland Central West	704	Hobson Ward	7	Auckland City	02	Auckland Region	2.66747e+06	6.48228e+06	1	433304	9	1100	39	3
170810	153	505804	Hatfields Beach	403	Eastern Ward	4	Rodney District	02	Auckland Region	2.66178e+06	6.5132e+06	1	170810	6	989	54	2
2791000	126	599500	Seaview	6404	Timaru Ward	64	Timaru District	13	Canterbury Region	2.36987e+06	5.64449e+06	1	2791000	8	1037	57	3
2791100	72	599500	Seaview	6404	Timaru Ward	64	Timaru District	13	Canterbury Region	2.36967e+06	5.64434e+06	1	2791100	5	965	25	2
824400	414	521113	Buckland	1004	Southern Ward	10	Franklin District	03	Waikato Region	2.68112e+06	6.44e+06	1	824400	3	928	137	1
2528802	117	588402	Sawyers Arms	6001	Shirley-Papanui Ward	60	Christchurch City	13	Canterbury Region	2.47701e+06	5.74736e+06	1	2528802	4	935	41	2
2527601	174	588500	Kaimahi	6002	Fendalton-Waimairi Ward	60	Christchurch City	13	Canterbury Region	2.47616e+06	5.74737e+06	1	2527601	2	907	57	1
431900	54	515302	Ponsonby East	701	Western Bays Ward	7	Auckland City	02	Auckland Region	2.66595e+06	6.48147e+06	1	431900	4	938	19	2
2134600	108	573101	Willis Street-Cambridge Terrace	4703	Lambton Ward	47	Wellington City	09	Wellington Region	2.65857e+06	5.98846e+06	1	2134600	9	1127	49	3
2135700	93	573101	Willis Street-Cambridge Terrace	4703	Lambton Ward	47	Wellington City	09	Wellington Region	2.65928e+06	5.98889e+06	1	2135700	5	974	33	2
431300	123	515302	Ponsonby East	701	Western Bays Ward	7	Auckland City	02	Auckland Region	2.66576e+06	6.48156e+06	1	431300	4	950	43	2
823900	78	525922	Bledisloe Park	1003	Pukekohe Ward	10	Franklin District	02	Auckland Region	2.67955e+06	6.4419e+06	1	823900	7	1003	27	2
2528400	57	588402	Sawyers Arms	6001	Shirley-Papanui Ward	60	Christchurch City	13	Canterbury Region	2.47746e+06	5.74727e+06	1	2528400	4	940	20	2
432000	102	515302	Ponsonby East	701	Western Bays Ward	7	Auckland City	02	Auckland Region	2.66579e+06	6.48139e+06	1	432000	3	927	34	1
2134800	177	573101	Willis Street-Cambridge Terrace	4703	Lambton Ward	47	Wellington City	09	Wellington Region	2.65877e+06	5.98843e+06	1	2134800	10	1232	80	3
2528801	60	588402	Sawyers Arms	6001	Shirley-Papanui Ward	60	Christchurch City	13	Canterbury Region	2.47661e+06	5.74757e+06	1	2528801	3	923	20	1
2790700	135	599500	Seaview	6404	Timaru Ward	64	Timaru District	13	Canterbury Region	2.36966e+06	5.64472e+06	1	2790700	5	970	47	2
2135000	9	573101	Willis Street-Cambridge Terrace	4703	Lambton Ward	47	Wellington City	09	Wellington Region	2.65883e+06	5.98836e+06	1	2135000	9	1127	4	3
432100	102	515302	Ponsonby East	701	Western Bays Ward	7	Auckland City	02	Auckland Region	2.66598e+06	6.4814e+06	1	432100	3	921	34	1
2790900	90	599500	Seaview	6404	Timaru Ward	64	Timaru District	13	Canterbury Region	2.36967e+06	5.64453e+06	1	2790900	5	965	31	2
2134400	15	573101	Willis Street-Cambridge Terrace	4703	Lambton Ward	47	Wellington City	09	Wellington Region	2.6586e+06	5.98859e+06	1	2134400	7	1028	5	2
2136000	162	573101	Willis Street-Cambridge Terrace	4703	Lambton Ward	47	Wellington City	09	Wellington Region	2.65922e+06	5.98876e+06	1	2136000	5	962	57	2
2791200	138	599500	Seaview	6404	Timaru Ward	64	Timaru District	13	Canterbury Region	2.36988e+06	5.64428e+06	1	2791200	9	1089	62	3
431500	51	515302	Ponsonby East	701	Western Bays Ward	7	Auckland City	02	Auckland Region	2.66562e+06	6.4815e+06	1	431500	4	952	18	2
2134900	297	573101	Willis Street-Cambridge Terrace	4703	Lambton Ward	47	Wellington City	09	Wellington Region	2.65888e+06	5.98847e+06	1	2134900	8	1033	134	3
2134500	9	573101	Willis Street-Cambridge Terrace	4703	Lambton Ward	47	Wellington City	09	Wellington Region	2.65868e+06	5.98853e+06	1	2134500	7	1028	3	2
2528600	42	588402	Sawyers Arms	6001	Shirley-Papanui Ward	60	Christchurch City	13	Canterbury Region	2.47631e+06	5.74773e+06	1	2528600	1	894	14	1
2136100	24	573101	Willis Street-Cambridge Terrace	4703	Lambton Ward	47	Wellington City	09	Wellington Region	2.65925e+06	5.98866e+06	1	2136100	2	917	8	1
434402	201	514102	Auckland Central West	704	Hobson Ward	7	Auckland City	02	Auckland Region	2.66701e+06	6.48175e+06	1	434402	9	1112	90	3
2794400	9	599500	Seaview	6404	Timaru Ward	64	Timaru District	13	Canterbury Region	2.37042e+06	5.64412e+06	1	2794400	9	1117	4	3
3187801	21	612730	Te Waewae	7305	Riverton Ward	73	Southland District	15	Southland Region	2.12483e+06	5.4166e+06	1	3187801	7	1027	7	2
172401	219	505805	Orewa	403	Eastern Ward	4	Rodney District	02	Auckland Region	2.66242e+06	6.5105e+06	1	172401	10	1148	99	3
2138900	63	573400	Mt Victoria West	4703	Lambton Ward	47	Wellington City	09	Wellington Region	2.65955e+06	5.9889e+06	1	2138900	8	1050	28	3
2138300	132	576600	Oriental Bay	4703	Lambton Ward	47	Wellington City	09	Wellington Region	2.66032e+06	5.98891e+06	1	2138300	3	931	44	1
2138600	81	573400	Mt Victoria West	4703	Lambton Ward	47	Wellington City	09	Wellington Region	2.65977e+06	5.98889e+06	1	2138600	1	888	27	1
2138800	111	573400	Mt Victoria West	4703	Lambton Ward	47	Wellington City	09	Wellington Region	2.65965e+06	5.98899e+06	1	2138800	4	942	39	2
435500	78	514102	Auckland Central West	704	Hobson Ward	7	Auckland City	02	Auckland Region	2.66719e+06	6.48135e+06	1	435500	8	1062	35	3
696803	384	522301	Dingwall	802	Papatoetoe Ward	8	Manukau City	02	Auckland Region	2.67592e+06	6.46945e+06	1	696803	5	955	134	2
696701	21	523401	Grange	802	Papatoetoe Ward	8	Manukau City	02	Auckland Region	2.67539e+06	6.47001e+06	1	696701	10	1283	9	3
434902	36	514102	Auckland Central West	704	Hobson Ward	7	Auckland City	02	Auckland Region	2.66733e+06	6.48159e+06	1	434902	9	1130	16	3
2139000	126	573400	Mt Victoria West	4703	Lambton Ward	47	Wellington City	09	Wellington Region	2.65946e+06	5.98881e+06	1	2139000	6	995	44	2
2138200	147	576600	Oriental Bay	4703	Lambton Ward	47	Wellington City	09	Wellington Region	2.66023e+06	5.98901e+06	1	2138200	3	933	49	1
2138700	69	573400	Mt Victoria West	4703	Lambton Ward	47	Wellington City	09	Wellington Region	2.65973e+06	5.98897e+06	1	2138700	8	1050	31	3
171102	51	505805	Orewa	403	Eastern Ward	4	Rodney District	02	Auckland Region	2.66172e+06	6.51262e+06	1	171102	9	1100	23	3
434401	201	514102	Auckland Central West	704	Hobson Ward	7	Auckland City	02	Auckland Region	2.66709e+06	6.48189e+06	1	434401	8	1037	90	3
433001	60	514101	Auckland Harbourside	704	Hobson Ward	7	Auckland City	02	Auckland Region	2.66762e+06	6.48277e+06	1	433001	4	939	21	2
2792800	6	599500	Seaview	6404	Timaru Ward	64	Timaru District	13	Canterbury Region	2.37067e+06	5.6444e+06	1	2792800	8	1061	3	3
2791900	78	599500	Seaview	6404	Timaru Ward	64	Timaru District	13	Canterbury Region	2.3701e+06	5.64444e+06	1	2791900	6	989	27	2
2792000	33	599500	Seaview	6404	Timaru Ward	64	Timaru District	13	Canterbury Region	2.37029e+06	5.64447e+06	1	2792000	6	989	12	2
2793100	3	599500	Seaview	6404	Timaru Ward	64	Timaru District	13	Canterbury Region	2.37119e+06	5.64418e+06	1	2793100	8	1061	1	3
2792700	66	599500	Seaview	6404	Timaru Ward	64	Timaru District	13	Canterbury Region	2.37076e+06	5.64448e+06	1	2792700	8	1061	30	3
2137000	3	573101	Willis Street-Cambridge Terrace	4703	Lambton Ward	47	Wellington City	09	Wellington Region	2.659e+06	5.9883e+06	1	2137000	8	1052	1	3
170803	162	505804	Hatfields Beach	403	Eastern Ward	4	Rodney District	02	Auckland Region	2.66198e+06	6.51339e+06	1	170803	4	943	57	2
564600	144	518600	Royal Oak	702	Avondale-Roskill Ward	7	Auckland City	02	Auckland Region	2.66738e+06	6.47562e+06	1	564600	4	949	50	2
433402	246	514102	Auckland Central West	704	Hobson Ward	7	Auckland City	02	Auckland Region	2.66756e+06	6.48229e+06	1	433402	10	1213	111	3
433501	84	514102	Auckland Central West	704	Hobson Ward	7	Auckland City	02	Auckland Region	2.66779e+06	6.48233e+06	1	433501	10	1188	38	3
433502	132	514102	Auckland Central West	704	Hobson Ward	7	Auckland City	02	Auckland Region	2.66775e+06	6.48228e+06	1	433502	10	1161	59	3
3185900	12	612740	Fairfax	7305	Riverton Ward	73	Southland District	15	Southland Region	2.12742e+06	5.41793e+06	1	3185900	5	960	4	2
2136600	51	573101	Willis Street-Cambridge Terrace	4703	Lambton Ward	47	Wellington City	09	Wellington Region	2.65906e+06	5.9885e+06	1	2136600	8	1052	23	3
2136400	216	573101	Willis Street-Cambridge Terrace	4703	Lambton Ward	47	Wellington City	09	Wellington Region	2.65902e+06	5.98866e+06	1	2136400	6	991	76	2
564700	114	518600	Royal Oak	702	Avondale-Roskill Ward	7	Auckland City	02	Auckland Region	2.6675e+06	6.47557e+06	1	564700	3	932	38	1
433301	333	514102	Auckland Central West	704	Hobson Ward	7	Auckland City	02	Auckland Region	2.66746e+06	6.48238e+06	1	433301	8	1041	150	3
433503	111	514102	Auckland Central West	704	Hobson Ward	7	Auckland City	02	Auckland Region	2.66782e+06	6.48224e+06	1	433503	10	1188	50	3
170811	96	505804	Hatfields Beach	403	Eastern Ward	4	Rodney District	02	Auckland Region	2.66157e+06	6.51315e+06	1	170811	4	938	34	2
2136700	21	573101	Willis Street-Cambridge Terrace	4703	Lambton Ward	47	Wellington City	09	Wellington Region	2.65916e+06	5.98843e+06	1	2136700	8	1052	9	3
433103	135	514102	Auckland Central West	704	Hobson Ward	7	Auckland City	02	Auckland Region	2.66769e+06	6.48244e+06	1	433103	9	1103	61	3
171400	93	505805	Orewa	403	Eastern Ward	4	Rodney District	02	Auckland Region	2.66206e+06	6.51181e+06	1	171400	4	943	33	2
2137600	174	576600	Oriental Bay	4703	Lambton Ward	47	Wellington City	09	Wellington Region	2.66049e+06	5.98904e+06	1	2137600	4	937	61	2
2137400	75	576600	Oriental Bay	4703	Lambton Ward	47	Wellington City	09	Wellington Region	2.66059e+06	5.98927e+06	1	2137400	1	885	25	1
432200	123	515302	Ponsonby East	701	Western Bays Ward	7	Auckland City	02	Auckland Region	2.66571e+06	6.4813e+06	1	432200	2	908	41	1
695800	189	523401	Grange	802	Papatoetoe Ward	8	Manukau City	02	Auckland Region	2.67539e+06	6.46955e+06	1	695800	8	1037	85	3
171500	183	505805	Orewa	403	Eastern Ward	4	Rodney District	02	Auckland Region	2.66204e+06	6.51156e+06	1	171500	9	1101	82	3
2792500	18	599500	Seaview	6404	Timaru Ward	64	Timaru District	13	Canterbury Region	2.37037e+06	5.6447e+06	1	2792500	8	1051	8	3
432300	69	515302	Ponsonby East	701	Western Bays Ward	7	Auckland City	02	Auckland Region	2.66597e+06	6.48133e+06	1	432300	3	921	23	1
433005	54	514101	Auckland Harbourside	704	Hobson Ward	7	Auckland City	02	Auckland Region	2.66743e+06	6.48264e+06	1	433005	1	888	18	1
433802	135	514102	Auckland Central West	704	Hobson Ward	7	Auckland City	02	Auckland Region	2.66758e+06	6.4821e+06	1	433802	10	1198	61	3
2136200	84	573101	Willis Street-Cambridge Terrace	4703	Lambton Ward	47	Wellington City	09	Wellington Region	2.65922e+06	5.98862e+06	1	2136200	2	917	28	1
2792100	9	599500	Seaview	6404	Timaru Ward	64	Timaru District	13	Canterbury Region	2.37043e+06	5.64445e+06	1	2792100	8	1061	4	3
2791600	123	599500	Seaview	6404	Timaru Ward	64	Timaru District	13	Canterbury Region	2.37003e+06	5.64467e+06	1	2791600	7	1014	43	2
2791800	99	599500	Seaview	6404	Timaru Ward	64	Timaru District	13	Canterbury Region	2.37009e+06	5.64455e+06	1	2791800	5	958	35	2
433600	33	514102	Auckland Central West	704	Hobson Ward	7	Auckland City	02	Auckland Region	2.66775e+06	6.48219e+06	1	433600	10	1152	15	3
171103	69	505805	Orewa	403	Eastern Ward	4	Rodney District	02	Auckland Region	2.66175e+06	6.51247e+06	1	171103	9	1100	31	3
171601	78	505805	Orewa	403	Eastern Ward	4	Rodney District	02	Auckland Region	2.66189e+06	6.51194e+06	1	171601	8	1067	35	3
2136900	3	573101	Willis Street-Cambridge Terrace	4703	Lambton Ward	47	Wellington City	09	Wellington Region	2.65912e+06	5.98834e+06	1	2136900	8	1052	1	3
2136500	60	573101	Willis Street-Cambridge Terrace	4703	Lambton Ward	47	Wellington City	09	Wellington Region	2.65914e+06	5.98854e+06	1	2136500	8	1052	27	3
433101	105	514102	Auckland Central West	704	Hobson Ward	7	Auckland City	02	Auckland Region	2.66768e+06	6.48258e+06	1	433101	8	1049	47	3
432700	60	514102	Auckland Central West	704	Hobson Ward	7	Auckland City	02	Auckland Region	2.66696e+06	6.4821e+06	1	432700	7	1001	21	2
432900	135	514101	Auckland Harbourside	704	Hobson Ward	7	Auckland City	02	Auckland Region	2.6679e+06	6.48259e+06	1	432900	7	1023	47	2
433401	9	514102	Auckland Central West	704	Hobson Ward	7	Auckland City	02	Auckland Region	2.66763e+06	6.48228e+06	1	433401	10	1152	4	3
170900	165	505804	Hatfields Beach	403	Eastern Ward	4	Rodney District	02	Auckland Region	2.66195e+06	6.51299e+06	1	170900	6	976	58	2
433200	201	514102	Auckland Central West	704	Hobson Ward	7	Auckland City	02	Auckland Region	2.66787e+06	6.48246e+06	1	433200	10	1168	90	3
2792200	54	599500	Seaview	6404	Timaru Ward	64	Timaru District	13	Canterbury Region	2.37018e+06	5.64433e+06	1	2792200	6	989	19	2
2792300	27	599500	Seaview	6404	Timaru Ward	64	Timaru District	13	Canterbury Region	2.37035e+06	5.64433e+06	1	2792300	8	1061	12	3
2793000	15	599500	Seaview	6404	Timaru Ward	64	Timaru District	13	Canterbury Region	2.37092e+06	5.64425e+06	1	2793000	8	1061	7	3
433302	258	514102	Auckland Central West	704	Hobson Ward	7	Auckland City	02	Auckland Region	2.66751e+06	6.48231e+06	1	433302	7	1010	90	2
432600	312	514102	Auckland Central West	704	Hobson Ward	7	Auckland City	02	Auckland Region	2.66725e+06	6.48238e+06	1	432600	7	1008	109	2
432800	15	514101	Auckland Harbourside	704	Hobson Ward	7	Auckland City	02	Auckland Region	2.66778e+06	6.48274e+06	1	432800	10	1188	7	3
2136300	150	573101	Willis Street-Cambridge Terrace	4703	Lambton Ward	47	Wellington City	09	Wellington Region	2.6589e+06	5.9887e+06	1	2136300	5	964	52	2
2137500	123	576600	Oriental Bay	4703	Lambton Ward	47	Wellington City	09	Wellington Region	2.66052e+06	5.98914e+06	1	2137500	3	930	41	1
695700	96	523401	Grange	802	Papatoetoe Ward	8	Manukau City	02	Auckland Region	2.67523e+06	6.46981e+06	1	695700	10	1213	43	3
170809	78	505804	Hatfields Beach	403	Eastern Ward	4	Rodney District	02	Auckland Region	2.66179e+06	6.51346e+06	1	170809	5	957	27	2
433006	57	514101	Auckland Harbourside	704	Hobson Ward	7	Auckland City	02	Auckland Region	2.66749e+06	6.48269e+06	1	433006	1	888	19	1
433700	93	514102	Auckland Central West	704	Hobson Ward	7	Auckland City	02	Auckland Region	2.6673e+06	6.48217e+06	1	433700	9	1100	42	3
2136800	9	573101	Willis Street-Cambridge Terrace	4703	Lambton Ward	47	Wellington City	09	Wellington Region	2.65899e+06	5.9884e+06	1	2136800	8	1052	4	3
171602	141	505805	Orewa	403	Eastern Ward	4	Rodney District	02	Auckland Region	2.66181e+06	6.51168e+06	1	171602	7	1016	49	2
171000	45	505804	Hatfields Beach	403	Eastern Ward	4	Rodney District	02	Auckland Region	2.66158e+06	6.51295e+06	1	171000	6	976	16	2
171200	216	505805	Orewa	403	Eastern Ward	4	Rodney District	02	Auckland Region	2.66188e+06	6.51222e+06	1	171200	7	1020	76	2
2795700	33	599500	Seaview	6404	Timaru Ward	64	Timaru District	13	Canterbury Region	2.37075e+06	5.64392e+06	1	2795700	10	1145	15	3
2795400	9	599500	Seaview	6404	Timaru Ward	64	Timaru District	13	Canterbury Region	2.37084e+06	5.644e+06	1	2795400	10	1145	4	3
2795500	9	599500	Seaview	6404	Timaru Ward	64	Timaru District	13	Canterbury Region	2.37098e+06	5.64405e+06	1	2795500	10	1145	4	3
567401	99	518702	Hillsborough East	702	Avondale-Roskill Ward	7	Auckland City	02	Auckland Region	2.66749e+06	6.47536e+06	1	567401	3	924	33	1
2140900	60	573400	Mt Victoria West	4703	Lambton Ward	47	Wellington City	09	Wellington Region	2.65976e+06	5.98842e+06	1	2140900	4	952	21	2
567300	27	518600	Royal Oak	706	Tamaki-Maungakiekie Ward	7	Auckland City	02	Auckland Region	2.66849e+06	6.47531e+06	1	567300	2	911	9	1
2140600	99	573400	Mt Victoria West	4703	Lambton Ward	47	Wellington City	09	Wellington Region	2.65962e+06	5.98864e+06	1	2140600	6	997	35	2
304500	60	507900	Westlake	502	Central Ward	5	North Shore City	02	Auckland Region	2.6674e+06	6.48921e+06	1	304500	5	973	21	2
2140100	90	573400	Mt Victoria West	4703	Lambton Ward	47	Wellington City	09	Wellington Region	2.65971e+06	5.98883e+06	1	2140100	5	956	31	2
567200	114	518600	Royal Oak	706	Tamaki-Maungakiekie Ward	7	Auckland City	02	Auckland Region	2.66822e+06	6.47528e+06	1	567200	2	911	38	1
172502	186	505802	Red Beach	403	Eastern Ward	4	Rodney District	02	Auckland Region	2.66192e+06	6.50962e+06	1	172502	4	941	65	2
435202	27	514102	Auckland Central West	704	Hobson Ward	7	Auckland City	02	Auckland Region	2.66745e+06	6.48153e+06	1	435202	1	894	9	1
303502	144	507900	Westlake	502	Central Ward	5	North Shore City	02	Auckland Region	2.66713e+06	6.48906e+06	1	303502	7	1002	50	2
434000	24	514102	Auckland Central West	704	Hobson Ward	7	Auckland City	02	Auckland Region	2.66774e+06	6.48201e+06	1	434000	1	894	8	1
2139400	105	573400	Mt Victoria West	4703	Lambton Ward	47	Wellington City	09	Wellington Region	2.65972e+06	5.98873e+06	1	2139400	5	971	37	2
435300	9	514102	Auckland Central West	704	Hobson Ward	7	Auckland City	02	Auckland Region	2.66739e+06	6.48148e+06	1	435300	5	958	3	2
435400	15	514102	Auckland Central West	704	Hobson Ward	7	Auckland City	02	Auckland Region	2.66729e+06	6.48134e+06	1	435400	5	958	5	2
434403	180	514102	Auckland Central West	704	Hobson Ward	7	Auckland City	02	Auckland Region	2.66712e+06	6.48171e+06	1	434403	7	1001	63	2
433900	54	514102	Auckland Central West	704	Hobson Ward	7	Auckland City	02	Auckland Region	2.66767e+06	6.48208e+06	1	433900	1	894	18	1
2139100	33	573400	Mt Victoria West	4703	Lambton Ward	47	Wellington City	09	Wellington Region	2.65997e+06	5.98894e+06	1	2139100	3	933	11	1
435100	48	514102	Auckland Central West	704	Hobson Ward	7	Auckland City	02	Auckland Region	2.66727e+06	6.48145e+06	1	435100	10	1353	22	3
565100	207	518600	Royal Oak	702	Avondale-Roskill Ward	7	Auckland City	02	Auckland Region	2.66765e+06	6.47553e+06	1	565100	2	913	68	1
565300	102	518600	Royal Oak	702	Avondale-Roskill Ward	7	Auckland City	02	Auckland Region	2.66801e+06	6.47552e+06	1	565300	3	921	34	1
565400	162	518600	Royal Oak	702	Avondale-Roskill Ward	7	Auckland City	02	Auckland Region	2.66799e+06	6.47538e+06	1	565400	5	963	57	2
435201	99	514102	Auckland Central West	704	Hobson Ward	7	Auckland City	02	Auckland Region	2.66756e+06	6.48153e+06	1	435201	9	1109	45	3
434500	213	514102	Auckland Central West	704	Hobson Ward	7	Auckland City	02	Auckland Region	2.66725e+06	6.4818e+06	1	434500	10	1204	96	3
434601	57	514102	Auckland Central West	704	Hobson Ward	7	Auckland City	02	Auckland Region	2.6672e+06	6.48178e+06	1	434601	8	1059	26	3
435000	189	514102	Auckland Central West	704	Hobson Ward	7	Auckland City	02	Auckland Region	2.66743e+06	6.48159e+06	1	435000	10	1353	85	3
3187802	78	612802	Riverton West	7305	Riverton Ward	73	Southland District	15	Southland Region	2.12502e+06	5.41684e+06	1	3187802	7	1027	27	2
2147700	114	573300	Mt Cook-Wallace Street	4703	Lambton Ward	47	Wellington City	09	Wellington Region	2.65848e+06	5.98739e+06	1	2147700	4	947	40	2
2139300	132	573400	Mt Victoria West	4703	Lambton Ward	47	Wellington City	09	Wellington Region	2.65984e+06	5.98883e+06	1	2139300	3	932	44	1
2138400	60	573400	Mt Victoria West	4703	Lambton Ward	47	Wellington City	09	Wellington Region	2.65984e+06	5.98904e+06	1	2138400	1	888	20	1
2137800	48	576600	Oriental Bay	4703	Lambton Ward	47	Wellington City	09	Wellington Region	2.66032e+06	5.98901e+06	1	2137800	1	885	16	1
172402	177	505805	Orewa	403	Eastern Ward	4	Rodney District	02	Auckland Region	2.66225e+06	6.51051e+06	1	172402	8	1033	80	3
696000	168	523401	Grange	802	Papatoetoe Ward	8	Manukau City	02	Auckland Region	2.67516e+06	6.46947e+06	1	696000	5	955	59	2
303600	198	507900	Westlake	502	Central Ward	5	North Shore City	02	Auckland Region	2.66721e+06	6.48883e+06	1	303600	5	968	69	2
434101	204	514102	Auckland Central West	704	Hobson Ward	7	Auckland City	02	Auckland Region	2.66734e+06	6.48204e+06	1	434101	9	1102	92	3
2138500	108	573400	Mt Victoria West	4703	Lambton Ward	47	Wellington City	09	Wellington Region	2.65987e+06	5.98897e+06	1	2138500	3	930	36	1
434602	228	514102	Auckland Central West	704	Hobson Ward	7	Auckland City	02	Auckland Region	2.66724e+06	6.48171e+06	1	434602	8	1059	103	3
434802	81	514102	Auckland Central West	704	Hobson Ward	7	Auckland City	02	Auckland Region	2.66725e+06	6.48159e+06	1	434802	9	1130	36	3
565200	147	518600	Royal Oak	702	Avondale-Roskill Ward	7	Auckland City	02	Auckland Region	2.66782e+06	6.47551e+06	1	565200	4	952	51	2
2793800	114	599500	Seaview	6404	Timaru Ward	64	Timaru District	13	Canterbury Region	2.37003e+06	5.64426e+06	1	2793800	9	1095	51	3
434200	126	514102	Auckland Central West	704	Hobson Ward	7	Auckland City	02	Auckland Region	2.66746e+06	6.48192e+06	1	434200	9	1109	57	3
172201	252	505805	Orewa	403	Eastern Ward	4	Rodney District	02	Auckland Region	2.66227e+06	6.5109e+06	1	172201	9	1089	113	3
434801	66	514102	Auckland Central West	704	Hobson Ward	7	Auckland City	02	Auckland Region	2.66731e+06	6.48164e+06	1	434801	9	1130	30	3
172202	153	505805	Orewa	403	Eastern Ward	4	Rodney District	02	Auckland Region	2.66218e+06	6.51076e+06	1	172202	7	1008	54	2
2138000	84	576600	Oriental Bay	4703	Lambton Ward	47	Wellington City	09	Wellington Region	2.66004e+06	5.98896e+06	1	2138000	7	1006	29	2
2138100	120	576600	Oriental Bay	4703	Lambton Ward	47	Wellington City	09	Wellington Region	2.66012e+06	5.98901e+06	1	2138100	2	902	40	1
434701	123	514102	Auckland Central West	704	Hobson Ward	7	Auckland City	02	Auckland Region	2.66733e+06	6.48173e+06	1	434701	9	1130	55	3
172100	441	505805	Orewa	403	Eastern Ward	4	Rodney District	02	Auckland Region	2.66216e+06	6.51122e+06	1	172100	7	1021	154	2
2793600	6	599500	Seaview	6404	Timaru Ward	64	Timaru District	13	Canterbury Region	2.37107e+06	5.64404e+06	1	2793600	8	1061	3	3
172300	177	505805	Orewa	403	Eastern Ward	4	Rodney District	02	Auckland Region	2.66213e+06	6.51043e+06	1	172300	7	1025	62	2
2137900	171	576600	Oriental Bay	4703	Lambton Ward	47	Wellington City	09	Wellington Region	2.65998e+06	5.98907e+06	1	2137900	3	921	56	1
434102	1431	514102	Auckland Central West	704	Hobson Ward	7	Auckland City	02	Auckland Region	2.66732e+06	6.48193e+06	1	434102	10	1189	644	3
434702	96	514102	Auckland Central West	704	Hobson Ward	7	Auckland City	02	Auckland Region	2.66731e+06	6.48174e+06	1	434702	9	1130	43	3
172501	108	505802	Red Beach	403	Eastern Ward	4	Rodney District	02	Auckland Region	2.66177e+06	6.5097e+06	1	172501	4	942	38	2
438214	261	514101	Auckland Harbourside	704	Hobson Ward	7	Auckland City	02	Auckland Region	2.6689e+06	6.48228e+06	1	438214	6	982	91	2
3190800	18	612801	Riverton East	7305	Riverton Ward	73	Southland District	15	Southland Region	2.12632e+06	5.417e+06	1	3190800	9	1089	8	3
3190700	72	612801	Riverton East	7305	Riverton Ward	73	Southland District	15	Southland Region	2.12665e+06	5.41724e+06	1	3190700	8	1035	32	3
3190600	36	612801	Riverton East	7305	Riverton Ward	73	Southland District	15	Southland Region	2.12656e+06	5.41727e+06	1	3190600	8	1035	16	3
2142300	75	573400	Mt Victoria West	4703	Lambton Ward	47	Wellington City	09	Wellington Region	2.65963e+06	5.98815e+06	1	2142300	5	956	26	2
2142600	99	573400	Mt Victoria West	4703	Lambton Ward	47	Wellington City	09	Wellington Region	2.65944e+06	5.98814e+06	1	2142600	5	962	35	2
2141600	81	573400	Mt Victoria West	4703	Lambton Ward	47	Wellington City	09	Wellington Region	2.65964e+06	5.9884e+06	1	2141600	5	957	28	2
962500	186	527501	Cambridge North	1702	Cambridge Ward	17	Waipa District	03	Waikato Region	2.72718e+06	6.36564e+06	1	962500	3	927	61	1
961600	156	527501	Cambridge North	1702	Cambridge Ward	17	Waipa District	03	Waikato Region	2.72773e+06	6.36562e+06	1	961600	2	912	51	1
961500	147	527501	Cambridge North	1702	Cambridge Ward	17	Waipa District	03	Waikato Region	2.72751e+06	6.3656e+06	1	961500	5	960	51	2
962000	69	527503	Cambridge Central	1702	Cambridge Ward	17	Waipa District	03	Waikato Region	2.72832e+06	6.36566e+06	1	962000	6	977	24	2
438103	18	514101	Auckland Harbourside	704	Hobson Ward	7	Auckland City	02	Auckland Region	2.6682e+06	6.4826e+06	1	438103	8	1060	8	3
3189800	102	612802	Riverton West	7305	Riverton Ward	73	Southland District	15	Southland Region	2.12574e+06	5.41633e+06	1	3189800	6	996	36	2
3191100	18	612801	Riverton East	7305	Riverton Ward	73	Southland District	15	Southland Region	2.12619e+06	5.41672e+06	1	3191100	9	1089	8	3
3189700	90	612802	Riverton West	7305	Riverton Ward	73	Southland District	15	Southland Region	2.12545e+06	5.41644e+06	1	3189700	4	937	31	2
2142200	72	573400	Mt Victoria West	4703	Lambton Ward	47	Wellington City	09	Wellington Region	2.65959e+06	5.98806e+06	1	2142200	5	956	25	2
2142700	21	573400	Mt Victoria West	4703	Lambton Ward	47	Wellington City	09	Wellington Region	2.65945e+06	5.98806e+06	1	2142700	5	962	7	2
438210	3	514101	Auckland Harbourside	704	Hobson Ward	7	Auckland City	02	Auckland Region	2.6686e+06	6.48262e+06	1	438210	6	982	1	2
438213	150	514101	Auckland Harbourside	704	Hobson Ward	7	Auckland City	02	Auckland Region	2.66846e+06	6.48248e+06	1	438213	5	956	52	2
438203	30	514103	Auckland Central East	704	Hobson Ward	7	Auckland City	02	Auckland Region	2.66862e+06	6.4819e+06	1	438203	8	1059	14	3
567402	39	518702	Hillsborough East	702	Avondale-Roskill Ward	7	Auckland City	02	Auckland Region	2.66748e+06	6.47519e+06	1	567402	3	924	13	1
568200	102	518701	Hillsborough West	702	Avondale-Roskill Ward	7	Auckland City	02	Auckland Region	2.66685e+06	6.47532e+06	1	568200	7	1011	36	2
567900	216	518702	Hillsborough East	706	Tamaki-Maungakiekie Ward	7	Auckland City	02	Auckland Region	2.66813e+06	6.4749e+06	1	567900	4	940	76	2
2140500	120	573400	Mt Victoria West	4703	Lambton Ward	47	Wellington City	09	Wellington Region	2.65957e+06	5.98853e+06	1	2140500	5	972	42	2
2141001	114	573400	Mt Victoria West	4703	Lambton Ward	47	Wellington City	09	Wellington Region	2.65982e+06	5.98851e+06	1	2141001	4	952	40	2
2139900	123	573400	Mt Victoria West	4703	Lambton Ward	47	Wellington City	09	Wellington Region	2.65954e+06	5.98876e+06	1	2139900	6	980	43	2
567100	87	518600	Royal Oak	706	Tamaki-Maungakiekie Ward	7	Auckland City	02	Auckland Region	2.66825e+06	6.47538e+06	1	567100	4	938	30	2
2139700	126	573400	Mt Victoria West	4703	Lambton Ward	47	Wellington City	09	Wellington Region	2.65941e+06	5.98869e+06	1	2139700	6	997	44	2
567500	171	518702	Hillsborough East	702	Avondale-Roskill Ward	7	Auckland City	02	Auckland Region	2.66735e+06	6.4752e+06	1	567500	2	908	56	1
2795900	24	599500	Seaview	6404	Timaru Ward	64	Timaru District	13	Canterbury Region	2.37104e+06	5.64387e+06	1	2795900	10	1145	11	3
2795600	3	599500	Seaview	6404	Timaru Ward	64	Timaru District	13	Canterbury Region	2.37064e+06	5.64387e+06	1	2795600	10	1145	1	3
2795800	15	599500	Seaview	6404	Timaru Ward	64	Timaru District	13	Canterbury Region	2.37089e+06	5.64384e+06	1	2795800	10	1145	7	3
305202	3	507900	Westlake	502	Central Ward	5	North Shore City	02	Auckland Region	2.66694e+06	6.48934e+06	1	305202	2	916	1	1
2148100	48	576500	Adelaide	4703	Lambton Ward	47	Wellington City	09	Wellington Region	2.65902e+06	5.98779e+06	1	2148100	6	985	17	2
2140200	138	573400	Mt Victoria West	4703	Lambton Ward	47	Wellington City	09	Wellington Region	2.65962e+06	5.98886e+06	1	2140200	6	992	48	2
304600	129	507900	Westlake	502	Central Ward	5	North Shore City	02	Auckland Region	2.66743e+06	6.48907e+06	1	304600	5	973	45	2
2140700	126	573400	Mt Victoria West	4703	Lambton Ward	47	Wellington City	09	Wellington Region	2.65973e+06	5.98859e+06	1	2140700	5	961	44	2
2140400	78	573400	Mt Victoria West	4703	Lambton Ward	47	Wellington City	09	Wellington Region	2.6595e+06	5.9886e+06	1	2140400	8	1032	35	3
2140300	60	573400	Mt Victoria West	4703	Lambton Ward	47	Wellington City	09	Wellington Region	2.65938e+06	5.98859e+06	1	2140300	8	1032	27	3
567800	198	518702	Hillsborough East	702	Avondale-Roskill Ward	7	Auckland City	02	Auckland Region	2.66792e+06	6.47492e+06	1	567800	7	1024	69	2
2794900	3	599500	Seaview	6404	Timaru Ward	64	Timaru District	13	Canterbury Region	2.37051e+06	5.64427e+06	1	2794900	10	1145	1	3
2140800	129	573400	Mt Victoria West	4703	Lambton Ward	47	Wellington City	09	Wellington Region	2.65968e+06	5.98848e+06	1	2140800	6	995	45	2
2139500	87	573400	Mt Victoria West	4703	Lambton Ward	47	Wellington City	09	Wellington Region	2.65978e+06	5.98868e+06	1	2139500	5	961	30	2
2140002	123	573400	Mt Victoria West	4703	Lambton Ward	47	Wellington City	09	Wellington Region	2.65966e+06	5.98873e+06	1	2140002	7	1019	43	2
2795300	3	599500	Seaview	6404	Timaru Ward	64	Timaru District	13	Canterbury Region	2.37077e+06	5.64414e+06	1	2795300	10	1145	1	3
2795100	12	599500	Seaview	6404	Timaru Ward	64	Timaru District	13	Canterbury Region	2.37052e+06	5.64407e+06	1	2795100	10	1145	5	3
567000	138	518600	Royal Oak	706	Tamaki-Maungakiekie Ward	7	Auckland City	02	Auckland Region	2.66829e+06	6.47548e+06	1	567000	4	938	48	2
2139800	126	573400	Mt Victoria West	4703	Lambton Ward	47	Wellington City	09	Wellington Region	2.65953e+06	5.98868e+06	1	2139800	5	960	44	2
567600	192	518702	Hillsborough East	702	Avondale-Roskill Ward	7	Auckland City	02	Auckland Region	2.66786e+06	6.47524e+06	1	567600	4	947	67	2
960002	114	527502	Cambridge West	1703	Maungatautari Ward	17	Waipa District	03	Waikato Region	2.72588e+06	6.36535e+06	1	960002	6	988	40	2
963500	162	527502	Cambridge West	1702	Cambridge Ward	17	Waipa District	03	Waikato Region	2.72634e+06	6.36555e+06	1	963500	4	948	57	2
963800	87	527502	Cambridge West	1702	Cambridge Ward	17	Waipa District	03	Waikato Region	2.72694e+06	6.36558e+06	1	963800	3	933	29	1
963600	144	527502	Cambridge West	1702	Cambridge Ward	17	Waipa District	03	Waikato Region	2.72658e+06	6.36556e+06	1	963600	4	949	50	2
2170300	42	576400	Newtown East	4705	Southern Ward	47	Wellington City	09	Wellington Region	2.65914e+06	5.98612e+06	1	2170300	6	984	15	2
2170400	129	576400	Newtown East	4705	Southern Ward	47	Wellington City	09	Wellington Region	2.65926e+06	5.9862e+06	1	2170400	10	1149	58	3
2142900	6	573400	Mt Victoria West	4703	Lambton Ward	47	Wellington City	09	Wellington Region	2.65925e+06	5.98808e+06	1	2142900	8	1064	3	3
964000	123	527502	Cambridge West	1702	Cambridge Ward	17	Waipa District	03	Waikato Region	2.72634e+06	6.3653e+06	1	964000	8	1064	55	3
963700	99	527502	Cambridge West	1702	Cambridge Ward	17	Waipa District	03	Waikato Region	2.72658e+06	6.3653e+06	1	963700	3	933	33	1
964400	117	527502	Cambridge West	1702	Cambridge Ward	17	Waipa District	03	Waikato Region	2.72705e+06	6.36506e+06	1	964400	9	1082	53	3
2799300	15	599700	Parkside	6404	Timaru Ward	64	Timaru District	13	Canterbury Region	2.37102e+06	5.6437e+06	1	2799300	8	1071	7	3
2799200	63	599700	Parkside	6404	Timaru Ward	64	Timaru District	13	Canterbury Region	2.37067e+06	5.6437e+06	1	2799200	10	1145	28	3
569100	195	518701	Hillsborough West	702	Avondale-Roskill Ward	7	Auckland City	02	Auckland Region	2.66727e+06	6.47529e+06	1	569100	6	986	68	2
438301	18	514103	Auckland Central East	704	Hobson Ward	7	Auckland City	02	Auckland Region	2.66844e+06	6.48238e+06	1	438301	8	1059	8	3
3190100	120	612802	Riverton West	7305	Riverton Ward	73	Southland District	15	Southland Region	2.12658e+06	5.41588e+06	1	3190100	3	919	40	1
3190000	162	612802	Riverton West	7305	Riverton Ward	73	Southland District	15	Southland Region	2.12613e+06	5.41594e+06	1	3190000	4	938	57	2
438209	243	514101	Auckland Harbourside	704	Hobson Ward	7	Auckland City	02	Auckland Region	2.66783e+06	6.48298e+06	1	438209	6	982	85	2
438501	39	514103	Auckland Central East	704	Hobson Ward	7	Auckland City	02	Auckland Region	2.6683e+06	6.48225e+06	1	438501	7	1022	14	2
438107	276	514103	Auckland Central East	704	Hobson Ward	7	Auckland City	02	Auckland Region	2.66828e+06	6.48244e+06	1	438107	8	1031	124	3
438305	303	514103	Auckland Central East	704	Hobson Ward	7	Auckland City	02	Auckland Region	2.66859e+06	6.48203e+06	1	438305	10	1298	136	3
3190201	87	612802	Riverton West	7305	Riverton Ward	73	Southland District	15	Southland Region	2.12624e+06	5.41538e+06	1	3190201	5	959	30	2
2141900	78	573400	Mt Victoria West	4703	Lambton Ward	47	Wellington City	09	Wellington Region	2.65971e+06	5.98827e+06	1	2141900	3	930	26	1
438404	102	514103	Auckland Central East	704	Hobson Ward	7	Auckland City	02	Auckland Region	2.66834e+06	6.48243e+06	1	438404	5	973	36	2
962200	294	527501	Cambridge North	1702	Cambridge Ward	17	Waipa District	03	Waikato Region	2.72713e+06	6.36606e+06	1	962200	4	939	103	2
3190500	66	612801	Riverton East	7305	Riverton Ward	73	Southland District	15	Southland Region	2.12696e+06	5.41765e+06	1	3190500	8	1035	30	3
3190400	12	612801	Riverton East	7305	Riverton Ward	73	Southland District	15	Southland Region	2.12667e+06	5.41769e+06	1	3190400	9	1089	5	3
2141400	93	573400	Mt Victoria West	4703	Lambton Ward	47	Wellington City	09	Wellington Region	2.65955e+06	5.98844e+06	1	2141400	7	1000	33	2
961700	216	527501	Cambridge North	1702	Cambridge Ward	17	Waipa District	03	Waikato Region	2.72794e+06	6.36578e+06	1	961700	4	949	76	2
962100	132	527501	Cambridge North	1702	Cambridge Ward	17	Waipa District	03	Waikato Region	2.72772e+06	6.36586e+06	1	962100	6	977	46	2
961800	180	527501	Cambridge North	1702	Cambridge Ward	17	Waipa District	03	Waikato Region	2.72817e+06	6.36585e+06	1	961800	7	1003	63	2
962400	138	527501	Cambridge North	1702	Cambridge Ward	17	Waipa District	03	Waikato Region	2.72728e+06	6.36584e+06	1	962400	5	959	48	2
962300	129	527501	Cambridge North	1702	Cambridge Ward	17	Waipa District	03	Waikato Region	2.72706e+06	6.36583e+06	1	962300	8	1042	58	3
3191300	156	612801	Riverton East	7305	Riverton Ward	73	Southland District	15	Southland Region	2.12647e+06	5.41669e+06	1	3191300	9	1073	70	3
3190900	18	612801	Riverton East	7305	Riverton Ward	73	Southland District	15	Southland Region	2.12637e+06	5.41695e+06	1	3190900	9	1089	8	3
3191000	6	612801	Riverton East	7305	Riverton Ward	73	Southland District	15	Southland Region	2.12618e+06	5.41683e+06	1	3191000	9	1089	3	3
2142100	108	573400	Mt Victoria West	4703	Lambton Ward	47	Wellington City	09	Wellington Region	2.65951e+06	5.98807e+06	1	2142100	7	1000	38	2
2141500	114	573400	Mt Victoria West	4703	Lambton Ward	47	Wellington City	09	Wellington Region	2.65951e+06	5.98836e+06	1	2141500	7	1000	40	2
438302	18	514103	Auckland Central East	704	Hobson Ward	7	Auckland City	02	Auckland Region	2.66858e+06	6.48223e+06	1	438302	8	1059	8	3
438106	3	514103	Auckland Central East	704	Hobson Ward	7	Auckland City	02	Auckland Region	2.66813e+06	6.48239e+06	1	438106	8	1031	1	3
568300	129	518701	Hillsborough West	702	Avondale-Roskill Ward	7	Auckland City	02	Auckland Region	2.66697e+06	6.47536e+06	1	568300	6	985	45	2
962601	177	527503	Cambridge Central	1702	Cambridge Ward	17	Waipa District	03	Waikato Region	2.72722e+06	6.36546e+06	1	962601	7	1025	62	2
963100	66	527503	Cambridge Central	1702	Cambridge Ward	17	Waipa District	03	Waikato Region	2.72793e+06	6.36494e+06	1	963100	9	1099	30	3
438303	78	514103	Auckland Central East	704	Hobson Ward	7	Auckland City	02	Auckland Region	2.66852e+06	6.48223e+06	1	438303	8	1059	35	3
438402	183	514103	Auckland Central East	704	Hobson Ward	7	Auckland City	02	Auckland Region	2.6684e+06	6.48233e+06	1	438402	9	1082	82	3
437900	159	514101	Auckland Harbourside	704	Hobson Ward	7	Auckland City	02	Auckland Region	2.66804e+06	6.48264e+06	1	437900	8	1064	72	3
438215	36	514101	Auckland Harbourside	704	Hobson Ward	7	Auckland City	02	Auckland Region	2.66871e+06	6.48226e+06	1	438215	5	956	13	2
438207	384	514101	Auckland Harbourside	704	Hobson Ward	7	Auckland City	02	Auckland Region	2.66926e+06	6.4821e+06	1	438207	5	956	134	2
3189900	63	612802	Riverton West	7305	Riverton Ward	73	Southland District	15	Southland Region	2.12582e+06	5.41596e+06	1	3189900	4	937	22	2
568500	165	518701	Hillsborough West	702	Avondale-Roskill Ward	7	Auckland City	02	Auckland Region	2.66695e+06	6.47512e+06	1	568500	3	920	54	1
2141800	93	573400	Mt Victoria West	4703	Lambton Ward	47	Wellington City	09	Wellington Region	2.65974e+06	5.98835e+06	1	2141800	3	930	31	1
2141700	123	573400	Mt Victoria West	4703	Lambton Ward	47	Wellington City	09	Wellington Region	2.65961e+06	5.98832e+06	1	2141700	5	957	43	2
438000	108	514103	Auckland Central East	704	Hobson Ward	7	Auckland City	02	Auckland Region	2.66798e+06	6.48251e+06	1	438000	8	1060	49	3
438206	156	514101	Auckland Harbourside	704	Hobson Ward	7	Auckland City	02	Auckland Region	2.66886e+06	6.48205e+06	1	438206	4	953	55	2
962900	33	527503	Cambridge Central	1702	Cambridge Ward	17	Waipa District	03	Waikato Region	2.72753e+06	6.36488e+06	1	962900	9	1099	15	3
962700	3	527503	Cambridge Central	1702	Cambridge Ward	17	Waipa District	03	Waikato Region	2.72732e+06	6.36485e+06	1	962700	9	1099	1	3
438204	3	514101	Auckland Harbourside	704	Hobson Ward	7	Auckland City	02	Auckland Region	2.6695e+06	6.48227e+06	1	438204	5	956	1	2
2141100	81	573400	Mt Victoria West	4703	Lambton Ward	47	Wellington City	09	Wellington Region	2.65937e+06	5.98853e+06	1	2141100	8	1032	36	3
438102	3	514103	Auckland Central East	704	Hobson Ward	7	Auckland City	02	Auckland Region	2.66795e+06	6.48243e+06	1	438102	8	1060	1	3
962800	3	527503	Cambridge Central	1702	Cambridge Ward	17	Waipa District	03	Waikato Region	2.72737e+06	6.36469e+06	1	962800	9	1099	1	3
963000	30	527503	Cambridge Central	1702	Cambridge Ward	17	Waipa District	03	Waikato Region	2.72751e+06	6.36467e+06	1	963000	9	1099	14	3
437800	144	514103	Auckland Central East	704	Hobson Ward	7	Auckland City	02	Auckland Region	2.66821e+06	6.48229e+06	1	437800	8	1061	65	3
568600	96	518701	Hillsborough West	702	Avondale-Roskill Ward	7	Auckland City	02	Auckland Region	2.66714e+06	6.47507e+06	1	568600	5	966	34	2
3190300	60	612801	Riverton East	7305	Riverton Ward	73	Southland District	15	Southland Region	2.1268e+06	5.41797e+06	1	3190300	8	1035	27	3
438218	3	514101	Auckland Harbourside	704	Hobson Ward	7	Auckland City	02	Auckland Region	2.66769e+06	6.48287e+06	1	438218	6	982	1	2
568400	192	518701	Hillsborough West	702	Avondale-Roskill Ward	7	Auckland City	02	Auckland Region	2.66707e+06	6.47528e+06	1	568400	7	1009	67	2
2142000	96	573400	Mt Victoria West	4703	Lambton Ward	47	Wellington City	09	Wellington Region	2.65957e+06	5.98821e+06	1	2142000	3	930	32	1
2142500	87	573400	Mt Victoria West	4703	Lambton Ward	47	Wellington City	09	Wellington Region	2.65946e+06	5.98822e+06	1	2142500	1	899	29	1
438405	219	514103	Auckland Central East	704	Hobson Ward	7	Auckland City	02	Auckland Region	2.66835e+06	6.48232e+06	1	438405	9	1121	99	3
2141300	207	573400	Mt Victoria West	4703	Lambton Ward	47	Wellington City	09	Wellington Region	2.65941e+06	5.98843e+06	1	2141300	6	989	72	2
438406	318	514103	Auckland Central East	704	Hobson Ward	7	Auckland City	02	Auckland Region	2.66849e+06	6.48222e+06	1	438406	10	1166	143	3
2146000	138	573300	Mt Cook-Wallace Street	4703	Lambton Ward	47	Wellington City	09	Wellington Region	2.65885e+06	5.98786e+06	1	2146000	6	986	48	2
2145100	156	573300	Mt Cook-Wallace Street	4703	Lambton Ward	47	Wellington City	09	Wellington Region	2.65846e+06	5.98785e+06	1	2145100	5	955	55	2
2144600	156	573300	Mt Cook-Wallace Street	4703	Lambton Ward	47	Wellington City	09	Wellington Region	2.65854e+06	5.9881e+06	1	2144600	10	1284	70	3
2144700	45	573300	Mt Cook-Wallace Street	4703	Lambton Ward	47	Wellington City	09	Wellington Region	2.6583e+06	5.98813e+06	1	2144700	5	974	16	2
2539205	99	590300	Middleton	6006	Spreydon-Heathcote Ward	60	Christchurch City	13	Canterbury Region	2.47752e+06	5.73971e+06	1	2539205	7	1025	35	2
2144900	27	573300	Mt Cook-Wallace Street	4703	Lambton Ward	47	Wellington City	09	Wellington Region	2.65832e+06	5.98799e+06	1	2144900	5	974	9	2
2539206	99	590300	Middleton	6006	Spreydon-Heathcote Ward	60	Christchurch City	13	Canterbury Region	2.47745e+06	5.73966e+06	1	2539206	7	1025	35	2
441800	6	514301	Grafton West	704	Hobson Ward	7	Auckland City	02	Auckland Region	2.66747e+06	6.48032e+06	1	441800	7	1004	2	2
2538700	81	590300	Middleton	6006	Spreydon-Heathcote Ward	60	Christchurch City	13	Canterbury Region	2.47744e+06	5.73952e+06	1	2538700	6	998	28	2
2143300	24	573400	Mt Victoria West	4703	Lambton Ward	47	Wellington City	09	Wellington Region	2.65918e+06	5.98799e+06	1	2143300	2	906	8	1
2143100	84	573400	Mt Victoria West	4703	Lambton Ward	47	Wellington City	09	Wellington Region	2.65944e+06	5.98797e+06	1	2143100	8	1064	38	3
2144300	114	573300	Mt Cook-Wallace Street	4703	Lambton Ward	47	Wellington City	09	Wellington Region	2.65851e+06	5.98829e+06	1	2144300	9	1114	51	3
2144000	102	573400	Mt Victoria West	4703	Lambton Ward	47	Wellington City	09	Wellington Region	2.6595e+06	5.98828e+06	1	2144000	5	964	36	2
2799600	69	599700	Parkside	6404	Timaru Ward	64	Timaru District	13	Canterbury Region	2.37072e+06	5.64347e+06	1	2799600	8	1071	31	3
2799700	39	599700	Parkside	6404	Timaru Ward	64	Timaru District	13	Canterbury Region	2.37093e+06	5.64347e+06	1	2799700	8	1071	18	3
2144200	108	573300	Mt Cook-Wallace Street	4703	Lambton Ward	47	Wellington City	09	Wellington Region	2.65837e+06	5.98824e+06	1	2144200	8	1061	49	3
2143500	54	573400	Mt Victoria West	4703	Lambton Ward	47	Wellington City	09	Wellington Region	2.65918e+06	5.98822e+06	1	2143500	5	968	19	2
2144500	390	573300	Mt Cook-Wallace Street	4703	Lambton Ward	47	Wellington City	09	Wellington Region	2.6586e+06	5.98827e+06	1	2144500	10	1206	176	3
2143200	72	573400	Mt Victoria West	4703	Lambton Ward	47	Wellington City	09	Wellington Region	2.65955e+06	5.98792e+06	1	2143200	2	906	24	1
2143800	69	573400	Mt Victoria West	4703	Lambton Ward	47	Wellington City	09	Wellington Region	2.65933e+06	5.9882e+06	1	2143800	5	964	24	2
2144400	258	573300	Mt Cook-Wallace Street	4703	Lambton Ward	47	Wellington City	09	Wellington Region	2.65844e+06	5.98817e+06	1	2144400	10	1346	116	3
2143600	75	573400	Mt Victoria West	4703	Lambton Ward	47	Wellington City	09	Wellington Region	2.65926e+06	5.98813e+06	1	2143600	5	968	26	2
2142800	117	573400	Mt Victoria West	4703	Lambton Ward	47	Wellington City	09	Wellington Region	2.65938e+06	5.98808e+06	1	2142800	8	1041	53	3
2143400	12	573400	Mt Victoria West	4703	Lambton Ward	47	Wellington City	09	Wellington Region	2.65923e+06	5.98835e+06	1	2143400	5	968	4	2
2144100	411	573300	Mt Cook-Wallace Street	4703	Lambton Ward	47	Wellington City	09	Wellington Region	2.65841e+06	5.98838e+06	1	2144100	9	1077	185	3
963900	171	527502	Cambridge West	1702	Cambridge Ward	17	Waipa District	03	Waikato Region	2.7269e+06	6.36531e+06	1	963900	5	973	60	2
2143000	90	573400	Mt Victoria West	4703	Lambton Ward	47	Wellington City	09	Wellington Region	2.65934e+06	5.98802e+06	1	2143000	8	1064	40	3
2143900	129	573400	Mt Victoria West	4703	Lambton Ward	47	Wellington City	09	Wellington Region	2.65937e+06	5.98832e+06	1	2143900	7	1006	45	2
964100	198	527502	Cambridge West	1702	Cambridge Ward	17	Waipa District	03	Waikato Region	2.72636e+06	6.36507e+06	1	964100	4	949	69	2
964300	165	527502	Cambridge West	1702	Cambridge Ward	17	Waipa District	03	Waikato Region	2.72684e+06	6.36507e+06	1	964300	8	1070	74	3
964200	108	527502	Cambridge West	1702	Cambridge Ward	17	Waipa District	03	Waikato Region	2.72659e+06	6.36506e+06	1	964200	4	939	38	2
964800	72	527502	Cambridge West	1702	Cambridge Ward	17	Waipa District	03	Waikato Region	2.727e+06	6.36472e+06	1	964800	6	985	25	2
2799400	21	599700	Parkside	6404	Timaru Ward	64	Timaru District	13	Canterbury Region	2.37069e+06	5.64358e+06	1	2799400	6	983	7	2
964500	72	527502	Cambridge West	1702	Cambridge Ward	17	Waipa District	03	Waikato Region	2.72638e+06	6.36485e+06	1	964500	5	955	25	2
964600	117	527502	Cambridge West	1702	Cambridge Ward	17	Waipa District	03	Waikato Region	2.72661e+06	6.36481e+06	1	964600	5	955	41	2
964700	132	527502	Cambridge West	1702	Cambridge Ward	17	Waipa District	03	Waikato Region	2.72685e+06	6.36472e+06	1	964700	7	1013	46	2
2143700	69	573400	Mt Victoria West	4703	Lambton Ward	47	Wellington City	09	Wellington Region	2.65928e+06	5.98821e+06	1	2143700	5	968	24	2
963200	201	527502	Cambridge West	1702	Cambridge Ward	17	Waipa District	03	Waikato Region	2.72632e+06	6.36593e+06	1	963200	3	928	66	1
963400	243	527502	Cambridge West	1702	Cambridge Ward	17	Waipa District	03	Waikato Region	2.7268e+06	6.36592e+06	1	963400	4	939	85	2
963300	237	527502	Cambridge West	1702	Cambridge Ward	17	Waipa District	03	Waikato Region	2.72656e+06	6.36592e+06	1	963300	4	952	83	2
2147200	147	573300	Mt Cook-Wallace Street	4703	Lambton Ward	47	Wellington City	09	Wellington Region	2.65867e+06	5.9875e+06	1	2147200	7	1004	51	2
2146500	138	573300	Mt Cook-Wallace Street	4703	Lambton Ward	47	Wellington City	09	Wellington Region	2.65854e+06	5.98779e+06	1	2146500	10	1220	62	3
968302	78	531003	Te Awamutu East	1704	Te Awamutu Ward	17	Waipa District	03	Waikato Region	2.71451e+06	6.35251e+06	1	968302	6	981	27	2
2539700	120	590200	Wharenui	6004	Riccarton-Wigram Ward	60	Christchurch City	13	Canterbury Region	2.47589e+06	5.74088e+06	1	2539700	8	1050	54	3
2540200	87	590200	Wharenui	6004	Riccarton-Wigram Ward	60	Christchurch City	13	Canterbury Region	2.47569e+06	5.74106e+06	1	2540200	7	1015	30	2
2146200	99	573300	Mt Cook-Wallace Street	4703	Lambton Ward	47	Wellington City	09	Wellington Region	2.65881e+06	5.98766e+06	1	2146200	7	1008	35	2
2145000	228	573300	Mt Cook-Wallace Street	4703	Lambton Ward	47	Wellington City	09	Wellington Region	2.65842e+06	5.98796e+06	1	2145000	7	1007	80	2
2145300	153	573300	Mt Cook-Wallace Street	4703	Lambton Ward	47	Wellington City	09	Wellington Region	2.65861e+06	5.98811e+06	1	2145300	7	1012	54	2
441501	84	514301	Grafton West	704	Hobson Ward	7	Auckland City	02	Auckland Region	2.66748e+06	6.48065e+06	1	441501	8	1066	38	3
2801000	84	599700	Parkside	6404	Timaru Ward	64	Timaru District	13	Canterbury Region	2.37102e+06	5.64328e+06	1	2801000	10	1149	38	3
2801100	27	599700	Parkside	6404	Timaru Ward	64	Timaru District	13	Canterbury Region	2.37116e+06	5.64323e+06	1	2801100	10	1149	12	3
2145400	21	573300	Mt Cook-Wallace Street	4703	Lambton Ward	47	Wellington City	09	Wellington Region	2.6588e+06	5.98806e+06	1	2145400	7	1012	7	2
965501	186	527505	Leamington East	1702	Cambridge Ward	17	Waipa District	03	Waikato Region	2.72845e+06	6.36424e+06	1	965501	2	916	61	1
965000	30	527503	Cambridge Central	1702	Cambridge Ward	17	Waipa District	03	Waikato Region	2.72709e+06	6.36453e+06	1	965000	5	969	10	2
965800	51	527504	Leamington West	1702	Cambridge Ward	17	Waipa District	03	Waikato Region	2.72801e+06	6.36395e+06	1	965800	4	942	18	2
965100	15	527503	Cambridge Central	1702	Cambridge Ward	17	Waipa District	03	Waikato Region	2.72741e+06	6.36447e+06	1	965100	5	969	5	2
965200	27	527503	Cambridge Central	1702	Cambridge Ward	17	Waipa District	03	Waikato Region	2.72758e+06	6.36451e+06	1	965200	5	969	9	2
965400	159	527503	Cambridge Central	1702	Cambridge Ward	17	Waipa District	03	Waikato Region	2.72781e+06	6.36437e+06	1	965400	5	969	56	2
2539102	123	590300	Middleton	6006	Spreydon-Heathcote Ward	60	Christchurch City	13	Canterbury Region	2.47764e+06	5.73976e+06	1	2539102	9	1121	55	3
2145600	318	573300	Mt Cook-Wallace Street	4703	Lambton Ward	47	Wellington City	09	Wellington Region	2.65896e+06	5.98812e+06	1	2145600	10	1249	143	3
2145500	93	573300	Mt Cook-Wallace Street	4703	Lambton Ward	47	Wellington City	09	Wellington Region	2.65894e+06	5.98822e+06	1	2145500	7	1012	33	2
966000	219	527504	Leamington West	1702	Cambridge Ward	17	Waipa District	03	Waikato Region	2.72766e+06	6.36377e+06	1	966000	5	954	77	2
965502	207	527505	Leamington East	1702	Cambridge Ward	17	Waipa District	03	Waikato Region	2.7282e+06	6.36393e+06	1	965502	2	912	68	1
965300	6	527503	Cambridge Central	1702	Cambridge Ward	17	Waipa District	03	Waikato Region	2.72763e+06	6.36424e+06	1	965300	5	969	2	2
441900	18	514301	Grafton West	704	Hobson Ward	7	Auckland City	02	Auckland Region	2.66755e+06	6.48023e+06	1	441900	7	1004	6	2
2146100	126	573300	Mt Cook-Wallace Street	4703	Lambton Ward	47	Wellington City	09	Wellington Region	2.65891e+06	5.9878e+06	1	2146100	7	1008	44	2
2145900	24	573300	Mt Cook-Wallace Street	4703	Lambton Ward	47	Wellington City	09	Wellington Region	2.65877e+06	5.98789e+06	1	2145900	7	1004	8	2
2145200	99	573300	Mt Cook-Wallace Street	4703	Lambton Ward	47	Wellington City	09	Wellington Region	2.6583e+06	5.98775e+06	1	2145200	6	975	35	2
2144800	270	573300	Mt Cook-Wallace Street	4703	Lambton Ward	47	Wellington City	09	Wellington Region	2.65838e+06	5.98808e+06	1	2144800	10	1246	122	3
441505	162	514301	Grafton West	704	Hobson Ward	7	Auckland City	02	Auckland Region	2.66744e+06	6.48051e+06	1	441505	8	1039	73	3
441600	3	514301	Grafton West	704	Hobson Ward	7	Auckland City	02	Auckland Region	2.66768e+06	6.48042e+06	1	441600	7	1004	1	2
2538602	66	590300	Middleton	6006	Spreydon-Heathcote Ward	60	Christchurch City	13	Canterbury Region	2.47715e+06	5.7395e+06	1	2538602	10	1318	30	3
2539002	171	590300	Middleton	6006	Spreydon-Heathcote Ward	60	Christchurch City	13	Canterbury Region	2.47776e+06	5.73986e+06	1	2539002	6	998	60	2
2145700	48	573300	Mt Cook-Wallace Street	4703	Lambton Ward	47	Wellington City	09	Wellington Region	2.65891e+06	5.98797e+06	1	2145700	7	1004	17	2
441503	162	514301	Grafton West	704	Hobson Ward	7	Auckland City	02	Auckland Region	2.66759e+06	6.48055e+06	1	441503	6	979	57	2
441506	210	514301	Grafton West	704	Hobson Ward	7	Auckland City	02	Auckland Region	2.66758e+06	6.48046e+06	1	441506	7	1010	74	2
441400	9	514301	Grafton West	704	Hobson Ward	7	Auckland City	02	Auckland Region	2.66752e+06	6.48073e+06	1	441400	6	999	3	2
2539103	108	590300	Middleton	6006	Spreydon-Heathcote Ward	60	Christchurch City	13	Canterbury Region	2.47752e+06	5.73978e+06	1	2539103	4	952	38	2
2800900	75	599700	Parkside	6404	Timaru Ward	64	Timaru District	13	Canterbury Region	2.37085e+06	5.64328e+06	1	2800900	6	983	26	2
2801400	93	599700	Parkside	6404	Timaru Ward	64	Timaru District	13	Canterbury Region	2.37103e+06	5.64306e+06	1	2801400	7	1007	33	2
441502	138	514301	Grafton West	704	Hobson Ward	7	Auckland City	02	Auckland Region	2.66746e+06	6.48057e+06	1	441502	8	1066	62	3
2145800	48	573300	Mt Cook-Wallace Street	4703	Lambton Ward	47	Wellington City	09	Wellington Region	2.65878e+06	5.98793e+06	1	2145800	5	974	17	2
2148601	57	576500	Adelaide	4703	Lambton Ward	47	Wellington City	09	Wellington Region	2.65894e+06	5.98749e+06	1	2148601	7	1009	20	2
2148400	225	576500	Adelaide	4703	Lambton Ward	47	Wellington City	09	Wellington Region	2.65884e+06	5.98751e+06	1	2148400	9	1114	101	3
969400	69	531002	Te Awamutu Central	1704	Te Awamutu Ward	17	Waipa District	03	Waikato Region	2.71328e+06	6.35269e+06	1	969400	6	998	24	2
970000	153	531002	Te Awamutu Central	1704	Te Awamutu Ward	17	Waipa District	03	Waikato Region	2.71389e+06	6.35265e+06	1	970000	7	1014	54	2
1494300	78	548200	Hastings Central	3005	Hastings Ward	30	Hastings District	06	Hawke's Bay Region	2.8406e+06	6.16707e+06	1	1494300	9	1108	35	3
2146700	66	573300	Mt Cook-Wallace Street	4703	Lambton Ward	47	Wellington City	09	Wellington Region	2.65858e+06	5.98768e+06	1	2146700	10	1206	30	3
969600	129	531002	Te Awamutu Central	1704	Te Awamutu Ward	17	Waipa District	03	Waikato Region	2.71345e+06	6.35246e+06	1	969600	6	984	45	2
443700	132	515700	Epsom North	704	Hobson Ward	7	Auckland City	02	Auckland Region	2.66837e+06	6.47935e+06	1	443700	3	919	44	1
2540300	141	590200	Wharenui	6004	Riccarton-Wigram Ward	60	Christchurch City	13	Canterbury Region	2.47599e+06	5.74108e+06	1	2540300	4	946	49	2
2147600	81	573300	Mt Cook-Wallace Street	4703	Lambton Ward	47	Wellington City	09	Wellington Region	2.65849e+06	5.98753e+06	1	2147600	7	1020	28	2
2147500	114	573300	Mt Cook-Wallace Street	4703	Lambton Ward	47	Wellington City	09	Wellington Region	2.65858e+06	5.98753e+06	1	2147500	6	980	40	2
2148000	87	576500	Adelaide	4703	Lambton Ward	47	Wellington City	09	Wellington Region	2.65906e+06	5.98794e+06	1	2148000	6	985	30	2
2147900	9	576500	Adelaide	4703	Lambton Ward	47	Wellington City	09	Wellington Region	2.65898e+06	5.98797e+06	1	2147900	6	985	3	2
443500	171	515700	Epsom North	704	Hobson Ward	7	Auckland City	02	Auckland Region	2.66861e+06	6.47917e+06	1	443500	8	1042	77	3
2539500	93	590200	Wharenui	6004	Riccarton-Wigram Ward	60	Christchurch City	13	Canterbury Region	2.47589e+06	5.74096e+06	1	2539500	8	1050	42	3
2147400	63	573300	Mt Cook-Wallace Street	4703	Lambton Ward	47	Wellington City	09	Wellington Region	2.65857e+06	5.98739e+06	1	2147400	6	984	22	2
2147300	81	573300	Mt Cook-Wallace Street	4703	Lambton Ward	47	Wellington City	09	Wellington Region	2.65867e+06	5.98739e+06	1	2147300	6	984	28	2
2146400	123	573300	Mt Cook-Wallace Street	4703	Lambton Ward	47	Wellington City	09	Wellington Region	2.65839e+06	5.98773e+06	1	2146400	5	962	43	2
2147100	144	573300	Mt Cook-Wallace Street	4703	Lambton Ward	47	Wellington City	09	Wellington Region	2.65867e+06	5.98764e+06	1	2147100	6	989	50	2
2147000	39	573300	Mt Cook-Wallace Street	4703	Lambton Ward	47	Wellington City	09	Wellington Region	2.65872e+06	5.98765e+06	1	2147000	6	989	14	2
2146600	60	573300	Mt Cook-Wallace Street	4703	Lambton Ward	47	Wellington City	09	Wellington Region	2.65851e+06	5.98769e+06	1	2146600	7	1004	21	2
443900	3	515700	Epsom North	704	Hobson Ward	7	Auckland City	02	Auckland Region	2.6682e+06	6.47934e+06	1	443900	4	935	1	2
443400	150	515700	Epsom North	704	Hobson Ward	7	Auckland City	02	Auckland Region	2.66865e+06	6.4793e+06	1	443400	6	981	52	2
2146300	348	573300	Mt Cook-Wallace Street	4703	Lambton Ward	47	Wellington City	09	Wellington Region	2.65875e+06	5.98748e+06	1	2146300	7	1008	122	2
971500	156	531002	Te Awamutu Central	1704	Te Awamutu Ward	17	Waipa District	03	Waikato Region	2.71355e+06	6.35222e+06	1	971500	6	988	55	2
1496200	114	548000	Mayfair	3005	Hastings Ward	30	Hastings District	06	Hawke's Bay Region	2.84118e+06	6.16792e+06	1	1496200	3	919	38	1
54100	24	501100	Paihia	102	Eastern Ward	1	Far North District	01	Northland Region	2.60922e+06	6.65729e+06	1	54100	4	946	8	2
54200	195	501100	Paihia	102	Eastern Ward	1	Far North District	01	Northland Region	2.60982e+06	6.657e+06	1	54200	6	985	68	2
54300	27	501100	Paihia	102	Eastern Ward	1	Far North District	01	Northland Region	2.61003e+06	6.65703e+06	1	54300	10	1335	12	3
54502	51	501100	Paihia	102	Eastern Ward	1	Far North District	01	Northland Region	2.61028e+06	6.65657e+06	1	54502	6	975	18	2
970300	75	531002	Te Awamutu Central	1704	Te Awamutu Ward	17	Waipa District	03	Waikato Region	2.71425e+06	6.35249e+06	1	970300	9	1089	34	3
2148300	15	576500	Adelaide	4703	Lambton Ward	47	Wellington City	09	Wellington Region	2.65896e+06	5.98759e+06	1	2148300	6	985	5	2
969300	78	531002	Te Awamutu Central	1704	Te Awamutu Ward	17	Waipa District	03	Waikato Region	2.71335e+06	6.35284e+06	1	969300	6	998	27	2
969201	39	531001	Te Awamutu West	1704	Te Awamutu Ward	17	Waipa District	03	Waikato Region	2.71278e+06	6.35295e+06	1	969201	7	1028	14	2
444200	72	515700	Epsom North	704	Hobson Ward	7	Auckland City	02	Auckland Region	2.66834e+06	6.47912e+06	1	444200	4	935	25	2
969202	45	531001	Te Awamutu West	1704	Te Awamutu Ward	17	Waipa District	03	Waikato Region	2.71275e+06	6.35275e+06	1	969202	7	1028	16	2
969900	90	531002	Te Awamutu Central	1704	Te Awamutu Ward	17	Waipa District	03	Waikato Region	2.71397e+06	6.35281e+06	1	969900	5	965	31	2
970100	69	531002	Te Awamutu Central	1704	Te Awamutu Ward	17	Waipa District	03	Waikato Region	2.71421e+06	6.3527e+06	1	970100	9	1089	31	3
969800	243	531003	Te Awamutu East	1704	Te Awamutu Ward	17	Waipa District	03	Waikato Region	2.71416e+06	6.35308e+06	1	969800	3	925	80	1
2148602	21	576500	Adelaide	4705	Southern Ward	47	Wellington City	09	Wellington Region	2.65892e+06	5.9874e+06	1	2148602	7	1009	7	2
2148500	12	576500	Adelaide	4703	Lambton Ward	47	Wellington City	09	Wellington Region	2.65882e+06	5.98739e+06	1	2148500	3	930	4	1
1494100	15	548200	Hastings Central	3005	Hastings Ward	30	Hastings District	06	Hawke's Bay Region	2.84033e+06	6.16686e+06	1	1494100	9	1108	7	3
2148700	42	576500	Adelaide	4705	Southern Ward	47	Wellington City	09	Wellington Region	2.65889e+06	5.98731e+06	1	2148700	7	1009	15	2
2149200	195	576500	Adelaide	4705	Southern Ward	47	Wellington City	09	Wellington Region	2.65916e+06	5.98698e+06	1	2149200	7	1010	68	2
969500	45	531002	Te Awamutu Central	1704	Te Awamutu Ward	17	Waipa District	03	Waikato Region	2.7136e+06	6.35277e+06	1	969500	6	984	16	2
969100	57	531001	Te Awamutu West	1704	Te Awamutu Ward	17	Waipa District	03	Waikato Region	2.71259e+06	6.35304e+06	1	969100	7	1028	20	2
2149100	21	576500	Adelaide	4705	Southern Ward	47	Wellington City	09	Wellington Region	2.65913e+06	5.98736e+06	1	2149100	7	1009	7	2
1497100	240	548000	Mayfair	3005	Hastings Ward	30	Hastings District	06	Hawke's Bay Region	2.84123e+06	6.1671e+06	1	1497100	6	997	84	2
710510	252	523101	Botany Downs	806	Howick Ward	8	Manukau City	02	Auckland Region	2.68126e+06	6.47485e+06	1	710510	2	900	83	1
711167	63	523106	Millhouse	807	Botany-Clevedon Ward	8	Manukau City	02	Auckland Region	2.68121e+06	6.47417e+06	1	711167	1	890	21	1
711141	87	523106	Millhouse	806	Howick Ward	8	Manukau City	02	Auckland Region	2.68108e+06	6.47452e+06	1	711141	4	939	30	2
711139	6	523105	Golfland	806	Howick Ward	8	Manukau City	02	Auckland Region	2.68086e+06	6.47423e+06	1	711139	2	903	2	1
710515	141	523101	Botany Downs	806	Howick Ward	8	Manukau City	02	Auckland Region	2.68054e+06	6.47462e+06	1	710515	1	895	47	1
1497500	96	548000	Mayfair	3005	Hastings Ward	30	Hastings District	06	Hawke's Bay Region	2.84102e+06	6.1671e+06	1	1497500	6	996	34	2
710601	267	523101	Botany Downs	806	Howick Ward	8	Manukau City	02	Auckland Region	2.68153e+06	6.47541e+06	1	710601	1	895	88	1
1496600	60	548000	Mayfair	3005	Hastings Ward	30	Hastings District	06	Hawke's Bay Region	2.84126e+06	6.16776e+06	1	1496600	5	964	21	2
710517	141	523101	Botany Downs	806	Howick Ward	8	Manukau City	02	Auckland Region	2.68085e+06	6.47455e+06	1	710517	3	934	47	1
711133	222	523106	Millhouse	807	Botany-Clevedon Ward	8	Manukau City	02	Auckland Region	2.68096e+06	6.47338e+06	1	711133	1	896	73	1
54600	57	501100	Paihia	102	Eastern Ward	1	Far North District	01	Northland Region	2.61046e+06	6.65658e+06	1	54600	4	942	20	2
54801	84	501100	Paihia	102	Eastern Ward	1	Far North District	01	Northland Region	2.61065e+06	6.65617e+06	1	54801	6	979	29	2
54700	87	501100	Paihia	102	Eastern Ward	1	Far North District	01	Northland Region	2.61037e+06	6.6564e+06	1	54700	4	942	30	2
54802	123	501100	Paihia	102	Eastern Ward	1	Far North District	01	Northland Region	2.61063e+06	6.65588e+06	1	54802	7	1002	43	2
1495600	198	548000	Mayfair	3005	Hastings Ward	30	Hastings District	06	Hawke's Bay Region	2.84103e+06	6.16748e+06	1	1495600	4	953	69	2
1496000	66	548000	Mayfair	3005	Hastings Ward	30	Hastings District	06	Hawke's Bay Region	2.84114e+06	6.16753e+06	1	1496000	4	951	23	2
971400	69	531002	Te Awamutu Central	1704	Te Awamutu Ward	17	Waipa District	03	Waikato Region	2.71371e+06	6.35234e+06	1	971400	7	1010	24	2
1494600	27	548200	Hastings Central	3005	Hastings Ward	30	Hastings District	06	Hawke's Bay Region	2.84056e+06	6.16682e+06	1	1494600	8	1046	12	3
1495300	60	548000	Mayfair	3005	Hastings Ward	30	Hastings District	06	Hawke's Bay Region	2.8406e+06	6.16736e+06	1	1495300	7	1004	21	2
1495700	117	548000	Mayfair	3005	Hastings Ward	30	Hastings District	06	Hawke's Bay Region	2.841e+06	6.16733e+06	1	1495700	8	1039	53	3
1495900	117	548000	Mayfair	3005	Hastings Ward	30	Hastings District	06	Hawke's Bay Region	2.84083e+06	6.16728e+06	1	1495900	3	932	39	1
970200	132	531002	Te Awamutu Central	1704	Te Awamutu Ward	17	Waipa District	03	Waikato Region	2.71411e+06	6.35257e+06	1	970200	9	1126	59	3
1496100	135	548000	Mayfair	3005	Hastings Ward	30	Hastings District	06	Hawke's Bay Region	2.84123e+06	6.16756e+06	1	1496100	6	995	47	2
971300	108	531002	Te Awamutu Central	1704	Te Awamutu Ward	17	Waipa District	03	Waikato Region	2.71385e+06	6.35247e+06	1	971300	7	1010	38	2
1494700	33	548200	Hastings Central	3005	Hastings Ward	30	Hastings District	06	Hawke's Bay Region	2.84067e+06	6.16689e+06	1	1494700	8	1046	15	3
53800	123	501100	Paihia	102	Eastern Ward	1	Far North District	01	Northland Region	2.6089e+06	6.65767e+06	1	53800	10	1335	55	3
53900	135	501100	Paihia	102	Eastern Ward	1	Far North District	01	Northland Region	2.60914e+06	6.65758e+06	1	53900	10	1154	61	3
54000	87	501100	Paihia	102	Eastern Ward	1	Far North District	01	Northland Region	2.60953e+06	6.65736e+06	1	54000	4	946	30	2
1494500	12	548200	Hastings Central	3005	Hastings Ward	30	Hastings District	06	Hawke's Bay Region	2.84042e+06	6.1667e+06	1	1494500	8	1046	5	3
710518	99	523101	Botany Downs	806	Howick Ward	8	Manukau City	02	Auckland Region	2.68091e+06	6.47461e+06	1	710518	1	895	33	1
711147	207	523105	Golfland	807	Botany-Clevedon Ward	8	Manukau City	02	Auckland Region	2.68056e+06	6.47342e+06	1	711147	3	928	68	1
450700	147	517400	Newmarket	704	Hobson Ward	7	Auckland City	02	Auckland Region	2.66911e+06	6.48034e+06	1	450700	8	1044	66	3
710516	105	523101	Botany Downs	806	Howick Ward	8	Manukau City	02	Auckland Region	2.68067e+06	6.47457e+06	1	710516	2	918	35	1
710503	267	523101	Botany Downs	806	Howick Ward	8	Manukau City	02	Auckland Region	2.68122e+06	6.47563e+06	1	710503	2	903	88	1
1497200	135	548000	Mayfair	3005	Hastings Ward	30	Hastings District	06	Hawke's Bay Region	2.84137e+06	6.16731e+06	1	1497200	7	1002	47	2
1496400	108	548000	Mayfair	3005	Hastings Ward	30	Hastings District	06	Hawke's Bay Region	2.84129e+06	6.16801e+06	1	1496400	5	964	38	2
710511	42	523101	Botany Downs	806	Howick Ward	8	Manukau City	02	Auckland Region	2.6809e+06	6.47497e+06	1	710511	3	928	14	1
710529	48	523101	Botany Downs	806	Howick Ward	8	Manukau City	02	Auckland Region	2.68145e+06	6.475e+06	1	710529	4	952	17	2
710522	228	523101	Botany Downs	806	Howick Ward	8	Manukau City	02	Auckland Region	2.68122e+06	6.47537e+06	1	710522	3	920	75	1
711163	105	523106	Millhouse	807	Botany-Clevedon Ward	8	Manukau City	02	Auckland Region	2.68093e+06	6.47423e+06	1	711163	2	910	35	1
1496500	141	548000	Mayfair	3005	Hastings Ward	30	Hastings District	06	Hawke's Bay Region	2.84139e+06	6.16777e+06	1	1496500	8	1054	63	3
710528	102	523101	Botany Downs	806	Howick Ward	8	Manukau City	02	Auckland Region	2.68145e+06	6.4749e+06	1	710528	4	952	36	2
711142	270	523106	Millhouse	806	Howick Ward	8	Manukau City	02	Auckland Region	2.68123e+06	6.47437e+06	1	711142	4	939	94	2
710512	255	523101	Botany Downs	806	Howick Ward	8	Manukau City	02	Auckland Region	2.68108e+06	6.47496e+06	1	710512	3	928	84	1
1497400	39	548000	Mayfair	3005	Hastings Ward	30	Hastings District	06	Hawke's Bay Region	2.84086e+06	6.16702e+06	1	1497400	8	1046	18	3
1496700	147	548000	Mayfair	3005	Hastings Ward	30	Hastings District	06	Hawke's Bay Region	2.84148e+06	6.16759e+06	1	1496700	6	983	51	2
710526	183	523101	Botany Downs	806	Howick Ward	8	Manukau City	02	Auckland Region	2.68072e+06	6.47484e+06	1	710526	3	922	60	1
710700	162	523101	Botany Downs	806	Howick Ward	8	Manukau City	02	Auckland Region	2.68143e+06	6.47519e+06	1	710700	2	901	53	1
711174	138	523106	Millhouse	807	Botany-Clevedon Ward	8	Manukau City	02	Auckland Region	2.6809e+06	6.47317e+06	1	711174	3	921	46	1
711166	72	523106	Millhouse	807	Botany-Clevedon Ward	8	Manukau City	02	Auckland Region	2.68113e+06	6.47416e+06	1	711166	2	910	24	1
711127	360	523106	Millhouse	807	Botany-Clevedon Ward	8	Manukau City	02	Auckland Region	2.68108e+06	6.4738e+06	1	711127	3	922	119	1
710521	228	523101	Botany Downs	806	Howick Ward	8	Manukau City	02	Auckland Region	2.68107e+06	6.47538e+06	1	710521	3	920	75	1
973400	6	531004	Te Awamutu South	1704	Te Awamutu Ward	17	Waipa District	03	Waikato Region	2.71463e+06	6.35222e+06	1	973400	9	1123	3	3
973000	3	531002	Te Awamutu Central	1704	Te Awamutu Ward	17	Waipa District	03	Waikato Region	2.71409e+06	6.35234e+06	1	973000	9	1123	1	3
711123	231	523105	Golfland	807	Botany-Clevedon Ward	8	Manukau City	02	Auckland Region	2.68054e+06	6.47379e+06	1	711123	2	907	76	1
711145	177	523105	Golfland	807	Botany-Clevedon Ward	8	Manukau City	02	Auckland Region	2.68052e+06	6.47367e+06	1	711145	1	884	58	1
380600	135	514402	Glenavon	702	Avondale-Roskill Ward	7	Auckland City	02	Auckland Region	2.66209e+06	6.47605e+06	1	380600	4	952	47	2
452300	21	515902	Parnell West	704	Hobson Ward	7	Auckland City	02	Auckland Region	2.6687e+06	6.48181e+06	1	452300	4	945	7	2
452400	69	515902	Parnell West	704	Hobson Ward	7	Auckland City	02	Auckland Region	2.66895e+06	6.48168e+06	1	452400	3	930	23	1
452000	258	515902	Parnell West	704	Hobson Ward	7	Auckland City	02	Auckland Region	2.66922e+06	6.48102e+06	1	452000	4	951	90	2
451800	174	515901	Parnell East	704	Hobson Ward	7	Auckland City	02	Auckland Region	2.66932e+06	6.48051e+06	1	451800	6	978	61	2
451000	123	517400	Newmarket	704	Hobson Ward	7	Auckland City	02	Auckland Region	2.66887e+06	6.48014e+06	1	451000	7	1002	43	2
451600	39	515902	Parnell West	704	Hobson Ward	7	Auckland City	02	Auckland Region	2.66927e+06	6.48072e+06	1	451600	7	1020	14	2
189500	129	508220	Windy Ridge	503	Harbour Ward	5	North Shore City	02	Auckland Region	2.66404e+06	6.48763e+06	1	189500	4	946	45	2
450901	15	517400	Newmarket	704	Hobson Ward	7	Auckland City	02	Auckland Region	2.66906e+06	6.48026e+06	1	450901	3	930	5	1
450902	108	517400	Newmarket	704	Hobson Ward	7	Auckland City	02	Auckland Region	2.66919e+06	6.48018e+06	1	450902	4	945	38	2
450100	69	517400	Newmarket	704	Hobson Ward	7	Auckland City	02	Auckland Region	2.66852e+06	6.48028e+06	1	450100	6	996	24	2
450400	216	517400	Newmarket	704	Hobson Ward	7	Auckland City	02	Auckland Region	2.66876e+06	6.48041e+06	1	450400	3	927	71	1
450500	84	517400	Newmarket	704	Hobson Ward	7	Auckland City	02	Auckland Region	2.66886e+06	6.48039e+06	1	450500	7	1005	29	2
450800	96	517400	Newmarket	704	Hobson Ward	7	Auckland City	02	Auckland Region	2.66918e+06	6.4804e+06	1	450800	3	930	32	1
453300	69	515902	Parnell West	704	Hobson Ward	7	Auckland City	02	Auckland Region	2.6692e+06	6.48178e+06	1	453300	2	913	23	1
454400	129	515902	Parnell West	704	Hobson Ward	7	Auckland City	02	Auckland Region	2.66931e+06	6.48123e+06	1	454400	2	903	43	1
1372000	15	544600	Gisborne Central	2807	Gisborne Ward	28	Gisborne District	05	Gisborne Region	2.94731e+06	6.26935e+06	1	1372000	9	1079	7	3
1370300	3	544600	Gisborne Central	2807	Gisborne Ward	28	Gisborne District	05	Gisborne Region	2.94659e+06	6.26935e+06	1	1370300	7	1003	1	2
1371500	9	544600	Gisborne Central	2807	Gisborne Ward	28	Gisborne District	05	Gisborne Region	2.94712e+06	6.26947e+06	1	1371500	9	1079	4	3
453102	231	515902	Parnell West	704	Hobson Ward	7	Auckland City	02	Auckland Region	2.66908e+06	6.4819e+06	1	453102	2	913	76	1
2158000	72	573200	Aro Street-Nairn Street	4703	Lambton Ward	47	Wellington City	09	Wellington Region	2.65825e+06	5.98866e+06	1	2158000	8	1058	32	3
453101	111	515902	Parnell West	704	Hobson Ward	7	Auckland City	02	Auckland Region	2.66906e+06	6.482e+06	1	453101	3	931	37	1
1764700	108	560730	Feilding Central	3903	Feilding Ward	39	Manawatu District	08	Manawatu-Wanganui Region	2.72893e+06	6.1058e+06	1	1764700	5	959	38	2
1765100	207	560720	Feilding West	3903	Feilding Ward	39	Manawatu District	08	Manawatu-Wanganui Region	2.72767e+06	6.10575e+06	1	1765100	5	964	72	2
453200	213	515902	Parnell West	704	Hobson Ward	7	Auckland City	02	Auckland Region	2.66943e+06	6.48191e+06	1	453200	3	927	70	1
584501	171	518901	Lynfield North	702	Avondale-Roskill Ward	7	Auckland City	02	Auckland Region	2.66335e+06	6.47501e+06	1	584501	6	982	60	2
1765201	81	560720	Feilding West	3903	Feilding Ward	39	Manawatu District	08	Manawatu-Wanganui Region	2.72765e+06	6.10557e+06	1	1765201	4	941	28	2
1765202	102	560720	Feilding West	3903	Feilding Ward	39	Manawatu District	08	Manawatu-Wanganui Region	2.72783e+06	6.10555e+06	1	1765202	4	941	36	2
1370600	9	544600	Gisborne Central	2807	Gisborne Ward	28	Gisborne District	05	Gisborne Region	2.94715e+06	6.26985e+06	1	1370600	9	1079	4	3
451500	57	515902	Parnell West	704	Hobson Ward	7	Auckland City	02	Auckland Region	2.66929e+06	6.48102e+06	1	451500	1	894	19	1
451900	9	515902	Parnell West	704	Hobson Ward	7	Auckland City	02	Auckland Region	2.66908e+06	6.48055e+06	1	451900	1	894	3	1
452200	141	515902	Parnell West	704	Hobson Ward	7	Auckland City	02	Auckland Region	2.66887e+06	6.48178e+06	1	452200	10	1268	63	3
452500	120	515902	Parnell West	704	Hobson Ward	7	Auckland City	02	Auckland Region	2.66895e+06	6.48162e+06	1	452500	4	944	42	2
2871600	123	603300	North East Valley	7103	Cargill Ward	71	Dunedin City	14	Otago Region	2.31787e+06	5.48113e+06	1	2871600	7	1027	43	2
189600	162	508220	Windy Ridge	503	Harbour Ward	5	North Shore City	02	Auckland Region	2.66415e+06	6.4875e+06	1	189600	4	936	57	2
452600	33	515902	Parnell West	704	Hobson Ward	7	Auckland City	02	Auckland Region	2.66907e+06	6.48149e+06	1	452600	4	945	12	2
452100	240	515902	Parnell West	704	Hobson Ward	7	Auckland City	02	Auckland Region	2.66929e+06	6.48081e+06	1	452100	7	1020	84	2
1763300	117	560740	Feilding East	3903	Feilding Ward	39	Manawatu District	08	Manawatu-Wanganui Region	2.72943e+06	6.10617e+06	1	1763300	7	1011	41	2
1763400	96	560740	Feilding East	3903	Feilding Ward	39	Manawatu District	08	Manawatu-Wanganui Region	2.72958e+06	6.10631e+06	1	1763400	7	1011	34	2
452700	78	515902	Parnell West	704	Hobson Ward	7	Auckland City	02	Auckland Region	2.669e+06	6.48148e+06	1	452700	4	945	27	2
451700	72	515902	Parnell West	704	Hobson Ward	7	Auckland City	02	Auckland Region	2.66918e+06	6.48064e+06	1	451700	1	894	24	1
451300	9	517400	Newmarket	704	Hobson Ward	7	Auckland City	02	Auckland Region	2.66881e+06	6.47979e+06	1	451300	7	1002	3	2
1372200	165	544600	Gisborne Central	2807	Gisborne Ward	28	Gisborne District	05	Gisborne Region	2.94714e+06	6.27027e+06	1	1372200	10	1195	74	3
2159900	90	573200	Aro Street-Nairn Street	4703	Lambton Ward	47	Wellington City	09	Wellington Region	2.6582e+06	5.98815e+06	1	2159900	8	1031	40	3
1765500	27	560720	Feilding West	3903	Feilding Ward	39	Manawatu District	08	Manawatu-Wanganui Region	2.72825e+06	6.1059e+06	1	1765500	10	1243	12	3
1765300	105	560720	Feilding West	3903	Feilding Ward	39	Manawatu District	08	Manawatu-Wanganui Region	2.72797e+06	6.10586e+06	1	1765300	8	1045	47	3
1372300	3	544600	Gisborne Central	2807	Gisborne Ward	28	Gisborne District	05	Gisborne Region	2.9472e+06	6.27009e+06	1	1372300	10	1195	1	3
1765700	6	560720	Feilding West	3903	Feilding Ward	39	Manawatu District	08	Manawatu-Wanganui Region	2.72809e+06	6.10568e+06	1	1765700	8	1045	3	3
454800	156	515902	Parnell West	704	Hobson Ward	7	Auckland City	02	Auckland Region	2.6696e+06	6.48193e+06	1	454800	5	959	55	2
1373300	102	544600	Gisborne Central	2807	Gisborne Ward	28	Gisborne District	05	Gisborne Region	2.9467e+06	6.27076e+06	1	1373300	9	1136	46	3
2159400	54	573200	Aro Street-Nairn Street	4703	Lambton Ward	47	Wellington City	09	Wellington Region	2.65814e+06	5.98855e+06	1	2159400	5	974	19	2
455100	156	515902	Parnell West	704	Hobson Ward	7	Auckland City	02	Auckland Region	2.67001e+06	6.48184e+06	1	455100	2	915	51	1
584701	75	518901	Lynfield North	702	Avondale-Roskill Ward	7	Auckland City	02	Auckland Region	2.66337e+06	6.47477e+06	1	584701	4	944	26	2
1370800	3	544600	Gisborne Central	2807	Gisborne Ward	28	Gisborne District	05	Gisborne Region	2.94692e+06	6.26964e+06	1	1370800	9	1079	1	3
1371100	6	544600	Gisborne Central	2807	Gisborne Ward	28	Gisborne District	05	Gisborne Region	2.94716e+06	6.26969e+06	1	1371100	9	1079	3	3
1371300	6	544600	Gisborne Central	2807	Gisborne Ward	28	Gisborne District	05	Gisborne Region	2.94731e+06	6.26968e+06	1	1371300	9	1079	3	3
1371700	3	544600	Gisborne Central	2807	Gisborne Ward	28	Gisborne District	05	Gisborne Region	2.94739e+06	6.26958e+06	1	1371700	9	1079	1	3
454300	174	515902	Parnell West	704	Hobson Ward	7	Auckland City	02	Auckland Region	2.66928e+06	6.48149e+06	1	454300	3	927	57	1
453700	135	515902	Parnell West	704	Hobson Ward	7	Auckland City	02	Auckland Region	2.66924e+06	6.48166e+06	1	453700	6	977	47	2
1764800	90	560730	Feilding Central	3903	Feilding Ward	39	Manawatu District	08	Manawatu-Wanganui Region	2.72879e+06	6.10593e+06	1	1764800	7	1013	31	2
1764900	78	560730	Feilding Central	3903	Feilding Ward	39	Manawatu District	08	Manawatu-Wanganui Region	2.72878e+06	6.10572e+06	1	1764900	7	1013	27	2
1370500	33	544600	Gisborne Central	2807	Gisborne Ward	28	Gisborne District	05	Gisborne Region	2.9473e+06	6.26996e+06	1	1370500	9	1079	15	3
453800	54	515902	Parnell West	704	Hobson Ward	7	Auckland City	02	Auckland Region	2.66916e+06	6.48144e+06	1	453800	6	977	19	2
453400	57	515902	Parnell West	704	Hobson Ward	7	Auckland City	02	Auckland Region	2.66909e+06	6.48178e+06	1	453400	3	924	19	1
1371000	6	544600	Gisborne Central	2807	Gisborne Ward	28	Gisborne District	05	Gisborne Region	2.94723e+06	6.26975e+06	1	1371000	9	1079	3	3
453500	9	515902	Parnell West	704	Hobson Ward	7	Auckland City	02	Auckland Region	2.66904e+06	6.48175e+06	1	453500	3	924	3	1
584900	168	518901	Lynfield North	702	Avondale-Roskill Ward	7	Auckland City	02	Auckland Region	2.6637e+06	6.47471e+06	1	584900	4	940	59	2
452900	129	515902	Parnell West	704	Hobson Ward	7	Auckland City	02	Auckland Region	2.66911e+06	6.48122e+06	1	452900	4	939	45	2
453600	111	515902	Parnell West	704	Hobson Ward	7	Auckland City	02	Auckland Region	2.66914e+06	6.48164e+06	1	453600	3	924	37	1
452800	42	515902	Parnell West	704	Hobson Ward	7	Auckland City	02	Auckland Region	2.66914e+06	6.48131e+06	1	452800	4	939	15	2
453103	111	515902	Parnell West	704	Hobson Ward	7	Auckland City	02	Auckland Region	2.66924e+06	6.48191e+06	1	453103	2	912	37	1
1371400	30	544600	Gisborne Central	2807	Gisborne Ward	28	Gisborne District	05	Gisborne Region	2.94723e+06	6.26958e+06	1	1371400	9	1079	14	3
584702	42	518901	Lynfield North	702	Avondale-Roskill Ward	7	Auckland City	02	Auckland Region	2.66354e+06	6.4749e+06	1	584702	4	944	15	2
453000	156	515902	Parnell West	704	Hobson Ward	7	Auckland City	02	Auckland Region	2.66896e+06	6.48196e+06	1	453000	2	913	51	1
2157900	171	573200	Aro Street-Nairn Street	4703	Lambton Ward	47	Wellington City	09	Wellington Region	2.6582e+06	5.98863e+06	1	2157900	6	995	60	2
2157800	51	573200	Aro Street-Nairn Street	4703	Lambton Ward	47	Wellington City	09	Wellington Region	2.65813e+06	5.98869e+06	1	2157800	8	1058	23	3
585000	216	518901	Lynfield North	702	Avondale-Roskill Ward	7	Auckland City	02	Auckland Region	2.66357e+06	6.4746e+06	1	585000	6	989	76	2
458000	111	515700	Epsom North	704	Hobson Ward	7	Auckland City	02	Auckland Region	2.66844e+06	6.47853e+06	1	458000	8	1068	50	3
1373400	117	544600	Gisborne Central	2807	Gisborne Ward	28	Gisborne District	05	Gisborne Region	2.9468e+06	6.27056e+06	1	1373400	6	994	41	2
586800	228	518902	Lynfield South	702	Avondale-Roskill Ward	7	Auckland City	02	Auckland Region	2.66309e+06	6.47391e+06	1	586800	6	995	80	2
2158900	87	573200	Aro Street-Nairn Street	4703	Lambton Ward	47	Wellington City	09	Wellington Region	2.65799e+06	5.98849e+06	1	2158900	7	1013	30	2
2159100	81	573200	Aro Street-Nairn Street	4703	Lambton Ward	47	Wellington City	09	Wellington Region	2.65806e+06	5.98849e+06	1	2159100	7	1013	28	2
2159600	393	573200	Aro Street-Nairn Street	4703	Lambton Ward	47	Wellington City	09	Wellington Region	2.65828e+06	5.98837e+06	1	2159600	8	1037	177	3
586700	225	518902	Lynfield South	702	Avondale-Roskill Ward	7	Auckland City	02	Auckland Region	2.66341e+06	6.47409e+06	1	586700	3	935	74	1
585800	105	518901	Lynfield North	702	Avondale-Roskill Ward	7	Auckland City	02	Auckland Region	2.66367e+06	6.47418e+06	1	585800	5	973	37	2
1372100	39	544600	Gisborne Central	2807	Gisborne Ward	28	Gisborne District	05	Gisborne Region	2.94718e+06	6.26917e+06	1	1372100	9	1079	18	3
586500	249	518901	Lynfield North	702	Avondale-Roskill Ward	7	Auckland City	02	Auckland Region	2.66343e+06	6.47458e+06	1	586500	5	957	87	2
2158800	135	573200	Aro Street-Nairn Street	4703	Lambton Ward	47	Wellington City	09	Wellington Region	2.65795e+06	5.98861e+06	1	2158800	7	1004	47	2
1765600	9	560720	Feilding West	3903	Feilding Ward	39	Manawatu District	08	Manawatu-Wanganui Region	2.72825e+06	6.10578e+06	1	1765600	7	1006	3	2
586400	162	518901	Lynfield North	702	Avondale-Roskill Ward	7	Auckland City	02	Auckland Region	2.66331e+06	6.47436e+06	1	586400	6	986	57	2
2159000	87	573200	Aro Street-Nairn Street	4703	Lambton Ward	47	Wellington City	09	Wellington Region	2.65807e+06	5.9886e+06	1	2159000	7	1013	30	2
1765800	3	560720	Feilding West	3903	Feilding Ward	39	Manawatu District	08	Manawatu-Wanganui Region	2.72817e+06	6.10556e+06	1	1765800	8	1045	1	3
1766100	75	560720	Feilding West	3903	Feilding Ward	39	Manawatu District	08	Manawatu-Wanganui Region	2.72803e+06	6.10539e+06	1	1766100	10	1243	34	3
586600	180	518901	Lynfield North	702	Avondale-Roskill Ward	7	Auckland City	02	Auckland Region	2.6631e+06	6.47428e+06	1	586600	4	946	63	2
2159200	231	573200	Aro Street-Nairn Street	4703	Lambton Ward	47	Wellington City	09	Wellington Region	2.65816e+06	5.98848e+06	1	2159200	9	1123	104	3
1373500	108	544600	Gisborne Central	2807	Gisborne Ward	28	Gisborne District	05	Gisborne Region	2.94706e+06	6.27049e+06	1	1373500	9	1088	49	3
2159700	81	573200	Aro Street-Nairn Street	4703	Lambton Ward	47	Wellington City	09	Wellington Region	2.65825e+06	5.9882e+06	1	2159700	5	974	28	2
586901	117	518902	Lynfield South	702	Avondale-Roskill Ward	7	Auckland City	02	Auckland Region	2.66302e+06	6.47392e+06	1	586901	7	1016	41	2
491000	84	516001	Mt Hobson	704	Hobson Ward	7	Auckland City	02	Auckland Region	2.66924e+06	6.47915e+06	1	491000	6	989	29	2
587000	105	518901	Lynfield North	702	Avondale-Roskill Ward	7	Auckland City	02	Auckland Region	2.66358e+06	6.47424e+06	1	587000	5	972	37	2
2163800	33	576300	Newtown West	4705	Southern Ward	47	Wellington City	09	Wellington Region	2.65872e+06	5.987e+06	1	2163800	6	976	12	2
458100	129	515700	Epsom North	704	Hobson Ward	7	Auckland City	02	Auckland Region	2.6686e+06	6.47849e+06	1	458100	5	971	45	2
1373800	144	544600	Gisborne Central	2807	Gisborne Ward	28	Gisborne District	05	Gisborne Region	2.94693e+06	6.27038e+06	1	1373800	10	1269	65	3
457700	105	515700	Epsom North	704	Hobson Ward	7	Auckland City	02	Auckland Region	2.66858e+06	6.4789e+06	1	457700	7	1011	37	2
457800	219	515700	Epsom North	704	Hobson Ward	7	Auckland City	02	Auckland Region	2.66858e+06	6.47876e+06	1	457800	7	999	77	2
457600	96	515700	Epsom North	704	Hobson Ward	7	Auckland City	02	Auckland Region	2.66833e+06	6.47897e+06	1	457600	7	1011	34	2
457900	192	515700	Epsom North	704	Hobson Ward	7	Auckland City	02	Auckland Region	2.66855e+06	6.47865e+06	1	457900	5	969	67	2
592700	186	519720	Onehunga North East	706	Tamaki-Maungakiekie Ward	7	Auckland City	02	Auckland Region	2.66985e+06	6.47573e+06	1	592700	2	912	61	1
2164902	60	576300	Newtown West	4705	Southern Ward	47	Wellington City	09	Wellington Region	2.6588e+06	5.98662e+06	1	2164902	7	1006	21	2
1771100	81	560710	Feilding North	3903	Feilding Ward	39	Manawatu District	08	Manawatu-Wanganui Region	2.72978e+06	6.10677e+06	1	1771100	8	1070	36	3
2164400	6	576300	Newtown West	4705	Southern Ward	47	Wellington City	09	Wellington Region	2.6586e+06	5.98642e+06	1	2164400	5	962	2	2
2164500	117	576300	Newtown West	4705	Southern Ward	47	Wellington City	09	Wellington Region	2.65861e+06	5.98651e+06	1	2164500	5	963	41	2
1772000	66	560730	Feilding Central	3903	Feilding Ward	39	Manawatu District	08	Manawatu-Wanganui Region	2.7291e+06	6.10651e+06	1	1772000	9	1137	30	3
1771200	129	560730	Feilding Central	3903	Feilding Ward	39	Manawatu District	08	Manawatu-Wanganui Region	2.72951e+06	6.10652e+06	1	1771200	7	1010	45	2
1771400	102	560740	Feilding East	3903	Feilding Ward	39	Manawatu District	08	Manawatu-Wanganui Region	2.72976e+06	6.10649e+06	1	1771400	9	1114	46	3
1379202	102	544200	Mangapapa	2807	Gisborne Ward	28	Gisborne District	05	Gisborne Region	2.9471e+06	6.27146e+06	1	1379202	5	957	36	2
2164700	189	576300	Newtown West	4705	Southern Ward	47	Wellington City	09	Wellington Region	2.65883e+06	5.9868e+06	1	2164700	8	1037	85	3
592500	162	519720	Onehunga North East	706	Tamaki-Maungakiekie Ward	7	Auckland City	02	Auckland Region	2.67003e+06	6.47585e+06	1	592500	4	947	57	2
1378800	120	544200	Mangapapa	2807	Gisborne Ward	28	Gisborne District	05	Gisborne Region	2.94703e+06	6.27136e+06	1	1378800	8	1042	54	3
1378300	159	544200	Mangapapa	2807	Gisborne Ward	28	Gisborne District	05	Gisborne Region	2.94658e+06	6.27145e+06	1	1378300	9	1072	72	3
2163500	69	576300	Newtown West	4705	Southern Ward	47	Wellington City	09	Wellington Region	2.65885e+06	5.98716e+06	1	2163500	7	1018	24	2
1768900	81	560730	Feilding Central	3903	Feilding Ward	39	Manawatu District	08	Manawatu-Wanganui Region	2.72844e+06	6.10618e+06	1	1768900	8	1033	36	3
458200	261	515700	Epsom North	704	Hobson Ward	7	Auckland City	02	Auckland Region	2.66849e+06	6.47839e+06	1	458200	5	962	91	2
2163700	63	576300	Newtown West	4705	Southern Ward	47	Wellington City	09	Wellington Region	2.65875e+06	5.98707e+06	1	2163700	7	1018	22	2
2163400	87	576300	Newtown West	4705	Southern Ward	47	Wellington City	09	Wellington Region	2.65878e+06	5.98721e+06	1	2163400	3	930	29	1
2163300	186	576300	Newtown West	4705	Southern Ward	47	Wellington City	09	Wellington Region	2.6587e+06	5.98727e+06	1	2163300	10	1306	84	3
2163600	18	576300	Newtown West	4705	Southern Ward	47	Wellington City	09	Wellington Region	2.65865e+06	5.98704e+06	1	2163600	3	930	6	1
1380600	186	544500	Whataupoko	2807	Gisborne Ward	28	Gisborne District	05	Gisborne Region	2.94764e+06	6.27037e+06	1	1380600	7	1023	65	2
1379300	114	544200	Mangapapa	2807	Gisborne Ward	28	Gisborne District	05	Gisborne Region	2.94685e+06	6.27117e+06	1	1379300	4	944	40	2
2166600	90	576300	Newtown West	4705	Southern Ward	47	Wellington City	09	Wellington Region	2.65889e+06	5.98586e+06	1	2166600	4	940	31	2
2165800	63	576300	Newtown West	4705	Southern Ward	47	Wellington City	09	Wellington Region	2.6589e+06	5.98609e+06	1	2165800	8	1036	28	3
2167300	144	576400	Newtown East	4705	Southern Ward	47	Wellington City	09	Wellington Region	2.65911e+06	5.98667e+06	1	2167300	8	1064	65	3
593800	120	519720	Onehunga North East	706	Tamaki-Maungakiekie Ward	7	Auckland City	02	Auckland Region	2.66964e+06	6.47519e+06	1	593800	4	940	42	2
1772600	51	560740	Feilding East	3903	Feilding Ward	39	Manawatu District	08	Manawatu-Wanganui Region	2.72914e+06	6.1059e+06	1	1772600	9	1134	23	3
1380700	150	544500	Whataupoko	2807	Gisborne Ward	28	Gisborne District	05	Gisborne Region	2.94761e+06	6.27018e+06	1	1380700	9	1088	68	3
1379400	135	544500	Whataupoko	2807	Gisborne Ward	28	Gisborne District	05	Gisborne Region	2.94751e+06	6.27089e+06	1	1379400	9	1080	61	3
594400	183	519720	Onehunga North East	706	Tamaki-Maungakiekie Ward	7	Auckland City	02	Auckland Region	2.66997e+06	6.47484e+06	1	594400	9	1079	82	3
2166900	57	576400	Newtown East	4705	Southern Ward	47	Wellington City	09	Wellington Region	2.65901e+06	5.9868e+06	1	2166900	8	1047	26	3
2167100	63	576400	Newtown East	4705	Southern Ward	47	Wellington City	09	Wellington Region	2.65912e+06	5.98691e+06	1	2167100	5	967	22	2
593400	186	519720	Onehunga North East	706	Tamaki-Maungakiekie Ward	7	Auckland City	02	Auckland Region	2.66949e+06	6.47535e+06	1	593400	2	918	61	1
593900	114	519720	Onehunga North East	706	Tamaki-Maungakiekie Ward	7	Auckland City	02	Auckland Region	2.66966e+06	6.47501e+06	1	593900	6	980	40	2
594300	171	519720	Onehunga North East	706	Tamaki-Maungakiekie Ward	7	Auckland City	02	Auckland Region	2.67e+06	6.47509e+06	1	594300	4	950	60	2
2166300	102	576300	Newtown West	4705	Southern Ward	47	Wellington City	09	Wellington Region	2.65893e+06	5.98558e+06	1	2166300	7	1028	36	2
1380500	189	544500	Whataupoko	2807	Gisborne Ward	28	Gisborne District	05	Gisborne Region	2.94757e+06	6.27055e+06	1	1380500	7	1004	66	2
1380200	147	544500	Whataupoko	2807	Gisborne Ward	28	Gisborne District	05	Gisborne Region	2.94741e+06	6.27068e+06	1	1380200	7	1011	51	2
1772500	186	560740	Feilding East	3903	Feilding Ward	39	Manawatu District	08	Manawatu-Wanganui Region	2.72913e+06	6.1061e+06	1	1772500	4	948	65	2
1772200	66	560730	Feilding Central	3903	Feilding Ward	39	Manawatu District	08	Manawatu-Wanganui Region	2.72881e+06	6.10608e+06	1	1772200	9	1074	30	3
592400	168	519720	Onehunga North East	706	Tamaki-Maungakiekie Ward	7	Auckland City	02	Auckland Region	2.67019e+06	6.47586e+06	1	592400	3	929	55	1
2164901	66	576300	Newtown West	4705	Southern Ward	47	Wellington City	09	Wellington Region	2.65879e+06	5.98671e+06	1	2164901	7	1006	23	2
2164800	138	576300	Newtown West	4705	Southern Ward	47	Wellington City	09	Wellington Region	2.65873e+06	5.98668e+06	1	2164800	8	1070	62	3
2165100	21	576300	Newtown West	4705	Southern Ward	47	Wellington City	09	Wellington Region	2.65888e+06	5.98674e+06	1	2165100	8	1070	9	3
2163900	105	576300	Newtown West	4705	Southern Ward	47	Wellington City	09	Wellington Region	2.65885e+06	5.98699e+06	1	2163900	6	976	37	2
1772100	135	560730	Feilding Central	3903	Feilding Ward	39	Manawatu District	08	Manawatu-Wanganui Region	2.72854e+06	6.10601e+06	1	1772100	9	1075	61	3
1770800	120	560710	Feilding North	3903	Feilding Ward	39	Manawatu District	08	Manawatu-Wanganui Region	2.72958e+06	6.10685e+06	1	1770800	10	1277	54	3
1771301	204	560740	Feilding East	3903	Feilding Ward	39	Manawatu District	08	Manawatu-Wanganui Region	2.73008e+06	6.10686e+06	1	1771301	3	924	67	1
1378900	99	544200	Mangapapa	2807	Gisborne Ward	28	Gisborne District	05	Gisborne Region	2.94691e+06	6.27169e+06	1	1378900	8	1056	45	3
2165000	135	576300	Newtown West	4705	Southern Ward	47	Wellington City	09	Wellington Region	2.65886e+06	5.98663e+06	1	2165000	7	1015	47	2
2164200	114	576300	Newtown West	4705	Southern Ward	47	Wellington City	09	Wellington Region	2.6586e+06	5.98681e+06	1	2164200	8	1041	51	3
2164000	84	576300	Newtown West	4705	Southern Ward	47	Wellington City	09	Wellington Region	2.65862e+06	5.98695e+06	1	2164000	8	1041	38	3
1771500	126	560740	Feilding East	3903	Feilding Ward	39	Manawatu District	08	Manawatu-Wanganui Region	2.72999e+06	6.10661e+06	1	1771500	8	1072	57	3
1771700	117	560730	Feilding Central	3903	Feilding Ward	39	Manawatu District	08	Manawatu-Wanganui Region	2.7293e+06	6.10668e+06	1	1771700	9	1074	53	3
1771602	21	560740	Feilding East	3903	Feilding Ward	39	Manawatu District	08	Manawatu-Wanganui Region	2.73015e+06	6.10667e+06	1	1771602	3	927	7	1
1378200	117	544200	Mangapapa	2807	Gisborne Ward	28	Gisborne District	05	Gisborne Region	2.94668e+06	6.2716e+06	1	1378200	9	1129	53	3
2165400	183	576300	Newtown West	4705	Southern Ward	47	Wellington City	09	Wellington Region	2.6588e+06	5.98645e+06	1	2165400	6	988	64	2
2165300	129	576300	Newtown West	4705	Southern Ward	47	Wellington City	09	Wellington Region	2.65868e+06	5.9865e+06	1	2165300	6	994	45	2
2165500	192	576300	Newtown West	4705	Southern Ward	47	Wellington City	09	Wellington Region	2.65894e+06	5.98646e+06	1	2165500	8	1034	86	3
2164100	117	576300	Newtown West	4705	Southern Ward	47	Wellington City	09	Wellington Region	2.65869e+06	5.9869e+06	1	2164100	5	960	41	2
2164600	72	576300	Newtown West	4705	Southern Ward	47	Wellington City	09	Wellington Region	2.65885e+06	5.9869e+06	1	2164600	8	1038	32	3
1772400	165	560730	Feilding Central	3903	Feilding Ward	39	Manawatu District	08	Manawatu-Wanganui Region	2.72919e+06	6.10636e+06	1	1772400	8	1032	74	3
644900	135	521601	Howick West	806	Howick Ward	8	Manukau City	02	Auckland Region	2.68086e+06	6.47665e+06	1	644900	4	943	47	2
1772300	132	560730	Feilding Central	3903	Feilding Ward	39	Manawatu District	08	Manawatu-Wanganui Region	2.72897e+06	6.10623e+06	1	1772300	5	969	46	2
1378700	135	544200	Mangapapa	2807	Gisborne Ward	28	Gisborne District	05	Gisborne Region	2.94692e+06	6.27128e+06	1	1378700	8	1055	61	3
2165200	99	576300	Newtown West	4705	Southern Ward	47	Wellington City	09	Wellington Region	2.65894e+06	5.98666e+06	1	2165200	8	1038	45	3
2164300	138	576300	Newtown West	4705	Southern Ward	47	Wellington City	09	Wellington Region	2.65865e+06	5.98671e+06	1	2164300	5	962	48	2
2165700	66	576300	Newtown West	4705	Southern Ward	47	Wellington City	09	Wellington Region	2.65902e+06	5.98632e+06	1	2165700	7	1023	23	2
2165600	57	576300	Newtown West	4705	Southern Ward	47	Wellington City	09	Wellington Region	2.6589e+06	5.98633e+06	1	2165600	7	1023	20	2
1770900	105	560710	Feilding North	3903	Feilding Ward	39	Manawatu District	08	Manawatu-Wanganui Region	2.72969e+06	6.10693e+06	1	1770900	9	1114	47	3
595700	114	519710	Onehunga North West	706	Tamaki-Maungakiekie Ward	7	Auckland City	02	Auckland Region	2.66925e+06	6.47488e+06	1	595700	7	1023	40	2
2167600	66	576400	Newtown East	4705	Southern Ward	47	Wellington City	09	Wellington Region	2.65929e+06	5.9867e+06	1	2167600	8	1038	30	3
596000	93	519720	Onehunga North East	706	Tamaki-Maungakiekie Ward	7	Auckland City	02	Auckland Region	2.66966e+06	6.47487e+06	1	596000	5	968	33	2
596300	51	519710	Onehunga North West	706	Tamaki-Maungakiekie Ward	7	Auckland City	02	Auckland Region	2.66865e+06	6.47499e+06	1	596300	7	1023	18	2
595500	180	519710	Onehunga North West	706	Tamaki-Maungakiekie Ward	7	Auckland City	02	Auckland Region	2.66908e+06	6.47471e+06	1	595500	6	990	63	2
594902	177	519710	Onehunga North West	706	Tamaki-Maungakiekie Ward	7	Auckland City	02	Auckland Region	2.66902e+06	6.47507e+06	1	594902	8	1069	80	3
595100	174	519710	Onehunga North West	706	Tamaki-Maungakiekie Ward	7	Auckland City	02	Auckland Region	2.66925e+06	6.47513e+06	1	595100	9	1127	78	3
2168400	48	576400	Newtown East	4705	Southern Ward	47	Wellington City	09	Wellington Region	2.65912e+06	5.98659e+06	1	2168400	7	1020	17	2
595000	72	519710	Onehunga North West	706	Tamaki-Maungakiekie Ward	7	Auckland City	02	Auckland Region	2.66913e+06	6.47523e+06	1	595000	6	976	25	2
596401	39	519710	Onehunga North West	706	Tamaki-Maungakiekie Ward	7	Auckland City	02	Auckland Region	2.6686e+06	6.47489e+06	1	596401	7	1023	14	2
2168600	108	576400	Newtown East	4705	Southern Ward	47	Wellington City	09	Wellington Region	2.65915e+06	5.98646e+06	1	2168600	8	1045	49	3
2169200	105	576400	Newtown East	4705	Southern Ward	47	Wellington City	09	Wellington Region	2.65935e+06	5.98645e+06	1	2169200	9	1089	47	3
594800	120	519710	Onehunga North West	706	Tamaki-Maungakiekie Ward	7	Auckland City	02	Auckland Region	2.66879e+06	6.47513e+06	1	594800	6	976	42	2
202600	33	508620	Sunnybrae	503	Harbour Ward	5	North Shore City	02	Auckland Region	2.66573e+06	6.48934e+06	1	202600	2	915	11	1
596502	84	519710	Onehunga North West	706	Tamaki-Maungakiekie Ward	7	Auckland City	02	Auckland Region	2.66873e+06	6.47478e+06	1	596502	10	1175	38	3
596501	111	519710	Onehunga North West	706	Tamaki-Maungakiekie Ward	7	Auckland City	02	Auckland Region	2.66857e+06	6.47477e+06	1	596501	10	1175	50	3
594500	201	519710	Onehunga North West	706	Tamaki-Maungakiekie Ward	7	Auckland City	02	Auckland Region	2.66888e+06	6.47543e+06	1	594500	5	968	70	2
2166100	120	576300	Newtown West	4705	Southern Ward	47	Wellington City	09	Wellington Region	2.65881e+06	5.98554e+06	1	2166100	10	1257	54	3
1379800	186	544500	Whataupoko	2807	Gisborne Ward	28	Gisborne District	05	Gisborne Region	2.94741e+06	6.27121e+06	1	1379800	6	998	65	2
2167000	60	576400	Newtown East	4705	Southern Ward	47	Wellington City	09	Wellington Region	2.65904e+06	5.98673e+06	1	2167000	8	1047	27	3
594000	213	519720	Onehunga North East	706	Tamaki-Maungakiekie Ward	7	Auckland City	02	Auckland Region	2.66982e+06	6.47522e+06	1	594000	3	919	70	1
1380400	162	544500	Whataupoko	2807	Gisborne Ward	28	Gisborne District	05	Gisborne Region	2.94715e+06	6.27104e+06	1	1380400	7	1025	57	2
2166500	153	576300	Newtown West	4705	Southern Ward	47	Wellington City	09	Wellington Region	2.65892e+06	5.98576e+06	1	2166500	3	928	50	1
2165900	84	576300	Newtown West	4705	Southern Ward	47	Wellington City	09	Wellington Region	2.65904e+06	5.98618e+06	1	2165900	8	1036	38	3
593500	144	519710	Onehunga North West	706	Tamaki-Maungakiekie Ward	7	Auckland City	02	Auckland Region	2.66922e+06	6.47533e+06	1	593500	1	897	48	1
594600	171	519710	Onehunga North West	706	Tamaki-Maungakiekie Ward	7	Auckland City	02	Auckland Region	2.66907e+06	6.47543e+06	1	594600	4	953	60	2
593600	147	519720	Onehunga North East	706	Tamaki-Maungakiekie Ward	7	Auckland City	02	Auckland Region	2.66939e+06	6.47512e+06	1	593600	8	1033	66	3
1380900	90	544500	Whataupoko	2807	Gisborne Ward	28	Gisborne District	05	Gisborne Region	2.94771e+06	6.26997e+06	1	1380900	5	964	31	2
1380800	72	544500	Whataupoko	2807	Gisborne Ward	28	Gisborne District	05	Gisborne Region	2.94759e+06	6.2699e+06	1	1380800	5	964	25	2
1380300	144	544500	Whataupoko	2807	Gisborne Ward	28	Gisborne District	05	Gisborne Region	2.94727e+06	6.27086e+06	1	1380300	5	969	50	2
2167400	174	576400	Newtown East	4705	Southern Ward	47	Wellington City	09	Wellington Region	2.65921e+06	5.98682e+06	1	2167400	5	967	61	2
593300	198	519720	Onehunga North East	706	Tamaki-Maungakiekie Ward	7	Auckland City	02	Auckland Region	2.66944e+06	6.47548e+06	1	593300	4	936	69	2
2166400	114	576300	Newtown West	4705	Southern Ward	47	Wellington City	09	Wellington Region	2.65899e+06	5.98563e+06	1	2166400	6	983	40	2
2166200	135	576300	Newtown West	4705	Southern Ward	47	Wellington City	09	Wellington Region	2.65882e+06	5.98565e+06	1	2166200	10	1255	61	3
2166800	204	576300	Newtown West	4705	Southern Ward	47	Wellington City	09	Wellington Region	2.65892e+06	5.98597e+06	1	2166800	9	1085	92	3
594100	174	519720	Onehunga North East	706	Tamaki-Maungakiekie Ward	7	Auckland City	02	Auckland Region	2.66983e+06	6.47492e+06	1	594100	9	1106	78	3
593700	162	519720	Onehunga North East	706	Tamaki-Maungakiekie Ward	7	Auckland City	02	Auckland Region	2.66951e+06	6.47512e+06	1	593700	3	922	53	1
2166700	75	576300	Newtown West	4705	Southern Ward	47	Wellington City	09	Wellington Region	2.65899e+06	5.98588e+06	1	2166700	7	1023	26	2
2167200	45	576400	Newtown East	4705	Southern Ward	47	Wellington City	09	Wellington Region	2.65914e+06	5.98673e+06	1	2167200	8	1064	20	3
593100	99	519720	Onehunga North East	706	Tamaki-Maungakiekie Ward	7	Auckland City	02	Auckland Region	2.66964e+06	6.47559e+06	1	593100	3	930	33	1
598200	162	519810	Onehunga South West	706	Tamaki-Maungakiekie Ward	7	Auckland City	02	Auckland Region	2.66844e+06	6.47398e+06	1	598200	4	944	57	2
711164	114	523106	Millhouse	807	Botany-Clevedon Ward	8	Manukau City	02	Auckland Region	2.68096e+06	6.47407e+06	1	711164	2	900	38	1
597900	60	519810	Onehunga South West	706	Tamaki-Maungakiekie Ward	7	Auckland City	02	Auckland Region	2.66858e+06	6.47419e+06	1	597900	5	954	21	2
2170700	243	576400	Newtown East	4705	Southern Ward	47	Wellington City	09	Wellington Region	2.65939e+06	5.9861e+06	1	2170700	9	1138	109	3
598001	69	519810	Onehunga South West	706	Tamaki-Maungakiekie Ward	7	Auckland City	02	Auckland Region	2.66867e+06	6.47419e+06	1	598001	2	916	23	1
711148	54	523105	Golfland	807	Botany-Clevedon Ward	8	Manukau City	02	Auckland Region	2.68074e+06	6.47341e+06	1	711148	5	963	19	2
2170600	99	576400	Newtown East	4705	Southern Ward	47	Wellington City	09	Wellington Region	2.65923e+06	5.98604e+06	1	2170600	6	983	35	2
2170101	69	576400	Newtown East	4705	Southern Ward	47	Wellington City	09	Wellington Region	2.65947e+06	5.98642e+06	1	2170101	8	1032	31	3
2170102	138	576400	Newtown East	4705	Southern Ward	47	Wellington City	09	Wellington Region	2.65949e+06	5.98651e+06	1	2170102	8	1032	62	3
2169901	39	576400	Newtown East	4705	Southern Ward	47	Wellington City	09	Wellington Region	2.65952e+06	5.98652e+06	1	2169901	9	1089	18	3
204200	84	508620	Sunnybrae	503	Harbour Ward	5	North Shore City	02	Auckland Region	2.66598e+06	6.48881e+06	1	204200	5	959	29	2
204000	114	508620	Sunnybrae	503	Harbour Ward	5	North Shore City	02	Auckland Region	2.66587e+06	6.48893e+06	1	204000	5	959	40	2
204701	87	508620	Sunnybrae	503	Harbour Ward	5	North Shore City	02	Auckland Region	2.66629e+06	6.48845e+06	1	204701	7	1024	30	2
597600	219	519810	Onehunga South West	706	Tamaki-Maungakiekie Ward	7	Auckland City	02	Auckland Region	2.6687e+06	6.47446e+06	1	597600	2	912	72	1
595400	105	519710	Onehunga North West	706	Tamaki-Maungakiekie Ward	7	Auckland City	02	Auckland Region	2.66902e+06	6.47493e+06	1	595400	7	1024	37	2
2168800	75	576400	Newtown East	4705	Southern Ward	47	Wellington City	09	Wellington Region	2.65921e+06	5.98637e+06	1	2168800	8	1056	34	3
2168700	48	576400	Newtown East	4705	Southern Ward	47	Wellington City	09	Wellington Region	2.65911e+06	5.98634e+06	1	2168700	8	1056	22	3
596100	159	519710	Onehunga North West	706	Tamaki-Maungakiekie Ward	7	Auckland City	02	Auckland Region	2.66849e+06	6.47505e+06	1	596100	7	1008	56	2
595200	228	519710	Onehunga North West	706	Tamaki-Maungakiekie Ward	7	Auckland City	02	Auckland Region	2.66879e+06	6.47499e+06	1	595200	8	1033	103	3
595800	159	519710	Onehunga North West	706	Tamaki-Maungakiekie Ward	7	Auckland City	02	Auckland Region	2.66928e+06	6.47472e+06	1	595800	4	950	56	2
594901	132	519710	Onehunga North West	706	Tamaki-Maungakiekie Ward	7	Auckland City	02	Auckland Region	2.66897e+06	6.47523e+06	1	594901	5	968	46	2
594700	255	519710	Onehunga North West	706	Tamaki-Maungakiekie Ward	7	Auckland City	02	Auckland Region	2.6688e+06	6.47528e+06	1	594700	6	987	89	2
2168900	87	576400	Newtown East	4705	Southern Ward	47	Wellington City	09	Wellington Region	2.65914e+06	5.98623e+06	1	2168900	9	1086	39	3
2169000	54	576400	Newtown East	4705	Southern Ward	47	Wellington City	09	Wellington Region	2.65923e+06	5.98627e+06	1	2169000	8	1056	24	3
595600	87	519710	Onehunga North West	706	Tamaki-Maungakiekie Ward	7	Auckland City	02	Auckland Region	2.66923e+06	6.47499e+06	1	595600	7	1023	30	2
2169101	294	576400	Newtown East	4705	Southern Ward	47	Wellington City	09	Wellington Region	2.65935e+06	5.98662e+06	1	2169101	10	1190	132	3
595900	87	519720	Onehunga North East	706	Tamaki-Maungakiekie Ward	7	Auckland City	02	Auckland Region	2.66947e+06	6.47492e+06	1	595900	5	968	30	2
1382200	267	544701	Kaiti North	2807	Gisborne Ward	28	Gisborne District	05	Gisborne Region	2.94793e+06	6.26972e+06	1	1382200	4	937	93	2
2169102	75	576400	Newtown East	4705	Southern Ward	47	Wellington City	09	Wellington Region	2.65933e+06	5.98653e+06	1	2169102	10	1190	34	3
2168500	36	576400	Newtown East	4705	Southern Ward	47	Wellington City	09	Wellington Region	2.65916e+06	5.98653e+06	1	2168500	9	1086	16	3
595300	321	519710	Onehunga North West	706	Tamaki-Maungakiekie Ward	7	Auckland City	02	Auckland Region	2.66887e+06	6.47475e+06	1	595300	8	1071	144	3
596402	21	519710	Onehunga North West	706	Tamaki-Maungakiekie Ward	7	Auckland City	02	Auckland Region	2.6687e+06	6.4749e+06	1	596402	7	1023	7	2
2169300	213	576400	Newtown East	4705	Southern Ward	47	Wellington City	09	Wellington Region	2.65937e+06	5.98631e+06	1	2169300	9	1087	96	3
596200	240	519710	Onehunga North West	706	Tamaki-Maungakiekie Ward	7	Auckland City	02	Auckland Region	2.66839e+06	6.47481e+06	1	596200	5	971	84	2
2171300	105	576200	Berhampore	4705	Southern Ward	47	Wellington City	09	Wellington Region	2.65867e+06	5.98625e+06	1	2171300	6	986	37	2
206800	162	508610	Monarch Park	503	Harbour Ward	5	North Shore City	02	Auckland Region	2.66451e+06	6.48772e+06	1	206800	3	918	53	1
599900	87	519820	Onehunga South East	706	Tamaki-Maungakiekie Ward	7	Auckland City	02	Auckland Region	2.66972e+06	6.47462e+06	1	599900	10	1312	39	3
599200	66	519820	Onehunga South East	706	Tamaki-Maungakiekie Ward	7	Auckland City	02	Auckland Region	2.6695e+06	6.47478e+06	1	599200	6	988	23	2
2172600	96	576200	Berhampore	4705	Southern Ward	47	Wellington City	09	Wellington Region	2.65853e+06	5.98571e+06	1	2172600	8	1071	43	3
711177	165	523105	Golfland	807	Botany-Clevedon Ward	8	Manukau City	02	Auckland Region	2.68064e+06	6.47391e+06	1	711177	2	907	54	1
2171200	243	576200	Berhampore	4705	Southern Ward	47	Wellington City	09	Wellington Region	2.65851e+06	5.9859e+06	1	2171200	8	1049	109	3
204500	165	508620	Sunnybrae	503	Harbour Ward	5	North Shore City	02	Auckland Region	2.66629e+06	6.48876e+06	1	204500	1	888	54	1
597800	141	519810	Onehunga South West	706	Tamaki-Maungakiekie Ward	7	Auckland City	02	Auckland Region	2.66846e+06	6.47421e+06	1	597800	6	979	49	2
203900	57	508620	Sunnybrae	503	Harbour Ward	5	North Shore City	02	Auckland Region	2.66574e+06	6.48887e+06	1	203900	4	937	20	2
597000	87	519810	Onehunga South West	706	Tamaki-Maungakiekie Ward	7	Auckland City	02	Auckland Region	2.66828e+06	6.47408e+06	1	597000	2	905	29	1
2170800	156	576400	Newtown East	4705	Southern Ward	47	Wellington City	09	Wellington Region	2.65952e+06	5.98617e+06	1	2170800	9	1126	70	3
2170500	42	576400	Newtown East	4705	Southern Ward	47	Wellington City	09	Wellington Region	2.6594e+06	5.98623e+06	1	2170500	6	983	15	2
2171000	387	576400	Newtown East	4705	Southern Ward	47	Wellington City	09	Wellington Region	2.65909e+06	5.98603e+06	1	2171000	10	1462	174	3
204300	132	508620	Sunnybrae	503	Harbour Ward	5	North Shore City	02	Auckland Region	2.66613e+06	6.48893e+06	1	204300	4	945	46	2
596600	132	519710	Onehunga North West	706	Tamaki-Maungakiekie Ward	7	Auckland City	02	Auckland Region	2.66868e+06	6.47465e+06	1	596600	5	962	46	2
204100	54	508620	Sunnybrae	503	Harbour Ward	5	North Shore City	02	Auckland Region	2.66599e+06	6.48906e+06	1	204100	7	1024	19	2
597500	168	519810	Onehunga South West	706	Tamaki-Maungakiekie Ward	7	Auckland City	02	Auckland Region	2.66854e+06	6.47447e+06	1	597500	3	935	55	1
204400	90	508620	Sunnybrae	503	Harbour Ward	5	North Shore City	02	Auckland Region	2.66614e+06	6.48863e+06	1	204400	4	945	31	2
596900	183	519810	Onehunga South West	706	Tamaki-Maungakiekie Ward	7	Auckland City	02	Auckland Region	2.66839e+06	6.47444e+06	1	596900	7	1011	64	2
204702	60	508620	Sunnybrae	502	Central Ward	5	North Shore City	02	Auckland Region	2.66643e+06	6.48832e+06	1	204702	7	1024	21	2
598002	42	519810	Onehunga South West	706	Tamaki-Maungakiekie Ward	7	Auckland City	02	Auckland Region	2.66877e+06	6.47427e+06	1	598002	5	954	15	2
203700	252	508620	Sunnybrae	503	Harbour Ward	5	North Shore City	02	Auckland Region	2.6657e+06	6.48908e+06	1	203700	6	988	88	2
596800	204	519810	Onehunga South West	706	Tamaki-Maungakiekie Ward	7	Auckland City	02	Auckland Region	2.66825e+06	6.47442e+06	1	596800	6	982	71	2
2170901	57	576400	Newtown East	4705	Southern Ward	47	Wellington City	09	Wellington Region	2.65924e+06	5.98598e+06	1	2170901	6	984	20	2
2170200	90	576400	Newtown East	4705	Southern Ward	47	Wellington City	09	Wellington Region	2.65955e+06	5.98634e+06	1	2170200	4	939	31	2
204600	99	508620	Sunnybrae	503	Harbour Ward	5	North Shore City	02	Auckland Region	2.66621e+06	6.48854e+06	1	204600	6	999	35	2
862800	78	529900	Claudelands	1603	South Ward	16	Hamilton City	03	Waikato Region	2.71132e+06	6.37759e+06	1	862800	6	998	27	2
862900	78	529900	Claudelands	1603	South Ward	16	Hamilton City	03	Waikato Region	2.7114e+06	6.37761e+06	1	862900	6	976	27	2
207502	63	508610	Monarch Park	503	Harbour Ward	5	North Shore City	02	Auckland Region	2.66517e+06	6.48762e+06	1	207502	4	942	22	2
863900	18	529900	Claudelands	1603	South Ward	16	Hamilton City	03	Waikato Region	2.71107e+06	6.378e+06	1	863900	4	943	6	2
207700	201	508610	Monarch Park	503	Harbour Ward	5	North Shore City	02	Auckland Region	2.66489e+06	6.48723e+06	1	207700	3	930	66	1
208000	63	508610	Monarch Park	503	Harbour Ward	5	North Shore City	02	Auckland Region	2.66486e+06	6.48704e+06	1	208000	3	919	21	1
207400	123	508610	Monarch Park	503	Harbour Ward	5	North Shore City	02	Auckland Region	2.66478e+06	6.48753e+06	1	207400	2	906	41	1
862502	114	529900	Claudelands	1603	South Ward	16	Hamilton City	03	Waikato Region	2.71145e+06	6.37791e+06	1	862502	7	1026	40	2
863700	132	529900	Claudelands	1602	East Ward	16	Hamilton City	03	Waikato Region	2.71105e+06	6.37836e+06	1	863700	8	1069	59	3
208100	114	508610	Monarch Park	503	Harbour Ward	5	North Shore City	02	Auckland Region	2.66488e+06	6.48746e+06	1	208100	3	919	38	1
2173000	99	576200	Berhampore	4705	Southern Ward	47	Wellington City	09	Wellington Region	2.65847e+06	5.98563e+06	1	2173000	5	957	35	2
862700	96	529900	Claudelands	1603	South Ward	16	Hamilton City	03	Waikato Region	2.71122e+06	6.37778e+06	1	862700	6	998	34	2
207900	153	508610	Monarch Park	503	Harbour Ward	5	North Shore City	02	Auckland Region	2.66525e+06	6.4873e+06	1	207900	3	920	50	1
207800	144	508610	Monarch Park	503	Harbour Ward	5	North Shore City	02	Auckland Region	2.66512e+06	6.4873e+06	1	207800	2	913	48	1
206900	78	508610	Monarch Park	503	Harbour Ward	5	North Shore City	02	Auckland Region	2.66437e+06	6.48758e+06	1	206900	1	896	26	1
206500	174	508610	Monarch Park	503	Harbour Ward	5	North Shore City	02	Auckland Region	2.66436e+06	6.48786e+06	1	206500	3	924	57	1
600000	72	519820	Onehunga South East	706	Tamaki-Maungakiekie Ward	7	Auckland City	02	Auckland Region	2.66988e+06	6.47469e+06	1	600000	2	913	24	1
2172300	219	576200	Berhampore	4705	Southern Ward	47	Wellington City	09	Wellington Region	2.65861e+06	5.98546e+06	1	2172300	10	1327	99	3
2171900	87	576200	Berhampore	4705	Southern Ward	47	Wellington City	09	Wellington Region	2.65872e+06	5.98579e+06	1	2171900	4	951	30	2
599300	126	519820	Onehunga South East	706	Tamaki-Maungakiekie Ward	7	Auckland City	02	Auckland Region	2.66961e+06	6.47478e+06	1	599300	10	1381	57	3
2172000	186	576200	Berhampore	4705	Southern Ward	47	Wellington City	09	Wellington Region	2.65864e+06	5.98562e+06	1	2172000	10	1204	84	3
2171400	114	576200	Berhampore	4705	Southern Ward	47	Wellington City	09	Wellington Region	2.65856e+06	5.98604e+06	1	2171400	6	986	40	2
2172700	141	576200	Berhampore	4705	Southern Ward	47	Wellington City	09	Wellington Region	2.65851e+06	5.98546e+06	1	2172700	6	980	49	2
2172100	93	576200	Berhampore	4705	Southern Ward	47	Wellington City	09	Wellington Region	2.65875e+06	5.98566e+06	1	2172100	8	1043	42	3
2171600	102	576200	Berhampore	4705	Southern Ward	47	Wellington City	09	Wellington Region	2.65867e+06	5.98598e+06	1	2171600	10	1180	46	3
2171700	90	576200	Berhampore	4705	Southern Ward	47	Wellington City	09	Wellington Region	2.65878e+06	5.98599e+06	1	2171700	6	986	31	2
2172200	138	576200	Berhampore	4705	Southern Ward	47	Wellington City	09	Wellington Region	2.6587e+06	5.98554e+06	1	2172200	4	949	48	2
2171800	165	576200	Berhampore	4705	Southern Ward	47	Wellington City	09	Wellington Region	2.65873e+06	5.98587e+06	1	2171800	6	986	58	2
599100	72	519820	Onehunga South East	706	Tamaki-Maungakiekie Ward	7	Auckland City	02	Auckland Region	2.66941e+06	6.47479e+06	1	599100	6	988	25	2
864200	288	529900	Claudelands	1603	South Ward	16	Hamilton City	03	Waikato Region	2.71136e+06	6.37809e+06	1	864200	9	1115	130	3
603202	45	519900	Oranga	706	Tamaki-Maungakiekie Ward	7	Auckland City	02	Auckland Region	2.67023e+06	6.47509e+06	1	603202	8	1068	20	3
603201	108	519900	Oranga	706	Tamaki-Maungakiekie Ward	7	Auckland City	02	Auckland Region	2.67013e+06	6.47514e+06	1	603201	8	1068	49	3
603400	165	519900	Oranga	706	Tamaki-Maungakiekie Ward	7	Auckland City	02	Auckland Region	2.67012e+06	6.47485e+06	1	603400	7	1020	58	2
2173100	96	576200	Berhampore	4705	Southern Ward	47	Wellington City	09	Wellington Region	2.65847e+06	5.98554e+06	1	2173100	8	1043	43	3
207302	87	508610	Monarch Park	503	Harbour Ward	5	North Shore City	02	Auckland Region	2.66464e+06	6.48736e+06	1	207302	2	904	29	1
207503	54	508610	Monarch Park	503	Harbour Ward	5	North Shore City	02	Auckland Region	2.66526e+06	6.48752e+06	1	207503	4	942	19	2
207501	192	508610	Monarch Park	503	Harbour Ward	5	North Shore City	02	Auckland Region	2.66502e+06	6.48764e+06	1	207501	3	928	63	1
207000	165	508610	Monarch Park	503	Harbour Ward	5	North Shore City	02	Auckland Region	2.6646e+06	6.48764e+06	1	207000	4	948	58	2
862501	183	529900	Claudelands	1603	South Ward	16	Hamilton City	03	Waikato Region	2.71155e+06	6.37799e+06	1	862501	9	1107	82	3
863200	105	529900	Claudelands	1603	South Ward	16	Hamilton City	03	Waikato Region	2.71156e+06	6.37751e+06	1	863200	10	1172	47	3
863800	99	529900	Claudelands	1602	East Ward	16	Hamilton City	03	Waikato Region	2.71088e+06	6.37836e+06	1	863800	4	943	35	2
207301	75	508610	Monarch Park	503	Harbour Ward	5	North Shore City	02	Auckland Region	2.6646e+06	6.4875e+06	1	207301	2	904	25	1
862600	111	529900	Claudelands	1603	South Ward	16	Hamilton City	03	Waikato Region	2.71133e+06	6.37788e+06	1	862600	6	976	39	2
207200	105	508610	Monarch Park	503	Harbour Ward	5	North Shore City	02	Auckland Region	2.66443e+06	6.48737e+06	1	207200	1	896	35	1
207600	123	508610	Monarch Park	503	Harbour Ward	5	North Shore City	02	Auckland Region	2.66507e+06	6.48749e+06	1	207600	5	964	43	2
863000	213	529900	Claudelands	1603	South Ward	16	Hamilton City	03	Waikato Region	2.71159e+06	6.37771e+06	1	863000	6	990	75	2
600100	66	519820	Onehunga South East	706	Tamaki-Maungakiekie Ward	7	Auckland City	02	Auckland Region	2.66985e+06	6.47462e+06	1	600100	2	913	22	1
604100	105	519900	Oranga	706	Tamaki-Maungakiekie Ward	7	Auckland City	02	Auckland Region	2.67072e+06	6.4748e+06	1	604100	10	1208	47	3
603500	114	519900	Oranga	706	Tamaki-Maungakiekie Ward	7	Auckland City	02	Auckland Region	2.67032e+06	6.47494e+06	1	603500	9	1095	51	3
603900	78	519900	Oranga	706	Tamaki-Maungakiekie Ward	7	Auckland City	02	Auckland Region	2.67075e+06	6.47489e+06	1	603900	10	1149	35	3
603300	114	519900	Oranga	706	Tamaki-Maungakiekie Ward	7	Auckland City	02	Auckland Region	2.67034e+06	6.47507e+06	1	603300	8	1043	51	3
2831102	21	600813	Cape Wanbrow	6802	Oamaru Ward	68	Waitaki District	14	Otago Region	2.35042e+06	5.56369e+06	1	2831102	1	894	7	1
864000	138	529900	Claudelands	1603	South Ward	16	Hamilton City	03	Waikato Region	2.71106e+06	6.37814e+06	1	864000	3	932	46	1
864100	231	529900	Claudelands	1603	South Ward	16	Hamilton City	03	Waikato Region	2.71132e+06	6.37823e+06	1	864100	9	1113	104	3
868200	153	529600	Chartwell	1602	East Ward	16	Hamilton City	03	Waikato Region	2.71058e+06	6.3785e+06	1	868200	1	895	50	1
867700	114	529600	Chartwell	1602	East Ward	16	Hamilton City	03	Waikato Region	2.71016e+06	6.37896e+06	1	867700	4	947	40	2
606201	186	520000	Te Papapa	706	Tamaki-Maungakiekie Ward	7	Auckland City	02	Auckland Region	2.67096e+06	6.47472e+06	1	606201	9	1136	84	3
605700	213	520000	Te Papapa	706	Tamaki-Maungakiekie Ward	7	Auckland City	02	Auckland Region	2.67009e+06	6.47456e+06	1	605700	8	1065	96	3
605800	126	520000	Te Papapa	706	Tamaki-Maungakiekie Ward	7	Auckland City	02	Auckland Region	2.67031e+06	6.47452e+06	1	605800	3	925	42	1
868000	183	529600	Chartwell	1602	East Ward	16	Hamilton City	03	Waikato Region	2.71047e+06	6.3788e+06	1	868000	1	884	60	1
2441500	75	585802	Amberley	5804	Amberley Ward	58	Hurunui District	13	Canterbury Region	2.48846e+06	5.78428e+06	1	2441500	7	1003	26	2
2441400	210	585802	Amberley	5804	Amberley Ward	58	Hurunui District	13	Canterbury Region	2.48821e+06	5.78436e+06	1	2441400	5	964	74	2
2441701	42	585802	Amberley	5804	Amberley Ward	58	Hurunui District	13	Canterbury Region	2.48793e+06	5.78375e+06	1	2441701	8	1072	19	3
603800	162	519900	Oranga	706	Tamaki-Maungakiekie Ward	7	Auckland City	02	Auckland Region	2.67077e+06	6.47503e+06	1	603800	10	1149	73	3
604200	75	519900	Oranga	706	Tamaki-Maungakiekie Ward	7	Auckland City	02	Auckland Region	2.67052e+06	6.47478e+06	1	604200	10	1138	34	3
604000	219	519900	Oranga	706	Tamaki-Maungakiekie Ward	7	Auckland City	02	Auckland Region	2.67095e+06	6.47486e+06	1	604000	9	1090	99	3
603700	174	519900	Oranga	706	Tamaki-Maungakiekie Ward	7	Auckland City	02	Auckland Region	2.67051e+06	6.47498e+06	1	603700	9	1091	78	3
604300	150	519900	Oranga	706	Tamaki-Maungakiekie Ward	7	Auckland City	02	Auckland Region	2.67031e+06	6.47479e+06	1	604300	10	1138	68	3
2443500	27	586306	Rangiora North	5903	Rangiora Ward	59	Waimakariri District	13	Canterbury Region	2.47685e+06	5.76709e+06	1	2443500	8	1044	12	3
2443600	27	586306	Rangiora North	5903	Rangiora Ward	59	Waimakariri District	13	Canterbury Region	2.47705e+06	5.76711e+06	1	2443600	8	1044	12	3
2443400	87	586306	Rangiora North	5903	Rangiora Ward	59	Waimakariri District	13	Canterbury Region	2.4767e+06	5.76705e+06	1	2443400	6	993	30	2
2442500	228	586306	Rangiora North	5903	Rangiora Ward	59	Waimakariri District	13	Canterbury Region	2.47637e+06	5.7674e+06	1	2442500	5	973	80	2
2443100	189	586306	Rangiora North	5903	Rangiora Ward	59	Waimakariri District	13	Canterbury Region	2.47676e+06	5.76747e+06	1	2443100	5	962	66	2
2443000	201	586306	Rangiora North	5903	Rangiora Ward	59	Waimakariri District	13	Canterbury Region	2.47655e+06	5.7676e+06	1	2443000	7	1023	70	2
867800	171	529600	Chartwell	1602	East Ward	16	Hamilton City	03	Waikato Region	2.71025e+06	6.37907e+06	1	867800	4	935	60	2
2441901	87	585802	Amberley	5804	Amberley Ward	58	Hurunui District	13	Canterbury Region	2.48801e+06	5.78276e+06	1	2441901	4	952	30	2
2442002	39	585802	Amberley	5804	Amberley Ward	58	Hurunui District	13	Canterbury Region	2.48855e+06	5.78306e+06	1	2442002	4	952	14	2
2442001	147	585802	Amberley	5804	Amberley Ward	58	Hurunui District	13	Canterbury Region	2.4882e+06	5.78318e+06	1	2442001	8	1033	66	3
605600	357	520000	Te Papapa	706	Tamaki-Maungakiekie Ward	7	Auckland City	02	Auckland Region	2.67057e+06	6.47462e+06	1	605600	7	1023	125	2
605500	123	520000	Te Papapa	706	Tamaki-Maungakiekie Ward	7	Auckland City	02	Auckland Region	2.67031e+06	6.47465e+06	1	605500	7	1030	43	2
606202	114	520000	Te Papapa	706	Tamaki-Maungakiekie Ward	7	Auckland City	02	Auckland Region	2.67081e+06	6.47449e+06	1	606202	10	1232	51	3
868100	231	529600	Chartwell	1602	East Ward	16	Hamilton City	03	Waikato Region	2.71076e+06	6.37862e+06	1	868100	5	966	81	2
2441703	69	585802	Amberley	5804	Amberley Ward	58	Hurunui District	13	Canterbury Region	2.48798e+06	5.78342e+06	1	2441703	8	1072	31	3
2441702	57	585802	Amberley	5804	Amberley Ward	58	Hurunui District	13	Canterbury Region	2.48776e+06	5.78361e+06	1	2441702	8	1072	26	3
606203	90	520000	Te Papapa	706	Tamaki-Maungakiekie Ward	7	Auckland City	02	Auckland Region	2.67092e+06	6.47459e+06	1	606203	10	1232	40	3
2838300	87	601030	Oamaru Central	6802	Oamaru Ward	68	Waitaki District	14	Otago Region	2.34935e+06	5.5653e+06	1	2838300	5	971	30	2
2838700	84	601030	Oamaru Central	6802	Oamaru Ward	68	Waitaki District	14	Otago Region	2.34988e+06	5.56526e+06	1	2838700	7	1020	29	2
2445101	150	586302	Rangiora West	5903	Rangiora Ward	59	Waimakariri District	13	Canterbury Region	2.47693e+06	5.76657e+06	1	2445101	8	1051	68	3
2445102	75	586302	Rangiora West	5903	Rangiora Ward	59	Waimakariri District	13	Canterbury Region	2.47703e+06	5.76665e+06	1	2445102	8	1051	34	3
2445200	90	586303	Rangiora East	5903	Rangiora Ward	59	Waimakariri District	13	Canterbury Region	2.47712e+06	5.76663e+06	1	2445200	6	979	31	2
2444900	168	586302	Rangiora West	5903	Rangiora Ward	59	Waimakariri District	13	Canterbury Region	2.47666e+06	5.76634e+06	1	2444900	3	930	55	1
2838100	48	601040	Oamaru South	6802	Oamaru Ward	68	Waitaki District	14	Otago Region	2.35035e+06	5.56432e+06	1	2838100	4	941	17	2
2837600	42	601040	Oamaru South	6802	Oamaru Ward	68	Waitaki District	14	Otago Region	2.35008e+06	5.56493e+06	1	2837600	5	955	15	2
2837500	81	601040	Oamaru South	6802	Oamaru Ward	68	Waitaki District	14	Otago Region	2.34995e+06	5.56497e+06	1	2837500	8	1047	36	3
2445300	141	586302	Rangiora West	5903	Rangiora Ward	59	Waimakariri District	13	Canterbury Region	2.47675e+06	5.76621e+06	1	2445300	6	978	49	2
2445401	192	586302	Rangiora West	5903	Rangiora Ward	59	Waimakariri District	13	Canterbury Region	2.47705e+06	5.76623e+06	1	2445401	5	960	67	2
2445402	96	586303	Rangiora East	5903	Rangiora Ward	59	Waimakariri District	13	Canterbury Region	2.47721e+06	5.76633e+06	1	2445402	4	942	34	2
2444200	123	586306	Rangiora North	5903	Rangiora Ward	59	Waimakariri District	13	Canterbury Region	2.47692e+06	5.76739e+06	1	2444200	9	1081	55	3
2837800	54	601040	Oamaru South	6802	Oamaru Ward	68	Waitaki District	14	Otago Region	2.35004e+06	5.56471e+06	1	2837800	4	941	19	2
2837900	165	601040	Oamaru South	6802	Oamaru Ward	68	Waitaki District	14	Otago Region	2.34993e+06	5.56445e+06	1	2837900	6	992	58	2
2443300	51	586306	Rangiora North	5903	Rangiora Ward	59	Waimakariri District	13	Canterbury Region	2.47657e+06	5.76703e+06	1	2443300	6	993	18	2
2443700	198	586306	Rangiora North	5903	Rangiora Ward	59	Waimakariri District	13	Canterbury Region	2.4769e+06	5.76767e+06	1	2443700	9	1102	89	3
2446302	105	586302	Rangiora West	5903	Rangiora Ward	59	Waimakariri District	13	Canterbury Region	2.47722e+06	5.7655e+06	1	2446302	3	933	35	1
2446002	204	586302	Rangiora West	5903	Rangiora Ward	59	Waimakariri District	13	Canterbury Region	2.47675e+06	5.76556e+06	1	2446002	5	967	71	2
2446205	69	586303	Rangiora East	5903	Rangiora Ward	59	Waimakariri District	13	Canterbury Region	2.47739e+06	5.7655e+06	1	2446205	7	1017	24	2
2840100	111	601030	Oamaru Central	6802	Oamaru Ward	68	Waitaki District	14	Otago Region	2.349e+06	5.56553e+06	1	2840100	4	950	39	2
2839600	102	601030	Oamaru Central	6802	Oamaru Ward	68	Waitaki District	14	Otago Region	2.34882e+06	5.56552e+06	1	2839600	7	1027	36	2
2840200	87	601030	Oamaru Central	6802	Oamaru Ward	68	Waitaki District	14	Otago Region	2.34943e+06	5.56551e+06	1	2840200	4	953	30	2
2839700	75	601030	Oamaru Central	6802	Oamaru Ward	68	Waitaki District	14	Otago Region	2.34899e+06	5.56534e+06	1	2839700	7	1027	26	2
2840700	39	601030	Oamaru Central	6802	Oamaru Ward	68	Waitaki District	14	Otago Region	2.35055e+06	5.56628e+06	1	2840700	9	1091	18	3
480800	120	516101	Remuera West	704	Hobson Ward	7	Auckland City	02	Auckland Region	2.66918e+06	6.47965e+06	1	480800	4	951	42	2
480601	192	516101	Remuera West	704	Hobson Ward	7	Auckland City	02	Auckland Region	2.66903e+06	6.47974e+06	1	480601	2	915	63	1
2446301	177	586302	Rangiora West	5903	Rangiora Ward	59	Waimakariri District	13	Canterbury Region	2.47714e+06	5.76581e+06	1	2446301	7	1024	62	2
2446004	165	586302	Rangiora West	5903	Rangiora Ward	59	Waimakariri District	13	Canterbury Region	2.47697e+06	5.76559e+06	1	2446004	6	989	58	2
2446005	153	586302	Rangiora West	5903	Rangiora Ward	59	Waimakariri District	13	Canterbury Region	2.47687e+06	5.76558e+06	1	2446005	5	973	54	2
2838000	120	601040	Oamaru South	6802	Oamaru Ward	68	Waitaki District	14	Otago Region	2.35016e+06	5.56441e+06	1	2838000	3	933	40	1
2838200	78	601040	Oamaru South	6802	Oamaru Ward	68	Waitaki District	14	Otago Region	2.35037e+06	5.56403e+06	1	2838200	4	941	27	2
2838400	87	601030	Oamaru Central	6802	Oamaru Ward	68	Waitaki District	14	Otago Region	2.34953e+06	5.56531e+06	1	2838400	5	971	30	2
2838600	120	601030	Oamaru Central	6802	Oamaru Ward	68	Waitaki District	14	Otago Region	2.34977e+06	5.56531e+06	1	2838600	8	1033	54	3
2838500	117	601030	Oamaru Central	6802	Oamaru Ward	68	Waitaki District	14	Otago Region	2.34965e+06	5.56535e+06	1	2838500	6	980	41	2
2445500	36	586302	Rangiora West	5903	Rangiora Ward	59	Waimakariri District	13	Canterbury Region	2.47691e+06	5.76688e+06	1	2445500	4	942	13	2
2444600	63	586302	Rangiora West	5903	Rangiora Ward	59	Waimakariri District	13	Canterbury Region	2.47664e+06	5.76685e+06	1	2444600	8	1034	28	3
2445600	6	586303	Rangiora East	5903	Rangiora Ward	59	Waimakariri District	13	Canterbury Region	2.47711e+06	5.76687e+06	1	2445600	4	942	2	2
2445000	114	586302	Rangiora West	5903	Rangiora Ward	59	Waimakariri District	13	Canterbury Region	2.4768e+06	5.76653e+06	1	2445000	6	979	40	2
2837700	54	601040	Oamaru South	6802	Oamaru Ward	68	Waitaki District	14	Otago Region	2.34991e+06	5.56473e+06	1	2837700	5	955	19	2
2187000	135	576700	Roseneath	4703	Lambton Ward	47	Wellington City	09	Wellington Region	2.66062e+06	5.98892e+06	1	2187000	3	922	45	1
2841800	9	601030	Oamaru Central	6802	Oamaru Ward	68	Waitaki District	14	Otago Region	2.3502e+06	5.56552e+06	1	2841800	8	1064	4	3
2841700	6	601030	Oamaru Central	6802	Oamaru Ward	68	Waitaki District	14	Otago Region	2.35005e+06	5.5655e+06	1	2841700	4	953	2	2
614100	72	519200	Mt St John	704	Hobson Ward	7	Auckland City	02	Auckland Region	2.66927e+06	6.47853e+06	1	614100	4	949	25	2
613800	24	519200	Mt St John	704	Hobson Ward	7	Auckland City	02	Auckland Region	2.66903e+06	6.47886e+06	1	613800	4	949	8	2
2448204	222	586305	Kingsbury	5903	Rangiora Ward	59	Waimakariri District	13	Canterbury Region	2.47638e+06	5.76836e+06	1	2448204	1	872	73	1
2841900	48	601030	Oamaru Central	6802	Oamaru Ward	68	Waitaki District	14	Otago Region	2.35e+06	5.56521e+06	1	2841900	8	1064	22	3
350900	336	510401	Kauri Park	503	Harbour Ward	5	North Shore City	02	Auckland Region	2.66429e+06	6.48669e+06	1	350900	7	1011	118	2
2448213	123	586305	Kingsbury	5903	Rangiora Ward	59	Waimakariri District	13	Canterbury Region	2.47637e+06	5.76791e+06	1	2448213	1	895	41	1
2448216	120	586305	Kingsbury	5903	Rangiora Ward	59	Waimakariri District	13	Canterbury Region	2.47688e+06	5.76801e+06	1	2448216	3	929	40	1
613700	99	519200	Mt St John	704	Hobson Ward	7	Auckland City	02	Auckland Region	2.66894e+06	6.47892e+06	1	613700	10	1162	45	3
481500	162	516101	Remuera West	704	Hobson Ward	7	Auckland City	02	Auckland Region	2.66929e+06	6.47949e+06	1	481500	5	957	57	2
2841200	9	601030	Oamaru Central	6802	Oamaru Ward	68	Waitaki District	14	Otago Region	2.35017e+06	5.56591e+06	1	2841200	8	1064	4	3
2841100	6	601030	Oamaru Central	6802	Oamaru Ward	68	Waitaki District	14	Otago Region	2.35039e+06	5.56597e+06	1	2841100	8	1064	3	3
2841300	3	601030	Oamaru Central	6802	Oamaru Ward	68	Waitaki District	14	Otago Region	2.35034e+06	5.56585e+06	1	2841300	8	1064	1	3
2185200	39	576800	Hataitai	4704	Eastern Ward	47	Wellington City	09	Wellington Region	2.66012e+06	5.988e+06	1	2185200	2	918	13	1
2840300	102	601030	Oamaru Central	6802	Oamaru Ward	68	Waitaki District	14	Otago Region	2.34921e+06	5.56541e+06	1	2840300	5	973	36	2
480900	135	516101	Remuera West	704	Hobson Ward	7	Auckland City	02	Auckland Region	2.6691e+06	6.47964e+06	1	480900	7	1001	47	2
480603	186	516101	Remuera West	704	Hobson Ward	7	Auckland City	02	Auckland Region	2.66917e+06	6.47995e+06	1	480603	3	928	61	1
2839900	81	601030	Oamaru Central	6802	Oamaru Ward	68	Waitaki District	14	Otago Region	2.34938e+06	5.56585e+06	1	2839900	7	1005	28	2
480700	36	516101	Remuera West	704	Hobson Ward	7	Auckland City	02	Auckland Region	2.66923e+06	6.47976e+06	1	480700	1	888	12	1
2446006	171	586302	Rangiora West	5903	Rangiora Ward	59	Waimakariri District	13	Canterbury Region	2.47664e+06	5.76595e+06	1	2446006	4	947	60	2
2446100	171	586302	Rangiora West	5903	Rangiora Ward	59	Waimakariri District	13	Canterbury Region	2.47708e+06	5.76599e+06	1	2446100	7	1016	60	2
2446007	192	586302	Rangiora West	5903	Rangiora Ward	59	Waimakariri District	13	Canterbury Region	2.47684e+06	5.76597e+06	1	2446007	4	942	67	2
480602	255	516101	Remuera West	704	Hobson Ward	7	Auckland City	02	Auckland Region	2.66908e+06	6.47986e+06	1	480602	3	931	84	1
480500	138	516101	Remuera West	704	Hobson Ward	7	Auckland City	02	Auckland Region	2.66945e+06	6.48015e+06	1	480500	2	916	46	1
2483804	117	587302	Halswell South	6004	Riccarton-Wigram Ward	60	Christchurch City	13	Canterbury Region	2.47516e+06	5.73601e+06	1	2483804	3	924	39	1
2843800	90	601020	Orana Park	6802	Oamaru Ward	68	Waitaki District	14	Otago Region	2.35064e+06	5.56651e+06	1	2843800	9	1091	40	3
614502	54	519200	Mt St John	704	Hobson Ward	7	Auckland City	02	Auckland Region	2.66897e+06	6.47844e+06	1	614502	4	940	19	2
2134200	69	573101	Willis Street-Cambridge Terrace	4703	Lambton Ward	47	Wellington City	09	Wellington Region	2.65891e+06	5.98856e+06	1	2134200	7	1028	24	2
2843500	81	601020	Orana Park	6802	Oamaru Ward	68	Waitaki District	14	Otago Region	2.35079e+06	5.56685e+06	1	2843500	10	1169	36	3
2841500	3	601030	Oamaru Central	6802	Oamaru Ward	68	Waitaki District	14	Otago Region	2.35013e+06	5.56566e+06	1	2841500	4	953	1	2
2841400	6	601030	Oamaru Central	6802	Oamaru Ward	68	Waitaki District	14	Otago Region	2.35001e+06	5.56576e+06	1	2841400	4	953	2	2
613600	93	519200	Mt St John	704	Hobson Ward	7	Auckland City	02	Auckland Region	2.66883e+06	6.47892e+06	1	613600	10	1162	42	3
614300	153	519200	Mt St John	704	Hobson Ward	7	Auckland City	02	Auckland Region	2.66874e+06	6.47845e+06	1	614300	8	1067	69	3
2448904	198	586304	Southbrook	5903	Rangiora Ward	59	Waimakariri District	13	Canterbury Region	2.47728e+06	5.76515e+06	1	2448904	4	946	69	2
2448903	138	586304	Southbrook	5903	Rangiora Ward	59	Waimakariri District	13	Canterbury Region	2.4771e+06	5.76515e+06	1	2448903	4	945	48	2
481600	114	516101	Remuera West	704	Hobson Ward	7	Auckland City	02	Auckland Region	2.66948e+06	6.4794e+06	1	481600	1	888	38	1
613900	117	519200	Mt St John	704	Hobson Ward	7	Auckland City	02	Auckland Region	2.66878e+06	6.4787e+06	1	613900	7	1004	41	2
2448215	219	586305	Kingsbury	5903	Rangiora Ward	59	Waimakariri District	13	Canterbury Region	2.47673e+06	5.7681e+06	1	2448215	3	926	72	1
2448214	159	586305	Kingsbury	5903	Rangiora Ward	59	Waimakariri District	13	Canterbury Region	2.47645e+06	5.76806e+06	1	2448214	2	903	52	1
2842000	3	601030	Oamaru Central	6802	Oamaru Ward	68	Waitaki District	14	Otago Region	2.35017e+06	5.5652e+06	1	2842000	8	1064	1	3
2840900	30	601030	Oamaru Central	6802	Oamaru Ward	68	Waitaki District	14	Otago Region	2.35046e+06	5.56611e+06	1	2840900	8	1064	14	3
351201	129	510401	Kauri Park	503	Harbour Ward	5	North Shore City	02	Auckland Region	2.66406e+06	6.48665e+06	1	351201	5	964	45	2
2448207	123	586305	Kingsbury	5903	Rangiora Ward	59	Waimakariri District	13	Canterbury Region	2.4763e+06	5.76775e+06	1	2448207	2	909	41	1
2448208	90	586305	Kingsbury	5903	Rangiora Ward	59	Waimakariri District	13	Canterbury Region	2.47685e+06	5.76785e+06	1	2448208	2	909	30	1
2841000	33	601030	Oamaru Central	6802	Oamaru Ward	68	Waitaki District	14	Otago Region	2.35022e+06	5.56602e+06	1	2841000	8	1064	15	3
1203206	9	536810	Mt Maunganui North	2301	Mount Maunganui-Papamoa Ward	23	Tauranga City	04	Bay of Plenty Region	2.79177e+06	6.38991e+06	1	1203206	9	1110	4	3
354900	57	510401	Kauri Park	503	Harbour Ward	5	North Shore City	02	Auckland Region	2.66432e+06	6.48709e+06	1	354900	4	940	20	2
91800	126	502700	Mairtown	205	Okara Ward	2	Whangarei District	01	Northland Region	2.63041e+06	6.60928e+06	1	91800	8	1034	57	3
355500	153	510500	Birkenhead East	503	Harbour Ward	5	North Shore City	02	Auckland Region	2.66463e+06	6.48711e+06	1	355500	1	877	50	1
354100	111	510401	Kauri Park	503	Harbour Ward	5	North Shore City	02	Auckland Region	2.6642e+06	6.48731e+06	1	354100	3	924	37	1
355400	108	510500	Birkenhead East	503	Harbour Ward	5	North Shore City	02	Auckland Region	2.66461e+06	6.48724e+06	1	355400	3	927	36	1
2333000	120	583000	Tahunanui	5299	Area Outside Ward	52	Nelson City	17	Nelson Region	2.53032e+06	5.99147e+06	1	2333000	10	1141	54	3
355601	54	510500	Birkenhead East	503	Harbour Ward	5	North Shore City	02	Auckland Region	2.66446e+06	6.4871e+06	1	355601	3	920	18	1
617700	108	519400	One Tree Hill East	704	Hobson Ward	7	Auckland City	02	Auckland Region	2.67013e+06	6.47636e+06	1	617700	1	896	36	1
2843700	72	601020	Orana Park	6802	Oamaru Ward	68	Waitaki District	14	Otago Region	2.3507e+06	5.56662e+06	1	2843700	8	1063	32	3
2843900	60	601020	Orana Park	6802	Oamaru Ward	68	Waitaki District	14	Otago Region	2.35061e+06	5.5664e+06	1	2843900	9	1091	27	3
614400	96	519200	Mt St John	704	Hobson Ward	7	Auckland City	02	Auckland Region	2.66884e+06	6.47842e+06	1	614400	4	940	34	2
2843200	78	601020	Orana Park	6802	Oamaru Ward	68	Waitaki District	14	Otago Region	2.35083e+06	5.56697e+06	1	2843200	8	1042	35	3
2843600	60	601020	Orana Park	6802	Oamaru Ward	68	Waitaki District	14	Otago Region	2.35074e+06	5.56674e+06	1	2843600	8	1063	27	3
1495800	45	548000	Mayfair	3005	Hastings Ward	30	Hastings District	06	Hawke's Bay Region	2.84074e+06	6.16717e+06	1	1495800	7	1004	16	2
617900	177	519400	One Tree Hill East	706	Tamaki-Maungakiekie Ward	7	Auckland City	02	Auckland Region	2.67025e+06	6.47621e+06	1	617900	2	913	58	1
95200	129	502600	Kensington	205	Okara Ward	2	Whangarei District	01	Northland Region	2.63017e+06	6.60923e+06	1	95200	6	984	45	2
355800	183	510500	Birkenhead East	503	Harbour Ward	5	North Shore City	02	Auckland Region	2.66455e+06	6.48658e+06	1	355800	6	982	64	2
2527804	201	588402	Sawyers Arms	6001	Shirley-Papanui Ward	60	Christchurch City	13	Canterbury Region	2.47728e+06	5.74732e+06	1	2527804	2	909	66	1
2583900	162	594300	Opawa	6006	Spreydon-Heathcote Ward	60	Christchurch City	13	Canterbury Region	2.48193e+06	5.73951e+06	1	2583900	7	1018	57	2
92300	141	502700	Mairtown	205	Okara Ward	2	Whangarei District	01	Northland Region	2.63066e+06	6.60921e+06	1	92300	8	1043	63	3
96100	165	502800	Regent	205	Okara Ward	2	Whangarei District	01	Northland Region	2.63012e+06	6.60848e+06	1	96100	9	1113	74	3
96000	135	502800	Regent	205	Okara Ward	2	Whangarei District	01	Northland Region	2.63026e+06	6.60888e+06	1	96000	9	1081	61	3
97200	66	502800	Regent	205	Okara Ward	2	Whangarei District	01	Northland Region	2.63044e+06	6.60841e+06	1	97200	7	1013	23	2
96700	36	502800	Regent	205	Okara Ward	2	Whangarei District	01	Northland Region	2.63077e+06	6.60906e+06	1	96700	7	1020	13	2
95800	57	502800	Regent	205	Okara Ward	2	Whangarei District	01	Northland Region	2.63002e+06	6.60877e+06	1	95800	6	979	20	2
96400	57	502800	Regent	205	Okara Ward	2	Whangarei District	01	Northland Region	2.63029e+06	6.6086e+06	1	96400	10	1146	26	3
618200	222	519400	One Tree Hill East	706	Tamaki-Maungakiekie Ward	7	Auckland City	02	Auckland Region	2.67015e+06	6.47604e+06	1	618200	2	914	73	1
2585100	162	594300	Opawa	6006	Spreydon-Heathcote Ward	60	Christchurch City	13	Canterbury Region	2.48253e+06	5.73864e+06	1	2585100	4	942	57	2
355700	189	510500	Birkenhead East	503	Harbour Ward	5	North Shore City	02	Auckland Region	2.66448e+06	6.48677e+06	1	355700	4	942	66	2
97600	36	503000	Vinetown	205	Okara Ward	2	Whangarei District	01	Northland Region	2.62966e+06	6.60792e+06	1	97600	9	1100	16	3
97800	213	503000	Vinetown	205	Okara Ward	2	Whangarei District	01	Northland Region	2.62944e+06	6.60777e+06	1	97800	9	1105	96	3
98800	33	503000	Vinetown	205	Okara Ward	2	Whangarei District	01	Northland Region	2.6297e+06	6.60724e+06	1	98800	9	1123	15	3
490900	84	516001	Mt Hobson	704	Hobson Ward	7	Auckland City	02	Auckland Region	2.66904e+06	6.47903e+06	1	490900	6	989	29	2
491100	99	516001	Mt Hobson	704	Hobson Ward	7	Auckland City	02	Auckland Region	2.6693e+06	6.47921e+06	1	491100	1	897	33	1
97900	90	503000	Vinetown	205	Okara Ward	2	Whangarei District	01	Northland Region	2.62919e+06	6.60746e+06	1	97900	6	981	31	2
98100	93	503000	Vinetown	205	Okara Ward	2	Whangarei District	01	Northland Region	2.62951e+06	6.60765e+06	1	98100	8	1070	42	3
98700	111	503000	Vinetown	205	Okara Ward	2	Whangarei District	01	Northland Region	2.62942e+06	6.60717e+06	1	98700	10	1190	50	3
1195900	162	536810	Mt Maunganui North	2301	Mount Maunganui-Papamoa Ward	23	Tauranga City	04	Bay of Plenty Region	2.79148e+06	6.39089e+06	1	1195900	2	909	53	1
491200	162	516001	Mt Hobson	704	Hobson Ward	7	Auckland City	02	Auckland Region	2.66949e+06	6.47892e+06	1	491200	1	883	53	1
97700	72	503000	Vinetown	205	Okara Ward	2	Whangarei District	01	Northland Region	2.62911e+06	6.6076e+06	1	97700	9	1100	32	3
97300	78	502800	Regent	205	Okara Ward	2	Whangarei District	01	Northland Region	2.63029e+06	6.60821e+06	1	97300	9	1113	35	3
98000	33	503000	Vinetown	205	Okara Ward	2	Whangarei District	01	Northland Region	2.62934e+06	6.60757e+06	1	98000	6	981	12	2
98500	114	503000	Vinetown	205	Okara Ward	2	Whangarei District	01	Northland Region	2.62954e+06	6.60737e+06	1	98500	8	1041	51	3
96600	132	502800	Regent	205	Okara Ward	2	Whangarei District	01	Northland Region	2.63059e+06	6.60901e+06	1	96600	4	944	46	2
95900	153	502800	Regent	205	Okara Ward	2	Whangarei District	01	Northland Region	2.63019e+06	6.609e+06	1	95900	7	1027	54	2
96900	48	502800	Regent	205	Okara Ward	2	Whangarei District	01	Northland Region	2.63054e+06	6.60885e+06	1	96900	7	1020	17	2
97100	111	502800	Regent	205	Okara Ward	2	Whangarei District	01	Northland Region	2.63051e+06	6.60851e+06	1	97100	7	1013	39	2
96800	60	502800	Regent	205	Okara Ward	2	Whangarei District	01	Northland Region	2.63074e+06	6.60889e+06	1	96800	7	1020	21	2
97000	213	502800	Regent	205	Okara Ward	2	Whangarei District	01	Northland Region	2.63055e+06	6.60868e+06	1	97000	9	1094	96	3
96300	21	502800	Regent	205	Okara Ward	2	Whangarei District	01	Northland Region	2.63015e+06	6.60818e+06	1	96300	6	979	7	2
96500	108	502800	Regent	205	Okara Ward	2	Whangarei District	01	Northland Region	2.63041e+06	6.60901e+06	1	96500	6	988	38	2
2459100	138	586802	Oxford	5901	Oxford-Eyre Ward	59	Waimakariri District	13	Canterbury Region	2.44349e+06	5.76707e+06	1	2459100	7	1000	48	2
624800	183	519300	One Tree Hill Central	706	Tamaki-Maungakiekie Ward	7	Auckland City	02	Auckland Region	2.66893e+06	6.47563e+06	1	624800	3	923	60	1
100200	9	503100	Whangarei Central	205	Okara Ward	2	Whangarei District	01	Northland Region	2.63001e+06	6.60756e+06	1	100200	9	1081	4	3
623400	36	519300	One Tree Hill Central	704	Hobson Ward	7	Auckland City	02	Auckland Region	2.66992e+06	6.47599e+06	1	623400	2	909	12	1
362100	75	509701	Ocean View	503	Harbour Ward	5	North Shore City	02	Auckland Region	2.66569e+06	6.48773e+06	1	362100	5	968	26	2
362000	210	509701	Ocean View	503	Harbour Ward	5	North Shore City	02	Auckland Region	2.66593e+06	6.48782e+06	1	362000	6	992	74	2
2459000	57	586802	Oxford	5901	Oxford-Eyre Ward	59	Waimakariri District	13	Canterbury Region	2.44256e+06	5.76724e+06	1	2459000	5	960	20	2
624700	228	519300	One Tree Hill Central	706	Tamaki-Maungakiekie Ward	7	Auckland City	02	Auckland Region	2.66869e+06	6.47549e+06	1	624700	8	1042	103	3
99901	54	503100	Whangarei Central	205	Okara Ward	2	Whangarei District	01	Northland Region	2.63059e+06	6.60734e+06	1	99901	10	1167	24	3
362502	66	509701	Ocean View	503	Harbour Ward	5	North Shore City	02	Auckland Region	2.6659e+06	6.48756e+06	1	362502	9	1126	30	3
99600	54	503100	Whangarei Central	205	Okara Ward	2	Whangarei District	01	Northland Region	2.63031e+06	6.60793e+06	1	99600	9	1081	24	3
362400	135	509701	Ocean View	503	Harbour Ward	5	North Shore City	02	Auckland Region	2.66574e+06	6.48745e+06	1	362400	8	1043	61	3
490701	3	516001	Mt Hobson	704	Hobson Ward	7	Auckland City	02	Auckland Region	2.66887e+06	6.47946e+06	1	490701	7	1016	1	2
98200	81	503000	Vinetown	205	Okara Ward	2	Whangarei District	01	Northland Region	2.62961e+06	6.60755e+06	1	98200	8	1070	36	3
491301	60	516001	Mt Hobson	704	Hobson Ward	7	Auckland City	02	Auckland Region	2.6693e+06	6.4787e+06	1	491301	6	990	21	2
490702	162	516001	Mt Hobson	704	Hobson Ward	7	Auckland City	02	Auckland Region	2.66922e+06	6.47937e+06	1	490702	7	1016	57	2
97400	183	502800	Regent	205	Okara Ward	2	Whangarei District	01	Northland Region	2.63042e+06	6.60817e+06	1	97400	8	1046	82	3
98900	81	503000	Vinetown	205	Okara Ward	2	Whangarei District	01	Northland Region	2.62945e+06	6.60706e+06	1	98900	10	1190	36	3
2326100	162	582401	Britannia	5299	Area Outside Ward	52	Nelson City	17	Nelson Region	2.53188e+06	5.99255e+06	1	2326100	1	888	53	1
98600	105	503000	Vinetown	205	Okara Ward	2	Whangarei District	01	Northland Region	2.62934e+06	6.60726e+06	1	98600	9	1074	47	3
98400	99	503000	Vinetown	205	Okara Ward	2	Whangarei District	01	Northland Region	2.62929e+06	6.6074e+06	1	98400	9	1074	45	3
2196000	126	576100	Melrose	4704	Eastern Ward	47	Wellington City	09	Wellington Region	2.65964e+06	5.98573e+06	1	2196000	3	928	42	1
2458200	171	586802	Oxford	5901	Oxford-Eyre Ward	59	Waimakariri District	13	Canterbury Region	2.44418e+06	5.76717e+06	1	2458200	6	996	60	2
98300	111	503000	Vinetown	205	Okara Ward	2	Whangarei District	01	Northland Region	2.6297e+06	6.60748e+06	1	98300	10	1336	50	3
100800	3	503100	Whangarei Central	205	Okara Ward	2	Whangarei District	01	Northland Region	2.62977e+06	6.60742e+06	1	100800	9	1081	1	3
363400	156	508620	Sunnybrae	503	Harbour Ward	5	North Shore City	02	Auckland Region	2.66613e+06	6.48839e+06	1	363400	7	1029	55	2
2092200	66	574302	Te Kainga	4702	Onslow-Western Ward	47	Wellington City	09	Wellington Region	2.6595e+06	5.99342e+06	1	2092200	1	885	22	1
2460200	129	586802	Oxford	5901	Oxford-Eyre Ward	59	Waimakariri District	13	Canterbury Region	2.44372e+06	5.76735e+06	1	2460200	6	975	45	2
363002	90	509701	Ocean View	503	Harbour Ward	5	North Shore City	02	Auckland Region	2.6653e+06	6.48768e+06	1	363002	4	937	31	2
363100	213	509701	Ocean View	503	Harbour Ward	5	North Shore City	02	Auckland Region	2.66551e+06	6.48778e+06	1	363100	4	937	75	2
366501	90	509702	Tuff Crater	503	Harbour Ward	5	North Shore City	02	Auckland Region	2.66687e+06	6.48683e+06	1	366501	6	984	31	2
363302	63	509701	Ocean View	503	Harbour Ward	5	North Shore City	02	Auckland Region	2.66601e+06	6.48853e+06	1	363302	3	929	21	1
2441801	153	585802	Amberley	5804	Amberley Ward	58	Hurunui District	13	Canterbury Region	2.48819e+06	5.78365e+06	1	2441801	7	1003	54	2
2157701	36	573200	Aro Street-Nairn Street	4703	Lambton Ward	47	Wellington City	09	Wellington Region	2.65804e+06	5.98872e+06	1	2157701	8	1059	16	3
100700	3	503100	Whangarei Central	205	Okara Ward	2	Whangarei District	01	Northland Region	2.62998e+06	6.60737e+06	1	100700	9	1081	1	3
364300	198	509702	Tuff Crater	503	Harbour Ward	5	North Shore City	02	Auckland Region	2.66632e+06	6.48804e+06	1	364300	10	1241	89	3
363901	72	509701	Ocean View	503	Harbour Ward	5	North Shore City	02	Auckland Region	2.66568e+06	6.48817e+06	1	363901	5	966	25	2
3116200	99	610800	Gladstone-Avenal	7599	Area Outside Ward	75	Invercargill City	15	Southland Region	2.15194e+06	5.41328e+06	1	3116200	5	973	35	2
363502	150	509701	Ocean View	503	Harbour Ward	5	North Shore City	02	Auckland Region	2.66601e+06	6.48831e+06	1	363502	7	1004	52	2
364100	156	509702	Tuff Crater	503	Harbour Ward	5	North Shore City	02	Auckland Region	2.66628e+06	6.48817e+06	1	364100	10	1143	70	3
363301	81	509701	Ocean View	503	Harbour Ward	5	North Shore City	02	Auckland Region	2.66586e+06	6.48868e+06	1	363301	3	929	27	1
363003	45	509701	Ocean View	503	Harbour Ward	5	North Shore City	02	Auckland Region	2.6654e+06	6.48759e+06	1	363003	4	937	16	2
99000	123	503000	Vinetown	205	Okara Ward	2	Whangarei District	01	Northland Region	2.62951e+06	6.60693e+06	1	99000	9	1123	55	3
100300	12	503100	Whangarei Central	205	Okara Ward	2	Whangarei District	01	Northland Region	2.63015e+06	6.60745e+06	1	100300	9	1081	5	3
99700	21	503100	Whangarei Central	205	Okara Ward	2	Whangarei District	01	Northland Region	2.63014e+06	6.60767e+06	1	99700	9	1081	9	3
361900	144	509701	Ocean View	503	Harbour Ward	5	North Shore City	02	Auckland Region	2.66605e+06	6.48804e+06	1	361900	7	1017	50	2
362200	174	509701	Ocean View	503	Harbour Ward	5	North Shore City	02	Auckland Region	2.66554e+06	6.48754e+06	1	362200	5	968	61	2
99300	3	503100	Whangarei Central	205	Okara Ward	2	Whangarei District	01	Northland Region	2.63004e+06	6.60773e+06	1	99300	9	1081	1	3
100500	3	503100	Whangarei Central	205	Okara Ward	2	Whangarei District	01	Northland Region	2.63024e+06	6.60726e+06	1	100500	9	1081	1	3
624900	84	519300	One Tree Hill Central	704	Hobson Ward	7	Auckland City	02	Auckland Region	2.66956e+06	6.47568e+06	1	624900	5	954	29	2
99800	9	503100	Whangarei Central	205	Okara Ward	2	Whangarei District	01	Northland Region	2.63023e+06	6.60761e+06	1	99800	9	1081	4	3
362600	213	509701	Ocean View	503	Harbour Ward	5	North Shore City	02	Auckland Region	2.66604e+06	6.48773e+06	1	362600	9	1115	96	3
100000	21	503100	Whangarei Central	205	Okara Ward	2	Whangarei District	01	Northland Region	2.62981e+06	6.60779e+06	1	100000	9	1081	9	3
362501	102	509701	Ocean View	503	Harbour Ward	5	North Shore City	02	Auckland Region	2.66592e+06	6.48739e+06	1	362501	9	1126	46	3
2458301	87	586802	Oxford	5901	Oxford-Eyre Ward	59	Waimakariri District	13	Canterbury Region	2.44441e+06	5.76724e+06	1	2458301	6	977	30	2
2458303	135	586802	Oxford	5901	Oxford-Eyre Ward	59	Waimakariri District	13	Canterbury Region	2.44469e+06	5.76731e+06	1	2458303	4	943	47	2
362300	156	509701	Ocean View	503	Harbour Ward	5	North Shore City	02	Auckland Region	2.66579e+06	6.48769e+06	1	362300	6	982	55	2
365800	204	509702	Tuff Crater	503	Harbour Ward	5	North Shore City	02	Auckland Region	2.66637e+06	6.48725e+06	1	365800	5	966	71	2
103400	99	502900	Woodhill	205	Okara Ward	2	Whangarei District	01	Northland Region	2.62935e+06	6.60679e+06	1	103400	9	1086	45	3
2200100	123	575700	Vogeltown	4705	Southern Ward	47	Wellington City	09	Wellington Region	2.65805e+06	5.98697e+06	1	2200100	4	937	43	2
103900	9	503600	Morningside	205	Okara Ward	2	Whangarei District	01	Northland Region	2.6298e+06	6.60709e+06	1	103900	9	1081	4	3
366202	30	509702	Tuff Crater	503	Harbour Ward	5	North Shore City	02	Auckland Region	2.66613e+06	6.48692e+06	1	366202	6	982	10	2
365000	18	509702	Tuff Crater	503	Harbour Ward	5	North Shore City	02	Auckland Region	2.66625e+06	6.48749e+06	1	365000	10	1285	8	3
3117700	99	610800	Gladstone-Avenal	7599	Area Outside Ward	75	Invercargill City	15	Southland Region	2.1519e+06	5.41366e+06	1	3117700	8	1039	45	3
3118600	93	610800	Gladstone-Avenal	7599	Area Outside Ward	75	Invercargill City	15	Southland Region	2.1524e+06	5.41366e+06	1	3118600	3	918	31	1
3118800	78	610800	Gladstone-Avenal	7599	Area Outside Ward	75	Invercargill City	15	Southland Region	2.15283e+06	5.41367e+06	1	3118800	1	895	26	1
3118700	108	610800	Gladstone-Avenal	7599	Area Outside Ward	75	Invercargill City	15	Southland Region	2.1526e+06	5.41366e+06	1	3118700	3	918	36	1
3118900	48	610800	Gladstone-Avenal	7599	Area Outside Ward	75	Invercargill City	15	Southland Region	2.15298e+06	5.41368e+06	1	3118900	1	895	16	1
3117800	108	610800	Gladstone-Avenal	7599	Area Outside Ward	75	Invercargill City	15	Southland Region	2.15218e+06	5.41364e+06	1	3117800	2	910	36	1
103100	153	502900	Woodhill	205	Okara Ward	2	Whangarei District	01	Northland Region	2.62868e+06	6.60661e+06	1	103100	9	1133	69	3
104000	54	503600	Morningside	205	Okara Ward	2	Whangarei District	01	Northland Region	2.62969e+06	6.60679e+06	1	104000	10	1167	24	3
103000	75	502900	Woodhill	205	Okara Ward	2	Whangarei District	01	Northland Region	2.62917e+06	6.60716e+06	1	103000	9	1093	34	3
366300	180	509702	Tuff Crater	503	Harbour Ward	5	North Shore City	02	Auckland Region	2.66642e+06	6.48699e+06	1	366300	2	916	59	1
3118000	81	610800	Gladstone-Avenal	7599	Area Outside Ward	75	Invercargill City	15	Southland Region	2.15223e+06	5.4135e+06	1	3118000	3	928	27	1
3119000	36	610800	Gladstone-Avenal	7599	Area Outside Ward	75	Invercargill City	15	Southland Region	2.15245e+06	5.41352e+06	1	3119000	2	913	12	1
3117900	117	610800	Gladstone-Avenal	7599	Area Outside Ward	75	Invercargill City	15	Southland Region	2.15194e+06	5.41354e+06	1	3117900	3	928	39	1
102901	48	502900	Woodhill	205	Okara Ward	2	Whangarei District	01	Northland Region	2.62897e+06	6.60712e+06	1	102901	5	972	17	2
366100	123	509702	Tuff Crater	503	Harbour Ward	5	North Shore City	02	Auckland Region	2.66613e+06	6.4871e+06	1	366100	6	984	43	2
365700	78	509702	Tuff Crater	503	Harbour Ward	5	North Shore City	02	Auckland Region	2.66611e+06	6.48736e+06	1	365700	5	968	27	2
103600	126	502900	Woodhill	205	Okara Ward	2	Whangarei District	01	Northland Region	2.62907e+06	6.60663e+06	1	103600	10	1179	57	3
102902	45	502900	Woodhill	205	Okara Ward	2	Whangarei District	01	Northland Region	2.62901e+06	6.60698e+06	1	102902	5	972	16	2
364402	69	509702	Tuff Crater	503	Harbour Ward	5	North Shore City	02	Auckland Region	2.66672e+06	6.48781e+06	1	364402	10	1338	31	3
2460101	24	586802	Oxford	5901	Oxford-Eyre Ward	59	Waimakariri District	13	Canterbury Region	2.44271e+06	5.76734e+06	1	2460101	6	975	8	2
363001	150	509701	Ocean View	503	Harbour Ward	5	North Shore City	02	Auckland Region	2.6653e+06	6.48783e+06	1	363001	4	938	52	2
363902	270	509701	Ocean View	503	Harbour Ward	5	North Shore City	02	Auckland Region	2.66582e+06	6.48818e+06	1	363902	5	966	94	2
364200	114	509702	Tuff Crater	503	Harbour Ward	5	North Shore City	02	Auckland Region	2.6662e+06	6.48803e+06	1	364200	10	1256	51	3
364602	174	509702	Tuff Crater	503	Harbour Ward	5	North Shore City	02	Auckland Region	2.66698e+06	6.48805e+06	1	364602	7	1011	61	2
364500	261	509702	Tuff Crater	503	Harbour Ward	5	North Shore City	02	Auckland Region	2.66691e+06	6.48818e+06	1	364500	5	974	91	2
3116300	81	610800	Gladstone-Avenal	7599	Area Outside Ward	75	Invercargill City	15	Southland Region	2.1522e+06	5.41337e+06	1	3116300	3	932	27	1
363200	135	509701	Ocean View	503	Harbour Ward	5	North Shore City	02	Auckland Region	2.66562e+06	6.48794e+06	1	363200	4	940	47	2
364002	69	509701	Ocean View	503	Harbour Ward	5	North Shore City	02	Auckland Region	2.66558e+06	6.48807e+06	1	364002	6	983	24	2
364401	108	509702	Tuff Crater	503	Harbour Ward	5	North Shore City	02	Auckland Region	2.66656e+06	6.4879e+06	1	364401	10	1338	49	3
101700	6	503100	Whangarei Central	205	Okara Ward	2	Whangarei District	01	Northland Region	2.6306e+06	6.60697e+06	1	101700	6	993	2	2
367700	291	514700	Blockhouse Bay	702	Avondale-Roskill Ward	7	Auckland City	02	Auckland Region	2.66142e+06	6.47321e+06	1	367700	5	970	102	2
2333400	192	583000	Tahunanui	5299	Area Outside Ward	52	Nelson City	17	Nelson Region	2.53048e+06	5.99139e+06	1	2333400	7	1012	67	2
367900	168	514700	Blockhouse Bay	702	Avondale-Roskill Ward	7	Auckland City	02	Auckland Region	2.66131e+06	6.47398e+06	1	367900	2	911	55	1
367600	66	514700	Blockhouse Bay	702	Avondale-Roskill Ward	7	Auckland City	02	Auckland Region	2.66124e+06	6.47325e+06	1	367600	4	938	23	2
2333300	63	583000	Tahunanui	5299	Area Outside Ward	52	Nelson City	17	Nelson Region	2.53018e+06	5.9913e+06	1	2333300	7	1002	22	2
367000	171	509701	Ocean View	503	Harbour Ward	5	North Shore City	02	Auckland Region	2.66583e+06	6.48725e+06	1	367000	5	966	60	2
1416400	72	546100	Westshore	3199	Area Outside Ward	31	Napier City	06	Hawke's Bay Region	2.84358e+06	6.18532e+06	1	1416400	6	997	25	2
367200	156	514700	Blockhouse Bay	702	Avondale-Roskill Ward	7	Auckland City	02	Auckland Region	2.66118e+06	6.47388e+06	1	367200	5	970	55	2
367300	75	514700	Blockhouse Bay	702	Avondale-Roskill Ward	7	Auckland City	02	Auckland Region	2.6613e+06	6.47348e+06	1	367300	4	946	26	2
1416500	135	546100	Westshore	3199	Area Outside Ward	31	Napier City	06	Hawke's Bay Region	2.84367e+06	6.18508e+06	1	1416500	7	1000	47	2
3119100	42	610800	Gladstone-Avenal	7599	Area Outside Ward	75	Invercargill City	15	Southland Region	2.15248e+06	5.41347e+06	1	3119100	2	913	14	1
366800	99	509702	Tuff Crater	503	Harbour Ward	5	North Shore City	02	Auckland Region	2.66702e+06	6.48695e+06	1	366800	4	936	35	2
2333900	240	583000	Tahunanui	5299	Area Outside Ward	52	Nelson City	17	Nelson Region	2.53053e+06	5.99068e+06	1	2333900	9	1134	108	3
2333600	198	583000	Tahunanui	5299	Area Outside Ward	52	Nelson City	17	Nelson Region	2.53038e+06	5.99108e+06	1	2333600	8	1043	89	3
2333200	150	583000	Tahunanui	5299	Area Outside Ward	52	Nelson City	17	Nelson Region	2.52987e+06	5.99116e+06	1	2333200	9	1134	68	3
368000	120	514700	Blockhouse Bay	702	Avondale-Roskill Ward	7	Auckland City	02	Auckland Region	2.66169e+06	6.47401e+06	1	368000	3	925	40	1
105800	66	503300	Horahora	205	Okara Ward	2	Whangarei District	01	Northland Region	2.6284e+06	6.6065e+06	1	105800	6	974	23	2
2333800	132	583000	Tahunanui	5299	Area Outside Ward	52	Nelson City	17	Nelson Region	2.53058e+06	5.99098e+06	1	2333800	7	1011	46	2
2333100	105	583000	Tahunanui	5299	Area Outside Ward	52	Nelson City	17	Nelson Region	2.53076e+06	5.99151e+06	1	2333100	7	1017	37	2
103200	54	502900	Woodhill	205	Okara Ward	2	Whangarei District	01	Northland Region	2.62902e+06	6.60673e+06	1	103200	8	1043	24	3
3118300	78	610800	Gladstone-Avenal	7599	Area Outside Ward	75	Invercargill City	15	Southland Region	2.15259e+06	5.41382e+06	1	3118300	5	953	27	2
3118400	117	610800	Gladstone-Avenal	7599	Area Outside Ward	75	Invercargill City	15	Southland Region	2.15281e+06	5.41384e+06	1	3118400	1	871	39	1
3118500	102	610800	Gladstone-Avenal	7599	Area Outside Ward	75	Invercargill City	15	Southland Region	2.15304e+06	5.41385e+06	1	3118500	1	873	34	1
364900	147	509702	Tuff Crater	503	Harbour Ward	5	North Shore City	02	Auckland Region	2.66617e+06	6.48783e+06	1	364900	10	1285	66	3
1413802	6	545611	Bay View	3199	Area Outside Ward	31	Napier City	06	Hawke's Bay Region	2.84344e+06	6.18548e+06	1	1413802	7	1029	2	2
3117400	102	610800	Gladstone-Avenal	7599	Area Outside Ward	75	Invercargill City	15	Southland Region	2.15189e+06	5.41378e+06	1	3117400	5	969	36	2
3117600	78	610800	Gladstone-Avenal	7599	Area Outside Ward	75	Invercargill City	15	Southland Region	2.15218e+06	5.41381e+06	1	3117600	2	910	26	1
3118200	78	610800	Gladstone-Avenal	7599	Area Outside Ward	75	Invercargill City	15	Southland Region	2.1524e+06	5.4138e+06	1	3118200	5	953	27	2
365500	177	509702	Tuff Crater	503	Harbour Ward	5	North Shore City	02	Auckland Region	2.66646e+06	6.4874e+06	1	365500	5	968	62	2
366201	186	509702	Tuff Crater	503	Harbour Ward	5	North Shore City	02	Auckland Region	2.66627e+06	6.48706e+06	1	366201	6	982	65	2
2200500	69	575700	Vogeltown	4705	Southern Ward	47	Wellington City	09	Wellington Region	2.6583e+06	5.98686e+06	1	2200500	2	902	23	1
2200400	84	575700	Vogeltown	4705	Southern Ward	47	Wellington City	09	Wellington Region	2.6582e+06	5.98685e+06	1	2200400	2	902	28	1
366901	282	509701	Ocean View	503	Harbour Ward	5	North Shore City	02	Auckland Region	2.66553e+06	6.48732e+06	1	366901	4	946	99	2
104200	57	503600	Morningside	205	Okara Ward	2	Whangarei District	01	Northland Region	2.62937e+06	6.60648e+06	1	104200	10	1172	26	3
103500	99	502900	Woodhill	205	Okara Ward	2	Whangarei District	01	Northland Region	2.62922e+06	6.60664e+06	1	103500	8	1031	45	3
103800	102	502900	Woodhill	205	Okara Ward	2	Whangarei District	01	Northland Region	2.62885e+06	6.60645e+06	1	103800	9	1113	46	3
102702	210	502900	Woodhill	205	Okara Ward	2	Whangarei District	01	Northland Region	2.62877e+06	6.60695e+06	1	102702	6	983	74	2
1413702	45	545611	Bay View	3199	Area Outside Ward	31	Napier City	06	Hawke's Bay Region	2.84354e+06	6.18491e+06	1	1413702	8	1046	20	3
366402	18	509702	Tuff Crater	503	Harbour Ward	5	North Shore City	02	Auckland Region	2.66667e+06	6.487e+06	1	366402	2	904	6	1
365900	78	509702	Tuff Crater	503	Harbour Ward	5	North Shore City	02	Auckland Region	2.66657e+06	6.48722e+06	1	365900	4	936	27	2
3118100	117	610800	Gladstone-Avenal	7599	Area Outside Ward	75	Invercargill City	15	Southland Region	2.15194e+06	5.41341e+06	1	3118100	3	927	39	1
103700	117	502900	Woodhill	205	Okara Ward	2	Whangarei District	01	Northland Region	2.62914e+06	6.60642e+06	1	103700	9	1113	53	3
103300	24	502900	Woodhill	205	Okara Ward	2	Whangarei District	01	Northland Region	2.62925e+06	6.60689e+06	1	103300	9	1093	11	3
1417000	126	546100	Westshore	3199	Area Outside Ward	31	Napier City	06	Hawke's Bay Region	2.84468e+06	6.18424e+06	1	1417000	7	1004	44	2
369502	75	514700	Blockhouse Bay	702	Avondale-Roskill Ward	7	Auckland City	02	Auckland Region	2.66128e+06	6.47419e+06	1	369502	5	955	26	2
2727900	39	597820	Ashburton Central West	6303	Ashburton Ward	63	Ashburton District	13	Canterbury Region	2.40948e+06	5.70011e+06	1	2727900	3	928	13	1
2729100	75	597850	Hampstead	6303	Ashburton Ward	63	Ashburton District	13	Canterbury Region	2.40944e+06	5.69848e+06	1	2729100	8	1056	34	3
2727800	69	597820	Ashburton Central West	6303	Ashburton Ward	63	Ashburton District	13	Canterbury Region	2.40934e+06	5.70005e+06	1	2727800	3	925	23	1
369600	144	514700	Blockhouse Bay	702	Avondale-Roskill Ward	7	Auckland City	02	Auckland Region	2.6614e+06	6.47435e+06	1	369600	4	951	50	2
368900	171	514700	Blockhouse Bay	702	Avondale-Roskill Ward	7	Auckland City	02	Auckland Region	2.66221e+06	6.47405e+06	1	368900	4	950	60	2
2334200	159	583000	Tahunanui	5299	Area Outside Ward	52	Nelson City	17	Nelson Region	2.52994e+06	5.99105e+06	1	2334200	8	1049	72	3
2335702	126	583500	Nelson Airport	5299	Area Outside Ward	52	Nelson City	17	Nelson Region	2.52968e+06	5.99104e+06	1	2335702	6	997	44	2
368602	90	514700	Blockhouse Bay	702	Avondale-Roskill Ward	7	Auckland City	02	Auckland Region	2.66147e+06	6.4739e+06	1	368602	1	895	30	1
369501	90	514700	Blockhouse Bay	702	Avondale-Roskill Ward	7	Auckland City	02	Auckland Region	2.66126e+06	6.47434e+06	1	369501	5	955	31	2
368400	180	514700	Blockhouse Bay	702	Avondale-Roskill Ward	7	Auckland City	02	Auckland Region	2.66187e+06	6.4736e+06	1	368400	3	933	59	1
2335200	93	583100	Tahuna Hills	5299	Area Outside Ward	52	Nelson City	17	Nelson Region	2.53095e+06	5.99087e+06	1	2335200	3	924	31	1
2334500	156	583100	Tahuna Hills	5299	Area Outside Ward	52	Nelson City	17	Nelson Region	2.53093e+06	5.99161e+06	1	2334500	8	1045	70	3
369800	141	514700	Blockhouse Bay	702	Avondale-Roskill Ward	7	Auckland City	02	Auckland Region	2.66147e+06	6.47416e+06	1	369800	4	948	49	2
892800	27	530200	Hamilton East	1603	South Ward	16	Hamilton City	03	Waikato Region	2.71219e+06	6.37659e+06	1	892800	9	1092	12	3
369102	129	514700	Blockhouse Bay	702	Avondale-Roskill Ward	7	Auckland City	02	Auckland Region	2.66266e+06	6.47379e+06	1	369102	3	929	43	1
2728200	30	597840	Ashburton Central East	6303	Ashburton Ward	63	Ashburton District	13	Canterbury Region	2.40918e+06	5.69919e+06	1	2728200	9	1125	14	3
2728300	84	597840	Ashburton Central East	6303	Ashburton Ward	63	Ashburton District	13	Canterbury Region	2.40947e+06	5.69916e+06	1	2728300	2	915	28	1
2335900	174	583500	Nelson Airport	5299	Area Outside Ward	52	Nelson City	17	Nelson Region	2.52987e+06	5.99076e+06	1	2335900	7	1017	61	2
2335703	120	583500	Nelson Airport	5299	Area Outside Ward	52	Nelson City	17	Nelson Region	2.52973e+06	5.99076e+06	1	2335703	7	1002	42	2
368200	147	514700	Blockhouse Bay	702	Avondale-Roskill Ward	7	Auckland City	02	Auckland Region	2.66168e+06	6.47382e+06	1	368200	5	958	51	2
2728600	81	597840	Ashburton Central East	6303	Ashburton Ward	63	Ashburton District	13	Canterbury Region	2.40956e+06	5.69892e+06	1	2728600	2	915	27	1
762800	252	525201	Clevedon	807	Botany-Clevedon Ward	8	Manukau City	02	Auckland Region	2.69181e+06	6.4662e+06	1	762800	2	908	83	1
105900	102	503300	Horahora	205	Okara Ward	2	Whangarei District	01	Northland Region	2.6281e+06	6.6065e+06	1	105900	6	988	36	2
369101	126	514700	Blockhouse Bay	702	Avondale-Roskill Ward	7	Auckland City	02	Auckland Region	2.6627e+06	6.47401e+06	1	369101	1	890	42	1
368300	135	514700	Blockhouse Bay	702	Avondale-Roskill Ward	7	Auckland City	02	Auckland Region	2.6619e+06	6.47391e+06	1	368300	4	950	47	2
1416900	126	546100	Westshore	3199	Area Outside Ward	31	Napier City	06	Hawke's Bay Region	2.84431e+06	6.18429e+06	1	1416900	4	939	44	2
763000	105	525201	Clevedon	807	Botany-Clevedon Ward	8	Manukau City	02	Auckland Region	2.69164e+06	6.46509e+06	1	763000	2	914	35	1
368700	81	514700	Blockhouse Bay	702	Avondale-Roskill Ward	7	Auckland City	02	Auckland Region	2.66216e+06	6.47414e+06	1	368700	6	995	28	2
2335000	84	583100	Tahuna Hills	5299	Area Outside Ward	52	Nelson City	17	Nelson Region	2.53082e+06	5.99102e+06	1	2335000	3	932	28	1
369300	78	514700	Blockhouse Bay	702	Avondale-Roskill Ward	7	Auckland City	02	Auckland Region	2.66296e+06	6.47392e+06	1	369300	4	935	27	2
2334600	159	583100	Tahuna Hills	5299	Area Outside Ward	52	Nelson City	17	Nelson Region	2.53116e+06	5.99162e+06	1	2334600	2	915	52	1
369702	90	514700	Blockhouse Bay	702	Avondale-Roskill Ward	7	Auckland City	02	Auckland Region	2.66158e+06	6.47425e+06	1	369702	4	944	31	2
368601	51	514700	Blockhouse Bay	702	Avondale-Roskill Ward	7	Auckland City	02	Auckland Region	2.66145e+06	6.47404e+06	1	368601	1	895	17	1
368500	90	514700	Blockhouse Bay	702	Avondale-Roskill Ward	7	Auckland City	02	Auckland Region	2.66204e+06	6.47365e+06	1	368500	4	936	31	2
105700	99	503300	Horahora	205	Okara Ward	2	Whangarei District	01	Northland Region	2.6283e+06	6.60662e+06	1	105700	10	1156	45	3
366902	129	509701	Ocean View	503	Harbour Ward	5	North Shore City	02	Auckland Region	2.66567e+06	6.48718e+06	1	366902	1	899	43	1
367400	183	514700	Blockhouse Bay	702	Avondale-Roskill Ward	7	Auckland City	02	Auckland Region	2.66145e+06	6.47359e+06	1	367400	5	962	64	2
367500	195	514700	Blockhouse Bay	702	Avondale-Roskill Ward	7	Auckland City	02	Auckland Region	2.6616e+06	6.47344e+06	1	367500	3	919	64	1
104400	150	503600	Morningside	205	Okara Ward	2	Whangarei District	01	Northland Region	2.6294e+06	6.60632e+06	1	104400	10	1172	68	3
367800	129	514700	Blockhouse Bay	702	Avondale-Roskill Ward	7	Auckland City	02	Auckland Region	2.6617e+06	6.47322e+06	1	367800	4	938	45	2
2333700	102	583000	Tahunanui	5299	Area Outside Ward	52	Nelson City	17	Nelson Region	2.53065e+06	5.99125e+06	1	2333700	7	1016	36	2
2333500	135	583000	Tahunanui	5299	Area Outside Ward	52	Nelson City	17	Nelson Region	2.53024e+06	5.99118e+06	1	2333500	7	1002	47	2
3119200	6	610800	Gladstone-Avenal	7599	Area Outside Ward	75	Invercargill City	15	Southland Region	2.15298e+06	5.41356e+06	1	3119200	2	913	2	1
367100	210	509701	Ocean View	503	Harbour Ward	5	North Shore City	02	Auckland Region	2.66595e+06	6.48713e+06	1	367100	3	921	69	1
895000	6	530200	Hamilton East	1603	South Ward	16	Hamilton City	03	Waikato Region	2.71202e+06	6.37648e+06	1	895000	8	1056	3	3
894900	27	530200	Hamilton East	1603	South Ward	16	Hamilton City	03	Waikato Region	2.712e+06	6.37676e+06	1	894900	8	1056	12	3
3123600	156	610700	Rosedale	7599	Area Outside Ward	75	Invercargill City	15	Southland Region	2.15365e+06	5.41395e+06	1	3123600	1	885	51	1
3123700	159	610700	Rosedale	7599	Area Outside Ward	75	Invercargill City	15	Southland Region	2.15398e+06	5.41397e+06	1	3123700	1	897	52	1
3122500	60	610700	Rosedale	7599	Area Outside Ward	75	Invercargill City	15	Southland Region	2.15432e+06	5.41399e+06	1	3122500	3	923	20	1
3122800	114	610700	Rosedale	7599	Area Outside Ward	75	Invercargill City	15	Southland Region	2.15487e+06	5.41397e+06	1	3122800	4	947	40	2
3123500	129	610700	Rosedale	7599	Area Outside Ward	75	Invercargill City	15	Southland Region	2.15332e+06	5.41393e+06	1	3123500	4	938	45	2
894700	66	530200	Hamilton East	1603	South Ward	16	Hamilton City	03	Waikato Region	2.7118e+06	6.37697e+06	1	894700	8	1056	30	3
2729300	6	597840	Ashburton Central East	6303	Ashburton Ward	63	Ashburton District	13	Canterbury Region	2.4098e+06	5.69979e+06	1	2729300	6	976	2	2
370100	126	514700	Blockhouse Bay	702	Avondale-Roskill Ward	7	Auckland City	02	Auckland Region	2.66207e+06	6.47431e+06	1	370100	3	929	42	1
2792600	3	599500	Seaview	6404	Timaru Ward	64	Timaru District	13	Canterbury Region	2.37053e+06	5.64454e+06	1	2792600	8	1061	1	3
894800	24	530200	Hamilton East	1603	South Ward	16	Hamilton City	03	Waikato Region	2.7119e+06	6.37678e+06	1	894800	8	1056	11	3
763100	63	525201	Clevedon	807	Botany-Clevedon Ward	8	Manukau City	02	Auckland Region	2.69171e+06	6.46552e+06	1	763100	2	908	21	1
371501	30	514600	Avondale South	702	Avondale-Roskill Ward	7	Auckland City	02	Auckland Region	2.66194e+06	6.47465e+06	1	371501	5	965	10	2
371502	186	514600	Avondale South	702	Avondale-Roskill Ward	7	Auckland City	02	Auckland Region	2.66193e+06	6.47456e+06	1	371502	5	965	65	2
2730400	60	597840	Ashburton Central East	6303	Ashburton Ward	63	Ashburton District	13	Canterbury Region	2.40967e+06	5.69903e+06	1	2730400	7	1001	21	2
108400	183	503500	Raumanga East	205	Okara Ward	2	Whangarei District	01	Northland Region	2.62883e+06	6.60558e+06	1	108400	9	1105	82	3
371400	96	514600	Avondale South	702	Avondale-Roskill Ward	7	Auckland City	02	Auckland Region	2.66179e+06	6.47476e+06	1	371400	4	937	34	2
370000	129	514700	Blockhouse Bay	702	Avondale-Roskill Ward	7	Auckland City	02	Auckland Region	2.66195e+06	6.47438e+06	1	370000	7	1007	45	2
894500	120	530100	Peachgrove	1603	South Ward	16	Hamilton City	03	Waikato Region	2.7117e+06	6.37722e+06	1	894500	8	1056	54	3
370700	183	514700	Blockhouse Bay	702	Avondale-Roskill Ward	7	Auckland City	02	Auckland Region	2.66271e+06	6.47428e+06	1	370700	5	972	64	2
171104	27	505805	Orewa	403	Eastern Ward	4	Rodney District	02	Auckland Region	2.66184e+06	6.51252e+06	1	171104	9	1100	12	3
3123200	159	610700	Rosedale	7599	Area Outside Ward	75	Invercargill City	15	Southland Region	2.15484e+06	5.41385e+06	1	3123200	3	928	52	1
3123400	30	610700	Rosedale	7599	Area Outside Ward	75	Invercargill City	15	Southland Region	2.15515e+06	5.41386e+06	1	3123400	2	911	10	1
3123100	66	610700	Rosedale	7599	Area Outside Ward	75	Invercargill City	15	Southland Region	2.15457e+06	5.41381e+06	1	3123100	3	927	22	1
2728000	60	597820	Ashburton Central West	6303	Ashburton Ward	63	Ashburton District	13	Canterbury Region	2.40947e+06	5.69991e+06	1	2728000	3	925	20	1
2334100	99	583000	Tahunanui	5299	Area Outside Ward	52	Nelson City	17	Nelson Region	2.53007e+06	5.99096e+06	1	2334100	7	1016	35	2
2334800	108	583100	Tahuna Hills	5299	Area Outside Ward	52	Nelson City	17	Nelson Region	2.53088e+06	5.99126e+06	1	2334800	5	968	38	2
368100	120	514700	Blockhouse Bay	702	Avondale-Roskill Ward	7	Auckland City	02	Auckland Region	2.66147e+06	6.47376e+06	1	368100	4	946	42	2
433004	156	514101	Auckland Harbourside	704	Hobson Ward	7	Auckland City	02	Auckland Region	2.66743e+06	6.48276e+06	1	433004	4	939	55	2
369200	123	514700	Blockhouse Bay	702	Avondale-Roskill Ward	7	Auckland City	02	Auckland Region	2.66286e+06	6.47398e+06	1	369200	4	935	43	2
2335301	123	583100	Tahuna Hills	5299	Area Outside Ward	52	Nelson City	17	Nelson Region	2.53098e+06	5.99069e+06	1	2335301	4	950	43	2
2335100	81	583100	Tahuna Hills	5299	Area Outside Ward	52	Nelson City	17	Nelson Region	2.53072e+06	5.99073e+06	1	2335100	3	932	27	1
2334400	102	583100	Tahuna Hills	5299	Area Outside Ward	52	Nelson City	17	Nelson Region	2.53122e+06	5.99196e+06	1	2334400	1	865	34	1
2334300	159	583100	Tahuna Hills	5299	Area Outside Ward	52	Nelson City	17	Nelson Region	2.53152e+06	5.99209e+06	1	2334300	2	903	52	1
369000	306	514700	Blockhouse Bay	702	Avondale-Roskill Ward	7	Auckland City	02	Auckland Region	2.66253e+06	6.47393e+06	1	369000	4	936	107	2
2728500	63	597840	Ashburton Central East	6303	Ashburton Ward	63	Ashburton District	13	Canterbury Region	2.40934e+06	5.69902e+06	1	2728500	9	1125	28	3
2728400	24	597840	Ashburton Central East	6303	Ashburton Ward	63	Ashburton District	13	Canterbury Region	2.40919e+06	5.69899e+06	1	2728400	9	1125	11	3
1416700	96	546100	Westshore	3199	Area Outside Ward	31	Napier City	06	Hawke's Bay Region	2.84374e+06	6.18478e+06	1	1416700	6	993	34	2
1416800	147	546100	Westshore	3199	Area Outside Ward	31	Napier City	06	Hawke's Bay Region	2.84401e+06	6.18449e+06	1	1416800	4	936	51	2
1416600	81	546100	Westshore	3199	Area Outside Ward	31	Napier City	06	Hawke's Bay Region	2.84382e+06	6.18486e+06	1	1416600	6	997	28	2
2728800	156	597850	Hampstead	6303	Ashburton Ward	63	Ashburton District	13	Canterbury Region	2.40972e+06	5.69872e+06	1	2728800	10	1176	70	3
2728900	72	597850	Hampstead	6303	Ashburton Ward	63	Ashburton District	13	Canterbury Region	2.40959e+06	5.69859e+06	1	2728900	8	1056	32	3
369701	81	514700	Blockhouse Bay	702	Avondale-Roskill Ward	7	Auckland City	02	Auckland Region	2.66161e+06	6.47441e+06	1	369701	4	944	28	2
368800	129	514700	Blockhouse Bay	702	Avondale-Roskill Ward	7	Auckland City	02	Auckland Region	2.6625e+06	6.4742e+06	1	368800	6	976	45	2
3124200	66	610700	Rosedale	7599	Area Outside Ward	75	Invercargill City	15	Southland Region	2.15419e+06	5.41398e+06	1	3124200	2	914	22	1
2732400	33	597840	Ashburton Central East	6303	Ashburton Ward	63	Ashburton District	13	Canterbury Region	2.41015e+06	5.70011e+06	1	2732400	7	1028	12	2
2732200	69	597830	Netherby	6303	Ashburton Ward	63	Ashburton District	13	Canterbury Region	2.41041e+06	5.70023e+06	1	2732200	7	1028	24	2
2732500	45	597840	Ashburton Central East	6303	Ashburton Ward	63	Ashburton District	13	Canterbury Region	2.41007e+06	5.70004e+06	1	2732500	8	1039	20	3
372900	129	514600	Avondale South	702	Avondale-Roskill Ward	7	Auckland City	02	Auckland Region	2.66212e+06	6.47479e+06	1	372900	8	1031	58	3
896200	72	530200	Hamilton East	1603	South Ward	16	Hamilton City	03	Waikato Region	2.71205e+06	6.37699e+06	1	896200	9	1091	32	3
433404	36	514102	Auckland Central West	704	Hobson Ward	7	Auckland City	02	Auckland Region	2.66756e+06	6.48224e+06	1	433404	10	1152	16	3
373500	144	514600	Avondale South	702	Avondale-Roskill Ward	7	Auckland City	02	Auckland Region	2.66307e+06	6.475e+06	1	373500	4	952	50	2
3124700	72	610900	Windsor	7599	Area Outside Ward	75	Invercargill City	15	Southland Region	2.15367e+06	5.4135e+06	1	3124700	5	969	25	2
3124800	84	610900	Windsor	7599	Area Outside Ward	75	Invercargill City	15	Southland Region	2.15402e+06	5.41352e+06	1	3124800	4	948	29	2
3124600	72	610900	Windsor	7599	Area Outside Ward	75	Invercargill City	15	Southland Region	2.15334e+06	5.41348e+06	1	3124600	4	948	25	2
372200	231	514600	Avondale South	702	Avondale-Roskill Ward	7	Auckland City	02	Auckland Region	2.6618e+06	6.47506e+06	1	372200	5	963	81	2
3125000	81	610900	Windsor	7599	Area Outside Ward	75	Invercargill City	15	Southland Region	2.15335e+06	5.41338e+06	1	3125000	8	1047	36	3
373002	93	514600	Avondale South	702	Avondale-Roskill Ward	7	Auckland City	02	Auckland Region	2.66229e+06	6.47472e+06	1	373002	3	927	31	1
372600	114	514600	Avondale South	702	Avondale-Roskill Ward	7	Auckland City	02	Auckland Region	2.66229e+06	6.47495e+06	1	372600	5	973	40	2
108700	96	503500	Raumanga East	205	Okara Ward	2	Whangarei District	01	Northland Region	2.62922e+06	6.6056e+06	1	108700	10	1173	43	3
370800	258	514700	Blockhouse Bay	702	Avondale-Roskill Ward	7	Auckland City	02	Auckland Region	2.66285e+06	6.47427e+06	1	370800	8	1071	116	3
108300	249	503500	Raumanga East	205	Okara Ward	2	Whangarei District	01	Northland Region	2.62927e+06	6.60598e+06	1	108300	10	1139	112	3
370500	123	514700	Blockhouse Bay	702	Avondale-Roskill Ward	7	Auckland City	02	Auckland Region	2.66285e+06	6.47458e+06	1	370500	6	995	43	2
3123900	99	610700	Rosedale	7599	Area Outside Ward	75	Invercargill City	15	Southland Region	2.15373e+06	5.41374e+06	1	3123900	6	992	35	2
3124100	57	610700	Rosedale	7599	Area Outside Ward	75	Invercargill City	15	Southland Region	2.15421e+06	5.41378e+06	1	3124100	2	914	19	1
3124000	156	610700	Rosedale	7599	Area Outside Ward	75	Invercargill City	15	Southland Region	2.15398e+06	5.41377e+06	1	3124000	1	889	51	1
3122900	69	610700	Rosedale	7599	Area Outside Ward	75	Invercargill City	15	Southland Region	2.15433e+06	5.4138e+06	1	3122900	3	927	23	1
3123000	60	610700	Rosedale	7599	Area Outside Ward	75	Invercargill City	15	Southland Region	2.15445e+06	5.4138e+06	1	3123000	3	927	20	1
3123800	141	610700	Rosedale	7599	Area Outside Ward	75	Invercargill City	15	Southland Region	2.15334e+06	5.41373e+06	1	3123800	1	882	47	1
3123300	87	610700	Rosedale	7599	Area Outside Ward	75	Invercargill City	15	Southland Region	2.15498e+06	5.41378e+06	1	3123300	2	911	29	1
894400	156	530100	Peachgrove	1603	South Ward	16	Hamilton City	03	Waikato Region	2.71167e+06	6.37743e+06	1	894400	9	1115	70	3
108200	123	503500	Raumanga East	205	Okara Ward	2	Whangarei District	01	Northland Region	2.62901e+06	6.60588e+06	1	108200	10	1245	55	3
2729900	3	597840	Ashburton Central East	6303	Ashburton Ward	63	Ashburton District	13	Canterbury Region	2.40943e+06	5.69951e+06	1	2729900	8	1051	1	3
2730000	138	597840	Ashburton Central East	6303	Ashburton Ward	63	Ashburton District	13	Canterbury Region	2.40969e+06	5.69935e+06	1	2730000	8	1051	62	3
108000	276	503500	Raumanga East	205	Okara Ward	2	Whangarei District	01	Northland Region	2.6288e+06	6.60603e+06	1	108000	10	1248	124	3
369900	183	514700	Blockhouse Bay	702	Avondale-Roskill Ward	7	Auckland City	02	Auckland Region	2.66183e+06	6.47419e+06	1	369900	4	946	64	2
370600	219	514700	Blockhouse Bay	702	Avondale-Roskill Ward	7	Auckland City	02	Auckland Region	2.66304e+06	6.4746e+06	1	370600	5	967	77	2
370200	144	514700	Blockhouse Bay	702	Avondale-Roskill Ward	7	Auckland City	02	Auckland Region	2.66223e+06	6.4743e+06	1	370200	5	972	50	2
370300	171	514700	Blockhouse Bay	702	Avondale-Roskill Ward	7	Auckland City	02	Auckland Region	2.66236e+06	6.4745e+06	1	370300	6	990	60	2
371600	114	514600	Avondale South	702	Avondale-Roskill Ward	7	Auckland City	02	Auckland Region	2.66197e+06	6.47477e+06	1	371600	5	966	40	2
894600	132	530100	Peachgrove	1603	South Ward	16	Hamilton City	03	Waikato Region	2.71183e+06	6.3773e+06	1	894600	8	1054	59	3
894300	285	530100	Peachgrove	1603	South Ward	16	Hamilton City	03	Waikato Region	2.71154e+06	6.37718e+06	1	894300	9	1083	128	3
3122700	153	610700	Rosedale	7599	Area Outside Ward	75	Invercargill City	15	Southland Region	2.15489e+06	5.41406e+06	1	3122700	2	917	50	1
3122600	114	610700	Rosedale	7599	Area Outside Ward	75	Invercargill City	15	Southland Region	2.15449e+06	5.41399e+06	1	3122600	3	923	38	1
2865300	168	603601	North Dunedin	7103	Cargill Ward	71	Dunedin City	14	Otago Region	2.31659e+06	5.48019e+06	1	2865300	9	1088	76	3
2159500	288	573200	Aro Street-Nairn Street	4703	Lambton Ward	47	Wellington City	09	Wellington Region	2.65819e+06	5.9884e+06	1	2159500	10	1331	130	3
2864400	171	603601	North Dunedin	7103	Cargill Ward	71	Dunedin City	14	Otago Region	2.31653e+06	5.48004e+06	1	2864400	9	1108	77	3
2865601	231	603601	North Dunedin	7103	Cargill Ward	71	Dunedin City	14	Otago Region	2.31688e+06	5.48037e+06	1	2865601	9	1130	104	3
2865500	147	603601	North Dunedin	7103	Cargill Ward	71	Dunedin City	14	Otago Region	2.31678e+06	5.48038e+06	1	2865500	9	1075	66	3
2734100	96	597810	Allenton	6303	Ashburton Ward	63	Ashburton District	13	Canterbury Region	2.41075e+06	5.70101e+06	1	2734100	2	914	32	1
2865602	195	603601	North Dunedin	7103	Cargill Ward	71	Dunedin City	14	Otago Region	2.3169e+06	5.4803e+06	1	2865602	9	1130	88	3
2734300	108	597830	Netherby	6303	Ashburton Ward	63	Ashburton District	13	Canterbury Region	2.41073e+06	5.70062e+06	1	2734300	6	990	38	2
2734200	21	597810	Allenton	6303	Ashburton Ward	63	Ashburton District	13	Canterbury Region	2.41047e+06	5.70078e+06	1	2734200	2	914	7	1
2865400	129	603601	North Dunedin	7103	Cargill Ward	71	Dunedin City	14	Otago Region	2.31686e+06	5.4806e+06	1	2865400	9	1081	58	3
2865000	153	603601	North Dunedin	7103	Cargill Ward	71	Dunedin City	14	Otago Region	2.31652e+06	5.48034e+06	1	2865000	8	1069	69	3
372400	192	514600	Avondale South	702	Avondale-Roskill Ward	7	Auckland City	02	Auckland Region	2.66217e+06	6.47515e+06	1	372400	4	947	67	2
2732600	102	597840	Ashburton Central East	6303	Ashburton Ward	63	Ashburton District	13	Canterbury Region	2.40994e+06	5.69989e+06	1	2732600	8	1039	46	3
372500	102	514600	Avondale South	702	Avondale-Roskill Ward	7	Auckland City	02	Auckland Region	2.66215e+06	6.475e+06	1	372500	3	935	34	1
3124400	78	610900	Windsor	7599	Area Outside Ward	75	Invercargill City	15	Southland Region	2.15372e+06	5.41359e+06	1	3124400	2	902	26	1
3124300	75	610900	Windsor	7599	Area Outside Ward	75	Invercargill City	15	Southland Region	2.15335e+06	5.41358e+06	1	3124300	2	917	25	1
3124900	63	610900	Windsor	7599	Area Outside Ward	75	Invercargill City	15	Southland Region	2.15422e+06	5.41359e+06	1	3124900	5	969	22	2
3124500	87	610900	Windsor	7599	Area Outside Ward	75	Invercargill City	15	Southland Region	2.15401e+06	5.41361e+06	1	3124500	2	902	29	1
373001	57	514600	Avondale South	702	Avondale-Roskill Ward	7	Auckland City	02	Auckland Region	2.6623e+06	6.47484e+06	1	373001	3	927	19	1
372300	192	514600	Avondale South	702	Avondale-Roskill Ward	7	Auckland City	02	Auckland Region	2.66183e+06	6.47491e+06	1	372300	4	948	67	2
896800	192	530200	Hamilton East	1603	South Ward	16	Hamilton City	03	Waikato Region	2.71213e+06	6.37681e+06	1	896800	7	1027	67	2
3125100	75	610900	Windsor	7599	Area Outside Ward	75	Invercargill City	15	Southland Region	2.15369e+06	5.4134e+06	1	3125100	4	950	26	2
3125200	123	610900	Windsor	7599	Area Outside Ward	75	Invercargill City	15	Southland Region	2.15406e+06	5.41342e+06	1	3125200	1	890	41	1
2443200	204	586306	Rangiora North	5903	Rangiora Ward	59	Waimakariri District	13	Canterbury Region	2.47658e+06	5.76731e+06	1	2443200	5	957	71	2
2866000	165	603601	North Dunedin	7103	Cargill Ward	71	Dunedin City	14	Otago Region	2.31681e+06	5.48013e+06	1	2866000	9	1121	74	3
2865900	207	603601	North Dunedin	7103	Cargill Ward	71	Dunedin City	14	Otago Region	2.3167e+06	5.48016e+06	1	2865900	9	1078	93	3
2866300	159	603601	North Dunedin	7103	Cargill Ward	71	Dunedin City	14	Otago Region	2.31706e+06	5.48003e+06	1	2866300	10	1169	72	3
2866800	114	603602	Otago University	7103	Cargill Ward	71	Dunedin City	14	Otago Region	2.31696e+06	5.47985e+06	1	2866800	10	1169	51	3
2866700	189	603602	Otago University	7103	Cargill Ward	71	Dunedin City	14	Otago Region	2.31684e+06	5.47989e+06	1	2866700	9	1132	85	3
3129000	63	611001	Waverley-Glengarry	7599	Area Outside Ward	75	Invercargill City	15	Southland Region	2.15511e+06	5.41358e+06	1	3129000	7	1005	22	2
3129100	18	611001	Waverley-Glengarry	7599	Area Outside Ward	75	Invercargill City	15	Southland Region	2.15527e+06	5.41364e+06	1	3129100	7	1005	6	2
3128900	90	611001	Waverley-Glengarry	7599	Area Outside Ward	75	Invercargill City	15	Southland Region	2.15496e+06	5.41359e+06	1	3128900	4	942	31	2
2735101	171	597810	Allenton	6303	Ashburton Ward	63	Ashburton District	13	Canterbury Region	2.41022e+06	5.70091e+06	1	2735101	1	883	56	1
2865700	126	603601	North Dunedin	7103	Cargill Ward	71	Dunedin City	14	Otago Region	2.31698e+06	5.48028e+06	1	2865700	10	1146	57	3
2865800	219	603601	North Dunedin	7103	Cargill Ward	71	Dunedin City	14	Otago Region	2.3171e+06	5.48023e+06	1	2865800	10	1140	99	3
2735102	168	597810	Allenton	6303	Ashburton Ward	63	Ashburton District	13	Canterbury Region	2.41003e+06	5.70069e+06	1	2735102	2	907	55	1
2735200	216	597810	Allenton	6303	Ashburton Ward	63	Ashburton District	13	Canterbury Region	2.40994e+06	5.70057e+06	1	2735200	4	938	76	2
2159800	330	573200	Aro Street-Nairn Street	4703	Lambton Ward	47	Wellington City	09	Wellington Region	2.65818e+06	5.98826e+06	1	2159800	10	1310	148	3
2866200	183	603601	North Dunedin	7103	Cargill Ward	71	Dunedin City	14	Otago Region	2.317e+06	5.48004e+06	1	2866200	10	1158	82	3
2866101	201	603601	North Dunedin	7103	Cargill Ward	71	Dunedin City	14	Otago Region	2.31693e+06	5.48013e+06	1	2866101	9	1093	90	3
2734700	261	597810	Allenton	6303	Ashburton Ward	63	Ashburton District	13	Canterbury Region	2.41027e+06	5.70151e+06	1	2734700	3	922	86	1
373900	156	514600	Avondale South	702	Avondale-Roskill Ward	7	Auckland City	02	Auckland Region	2.66311e+06	6.47482e+06	1	373900	3	921	51	1
373800	135	514600	Avondale South	702	Avondale-Roskill Ward	7	Auckland City	02	Auckland Region	2.66289e+06	6.4748e+06	1	373800	6	975	47	2
2865200	147	603601	North Dunedin	7103	Cargill Ward	71	Dunedin City	14	Otago Region	2.31663e+06	5.48039e+06	1	2865200	9	1137	66	3
2865100	72	603601	North Dunedin	7103	Cargill Ward	71	Dunedin City	14	Otago Region	2.3164e+06	5.48012e+06	1	2865100	8	1069	32	3
2734000	162	597810	Allenton	6303	Ashburton Ward	63	Ashburton District	13	Canterbury Region	2.41052e+06	5.70112e+06	1	2734000	7	1024	57	2
373600	105	514600	Avondale South	702	Avondale-Roskill Ward	7	Auckland City	02	Auckland Region	2.6632e+06	6.47497e+06	1	373600	5	966	37	2
2734600	159	597830	Netherby	6303	Ashburton Ward	63	Ashburton District	13	Canterbury Region	2.41052e+06	5.7003e+06	1	2734600	6	996	56	2
2734400	120	597830	Netherby	6303	Ashburton Ward	63	Ashburton District	13	Canterbury Region	2.41061e+06	5.70048e+06	1	2734400	4	949	42	2
378300	264	514402	Glenavon	702	Avondale-Roskill Ward	7	Auckland City	02	Auckland Region	2.66213e+06	6.47578e+06	1	378300	9	1119	119	3
3129700	75	611001	Waverley-Glengarry	7599	Area Outside Ward	75	Invercargill City	15	Southland Region	2.15482e+06	5.41349e+06	1	3129700	7	1008	26	2
378800	177	514402	Glenavon	702	Avondale-Roskill Ward	7	Auckland City	02	Auckland Region	2.66219e+06	6.47544e+06	1	378800	10	1183	80	3
2866400	99	603601	North Dunedin	7103	Cargill Ward	71	Dunedin City	14	Otago Region	2.3166e+06	5.47999e+06	1	2866400	9	1123	45	3
2866500	96	603601	North Dunedin	7103	Cargill Ward	71	Dunedin City	14	Otago Region	2.31666e+06	5.47997e+06	1	2866500	9	1078	43	3
2866102	165	603601	North Dunedin	7103	Cargill Ward	71	Dunedin City	14	Otago Region	2.31689e+06	5.48002e+06	1	2866102	8	1069	74	3
2734900	120	597810	Allenton	6303	Ashburton Ward	63	Ashburton District	13	Canterbury Region	2.41045e+06	5.70128e+06	1	2734900	7	1006	42	2
3128600	57	611001	Waverley-Glengarry	7599	Area Outside Ward	75	Invercargill City	15	Southland Region	2.15446e+06	5.4136e+06	1	3128600	4	943	20	2
3128500	57	611001	Waverley-Glengarry	7599	Area Outside Ward	75	Invercargill City	15	Southland Region	2.15434e+06	5.41359e+06	1	3128500	4	943	20	2
3128800	54	611001	Waverley-Glengarry	7599	Area Outside Ward	75	Invercargill City	15	Southland Region	2.15471e+06	5.41361e+06	1	3128800	4	942	19	2
3128700	57	611001	Waverley-Glengarry	7599	Area Outside Ward	75	Invercargill City	15	Southland Region	2.15458e+06	5.4136e+06	1	3128700	4	943	20	2
3129300	66	611001	Waverley-Glengarry	7599	Area Outside Ward	75	Invercargill City	15	Southland Region	2.15435e+06	5.41338e+06	1	3129300	2	914	22	1
3129400	54	611001	Waverley-Glengarry	7599	Area Outside Ward	75	Invercargill City	15	Southland Region	2.15447e+06	5.4134e+06	1	3129400	2	914	18	1
2870900	114	603300	North East Valley	7103	Cargill Ward	71	Dunedin City	14	Otago Region	2.31747e+06	5.48065e+06	1	2870900	10	1144	51	3
2477500	81	587701	Sockburn	6004	Riccarton-Wigram Ward	60	Christchurch City	13	Canterbury Region	2.47559e+06	5.74092e+06	1	2477500	8	1031	36	3
2738900	36	597820	Ashburton Central West	6303	Ashburton Ward	63	Ashburton District	13	Canterbury Region	2.40896e+06	5.69967e+06	1	2738900	9	1125	16	3
2739000	15	597820	Ashburton Central West	6303	Ashburton Ward	63	Ashburton District	13	Canterbury Region	2.40929e+06	5.69972e+06	1	2739000	9	1125	7	3
379900	81	514402	Glenavon	702	Avondale-Roskill Ward	7	Auckland City	02	Auckland Region	2.66187e+06	6.47543e+06	1	379900	10	1199	36	3
2870500	147	603300	North East Valley	7103	Cargill Ward	71	Dunedin City	14	Otago Region	2.31769e+06	5.48092e+06	1	2870500	6	989	51	2
2870600	174	603300	North East Valley	7103	Cargill Ward	71	Dunedin City	14	Otago Region	2.3176e+06	5.48087e+06	1	2870600	6	999	61	2
2870700	384	603300	North East Valley	7103	Cargill Ward	71	Dunedin City	14	Otago Region	2.31752e+06	5.48083e+06	1	2870700	7	1025	134	2
2870800	15	603300	North East Valley	7103	Cargill Ward	71	Dunedin City	14	Otago Region	2.31731e+06	5.48073e+06	1	2870800	7	1014	5	2
2871100	63	603300	North East Valley	7103	Cargill Ward	71	Dunedin City	14	Otago Region	2.31821e+06	5.48135e+06	1	2871100	7	1003	22	2
2871000	147	603300	North East Valley	7103	Cargill Ward	71	Dunedin City	14	Otago Region	2.31834e+06	5.48133e+06	1	2871000	6	984	51	2
379800	81	514402	Glenavon	702	Avondale-Roskill Ward	7	Auckland City	02	Auckland Region	2.66176e+06	6.47553e+06	1	379800	8	1051	36	3
2869400	162	603601	North Dunedin	7103	Cargill Ward	71	Dunedin City	14	Otago Region	2.31717e+06	5.48005e+06	1	2869400	9	1108	73	3
378600	138	514402	Glenavon	702	Avondale-Roskill Ward	7	Auckland City	02	Auckland Region	2.66227e+06	6.47567e+06	1	378600	8	1064	62	3
3129500	69	611001	Waverley-Glengarry	7599	Area Outside Ward	75	Invercargill City	15	Southland Region	2.15459e+06	5.41341e+06	1	3129500	8	1070	31	3
3129600	81	611001	Waverley-Glengarry	7599	Area Outside Ward	75	Invercargill City	15	Southland Region	2.15471e+06	5.4134e+06	1	3129600	7	1008	28	2
2871300	81	603300	North East Valley	7103	Cargill Ward	71	Dunedin City	14	Otago Region	2.31789e+06	5.4813e+06	1	2871300	7	1003	28	2
2871200	126	603300	North East Valley	7103	Cargill Ward	71	Dunedin City	14	Otago Region	2.31818e+06	5.48122e+06	1	2871200	7	1014	44	2
2871900	108	603300	North East Valley	7103	Cargill Ward	71	Dunedin City	14	Otago Region	2.3188e+06	5.48187e+06	1	2871900	5	965	38	2
2871800	51	603300	North East Valley	7103	Cargill Ward	71	Dunedin City	14	Otago Region	2.31892e+06	5.48189e+06	1	2871800	6	985	18	2
2872300	75	603300	North East Valley	7103	Cargill Ward	71	Dunedin City	14	Otago Region	2.31859e+06	5.48143e+06	1	2872300	6	985	26	2
2871700	129	603300	North East Valley	7103	Cargill Ward	71	Dunedin City	14	Otago Region	2.31782e+06	5.48107e+06	1	2871700	7	1023	45	2
2871400	123	603300	North East Valley	7103	Cargill Ward	71	Dunedin City	14	Otago Region	2.318e+06	5.48117e+06	1	2871400	6	983	43	2
2872500	51	603300	North East Valley	7103	Cargill Ward	71	Dunedin City	14	Otago Region	2.31837e+06	5.48198e+06	1	2872500	8	1031	23	3
2872700	108	603300	North East Valley	7103	Cargill Ward	71	Dunedin City	14	Otago Region	2.3183e+06	5.48184e+06	1	2872700	6	981	38	2
2738800	105	597820	Ashburton Central West	6303	Ashburton Ward	63	Ashburton District	13	Canterbury Region	2.40913e+06	5.69984e+06	1	2738800	4	952	37	2
2870400	75	603300	North East Valley	7103	Cargill Ward	71	Dunedin City	14	Otago Region	2.31772e+06	5.48099e+06	1	2870400	7	1025	26	2
2870300	135	603300	North East Valley	7103	Cargill Ward	71	Dunedin City	14	Otago Region	2.31776e+06	5.48103e+06	1	2870300	7	1000	47	2
2739100	3	597820	Ashburton Central West	6303	Ashburton Ward	63	Ashburton District	13	Canterbury Region	2.40911e+06	5.69955e+06	1	2739100	9	1125	1	3
2869800	21	603602	Otago University	7103	Cargill Ward	71	Dunedin City	14	Otago Region	2.31709e+06	5.47986e+06	1	2869800	9	1108	9	3
696804	159	522301	Dingwall	802	Papatoetoe Ward	8	Manukau City	02	Auckland Region	2.67606e+06	6.46933e+06	1	696804	3	923	52	1
379400	309	514402	Glenavon	702	Avondale-Roskill Ward	7	Auckland City	02	Auckland Region	2.66181e+06	6.47599e+06	1	379400	7	1007	108	2
379500	237	514402	Glenavon	702	Avondale-Roskill Ward	7	Auckland City	02	Auckland Region	2.66183e+06	6.47572e+06	1	379500	7	1023	83	2
379600	222	514402	Glenavon	702	Avondale-Roskill Ward	7	Auckland City	02	Auckland Region	2.66194e+06	6.47557e+06	1	379600	8	1067	100	3
2087607	147	574200	Khandallah Park	4702	Onslow-Western Ward	47	Wellington City	09	Wellington Region	2.66043e+06	5.99523e+06	1	2087607	1	896	49	1
2087300	153	574200	Khandallah Park	4702	Onslow-Western Ward	47	Wellington City	09	Wellington Region	2.65992e+06	5.99444e+06	1	2087300	1	856	50	1
2087900	114	574200	Khandallah Park	4702	Onslow-Western Ward	47	Wellington City	09	Wellington Region	2.66054e+06	5.99496e+06	1	2087900	1	893	38	1
645100	156	521601	Howick West	806	Howick Ward	8	Manukau City	02	Auckland Region	2.68122e+06	6.47657e+06	1	645100	3	933	51	1
2087500	99	574200	Khandallah Park	4702	Onslow-Western Ward	47	Wellington City	09	Wellington Region	2.65984e+06	5.99422e+06	1	2087500	1	853	33	1
2087200	117	574200	Khandallah Park	4702	Onslow-Western Ward	47	Wellington City	09	Wellington Region	2.6601e+06	5.99457e+06	1	2087200	1	887	39	1
2873800	114	603300	North East Valley	7103	Cargill Ward	71	Dunedin City	14	Otago Region	2.31693e+06	5.48094e+06	1	2873800	9	1108	51	3
645400	87	521601	Howick West	806	Howick Ward	8	Manukau City	02	Auckland Region	2.68115e+06	6.47636e+06	1	645400	7	1010	30	2
2088100	120	574200	Khandallah Park	4702	Onslow-Western Ward	47	Wellington City	09	Wellington Region	2.66018e+06	5.99466e+06	1	2088100	2	901	40	1
2088000	69	574200	Khandallah Park	4702	Onslow-Western Ward	47	Wellington City	09	Wellington Region	2.66034e+06	5.99473e+06	1	2088000	3	927	23	1
2873700	252	603300	North East Valley	7103	Cargill Ward	71	Dunedin City	14	Otago Region	2.31717e+06	5.48084e+06	1	2873700	8	1056	113	3
2873000	132	603300	North East Valley	7103	Cargill Ward	71	Dunedin City	14	Otago Region	2.31786e+06	5.48151e+06	1	2873000	8	1062	59	3
2873100	123	603300	North East Valley	7103	Cargill Ward	71	Dunedin City	14	Otago Region	2.31777e+06	5.48145e+06	1	2873100	9	1092	55	3
2872900	123	603300	North East Valley	7103	Cargill Ward	71	Dunedin City	14	Otago Region	2.31794e+06	5.48154e+06	1	2872900	9	1118	55	3
645800	144	521601	Howick West	806	Howick Ward	8	Manukau City	02	Auckland Region	2.68161e+06	6.47698e+06	1	645800	2	902	48	1
515203	261	520801	Waiheke Island	707	Hauraki Gulf Islands Ward	7	Auckland City	02	Auckland Region	2.69345e+06	6.48811e+06	1	515203	8	1053	117	3
645300	162	521601	Howick West	806	Howick Ward	8	Manukau City	02	Auckland Region	2.68087e+06	6.47637e+06	1	645300	7	1004	57	2
515202	183	520801	Waiheke Island	707	Hauraki Gulf Islands Ward	7	Auckland City	02	Auckland Region	2.69315e+06	6.48834e+06	1	515202	8	1031	82	3
645000	189	521601	Howick West	806	Howick Ward	8	Manukau City	02	Auckland Region	2.68096e+06	6.47655e+06	1	645000	3	932	62	1
2873400	174	603300	North East Valley	7103	Cargill Ward	71	Dunedin City	14	Otago Region	2.31739e+06	5.48111e+06	1	2873400	9	1113	78	3
908400	75	529700	Hamilton Central	1601	West Ward	16	Hamilton City	03	Waikato Region	2.71037e+06	6.37835e+06	1	908400	8	1044	34	3
2873600	108	603300	North East Valley	7103	Cargill Ward	71	Dunedin City	14	Otago Region	2.31714e+06	5.48098e+06	1	2873600	8	1040	49	3
646300	192	521601	Howick West	806	Howick Ward	8	Manukau City	02	Auckland Region	2.68161e+06	6.4766e+06	1	646300	3	924	63	1
2139200	57	573400	Mt Victoria West	4703	Lambton Ward	47	Wellington City	09	Wellington Region	2.65993e+06	5.98889e+06	1	2139200	3	933	19	1
645200	132	521601	Howick West	806	Howick Ward	8	Manukau City	02	Auckland Region	2.68068e+06	6.47648e+06	1	645200	5	968	46	2
2871500	66	603300	North East Valley	7103	Cargill Ward	71	Dunedin City	14	Otago Region	2.31813e+06	5.48106e+06	1	2871500	7	1002	23	2
2872600	150	603300	North East Valley	7103	Cargill Ward	71	Dunedin City	14	Otago Region	2.31862e+06	5.48191e+06	1	2872600	7	1023	52	2
2872800	78	603300	North East Valley	7103	Cargill Ward	71	Dunedin City	14	Otago Region	2.31805e+06	5.48155e+06	1	2872800	8	1031	35	3
2872000	108	603300	North East Valley	7103	Cargill Ward	71	Dunedin City	14	Otago Region	2.3187e+06	5.48173e+06	1	2872000	5	957	38	2
2872100	177	603300	North East Valley	7103	Cargill Ward	71	Dunedin City	14	Otago Region	2.31869e+06	5.48161e+06	1	2872100	6	978	62	2
2872200	51	603300	North East Valley	7103	Cargill Ward	71	Dunedin City	14	Otago Region	2.31845e+06	5.48157e+06	1	2872200	6	978	18	2
2872400	183	603300	North East Valley	7103	Cargill Ward	71	Dunedin City	14	Otago Region	2.31842e+06	5.48141e+06	1	2872400	6	998	64	2
172904	204	505802	Red Beach	403	Eastern Ward	4	Rodney District	02	Auckland Region	2.66231e+06	6.50969e+06	1	172904	3	932	67	1
2089900	42	574302	Te Kainga	4702	Onslow-Western Ward	47	Wellington City	09	Wellington Region	2.66053e+06	5.99391e+06	1	2089900	1	885	14	1
2089200	144	574304	Rangoon Heights	4702	Onslow-Western Ward	47	Wellington City	09	Wellington Region	2.6606e+06	5.99438e+06	1	2089200	2	900	48	1
647800	204	521602	Howick Central	806	Howick Ward	8	Manukau City	02	Auckland Region	2.68174e+06	6.47603e+06	1	647800	2	913	67	1
2874600	81	603400	Pine Hill	7103	Cargill Ward	71	Dunedin City	14	Otago Region	2.31662e+06	5.48129e+06	1	2874600	7	1014	28	2
646600	144	521602	Howick Central	806	Howick Ward	8	Manukau City	02	Auckland Region	2.68209e+06	6.47684e+06	1	646600	3	920	48	1
647700	276	521602	Howick Central	806	Howick Ward	8	Manukau City	02	Auckland Region	2.68143e+06	6.4761e+06	1	647700	9	1086	124	3
2089400	96	574304	Rangoon Heights	4702	Onslow-Western Ward	47	Wellington City	09	Wellington Region	2.66047e+06	5.99424e+06	1	2089400	1	878	32	1
648100	129	521602	Howick Central	806	Howick Ward	8	Manukau City	02	Auckland Region	2.68144e+06	6.47576e+06	1	648100	3	932	43	1
2874800	132	603400	Pine Hill	7103	Cargill Ward	71	Dunedin City	14	Otago Region	2.3167e+06	5.48099e+06	1	2874800	6	993	46	2
2088900	120	574304	Rangoon Heights	4702	Onslow-Western Ward	47	Wellington City	09	Wellington Region	2.66053e+06	5.99468e+06	1	2088900	1	888	40	1
647000	186	521602	Howick Central	806	Howick Ward	8	Manukau City	02	Auckland Region	2.68194e+06	6.47644e+06	1	647000	3	920	61	1
646402	147	521601	Howick West	806	Howick Ward	8	Manukau City	02	Auckland Region	2.6813e+06	6.47658e+06	1	646402	2	918	49	1
2088500	216	574200	Khandallah Park	4702	Onslow-Western Ward	47	Wellington City	09	Wellington Region	2.65952e+06	5.99392e+06	1	2088500	1	863	71	1
2089600	138	574304	Rangoon Heights	4702	Onslow-Western Ward	47	Wellington City	09	Wellington Region	2.66075e+06	5.99396e+06	1	2089600	1	894	46	1
1695500	78	557900	Durie Hill	3702	Urban Ward	37	Wanganui District	08	Manawatu-Wanganui Region	2.68612e+06	6.13921e+06	1	1695500	3	923	26	1
909900	57	529700	Hamilton Central	1601	West Ward	16	Hamilton City	03	Waikato Region	2.71099e+06	6.37759e+06	1	909900	8	1033	26	3
2088600	168	574200	Khandallah Park	4702	Onslow-Western Ward	47	Wellington City	09	Wellington Region	2.65948e+06	5.99375e+06	1	2088600	1	896	55	1
2088704	3	574303	Ngauranga West	4702	Onslow-Western Ward	47	Wellington City	09	Wellington Region	2.66088e+06	5.99501e+06	1	2088704	1	876	1	1
909401	93	529700	Hamilton Central	1601	West Ward	16	Hamilton City	03	Waikato Region	2.71073e+06	6.37799e+06	1	909401	9	1093	42	3
2874900	111	603400	Pine Hill	7103	Cargill Ward	71	Dunedin City	14	Otago Region	2.3165e+06	5.48112e+06	1	2874900	5	970	39	2
2874700	129	603400	Pine Hill	7103	Cargill Ward	71	Dunedin City	14	Otago Region	2.31681e+06	5.48113e+06	1	2874700	8	1033	58	3
646500	90	521601	Howick West	806	Howick Ward	8	Manukau City	02	Auckland Region	2.68137e+06	6.47634e+06	1	646500	3	933	30	1
646200	144	521601	Howick West	806	Howick Ward	8	Manukau City	02	Auckland Region	2.6814e+06	6.47672e+06	1	646200	3	933	48	1
646800	150	521602	Howick Central	806	Howick Ward	8	Manukau City	02	Auckland Region	2.68184e+06	6.47676e+06	1	646800	2	913	50	1
2480502	9	590300	Middleton	6004	Riccarton-Wigram Ward	60	Christchurch City	13	Canterbury Region	2.47591e+06	5.74033e+06	1	2480502	8	1042	4	3
2087400	81	574200	Khandallah Park	4702	Onslow-Western Ward	47	Wellington City	09	Wellington Region	2.65973e+06	5.99432e+06	1	2087400	1	853	27	1
647400	213	521602	Howick Central	806	Howick Ward	8	Manukau City	02	Auckland Region	2.68165e+06	6.47633e+06	1	647400	2	917	70	1
646401	78	521601	Howick West	806	Howick Ward	8	Manukau City	02	Auckland Region	2.68148e+06	6.47656e+06	1	646401	5	968	27	2
2087800	177	574200	Khandallah Park	4702	Onslow-Western Ward	47	Wellington City	09	Wellington Region	2.66045e+06	5.995e+06	1	2087800	3	927	58	1
646000	84	521601	Howick West	806	Howick Ward	8	Manukau City	02	Auckland Region	2.68178e+06	6.47687e+06	1	646000	4	949	29	2
645900	114	521601	Howick West	806	Howick Ward	8	Manukau City	02	Auckland Region	2.68166e+06	6.47686e+06	1	645900	4	949	40	2
2873900	123	603300	North East Valley	7103	Cargill Ward	71	Dunedin City	14	Otago Region	2.317e+06	5.48081e+06	1	2873900	8	1034	55	3
2873200	102	603300	North East Valley	7103	Cargill Ward	71	Dunedin City	14	Otago Region	2.31771e+06	5.48139e+06	1	2873200	7	1002	36	2
2873300	99	603300	North East Valley	7103	Cargill Ward	71	Dunedin City	14	Otago Region	2.31765e+06	5.48127e+06	1	2873300	9	1108	45	3
2091601	66	574302	Te Kainga	4702	Onslow-Western Ward	47	Wellington City	09	Wellington Region	2.66061e+06	5.99343e+06	1	2091601	1	869	22	1
1698300	18	557100	Cooks Gardens	3702	Urban Ward	37	Wanganui District	08	Manawatu-Wanganui Region	2.68555e+06	6.13917e+06	1	1698300	9	1075	8	3
2877500	75	603220	Forrester Park	7103	Cargill Ward	71	Dunedin City	14	Otago Region	2.31887e+06	5.48215e+06	1	2877500	5	960	26	2
2484612	45	587846	Halswell Domain	6004	Riccarton-Wigram Ward	60	Christchurch City	13	Canterbury Region	2.47573e+06	5.73625e+06	1	2484612	1	891	15	1
2484619	57	587846	Halswell Domain	6004	Riccarton-Wigram Ward	60	Christchurch City	13	Canterbury Region	2.47595e+06	5.7363e+06	1	2484619	1	890	19	1
2484618	105	587846	Halswell Domain	6004	Riccarton-Wigram Ward	60	Christchurch City	13	Canterbury Region	2.47583e+06	5.73622e+06	1	2484618	1	889	35	1
2484610	54	587846	Halswell Domain	6004	Riccarton-Wigram Ward	60	Christchurch City	13	Canterbury Region	2.4755e+06	5.73607e+06	1	2484610	3	925	18	1
2484620	81	587846	Halswell Domain	6004	Riccarton-Wigram Ward	60	Christchurch City	13	Canterbury Region	2.47594e+06	5.73607e+06	1	2484620	1	887	27	1
2483803	168	587302	Halswell South	6004	Riccarton-Wigram Ward	60	Christchurch City	13	Canterbury Region	2.47493e+06	5.73598e+06	1	2483803	2	918	55	1
2484617	93	587846	Halswell Domain	6004	Riccarton-Wigram Ward	60	Christchurch City	13	Canterbury Region	2.47579e+06	5.73601e+06	1	2484617	1	883	31	1
2090603	186	574302	Te Kainga	4702	Onslow-Western Ward	47	Wellington City	09	Wellington Region	2.66066e+06	5.99353e+06	1	2090603	1	892	61	1
2091000	96	574302	Te Kainga	4702	Onslow-Western Ward	47	Wellington City	09	Wellington Region	2.66015e+06	5.99415e+06	1	2091000	3	919	32	1
648701	42	521602	Howick Central	806	Howick Ward	8	Manukau City	02	Auckland Region	2.68165e+06	6.4757e+06	1	648701	3	921	14	1
2877300	111	603220	Forrester Park	7103	Cargill Ward	71	Dunedin City	14	Otago Region	2.31911e+06	5.48192e+06	1	2877300	9	1074	50	3
2483809	108	587302	Halswell South	6004	Riccarton-Wigram Ward	60	Christchurch City	13	Canterbury Region	2.47491e+06	5.73575e+06	1	2483809	1	869	36	1
2484613	72	587846	Halswell Domain	6004	Riccarton-Wigram Ward	60	Christchurch City	13	Canterbury Region	2.47537e+06	5.73582e+06	1	2484613	2	902	24	1
2483909	78	587302	Halswell South	6004	Riccarton-Wigram Ward	60	Christchurch City	13	Canterbury Region	2.47511e+06	5.73571e+06	1	2483909	2	905	26	1
2091500	138	574302	Te Kainga	4702	Onslow-Western Ward	47	Wellington City	09	Wellington Region	2.66041e+06	5.99365e+06	1	2091500	1	852	46	1
1697600	3	557100	Cooks Gardens	3702	Urban Ward	37	Wanganui District	08	Manawatu-Wanganui Region	2.6851e+06	6.13887e+06	1	1697600	9	1075	1	3
1698100	12	557100	Cooks Gardens	3702	Urban Ward	37	Wanganui District	08	Manawatu-Wanganui Region	2.68572e+06	6.13936e+06	1	1698100	9	1075	5	3
1698600	12	557100	Cooks Gardens	3702	Urban Ward	37	Wanganui District	08	Manawatu-Wanganui Region	2.68523e+06	6.13944e+06	1	1698600	9	1075	5	3
2091200	138	574302	Te Kainga	4702	Onslow-Western Ward	47	Wellington City	09	Wellington Region	2.66025e+06	5.99396e+06	1	2091200	1	878	46	1
2876900	150	603220	Forrester Park	7103	Cargill Ward	71	Dunedin City	14	Otago Region	2.3195e+06	5.48244e+06	1	2876900	7	1001	52	2
2483904	168	587302	Halswell South	6004	Riccarton-Wigram Ward	60	Christchurch City	13	Canterbury Region	2.47511e+06	5.73536e+06	1	2483904	1	880	55	1
2091700	78	574302	Te Kainga	4702	Onslow-Western Ward	47	Wellington City	09	Wellington Region	2.66011e+06	5.99358e+06	1	2091700	3	925	26	1
2091800	132	574302	Te Kainga	4702	Onslow-Western Ward	47	Wellington City	09	Wellington Region	2.6603e+06	5.99349e+06	1	2091800	1	874	44	1
[truncated: 147 more rows]
