# Supplementary material for: Optimising locational access of deprived populations to farmers’ markets at a national scale: one route to improved fruit and vegetable consumption?
Source: PeerJ. 2013 Jul 2;1:e94. doi: 10.7717/peerj.94 (PMC3709110; doi:10.7717/peerj.94)
Supplement: Supplemental Information 9 [file peerj-01-94-s009.xlsx]

## Sheet: Pop_Scenario2_5kBuffer
MB2006	MBUR_POP20	CAU2006	CAU_DESCR	WARD_COD	WARD_DES	TA_CODE	TA_DESC	RC_COD	RC_DESC	POINT_X	POINT_Y	Cnt_MB2006	MB2006_1	NZDep2006	NZDep_scor	Weight	DepCat
2098000	75	574402	Ngaio	4702	Onslow-Western Ward	47	Wellington City	09	Wellington Region	2.65851e+06	5.99347e+06	1	2098000	1	879	25	1
2119200	45	572900	Thorndon-Tinakori Road	4703	Lambton Ward	47	Wellington City	09	Wellington Region	2.65901e+06	5.99091e+06	1	2119200	6	977	16	2
2098200	189	574402	Ngaio	4702	Onslow-Western Ward	47	Wellington City	09	Wellington Region	2.65853e+06	5.99321e+06	1	2098200	1	868	62	1
786801	165	521801	Otahuhu North	706	Tamaki-Maungakiekie Ward	7	Auckland City	02	Auckland Region	2.67463e+06	6.47205e+06	1	786801	10	1145	74	3
786902	135	521801	Otahuhu North	706	Tamaki-Maungakiekie Ward	7	Auckland City	02	Auckland Region	2.67479e+06	6.47196e+06	1	786902	9	1123	61	3
2098501	57	574600	Wadestown	4703	Lambton Ward	47	Wellington City	09	Wellington Region	2.65902e+06	5.99265e+06	1	2098501	1	871	19	1
2097300	42	574402	Ngaio	4702	Onslow-Western Ward	47	Wellington City	09	Wellington Region	2.65925e+06	5.99335e+06	1	2097300	2	904	14	1
2098100	276	574402	Ngaio	4702	Onslow-Western Ward	47	Wellington City	09	Wellington Region	2.65832e+06	5.99318e+06	1	2098100	1	893	91	1
2097504	33	574402	Ngaio	4702	Onslow-Western Ward	47	Wellington City	09	Wellington Region	2.65916e+06	5.99331e+06	1	2097504	1	877	11	1
2119100	6	572900	Thorndon-Tinakori Road	4703	Lambton Ward	47	Wellington City	09	Wellington Region	2.6591e+06	5.99085e+06	1	2119100	6	977	2	2
787900	24	521802	Fairburn	706	Tamaki-Maungakiekie Ward	7	Auckland City	02	Auckland Region	2.67497e+06	6.47149e+06	1	787900	10	1152	11	3
786802	189	521801	Otahuhu North	706	Tamaki-Maungakiekie Ward	7	Auckland City	02	Auckland Region	2.67465e+06	6.47191e+06	1	786802	10	1188	85	3
2097400	69	574402	Ngaio	4702	Onslow-Western Ward	47	Wellington City	09	Wellington Region	2.65866e+06	5.99325e+06	1	2097400	1	877	23	1
1203203	105	536810	Mt Maunganui North	2301	Mount Maunganui-Papamoa Ward	23	Tauranga City	04	Bay of Plenty Region	2.79154e+06	6.38985e+06	1	1203203	8	1066	47	3
787400	336	521801	Otahuhu North	706	Tamaki-Maungakiekie Ward	7	Auckland City	02	Auckland Region	2.67489e+06	6.47175e+06	1	787400	9	1131	151	3
2097601	204	574402	Ngaio	4702	Onslow-Western Ward	47	Wellington City	09	Wellington Region	2.65872e+06	5.99305e+06	1	2097601	1	874	67	1
2097900	9	574402	Ngaio	4702	Onslow-Western Ward	47	Wellington City	09	Wellington Region	2.65799e+06	5.99291e+06	1	2097900	1	879	3	1
2097700	3	574402	Ngaio	4702	Onslow-Western Ward	47	Wellington City	09	Wellington Region	2.65849e+06	5.99354e+06	1	2097700	1	879	1	1
787300	99	521801	Otahuhu North	706	Tamaki-Maungakiekie Ward	7	Auckland City	02	Auckland Region	2.67471e+06	6.4717e+06	1	787300	10	1152	45	3
2098602	33	574600	Wadestown	4703	Lambton Ward	47	Wellington City	09	Wellington Region	2.65937e+06	5.9926e+06	1	2098602	1	871	11	1
2098300	111	574402	Ngaio	4702	Onslow-Western Ward	47	Wellington City	09	Wellington Region	2.65835e+06	5.99293e+06	1	2098300	1	876	37	1
786901	189	521801	Otahuhu North	706	Tamaki-Maungakiekie Ward	7	Auckland City	02	Auckland Region	2.67485e+06	6.47206e+06	1	786901	10	1185	85	3
2097200	120	574402	Ngaio	4702	Onslow-Western Ward	47	Wellington City	09	Wellington Region	2.65895e+06	5.99331e+06	1	2097200	1	882	40	1
787800	117	521802	Fairburn	706	Tamaki-Maungakiekie Ward	7	Auckland City	02	Auckland Region	2.67477e+06	6.47147e+06	1	787800	10	1165	53	3
1203205	87	536810	Mt Maunganui North	2301	Mount Maunganui-Papamoa Ward	23	Tauranga City	04	Bay of Plenty Region	2.79167e+06	6.38995e+06	1	1203205	9	1110	39	3
786600	84	521801	Otahuhu North	706	Tamaki-Maungakiekie Ward	7	Auckland City	02	Auckland Region	2.67477e+06	6.4722e+06	1	786600	10	1145	38	3
2097503	60	574402	Ngaio	4702	Onslow-Western Ward	47	Wellington City	09	Wellington Region	2.65919e+06	5.99312e+06	1	2097503	1	877	20	1
2097502	45	574402	Ngaio	4702	Onslow-Western Ward	47	Wellington City	09	Wellington Region	2.6593e+06	5.99292e+06	1	2097502	1	877	15	1
264800	132	511402	Rewarewa	604	New Lynn Ward	6	Waitakere City	02	Auckland Region	2.66056e+06	6.47471e+06	1	264800	6	998	46	2
789200	144	521802	Fairburn	706	Tamaki-Maungakiekie Ward	7	Auckland City	02	Auckland Region	2.67526e+06	6.47087e+06	1	789200	9	1131	65	3
2623200	126	594600	Sydenham	6006	Spreydon-Heathcote Ward	60	Christchurch City	13	Canterbury Region	2.48152e+06	5.73918e+06	1	2623200	6	988	44	2
789600	213	521802	Fairburn	706	Tamaki-Maungakiekie Ward	7	Auckland City	02	Auckland Region	2.67499e+06	6.47038e+06	1	789600	9	1115	96	3
789500	174	521802	Fairburn	706	Tamaki-Maungakiekie Ward	7	Auckland City	02	Auckland Region	2.67498e+06	6.4706e+06	1	789500	9	1110	78	3
788602	192	521802	Fairburn	706	Tamaki-Maungakiekie Ward	7	Auckland City	02	Auckland Region	2.67503e+06	6.4712e+06	1	788602	8	1068	86	3
2099300	183	574600	Wadestown	4703	Lambton Ward	47	Wellington City	09	Wellington Region	2.65931e+06	5.99226e+06	1	2099300	2	905	60	1
1706700	54	557200	St Johns Hill	3702	Urban Ward	37	Wanganui District	08	Manawatu-Wanganui Region	2.68422e+06	6.1409e+06	1	1706700	1	887	18	1
2512601	156	588200	Styx Mill	6001	Shirley-Papanui Ward	60	Christchurch City	13	Canterbury Region	2.4789e+06	5.74785e+06	1	2512601	9	1128	70	3
1705700	72	557200	St Johns Hill	3702	Urban Ward	37	Wanganui District	08	Manawatu-Wanganui Region	2.6841e+06	6.14078e+06	1	1705700	1	887	24	1
2119300	105	572900	Thorndon-Tinakori Road	4703	Lambton Ward	47	Wellington City	09	Wellington Region	2.65891e+06	5.9911e+06	1	2119300	7	1016	37	2
265300	120	511303	Lynnmall	604	New Lynn Ward	6	Waitakere City	02	Auckland Region	2.66091e+06	6.47506e+06	1	265300	8	1066	54	3
527400	216	517800	Mt Albert Central	703	Eden-Albert Ward	7	Auckland City	02	Auckland Region	2.6639e+06	6.4785e+06	1	527400	5	958	76	2
789300	141	521802	Fairburn	706	Tamaki-Maungakiekie Ward	7	Auckland City	02	Auckland Region	2.67488e+06	6.47093e+06	1	789300	10	1186	63	3
265200	3	511303	Lynnmall	604	New Lynn Ward	6	Waitakere City	02	Auckland Region	2.66101e+06	6.47552e+06	1	265200	8	1066	1	3
2099100	177	574600	Wadestown	4703	Lambton Ward	47	Wellington City	09	Wellington Region	2.65956e+06	5.99249e+06	1	2099100	2	909	58	1
265000	348	511303	Lynnmall	604	New Lynn Ward	6	Waitakere City	02	Auckland Region	2.66065e+06	6.47519e+06	1	265000	9	1087	157	3
2512604	159	588200	Styx Mill	6001	Shirley-Papanui Ward	60	Christchurch City	13	Canterbury Region	2.4789e+06	5.74758e+06	1	2512604	9	1099	72	3
2099901	21	574600	Wadestown	4703	Lambton Ward	47	Wellington City	09	Wellington Region	2.65893e+06	5.99279e+06	1	2099901	2	909	7	1
1376604	336	544900	Riverdale	2807	Gisborne Ward	28	Gisborne District	05	Gisborne Region	2.94469e+06	6.27252e+06	1	1376604	1	898	111	1
789400	273	521802	Fairburn	706	Tamaki-Maungakiekie Ward	7	Auckland City	02	Auckland Region	2.67481e+06	6.47068e+06	1	789400	9	1098	123	3
788601	189	521802	Fairburn	706	Tamaki-Maungakiekie Ward	7	Auckland City	02	Auckland Region	2.67479e+06	6.47117e+06	1	788601	10	1415	85	3
265100	6	511303	Lynnmall	604	New Lynn Ward	6	Waitakere City	02	Auckland Region	2.66079e+06	6.47558e+06	1	265100	8	1066	3	3
1485800	153	547700	St Leonards	3005	Hastings Ward	30	Hastings District	06	Hawke's Bay Region	2.83925e+06	6.16817e+06	1	1485800	10	1176	69	3
2623100	69	594600	Sydenham	6006	Spreydon-Heathcote Ward	60	Christchurch City	13	Canterbury Region	2.48163e+06	5.73929e+06	1	2623100	6	988	24	2
527100	123	517800	Mt Albert Central	703	Eden-Albert Ward	7	Auckland City	02	Auckland Region	2.66408e+06	6.47863e+06	1	527100	6	992	43	2
789100	234	521802	Fairburn	706	Tamaki-Maungakiekie Ward	7	Auckland City	02	Auckland Region	2.67507e+06	6.47084e+06	1	789100	9	1075	105	3
529800	105	517500	Kingsland	703	Eden-Albert Ward	7	Auckland City	02	Auckland Region	2.66604e+06	6.47969e+06	1	529800	10	1163	47	3
528000	111	517800	Mt Albert Central	703	Eden-Albert Ward	7	Auckland City	02	Auckland Region	2.66435e+06	6.47868e+06	1	528000	9	1095	50	3
2626400	126	594400	St Martins	6006	Spreydon-Heathcote Ward	60	Christchurch City	13	Canterbury Region	2.48228e+06	5.73846e+06	1	2626400	3	930	42	1
2625100	174	594400	St Martins	6006	Spreydon-Heathcote Ward	60	Christchurch City	13	Canterbury Region	2.48181e+06	5.73876e+06	1	2625100	3	920	57	1
527600	81	517800	Mt Albert Central	703	Eden-Albert Ward	7	Auckland City	02	Auckland Region	2.66362e+06	6.47844e+06	1	527600	6	983	28	2
2625500	93	594400	St Martins	6006	Spreydon-Heathcote Ward	60	Christchurch City	13	Canterbury Region	2.48214e+06	5.73845e+06	1	2625500	3	920	31	1
2624900	180	594400	St Martins	6006	Spreydon-Heathcote Ward	60	Christchurch City	13	Canterbury Region	2.48169e+06	5.739e+06	1	2624900	4	937	63	2
2626000	156	594400	St Martins	6006	Spreydon-Heathcote Ward	60	Christchurch City	13	Canterbury Region	2.48206e+06	5.73899e+06	1	2626000	3	932	51	1
265500	81	511303	Lynnmall	604	New Lynn Ward	6	Waitakere City	02	Auckland Region	2.66093e+06	6.47485e+06	1	265500	9	1097	36	3
529200	156	517500	Kingsland	703	Eden-Albert Ward	7	Auckland City	02	Auckland Region	2.66644e+06	6.48011e+06	1	529200	5	969	55	2
528800	102	517800	Mt Albert Central	703	Eden-Albert Ward	7	Auckland City	02	Auckland Region	2.66395e+06	6.47804e+06	1	528800	1	878	34	1
2625300	102	594400	St Martins	6006	Spreydon-Heathcote Ward	60	Christchurch City	13	Canterbury Region	2.48204e+06	5.73865e+06	1	2625300	3	920	34	1
2100400	165	574600	Wadestown	4703	Lambton Ward	47	Wellington City	09	Wellington Region	2.65792e+06	5.99218e+06	1	2100400	1	894	54	1
2625800	168	594400	St Martins	6006	Spreydon-Heathcote Ward	60	Christchurch City	13	Canterbury Region	2.48212e+06	5.73928e+06	1	2625800	5	966	59	2
528201	129	517800	Mt Albert Central	703	Eden-Albert Ward	7	Auckland City	02	Auckland Region	2.66441e+06	6.47857e+06	1	528201	7	1002	45	2
528400	162	517800	Mt Albert Central	703	Eden-Albert Ward	7	Auckland City	02	Auckland Region	2.66393e+06	6.47819e+06	1	528400	1	879	53	1
2625200	99	594400	St Martins	6006	Spreydon-Heathcote Ward	60	Christchurch City	13	Canterbury Region	2.4819e+06	5.73859e+06	1	2625200	6	988	35	2
2626200	117	594400	St Martins	6006	Spreydon-Heathcote Ward	60	Christchurch City	13	Canterbury Region	2.48233e+06	5.73887e+06	1	2626200	2	909	39	1
2625700	120	594400	St Martins	6006	Spreydon-Heathcote Ward	60	Christchurch City	13	Canterbury Region	2.48191e+06	5.7392e+06	1	2625700	7	1009	42	2
2625900	210	594400	St Martins	6006	Spreydon-Heathcote Ward	60	Christchurch City	13	Canterbury Region	2.48228e+06	5.73915e+06	1	2625900	3	921	69	1
528601	75	517800	Mt Albert Central	703	Eden-Albert Ward	7	Auckland City	02	Auckland Region	2.66414e+06	6.47827e+06	1	528601	3	934	25	1
528500	123	517800	Mt Albert Central	703	Eden-Albert Ward	7	Auckland City	02	Auckland Region	2.6638e+06	6.47804e+06	1	528500	3	934	41	1
2100800	75	574600	Wadestown	4703	Lambton Ward	47	Wellington City	09	Wellington Region	2.65807e+06	5.99243e+06	1	2100800	1	896	25	1
527800	102	517800	Mt Albert Central	703	Eden-Albert Ward	7	Auckland City	02	Auckland Region	2.66344e+06	6.47833e+06	1	527800	4	948	36	2
528202	171	517800	Mt Albert Central	703	Eden-Albert Ward	7	Auckland City	02	Auckland Region	2.66452e+06	6.47847e+06	1	528202	7	1019	60	2
527700	123	517800	Mt Albert Central	703	Eden-Albert Ward	7	Auckland City	02	Auckland Region	2.6638e+06	6.47831e+06	1	527700	2	912	41	1
528300	159	517800	Mt Albert Central	703	Eden-Albert Ward	7	Auckland City	02	Auckland Region	2.66407e+06	6.47835e+06	1	528300	3	931	52	1
528100	102	517800	Mt Albert Central	703	Eden-Albert Ward	7	Auckland City	02	Auckland Region	2.66421e+06	6.47858e+06	1	528100	4	941	36	2
265400	195	511303	Lynnmall	604	New Lynn Ward	6	Waitakere City	02	Auckland Region	2.66107e+06	6.47485e+06	1	265400	9	1136	88	3
266200	18	511303	Lynnmall	604	New Lynn Ward	6	Waitakere City	02	Auckland Region	2.66087e+06	6.47592e+06	1	266200	8	1058	8	3
529000	57	517500	Kingsland	703	Eden-Albert Ward	7	Auckland City	02	Auckland Region	2.66656e+06	6.48017e+06	1	529000	4	950	20	2
529300	135	517500	Kingsland	703	Eden-Albert Ward	7	Auckland City	02	Auckland Region	2.6663e+06	6.48003e+06	1	529300	7	1004	47	2
2359904	93	583300	Grampians	5299	Area Outside Ward	52	Nelson City	17	Nelson Region	2.53151e+06	5.98908e+06	1	2359904	2	904	31	1
529100	51	517500	Kingsland	703	Eden-Albert Ward	7	Auckland City	02	Auckland Region	2.6665e+06	6.48017e+06	1	529100	4	950	18	2
2626300	99	594400	St Martins	6006	Spreydon-Heathcote Ward	60	Christchurch City	13	Canterbury Region	2.48223e+06	5.73872e+06	1	2626300	8	1031	45	3
2626100	117	594400	St Martins	6006	Spreydon-Heathcote Ward	60	Christchurch City	13	Canterbury Region	2.48231e+06	5.73897e+06	1	2626100	4	947	41	2
372104	177	514600	Avondale South	702	Avondale-Roskill Ward	7	Auckland City	02	Auckland Region	2.66191e+06	6.4752e+06	1	372104	6	990	62	2
527900	162	517800	Mt Albert Central	703	Eden-Albert Ward	7	Auckland City	02	Auckland Region	2.66364e+06	6.47817e+06	1	527900	2	910	53	1
2625000	93	594400	St Martins	6006	Spreydon-Heathcote Ward	60	Christchurch City	13	Canterbury Region	2.48183e+06	5.73896e+06	1	2625000	6	988	33	2
2891300	174	603500	Woodhaugh	7103	Cargill Ward	71	Dunedin City	14	Otago Region	2.31668e+06	5.48059e+06	1	2891300	9	1105	78	3
529900	204	517500	Kingsland	703	Eden-Albert Ward	7	Auckland City	02	Auckland Region	2.66557e+06	6.4799e+06	1	529900	6	981	71	2
530500	153	517500	Kingsland	703	Eden-Albert Ward	7	Auckland City	02	Auckland Region	2.66579e+06	6.47967e+06	1	530500	4	943	54	2
531100	144	517500	Kingsland	703	Eden-Albert Ward	7	Auckland City	02	Auckland Region	2.66642e+06	6.47957e+06	1	531100	7	1001	50	2
530600	156	517500	Kingsland	703	Eden-Albert Ward	7	Auckland City	02	Auckland Region	2.66548e+06	6.47952e+06	1	530600	7	1020	55	2
529700	45	517500	Kingsland	703	Eden-Albert Ward	7	Auckland City	02	Auckland Region	2.66618e+06	6.47981e+06	1	529700	10	1163	20	3
530300	174	517500	Kingsland	703	Eden-Albert Ward	7	Auckland City	02	Auckland Region	2.66577e+06	6.47975e+06	1	530300	6	995	61	2
530900	12	517500	Kingsland	703	Eden-Albert Ward	7	Auckland City	02	Auckland Region	2.66641e+06	6.47986e+06	1	530900	5	953	4	2
1710300	162	557400	Upper Aramoho	3702	Urban Ward	37	Wanganui District	08	Manawatu-Wanganui Region	2.68688e+06	6.14339e+06	1	1710300	7	1021	57	2
529500	114	517500	Kingsland	703	Eden-Albert Ward	7	Auckland City	02	Auckland Region	2.66641e+06	6.47995e+06	1	529500	6	978	40	2
529600	93	517500	Kingsland	703	Eden-Albert Ward	7	Auckland City	02	Auckland Region	2.66622e+06	6.47993e+06	1	529600	4	950	33	2
1709900	111	557400	Upper Aramoho	3702	Urban Ward	37	Wanganui District	08	Manawatu-Wanganui Region	2.68673e+06	6.14309e+06	1	1709900	9	1096	50	3
530100	114	517500	Kingsland	703	Eden-Albert Ward	7	Auckland City	02	Auckland Region	2.66576e+06	6.47983e+06	1	530100	3	927	38	1
531000	51	517500	Kingsland	703	Eden-Albert Ward	7	Auckland City	02	Auckland Region	2.66646e+06	6.47976e+06	1	531000	8	1039	23	3
530200	183	517500	Kingsland	703	Eden-Albert Ward	7	Auckland City	02	Auckland Region	2.66546e+06	6.47972e+06	1	530200	7	1009	64	2
529400	6	517500	Kingsland	703	Eden-Albert Ward	7	Auckland City	02	Auckland Region	2.66665e+06	6.48005e+06	1	529400	6	978	2	2
661100	291	522201	Papatoetoe North	802	Papatoetoe Ward	8	Manukau City	02	Auckland Region	2.6756e+06	6.46873e+06	1	661100	7	1015	102	2
530400	132	517500	Kingsland	703	Eden-Albert Ward	7	Auckland City	02	Auckland Region	2.66549e+06	6.47962e+06	1	530400	7	1002	46	2
530000	168	517500	Kingsland	703	Eden-Albert Ward	7	Auckland City	02	Auckland Region	2.66547e+06	6.47981e+06	1	530000	3	926	55	1
2103700	33	574700	Wilton-Otari	4703	Lambton Ward	47	Wellington City	09	Wellington Region	2.65787e+06	5.99232e+06	1	2103700	1	885	11	1
1709700	114	557400	Upper Aramoho	3702	Urban Ward	37	Wanganui District	08	Manawatu-Wanganui Region	2.68683e+06	6.14322e+06	1	1709700	9	1078	51	3
2890401	132	603810	Glenleith	7104	Hills Ward	71	Dunedin City	14	Otago Region	2.31593e+06	5.48207e+06	1	2890401	4	950	46	2
530700	87	517500	Kingsland	703	Eden-Albert Ward	7	Auckland City	02	Auckland Region	2.66571e+06	6.47956e+06	1	530700	6	981	30	2
530800	48	517500	Kingsland	703	Eden-Albert Ward	7	Auckland City	02	Auckland Region	2.66587e+06	6.47962e+06	1	530800	3	927	16	1
402700	108	515410	Grey Lynn West	701	Western Bays Ward	7	Auckland City	02	Auckland Region	2.6654e+06	6.48145e+06	1	402700	4	940	38	2
402500	141	515410	Grey Lynn West	701	Western Bays Ward	7	Auckland City	02	Auckland Region	2.66492e+06	6.48122e+06	1	402500	4	940	49	2
403500	114	515410	Grey Lynn West	701	Western Bays Ward	7	Auckland City	02	Auckland Region	2.66502e+06	6.48116e+06	1	403500	5	956	40	2
534700	138	517600	St Lukes	703	Eden-Albert Ward	7	Auckland City	02	Auckland Region	2.66507e+06	6.47916e+06	1	534700	7	1013	48	2
1581000	84	551501	Lynmouth	3301	New Plymouth City Ward	33	New Plymouth District	07	Taranaki Region	2.6008e+06	6.23725e+06	1	1581000	5	969	29	2
1580900	72	551501	Lynmouth	3301	New Plymouth City Ward	33	New Plymouth District	07	Taranaki Region	2.6005e+06	6.23716e+06	1	1580900	5	969	25	2
438304	129	514103	Auckland Central East	704	Hobson Ward	7	Auckland City	02	Auckland Region	2.66857e+06	6.48215e+06	1	438304	9	1080	58	3
531800	18	517500	Kingsland	703	Eden-Albert Ward	7	Auckland City	02	Auckland Region	2.66582e+06	6.47955e+06	1	531800	8	1045	8	3
2630000	90	595300	Hillmorton	6006	Spreydon-Heathcote Ward	60	Christchurch City	13	Canterbury Region	2.4766e+06	5.73874e+06	1	2630000	6	982	31	2
2104902	90	574700	Wilton-Otari	4702	Onslow-Western Ward	47	Wellington City	09	Wellington Region	2.65764e+06	5.99262e+06	1	2104902	4	938	31	2
2105002	117	574700	Wilton-Otari	4702	Onslow-Western Ward	47	Wellington City	09	Wellington Region	2.65777e+06	5.9927e+06	1	2105002	5	967	41	2
532200	93	517500	Kingsland	703	Eden-Albert Ward	7	Auckland City	02	Auckland Region	2.6655e+06	6.47929e+06	1	532200	4	946	33	2
2629200	3	590300	Middleton	6006	Spreydon-Heathcote Ward	60	Christchurch City	13	Canterbury Region	2.47672e+06	5.73955e+06	1	2629200	4	942	1	2
2890700	144	603500	Woodhaugh	7104	Hills Ward	71	Dunedin City	14	Otago Region	2.31601e+06	5.48148e+06	1	2890700	6	993	50	2
532100	288	517500	Kingsland	703	Eden-Albert Ward	7	Auckland City	02	Auckland Region	2.66544e+06	6.47934e+06	1	532100	4	946	101	2
532700	114	517500	Kingsland	703	Eden-Albert Ward	7	Auckland City	02	Auckland Region	2.66522e+06	6.47909e+06	1	532700	3	929	38	1
438216	318	514101	Auckland Harbourside	704	Hobson Ward	7	Auckland City	02	Auckland Region	2.66871e+06	6.4821e+06	1	438216	7	1029	111	2
532000	93	517500	Kingsland	703	Eden-Albert Ward	7	Auckland City	02	Auckland Region	2.66542e+06	6.47943e+06	1	532000	8	1045	42	3
532600	141	517500	Kingsland	703	Eden-Albert Ward	7	Auckland City	02	Auckland Region	2.66546e+06	6.47918e+06	1	532600	3	929	47	1
2891202	36	603500	Woodhaugh	7103	Cargill Ward	71	Dunedin City	14	Otago Region	2.31674e+06	5.48066e+06	1	2891202	6	993	13	2
2890900	51	603500	Woodhaugh	7104	Hills Ward	71	Dunedin City	14	Otago Region	2.3163e+06	5.48131e+06	1	2890900	3	927	17	1
532800	99	517500	Kingsland	703	Eden-Albert Ward	7	Auckland City	02	Auckland Region	2.66548e+06	6.47908e+06	1	532800	4	950	35	2
138201	87	506615	Cape Rodney	401	Northern Ward	4	Rodney District	02	Auckland Region	2.66328e+06	6.54005e+06	1	138201	5	960	30	2
438104	33	514103	Auckland Central East	704	Hobson Ward	7	Auckland City	02	Auckland Region	2.66812e+06	6.48248e+06	1	438104	8	1060	15	3
532900	114	517500	Kingsland	703	Eden-Albert Ward	7	Auckland City	02	Auckland Region	2.66545e+06	6.47898e+06	1	532900	4	950	40	2
662400	6	522201	Papatoetoe North	802	Papatoetoe Ward	8	Manukau City	02	Auckland Region	2.67595e+06	6.46858e+06	1	662400	9	1079	3	3
1581100	42	551501	Lynmouth	3301	New Plymouth City Ward	33	New Plymouth District	07	Taranaki Region	2.60087e+06	6.23736e+06	1	1581100	5	973	15	2
2629300	165	595300	Hillmorton	6006	Spreydon-Heathcote Ward	60	Christchurch City	13	Canterbury Region	2.47685e+06	5.73901e+06	1	2629300	5	957	58	2
531900	87	517500	Kingsland	703	Eden-Albert Ward	7	Auckland City	02	Auckland Region	2.66565e+06	6.47949e+06	1	531900	8	1045	39	3
2105200	228	574700	Wilton-Otari	4702	Onslow-Western Ward	47	Wellington City	09	Wellington Region	2.65754e+06	5.99269e+06	1	2105200	3	931	75	1
531300	6	517500	Kingsland	703	Eden-Albert Ward	7	Auckland City	02	Auckland Region	2.66604e+06	6.47961e+06	1	531300	5	953	2	2
2759600	12	598312	Orari	6401	Geraldine Ward	64	Timaru District	13	Canterbury Region	2.36743e+06	5.67582e+06	1	2759600	3	932	4	1
438212	222	514101	Auckland Harbourside	704	Hobson Ward	7	Auckland City	02	Auckland Region	2.66835e+06	6.48252e+06	1	438212	7	1030	78	2
139700	51	506615	Cape Rodney	401	Northern Ward	4	Rodney District	02	Auckland Region	2.66295e+06	6.53652e+06	1	139700	3	923	17	1
2891100	69	603500	Woodhaugh	7104	Hills Ward	71	Dunedin City	14	Otago Region	2.31613e+06	5.48088e+06	1	2891100	3	924	23	1
2891000	180	603500	Woodhaugh	7104	Hills Ward	71	Dunedin City	14	Otago Region	2.31617e+06	5.48101e+06	1	2891000	7	1019	63	2
532300	108	517500	Kingsland	703	Eden-Albert Ward	7	Auckland City	02	Auckland Region	2.66603e+06	6.47934e+06	1	532300	6	997	38	2
1581200	48	551501	Lynmouth	3301	New Plymouth City Ward	33	New Plymouth District	07	Taranaki Region	2.60109e+06	6.23735e+06	1	1581200	5	973	17	2
2105100	102	574700	Wilton-Otari	4702	Onslow-Western Ward	47	Wellington City	09	Wellington Region	2.6578e+06	5.99257e+06	1	2105100	4	941	36	2
138102	135	506615	Cape Rodney	401	Northern Ward	4	Rodney District	02	Auckland Region	2.66438e+06	6.53735e+06	1	138102	3	927	45	1
139200	72	506615	Cape Rodney	401	Northern Ward	4	Rodney District	02	Auckland Region	2.66176e+06	6.53586e+06	1	139200	2	906	24	1
531200	156	517500	Kingsland	703	Eden-Albert Ward	7	Auckland City	02	Auckland Region	2.66622e+06	6.4796e+06	1	531200	8	1039	70	3
531400	165	517500	Kingsland	703	Eden-Albert Ward	7	Auckland City	02	Auckland Region	2.666e+06	6.47945e+06	1	531400	5	953	58	2
662300	240	522201	Papatoetoe North	802	Papatoetoe Ward	8	Manukau City	02	Auckland Region	2.67578e+06	6.46866e+06	1	662300	8	1056	108	3
1581300	93	551501	Lynmouth	3301	New Plymouth City Ward	33	New Plymouth District	07	Taranaki Region	2.60149e+06	6.2375e+06	1	1581300	6	988	33	2
2104800	78	574700	Wilton-Otari	4702	Onslow-Western Ward	47	Wellington City	09	Wellington Region	2.65775e+06	5.99317e+06	1	2104800	1	885	26	1
2891201	15	603500	Woodhaugh	7104	Hills Ward	71	Dunedin City	14	Otago Region	2.31636e+06	5.48086e+06	1	2891201	6	993	5	2
138203	69	506615	Cape Rodney	401	Northern Ward	4	Rodney District	02	Auckland Region	2.66441e+06	6.53766e+06	1	138203	3	927	23	1
665500	336	522202	Papatoetoe Central	802	Papatoetoe Ward	8	Manukau City	02	Auckland Region	2.67661e+06	6.46739e+06	1	665500	8	1066	151	3
1581700	93	551501	Lynmouth	3301	New Plymouth City Ward	33	New Plymouth District	07	Taranaki Region	2.60117e+06	6.23724e+06	1	1581700	5	958	33	2
2631200	201	595300	Hillmorton	6006	Spreydon-Heathcote Ward	60	Christchurch City	13	Canterbury Region	2.47687e+06	5.73822e+06	1	2631200	10	1163	90	3
1582400	135	551501	Lynmouth	3301	New Plymouth City Ward	33	New Plymouth District	07	Taranaki Region	2.60086e+06	6.23709e+06	1	1582400	9	1133	61	3
2631300	174	595300	Hillmorton	6006	Spreydon-Heathcote Ward	60	Christchurch City	13	Canterbury Region	2.47687e+06	5.7388e+06	1	2631300	8	1039	78	3
402400	159	515410	Grey Lynn West	701	Western Bays Ward	7	Auckland City	02	Auckland Region	2.66486e+06	6.48129e+06	1	402400	1	893	52	1
2762800	168	598500	Geraldine	6401	Geraldine Ward	64	Timaru District	13	Canterbury Region	2.36963e+06	5.67856e+06	1	2762800	4	950	59	2
2762700	111	598500	Geraldine	6401	Geraldine Ward	64	Timaru District	13	Canterbury Region	2.36976e+06	5.67889e+06	1	2762700	7	1009	39	2
2448212	42	586305	Kingsbury	5903	Rangiora Ward	59	Waimakariri District	13	Canterbury Region	2.47623e+06	5.76793e+06	1	2448212	2	901	14	1
665400	261	522202	Papatoetoe Central	802	Papatoetoe Ward	8	Manukau City	02	Auckland Region	2.67674e+06	6.46763e+06	1	665400	8	1040	117	3
2631700	198	595300	Hillmorton	6006	Spreydon-Heathcote Ward	60	Christchurch City	13	Canterbury Region	2.47712e+06	5.73898e+06	1	2631700	6	987	69	2
402600	123	515410	Grey Lynn West	701	Western Bays Ward	7	Auckland City	02	Auckland Region	2.66525e+06	6.48141e+06	1	402600	2	917	41	1
613200	144	520202	Ellerslie South	706	Tamaki-Maungakiekie Ward	7	Auckland City	02	Auckland Region	2.67094e+06	6.47704e+06	1	613200	3	929	48	1
2630600	228	595300	Hillmorton	6006	Spreydon-Heathcote Ward	60	Christchurch City	13	Canterbury Region	2.47662e+06	5.73823e+06	1	2630600	7	1027	80	2
2631400	159	595300	Hillmorton	6006	Spreydon-Heathcote Ward	60	Christchurch City	13	Canterbury Region	2.47684e+06	5.73857e+06	1	2631400	10	1180	72	3
665602	126	522202	Papatoetoe Central	802	Papatoetoe Ward	8	Manukau City	02	Auckland Region	2.67688e+06	6.46744e+06	1	665602	9	1095	57	3
2631100	60	595300	Hillmorton	6006	Spreydon-Heathcote Ward	60	Christchurch City	13	Canterbury Region	2.4769e+06	5.73832e+06	1	2631100	10	1193	27	3
533502	78	517600	St Lukes	703	Eden-Albert Ward	7	Auckland City	02	Auckland Region	2.66527e+06	6.47993e+06	1	533502	5	959	27	2
2630200	87	595300	Hillmorton	6006	Spreydon-Heathcote Ward	60	Christchurch City	13	Canterbury Region	2.4764e+06	5.73858e+06	1	2630200	6	982	30	2
2630400	204	595300	Hillmorton	6006	Spreydon-Heathcote Ward	60	Christchurch City	13	Canterbury Region	2.47647e+06	5.7385e+06	1	2630400	6	996	71	2
403400	114	515410	Grey Lynn West	701	Western Bays Ward	7	Auckland City	02	Auckland Region	2.66499e+06	6.48122e+06	1	403400	3	927	38	1
2761800	30	598312	Orari	6401	Geraldine Ward	64	Timaru District	13	Canterbury Region	2.37037e+06	5.68133e+06	1	2761800	1	870	10	1
403600	195	515410	Grey Lynn West	701	Western Bays Ward	7	Auckland City	02	Auckland Region	2.66512e+06	6.48112e+06	1	403600	6	981	68	2
665601	45	522202	Papatoetoe Central	802	Papatoetoe Ward	8	Manukau City	02	Auckland Region	2.67674e+06	6.46744e+06	1	665601	9	1095	20	3
665300	300	522202	Papatoetoe Central	802	Papatoetoe Ward	8	Manukau City	02	Auckland Region	2.67646e+06	6.4676e+06	1	665300	8	1052	135	3
534500	186	517600	St Lukes	703	Eden-Albert Ward	7	Auckland City	02	Auckland Region	2.66479e+06	6.47928e+06	1	534500	6	975	65	2
1582500	69	551501	Lynmouth	3301	New Plymouth City Ward	33	New Plymouth District	07	Taranaki Region	2.6003e+06	6.23707e+06	1	1582500	8	1072	31	3
2630700	141	595300	Hillmorton	6006	Spreydon-Heathcote Ward	60	Christchurch City	13	Canterbury Region	2.47646e+06	5.73814e+06	1	2630700	9	1097	63	3
2631600	102	595300	Hillmorton	6006	Spreydon-Heathcote Ward	60	Christchurch City	13	Canterbury Region	2.47717e+06	5.73846e+06	1	2631600	4	942	36	2
403000	114	515431	Surrey Crescent	701	Western Bays Ward	7	Auckland City	02	Auckland Region	2.66464e+06	6.48095e+06	1	403000	2	911	38	1
403200	156	515431	Surrey Crescent	701	Western Bays Ward	7	Auckland City	02	Auckland Region	2.66461e+06	6.48074e+06	1	403200	2	914	51	1
534602	9	517600	St Lukes	703	Eden-Albert Ward	7	Auckland City	02	Auckland Region	2.66505e+06	6.47932e+06	1	534602	2	908	3	1
665101	150	522202	Papatoetoe Central	802	Papatoetoe Ward	8	Manukau City	02	Auckland Region	2.67638e+06	6.46795e+06	1	665101	8	1070	68	3
1583202	42	551501	Lynmouth	3301	New Plymouth City Ward	33	New Plymouth District	07	Taranaki Region	2.60072e+06	6.237e+06	1	1583202	10	1196	19	3
1583100	132	551501	Lynmouth	3301	New Plymouth City Ward	33	New Plymouth District	07	Taranaki Region	2.60054e+06	6.23694e+06	1	1583100	5	964	46	2
2630500	168	595300	Hillmorton	6006	Spreydon-Heathcote Ward	60	Christchurch City	13	Canterbury Region	2.47638e+06	5.73834e+06	1	2630500	6	995	59	2
2120600	66	572900	Thorndon-Tinakori Road	4703	Lambton Ward	47	Wellington City	09	Wellington Region	2.65883e+06	5.99129e+06	1	2120600	3	934	22	1
2631000	123	595300	Hillmorton	6006	Spreydon-Heathcote Ward	60	Christchurch City	13	Canterbury Region	2.4768e+06	5.7384e+06	1	2631000	10	1193	55	3
533100	180	517600	St Lukes	703	Eden-Albert Ward	7	Auckland City	02	Auckland Region	2.66502e+06	6.47989e+06	1	533100	6	977	63	2
2631800	96	595300	Hillmorton	6006	Spreydon-Heathcote Ward	60	Christchurch City	13	Canterbury Region	2.47739e+06	5.73904e+06	1	2631800	5	955	34	2
2645000	81	595000	Spreydon	6006	Spreydon-Heathcote Ward	60	Christchurch City	13	Canterbury Region	2.48005e+06	5.73939e+06	1	2645000	7	1027	28	2
2630800	219	595300	Hillmorton	6006	Spreydon-Heathcote Ward	60	Christchurch City	13	Canterbury Region	2.47652e+06	5.738e+06	1	2630800	9	1135	99	3
403100	156	515431	Surrey Crescent	701	Western Bays Ward	7	Auckland City	02	Auckland Region	2.66474e+06	6.48091e+06	1	403100	3	928	51	1
533700	90	517600	St Lukes	703	Eden-Albert Ward	7	Auckland City	02	Auckland Region	2.66523e+06	6.47946e+06	1	533700	5	959	31	2
534400	198	517600	St Lukes	703	Eden-Albert Ward	7	Auckland City	02	Auckland Region	2.66447e+06	6.47904e+06	1	534400	7	1000	69	2
2631500	129	595300	Hillmorton	6006	Spreydon-Heathcote Ward	60	Christchurch City	13	Canterbury Region	2.47704e+06	5.73857e+06	1	2631500	6	993	45	2
405900	57	515431	Surrey Crescent	701	Western Bays Ward	7	Auckland City	02	Auckland Region	2.66494e+06	6.48042e+06	1	405900	8	1050	26	3
2765000	75	598500	Geraldine	6401	Geraldine Ward	64	Timaru District	13	Canterbury Region	2.36937e+06	5.6765e+06	1	2765000	4	947	26	2
668901	99	522302	Papatoetoe East	802	Papatoetoe Ward	8	Manukau City	02	Auckland Region	2.67679e+06	6.46806e+06	1	668901	8	1067	45	3
406400	222	515431	Surrey Crescent	701	Western Bays Ward	7	Auckland City	02	Auckland Region	2.66496e+06	6.48024e+06	1	406400	9	1093	100	3
667400	123	522301	Dingwall	802	Papatoetoe Ward	8	Manukau City	02	Auckland Region	2.67638e+06	6.46822e+06	1	667400	7	1027	43	2
404000	150	515431	Surrey Crescent	701	Western Bays Ward	7	Auckland City	02	Auckland Region	2.66482e+06	6.48082e+06	1	404000	4	951	52	2
666301	30	522301	Dingwall	802	Papatoetoe Ward	8	Manukau City	02	Auckland Region	2.67616e+06	6.46887e+06	1	666301	7	1002	10	2
665800	111	522301	Dingwall	802	Papatoetoe Ward	8	Manukau City	02	Auckland Region	2.67566e+06	6.46907e+06	1	665800	6	991	39	2
535100	165	517600	St Lukes	703	Eden-Albert Ward	7	Auckland City	02	Auckland Region	2.66468e+06	6.47881e+06	1	535100	6	990	58	2
2633300	81	595100	Hoon Hay	6006	Spreydon-Heathcote Ward	60	Christchurch City	13	Canterbury Region	2.47784e+06	5.73855e+06	1	2633300	5	962	28	2
2632900	120	595100	Hoon Hay	6006	Spreydon-Heathcote Ward	60	Christchurch City	13	Canterbury Region	2.47749e+06	5.73853e+06	1	2632900	6	996	42	2
2631900	231	595300	Hillmorton	6006	Spreydon-Heathcote Ward	60	Christchurch City	13	Canterbury Region	2.4774e+06	5.7387e+06	1	2631900	5	960	81	2
535700	162	517701	Sandringham North	703	Eden-Albert Ward	7	Auckland City	02	Auckland Region	2.66537e+06	6.4789e+06	1	535700	3	933	53	1
2895600	12	602900	Fernhill	7103	Cargill Ward	71	Dunedin City	14	Otago Region	2.31603e+06	5.47789e+06	1	2895600	7	1024	4	2
2895000	6	602800	Harbourside	7103	Cargill Ward	71	Dunedin City	14	Otago Region	2.31626e+06	5.47744e+06	1	2895000	9	1096	3	3
404800	24	515420	Grey Lynn East	701	Western Bays Ward	7	Auckland City	02	Auckland Region	2.66549e+06	6.48022e+06	1	404800	5	969	8	2
535300	123	517600	St Lukes	703	Eden-Albert Ward	7	Auckland City	02	Auckland Region	2.66475e+06	6.47861e+06	1	535300	5	966	43	2
405100	99	515431	Surrey Crescent	701	Western Bays Ward	7	Auckland City	02	Auckland Region	2.66474e+06	6.48054e+06	1	405100	8	1040	45	3
1583400	123	551502	Spotswood	3301	New Plymouth City Ward	33	New Plymouth District	07	Taranaki Region	2.60008e+06	6.23705e+06	1	1583400	6	987	43	2
2633200	126	595100	Hoon Hay	6006	Spreydon-Heathcote Ward	60	Christchurch City	13	Canterbury Region	2.47756e+06	5.73841e+06	1	2633200	6	992	44	2
2895500	18	602900	Fernhill	7103	Cargill Ward	71	Dunedin City	14	Otago Region	2.31587e+06	5.47786e+06	1	2895500	7	1024	6	2
534900	75	517600	St Lukes	703	Eden-Albert Ward	7	Auckland City	02	Auckland Region	2.66456e+06	6.4789e+06	1	534900	7	1010	26	2
2763500	114	598500	Geraldine	6401	Geraldine Ward	64	Timaru District	13	Canterbury Region	2.36922e+06	5.67853e+06	1	2763500	3	929	38	1
2763000	111	598500	Geraldine	6401	Geraldine Ward	64	Timaru District	13	Canterbury Region	2.36957e+06	5.67878e+06	1	2763000	6	981	39	2
2763600	81	598500	Geraldine	6401	Geraldine Ward	64	Timaru District	13	Canterbury Region	2.36905e+06	5.67813e+06	1	2763600	7	1022	28	2
666800	30	522301	Dingwall	802	Papatoetoe Ward	8	Manukau City	02	Auckland Region	2.67612e+06	6.46869e+06	1	666800	9	1096	14	3
666302	114	522301	Dingwall	802	Papatoetoe Ward	8	Manukau City	02	Auckland Region	2.67609e+06	6.46901e+06	1	666302	7	1002	40	2
2632600	126	595100	Hoon Hay	6006	Spreydon-Heathcote Ward	60	Christchurch City	13	Canterbury Region	2.47753e+06	5.73794e+06	1	2632600	4	947	44	2
404600	108	515410	Grey Lynn West	701	Western Bays Ward	7	Auckland City	02	Auckland Region	2.66545e+06	6.4806e+06	1	404600	7	1022	38	2
2763800	36	598500	Geraldine	6401	Geraldine Ward	64	Timaru District	13	Canterbury Region	2.36925e+06	5.67807e+06	1	2763800	7	1022	13	2
2763700	33	598500	Geraldine	6401	Geraldine Ward	64	Timaru District	13	Canterbury Region	2.36892e+06	5.67798e+06	1	2763700	7	1022	12	2
2764000	42	598500	Geraldine	6401	Geraldine Ward	64	Timaru District	13	Canterbury Region	2.36946e+06	5.6779e+06	1	2764000	5	961	15	2
666900	120	522301	Dingwall	802	Papatoetoe Ward	8	Manukau City	02	Auckland Region	2.67625e+06	6.4686e+06	1	666900	9	1096	54	3
2632500	87	595100	Hoon Hay	6006	Spreydon-Heathcote Ward	60	Christchurch City	13	Canterbury Region	2.47747e+06	5.73791e+06	1	2632500	4	947	30	2
2633000	141	595100	Hoon Hay	6006	Spreydon-Heathcote Ward	60	Christchurch City	13	Canterbury Region	2.47769e+06	5.73866e+06	1	2633000	4	952	49	2
403800	84	515410	Grey Lynn West	701	Western Bays Ward	7	Auckland City	02	Auckland Region	2.66511e+06	6.48097e+06	1	403800	4	936	29	2
2764400	33	598500	Geraldine	6401	Geraldine Ward	64	Timaru District	13	Canterbury Region	2.3687e+06	5.67729e+06	1	2764400	8	1068	15	3
536000	72	517701	Sandringham North	703	Eden-Albert Ward	7	Auckland City	02	Auckland Region	2.66498e+06	6.47863e+06	1	536000	7	1011	25	2
535600	285	517701	Sandringham North	703	Eden-Albert Ward	7	Auckland City	02	Auckland Region	2.66511e+06	6.47883e+06	1	535600	7	1011	100	2
535400	126	517600	St Lukes	703	Eden-Albert Ward	7	Auckland City	02	Auckland Region	2.66488e+06	6.47874e+06	1	535400	6	997	44	2
666200	105	522301	Dingwall	802	Papatoetoe Ward	8	Manukau City	02	Auckland Region	2.67598e+06	6.46887e+06	1	666200	8	1032	47	3
2633500	147	595100	Hoon Hay	6006	Spreydon-Heathcote Ward	60	Christchurch City	13	Canterbury Region	2.4777e+06	5.73818e+06	1	2633500	4	951	51	2
404500	90	515410	Grey Lynn West	701	Western Bays Ward	7	Auckland City	02	Auckland Region	2.66536e+06	6.48052e+06	1	404500	5	969	31	2
666000	69	522301	Dingwall	802	Papatoetoe Ward	8	Manukau City	02	Auckland Region	2.67591e+06	6.46917e+06	1	666000	7	1002	24	2
403700	81	515410	Grey Lynn West	701	Western Bays Ward	7	Auckland City	02	Auckland Region	2.66521e+06	6.48098e+06	1	403700	5	956	28	2
665900	117	522301	Dingwall	802	Papatoetoe Ward	8	Manukau City	02	Auckland Region	2.67565e+06	6.46927e+06	1	665900	8	1041	53	3
2632100	54	595300	Hillmorton	6006	Spreydon-Heathcote Ward	60	Christchurch City	13	Canterbury Region	2.47699e+06	5.73808e+06	1	2632100	5	955	19	2
403900	123	515410	Grey Lynn West	701	Western Bays Ward	7	Auckland City	02	Auckland Region	2.66498e+06	6.48096e+06	1	403900	4	936	43	2
404200	114	515410	Grey Lynn West	701	Western Bays Ward	7	Auckland City	02	Auckland Region	2.66513e+06	6.4808e+06	1	404200	5	969	40	2
666100	228	522301	Dingwall	802	Papatoetoe Ward	8	Manukau City	02	Auckland Region	2.67584e+06	6.46906e+06	1	666100	7	1018	80	2
535000	117	517600	St Lukes	703	Eden-Albert Ward	7	Auckland City	02	Auckland Region	2.66449e+06	6.47877e+06	1	535000	8	1048	53	3
2633400	168	595100	Hoon Hay	6006	Spreydon-Heathcote Ward	60	Christchurch City	13	Canterbury Region	2.47768e+06	5.73835e+06	1	2633400	5	966	59	2
2632000	12	595300	Hillmorton	6006	Spreydon-Heathcote Ward	60	Christchurch City	13	Canterbury Region	2.47767e+06	5.73884e+06	1	2632000	6	987	4	2
2633100	132	595100	Hoon Hay	6006	Spreydon-Heathcote Ward	60	Christchurch City	13	Canterbury Region	2.47789e+06	5.7387e+06	1	2633100	2	914	44	1
535200	480	517600	St Lukes	703	Eden-Albert Ward	7	Auckland City	02	Auckland Region	2.66462e+06	6.47853e+06	1	535200	7	1005	168	2
404100	63	515410	Grey Lynn West	701	Western Bays Ward	7	Auckland City	02	Auckland Region	2.66499e+06	6.48081e+06	1	404100	5	969	22	2
404400	90	515410	Grey Lynn West	701	Western Bays Ward	7	Auckland City	02	Auckland Region	2.66526e+06	6.48067e+06	1	404400	5	966	31	2
666400	99	522301	Dingwall	802	Papatoetoe Ward	8	Manukau City	02	Auckland Region	2.67634e+06	6.46897e+06	1	666400	8	1032	45	3
404700	45	515420	Grey Lynn East	701	Western Bays Ward	7	Auckland City	02	Auckland Region	2.66539e+06	6.48031e+06	1	404700	6	979	16	2
2632202	117	595300	Hillmorton	6006	Spreydon-Heathcote Ward	60	Christchurch City	13	Canterbury Region	2.4768e+06	5.73803e+06	1	2632202	7	1027	41	2
2632800	27	595100	Hoon Hay	6006	Spreydon-Heathcote Ward	60	Christchurch City	13	Canterbury Region	2.47737e+06	5.73843e+06	1	2632800	5	962	9	2
2632400	90	595100	Hoon Hay	6006	Spreydon-Heathcote Ward	60	Christchurch City	13	Canterbury Region	2.47737e+06	5.73819e+06	1	2632400	6	986	31	2
2120800	87	572900	Thorndon-Tinakori Road	4703	Lambton Ward	47	Wellington City	09	Wellington Region	2.65878e+06	5.99119e+06	1	2120800	3	934	29	1
2894800	27	602800	Harbourside	7103	Cargill Ward	71	Dunedin City	14	Otago Region	2.31657e+06	5.47819e+06	1	2894800	9	1096	12	3
2895300	24	602900	Fernhill	7103	Cargill Ward	71	Dunedin City	14	Otago Region	2.31616e+06	5.4781e+06	1	2895300	7	1024	8	2
404300	87	515410	Grey Lynn West	701	Western Bays Ward	7	Auckland City	02	Auckland Region	2.66522e+06	6.48082e+06	1	404300	5	966	30	2
2764500	69	598500	Geraldine	6401	Geraldine Ward	64	Timaru District	13	Canterbury Region	2.3692e+06	5.67753e+06	1	2764500	7	1008	24	2
2764200	78	598500	Geraldine	6401	Geraldine Ward	64	Timaru District	13	Canterbury Region	2.36898e+06	5.67778e+06	1	2764200	8	1068	35	3
2764300	36	598500	Geraldine	6401	Geraldine Ward	64	Timaru District	13	Canterbury Region	2.36907e+06	5.67772e+06	1	2764300	8	1068	16	3
2764100	153	598500	Geraldine	6401	Geraldine Ward	64	Timaru District	13	Canterbury Region	2.36876e+06	5.67767e+06	1	2764100	3	934	50	1
2763900	45	598500	Geraldine	6401	Geraldine Ward	64	Timaru District	13	Canterbury Region	2.36927e+06	5.67795e+06	1	2763900	5	961	16	2
667300	174	522301	Dingwall	802	Papatoetoe Ward	8	Manukau City	02	Auckland Region	2.67652e+06	6.46834e+06	1	667300	6	996	61	2
534800	57	517600	St Lukes	703	Eden-Albert Ward	7	Auckland City	02	Auckland Region	2.66484e+06	6.47902e+06	1	534800	7	1010	20	2
1203300	9	536821	Omanu	2301	Mount Maunganui-Papamoa Ward	23	Tauranga City	04	Bay of Plenty Region	2.79181e+06	6.3893e+06	1	1203300	9	1110	4	3
2895400	108	602900	Fernhill	7103	Cargill Ward	71	Dunedin City	14	Otago Region	2.31597e+06	5.47805e+06	1	2895400	7	1003	38	2
670600	171	522302	Papatoetoe East	802	Papatoetoe Ward	8	Manukau City	02	Auckland Region	2.67739e+06	6.46747e+06	1	670600	8	1064	77	3
667601	162	522301	Dingwall	802	Papatoetoe Ward	8	Manukau City	02	Auckland Region	2.67641e+06	6.46852e+06	1	667601	9	1073	73	3
2635700	27	595200	Hoon Hay South	6006	Spreydon-Heathcote Ward	60	Christchurch City	13	Canterbury Region	2.47901e+06	5.73694e+06	1	2635700	3	931	9	1
2635500	123	595200	Hoon Hay South	6006	Spreydon-Heathcote Ward	60	Christchurch City	13	Canterbury Region	2.47873e+06	5.7373e+06	1	2635500	3	927	41	1
2635801	33	595200	Hoon Hay South	6006	Spreydon-Heathcote Ward	60	Christchurch City	13	Canterbury Region	2.47835e+06	5.7375e+06	1	2635801	4	936	12	2
2635000	45	595200	Hoon Hay South	6006	Spreydon-Heathcote Ward	60	Christchurch City	13	Canterbury Region	2.47825e+06	5.73789e+06	1	2635000	3	932	15	1
2633900	87	595100	Hoon Hay	6006	Spreydon-Heathcote Ward	60	Christchurch City	13	Canterbury Region	2.47796e+06	5.73826e+06	1	2633900	3	920	29	1
2896400	114	602900	Fernhill	7103	Cargill Ward	71	Dunedin City	14	Otago Region	2.31552e+06	5.47736e+06	1	2896400	10	1202	51	3
406100	129	515431	Surrey Crescent	701	Western Bays Ward	7	Auckland City	02	Auckland Region	2.66475e+06	6.48018e+06	1	406100	10	1540	58	3
406000	153	515431	Surrey Crescent	701	Western Bays Ward	7	Auckland City	02	Auckland Region	2.66485e+06	6.48029e+06	1	406000	10	1246	69	3
2633800	138	595100	Hoon Hay	6006	Spreydon-Heathcote Ward	60	Christchurch City	13	Canterbury Region	2.47774e+06	5.73802e+06	1	2633800	2	910	46	1
2896900	60	602900	Fernhill	7103	Cargill Ward	71	Dunedin City	14	Otago Region	2.31575e+06	5.47784e+06	1	2896900	7	1000	21	2
406700	66	515431	Surrey Crescent	701	Western Bays Ward	7	Auckland City	02	Auckland Region	2.66502e+06	6.48011e+06	1	406700	5	966	23	2
2896600	87	602900	Fernhill	7103	Cargill Ward	71	Dunedin City	14	Otago Region	2.31548e+06	5.47716e+06	1	2896600	9	1134	39	3
668902	54	522302	Papatoetoe East	802	Papatoetoe Ward	8	Manukau City	02	Auckland Region	2.6767e+06	6.46788e+06	1	668902	8	1067	24	3
668700	264	522302	Papatoetoe East	802	Papatoetoe Ward	8	Manukau City	02	Auckland Region	2.67652e+06	6.46809e+06	1	668700	9	1133	119	3
668801	114	522302	Papatoetoe East	802	Papatoetoe Ward	8	Manukau City	02	Auckland Region	2.67667e+06	6.46806e+06	1	668801	8	1039	51	3
1586400	132	551400	Moturoa	3301	New Plymouth City Ward	33	New Plymouth District	07	Taranaki Region	2.60019e+06	6.23736e+06	1	1586400	7	1008	46	2
406300	9	515431	Surrey Crescent	701	Western Bays Ward	7	Auckland City	02	Auckland Region	2.66466e+06	6.48012e+06	1	406300	8	1040	4	3
406502	63	515431	Surrey Crescent	701	Western Bays Ward	7	Auckland City	02	Auckland Region	2.66516e+06	6.48017e+06	1	406502	5	966	22	2
2764900	201	598500	Geraldine	6401	Geraldine Ward	64	Timaru District	13	Canterbury Region	2.36912e+06	5.67688e+06	1	2764900	6	982	70	2
2764700	150	598500	Geraldine	6401	Geraldine Ward	64	Timaru District	13	Canterbury Region	2.36907e+06	5.67717e+06	1	2764700	5	963	52	2
406800	87	515420	Grey Lynn East	701	Western Bays Ward	7	Auckland City	02	Auckland Region	2.66563e+06	6.48052e+06	1	406800	6	985	30	2
667602	21	522301	Dingwall	802	Papatoetoe Ward	8	Manukau City	02	Auckland Region	2.67631e+06	6.46836e+06	1	667602	9	1073	9	3
1586500	63	551400	Moturoa	3301	New Plymouth City Ward	33	New Plymouth District	07	Taranaki Region	2.60034e+06	6.2374e+06	1	1586500	7	1003	22	2
2634500	150	595100	Hoon Hay	6006	Spreydon-Heathcote Ward	60	Christchurch City	13	Canterbury Region	2.47857e+06	5.73824e+06	1	2634500	5	967	52	2
2896700	108	602900	Fernhill	7103	Cargill Ward	71	Dunedin City	14	Otago Region	2.31574e+06	5.478e+06	1	2896700	9	1099	49	3
2765100	69	598500	Geraldine	6401	Geraldine Ward	64	Timaru District	13	Canterbury Region	2.36952e+06	5.67614e+06	1	2765100	4	947	24	2
1586202	18	551400	Moturoa	3301	New Plymouth City Ward	33	New Plymouth District	07	Taranaki Region	2.60007e+06	6.23724e+06	1	1586202	7	1003	6	2
2634800	123	595100	Hoon Hay	6006	Spreydon-Heathcote Ward	60	Christchurch City	13	Canterbury Region	2.47811e+06	5.73809e+06	1	2634800	6	994	43	2
2634400	138	595100	Hoon Hay	6006	Spreydon-Heathcote Ward	60	Christchurch City	13	Canterbury Region	2.47844e+06	5.73817e+06	1	2634400	6	983	48	2
2896300	159	602900	Fernhill	7103	Cargill Ward	71	Dunedin City	14	Otago Region	2.3154e+06	5.47735e+06	1	2896300	10	1140	72	3
2634900	33	595100	Hoon Hay	6006	Spreydon-Heathcote Ward	60	Christchurch City	13	Canterbury Region	2.47833e+06	5.73807e+06	1	2634900	6	994	12	2
2633700	126	595100	Hoon Hay	6006	Spreydon-Heathcote Ward	60	Christchurch City	13	Canterbury Region	2.47809e+06	5.73837e+06	1	2633700	6	994	44	2
2895700	18	602900	Fernhill	7103	Cargill Ward	71	Dunedin City	14	Otago Region	2.31584e+06	5.4777e+06	1	2895700	7	1024	6	2
2897100	114	602900	Fernhill	7103	Cargill Ward	71	Dunedin City	14	Otago Region	2.31556e+06	5.47777e+06	1	2897100	8	1048	51	3
668802	33	522302	Papatoetoe East	802	Papatoetoe Ward	8	Manukau City	02	Auckland Region	2.67653e+06	6.46791e+06	1	668802	8	1039	15	3
667500	123	522301	Dingwall	802	Papatoetoe Ward	8	Manukau City	02	Auckland Region	2.67624e+06	6.46843e+06	1	667500	10	1143	55	3
1586300	12	551400	Moturoa	3301	New Plymouth City Ward	33	New Plymouth District	07	Taranaki Region	2.60004e+06	6.23762e+06	1	1586300	7	1003	4	2
406201	36	515431	Surrey Crescent	701	Western Bays Ward	7	Auckland City	02	Auckland Region	2.66476e+06	6.48011e+06	1	406201	8	1040	16	3
2633600	81	595100	Hoon Hay	6006	Spreydon-Heathcote Ward	60	Christchurch City	13	Canterbury Region	2.47773e+06	5.73829e+06	1	2633600	3	920	27	1
2764600	39	598500	Geraldine	6401	Geraldine Ward	64	Timaru District	13	Canterbury Region	2.36891e+06	5.6775e+06	1	2764600	7	1008	14	2
2764800	123	598500	Geraldine	6401	Geraldine Ward	64	Timaru District	13	Canterbury Region	2.3695e+06	5.67679e+06	1	2764800	5	966	43	2
405300	156	515431	Surrey Crescent	701	Western Bays Ward	7	Auckland City	02	Auckland Region	2.66498e+06	6.4805e+06	1	405300	6	977	55	2
536400	114	517701	Sandringham North	703	Eden-Albert Ward	7	Auckland City	02	Auckland Region	2.66534e+06	6.47881e+06	1	536400	4	939	40	2
406600	162	515431	Surrey Crescent	701	Western Bays Ward	7	Auckland City	02	Auckland Region	2.66521e+06	6.48033e+06	1	406600	7	1015	57	2
668400	204	522302	Papatoetoe East	802	Papatoetoe Ward	8	Manukau City	02	Auckland Region	2.67668e+06	6.46832e+06	1	668400	9	1100	92	3
1586201	39	551400	Moturoa	3301	New Plymouth City Ward	33	New Plymouth District	07	Taranaki Region	2.59999e+06	6.23741e+06	1	1586201	7	1003	14	2
405800	117	515431	Surrey Crescent	701	Western Bays Ward	7	Auckland City	02	Auckland Region	2.66515e+06	6.48045e+06	1	405800	8	1050	53	3
406501	78	515431	Surrey Crescent	701	Western Bays Ward	7	Auckland City	02	Auckland Region	2.66515e+06	6.48028e+06	1	406501	5	966	27	2
541400	156	517702	Sandringham West	703	Eden-Albert Ward	7	Auckland City	02	Auckland Region	2.66494e+06	6.47715e+06	1	541400	8	1039	70	3
409900	51	515420	Grey Lynn East	701	Western Bays Ward	7	Auckland City	02	Auckland Region	2.66605e+06	6.48047e+06	1	409900	4	941	18	2
2635802	120	595200	Hoon Hay South	6006	Spreydon-Heathcote Ward	60	Christchurch City	13	Canterbury Region	2.47838e+06	5.73735e+06	1	2635802	4	936	42	2
1587200	120	551400	Moturoa	3301	New Plymouth City Ward	33	New Plymouth District	07	Taranaki Region	2.60106e+06	6.23773e+06	1	1587200	5	966	42	2
1587600	36	551400	Moturoa	3301	New Plymouth City Ward	33	New Plymouth District	07	Taranaki Region	2.60134e+06	6.2378e+06	1	1587600	8	1049	16	3
1194600	87	536810	Mt Maunganui North	2301	Mount Maunganui-Papamoa Ward	23	Tauranga City	04	Bay of Plenty Region	2.79075e+06	6.3915e+06	1	1194600	5	968	30	2
1194800	72	536810	Mt Maunganui North	2301	Mount Maunganui-Papamoa Ward	23	Tauranga City	04	Bay of Plenty Region	2.79084e+06	6.39141e+06	1	1194800	5	968	25	2
539500	36	517703	Sandringham East	703	Eden-Albert Ward	7	Auckland City	02	Auckland Region	2.66533e+06	6.47683e+06	1	539500	6	991	13	2
408000	66	515410	Grey Lynn West	701	Western Bays Ward	7	Auckland City	02	Auckland Region	2.66537e+06	6.4807e+06	1	408000	6	985	23	2
1194200	24	536810	Mt Maunganui North	2301	Mount Maunganui-Papamoa Ward	23	Tauranga City	04	Bay of Plenty Region	2.79057e+06	6.39181e+06	1	1194200	4	948	8	2
2636500	162	595200	Hoon Hay South	6006	Spreydon-Heathcote Ward	60	Christchurch City	13	Canterbury Region	2.47876e+06	5.73673e+06	1	2636500	3	926	53	1
2635100	102	595200	Hoon Hay South	6006	Spreydon-Heathcote Ward	60	Christchurch City	13	Canterbury Region	2.47834e+06	5.73773e+06	1	2635100	4	950	36	2
1587501	81	551400	Moturoa	3301	New Plymouth City Ward	33	New Plymouth District	07	Taranaki Region	2.6014e+06	6.23768e+06	1	1587501	8	1049	36	3
1586900	162	551400	Moturoa	3301	New Plymouth City Ward	33	New Plymouth District	07	Taranaki Region	2.60054e+06	6.23761e+06	1	1586900	5	956	57	2
407800	105	515410	Grey Lynn West	701	Western Bays Ward	7	Auckland City	02	Auckland Region	2.66561e+06	6.48095e+06	1	407800	3	919	35	1
406900	90	515420	Grey Lynn East	701	Western Bays Ward	7	Auckland City	02	Auckland Region	2.66556e+06	6.48046e+06	1	406900	5	969	31	2
407700	90	515420	Grey Lynn East	701	Western Bays Ward	7	Auckland City	02	Auckland Region	2.66571e+06	6.481e+06	1	407700	2	917	30	1
408200	69	515420	Grey Lynn East	701	Western Bays Ward	7	Auckland City	02	Auckland Region	2.66578e+06	6.48084e+06	1	408200	4	952	24	2
407600	96	515410	Grey Lynn West	701	Western Bays Ward	7	Auckland City	02	Auckland Region	2.6654e+06	6.48124e+06	1	407600	4	952	34	2
1588200	156	551900	Kawaroa	3301	New Plymouth City Ward	33	New Plymouth District	07	Taranaki Region	2.60182e+06	6.238e+06	1	1588200	7	1027	55	2
1588100	165	551900	Kawaroa	3301	New Plymouth City Ward	33	New Plymouth District	07	Taranaki Region	2.6016e+06	6.23793e+06	1	1588100	6	986	58	2
407100	63	515420	Grey Lynn East	701	Western Bays Ward	7	Auckland City	02	Auckland Region	2.66556e+06	6.48028e+06	1	407100	6	979	22	2
1194500	165	536810	Mt Maunganui North	2301	Mount Maunganui-Papamoa Ward	23	Tauranga City	04	Bay of Plenty Region	2.79074e+06	6.39165e+06	1	1194500	4	948	58	2
407300	69	515420	Grey Lynn East	701	Western Bays Ward	7	Auckland City	02	Auckland Region	2.66574e+06	6.48038e+06	1	407300	5	969	24	2
538900	102	517703	Sandringham East	703	Eden-Albert Ward	7	Auckland City	02	Auckland Region	2.66513e+06	6.47701e+06	1	538900	6	981	36	2
408500	174	515410	Grey Lynn West	701	Western Bays Ward	7	Auckland City	02	Auckland Region	2.66549e+06	6.48122e+06	1	408500	4	944	61	2
2636000	72	595200	Hoon Hay South	6006	Spreydon-Heathcote Ward	60	Christchurch City	13	Canterbury Region	2.47848e+06	5.73706e+06	1	2636000	3	931	24	1
1586700	102	551400	Moturoa	3301	New Plymouth City Ward	33	New Plymouth District	07	Taranaki Region	2.60068e+06	6.23745e+06	1	1586700	9	1112	46	3
1587400	30	551400	Moturoa	3301	New Plymouth City Ward	33	New Plymouth District	07	Taranaki Region	2.60133e+06	6.23754e+06	1	1587400	5	956	10	2
538700	141	517703	Sandringham East	703	Eden-Albert Ward	7	Auckland City	02	Auckland Region	2.66521e+06	6.47709e+06	1	538700	10	1149	63	3
407500	72	515410	Grey Lynn West	701	Western Bays Ward	7	Auckland City	02	Auckland Region	2.66528e+06	6.48128e+06	1	407500	4	952	25	2
2636800	228	594900	Barrington South	6006	Spreydon-Heathcote Ward	60	Christchurch City	13	Canterbury Region	2.47904e+06	5.73826e+06	1	2636800	3	928	75	1
539600	39	517703	Sandringham East	703	Eden-Albert Ward	7	Auckland City	02	Auckland Region	2.66537e+06	6.47682e+06	1	539600	6	991	14	2
407900	159	515410	Grey Lynn West	701	Western Bays Ward	7	Auckland City	02	Auckland Region	2.66538e+06	6.48082e+06	1	407900	6	997	56	2
539300	78	517703	Sandringham East	703	Eden-Albert Ward	7	Auckland City	02	Auckland Region	2.66513e+06	6.47669e+06	1	539300	10	1152	35	3
407000	75	515420	Grey Lynn East	701	Western Bays Ward	7	Auckland City	02	Auckland Region	2.66548e+06	6.48039e+06	1	407000	5	969	26	2
1586600	57	551400	Moturoa	3301	New Plymouth City Ward	33	New Plymouth District	07	Taranaki Region	2.60045e+06	6.23734e+06	1	1586600	9	1112	26	3
2635900	129	595200	Hoon Hay South	6006	Spreydon-Heathcote Ward	60	Christchurch City	13	Canterbury Region	2.47854e+06	5.73742e+06	1	2635900	4	952	45	2
2635200	189	595200	Hoon Hay South	6006	Spreydon-Heathcote Ward	60	Christchurch City	13	Canterbury Region	2.47846e+06	5.73778e+06	1	2635200	4	946	66	2
2897600	3	602900	Fernhill	7103	Cargill Ward	71	Dunedin City	14	Otago Region	2.31558e+06	5.47749e+06	1	2897600	9	1108	1	3
1194700	60	536810	Mt Maunganui North	2301	Mount Maunganui-Papamoa Ward	23	Tauranga City	04	Bay of Plenty Region	2.79098e+06	6.39154e+06	1	1194700	5	968	21	2
408400	39	515410	Grey Lynn West	701	Western Bays Ward	7	Auckland City	02	Auckland Region	2.66527e+06	6.48099e+06	1	408400	6	997	14	2
408100	153	515410	Grey Lynn West	701	Western Bays Ward	7	Auckland City	02	Auckland Region	2.66561e+06	6.48067e+06	1	408100	4	940	54	2
539200	75	517703	Sandringham East	703	Eden-Albert Ward	7	Auckland City	02	Auckland Region	2.66507e+06	6.47676e+06	1	539200	2	903	25	1
408600	84	515410	Grey Lynn West	701	Western Bays Ward	7	Auckland City	02	Auckland Region	2.66559e+06	6.48118e+06	1	408600	3	919	28	1
2636400	99	595200	Hoon Hay South	6006	Spreydon-Heathcote Ward	60	Christchurch City	13	Canterbury Region	2.47881e+06	5.73689e+06	1	2636400	2	906	33	1
2636300	33	595200	Hoon Hay South	6006	Spreydon-Heathcote Ward	60	Christchurch City	13	Canterbury Region	2.47859e+06	5.73686e+06	1	2636300	2	906	11	1
407200	48	515420	Grey Lynn East	701	Western Bays Ward	7	Auckland City	02	Auckland Region	2.66565e+06	6.48032e+06	1	407200	5	969	17	2
2636700	141	594900	Barrington South	6006	Spreydon-Heathcote Ward	60	Christchurch City	13	Canterbury Region	2.4793e+06	5.73849e+06	1	2636700	8	1036	63	3
1194900	96	536810	Mt Maunganui North	2301	Mount Maunganui-Papamoa Ward	23	Tauranga City	04	Bay of Plenty Region	2.79093e+06	6.39133e+06	1	1194900	5	974	34	2
539000	99	517703	Sandringham East	703	Eden-Albert Ward	7	Auckland City	02	Auckland Region	2.66497e+06	6.4769e+06	1	539000	6	981	35	2
681328	96	522722	Aberfeldy	806	Howick Ward	8	Manukau City	02	Auckland Region	2.68056e+06	6.47535e+06	1	681328	4	936	34	2
669601	120	522302	Papatoetoe East	802	Papatoetoe Ward	8	Manukau City	02	Auckland Region	2.6769e+06	6.468e+06	1	669601	8	1050	54	3
2635300	120	595200	Hoon Hay South	6006	Spreydon-Heathcote Ward	60	Christchurch City	13	Canterbury Region	2.47831e+06	5.73761e+06	1	2635300	3	932	40	1
407400	99	515420	Grey Lynn East	701	Western Bays Ward	7	Auckland City	02	Auckland Region	2.66583e+06	6.48042e+06	1	407400	5	954	35	2
1195000	69	536810	Mt Maunganui North	2301	Mount Maunganui-Papamoa Ward	23	Tauranga City	04	Bay of Plenty Region	2.79093e+06	6.39115e+06	1	1195000	5	974	24	2
539400	90	517703	Sandringham East	703	Eden-Albert Ward	7	Auckland City	02	Auckland Region	2.66526e+06	6.47684e+06	1	539400	10	1152	40	3
408300	78	515420	Grey Lynn East	701	Western Bays Ward	7	Auckland City	02	Auckland Region	2.66587e+06	6.48089e+06	1	408300	4	952	27	2
2636100	144	595200	Hoon Hay South	6006	Spreydon-Heathcote Ward	60	Christchurch City	13	Canterbury Region	2.47855e+06	5.73712e+06	1	2636100	4	947	50	2
2636200	156	595200	Hoon Hay South	6006	Spreydon-Heathcote Ward	60	Christchurch City	13	Canterbury Region	2.4787e+06	5.73711e+06	1	2636200	6	977	55	2
1586800	120	551400	Moturoa	3301	New Plymouth City Ward	33	New Plymouth District	07	Taranaki Region	2.60064e+06	6.23755e+06	1	1586800	7	1023	42	2
1587502	18	551501	Lynmouth	3301	New Plymouth City Ward	33	New Plymouth District	07	Taranaki Region	2.60151e+06	6.23758e+06	1	1587502	8	1049	8	3
2635400	243	595200	Hoon Hay South	6006	Spreydon-Heathcote Ward	60	Christchurch City	13	Canterbury Region	2.47858e+06	5.73781e+06	1	2635400	3	930	80	1
2897500	132	602900	Fernhill	7103	Cargill Ward	71	Dunedin City	14	Otago Region	2.31556e+06	5.47765e+06	1	2897500	9	1108	59	3
1194400	96	536810	Mt Maunganui North	2301	Mount Maunganui-Papamoa Ward	23	Tauranga City	04	Bay of Plenty Region	2.7906e+06	6.3916e+06	1	1194400	8	1034	43	3
669300	159	522302	Papatoetoe East	802	Papatoetoe Ward	8	Manukau City	02	Auckland Region	2.67723e+06	6.46758e+06	1	669300	8	1059	72	3
539100	102	517703	Sandringham East	703	Eden-Albert Ward	7	Auckland City	02	Auckland Region	2.66503e+06	6.47681e+06	1	539100	2	903	34	1
2635600	90	595200	Hoon Hay South	6006	Spreydon-Heathcote Ward	60	Christchurch City	13	Canterbury Region	2.47888e+06	5.73708e+06	1	2635600	3	931	30	1
2901000	3	603100	Stuart St-Frederick St	7103	Cargill Ward	71	Dunedin City	14	Otago Region	2.31627e+06	5.47864e+06	1	2901000	9	1128	1	3
2902300	45	603100	Stuart St-Frederick St	7103	Cargill Ward	71	Dunedin City	14	Otago Region	2.31621e+06	5.47913e+06	1	2902300	9	1109	20	3
409400	81	515420	Grey Lynn East	701	Western Bays Ward	7	Auckland City	02	Auckland Region	2.6658e+06	6.48064e+06	1	409400	4	937	28	2
1588700	105	551900	Kawaroa	3301	New Plymouth City Ward	33	New Plymouth District	07	Taranaki Region	2.60168e+06	6.23773e+06	1	1588700	7	1012	37	2
1588300	75	551900	Kawaroa	3301	New Plymouth City Ward	33	New Plymouth District	07	Taranaki Region	2.60205e+06	6.23812e+06	1	1588300	8	1037	34	3
1195400	195	536810	Mt Maunganui North	2301	Mount Maunganui-Papamoa Ward	23	Tauranga City	04	Bay of Plenty Region	2.79136e+06	6.39128e+06	1	1195400	4	951	68	2
1196200	183	536810	Mt Maunganui North	2301	Mount Maunganui-Papamoa Ward	23	Tauranga City	04	Bay of Plenty Region	2.79161e+06	6.39047e+06	1	1196200	7	1012	64	2
1196400	159	536810	Mt Maunganui North	2301	Mount Maunganui-Papamoa Ward	23	Tauranga City	04	Bay of Plenty Region	2.79217e+06	6.39024e+06	1	1196400	5	954	56	2
2900000	66	603000	High St-Stuart St	7103	Cargill Ward	71	Dunedin City	14	Otago Region	2.31596e+06	5.47851e+06	1	2900000	7	1026	23	2
2636900	252	594900	Barrington South	6006	Spreydon-Heathcote Ward	60	Christchurch City	13	Canterbury Region	2.47933e+06	5.73832e+06	1	2636900	5	955	88	2
1196500	258	536810	Mt Maunganui North	2301	Mount Maunganui-Papamoa Ward	23	Tauranga City	04	Bay of Plenty Region	2.79208e+06	6.39017e+06	1	1196500	3	928	85	1
1195200	69	536810	Mt Maunganui North	2301	Mount Maunganui-Papamoa Ward	23	Tauranga City	04	Bay of Plenty Region	2.79117e+06	6.39114e+06	1	1195200	5	960	24	2
1195100	39	536810	Mt Maunganui North	2301	Mount Maunganui-Papamoa Ward	23	Tauranga City	04	Bay of Plenty Region	2.79104e+06	6.39119e+06	1	1195100	5	960	14	2
410000	168	515420	Grey Lynn East	701	Western Bays Ward	7	Auckland City	02	Auckland Region	2.66609e+06	6.48059e+06	1	410000	5	971	59	2
2899700	48	603000	High St-Stuart St	7103	Cargill Ward	71	Dunedin City	14	Otago Region	2.3162e+06	5.47838e+06	1	2899700	7	1026	17	2
2899300	102	603000	High St-Stuart St	7103	Cargill Ward	71	Dunedin City	14	Otago Region	2.31592e+06	5.47839e+06	1	2899300	7	1009	36	2
409700	96	515420	Grey Lynn East	701	Western Bays Ward	7	Auckland City	02	Auckland Region	2.66591e+06	6.48048e+06	1	409700	4	941	34	2
541100	237	517702	Sandringham West	703	Eden-Albert Ward	7	Auckland City	02	Auckland Region	2.66466e+06	6.47734e+06	1	541100	6	987	83	2
1497600	105	548000	Mayfair	3005	Hastings Ward	30	Hastings District	06	Hawke's Bay Region	2.84107e+06	6.16682e+06	1	1497600	6	996	37	2
408800	78	515420	Grey Lynn East	701	Western Bays Ward	7	Auckland City	02	Auckland Region	2.6658e+06	6.48118e+06	1	408800	2	906	26	1
1588400	108	551900	Kawaroa	3301	New Plymouth City Ward	33	New Plymouth District	07	Taranaki Region	2.60207e+06	6.23802e+06	1	1588400	8	1057	49	3
1196700	255	536810	Mt Maunganui North	2301	Mount Maunganui-Papamoa Ward	23	Tauranga City	04	Bay of Plenty Region	2.79199e+06	6.39001e+06	1	1196700	5	958	89	2
1195600	48	536810	Mt Maunganui North	2301	Mount Maunganui-Papamoa Ward	23	Tauranga City	04	Bay of Plenty Region	2.79111e+06	6.39098e+06	1	1195600	4	942	17	2
1195500	63	536810	Mt Maunganui North	2301	Mount Maunganui-Papamoa Ward	23	Tauranga City	04	Bay of Plenty Region	2.791e+06	6.39095e+06	1	1195500	4	942	22	2
2899800	42	603000	High St-Stuart St	7103	Cargill Ward	71	Dunedin City	14	Otago Region	2.31629e+06	5.47839e+06	1	2899800	7	1022	15	2
408900	87	515420	Grey Lynn East	701	Western Bays Ward	7	Auckland City	02	Auckland Region	2.6659e+06	6.48119e+06	1	408900	2	906	29	1
409500	96	515420	Grey Lynn East	701	Western Bays Ward	7	Auckland City	02	Auckland Region	2.66588e+06	6.4807e+06	1	409500	4	937	34	2
671400	132	522400	Puhinui	802	Papatoetoe Ward	8	Manukau City	02	Auckland Region	2.67699e+06	6.46734e+06	1	671400	4	945	46	2
278006	57	512901	Parrs Park	602	Waitakere Ward	6	Waitakere City	02	Auckland Region	2.65514e+06	6.4764e+06	1	278006	9	1099	26	3
278300	282	512901	Parrs Park	602	Waitakere Ward	6	Waitakere City	02	Auckland Region	2.65528e+06	6.47555e+06	1	278300	5	954	99	2
539900	141	517703	Sandringham East	703	Eden-Albert Ward	7	Auckland City	02	Auckland Region	2.66528e+06	6.47652e+06	1	539900	6	998	49	2
1588500	96	551900	Kawaroa	3301	New Plymouth City Ward	33	New Plymouth District	07	Taranaki Region	2.60212e+06	6.23794e+06	1	1588500	9	1123	43	3
2637200	207	594900	Barrington South	6006	Spreydon-Heathcote Ward	60	Christchurch City	13	Canterbury Region	2.47926e+06	5.73814e+06	1	2637200	3	933	68	1
1196000	93	536810	Mt Maunganui North	2301	Mount Maunganui-Papamoa Ward	23	Tauranga City	04	Bay of Plenty Region	2.79144e+06	6.39075e+06	1	1196000	6	977	33	2
1196300	192	536810	Mt Maunganui North	2301	Mount Maunganui-Papamoa Ward	23	Tauranga City	04	Bay of Plenty Region	2.7918e+06	6.39058e+06	1	1196300	4	938	67	2
278404	183	512901	Parrs Park	602	Waitakere Ward	6	Waitakere City	02	Auckland Region	2.65552e+06	6.47557e+06	1	278404	8	1033	82	3
409100	72	515420	Grey Lynn East	701	Western Bays Ward	7	Auckland City	02	Auckland Region	2.66611e+06	6.48122e+06	1	409100	2	917	24	1
541200	198	517702	Sandringham West	703	Eden-Albert Ward	7	Auckland City	02	Auckland Region	2.66479e+06	6.47728e+06	1	541200	4	952	69	2
2638100	162	594900	Barrington South	6006	Spreydon-Heathcote Ward	60	Christchurch City	13	Canterbury Region	2.47895e+06	5.73726e+06	1	2638100	2	918	53	1
1588600	126	551900	Kawaroa	3301	New Plymouth City Ward	33	New Plymouth District	07	Taranaki Region	2.60188e+06	6.2378e+06	1	1588600	8	1068	57	3
1589000	63	551900	Kawaroa	3301	New Plymouth City Ward	33	New Plymouth District	07	Taranaki Region	2.60211e+06	6.23778e+06	1	1589000	7	1027	22	2
409300	87	515420	Grey Lynn East	701	Western Bays Ward	7	Auckland City	02	Auckland Region	2.66572e+06	6.48058e+06	1	409300	4	951	30	2
671500	201	522400	Puhinui	802	Papatoetoe Ward	8	Manukau City	02	Auckland Region	2.67702e+06	6.46711e+06	1	671500	7	1003	70	2
410200	42	515420	Grey Lynn East	701	Western Bays Ward	7	Auckland City	02	Auckland Region	2.66592e+06	6.48105e+06	1	410200	5	959	15	2
278007	192	512901	Parrs Park	602	Waitakere Ward	6	Waitakere City	02	Auckland Region	2.65498e+06	6.47634e+06	1	278007	9	1099	86	3
1195300	108	536810	Mt Maunganui North	2301	Mount Maunganui-Papamoa Ward	23	Tauranga City	04	Bay of Plenty Region	2.79127e+06	6.3912e+06	1	1195300	2	907	36	1
2899900	27	603000	High St-Stuart St	7103	Cargill Ward	71	Dunedin City	14	Otago Region	2.31609e+06	5.47847e+06	1	2899900	7	1022	9	2
2899200	90	603000	High St-Stuart St	7103	Cargill Ward	71	Dunedin City	14	Otago Region	2.31586e+06	5.47828e+06	1	2899200	7	1026	31	2
671700	231	524601	Manukau Central	802	Papatoetoe Ward	8	Manukau City	02	Auckland Region	2.67713e+06	6.46701e+06	1	671700	9	1084	104	3
671100	93	522400	Puhinui	802	Papatoetoe Ward	8	Manukau City	02	Auckland Region	2.67719e+06	6.4674e+06	1	671100	8	1065	42	3
278901	186	512901	Parrs Park	602	Waitakere Ward	6	Waitakere City	02	Auckland Region	2.65513e+06	6.47581e+06	1	278901	5	958	65	2
410300	66	515420	Grey Lynn East	701	Western Bays Ward	7	Auckland City	02	Auckland Region	2.66595e+06	6.48094e+06	1	410300	3	934	22	1
278510	222	512901	Parrs Park	602	Waitakere Ward	6	Waitakere City	02	Auckland Region	2.65574e+06	6.47562e+06	1	278510	10	1280	100	3
409000	72	515420	Grey Lynn East	701	Western Bays Ward	7	Auckland City	02	Auckland Region	2.666e+06	6.4812e+06	1	409000	3	925	24	1
2121600	108	572900	Thorndon-Tinakori Road	4703	Lambton Ward	47	Wellington City	09	Wellington Region	2.6584e+06	5.99063e+06	1	2121600	5	956	38	2
1589100	36	551900	Kawaroa	3301	New Plymouth City Ward	33	New Plymouth District	07	Taranaki Region	2.60215e+06	6.23762e+06	1	1589100	9	1123	16	3
1588900	72	551900	Kawaroa	3301	New Plymouth City Ward	33	New Plymouth District	07	Taranaki Region	2.60195e+06	6.23766e+06	1	1588900	8	1055	32	3
2637000	120	594900	Barrington South	6006	Spreydon-Heathcote Ward	60	Christchurch City	13	Canterbury Region	2.47901e+06	5.73805e+06	1	2637000	8	1070	54	3
2637100	36	594900	Barrington South	6006	Spreydon-Heathcote Ward	60	Christchurch City	13	Canterbury Region	2.47884e+06	5.73804e+06	1	2637100	8	1070	16	3
1196600	192	536810	Mt Maunganui North	2301	Mount Maunganui-Papamoa Ward	23	Tauranga City	04	Bay of Plenty Region	2.79181e+06	6.39023e+06	1	1196600	3	934	63	1
1195800	84	536810	Mt Maunganui North	2301	Mount Maunganui-Papamoa Ward	23	Tauranga City	04	Bay of Plenty Region	2.79159e+06	6.39095e+06	1	1195800	5	963	29	2
410100	87	515420	Grey Lynn East	701	Western Bays Ward	7	Auckland City	02	Auckland Region	2.66581e+06	6.48103e+06	1	410100	5	959	30	2
539700	60	517703	Sandringham East	703	Eden-Albert Ward	7	Auckland City	02	Auckland Region	2.66514e+06	6.47655e+06	1	539700	6	991	21	2
278005	207	512901	Parrs Park	602	Waitakere Ward	6	Waitakere City	02	Auckland Region	2.65501e+06	6.47651e+06	1	278005	9	1134	93	3
1196100	108	536810	Mt Maunganui North	2301	Mount Maunganui-Papamoa Ward	23	Tauranga City	04	Bay of Plenty Region	2.79133e+06	6.39071e+06	1	1196100	5	963	38	2
408700	198	515420	Grey Lynn East	701	Western Bays Ward	7	Auckland City	02	Auckland Region	2.6657e+06	6.48117e+06	1	408700	3	925	65	1
2899600	39	603000	High St-Stuart St	7103	Cargill Ward	71	Dunedin City	14	Otago Region	2.31601e+06	5.47827e+06	1	2899600	7	1022	14	2
2638500	294	590300	Middleton	6006	Spreydon-Heathcote Ward	60	Christchurch City	13	Canterbury Region	2.47816e+06	5.7401e+06	1	2638500	7	1003	103	2
539800	126	517703	Sandringham East	703	Eden-Albert Ward	7	Auckland City	02	Auckland Region	2.66522e+06	6.47654e+06	1	539800	8	1030	57	3
671200	81	522400	Puhinui	802	Papatoetoe Ward	8	Manukau City	02	Auckland Region	2.67734e+06	6.46726e+06	1	671200	8	1065	36	3
278103	309	512901	Parrs Park	602	Waitakere Ward	6	Waitakere City	02	Auckland Region	2.65533e+06	6.47628e+06	1	278103	9	1095	139	3
409200	21	515420	Grey Lynn East	701	Western Bays Ward	7	Auckland City	02	Auckland Region	2.66623e+06	6.48119e+06	1	409200	3	925	7	1
409600	84	515420	Grey Lynn East	701	Western Bays Ward	7	Auckland City	02	Auckland Region	2.66596e+06	6.48076e+06	1	409600	5	971	29	2
409800	66	515420	Grey Lynn East	701	Western Bays Ward	7	Auckland City	02	Auckland Region	2.66597e+06	6.48058e+06	1	409800	4	951	23	2
1203207	42	536810	Mt Maunganui North	2301	Mount Maunganui-Papamoa Ward	23	Tauranga City	04	Bay of Plenty Region	2.79176e+06	6.38982e+06	1	1203207	9	1110	19	3
2899500	24	603000	High St-Stuart St	7103	Cargill Ward	71	Dunedin City	14	Otago Region	2.31579e+06	5.47814e+06	1	2899500	7	1022	8	2
543900	141	518101	Mt Eden North	703	Eden-Albert Ward	7	Auckland City	02	Auckland Region	2.66708e+06	6.4796e+06	1	543900	2	905	47	1
2509901	210	588101	Redwood North	6001	Shirley-Papanui Ward	60	Christchurch City	13	Canterbury Region	2.47915e+06	5.74826e+06	1	2509901	4	950	74	2
2903700	27	603100	Stuart St-Frederick St	7103	Cargill Ward	71	Dunedin City	14	Otago Region	2.31629e+06	5.47913e+06	1	2903700	9	1128	12	3
543800	186	518101	Mt Eden North	703	Eden-Albert Ward	7	Auckland City	02	Auckland Region	2.66728e+06	6.47967e+06	1	543800	5	974	65	2
412402	12	514200	Newton	704	Hobson Ward	7	Auckland City	02	Auckland Region	2.66728e+06	6.48061e+06	1	412402	6	984	4	2
544500	60	518101	Mt Eden North	703	Eden-Albert Ward	7	Auckland City	02	Auckland Region	2.66677e+06	6.47978e+06	1	544500	6	979	21	2
544302	24	518101	Mt Eden North	703	Eden-Albert Ward	7	Auckland City	02	Auckland Region	2.66677e+06	6.47985e+06	1	544302	4	948	8	2
412500	72	514200	Newton	704	Hobson Ward	7	Auckland City	02	Auckland Region	2.66729e+06	6.48069e+06	1	412500	6	984	25	2
281300	186	513013	McLaren Park	602	Waitakere Ward	6	Waitakere City	02	Auckland Region	2.65442e+06	6.47672e+06	1	281300	8	1061	84	3
410700	120	515420	Grey Lynn East	701	Western Bays Ward	7	Auckland City	02	Auckland Region	2.66618e+06	6.48065e+06	1	410700	1	895	40	1
1591400	39	551800	New Plymouth Central	3301	New Plymouth City Ward	33	New Plymouth District	07	Taranaki Region	2.60238e+06	6.23771e+06	1	1591400	8	1041	18	3
1592100	6	551800	New Plymouth Central	3301	New Plymouth City Ward	33	New Plymouth District	07	Taranaki Region	2.60289e+06	6.2378e+06	1	1592100	6	999	2	2
1198000	75	536821	Omanu	2301	Mount Maunganui-Papamoa Ward	23	Tauranga City	04	Bay of Plenty Region	2.79284e+06	6.38927e+06	1	1198000	7	1011	26	2
1198300	99	536821	Omanu	2301	Mount Maunganui-Papamoa Ward	23	Tauranga City	04	Bay of Plenty Region	2.793e+06	6.38933e+06	1	1198300	7	1011	35	2
1197500	135	536821	Omanu	2301	Mount Maunganui-Papamoa Ward	23	Tauranga City	04	Bay of Plenty Region	2.7925e+06	6.38941e+06	1	1197500	3	922	45	1
1197400	117	536821	Omanu	2301	Mount Maunganui-Papamoa Ward	23	Tauranga City	04	Bay of Plenty Region	2.79238e+06	6.38937e+06	1	1197400	8	1036	53	3
2638800	198	594800	Barrington North	6006	Spreydon-Heathcote Ward	60	Christchurch City	13	Canterbury Region	2.47765e+06	5.7394e+06	1	2638800	6	998	69	2
411700	27	514200	Newton	701	Western Bays Ward	7	Auckland City	02	Auckland Region	2.66676e+06	6.48091e+06	1	411700	6	990	9	2
410900	54	515420	Grey Lynn East	701	Western Bays Ward	7	Auckland City	02	Auckland Region	2.66615e+06	6.48108e+06	1	410900	3	929	18	1
2901600	45	603100	Stuart St-Frederick St	7103	Cargill Ward	71	Dunedin City	14	Otago Region	2.31652e+06	5.47859e+06	1	2901600	9	1128	20	3
541500	159	517702	Sandringham West	703	Eden-Albert Ward	7	Auckland City	02	Auckland Region	2.66485e+06	6.477e+06	1	541500	4	947	56	2
410500	114	515420	Grey Lynn East	701	Western Bays Ward	7	Auckland City	02	Auckland Region	2.66604e+06	6.48082e+06	1	410500	5	958	40	2
410600	108	515420	Grey Lynn East	701	Western Bays Ward	7	Auckland City	02	Auckland Region	2.66612e+06	6.48088e+06	1	410600	3	934	36	1
1590500	90	551800	New Plymouth Central	3301	New Plymouth City Ward	33	New Plymouth District	07	Taranaki Region	2.60229e+06	6.23814e+06	1	1590500	6	991	31	2
1197800	129	536821	Omanu	2301	Mount Maunganui-Papamoa Ward	23	Tauranga City	04	Bay of Plenty Region	2.79262e+06	6.38913e+06	1	1197800	8	1046	58	3
2508200	27	588102	Redwood South	6001	Shirley-Papanui Ward	60	Christchurch City	13	Canterbury Region	2.479e+06	5.74701e+06	1	2508200	9	1126	12	3
2508301	162	588102	Redwood South	6001	Shirley-Papanui Ward	60	Christchurch City	13	Canterbury Region	2.47972e+06	5.74695e+06	1	2508301	2	900	53	1
2508600	177	588102	Redwood South	6001	Shirley-Papanui Ward	60	Christchurch City	13	Canterbury Region	2.47949e+06	5.74644e+06	1	2508600	6	985	62	2
2638900	165	594800	Barrington North	6006	Spreydon-Heathcote Ward	60	Christchurch City	13	Canterbury Region	2.4778e+06	5.73937e+06	1	2638900	8	1053	74	3
410800	132	515420	Grey Lynn East	701	Western Bays Ward	7	Auckland City	02	Auckland Region	2.66624e+06	6.48073e+06	1	410800	2	914	44	1
2509001	180	588102	Redwood South	6001	Shirley-Papanui Ward	60	Christchurch City	13	Canterbury Region	2.47924e+06	5.74754e+06	1	2509001	6	995	63	2
411900	57	514200	Newton	701	Western Bays Ward	7	Auckland City	02	Auckland Region	2.66686e+06	6.481e+06	1	411900	6	990	20	2
411500	45	515420	Grey Lynn East	701	Western Bays Ward	7	Auckland City	02	Auckland Region	2.66648e+06	6.48091e+06	1	411500	3	922	15	1
1590800	75	551800	New Plymouth Central	3301	New Plymouth City Ward	33	New Plymouth District	07	Taranaki Region	2.60251e+06	6.23808e+06	1	1590800	9	1077	34	3
2901100	3	603100	Stuart St-Frederick St	7103	Cargill Ward	71	Dunedin City	14	Otago Region	2.31634e+06	5.47884e+06	1	2901100	9	1128	1	3
2901400	6	603100	Stuart St-Frederick St	7103	Cargill Ward	71	Dunedin City	14	Otago Region	2.31649e+06	5.47888e+06	1	2901400	9	1128	3	3
542700	519	518101	Mt Eden North	703	Eden-Albert Ward	7	Auckland City	02	Auckland Region	2.66768e+06	6.48e+06	1	542700	7	1020	182	2
411200	114	515420	Grey Lynn East	701	Western Bays Ward	7	Auckland City	02	Auckland Region	2.6662e+06	6.48094e+06	1	411200	2	915	38	1
2122000	18	572900	Thorndon-Tinakori Road	4703	Lambton Ward	47	Wellington City	09	Wellington Region	2.65847e+06	5.99037e+06	1	2122000	4	947	6	2
1591100	6	551800	New Plymouth Central	3301	New Plymouth City Ward	33	New Plymouth District	07	Taranaki Region	2.60245e+06	6.23791e+06	1	1591100	8	1041	3	3
1196800	135	536810	Mt Maunganui North	2301	Mount Maunganui-Papamoa Ward	23	Tauranga City	04	Bay of Plenty Region	2.79191e+06	6.38983e+06	1	1196800	6	976	47	2
1197200	219	536821	Omanu	2301	Mount Maunganui-Papamoa Ward	23	Tauranga City	04	Bay of Plenty Region	2.79235e+06	6.38972e+06	1	1197200	4	943	77	2
2507507	18	588102	Redwood South	6001	Shirley-Papanui Ward	60	Christchurch City	13	Canterbury Region	2.4798e+06	5.74663e+06	1	2507507	4	946	6	2
2508500	234	588102	Redwood South	6001	Shirley-Papanui Ward	60	Christchurch City	13	Canterbury Region	2.47932e+06	5.7467e+06	1	2508500	3	924	77	1
2508302	276	588102	Redwood South	6001	Shirley-Papanui Ward	60	Christchurch City	13	Canterbury Region	2.47961e+06	5.74668e+06	1	2508302	3	927	91	1
2507608	90	588102	Redwood South	6001	Shirley-Papanui Ward	60	Christchurch City	13	Canterbury Region	2.47994e+06	5.7466e+06	1	2507608	2	914	30	1
2639000	186	594800	Barrington North	6006	Spreydon-Heathcote Ward	60	Christchurch City	13	Canterbury Region	2.47745e+06	5.73922e+06	1	2639000	9	1105	84	3
2508000	189	588102	Redwood South	6001	Shirley-Papanui Ward	60	Christchurch City	13	Canterbury Region	2.4792e+06	5.74728e+06	1	2508000	9	1073	85	3
2901800	138	603100	Stuart St-Frederick St	7103	Cargill Ward	71	Dunedin City	14	Otago Region	2.31668e+06	5.47877e+06	1	2901800	10	1159	62	3
542502	270	518101	Mt Eden North	703	Eden-Albert Ward	7	Auckland City	02	Auckland Region	2.66717e+06	6.47992e+06	1	542502	5	971	94	2
542600	135	518101	Mt Eden North	703	Eden-Albert Ward	7	Auckland City	02	Auckland Region	2.66753e+06	6.48003e+06	1	542600	4	950	47	2
542800	285	518101	Mt Eden North	703	Eden-Albert Ward	7	Auckland City	02	Auckland Region	2.6674e+06	6.47985e+06	1	542800	6	981	100	2
1590900	63	551800	New Plymouth Central	3301	New Plymouth City Ward	33	New Plymouth District	07	Taranaki Region	2.60224e+06	6.23783e+06	1	1590900	8	1041	28	3
1591500	3	551800	New Plymouth Central	3301	New Plymouth City Ward	33	New Plymouth District	07	Taranaki Region	2.60266e+06	6.23783e+06	1	1591500	6	999	1	2
411600	12	515420	Grey Lynn East	701	Western Bays Ward	7	Auckland City	02	Auckland Region	2.66657e+06	6.48096e+06	1	411600	3	922	4	1
1197000	174	536821	Omanu	2301	Mount Maunganui-Papamoa Ward	23	Tauranga City	04	Bay of Plenty Region	2.79212e+06	6.38959e+06	1	1197000	4	940	61	2
1197700	252	536821	Omanu	2301	Mount Maunganui-Papamoa Ward	23	Tauranga City	04	Bay of Plenty Region	2.79278e+06	6.38951e+06	1	1197700	5	960	88	2
1197600	111	536821	Omanu	2301	Mount Maunganui-Papamoa Ward	23	Tauranga City	04	Bay of Plenty Region	2.79262e+06	6.38946e+06	1	1197600	3	932	37	1
2508103	90	588102	Redwood South	6001	Shirley-Papanui Ward	60	Christchurch City	13	Canterbury Region	2.47917e+06	5.74718e+06	1	2508103	9	1126	40	3
2901200	51	603100	Stuart St-Frederick St	7103	Cargill Ward	71	Dunedin City	14	Otago Region	2.31645e+06	5.47907e+06	1	2901200	9	1128	23	3
2901300	546	603100	Stuart St-Frederick St	7103	Cargill Ward	71	Dunedin City	14	Otago Region	2.31656e+06	5.47905e+06	1	2901300	9	1128	246	3
543100	96	518101	Mt Eden North	703	Eden-Albert Ward	7	Auckland City	02	Auckland Region	2.6674e+06	6.47959e+06	1	543100	3	934	32	1
542400	195	517702	Sandringham West	703	Eden-Albert Ward	7	Auckland City	02	Auckland Region	2.66456e+06	6.47713e+06	1	542400	6	995	68	2
2638701	210	594800	Barrington North	6006	Spreydon-Heathcote Ward	60	Christchurch City	13	Canterbury Region	2.47794e+06	5.73962e+06	1	2638701	7	1010	74	2
2902100	141	603100	Stuart St-Frederick St	7103	Cargill Ward	71	Dunedin City	14	Otago Region	2.31669e+06	5.479e+06	1	2902100	9	1089	63	3
2902200	126	603100	Stuart St-Frederick St	7103	Cargill Ward	71	Dunedin City	14	Otago Region	2.31663e+06	5.47902e+06	1	2902200	9	1102	57	3
2902000	78	603100	Stuart St-Frederick St	7103	Cargill Ward	71	Dunedin City	14	Otago Region	2.31677e+06	5.479e+06	1	2902000	9	1109	35	3
280905	357	513012	Palm Heights	602	Waitakere Ward	6	Waitakere City	02	Auckland Region	2.6541e+06	6.47716e+06	1	280905	10	1147	161	3
411000	15	515420	Grey Lynn East	701	Western Bays Ward	7	Auckland City	02	Auckland Region	2.66641e+06	6.48111e+06	1	411000	2	915	5	1
411800	87	514200	Newton	701	Western Bays Ward	7	Auckland City	02	Auckland Region	2.6668e+06	6.48082e+06	1	411800	7	1007	30	2
1591700	18	551800	New Plymouth Central	3301	New Plymouth City Ward	33	New Plymouth District	07	Taranaki Region	2.6027e+06	6.23807e+06	1	1591700	6	999	6	2
1198500	192	536821	Omanu	2301	Mount Maunganui-Papamoa Ward	23	Tauranga City	04	Bay of Plenty Region	2.7929e+06	6.38889e+06	1	1198500	5	964	67	2
1198400	141	536821	Omanu	2301	Mount Maunganui-Papamoa Ward	23	Tauranga City	04	Bay of Plenty Region	2.79281e+06	6.38878e+06	1	1198400	9	1112	63	3
2507609	132	588102	Redwood South	6001	Shirley-Papanui Ward	60	Christchurch City	13	Canterbury Region	2.47991e+06	5.74697e+06	1	2507609	2	914	44	1
2507506	39	588102	Redwood South	6001	Shirley-Papanui Ward	60	Christchurch City	13	Canterbury Region	2.47982e+06	5.74693e+06	1	2507506	4	946	14	2
2509002	60	588102	Redwood South	6001	Shirley-Papanui Ward	60	Christchurch City	13	Canterbury Region	2.47934e+06	5.74748e+06	1	2509002	1	886	20	1
542501	9	518101	Mt Eden North	704	Hobson Ward	7	Auckland City	02	Auckland Region	2.66741e+06	6.48011e+06	1	542501	5	971	3	2
412100	36	514200	Newton	704	Hobson Ward	7	Auckland City	02	Auckland Region	2.66719e+06	6.48111e+06	1	412100	6	990	13	2
542900	300	518101	Mt Eden North	703	Eden-Albert Ward	7	Auckland City	02	Auckland Region	2.66754e+06	6.47971e+06	1	542900	7	1020	105	2
410400	78	515420	Grey Lynn East	701	Western Bays Ward	7	Auckland City	02	Auckland Region	2.66602e+06	6.48103e+06	1	410400	3	929	26	1
1591200	3	551800	New Plymouth Central	3301	New Plymouth City Ward	33	New Plymouth District	07	Taranaki Region	2.60256e+06	6.23799e+06	1	1591200	8	1041	1	3
1590700	48	551800	New Plymouth Central	3301	New Plymouth City Ward	33	New Plymouth District	07	Taranaki Region	2.60234e+06	6.23802e+06	1	1590700	6	999	17	2
412000	72	514200	Newton	704	Hobson Ward	7	Auckland City	02	Auckland Region	2.6671e+06	6.48108e+06	1	412000	7	1007	25	2
1196900	144	536810	Mt Maunganui North	2301	Mount Maunganui-Papamoa Ward	23	Tauranga City	04	Bay of Plenty Region	2.79203e+06	6.38986e+06	1	1196900	6	992	50	2
1197300	213	536821	Omanu	2301	Mount Maunganui-Papamoa Ward	23	Tauranga City	04	Bay of Plenty Region	2.79253e+06	6.3898e+06	1	1197300	4	947	75	2
2508400	102	588102	Redwood South	6001	Shirley-Papanui Ward	60	Christchurch City	13	Canterbury Region	2.47905e+06	5.74675e+06	1	2508400	5	958	36	2
2638600	186	594800	Barrington North	6006	Spreydon-Heathcote Ward	60	Christchurch City	13	Canterbury Region	2.47821e+06	5.73977e+06	1	2638600	5	963	65	2
2638702	111	594800	Barrington North	6006	Spreydon-Heathcote Ward	60	Christchurch City	13	Canterbury Region	2.47806e+06	5.73959e+06	1	2638702	6	994	39	2
2509202	114	588102	Redwood South	6001	Shirley-Papanui Ward	60	Christchurch City	13	Canterbury Region	2.47921e+06	5.74739e+06	1	2509202	4	936	40	2
2509201	75	588102	Redwood South	6001	Shirley-Papanui Ward	60	Christchurch City	13	Canterbury Region	2.47935e+06	5.74741e+06	1	2509201	5	968	26	2
411100	36	515420	Grey Lynn East	701	Western Bays Ward	7	Auckland City	02	Auckland Region	2.66628e+06	6.481e+06	1	411100	2	915	12	1
411300	75	515420	Grey Lynn East	701	Western Bays Ward	7	Auckland City	02	Auckland Region	2.66632e+06	6.48078e+06	1	411300	3	922	25	1
411400	12	515420	Grey Lynn East	701	Western Bays Ward	7	Auckland City	02	Auckland Region	2.6664e+06	6.48085e+06	1	411400	3	922	4	1
2121900	69	572900	Thorndon-Tinakori Road	4703	Lambton Ward	47	Wellington City	09	Wellington Region	2.6584e+06	5.99032e+06	1	2121900	6	985	24	2
1591000	33	551800	New Plymouth Central	3301	New Plymouth City Ward	33	New Plymouth District	07	Taranaki Region	2.60235e+06	6.23788e+06	1	1591000	8	1041	15	3
2508701	87	588102	Redwood South	6001	Shirley-Papanui Ward	60	Christchurch City	13	Canterbury Region	2.47928e+06	5.74627e+06	1	2508701	6	985	30	2
1197100	162	536821	Omanu	2301	Mount Maunganui-Papamoa Ward	23	Tauranga City	04	Bay of Plenty Region	2.79224e+06	6.38963e+06	1	1197100	3	923	53	1
2642300	198	594800	Barrington North	6006	Spreydon-Heathcote Ward	60	Christchurch City	13	Canterbury Region	2.47838e+06	5.74001e+06	1	2642300	6	980	69	2
2642200	63	594800	Barrington North	6006	Spreydon-Heathcote Ward	60	Christchurch City	13	Canterbury Region	2.47877e+06	5.73823e+06	1	2642200	4	948	22	2
2118700	30	572900	Thorndon-Tinakori Road	4703	Lambton Ward	47	Wellington City	09	Wellington Region	2.65911e+06	5.99108e+06	1	2118700	3	931	10	1
1594100	6	551800	New Plymouth Central	3301	New Plymouth City Ward	33	New Plymouth District	07	Taranaki Region	2.60395e+06	6.2383e+06	1	1594100	7	1013	2	2
2641701	165	594800	Barrington North	6006	Spreydon-Heathcote Ward	60	Christchurch City	13	Canterbury Region	2.4787e+06	5.73842e+06	1	2641701	9	1114	74	3
2641900	165	594800	Barrington North	6006	Spreydon-Heathcote Ward	60	Christchurch City	13	Canterbury Region	2.47888e+06	5.73851e+06	1	2641900	6	977	58	2
2118400	39	572900	Thorndon-Tinakori Road	4703	Lambton Ward	47	Wellington City	09	Wellington Region	2.65934e+06	5.99118e+06	1	2118400	3	922	13	1
281403	111	513013	McLaren Park	602	Waitakere Ward	6	Waitakere City	02	Auckland Region	2.65448e+06	6.47695e+06	1	281403	8	1063	50	3
2511501	120	588300	Casebrook	6001	Shirley-Papanui Ward	60	Christchurch City	13	Canterbury Region	2.47743e+06	5.74714e+06	1	2511501	3	931	40	1
2903200	21	603100	Stuart St-Frederick St	7103	Cargill Ward	71	Dunedin City	14	Otago Region	2.31615e+06	5.47859e+06	1	2903200	8	1032	9	3
412200	261	514200	Newton	704	Hobson Ward	7	Auckland City	02	Auckland Region	2.66736e+06	6.48107e+06	1	412200	6	995	91	2
281509	279	513013	McLaren Park	602	Waitakere Ward	6	Waitakere City	02	Auckland Region	2.65484e+06	6.47674e+06	1	281509	9	1113	126	3
1198900	189	536821	Omanu	2301	Mount Maunganui-Papamoa Ward	23	Tauranga City	04	Bay of Plenty Region	2.79357e+06	6.38885e+06	1	1198900	4	941	66	2
2902900	24	603100	Stuart St-Frederick St	7103	Cargill Ward	71	Dunedin City	14	Otago Region	2.31624e+06	5.47892e+06	1	2902900	9	1128	11	3
544600	126	518101	Mt Eden North	703	Eden-Albert Ward	7	Auckland City	02	Auckland Region	2.66697e+06	6.47978e+06	1	544600	6	982	44	2
412302	162	514200	Newton	704	Hobson Ward	7	Auckland City	02	Auckland Region	2.6674e+06	6.48065e+06	1	412302	7	1005	57	2
413400	78	514000	Freemans Bay	701	Western Bays Ward	7	Auckland City	02	Auckland Region	2.66687e+06	6.48136e+06	1	413400	4	951	27	2
281506	279	513013	McLaren Park	602	Waitakere Ward	6	Waitakere City	02	Auckland Region	2.6548e+06	6.47651e+06	1	281506	9	1083	126	3
544000	162	518101	Mt Eden North	703	Eden-Albert Ward	7	Auckland City	02	Auckland Region	2.66702e+06	6.47951e+06	1	544000	5	970	57	2
1592400	36	551800	New Plymouth Central	3301	New Plymouth City Ward	33	New Plymouth District	07	Taranaki Region	2.60296e+06	6.23804e+06	1	1592400	6	999	13	2
544400	39	518101	Mt Eden North	703	Eden-Albert Ward	7	Auckland City	02	Auckland Region	2.66693e+06	6.47986e+06	1	544400	6	979	14	2
2509304	54	588101	Redwood North	6001	Shirley-Papanui Ward	60	Christchurch City	13	Canterbury Region	2.47916e+06	5.74787e+06	1	2509304	7	1003	19	2
413600	63	514000	Freemans Bay	701	Western Bays Ward	7	Auckland City	02	Auckland Region	2.66661e+06	6.48155e+06	1	413600	7	1011	22	2
543200	150	518101	Mt Eden North	703	Eden-Albert Ward	7	Auckland City	02	Auckland Region	2.66738e+06	6.47943e+06	1	543200	8	1044	68	3
1591900	15	551800	New Plymouth Central	3301	New Plymouth City Ward	33	New Plymouth District	07	Taranaki Region	2.60281e+06	6.23797e+06	1	1591900	6	999	5	2
1593000	60	551800	New Plymouth Central	3301	New Plymouth City Ward	33	New Plymouth District	07	Taranaki Region	2.60353e+06	6.23848e+06	1	1593000	6	981	21	2
1199100	132	536821	Omanu	2301	Mount Maunganui-Papamoa Ward	23	Tauranga City	04	Bay of Plenty Region	2.79347e+06	6.38851e+06	1	1199100	6	979	46	2
1199000	183	536821	Omanu	2301	Mount Maunganui-Papamoa Ward	23	Tauranga City	04	Bay of Plenty Region	2.7936e+06	6.38862e+06	1	1199000	4	952	64	2
2641300	180	594800	Barrington North	6006	Spreydon-Heathcote Ward	60	Christchurch City	13	Canterbury Region	2.47903e+06	5.73892e+06	1	2641300	8	1036	81	3
2510400	138	588300	Casebrook	6001	Shirley-Papanui Ward	60	Christchurch City	13	Canterbury Region	2.47775e+06	5.74661e+06	1	2510400	9	1129	62	3
413500	30	514000	Freemans Bay	701	Western Bays Ward	7	Auckland City	02	Auckland Region	2.66661e+06	6.48116e+06	1	413500	2	914	10	1
2903100	15	603100	Stuart St-Frederick St	7103	Cargill Ward	71	Dunedin City	14	Otago Region	2.3161e+06	5.4788e+06	1	2903100	8	1032	7	3
281200	84	513020	Opanuku	602	Waitakere Ward	6	Waitakere City	02	Auckland Region	2.65442e+06	6.4764e+06	1	281200	5	968	29	2
412301	153	514200	Newton	704	Hobson Ward	7	Auckland City	02	Auckland Region	2.66744e+06	6.48102e+06	1	412301	7	1016	54	2
2641702	39	594800	Barrington North	6006	Spreydon-Heathcote Ward	60	Christchurch City	13	Canterbury Region	2.47867e+06	5.73833e+06	1	2641702	9	1114	18	3
1593300	3	551800	New Plymouth Central	3301	New Plymouth City Ward	33	New Plymouth District	07	Taranaki Region	2.60367e+06	6.23842e+06	1	1593300	6	981	1	2
2641600	105	594800	Barrington North	6006	Spreydon-Heathcote Ward	60	Christchurch City	13	Canterbury Region	2.47877e+06	5.7386e+06	1	2641600	10	1142	47	3
413100	69	514000	Freemans Bay	701	Western Bays Ward	7	Auckland City	02	Auckland Region	2.66688e+06	6.48165e+06	1	413100	9	1122	31	3
2117100	45	572900	Thorndon-Tinakori Road	4703	Lambton Ward	47	Wellington City	09	Wellington Region	2.65941e+06	5.99202e+06	1	2117100	3	927	15	1
2510700	117	588300	Casebrook	6001	Shirley-Papanui Ward	60	Christchurch City	13	Canterbury Region	2.47757e+06	5.7466e+06	1	2510700	10	1249	53	3
2509600	156	588101	Redwood North	6001	Shirley-Papanui Ward	60	Christchurch City	13	Canterbury Region	2.47926e+06	5.7477e+06	1	2509600	5	960	55	2
2509500	57	588101	Redwood North	6001	Shirley-Papanui Ward	60	Christchurch City	13	Canterbury Region	2.47907e+06	5.74772e+06	1	2509500	5	968	20	2
413300	222	514000	Freemans Bay	701	Western Bays Ward	7	Auckland City	02	Auckland Region	2.66688e+06	6.4815e+06	1	413300	9	1122	100	3
281502	216	513013	McLaren Park	602	Waitakere Ward	6	Waitakere City	02	Auckland Region	2.65461e+06	6.47688e+06	1	281502	9	1099	97	3
2509302	288	588101	Redwood North	6001	Shirley-Papanui Ward	60	Christchurch City	13	Canterbury Region	2.47937e+06	5.74795e+06	1	2509302	7	1020	101	2
544200	12	518101	Mt Eden North	703	Eden-Albert Ward	7	Auckland City	02	Auckland Region	2.66658e+06	6.47981e+06	1	544200	4	948	4	2
281402	153	513013	McLaren Park	602	Waitakere Ward	6	Waitakere City	02	Auckland Region	2.65432e+06	6.47703e+06	1	281402	6	975	54	2
413000	363	514000	Freemans Bay	701	Western Bays Ward	7	Auckland City	02	Auckland Region	2.66673e+06	6.48163e+06	1	413000	8	1043	163	3
543400	276	518102	Sherbourne	703	Eden-Albert Ward	7	Auckland City	02	Auckland Region	2.66735e+06	6.47929e+06	1	543400	6	992	97	2
2122300	27	572900	Thorndon-Tinakori Road	4703	Lambton Ward	47	Wellington City	09	Wellington Region	2.65844e+06	5.99068e+06	1	2122300	4	947	9	2
1592500	3	551800	New Plymouth Central	3301	New Plymouth City Ward	33	New Plymouth District	07	Taranaki Region	2.60309e+06	6.23808e+06	1	1592500	6	999	1	2
2641800	84	594800	Barrington North	6006	Spreydon-Heathcote Ward	60	Christchurch City	13	Canterbury Region	2.47912e+06	5.73874e+06	1	2641800	4	948	29	2
412800	57	514200	Newton	704	Hobson Ward	7	Auckland City	02	Auckland Region	2.66705e+06	6.48067e+06	1	412800	7	1007	20	2
543600	51	518101	Mt Eden North	703	Eden-Albert Ward	7	Auckland City	02	Auckland Region	2.66717e+06	6.47978e+06	1	543600	2	915	17	1
412401	123	514200	Newton	704	Hobson Ward	7	Auckland City	02	Auckland Region	2.66733e+06	6.48067e+06	1	412401	3	921	41	1
412700	27	514200	Newton	704	Hobson Ward	7	Auckland City	02	Auckland Region	2.66716e+06	6.48062e+06	1	412700	6	984	9	2
544100	120	518101	Mt Eden North	703	Eden-Albert Ward	7	Auckland City	02	Auckland Region	2.66726e+06	6.47951e+06	1	544100	6	998	42	2
1592700	3	551800	New Plymouth Central	3301	New Plymouth City Ward	33	New Plymouth District	07	Taranaki Region	2.60313e+06	6.23801e+06	1	1592700	6	999	1	2
543700	180	518101	Mt Eden North	703	Eden-Albert Ward	7	Auckland City	02	Auckland Region	2.66712e+06	6.47969e+06	1	543700	5	962	63	2
1198601	150	536821	Omanu	2301	Mount Maunganui-Papamoa Ward	23	Tauranga City	04	Bay of Plenty Region	2.79315e+06	6.38844e+06	1	1198601	6	985	52	2
2510800	87	588300	Casebrook	6001	Shirley-Papanui Ward	60	Christchurch City	13	Canterbury Region	2.47736e+06	5.74638e+06	1	2510800	10	1249	39	3
544700	36	518101	Mt Eden North	703	Eden-Albert Ward	7	Auckland City	02	Auckland Region	2.66657e+06	6.4797e+06	1	544700	3	934	12	1
543500	102	518101	Mt Eden North	703	Eden-Albert Ward	7	Auckland City	02	Auckland Region	2.66721e+06	6.47983e+06	1	543500	4	950	36	2
412600	33	514200	Newton	704	Hobson Ward	7	Auckland City	02	Auckland Region	2.66719e+06	6.48073e+06	1	412600	6	984	12	2
543300	102	518102	Sherbourne	703	Eden-Albert Ward	7	Auckland City	02	Auckland Region	2.66718e+06	6.4793e+06	1	543300	7	1014	36	2
1592000	3	551800	New Plymouth Central	3301	New Plymouth City Ward	33	New Plymouth District	07	Taranaki Region	2.60285e+06	6.2379e+06	1	1592000	6	999	1	2
1592900	3	551800	New Plymouth Central	3301	New Plymouth City Ward	33	New Plymouth District	07	Taranaki Region	2.6032e+06	6.23791e+06	1	1592900	6	999	1	2
1592800	3	551800	New Plymouth Central	3301	New Plymouth City Ward	33	New Plymouth District	07	Taranaki Region	2.60306e+06	6.23786e+06	1	1592800	6	999	1	2
281510	162	513013	McLaren Park	602	Waitakere Ward	6	Waitakere City	02	Auckland Region	2.65463e+06	6.47668e+06	1	281510	9	1107	73	3
1198602	195	536821	Omanu	2301	Mount Maunganui-Papamoa Ward	23	Tauranga City	04	Bay of Plenty Region	2.79337e+06	6.38835e+06	1	1198602	3	919	64	1
1199201	195	536821	Omanu	2301	Mount Maunganui-Papamoa Ward	23	Tauranga City	04	Bay of Plenty Region	2.79379e+06	6.38835e+06	1	1199201	5	965	68	2
2510600	219	588300	Casebrook	6001	Shirley-Papanui Ward	60	Christchurch City	13	Canterbury Region	2.47745e+06	5.74658e+06	1	2510600	10	1139	99	3
416100	69	514000	Freemans Bay	701	Western Bays Ward	7	Auckland City	02	Auckland Region	2.66629e+06	6.48207e+06	1	416100	7	1000	24	2
546500	120	518102	Sherbourne	703	Eden-Albert Ward	7	Auckland City	02	Auckland Region	2.66729e+06	6.47902e+06	1	546500	5	956	42	2
415600	147	514000	Freemans Bay	701	Western Bays Ward	7	Auckland City	02	Auckland Region	2.66605e+06	6.48199e+06	1	415600	5	966	51	2
1595200	105	552002	Marsland Hill	3301	New Plymouth City Ward	33	New Plymouth District	07	Taranaki Region	2.60348e+06	6.23771e+06	1	1595200	6	988	37	2
2119700	27	572900	Thorndon-Tinakori Road	4703	Lambton Ward	47	Wellington City	09	Wellington Region	2.65878e+06	5.99074e+06	1	2119700	5	967	9	2
1596500	123	552001	Mount Bryan	3301	New Plymouth City Ward	33	New Plymouth District	07	Taranaki Region	2.60433e+06	6.23828e+06	1	1596500	7	1013	43	2
2120400	93	572900	Thorndon-Tinakori Road	4703	Lambton Ward	47	Wellington City	09	Wellington Region	2.65889e+06	5.99141e+06	1	2120400	5	962	33	2
417000	156	514000	Freemans Bay	701	Western Bays Ward	7	Auckland City	02	Auckland Region	2.6665e+06	6.48191e+06	1	417000	2	901	51	1
2644900	183	595000	Spreydon	6006	Spreydon-Heathcote Ward	60	Christchurch City	13	Canterbury Region	2.47994e+06	5.73942e+06	1	2644900	7	1003	64	2
2644600	93	595000	Spreydon	6006	Spreydon-Heathcote Ward	60	Christchurch City	13	Canterbury Region	2.47977e+06	5.73918e+06	1	2644600	7	1001	33	2
1202800	6	536810	Mt Maunganui North	2301	Mount Maunganui-Papamoa Ward	23	Tauranga City	04	Bay of Plenty Region	2.79125e+06	6.39052e+06	1	1202800	10	1181	3	3
1202901	15	536810	Mt Maunganui North	2301	Mount Maunganui-Papamoa Ward	23	Tauranga City	04	Bay of Plenty Region	2.79138e+06	6.39039e+06	1	1202901	10	1181	7	3
547700	240	518201	Balmoral	703	Eden-Albert Ward	7	Auckland City	02	Auckland Region	2.66705e+06	6.47859e+06	1	547700	5	972	84	2
545000	174	518101	Mt Eden North	703	Eden-Albert Ward	7	Auckland City	02	Auckland Region	2.66686e+06	6.47963e+06	1	545000	6	985	61	2
1594000	24	551800	New Plymouth Central	3301	New Plymouth City Ward	33	New Plymouth District	07	Taranaki Region	2.60361e+06	6.23818e+06	1	1594000	7	1013	8	2
2118800	6	572900	Thorndon-Tinakori Road	4703	Lambton Ward	47	Wellington City	09	Wellington Region	2.65909e+06	5.99101e+06	1	2118800	3	931	2	1
2119000	33	572900	Thorndon-Tinakori Road	4703	Lambton Ward	47	Wellington City	09	Wellington Region	2.65909e+06	5.99096e+06	1	2119000	3	931	11	1
414700	69	514000	Freemans Bay	701	Western Bays Ward	7	Auckland City	02	Auckland Region	2.66626e+06	6.48184e+06	1	414700	2	904	23	1
1200800	153	536831	Arataki	2301	Mount Maunganui-Papamoa Ward	23	Tauranga City	04	Bay of Plenty Region	2.79387e+06	6.38735e+06	1	1200800	10	1323	69	3
2118500	6	572900	Thorndon-Tinakori Road	4703	Lambton Ward	47	Wellington City	09	Wellington Region	2.65905e+06	5.99137e+06	1	2118500	3	931	2	1
1200300	162	536821	Omanu	2301	Mount Maunganui-Papamoa Ward	23	Tauranga City	04	Bay of Plenty Region	2.7937e+06	6.3878e+06	1	1200300	3	924	53	1
414900	60	514000	Freemans Bay	701	Western Bays Ward	7	Auckland City	02	Auckland Region	2.66613e+06	6.48166e+06	1	414900	2	904	20	1
413700	135	514000	Freemans Bay	701	Western Bays Ward	7	Auckland City	02	Auckland Region	2.6665e+06	6.48139e+06	1	413700	2	916	45	1
414500	30	514000	Freemans Bay	701	Western Bays Ward	7	Auckland City	02	Auckland Region	2.66627e+06	6.48127e+06	1	414500	3	924	10	1
415000	60	514000	Freemans Bay	701	Western Bays Ward	7	Auckland City	02	Auckland Region	2.66616e+06	6.48158e+06	1	415000	1	895	20	1
1593900	6	551800	New Plymouth Central	3301	New Plymouth City Ward	33	New Plymouth District	07	Taranaki Region	2.60332e+06	6.23808e+06	1	1593900	7	1013	2	2
2118300	201	572900	Thorndon-Tinakori Road	4703	Lambton Ward	47	Wellington City	09	Wellington Region	2.6593e+06	5.99086e+06	1	2118300	4	940	70	2
2643200	36	595000	Spreydon	6006	Spreydon-Heathcote Ward	60	Christchurch City	13	Canterbury Region	2.47931e+06	5.73902e+06	1	2643200	7	1004	13	2
2511700	195	588300	Casebrook	6001	Shirley-Papanui Ward	60	Christchurch City	13	Canterbury Region	2.47795e+06	5.74684e+06	1	2511700	9	1102	88	3
2512000	192	588200	Styx Mill	6001	Shirley-Papanui Ward	60	Christchurch City	13	Canterbury Region	2.47823e+06	5.74726e+06	1	2512000	4	953	67	2
2904100	180	603100	Stuart St-Frederick St	7103	Cargill Ward	71	Dunedin City	14	Otago Region	2.31619e+06	5.47929e+06	1	2904100	6	995	63	2
413800	45	514000	Freemans Bay	701	Western Bays Ward	7	Auckland City	02	Auckland Region	2.66665e+06	6.48107e+06	1	413800	7	1011	16	2
545800	54	518102	Sherbourne	703	Eden-Albert Ward	7	Auckland City	02	Auckland Region	2.66666e+06	6.47948e+06	1	545800	3	924	18	1
544900	150	518101	Mt Eden North	703	Eden-Albert Ward	7	Auckland City	02	Auckland Region	2.66672e+06	6.47964e+06	1	544900	7	1014	52	2
1594600	39	551800	New Plymouth Central	3301	New Plymouth City Ward	33	New Plymouth District	07	Taranaki Region	2.60363e+06	6.23798e+06	1	1594600	6	981	14	2
1593500	9	551800	New Plymouth Central	3301	New Plymouth City Ward	33	New Plymouth District	07	Taranaki Region	2.60394e+06	6.23853e+06	1	1593500	6	981	3	2
546400	141	518102	Sherbourne	703	Eden-Albert Ward	7	Auckland City	02	Auckland Region	2.66752e+06	6.47919e+06	1	546400	6	975	49	2
545300	123	518102	Sherbourne	703	Eden-Albert Ward	7	Auckland City	02	Auckland Region	2.66696e+06	6.47936e+06	1	545300	6	991	43	2
413900	120	514000	Freemans Bay	701	Western Bays Ward	7	Auckland City	02	Auckland Region	2.66681e+06	6.48114e+06	1	413900	2	913	40	1
1200401	207	536831	Arataki	2301	Mount Maunganui-Papamoa Ward	23	Tauranga City	04	Bay of Plenty Region	2.79411e+06	6.3875e+06	1	1200401	6	976	72	2
1200600	141	536821	Omanu	2301	Mount Maunganui-Papamoa Ward	23	Tauranga City	04	Bay of Plenty Region	2.79355e+06	6.38763e+06	1	1200600	9	1109	63	3
1200700	156	536821	Omanu	2301	Mount Maunganui-Papamoa Ward	23	Tauranga City	04	Bay of Plenty Region	2.79374e+06	6.38759e+06	1	1200700	7	1028	55	2
2642003	36	594800	Barrington North	6006	Spreydon-Heathcote Ward	60	Christchurch City	13	Canterbury Region	2.47932e+06	5.73863e+06	1	2642003	4	940	13	2
2511100	132	588300	Casebrook	6001	Shirley-Papanui Ward	60	Christchurch City	13	Canterbury Region	2.47752e+06	5.74614e+06	1	2511100	10	1141	59	3
2643300	78	595000	Spreydon	6006	Spreydon-Heathcote Ward	60	Christchurch City	13	Canterbury Region	2.47942e+06	5.73888e+06	1	2643300	6	980	27	2
414200	141	514000	Freemans Bay	701	Western Bays Ward	7	Auckland City	02	Auckland Region	2.66644e+06	6.48152e+06	1	414200	5	954	49	2
414300	63	514000	Freemans Bay	701	Western Bays Ward	7	Auckland City	02	Auckland Region	2.66639e+06	6.48138e+06	1	414300	5	954	22	2
2511601	126	588300	Casebrook	6001	Shirley-Papanui Ward	60	Christchurch City	13	Canterbury Region	2.47779e+06	5.74716e+06	1	2511601	8	1036	57	3
2511602	183	588300	Casebrook	6001	Shirley-Papanui Ward	60	Christchurch City	13	Canterbury Region	2.47806e+06	5.74711e+06	1	2511602	8	1043	82	3
2511502	201	588300	Casebrook	6001	Shirley-Papanui Ward	60	Christchurch City	13	Canterbury Region	2.47766e+06	5.74708e+06	1	2511502	6	992	70	2
1725900	138	556200	Gonville South	3702	Urban Ward	37	Wanganui District	08	Manawatu-Wanganui Region	2.68375e+06	6.1379e+06	1	1725900	8	1052	62	3
545700	180	518102	Sherbourne	703	Eden-Albert Ward	7	Auckland City	02	Auckland Region	2.66696e+06	6.47918e+06	1	545700	6	982	63	2
2118900	39	572900	Thorndon-Tinakori Road	4703	Lambton Ward	47	Wellington City	09	Wellington Region	2.65918e+06	5.99107e+06	1	2118900	3	931	13	1
2118100	60	572900	Thorndon-Tinakori Road	4703	Lambton Ward	47	Wellington City	09	Wellington Region	2.65931e+06	5.99104e+06	1	2118100	3	927	20	1
2642001	42	594800	Barrington North	6006	Spreydon-Heathcote Ward	60	Christchurch City	13	Canterbury Region	2.47907e+06	5.73853e+06	1	2642001	4	940	15	2
1200200	171	536821	Omanu	2301	Mount Maunganui-Papamoa Ward	23	Tauranga City	04	Bay of Plenty Region	2.79337e+06	6.38787e+06	1	1200200	10	1158	77	3
545200	108	518102	Sherbourne	703	Eden-Albert Ward	7	Auckland City	02	Auckland Region	2.66687e+06	6.4794e+06	1	545200	4	944	38	2
2122500	147	572900	Thorndon-Tinakori Road	4703	Lambton Ward	47	Wellington City	09	Wellington Region	2.65901e+06	5.99064e+06	1	2122500	6	985	51	2
1594900	63	552002	Marsland Hill	3301	New Plymouth City Ward	33	New Plymouth District	07	Taranaki Region	2.60402e+06	6.23812e+06	1	1594900	9	1077	28	3
2118200	93	572900	Thorndon-Tinakori Road	4703	Lambton Ward	47	Wellington City	09	Wellington Region	2.65934e+06	5.99096e+06	1	2118200	4	938	33	2
414800	90	514000	Freemans Bay	701	Western Bays Ward	7	Auckland City	02	Auckland Region	2.66629e+06	6.48176e+06	1	414800	2	914	30	1
2188102	120	576001	Island Bay West	4705	Southern Ward	47	Wellington City	09	Wellington Region	2.65795e+06	5.98374e+06	1	2188102	3	935	40	1
414400	60	514000	Freemans Bay	701	Western Bays Ward	7	Auckland City	02	Auckland Region	2.66633e+06	6.48131e+06	1	414400	3	924	20	1
415100	192	514000	Freemans Bay	701	Western Bays Ward	7	Auckland City	02	Auckland Region	2.66634e+06	6.48169e+06	1	415100	8	1032	86	3
545500	72	518102	Sherbourne	703	Eden-Albert Ward	7	Auckland City	02	Auckland Region	2.6668e+06	6.47925e+06	1	545500	4	948	25	2
414100	129	514000	Freemans Bay	701	Western Bays Ward	7	Auckland City	02	Auckland Region	2.66633e+06	6.48158e+06	1	414100	3	931	43	1
1594800	33	552002	Marsland Hill	3301	New Plymouth City Ward	33	New Plymouth District	07	Taranaki Region	2.60379e+06	6.23804e+06	1	1594800	9	1077	15	3
2118600	9	572900	Thorndon-Tinakori Road	4703	Lambton Ward	47	Wellington City	09	Wellington Region	2.65903e+06	5.99116e+06	1	2118600	3	931	3	1
2118000	171	572900	Thorndon-Tinakori Road	4703	Lambton Ward	47	Wellington City	09	Wellington Region	2.65924e+06	5.99117e+06	1	2118000	4	939	60	2
2512400	198	588200	Styx Mill	6001	Shirley-Papanui Ward	60	Christchurch City	13	Canterbury Region	2.47889e+06	5.74731e+06	1	2512400	9	1096	89	3
2512200	81	588200	Styx Mill	6001	Shirley-Papanui Ward	60	Christchurch City	13	Canterbury Region	2.47846e+06	5.74728e+06	1	2512200	10	1196	36	3
415300	27	514000	Freemans Bay	701	Western Bays Ward	7	Auckland City	02	Auckland Region	2.66656e+06	6.48176e+06	1	415300	2	914	9	1
544800	15	518101	Mt Eden North	703	Eden-Albert Ward	7	Auckland City	02	Auckland Region	2.66656e+06	6.4796e+06	1	544800	6	979	5	2
545100	123	518102	Sherbourne	703	Eden-Albert Ward	7	Auckland City	02	Auckland Region	2.66675e+06	6.47944e+06	1	545100	6	990	43	2
415200	21	514000	Freemans Bay	701	Western Bays Ward	7	Auckland City	02	Auckland Region	2.66649e+06	6.4817e+06	1	415200	2	900	7	1
545400	111	518102	Sherbourne	703	Eden-Albert Ward	7	Auckland City	02	Auckland Region	2.66707e+06	6.47933e+06	1	545400	6	987	39	2
414000	114	514000	Freemans Bay	701	Western Bays Ward	7	Auckland City	02	Auckland Region	2.66618e+06	6.48145e+06	1	414000	3	924	38	1
1594500	15	551800	New Plymouth Central	3301	New Plymouth City Ward	33	New Plymouth District	07	Taranaki Region	2.60342e+06	6.2379e+06	1	1594500	6	981	5	2
546300	78	518102	Sherbourne	703	Eden-Albert Ward	7	Auckland City	02	Auckland Region	2.66734e+06	6.47913e+06	1	546300	3	924	26	1
2642002	57	594800	Barrington North	6006	Spreydon-Heathcote Ward	60	Christchurch City	13	Canterbury Region	2.4792e+06	5.73856e+06	1	2642002	4	940	20	2
2511000	117	588300	Casebrook	6001	Shirley-Papanui Ward	60	Christchurch City	13	Canterbury Region	2.47729e+06	5.74627e+06	1	2511000	8	1036	53	3
2511800	129	588300	Casebrook	6001	Shirley-Papanui Ward	60	Christchurch City	13	Canterbury Region	2.47794e+06	5.74662e+06	1	2511800	8	1059	58	3
681308	3	522722	Aberfeldy	806	Howick Ward	8	Manukau City	02	Auckland Region	2.68045e+06	6.47628e+06	1	681308	8	1032	1	3
2121300	3	572900	Thorndon-Tinakori Road	4703	Lambton Ward	47	Wellington City	09	Wellington Region	2.65888e+06	5.99074e+06	1	2121300	7	1009	1	2
1598000	9	552100	Fitzroy	3301	New Plymouth City Ward	33	New Plymouth District	07	Taranaki Region	2.60482e+06	6.23829e+06	1	1598000	4	944	3	2
2513000	183	588200	Styx Mill	6001	Shirley-Papanui Ward	60	Christchurch City	13	Canterbury Region	2.47874e+06	5.74805e+06	1	2513000	3	924	60	1
2513100	141	588200	Styx Mill	6001	Shirley-Papanui Ward	60	Christchurch City	13	Canterbury Region	2.47893e+06	5.74809e+06	1	2513100	5	956	49	2
416600	108	514000	Freemans Bay	701	Western Bays Ward	7	Auckland City	02	Auckland Region	2.66652e+06	6.48214e+06	1	416600	2	903	36	1
415900	12	514000	Freemans Bay	701	Western Bays Ward	7	Auckland City	02	Auckland Region	2.66627e+06	6.48217e+06	1	415900	3	920	4	1
678502	132	522603	Bleakhouse	806	Howick Ward	8	Manukau City	02	Auckland Region	2.68171e+06	6.47782e+06	1	678502	1	886	44	1
416200	36	514000	Freemans Bay	701	Western Bays Ward	7	Auckland City	02	Auckland Region	2.66618e+06	6.4821e+06	1	416200	8	1060	16	3
547100	111	518102	Sherbourne	703	Eden-Albert Ward	7	Auckland City	02	Auckland Region	2.66733e+06	6.47887e+06	1	547100	7	1017	39	2
415800	60	514000	Freemans Bay	701	Western Bays Ward	7	Auckland City	02	Auckland Region	2.66617e+06	6.4822e+06	1	415800	3	920	20	1
1595500	141	552002	Marsland Hill	3301	New Plymouth City Ward	33	New Plymouth District	07	Taranaki Region	2.6038e+06	6.23762e+06	1	1595500	1	886	47	1
1596600	96	552001	Mount Bryan	3301	New Plymouth City Ward	33	New Plymouth District	07	Taranaki Region	2.60437e+06	6.23813e+06	1	1596600	5	967	34	2
1595300	81	552002	Marsland Hill	3301	New Plymouth City Ward	33	New Plymouth District	07	Taranaki Region	2.60323e+06	6.23764e+06	1	1595300	8	1042	36	3
2119400	33	572900	Thorndon-Tinakori Road	4703	Lambton Ward	47	Wellington City	09	Wellington Region	2.65883e+06	5.99098e+06	1	2119400	6	977	12	2
678801	285	522603	Bleakhouse	806	Howick Ward	8	Manukau City	02	Auckland Region	2.68176e+06	6.47758e+06	1	678801	4	935	100	2
2645200	123	595400	Somerfield	6006	Spreydon-Heathcote Ward	60	Christchurch City	13	Canterbury Region	2.47949e+06	5.73879e+06	1	2645200	4	936	43	2
1202902	63	536810	Mt Maunganui North	2301	Mount Maunganui-Papamoa Ward	23	Tauranga City	04	Bay of Plenty Region	2.79154e+06	6.39034e+06	1	1202902	10	1181	28	3
678602	45	522603	Bleakhouse	806	Howick Ward	8	Manukau City	02	Auckland Region	2.68197e+06	6.47768e+06	1	678602	1	886	15	1
415400	57	514000	Freemans Bay	701	Western Bays Ward	7	Auckland City	02	Auckland Region	2.66602e+06	6.48225e+06	1	415400	2	900	19	1
1726300	81	556200	Gonville South	3702	Urban Ward	37	Wanganui District	08	Manawatu-Wanganui Region	2.68411e+06	6.13838e+06	1	1726300	6	994	28	2
678601	126	522603	Bleakhouse	806	Howick Ward	8	Manukau City	02	Auckland Region	2.68201e+06	6.47781e+06	1	678601	1	886	42	1
1595000	162	552002	Marsland Hill	3301	New Plymouth City Ward	33	New Plymouth District	07	Taranaki Region	2.60403e+06	6.23798e+06	1	1595000	8	1048	73	3
1596000	150	552001	Mount Bryan	3301	New Plymouth City Ward	33	New Plymouth District	07	Taranaki Region	2.60412e+06	6.23866e+06	1	1596000	5	957	52	2
1595800	150	552001	Mount Bryan	3301	New Plymouth City Ward	33	New Plymouth District	07	Taranaki Region	2.60382e+06	6.23868e+06	1	1595800	7	1007	52	2
2645100	150	595400	Somerfield	6006	Spreydon-Heathcote Ward	60	Christchurch City	13	Canterbury Region	2.47978e+06	5.73903e+06	1	2645100	6	983	52	2
2644400	84	595000	Spreydon	6006	Spreydon-Heathcote Ward	60	Christchurch City	13	Canterbury Region	2.47957e+06	5.73904e+06	1	2644400	7	1001	29	2
416900	102	514000	Freemans Bay	701	Western Bays Ward	7	Auckland City	02	Auckland Region	2.66643e+06	6.482e+06	1	416900	4	942	36	2
546700	168	518102	Sherbourne	703	Eden-Albert Ward	7	Auckland City	02	Auckland Region	2.66752e+06	6.47871e+06	1	546700	4	947	59	2
1726500	54	556200	Gonville South	3702	Urban Ward	37	Wanganui District	08	Manawatu-Wanganui Region	2.68421e+06	6.13812e+06	1	1726500	7	1010	19	2
1727400	36	557000	Spriggens Park	3702	Urban Ward	37	Wanganui District	08	Manawatu-Wanganui Region	2.68456e+06	6.13825e+06	1	1727400	9	1131	16	3
416300	93	514000	Freemans Bay	701	Western Bays Ward	7	Auckland City	02	Auckland Region	2.66619e+06	6.482e+06	1	416300	8	1060	42	3
1595100	108	552002	Marsland Hill	3301	New Plymouth City Ward	33	New Plymouth District	07	Taranaki Region	2.60375e+06	6.23791e+06	1	1595100	7	1021	38	2
2120000	78	572900	Thorndon-Tinakori Road	4703	Lambton Ward	47	Wellington City	09	Wellington Region	2.65863e+06	5.99076e+06	1	2120000	5	967	27	2
1596300	123	552001	Mount Bryan	3301	New Plymouth City Ward	33	New Plymouth District	07	Taranaki Region	2.60449e+06	6.23846e+06	1	1596300	5	962	43	2
1596100	39	552001	Mount Bryan	3301	New Plymouth City Ward	33	New Plymouth District	07	Taranaki Region	2.60419e+06	6.23851e+06	1	1596100	5	967	14	2
416700	66	514000	Freemans Bay	701	Western Bays Ward	7	Auckland City	02	Auckland Region	2.66664e+06	6.4821e+06	1	416700	2	900	22	1
2512900	219	588200	Styx Mill	6001	Shirley-Papanui Ward	60	Christchurch City	13	Canterbury Region	2.47892e+06	5.74833e+06	1	2512900	5	972	77	2
678400	237	522603	Bleakhouse	806	Howick Ward	8	Manukau City	02	Auckland Region	2.68192e+06	6.47806e+06	1	678400	1	884	78	1
547002	60	518102	Sherbourne	703	Eden-Albert Ward	7	Auckland City	02	Auckland Region	2.66715e+06	6.47877e+06	1	547002	7	1000	21	2
2079000	93	573800	Johnsonville East	4701	Northern Ward	47	Wellington City	09	Wellington Region	2.66186e+06	5.997e+06	1	2079000	4	953	33	2
678200	201	522603	Bleakhouse	806	Howick Ward	8	Manukau City	02	Auckland Region	2.68177e+06	6.4783e+06	1	678200	1	896	66	1
1595400	117	552002	Marsland Hill	3301	New Plymouth City Ward	33	New Plymouth District	07	Taranaki Region	2.6038e+06	6.23779e+06	1	1595400	4	938	41	2
2120100	45	572900	Thorndon-Tinakori Road	4703	Lambton Ward	47	Wellington City	09	Wellington Region	2.65846e+06	5.99074e+06	1	2120100	5	967	16	2
2119900	15	572900	Thorndon-Tinakori Road	4703	Lambton Ward	47	Wellington City	09	Wellington Region	2.65868e+06	5.99072e+06	1	2119900	5	967	5	2
2120900	138	572900	Thorndon-Tinakori Road	4703	Lambton Ward	47	Wellington City	09	Wellington Region	2.65866e+06	5.9911e+06	1	2120900	4	950	48	2
1596400	69	552001	Mount Bryan	3301	New Plymouth City Ward	33	New Plymouth District	07	Taranaki Region	2.60425e+06	6.23842e+06	1	1596400	7	1009	24	2
2120300	84	572900	Thorndon-Tinakori Road	4703	Lambton Ward	47	Wellington City	09	Wellington Region	2.65903e+06	5.99151e+06	1	2120300	2	904	28	1
2644500	105	595000	Spreydon	6006	Spreydon-Heathcote Ward	60	Christchurch City	13	Canterbury Region	2.47966e+06	5.7392e+06	1	2644500	9	1126	47	3
1202700	6	536810	Mt Maunganui North	2301	Mount Maunganui-Papamoa Ward	23	Tauranga City	04	Bay of Plenty Region	2.79122e+06	6.39063e+06	1	1202700	10	1181	3	3
1726700	48	556200	Gonville South	3702	Urban Ward	37	Wanganui District	08	Manawatu-Wanganui Region	2.68444e+06	6.13811e+06	1	1726700	6	994	17	2
1726200	69	556200	Gonville South	3702	Urban Ward	37	Wanganui District	08	Manawatu-Wanganui Region	2.68413e+06	6.13789e+06	1	1726200	9	1101	31	3
416000	165	514000	Freemans Bay	701	Western Bays Ward	7	Auckland City	02	Auckland Region	2.66637e+06	6.48216e+06	1	416000	7	1000	58	2
1727300	3	557000	Spriggens Park	3702	Urban Ward	37	Wanganui District	08	Manawatu-Wanganui Region	2.68499e+06	6.13854e+06	1	1727300	9	1075	1	3
2091400	120	574302	Te Kainga	4702	Onslow-Western Ward	47	Wellington City	09	Wellington Region	2.66031e+06	5.99378e+06	1	2091400	1	855	40	1
1726900	123	557000	Spriggens Park	3702	Urban Ward	37	Wanganui District	08	Manawatu-Wanganui Region	2.68435e+06	6.13852e+06	1	1726900	9	1074	55	3
547400	153	518201	Balmoral	703	Eden-Albert Ward	7	Auckland City	02	Auckland Region	2.66696e+06	6.47878e+06	1	547400	4	936	54	2
546800	204	518102	Sherbourne	703	Eden-Albert Ward	7	Auckland City	02	Auckland Region	2.66714e+06	6.47909e+06	1	546800	6	978	71	2
678802	39	522603	Bleakhouse	806	Howick Ward	8	Manukau City	02	Auckland Region	2.68201e+06	6.47759e+06	1	678802	1	891	13	1
2121000	159	572900	Thorndon-Tinakori Road	4703	Lambton Ward	47	Wellington City	09	Wellington Region	2.65859e+06	5.99101e+06	1	2121000	3	926	52	1
2120500	99	572900	Thorndon-Tinakori Road	4703	Lambton Ward	47	Wellington City	09	Wellington Region	2.65894e+06	5.99136e+06	1	2120500	3	927	33	1
1726100	75	556200	Gonville South	3702	Urban Ward	37	Wanganui District	08	Manawatu-Wanganui Region	2.68383e+06	6.13766e+06	1	1726100	7	1022	26	2
1727100	30	557000	Spriggens Park	3702	Urban Ward	37	Wanganui District	08	Manawatu-Wanganui Region	2.68459e+06	6.13844e+06	1	1727100	9	1131	14	3
1727000	87	557000	Spriggens Park	3702	Urban Ward	37	Wanganui District	08	Manawatu-Wanganui Region	2.68468e+06	6.13882e+06	1	1727000	8	1071	39	3
416500	48	514000	Freemans Bay	701	Western Bays Ward	7	Auckland City	02	Auckland Region	2.6664e+06	6.48204e+06	1	416500	2	916	16	1
964900	63	527503	Cambridge Central	1702	Cambridge Ward	17	Waipa District	03	Waikato Region	2.7272e+06	6.36466e+06	1	964900	6	985	22	2
1595600	132	552002	Marsland Hill	3301	New Plymouth City Ward	33	New Plymouth District	07	Taranaki Region	2.60348e+06	6.23757e+06	1	1595600	4	945	46	2
2119600	36	572900	Thorndon-Tinakori Road	4703	Lambton Ward	47	Wellington City	09	Wellington Region	2.65889e+06	5.99096e+06	1	2119600	6	977	13	2
416800	48	514000	Freemans Bay	701	Western Bays Ward	7	Auckland City	02	Auckland Region	2.66669e+06	6.48198e+06	1	416800	2	900	16	1
1203000	141	536810	Mt Maunganui North	2301	Mount Maunganui-Papamoa Ward	23	Tauranga City	04	Bay of Plenty Region	2.7915e+06	6.39012e+06	1	1203000	7	1024	49	2
415500	78	514000	Freemans Bay	701	Western Bays Ward	7	Auckland City	02	Auckland Region	2.66601e+06	6.48216e+06	1	415500	3	920	26	1
546900	96	518102	Sherbourne	703	Eden-Albert Ward	7	Auckland City	02	Auckland Region	2.66708e+06	6.4789e+06	1	546900	4	944	34	2
417100	51	514000	Freemans Bay	701	Western Bays Ward	7	Auckland City	02	Auckland Region	2.66661e+06	6.48188e+06	1	417100	6	975	18	2
547200	111	518102	Sherbourne	703	Eden-Albert Ward	7	Auckland City	02	Auckland Region	2.66734e+06	6.47871e+06	1	547200	6	981	39	2
1596200	12	552001	Mount Bryan	3301	New Plymouth City Ward	33	New Plymouth District	07	Taranaki Region	2.60446e+06	6.23857e+06	1	1596200	5	967	4	2
1595900	66	552001	Mount Bryan	3301	New Plymouth City Ward	33	New Plymouth District	07	Taranaki Region	2.60385e+06	6.2386e+06	1	1595900	5	958	23	2
1595700	57	552001	Mount Bryan	3301	New Plymouth City Ward	33	New Plymouth District	07	Taranaki Region	2.60355e+06	6.23858e+06	1	1595700	7	1007	20	2
2120700	126	572900	Thorndon-Tinakori Road	4703	Lambton Ward	47	Wellington City	09	Wellington Region	2.65875e+06	5.99123e+06	1	2120700	6	985	44	2
2645300	111	595400	Somerfield	6006	Spreydon-Heathcote Ward	60	Christchurch City	13	Canterbury Region	2.47987e+06	5.73895e+06	1	2645300	7	1029	39	2
546600	93	518102	Sherbourne	703	Eden-Albert Ward	7	Auckland City	02	Auckland Region	2.66746e+06	6.47901e+06	1	546600	6	989	33	2
1203204	108	536810	Mt Maunganui North	2301	Mount Maunganui-Papamoa Ward	23	Tauranga City	04	Bay of Plenty Region	2.79161e+06	6.3899e+06	1	1203204	8	1050	49	3
2644300	129	595000	Spreydon	6006	Spreydon-Heathcote Ward	60	Christchurch City	13	Canterbury Region	2.47956e+06	5.73926e+06	1	2644300	5	962	45	2
1726600	138	556200	Gonville South	3702	Urban Ward	37	Wanganui District	08	Manawatu-Wanganui Region	2.68432e+06	6.13807e+06	1	1726600	8	1030	62	3
1726400	126	556200	Gonville South	3702	Urban Ward	37	Wanganui District	08	Manawatu-Wanganui Region	2.68386e+06	6.13802e+06	1	1726400	7	1010	44	2
416400	78	514000	Freemans Bay	701	Western Bays Ward	7	Auckland City	02	Auckland Region	2.66625e+06	6.48195e+06	1	416400	2	916	26	1
678501	222	522603	Bleakhouse	806	Howick Ward	8	Manukau City	02	Auckland Region	2.68166e+06	6.478e+06	1	678501	1	896	73	1
547001	102	518102	Sherbourne	703	Eden-Albert Ward	7	Auckland City	02	Auckland Region	2.66724e+06	6.47892e+06	1	547001	7	1000	36	2
2120200	30	572900	Thorndon-Tinakori Road	4703	Lambton Ward	47	Wellington City	09	Wellington Region	2.65895e+06	5.99159e+06	1	2120200	5	962	10	2
419300	30	515500	Arch Hill	701	Western Bays Ward	7	Auckland City	02	Auckland Region	2.66598e+06	6.48009e+06	1	419300	3	918	10	1
550400	99	518202	Mt Eden East	703	Eden-Albert Ward	7	Auckland City	02	Auckland Region	2.66727e+06	6.4783e+06	1	550400	5	959	35	2
681338	150	522722	Aberfeldy	806	Howick Ward	8	Manukau City	02	Auckland Region	2.68043e+06	6.4751e+06	1	681338	4	949	52	2
2516900	171	589000	Wairarapa	6002	Fendalton-Waimairi Ward	60	Christchurch City	13	Canterbury Region	2.47626e+06	5.74524e+06	1	2516900	4	939	60	2
419400	129	515500	Arch Hill	701	Western Bays Ward	7	Auckland City	02	Auckland Region	2.66609e+06	6.48016e+06	1	419400	3	920	43	1
681329	159	522722	Aberfeldy	806	Howick Ward	8	Manukau City	02	Auckland Region	2.68054e+06	6.47593e+06	1	681329	7	1017	56	2
549600	66	518201	Balmoral	703	Eden-Albert Ward	7	Auckland City	02	Auckland Region	2.6669e+06	6.47829e+06	1	549600	5	954	23	2
1598102	45	552100	Fitzroy	3301	New Plymouth City Ward	33	New Plymouth District	07	Taranaki Region	2.6051e+06	6.23826e+06	1	1598102	5	961	16	2
1597000	75	552100	Fitzroy	3301	New Plymouth City Ward	33	New Plymouth District	07	Taranaki Region	2.60475e+06	6.23881e+06	1	1597000	3	931	25	1
1204401	12	536821	Omanu	2301	Mount Maunganui-Papamoa Ward	23	Tauranga City	04	Bay of Plenty Region	2.79308e+06	6.38768e+06	1	1204401	8	1035	5	3
1203600	24	536821	Omanu	2301	Mount Maunganui-Papamoa Ward	23	Tauranga City	04	Bay of Plenty Region	2.79213e+06	6.38895e+06	1	1203600	7	1024	8	2
417300	33	514000	Freemans Bay	701	Western Bays Ward	7	Auckland City	02	Auckland Region	2.66674e+06	6.48177e+06	1	417300	6	975	12	2
1597300	132	552100	Fitzroy	3301	New Plymouth City Ward	33	New Plymouth District	07	Taranaki Region	2.60516e+06	6.2387e+06	1	1597300	7	1026	46	2
1597100	45	552100	Fitzroy	3301	New Plymouth City Ward	33	New Plymouth District	07	Taranaki Region	2.60458e+06	6.23869e+06	1	1597100	3	931	15	1
418500	18	515500	Arch Hill	701	Western Bays Ward	7	Auckland City	02	Auckland Region	2.66619e+06	6.48017e+06	1	418500	5	966	6	2
2121200	144	572900	Thorndon-Tinakori Road	4703	Lambton Ward	47	Wellington City	09	Wellington Region	2.65902e+06	5.99082e+06	1	2121200	7	1009	50	2
1597500	36	552100	Fitzroy	3301	New Plymouth City Ward	33	New Plymouth District	07	Taranaki Region	2.60513e+06	6.23855e+06	1	1597500	4	941	13	2
1597700	66	552100	Fitzroy	3301	New Plymouth City Ward	33	New Plymouth District	07	Taranaki Region	2.6047e+06	6.2385e+06	1	1597700	5	958	23	2
1203900	3	536821	Omanu	2301	Mount Maunganui-Papamoa Ward	23	Tauranga City	04	Bay of Plenty Region	2.79189e+06	6.38809e+06	1	1203900	8	1035	1	3
1204000	12	536821	Omanu	2301	Mount Maunganui-Papamoa Ward	23	Tauranga City	04	Bay of Plenty Region	2.79253e+06	6.38825e+06	1	1204000	8	1035	5	3
681332	72	522722	Aberfeldy	806	Howick Ward	8	Manukau City	02	Auckland Region	2.68022e+06	6.475e+06	1	681332	5	967	25	2
418400	90	515500	Arch Hill	701	Western Bays Ward	7	Auckland City	02	Auckland Region	2.66625e+06	6.48026e+06	1	418400	5	966	31	2
417600	153	515500	Arch Hill	701	Western Bays Ward	7	Auckland City	02	Auckland Region	2.6667e+06	6.4808e+06	1	417600	5	967	54	2
1598101	126	552100	Fitzroy	3301	New Plymouth City Ward	33	New Plymouth District	07	Taranaki Region	2.605e+06	6.23836e+06	1	1598101	5	961	44	2
1597900	36	552100	Fitzroy	3301	New Plymouth City Ward	33	New Plymouth District	07	Taranaki Region	2.60514e+06	6.2384e+06	1	1597900	4	944	13	2
2645400	45	595400	Somerfield	6006	Spreydon-Heathcote Ward	60	Christchurch City	13	Canterbury Region	2.47999e+06	5.73893e+06	1	2645400	7	1029	16	2
2645800	159	595400	Somerfield	6006	Spreydon-Heathcote Ward	60	Christchurch City	13	Canterbury Region	2.48015e+06	5.73918e+06	1	2645800	2	912	52	1
417800	15	515500	Arch Hill	701	Western Bays Ward	7	Auckland City	02	Auckland Region	2.66645e+06	6.48065e+06	1	417800	6	979	5	2
681324	186	522722	Aberfeldy	806	Howick Ward	8	Manukau City	02	Auckland Region	2.68023e+06	6.47604e+06	1	681324	7	1029	65	2
2122400	63	572900	Thorndon-Tinakori Road	4703	Lambton Ward	47	Wellington City	09	Wellington Region	2.65862e+06	5.99066e+06	1	2122400	4	947	22	2
1597200	135	552100	Fitzroy	3301	New Plymouth City Ward	33	New Plymouth District	07	Taranaki Region	2.60505e+06	6.23888e+06	1	1597200	5	970	47	2
1204300	54	536821	Omanu	2301	Mount Maunganui-Papamoa Ward	23	Tauranga City	04	Bay of Plenty Region	2.79218e+06	6.38771e+06	1	1204300	8	1035	24	3
2645500	165	595400	Somerfield	6006	Spreydon-Heathcote Ward	60	Christchurch City	13	Canterbury Region	2.47954e+06	5.73862e+06	1	2645500	5	972	58	2
2645900	186	595400	Somerfield	6006	Spreydon-Heathcote Ward	60	Christchurch City	13	Canterbury Region	2.48022e+06	5.73908e+06	1	2645900	5	964	65	2
680601	204	522712	Murvale	806	Howick Ward	8	Manukau City	02	Auckland Region	2.68145e+06	6.47761e+06	1	680601	3	928	67	1
418000	57	515500	Arch Hill	701	Western Bays Ward	7	Auckland City	02	Auckland Region	2.66643e+06	6.48052e+06	1	418000	6	979	20	2
2121700	81	572900	Thorndon-Tinakori Road	4703	Lambton Ward	47	Wellington City	09	Wellington Region	2.65832e+06	5.99056e+06	1	2121700	4	943	28	2
2121100	30	572900	Thorndon-Tinakori Road	4703	Lambton Ward	47	Wellington City	09	Wellington Region	2.65885e+06	5.99086e+06	1	2121100	7	1009	10	2
1597800	57	552100	Fitzroy	3301	New Plymouth City Ward	33	New Plymouth District	07	Taranaki Region	2.60479e+06	6.23853e+06	1	1597800	5	958	20	2
1597400	123	552100	Fitzroy	3301	New Plymouth City Ward	33	New Plymouth District	07	Taranaki Region	2.60496e+06	6.23864e+06	1	1597400	4	941	43	2
1597600	30	552100	Fitzroy	3301	New Plymouth City Ward	33	New Plymouth District	07	Taranaki Region	2.60525e+06	6.23858e+06	1	1597600	4	941	10	2
2645700	144	595400	Somerfield	6006	Spreydon-Heathcote Ward	60	Christchurch City	13	Canterbury Region	2.48006e+06	5.73926e+06	1	2645700	7	1005	50	2
417500	30	515500	Arch Hill	701	Western Bays Ward	7	Auckland City	02	Auckland Region	2.66665e+06	6.4808e+06	1	417500	6	979	10	2
1466709	15	548833	Te Mata Hills	3009	Poukawa Ward	30	Hastings District	06	Hawke's Bay Region	2.84515e+06	6.16275e+06	1	1466709	1	884	5	1
418200	72	515500	Arch Hill	701	Western Bays Ward	7	Auckland City	02	Auckland Region	2.66605e+06	6.48026e+06	1	418200	3	922	24	1
2121800	48	572900	Thorndon-Tinakori Road	4703	Lambton Ward	47	Wellington City	09	Wellington Region	2.6583e+06	5.9905e+06	1	2121800	4	943	17	2
417900	15	515500	Arch Hill	701	Western Bays Ward	7	Auckland City	02	Auckland Region	2.66648e+06	6.48055e+06	1	417900	6	979	5	2
418300	96	515500	Arch Hill	701	Western Bays Ward	7	Auckland City	02	Auckland Region	2.66618e+06	6.48035e+06	1	418300	3	922	32	1
1204100	6	536821	Omanu	2301	Mount Maunganui-Papamoa Ward	23	Tauranga City	04	Bay of Plenty Region	2.79293e+06	6.3881e+06	1	1204100	8	1035	3	3
289100	192	512100	Green Bay	604	New Lynn Ward	6	Waitakere City	02	Auckland Region	2.66078e+06	6.47326e+06	1	289100	6	986	67	2
420100	78	515600	Eden Terrace	704	Hobson Ward	7	Auckland City	02	Auckland Region	2.66678e+06	6.48049e+06	1	420100	9	1092	35	3
2780800	117	599000	Maori Park	6404	Timaru Ward	64	Timaru District	13	Canterbury Region	2.36992e+06	5.64492e+06	1	2780800	5	973	41	2
2780900	69	599000	Maori Park	6404	Timaru Ward	64	Timaru District	13	Canterbury Region	2.37013e+06	5.64489e+06	1	2780900	8	1056	31	3
290600	192	512100	Green Bay	604	New Lynn Ward	6	Waitakere City	02	Auckland Region	2.65954e+06	6.47285e+06	1	290600	3	920	63	1
1469100	33	545761	Irongate	3003	Heretaunga Ward	30	Hastings District	06	Hawke's Bay Region	2.83833e+06	6.16527e+06	1	1469100	4	943	12	2
1469301	3	545761	Irongate	3005	Hastings Ward	30	Hastings District	06	Hawke's Bay Region	2.83854e+06	6.16575e+06	1	1469301	3	921	1	1
1601200	114	552200	Welbourn	3301	New Plymouth City Ward	33	New Plymouth District	07	Taranaki Region	2.60425e+06	6.23666e+06	1	1601200	8	1044	51	3
289901	66	512100	Green Bay	604	New Lynn Ward	6	Waitakere City	02	Auckland Region	2.65964e+06	6.47342e+06	1	289901	6	993	23	2
2125300	3	573000	Lambton	4703	Lambton Ward	47	Wellington City	09	Wellington Region	2.65883e+06	5.99008e+06	1	2125300	8	1047	1	3
420200	162	515600	Eden Terrace	704	Hobson Ward	7	Auckland City	02	Auckland Region	2.66696e+06	6.48051e+06	1	420200	3	932	53	1
2124700	3	573000	Lambton	4703	Lambton Ward	47	Wellington City	09	Wellington Region	2.65864e+06	5.99009e+06	1	2124700	5	970	1	2
2124900	261	573000	Lambton	4703	Lambton Ward	47	Wellington City	09	Wellington Region	2.65843e+06	5.98995e+06	1	2124900	10	1144	117	3
1600700	69	552200	Welbourn	3301	New Plymouth City Ward	33	New Plymouth District	07	Taranaki Region	2.60415e+06	6.23749e+06	1	1600700	9	1089	31	3
419900	126	515600	Eden Terrace	704	Hobson Ward	7	Auckland City	02	Auckland Region	2.66673e+06	6.48035e+06	1	419900	6	987	44	2
419701	171	515600	Eden Terrace	704	Hobson Ward	7	Auckland City	02	Auckland Region	2.66694e+06	6.48004e+06	1	419701	7	1019	60	2
2647600	144	591500	Cathedral Square	6005	Hagley-Ferrymead Ward	60	Christchurch City	13	Canterbury Region	2.47934e+06	5.74086e+06	1	2647600	6	994	50	2
2647700	93	591500	Cathedral Square	6005	Hagley-Ferrymead Ward	60	Christchurch City	13	Canterbury Region	2.47952e+06	5.74087e+06	1	2647700	6	994	33	2
290000	204	512100	Green Bay	604	New Lynn Ward	6	Waitakere City	02	Auckland Region	2.65977e+06	6.47357e+06	1	290000	4	945	71	2
290400	147	512100	Green Bay	604	New Lynn Ward	6	Waitakere City	02	Auckland Region	2.6597e+06	6.47306e+06	1	290400	4	938	51	2
420700	30	515600	Eden Terrace	704	Hobson Ward	7	Auckland City	02	Auckland Region	2.66707e+06	6.48035e+06	1	420700	7	1006	10	2
681326	123	522722	Aberfeldy	806	Howick Ward	8	Manukau City	02	Auckland Region	2.6803e+06	6.47587e+06	1	681326	6	993	43	2
681600	213	522723	Elsmore Park	803	Pakuranga Ward	8	Manukau City	02	Auckland Region	2.67908e+06	6.47566e+06	1	681600	7	1014	75	2
419600	129	515600	Eden Terrace	704	Hobson Ward	7	Auckland City	02	Auckland Region	2.66665e+06	6.48027e+06	1	419600	5	956	45	2
418600	81	515500	Arch Hill	701	Western Bays Ward	7	Auckland City	02	Auckland Region	2.66631e+06	6.48039e+06	1	418600	4	951	28	2
681334	120	522722	Aberfeldy	806	Howick Ward	8	Manukau City	02	Auckland Region	2.68026e+06	6.47467e+06	1	681334	3	919	40	1
2123200	78	572900	Thorndon-Tinakori Road	4703	Lambton Ward	47	Wellington City	09	Wellington Region	2.65826e+06	5.99064e+06	1	2123200	5	967	27	2
2123900	237	573000	Lambton	4703	Lambton Ward	47	Wellington City	09	Wellington Region	2.6586e+06	5.99031e+06	1	2123900	10	1246	107	3
681311	225	522722	Aberfeldy	806	Howick Ward	8	Manukau City	02	Auckland Region	2.68093e+06	6.47601e+06	1	681311	4	953	79	2
2122900	99	572900	Thorndon-Tinakori Road	4703	Lambton Ward	47	Wellington City	09	Wellington Region	2.65852e+06	5.99095e+06	1	2122900	4	941	35	2
1599400	78	552100	Fitzroy	3301	New Plymouth City Ward	33	New Plymouth District	07	Taranaki Region	2.60558e+06	6.23902e+06	1	1599400	7	1023	27	2
1599500	51	552100	Fitzroy	3301	New Plymouth City Ward	33	New Plymouth District	07	Taranaki Region	2.60537e+06	6.23896e+06	1	1599500	5	955	18	2
681317	261	522722	Aberfeldy	806	Howick Ward	8	Manukau City	02	Auckland Region	2.68041e+06	6.47555e+06	1	681317	5	962	91	2
419000	78	515500	Arch Hill	701	Western Bays Ward	7	Auckland City	02	Auckland Region	2.66586e+06	6.48019e+06	1	419000	3	918	26	1
681318	156	522722	Aberfeldy	806	Howick Ward	8	Manukau City	02	Auckland Region	2.6806e+06	6.47555e+06	1	681318	3	925	51	1
681337	201	522722	Aberfeldy	806	Howick Ward	8	Manukau City	02	Auckland Region	2.68034e+06	6.4751e+06	1	681337	6	981	70	2
420000	84	515600	Eden Terrace	704	Hobson Ward	7	Auckland City	02	Auckland Region	2.66667e+06	6.48043e+06	1	420000	9	1092	38	3
681303	207	522722	Aberfeldy	806	Howick Ward	8	Manukau City	02	Auckland Region	2.68078e+06	6.47581e+06	1	681303	5	967	72	2
681202	267	522721	Pigeon Mountain South	803	Pakuranga Ward	8	Manukau City	02	Auckland Region	2.6791e+06	6.47589e+06	1	681202	5	965	93	2
2123400	81	572900	Thorndon-Tinakori Road	4703	Lambton Ward	47	Wellington City	09	Wellington Region	2.65814e+06	5.99055e+06	1	2123400	4	949	28	2
681700	198	522723	Elsmore Park	803	Pakuranga Ward	8	Manukau City	02	Auckland Region	2.6792e+06	6.47556e+06	1	681700	3	930	65	1
1599700	15	552100	Fitzroy	3301	New Plymouth City Ward	33	New Plymouth District	07	Taranaki Region	2.60561e+06	6.23877e+06	1	1599700	5	955	5	2
550300	189	518202	Mt Eden East	703	Eden-Albert Ward	7	Auckland City	02	Auckland Region	2.66705e+06	6.47837e+06	1	550300	4	947	66	2
551000	153	518202	Mt Eden East	703	Eden-Albert Ward	7	Auckland City	02	Auckland Region	2.66725e+06	6.47808e+06	1	551000	5	971	54	2
551100	210	518202	Mt Eden East	703	Eden-Albert Ward	7	Auckland City	02	Auckland Region	2.66703e+06	6.47796e+06	1	551100	2	916	69	1
2648000	3	591500	Cathedral Square	6005	Hagley-Ferrymead Ward	60	Christchurch City	13	Canterbury Region	2.47978e+06	5.74086e+06	1	2648000	9	1108	1	3
681309	324	522722	Aberfeldy	806	Howick Ward	8	Manukau City	02	Auckland Region	2.68067e+06	6.4762e+06	1	681309	8	1032	146	3
681400	108	522723	Elsmore Park	803	Pakuranga Ward	8	Manukau City	02	Auckland Region	2.67938e+06	6.47555e+06	1	681400	3	927	36	1
288600	90	512100	Green Bay	604	New Lynn Ward	6	Waitakere City	02	Auckland Region	2.66018e+06	6.47365e+06	1	288600	3	934	30	1
549802	81	518202	Mt Eden East	703	Eden-Albert Ward	7	Auckland City	02	Auckland Region	2.66733e+06	6.47849e+06	1	549802	2	916	27	1
681323	54	522722	Aberfeldy	806	Howick Ward	8	Manukau City	02	Auckland Region	2.68049e+06	6.47482e+06	1	681323	3	930	18	1
419200	78	515500	Arch Hill	701	Western Bays Ward	7	Auckland City	02	Auckland Region	2.66594e+06	6.48021e+06	1	419200	5	954	27	2
681319	255	522722	Aberfeldy	806	Howick Ward	8	Manukau City	02	Auckland Region	2.68036e+06	6.47575e+06	1	681319	5	963	89	2
681331	57	522722	Aberfeldy	806	Howick Ward	8	Manukau City	02	Auckland Region	2.68016e+06	6.47494e+06	1	681331	3	930	19	1
2517200	144	589000	Wairarapa	6002	Fendalton-Waimairi Ward	60	Christchurch City	13	Canterbury Region	2.47599e+06	5.74478e+06	1	2517200	9	1123	65	3
1598501	87	552100	Fitzroy	3301	New Plymouth City Ward	33	New Plymouth District	07	Taranaki Region	2.60543e+06	6.23836e+06	1	1598501	4	944	30	2
681312	135	522722	Aberfeldy	806	Howick Ward	8	Manukau City	02	Auckland Region	2.68108e+06	6.47592e+06	1	681312	3	927	45	1
288800	105	512100	Green Bay	604	New Lynn Ward	6	Waitakere City	02	Auckland Region	2.66014e+06	6.47313e+06	1	288800	5	963	37	2
550600	120	518202	Mt Eden East	703	Eden-Albert Ward	7	Auckland City	02	Auckland Region	2.66712e+06	6.47821e+06	1	550600	5	955	42	2
550500	129	518202	Mt Eden East	703	Eden-Albert Ward	7	Auckland City	02	Auckland Region	2.66753e+06	6.47823e+06	1	550500	1	893	43	1
288402	66	512100	Green Bay	604	New Lynn Ward	6	Waitakere City	02	Auckland Region	2.66004e+06	6.4735e+06	1	288402	6	978	23	2
550100	165	518202	Mt Eden East	703	Eden-Albert Ward	7	Auckland City	02	Auckland Region	2.66727e+06	6.47841e+06	1	550100	5	964	58	2
2123700	66	573000	Lambton	4703	Lambton Ward	47	Wellington City	09	Wellington Region	2.65874e+06	5.99042e+06	1	2123700	5	970	23	2
2123600	69	572900	Thorndon-Tinakori Road	4703	Lambton Ward	47	Wellington City	09	Wellington Region	2.65803e+06	5.99045e+06	1	2123600	4	949	24	2
1598300	93	552100	Fitzroy	3301	New Plymouth City Ward	33	New Plymouth District	07	Taranaki Region	2.60534e+06	6.23832e+06	1	1598300	6	984	33	2
418900	69	515500	Arch Hill	701	Western Bays Ward	7	Auckland City	02	Auckland Region	2.66582e+06	6.48015e+06	1	418900	9	1080	31	3
681321	120	522722	Aberfeldy	806	Howick Ward	8	Manukau City	02	Auckland Region	2.68012e+06	6.47559e+06	1	681321	5	965	42	2
681900	186	522723	Elsmore Park	803	Pakuranga Ward	8	Manukau City	02	Auckland Region	2.67907e+06	6.47542e+06	1	681900	7	1013	65	2
2515900	72	589100	Jellie Park	6002	Fendalton-Waimairi Ward	60	Christchurch City	13	Canterbury Region	2.47663e+06	5.74475e+06	1	2515900	10	1145	32	3
2515800	219	589100	Jellie Park	6002	Fendalton-Waimairi Ward	60	Christchurch City	13	Canterbury Region	2.47656e+06	5.74467e+06	1	2515800	10	1193	99	3
549801	54	518202	Mt Eden East	703	Eden-Albert Ward	7	Auckland City	02	Auckland Region	2.66719e+06	6.47862e+06	1	549801	2	916	18	1
550900	126	518202	Mt Eden East	703	Eden-Albert Ward	7	Auckland City	02	Auckland Region	2.66703e+06	6.47815e+06	1	550900	2	917	42	1
681325	147	522722	Aberfeldy	806	Howick Ward	8	Manukau City	02	Auckland Region	2.6804e+06	6.47606e+06	1	681325	7	1024	51	2
681335	108	522722	Aberfeldy	806	Howick Ward	8	Manukau City	02	Auckland Region	2.68014e+06	6.47519e+06	1	681335	4	940	38	2
681333	75	522722	Aberfeldy	806	Howick Ward	8	Manukau City	02	Auckland Region	2.68031e+06	6.47498e+06	1	681333	5	967	26	2
2516200	204	589100	Jellie Park	6002	Fendalton-Waimairi Ward	60	Christchurch City	13	Canterbury Region	2.4764e+06	5.74484e+06	1	2516200	10	1157	92	3
2517100	162	589000	Wairarapa	6002	Fendalton-Waimairi Ward	60	Christchurch City	13	Canterbury Region	2.47635e+06	5.74503e+06	1	2517100	5	967	57	2
2516800	147	589000	Wairarapa	6002	Fendalton-Waimairi Ward	60	Christchurch City	13	Canterbury Region	2.47607e+06	5.74513e+06	1	2516800	2	907	49	1
2123000	105	572900	Thorndon-Tinakori Road	4703	Lambton Ward	47	Wellington City	09	Wellington Region	2.65847e+06	5.99089e+06	1	2123000	3	926	35	1
1599600	171	552100	Fitzroy	3301	New Plymouth City Ward	33	New Plymouth District	07	Taranaki Region	2.60541e+06	6.2388e+06	1	1599600	10	1216	77	3
419800	60	515600	Eden Terrace	704	Hobson Ward	7	Auckland City	02	Auckland Region	2.66687e+06	6.48018e+06	1	419800	6	987	21	2
681330	225	522722	Aberfeldy	806	Howick Ward	8	Manukau City	02	Auckland Region	2.68058e+06	6.47575e+06	1	681330	5	962	79	2
681336	45	522722	Aberfeldy	806	Howick Ward	8	Manukau City	02	Auckland Region	2.68021e+06	6.47525e+06	1	681336	4	940	16	2
418700	114	515500	Arch Hill	701	Western Bays Ward	7	Auckland City	02	Auckland Region	2.66638e+06	6.48046e+06	1	418700	4	951	40	2
418800	87	515500	Arch Hill	701	Western Bays Ward	7	Auckland City	02	Auckland Region	2.66564e+06	6.48018e+06	1	418800	9	1080	39	3
550700	105	518202	Mt Eden East	703	Eden-Albert Ward	7	Auckland City	02	Auckland Region	2.66749e+06	6.4781e+06	1	550700	1	881	35	1
288500	75	512100	Green Bay	604	New Lynn Ward	6	Waitakere City	02	Auckland Region	2.66013e+06	6.47357e+06	1	288500	6	978	26	2
681327	231	522722	Aberfeldy	806	Howick Ward	8	Manukau City	02	Auckland Region	2.68048e+06	6.47522e+06	1	681327	4	936	81	2
288900	132	512100	Green Bay	604	New Lynn Ward	6	Waitakere City	02	Auckland Region	2.6604e+06	6.47323e+06	1	288900	4	953	46	2
1468500	120	545762	Longlands South	3003	Heretaunga Ward	30	Hastings District	06	Hawke's Bay Region	2.84073e+06	6.16483e+06	1	1468500	4	939	42	2
2516000	135	589100	Jellie Park	6002	Fendalton-Waimairi Ward	60	Christchurch City	13	Canterbury Region	2.47638e+06	5.74457e+06	1	2516000	10	1145	61	3
2517000	99	589000	Wairarapa	6002	Fendalton-Waimairi Ward	60	Christchurch City	13	Canterbury Region	2.47628e+06	5.74509e+06	1	2517000	3	929	33	1
2123300	87	572900	Thorndon-Tinakori Road	4703	Lambton Ward	47	Wellington City	09	Wellington Region	2.6582e+06	5.99057e+06	1	2123300	5	967	30	2
419500	147	515600	Eden Terrace	703	Eden-Albert Ward	7	Auckland City	02	Auckland Region	2.6666e+06	6.48021e+06	1	419500	7	1007	51	2
1598401	30	552100	Fitzroy	3301	New Plymouth City Ward	33	New Plymouth District	07	Taranaki Region	2.6055e+06	6.23851e+06	1	1598401	4	944	10	2
550000	99	518202	Mt Eden East	703	Eden-Albert Ward	7	Auckland City	02	Auckland Region	2.66756e+06	6.47857e+06	1	550000	6	984	35	2
419100	18	515500	Arch Hill	701	Western Bays Ward	7	Auckland City	02	Auckland Region	2.66592e+06	6.48006e+06	1	419100	3	918	6	1
681310	147	522722	Aberfeldy	806	Howick Ward	8	Manukau City	02	Auckland Region	2.68093e+06	6.47618e+06	1	681310	8	1033	66	3
2648200	3	591500	Cathedral Square	6005	Hagley-Ferrymead Ward	60	Christchurch City	13	Canterbury Region	2.48004e+06	5.74132e+06	1	2648200	9	1108	1	3
288700	72	512100	Green Bay	604	New Lynn Ward	6	Waitakere City	02	Auckland Region	2.66011e+06	6.47334e+06	1	288700	3	934	24	1
2123500	99	572900	Thorndon-Tinakori Road	4703	Lambton Ward	47	Wellington City	09	Wellington Region	2.65809e+06	5.99046e+06	1	2123500	4	936	35	2
681500	243	522723	Elsmore Park	803	Pakuranga Ward	8	Manukau City	02	Auckland Region	2.67978e+06	6.47491e+06	1	681500	5	954	85	2
549900	81	518202	Mt Eden East	703	Eden-Albert Ward	7	Auckland City	02	Auckland Region	2.66738e+06	6.47858e+06	1	549900	4	937	28	2
550200	150	518202	Mt Eden East	703	Eden-Albert Ward	7	Auckland City	02	Auckland Region	2.66755e+06	6.47843e+06	1	550200	2	910	50	1
2126400	333	573000	Lambton	4703	Lambton Ward	47	Wellington City	09	Wellington Region	2.65856e+06	5.98981e+06	1	2126400	7	1012	117	2
1471800	111	545721	Karamu	3003	Heretaunga Ward	30	Hastings District	06	Hawke's Bay Region	2.84268e+06	6.16853e+06	1	1471800	7	1023	39	2
685500	69	522910	Pakuranga Central	803	Pakuranga Ward	8	Manukau City	02	Auckland Region	2.6782e+06	6.47519e+06	1	685500	4	952	24	2
290702	156	512100	Green Bay	604	New Lynn Ward	6	Waitakere City	02	Auckland Region	2.65925e+06	6.47289e+06	1	290702	3	928	51	1
2126700	147	573000	Lambton	4703	Lambton Ward	47	Wellington City	09	Wellington Region	2.65848e+06	5.98961e+06	1	2126700	6	978	51	2
2126500	162	573000	Lambton	4703	Lambton Ward	47	Wellington City	09	Wellington Region	2.65858e+06	5.98974e+06	1	2126500	9	1121	73	3
1601300	66	552200	Welbourn	3301	New Plymouth City Ward	33	New Plymouth District	07	Taranaki Region	2.60435e+06	6.23661e+06	1	1601300	9	1089	30	3
1601800	144	552200	Welbourn	3301	New Plymouth City Ward	33	New Plymouth District	07	Taranaki Region	2.60474e+06	6.23646e+06	1	1601800	7	1008	50	2
1601700	162	552200	Welbourn	3301	New Plymouth City Ward	33	New Plymouth District	07	Taranaki Region	2.60453e+06	6.23658e+06	1	1601700	7	1007	57	2
2124800	237	573000	Lambton	4703	Lambton Ward	47	Wellington City	09	Wellington Region	2.65858e+06	5.98998e+06	1	2124800	9	1126	107	3
2125600	33	573000	Lambton	4703	Lambton Ward	47	Wellington City	09	Wellington Region	2.65879e+06	5.99002e+06	1	2125600	8	1047	15	3
1601400	138	552200	Welbourn	3301	New Plymouth City Ward	33	New Plymouth District	07	Taranaki Region	2.6044e+06	6.2369e+06	1	1601400	2	918	46	1
1601000	93	552200	Welbourn	3301	New Plymouth City Ward	33	New Plymouth District	07	Taranaki Region	2.60431e+06	6.23697e+06	1	1601000	2	904	31	1
421100	9	515600	Eden Terrace	704	Hobson Ward	7	Auckland City	02	Auckland Region	2.66727e+06	6.48013e+06	1	421100	7	1029	3	2
421000	84	515600	Eden Terrace	704	Hobson Ward	7	Auckland City	02	Auckland Region	2.66718e+06	6.48019e+06	1	421000	7	1006	29	2
2517500	126	589000	Wairarapa	6002	Fendalton-Waimairi Ward	60	Christchurch City	13	Canterbury Region	2.47589e+06	5.74487e+06	1	2517500	9	1090	57	3
1600500	60	552100	Fitzroy	3301	New Plymouth City Ward	33	New Plymouth District	07	Taranaki Region	2.60584e+06	6.23896e+06	1	1600500	6	988	21	2
551402	18	518202	Mt Eden East	703	Eden-Albert Ward	7	Auckland City	02	Auckland Region	2.66753e+06	6.47783e+06	1	551402	4	945	6	2
551300	81	518202	Mt Eden East	703	Eden-Albert Ward	7	Auckland City	02	Auckland Region	2.66745e+06	6.47793e+06	1	551300	4	945	28	2
290200	171	512100	Green Bay	604	New Lynn Ward	6	Waitakere City	02	Auckland Region	2.65991e+06	6.47349e+06	1	290200	4	940	60	2
290500	135	512100	Green Bay	604	New Lynn Ward	6	Waitakere City	02	Auckland Region	2.65983e+06	6.47296e+06	1	290500	2	907	45	1
290300	60	512100	Green Bay	604	New Lynn Ward	6	Waitakere City	02	Auckland Region	2.65993e+06	6.47315e+06	1	290300	4	938	21	2
289902	39	512100	Green Bay	604	New Lynn Ward	6	Waitakere City	02	Auckland Region	2.65956e+06	6.47331e+06	1	289902	6	993	14	2
2125000	12	573000	Lambton	4703	Lambton Ward	47	Wellington City	09	Wellington Region	2.65889e+06	5.99023e+06	1	2125000	8	1047	5	3
2124500	123	573000	Lambton	4703	Lambton Ward	47	Wellington City	09	Wellington Region	2.65844e+06	5.99019e+06	1	2124500	5	970	43	2
1601100	3	552200	Welbourn	3301	New Plymouth City Ward	33	New Plymouth District	07	Taranaki Region	2.60394e+06	6.23721e+06	1	1601100	9	1089	1	3
2517300	141	589000	Wairarapa	6002	Fendalton-Waimairi Ward	60	Christchurch City	13	Canterbury Region	2.47614e+06	5.74477e+06	1	2517300	4	941	49	2
441504	3	514301	Grafton West	704	Hobson Ward	7	Auckland City	02	Auckland Region	2.66759e+06	6.48052e+06	1	441504	8	1066	1	3
551500	162	518202	Mt Eden East	703	Eden-Albert Ward	7	Auckland City	02	Auckland Region	2.66706e+06	6.47782e+06	1	551500	3	922	53	1
420900	36	515600	Eden Terrace	704	Hobson Ward	7	Auckland City	02	Auckland Region	2.66695e+06	6.48026e+06	1	420900	7	1006	13	2
289800	147	512100	Green Bay	604	New Lynn Ward	6	Waitakere City	02	Auckland Region	2.65947e+06	6.47326e+06	1	289800	6	998	51	2
420600	33	515600	Eden Terrace	704	Hobson Ward	7	Auckland City	02	Auckland Region	2.66735e+06	6.48042e+06	1	420600	7	1029	12	2
1600800	33	552200	Welbourn	3301	New Plymouth City Ward	33	New Plymouth District	07	Taranaki Region	2.60417e+06	6.2374e+06	1	1600800	9	1089	15	3
551700	192	518202	Mt Eden East	703	Eden-Albert Ward	7	Auckland City	02	Auckland Region	2.66742e+06	6.47767e+06	1	551700	3	931	63	1
289700	93	512100	Green Bay	604	New Lynn Ward	6	Waitakere City	02	Auckland Region	2.65943e+06	6.47346e+06	1	289700	2	908	31	1
420300	39	515600	Eden Terrace	704	Hobson Ward	7	Auckland City	02	Auckland Region	2.66704e+06	6.48055e+06	1	420300	7	1030	14	2
682302	33	522723	Elsmore Park	803	Pakuranga Ward	8	Manukau City	02	Auckland Region	2.67941e+06	6.47519e+06	1	682302	5	967	12	2
421200	78	515600	Eden Terrace	704	Hobson Ward	7	Auckland City	02	Auckland Region	2.66737e+06	6.48022e+06	1	421200	7	1029	27	2
1469302	57	547900	Raureka	3005	Hastings Ward	30	Hastings District	06	Hawke's Bay Region	2.83867e+06	6.16563e+06	1	1469302	3	921	19	1
2124400	9	573000	Lambton	4703	Lambton Ward	47	Wellington City	09	Wellington Region	2.65868e+06	5.99001e+06	1	2124400	5	970	3	2
289000	150	512100	Green Bay	604	New Lynn Ward	6	Waitakere City	02	Auckland Region	2.66059e+06	6.47324e+06	1	289000	8	1036	68	3
551401	69	518202	Mt Eden East	703	Eden-Albert Ward	7	Auckland City	02	Auckland Region	2.66744e+06	6.4778e+06	1	551401	4	945	24	2
682301	201	522723	Elsmore Park	803	Pakuranga Ward	8	Manukau City	02	Auckland Region	2.67942e+06	6.4753e+06	1	682301	5	967	70	2
420800	390	515600	Eden Terrace	704	Hobson Ward	7	Auckland City	02	Auckland Region	2.66699e+06	6.48035e+06	1	420800	6	986	136	2
1469400	183	548300	Akina	3005	Hastings Ward	30	Hastings District	06	Hawke's Bay Region	2.83887e+06	6.16533e+06	1	1469400	6	977	64	2
2125500	21	573000	Lambton	4703	Lambton Ward	47	Wellington City	09	Wellington Region	2.65887e+06	5.98998e+06	1	2125500	8	1047	9	3
2124300	129	573000	Lambton	4703	Lambton Ward	47	Wellington City	09	Wellington Region	2.65899e+06	5.99e+06	1	2124300	4	943	45	2
1599800	60	552100	Fitzroy	3301	New Plymouth City Ward	33	New Plymouth District	07	Taranaki Region	2.60561e+06	6.23892e+06	1	1599800	7	1023	21	2
682200	126	522723	Elsmore Park	803	Pakuranga Ward	8	Manukau City	02	Auckland Region	2.67929e+06	6.4753e+06	1	682200	4	952	44	2
2124000	6	573000	Lambton	4703	Lambton Ward	47	Wellington City	09	Wellington Region	2.65871e+06	5.99022e+06	1	2124000	5	970	2	2
420500	207	515600	Eden Terrace	704	Hobson Ward	7	Auckland City	02	Auckland Region	2.66725e+06	6.48038e+06	1	420500	4	944	72	2
551600	198	518202	Mt Eden East	703	Eden-Albert Ward	7	Auckland City	02	Auckland Region	2.66701e+06	6.47772e+06	1	551600	7	1020	69	2
290100	117	512100	Green Bay	604	New Lynn Ward	6	Waitakere City	02	Auckland Region	2.65982e+06	6.47322e+06	1	290100	8	1033	53	3
420400	96	515600	Eden Terrace	704	Hobson Ward	7	Auckland City	02	Auckland Region	2.66712e+06	6.48049e+06	1	420400	7	1030	34	2
289500	96	512100	Green Bay	604	New Lynn Ward	6	Waitakere City	02	Auckland Region	2.65929e+06	6.47347e+06	1	289500	2	908	32	1
70204	330	503400	Maunu	205	Okara Ward	2	Whangarei District	01	Northland Region	2.62631e+06	6.60597e+06	1	70204	1	892	109	1
551200	123	518202	Mt Eden East	703	Eden-Albert Ward	7	Auckland City	02	Auckland Region	2.66725e+06	6.4779e+06	1	551200	5	971	43	2
1600900	177	552200	Welbourn	3301	New Plymouth City Ward	33	New Plymouth District	07	Taranaki Region	2.60433e+06	6.23727e+06	1	1600900	5	959	62	2
1600600	33	552200	Welbourn	3301	New Plymouth City Ward	33	New Plymouth District	07	Taranaki Region	2.60406e+06	6.23761e+06	1	1600600	9	1089	15	3
294102	96	511901	Kaurilands	604	New Lynn Ward	6	Waitakere City	02	Auckland Region	2.65819e+06	6.4731e+06	1	294102	1	898	32	1
2128500	15	573000	Lambton	4703	Lambton Ward	47	Wellington City	09	Wellington Region	2.65857e+06	5.98926e+06	1	2128500	8	1068	7	3
818500	42	525910	Pukekohe North	1003	Pukekohe Ward	10	Franklin District	02	Auckland Region	2.67921e+06	6.44302e+06	1	818500	10	1150	19	3
818000	141	525910	Pukekohe North	1003	Pukekohe Ward	10	Franklin District	02	Auckland Region	2.67904e+06	6.44422e+06	1	818000	6	989	49	2
817500	153	525910	Pukekohe North	1003	Pukekohe Ward	10	Franklin District	02	Auckland Region	2.67889e+06	6.4441e+06	1	817500	8	1050	69	3
2521500	141	588700	Bishopdale	6002	Fendalton-Waimairi Ward	60	Christchurch City	13	Canterbury Region	2.47665e+06	5.74567e+06	1	2521500	3	931	47	1
293100	162	511902	Crum Park	604	New Lynn Ward	6	Waitakere City	02	Auckland Region	2.65879e+06	6.47313e+06	1	293100	3	920	53	1
2128600	42	573000	Lambton	4703	Lambton Ward	47	Wellington City	09	Wellington Region	2.65844e+06	5.98924e+06	1	2128600	8	1068	19	3
2127700	57	573000	Lambton	4703	Lambton Ward	47	Wellington City	09	Wellington Region	2.65864e+06	5.98951e+06	1	2127700	9	1073	26	3
1472300	78	545721	Karamu	3003	Heretaunga Ward	30	Hastings District	06	Hawke's Bay Region	2.84222e+06	6.16778e+06	1	1472300	8	1041	35	3
817800	285	525910	Pukekohe North	1003	Pukekohe Ward	10	Franklin District	02	Auckland Region	2.6791e+06	6.44394e+06	1	817800	8	1040	128	3
291700	102	511902	Crum Park	604	New Lynn Ward	6	Waitakere City	02	Auckland Region	2.65899e+06	6.47327e+06	1	291700	4	942	36	2
685600	108	522910	Pakuranga Central	803	Pakuranga Ward	8	Manukau City	02	Auckland Region	2.67817e+06	6.475e+06	1	685600	4	951	38	2
2127200	90	573000	Lambton	4703	Lambton Ward	47	Wellington City	09	Wellington Region	2.65856e+06	5.98964e+06	1	2127200	6	993	31	2
2127000	39	573000	Lambton	4703	Lambton Ward	47	Wellington City	09	Wellington Region	2.65866e+06	5.98966e+06	1	2127000	8	1047	18	3
1602100	96	552200	Welbourn	3301	New Plymouth City Ward	33	New Plymouth District	07	Taranaki Region	2.6044e+06	6.23631e+06	1	1602100	7	1007	34	2
1471700	66	545721	Karamu	3003	Heretaunga Ward	30	Hastings District	06	Hawke's Bay Region	2.84215e+06	6.16813e+06	1	1471700	7	1023	23	2
2127300	6	573000	Lambton	4703	Lambton Ward	47	Wellington City	09	Wellington Region	2.65868e+06	5.98957e+06	1	2127300	8	1047	3	3
1602000	81	552200	Welbourn	3301	New Plymouth City Ward	33	New Plymouth District	07	Taranaki Region	2.60445e+06	6.23612e+06	1	1602000	5	973	28	2
2126100	21	573000	Lambton	4703	Lambton Ward	47	Wellington City	09	Wellington Region	2.65848e+06	5.98991e+06	1	2126100	9	1121	9	3
2126200	9	573000	Lambton	4703	Lambton Ward	47	Wellington City	09	Wellington Region	2.65865e+06	5.98984e+06	1	2126200	8	1047	4	3
2125900	3	573000	Lambton	4703	Lambton Ward	47	Wellington City	09	Wellington Region	2.65886e+06	5.98974e+06	1	2125900	8	1047	1	3
2127400	3	573000	Lambton	4703	Lambton Ward	47	Wellington City	09	Wellington Region	2.65874e+06	5.9895e+06	1	2127400	8	1047	1	3
816501	312	525910	Pukekohe North	1003	Pukekohe Ward	10	Franklin District	02	Auckland Region	2.67975e+06	6.44428e+06	1	816501	3	929	103	1
2117800	39	572900	Thorndon-Tinakori Road	4703	Lambton Ward	47	Wellington City	09	Wellington Region	2.65912e+06	5.99148e+06	1	2117800	4	938	14	2
2190300	120	576002	Island Bay East	4705	Southern Ward	47	Wellington City	09	Wellington Region	2.6585e+06	5.98453e+06	1	2190300	4	944	42	2
291000	174	512100	Green Bay	604	New Lynn Ward	6	Waitakere City	02	Auckland Region	2.66037e+06	6.47304e+06	1	291000	4	948	61	2
2126600	54	573000	Lambton	4703	Lambton Ward	47	Wellington City	09	Wellington Region	2.65867e+06	5.98973e+06	1	2126600	8	1047	24	3
2126800	24	573000	Lambton	4703	Lambton Ward	47	Wellington City	09	Wellington Region	2.65839e+06	5.98978e+06	1	2126800	9	1121	11	3
685400	105	522910	Pakuranga Central	803	Pakuranga Ward	8	Manukau City	02	Auckland Region	2.67798e+06	6.47507e+06	1	685400	4	952	37	2
1601500	54	552200	Welbourn	3301	New Plymouth City Ward	33	New Plymouth District	07	Taranaki Region	2.60457e+06	6.23679e+06	1	1601500	4	945	19	2
291600	129	511902	Crum Park	604	New Lynn Ward	6	Waitakere City	02	Auckland Region	2.65888e+06	6.47332e+06	1	291600	7	1014	45	2
2126900	108	573000	Lambton	4703	Lambton Ward	47	Wellington City	09	Wellington Region	2.65837e+06	5.98942e+06	1	2126900	7	1004	38	2
2125700	3	573000	Lambton	4703	Lambton Ward	47	Wellington City	09	Wellington Region	2.65875e+06	5.98991e+06	1	2125700	8	1047	1	3
290701	78	512100	Green Bay	604	New Lynn Ward	6	Waitakere City	02	Auckland Region	2.65916e+06	6.473e+06	1	290701	3	932	26	1
1472000	66	545721	Karamu	3003	Heretaunga Ward	30	Hastings District	06	Hawke's Bay Region	2.84247e+06	6.16819e+06	1	1472000	5	971	23	2
1601900	129	552200	Welbourn	3301	New Plymouth City Ward	33	New Plymouth District	07	Taranaki Region	2.60482e+06	6.236e+06	1	1601900	4	940	45	2
2125800	27	573000	Lambton	4703	Lambton Ward	47	Wellington City	09	Wellington Region	2.6588e+06	5.98984e+06	1	2125800	8	1047	12	3
290703	153	512100	Green Bay	604	New Lynn Ward	6	Waitakere City	02	Auckland Region	2.65938e+06	6.4729e+06	1	290703	3	932	50	1
291800	81	511902	Crum Park	604	New Lynn Ward	6	Waitakere City	02	Auckland Region	2.65902e+06	6.47317e+06	1	291800	4	942	28	2
556600	114	518301	Maungawhau	703	Eden-Albert Ward	7	Auckland City	02	Auckland Region	2.66713e+06	6.47752e+06	1	556600	4	936	40	2
820300	135	525910	Pukekohe North	1003	Pukekohe Ward	10	Franklin District	02	Auckland Region	2.6788e+06	6.44304e+06	1	820300	10	1253	61	3
2129900	36	573000	Lambton	4703	Lambton Ward	47	Wellington City	09	Wellington Region	2.65822e+06	5.98885e+06	1	2129900	6	998	13	2
2129400	69	573000	Lambton	4703	Lambton Ward	47	Wellington City	09	Wellington Region	2.65831e+06	5.98902e+06	1	2129400	5	969	24	2
2521600	99	588700	Bishopdale	6002	Fendalton-Waimairi Ward	60	Christchurch City	13	Canterbury Region	2.47678e+06	5.74572e+06	1	2521600	4	947	35	2
1472900	39	545721	Karamu	3003	Heretaunga Ward	30	Hastings District	06	Hawke's Bay Region	2.84126e+06	6.16495e+06	1	1472900	4	940	14	2
2128100	6	573000	Lambton	4703	Lambton Ward	47	Wellington City	09	Wellington Region	2.65862e+06	5.98944e+06	1	2128100	8	1040	3	3
818400	138	525910	Pukekohe North	1003	Pukekohe Ward	10	Franklin District	02	Auckland Region	2.67924e+06	6.44328e+06	1	818400	9	1130	62	3
2521700	81	588700	Bishopdale	6002	Fendalton-Waimairi Ward	60	Christchurch City	13	Canterbury Region	2.47651e+06	5.74564e+06	1	2521700	3	923	27	1
2521300	90	588700	Bishopdale	6002	Fendalton-Waimairi Ward	60	Christchurch City	13	Canterbury Region	2.47663e+06	5.74585e+06	1	2521300	5	955	31	2
2129300	57	573000	Lambton	4703	Lambton Ward	47	Wellington City	09	Wellington Region	2.65824e+06	5.98905e+06	1	2129300	5	969	20	2
2128400	147	573000	Lambton	4703	Lambton Ward	47	Wellington City	09	Wellington Region	2.65859e+06	5.98932e+06	1	2128400	8	1068	66	3
2129200	66	573000	Lambton	4703	Lambton Ward	47	Wellington City	09	Wellington Region	2.65836e+06	5.9893e+06	1	2129200	7	1004	23	2
818600	27	525910	Pukekohe North	1003	Pukekohe Ward	10	Franklin District	02	Auckland Region	2.67938e+06	6.4431e+06	1	818600	2	915	9	1
817300	84	525910	Pukekohe North	1003	Pukekohe Ward	10	Franklin District	02	Auckland Region	2.67977e+06	6.44299e+06	1	817300	7	1019	29	2
2127600	105	573000	Lambton	4703	Lambton Ward	47	Wellington City	09	Wellington Region	2.65853e+06	5.98955e+06	1	2127600	9	1073	47	3
2522200	96	588700	Bishopdale	6002	Fendalton-Waimairi Ward	60	Christchurch City	13	Canterbury Region	2.47667e+06	5.74618e+06	1	2522200	5	954	34	2
2522300	147	588700	Bishopdale	6002	Fendalton-Waimairi Ward	60	Christchurch City	13	Canterbury Region	2.47683e+06	5.74617e+06	1	2522300	5	956	51	2
293002	117	511902	Crum Park	604	New Lynn Ward	6	Waitakere City	02	Auckland Region	2.6584e+06	6.47316e+06	1	293002	2	907	39	1
817200	240	525922	Bledisloe Park	1003	Pukekohe Ward	10	Franklin District	02	Auckland Region	2.67995e+06	6.44281e+06	1	817200	4	952	84	2
294101	81	511901	Kaurilands	604	New Lynn Ward	6	Waitakere City	02	Auckland Region	2.65802e+06	6.47307e+06	1	294101	1	898	27	1
2522500	126	588700	Bishopdale	6002	Fendalton-Waimairi Ward	60	Christchurch City	13	Canterbury Region	2.47695e+06	5.74603e+06	1	2522500	4	949	44	2
2128800	162	573000	Lambton	4703	Lambton Ward	47	Wellington City	09	Wellington Region	2.65834e+06	5.98923e+06	1	2128800	8	1068	73	3
2128000	105	573000	Lambton	4703	Lambton Ward	47	Wellington City	09	Wellington Region	2.65851e+06	5.9895e+06	1	2128000	8	1040	47	3
2129000	141	573000	Lambton	4703	Lambton Ward	47	Wellington City	09	Wellington Region	2.65848e+06	5.9892e+06	1	2129000	10	1500	63	3
2129100	6	573000	Lambton	4703	Lambton Ward	47	Wellington City	09	Wellington Region	2.65854e+06	5.9892e+06	1	2129100	7	1004	2	2
2127900	93	573000	Lambton	4703	Lambton Ward	47	Wellington City	09	Wellington Region	2.65849e+06	5.98944e+06	1	2127900	8	1040	42	3
817902	108	525910	Pukekohe North	1003	Pukekohe Ward	10	Franklin District	02	Auckland Region	2.67893e+06	6.44361e+06	1	817902	6	989	38	2
818100	198	525910	Pukekohe North	1003	Pukekohe Ward	10	Franklin District	02	Auckland Region	2.67928e+06	6.4436e+06	1	818100	5	961	69	2
818200	213	525910	Pukekohe North	1003	Pukekohe Ward	10	Franklin District	02	Auckland Region	2.67942e+06	6.44352e+06	1	818200	7	1022	75	2
2522000	141	588700	Bishopdale	6002	Fendalton-Waimairi Ward	60	Christchurch City	13	Canterbury Region	2.47629e+06	5.74548e+06	1	2522000	5	964	49	2
2522400	90	588700	Bishopdale	6002	Fendalton-Waimairi Ward	60	Christchurch City	13	Canterbury Region	2.47677e+06	5.74599e+06	1	2522400	4	942	31	2
292900	63	511902	Crum Park	604	New Lynn Ward	6	Waitakere City	02	Auckland Region	2.65879e+06	6.47335e+06	1	292900	2	900	21	1
2128700	111	573000	Lambton	4703	Lambton Ward	47	Wellington City	09	Wellington Region	2.65841e+06	5.98918e+06	1	2128700	8	1068	50	3
2128200	153	573000	Lambton	4703	Lambton Ward	47	Wellington City	09	Wellington Region	2.65843e+06	5.98934e+06	1	2128200	5	967	54	2
818300	72	525910	Pukekohe North	1003	Pukekohe Ward	10	Franklin District	02	Auckland Region	2.67907e+06	6.44337e+06	1	818300	10	1150	32	3
2522100	126	588700	Bishopdale	6002	Fendalton-Waimairi Ward	60	Christchurch City	13	Canterbury Region	2.47651e+06	5.74537e+06	1	2522100	7	1022	44	2
2123100	99	572900	Thorndon-Tinakori Road	4703	Lambton Ward	47	Wellington City	09	Wellington Region	2.65839e+06	5.99078e+06	1	2123100	2	899	33	1
293302	45	512100	Green Bay	604	New Lynn Ward	6	Waitakere City	02	Auckland Region	2.65904e+06	6.4729e+06	1	293302	5	962	16	2
293301	135	511902	Crum Park	604	New Lynn Ward	6	Waitakere City	02	Auckland Region	2.65899e+06	6.47284e+06	1	293301	5	962	47	2
2128300	24	573000	Lambton	4703	Lambton Ward	47	Wellington City	09	Wellington Region	2.6585e+06	5.98933e+06	1	2128300	8	1068	11	3
2128900	120	573000	Lambton	4703	Lambton Ward	47	Wellington City	09	Wellington Region	2.65829e+06	5.98929e+06	1	2128900	7	1025	42	2
817600	120	525910	Pukekohe North	1003	Pukekohe Ward	10	Franklin District	02	Auckland Region	2.6792e+06	6.44437e+06	1	817600	5	967	42	2
293200	57	511902	Crum Park	604	New Lynn Ward	6	Waitakere City	02	Auckland Region	2.65844e+06	6.47302e+06	1	293200	3	934	19	1
2131600	270	573101	Willis Street-Cambridge Terrace	4703	Lambton Ward	47	Wellington City	09	Wellington Region	2.65849e+06	5.98891e+06	1	2131600	10	1255	122	3
2131500	201	573101	Willis Street-Cambridge Terrace	4703	Lambton Ward	47	Wellington City	09	Wellington Region	2.65867e+06	5.98895e+06	1	2131500	6	988	70	2
2131300	135	573101	Willis Street-Cambridge Terrace	4703	Lambton Ward	47	Wellington City	09	Wellington Region	2.65867e+06	5.98916e+06	1	2131300	8	1056	61	3
2131100	114	573101	Willis Street-Cambridge Terrace	4703	Lambton Ward	47	Wellington City	09	Wellington Region	2.65874e+06	5.98924e+06	1	2131100	10	1176	51	3
821500	135	525921	Pukekohe West	1003	Pukekohe Ward	10	Franklin District	02	Auckland Region	2.67885e+06	6.44288e+06	1	821500	10	1206	61	3
2525600	186	588500	Kaimahi	6002	Fendalton-Waimairi Ward	60	Christchurch City	13	Canterbury Region	2.47707e+06	5.74653e+06	1	2525600	6	984	65	2
2525500	198	588500	Kaimahi	6002	Fendalton-Waimairi Ward	60	Christchurch City	13	Canterbury Region	2.47694e+06	5.74647e+06	1	2525500	6	985	69	2
2525203	189	588500	Kaimahi	6002	Fendalton-Waimairi Ward	60	Christchurch City	13	Canterbury Region	2.47707e+06	5.74702e+06	1	2525203	8	1049	85	3
821700	129	525921	Pukekohe West	1003	Pukekohe Ward	10	Franklin District	02	Auckland Region	2.67875e+06	6.44258e+06	1	821700	7	1022	45	2
821001	192	525921	Pukekohe West	1003	Pukekohe Ward	10	Franklin District	02	Auckland Region	2.67831e+06	6.44255e+06	1	821001	9	1077	86	3
820703	186	525921	Pukekohe West	1003	Pukekohe Ward	10	Franklin District	02	Auckland Region	2.67808e+06	6.4426e+06	1	820703	6	981	65	2
820800	51	525921	Pukekohe West	1003	Pukekohe Ward	10	Franklin District	02	Auckland Region	2.67766e+06	6.44229e+06	1	820800	7	1009	18	2
2130300	108	573000	Lambton	4703	Lambton Ward	47	Wellington City	09	Wellington Region	2.65819e+06	5.98877e+06	1	2130300	7	1017	38	2
556500	162	518301	Maungawhau	703	Eden-Albert Ward	7	Auckland City	02	Auckland Region	2.66697e+06	6.47757e+06	1	556500	3	930	53	1
2130200	81	573000	Lambton	4703	Lambton Ward	47	Wellington City	09	Wellington Region	2.65829e+06	5.98872e+06	1	2130200	7	1018	28	2
2129500	96	573000	Lambton	4703	Lambton Ward	47	Wellington City	09	Wellington Region	2.65829e+06	5.98893e+06	1	2129500	5	967	34	2
2130400	201	573000	Lambton	4703	Lambton Ward	47	Wellington City	09	Wellington Region	2.65829e+06	5.98914e+06	1	2130400	10	1313	90	3
426000	45	515202	St Marys	701	Western Bays Ward	7	Auckland City	02	Auckland Region	2.66631e+06	6.48253e+06	1	426000	1	896	15	1
818700	39	525910	Pukekohe North	1003	Pukekohe Ward	10	Franklin District	02	Auckland Region	2.67947e+06	6.44305e+06	1	818700	2	915	13	1
818800	33	525910	Pukekohe North	1003	Pukekohe Ward	10	Franklin District	02	Auckland Region	2.67919e+06	6.44279e+06	1	818800	10	1206	15	3
819000	9	525910	Pukekohe North	1003	Pukekohe Ward	10	Franklin District	02	Auckland Region	2.67955e+06	6.44278e+06	1	819000	10	1206	4	3
557000	150	518301	Maungawhau	703	Eden-Albert Ward	7	Auckland City	02	Auckland Region	2.66733e+06	6.47749e+06	1	557000	4	943	52	2
557100	123	518301	Maungawhau	703	Eden-Albert Ward	7	Auckland City	02	Auckland Region	2.66727e+06	6.47734e+06	1	557100	4	950	43	2
2130100	72	573000	Lambton	4703	Lambton Ward	47	Wellington City	09	Wellington Region	2.65834e+06	5.98881e+06	1	2130100	7	1002	25	2
2130000	72	573000	Lambton	4703	Lambton Ward	47	Wellington City	09	Wellington Region	2.65828e+06	5.98883e+06	1	2130000	7	1002	25	2
2129800	54	573000	Lambton	4703	Lambton Ward	47	Wellington City	09	Wellington Region	2.65819e+06	5.98899e+06	1	2129800	6	998	19	2
556900	267	518301	Maungawhau	703	Eden-Albert Ward	7	Auckland City	02	Auckland Region	2.667e+06	6.47738e+06	1	556900	5	958	93	2
558000	288	518302	Mt Eden South	703	Eden-Albert Ward	7	Auckland City	02	Auckland Region	2.66691e+06	6.47709e+06	1	558000	3	928	95	1
557800	201	518301	Maungawhau	703	Eden-Albert Ward	7	Auckland City	02	Auckland Region	2.66693e+06	6.47724e+06	1	557800	2	910	66	1
557401	135	518302	Mt Eden South	703	Eden-Albert Ward	7	Auckland City	02	Auckland Region	2.66723e+06	6.47711e+06	1	557401	2	903	45	1
557300	102	518301	Maungawhau	703	Eden-Albert Ward	7	Auckland City	02	Auckland Region	2.66729e+06	6.47719e+06	1	557300	1	859	34	1
2129700	183	573000	Lambton	4703	Lambton Ward	47	Wellington City	09	Wellington Region	2.65843e+06	5.98894e+06	1	2129700	6	988	64	2
2130800	42	573101	Willis Street-Cambridge Terrace	4703	Lambton Ward	47	Wellington City	09	Wellington Region	2.65871e+06	5.98939e+06	1	2130800	6	977	15	2
2523400	231	588700	Bishopdale	6002	Fendalton-Waimairi Ward	60	Christchurch City	13	Canterbury Region	2.47689e+06	5.74632e+06	1	2523400	5	971	81	2
426100	342	515202	St Marys	701	Western Bays Ward	7	Auckland City	02	Auckland Region	2.66651e+06	6.48236e+06	1	426100	3	928	113	1
557200	108	518301	Maungawhau	703	Eden-Albert Ward	7	Auckland City	02	Auckland Region	2.66742e+06	6.47735e+06	1	557200	3	918	36	1
2130500	156	573000	Lambton	4703	Lambton Ward	47	Wellington City	09	Wellington Region	2.65833e+06	5.98912e+06	1	2130500	6	988	55	2
2130700	75	573000	Lambton	4703	Lambton Ward	47	Wellington City	09	Wellington Region	2.65849e+06	5.98911e+06	1	2130700	6	988	26	2
2131000	15	573101	Willis Street-Cambridge Terrace	4703	Lambton Ward	47	Wellington City	09	Wellington Region	2.65868e+06	5.98931e+06	1	2131000	10	1176	7	3
820200	150	525910	Pukekohe North	1003	Pukekohe Ward	10	Franklin District	02	Auckland Region	2.67883e+06	6.44324e+06	1	820200	10	1346	68	3
425900	63	515202	St Marys	701	Western Bays Ward	7	Auckland City	02	Auckland Region	2.66644e+06	6.48265e+06	1	425900	1	896	21	1
2658200	3	594700	Addington	6006	Spreydon-Heathcote Ward	60	Christchurch City	13	Canterbury Region	2.47951e+06	5.74073e+06	1	2658200	7	1024	1	2
2134000	3	573101	Willis Street-Cambridge Terrace	4703	Lambton Ward	47	Wellington City	09	Wellington Region	2.65867e+06	5.9886e+06	1	2134000	7	1028	1	2
2134300	18	573101	Willis Street-Cambridge Terrace	4703	Lambton Ward	47	Wellington City	09	Wellington Region	2.65863e+06	5.98867e+06	1	2134300	7	1028	6	2
2133800	15	573101	Willis Street-Cambridge Terrace	4703	Lambton Ward	47	Wellington City	09	Wellington Region	2.65887e+06	5.98863e+06	1	2133800	7	1003	5	2
823402	447	525922	Bledisloe Park	1003	Pukekohe Ward	10	Franklin District	02	Auckland Region	2.67926e+06	6.44127e+06	1	823402	2	907	148	1
822406	129	525921	Pukekohe West	1003	Pukekohe Ward	10	Franklin District	02	Auckland Region	2.67875e+06	6.44159e+06	1	822406	5	973	45	2
822407	132	525921	Pukekohe West	1003	Pukekohe Ward	10	Franklin District	02	Auckland Region	2.67889e+06	6.44149e+06	1	822407	7	1010	46	2
822402	414	525921	Pukekohe West	1003	Pukekohe Ward	10	Franklin District	02	Auckland Region	2.67855e+06	6.44132e+06	1	822402	1	894	137	1
823401	195	525922	Bledisloe Park	1003	Pukekohe Ward	10	Franklin District	02	Auckland Region	2.67918e+06	6.44151e+06	1	823401	4	944	68	2
822408	96	525921	Pukekohe West	1003	Pukekohe Ward	10	Franklin District	02	Auckland Region	2.67874e+06	6.44138e+06	1	822408	5	973	34	2
1478800	84	548500	Camberley	3005	Hastings Ward	30	Hastings District	06	Hawke's Bay Region	2.8385e+06	6.16792e+06	1	1478800	8	1058	38	3
560100	246	518500	Three Kings	702	Avondale-Roskill Ward	7	Auckland City	02	Auckland Region	2.66569e+06	6.47673e+06	1	560100	7	1019	86	2
561400	102	518500	Three Kings	702	Avondale-Roskill Ward	7	Auckland City	02	Auckland Region	2.66593e+06	6.47665e+06	1	561400	4	947	36	2
560800	141	518500	Three Kings	702	Avondale-Roskill Ward	7	Auckland City	02	Auckland Region	2.66579e+06	6.47619e+06	1	560800	8	1049	63	3
2527401	144	588500	Kaimahi	6002	Fendalton-Waimairi Ward	60	Christchurch City	13	Canterbury Region	2.4761e+06	5.74759e+06	1	2527401	1	894	48	1
2525800	99	588500	Kaimahi	6002	Fendalton-Waimairi Ward	60	Christchurch City	13	Canterbury Region	2.47671e+06	5.74709e+06	1	2525800	4	948	35	2
2133600	129	573101	Willis Street-Cambridge Terrace	4703	Lambton Ward	47	Wellington City	09	Wellington Region	2.65871e+06	5.98876e+06	1	2133600	6	995	45	2
691200	228	522810	Pakuranga North	803	Pakuranga Ward	8	Manukau City	02	Auckland Region	2.6787e+06	6.47568e+06	1	691200	5	964	80	2
2525210	159	588500	Kaimahi	6002	Fendalton-Waimairi Ward	60	Christchurch City	13	Canterbury Region	2.47727e+06	5.74701e+06	1	2525210	8	1044	72	3
2132500	12	573101	Willis Street-Cambridge Terrace	4703	Lambton Ward	47	Wellington City	09	Wellington Region	2.65846e+06	5.98855e+06	1	2132500	8	1061	5	3
2525205	198	588500	Kaimahi	6002	Fendalton-Waimairi Ward	60	Christchurch City	13	Canterbury Region	2.47715e+06	5.74681e+06	1	2525205	6	989	69	2
690700	249	523000	Pakuranga East	803	Pakuranga Ward	8	Manukau City	02	Auckland Region	2.67853e+06	6.47537e+06	1	690700	6	988	87	2
2132000	30	573101	Willis Street-Cambridge Terrace	4703	Lambton Ward	47	Wellington City	09	Wellington Region	2.65847e+06	5.98873e+06	1	2132000	5	959	10	2
2132100	63	573101	Willis Street-Cambridge Terrace	4703	Lambton Ward	47	Wellington City	09	Wellington Region	2.65856e+06	5.98871e+06	1	2132100	5	959	22	2
689700	177	523000	Pakuranga East	803	Pakuranga Ward	8	Manukau City	02	Auckland Region	2.67831e+06	6.475e+06	1	689700	5	967	62	2
821200	81	525921	Pukekohe West	1003	Pukekohe Ward	10	Franklin District	02	Auckland Region	2.67795e+06	6.44202e+06	1	821200	7	1009	28	2
2525207	36	588500	Kaimahi	6002	Fendalton-Waimairi Ward	60	Christchurch City	13	Canterbury Region	2.47738e+06	5.74672e+06	1	2525207	6	989	13	2
2131400	138	573101	Willis Street-Cambridge Terrace	4703	Lambton Ward	47	Wellington City	09	Wellington Region	2.65857e+06	5.98907e+06	1	2131400	7	1003	48	2
821302	183	525921	Pukekohe West	1003	Pukekohe Ward	10	Franklin District	02	Auckland Region	2.67859e+06	6.44186e+06	1	821302	6	994	64	2
821303	42	525921	Pukekohe West	1003	Pukekohe Ward	10	Franklin District	02	Auckland Region	2.67883e+06	6.44187e+06	1	821303	3	923	14	1
821301	99	525921	Pukekohe West	1003	Pukekohe Ward	10	Franklin District	02	Auckland Region	2.67836e+06	6.44191e+06	1	821301	3	923	33	1
2131200	177	573101	Willis Street-Cambridge Terrace	4703	Lambton Ward	47	Wellington City	09	Wellington Region	2.65879e+06	5.98924e+06	1	2131200	6	977	62	2
821400	48	525921	Pukekohe West	1003	Pukekohe Ward	10	Franklin District	02	Auckland Region	2.67903e+06	6.443e+06	1	821400	10	1206	22	3
2525400	108	588500	Kaimahi	6002	Fendalton-Waimairi Ward	60	Christchurch City	13	Canterbury Region	2.47717e+06	5.74662e+06	1	2525400	5	958	38	2
2131700	72	573101	Willis Street-Cambridge Terrace	4703	Lambton Ward	47	Wellington City	09	Wellington Region	2.65856e+06	5.98884e+06	1	2131700	9	1113	32	3
2132200	18	573101	Willis Street-Cambridge Terrace	4703	Lambton Ward	47	Wellington City	09	Wellington Region	2.65844e+06	5.98863e+06	1	2132200	8	1061	8	3
2131800	39	573101	Willis Street-Cambridge Terrace	4703	Lambton Ward	47	Wellington City	09	Wellington Region	2.65864e+06	5.98881e+06	1	2131800	9	1113	18	3
821600	123	525921	Pukekohe West	1003	Pukekohe Ward	10	Franklin District	02	Auckland Region	2.67897e+06	6.4426e+06	1	821600	8	1035	55	3
821800	237	525921	Pukekohe West	1003	Pukekohe Ward	10	Franklin District	02	Auckland Region	2.67864e+06	6.44272e+06	1	821800	8	1045	107	3
2132300	27	573101	Willis Street-Cambridge Terrace	4703	Lambton Ward	47	Wellington City	09	Wellington Region	2.65855e+06	5.9886e+06	1	2132300	7	1028	9	2
2132400	9	573101	Willis Street-Cambridge Terrace	4703	Lambton Ward	47	Wellington City	09	Wellington Region	2.65836e+06	5.9886e+06	1	2132400	8	1061	4	3
821101	144	525921	Pukekohe West	1003	Pukekohe Ward	10	Franklin District	02	Auckland Region	2.67825e+06	6.44229e+06	1	821101	3	935	48	1
821002	180	525921	Pukekohe West	1003	Pukekohe Ward	10	Franklin District	02	Auckland Region	2.67816e+06	6.44239e+06	1	821002	4	952	63	2
2525209	129	588500	Kaimahi	6002	Fendalton-Waimairi Ward	60	Christchurch City	13	Canterbury Region	2.47746e+06	5.74691e+06	1	2525209	5	960	45	2
2131900	33	573101	Willis Street-Cambridge Terrace	4703	Lambton Ward	47	Wellington City	09	Wellington Region	2.65839e+06	5.98872e+06	1	2131900	5	959	12	2
820900	126	525921	Pukekohe West	1003	Pukekohe Ward	10	Franklin District	02	Auckland Region	2.67787e+06	6.44224e+06	1	820900	3	935	42	1
821102	201	525921	Pukekohe West	1003	Pukekohe Ward	10	Franklin District	02	Auckland Region	2.6785e+06	6.44222e+06	1	821102	5	967	70	2
689800	159	523000	Pakuranga East	803	Pakuranga Ward	8	Manukau City	02	Auckland Region	2.67846e+06	6.47503e+06	1	689800	5	965	56	2
2525206	42	588500	Kaimahi	6002	Fendalton-Waimairi Ward	60	Christchurch City	13	Canterbury Region	2.47694e+06	5.74682e+06	1	2525206	6	989	15	2
2525208	18	588500	Kaimahi	6002	Fendalton-Waimairi Ward	60	Christchurch City	13	Canterbury Region	2.47739e+06	5.74682e+06	1	2525208	6	989	6	2
2525700	159	588500	Kaimahi	6002	Fendalton-Waimairi Ward	60	Christchurch City	13	Canterbury Region	2.47674e+06	5.74731e+06	1	2525700	5	970	56	2
820400	72	525910	Pukekohe North	1003	Pukekohe Ward	10	Franklin District	02	Auckland Region	2.67898e+06	6.44325e+06	1	820400	10	1253	32	3
2525300	57	588500	Kaimahi	6002	Fendalton-Waimairi Ward	60	Christchurch City	13	Canterbury Region	2.47688e+06	5.74671e+06	1	2525300	5	958	20	2
2528501	72	588402	Sawyers Arms	6001	Shirley-Papanui Ward	60	Christchurch City	13	Canterbury Region	2.47619e+06	5.74926e+06	1	2528501	5	959	25	2
562500	42	518500	Three Kings	702	Avondale-Roskill Ward	7	Auckland City	02	Auckland Region	2.66642e+06	6.47614e+06	1	562500	9	1073	19	3
2135100	72	573101	Willis Street-Cambridge Terrace	4703	Lambton Ward	47	Wellington City	09	Wellington Region	2.65859e+06	5.98838e+06	1	2135100	9	1127	32	3
2135600	222	573101	Willis Street-Cambridge Terrace	4703	Lambton Ward	47	Wellington City	09	Wellington Region	2.65909e+06	5.98897e+06	1	2135600	7	1029	78	2
431700	72	515302	Ponsonby East	701	Western Bays Ward	7	Auckland City	02	Auckland Region	2.66596e+06	6.48153e+06	1	431700	6	982	25	2
562300	183	518500	Three Kings	702	Avondale-Roskill Ward	7	Auckland City	02	Auckland Region	2.66655e+06	6.47624e+06	1	562300	10	1200	82	3
2528703	165	588402	Sawyers Arms	6001	Shirley-Papanui Ward	60	Christchurch City	13	Canterbury Region	2.477e+06	5.74758e+06	1	2528703	1	880	54	1
431600	111	515302	Ponsonby East	701	Western Bays Ward	7	Auckland City	02	Auckland Region	2.66577e+06	6.48151e+06	1	431600	6	982	39	2
431800	111	515302	Ponsonby East	701	Western Bays Ward	7	Auckland City	02	Auckland Region	2.66568e+06	6.48145e+06	1	431800	4	938	39	2
2790800	93	599500	Seaview	6404	Timaru Ward	64	Timaru District	13	Canterbury Region	2.36984e+06	5.64471e+06	1	2790800	7	1002	33	2
562900	126	518500	Three Kings	702	Avondale-Roskill Ward	7	Auckland City	02	Auckland Region	2.66637e+06	6.47587e+06	1	562900	9	1087	57	3
431400	54	515302	Ponsonby East	701	Western Bays Ward	7	Auckland City	02	Auckland Region	2.66553e+06	6.48149e+06	1	431400	4	952	19	2
2135900	72	573101	Willis Street-Cambridge Terrace	4703	Lambton Ward	47	Wellington City	09	Wellington Region	2.65908e+06	5.98881e+06	1	2135900	5	964	25	2
2135400	27	573101	Willis Street-Cambridge Terrace	4703	Lambton Ward	47	Wellington City	09	Wellington Region	2.6593e+06	5.98901e+06	1	2135400	5	974	9	2
822500	159	525921	Pukekohe West	1003	Pukekohe Ward	10	Franklin District	02	Auckland Region	2.67852e+06	6.44085e+06	1	822500	2	904	52	1
822900	132	525922	Bledisloe Park	1003	Pukekohe Ward	10	Franklin District	02	Auckland Region	2.67903e+06	6.44095e+06	1	822900	5	966	46	2
2135200	3	573101	Willis Street-Cambridge Terrace	4703	Lambton Ward	47	Wellington City	09	Wellington Region	2.65916e+06	5.98909e+06	1	2135200	5	974	1	2
823100	57	525922	Bledisloe Park	1003	Pukekohe Ward	10	Franklin District	02	Auckland Region	2.67935e+06	6.44255e+06	1	823100	9	1111	26	3
823000	6	525922	Bledisloe Park	1003	Pukekohe Ward	10	Franklin District	02	Auckland Region	2.67919e+06	6.44264e+06	1	823000	9	1111	3	3
823200	72	525922	Bledisloe Park	1003	Pukekohe Ward	10	Franklin District	02	Auckland Region	2.67959e+06	6.44258e+06	1	823200	9	1111	32	3
1477400	102	547800	Frimley	3005	Hastings Ward	30	Hastings District	06	Hawke's Bay Region	2.83851e+06	6.16833e+06	1	1477400	4	938	36	2
560500	168	518500	Three Kings	702	Avondale-Roskill Ward	7	Auckland City	02	Auckland Region	2.66582e+06	6.47634e+06	1	560500	10	1162	76	3
2526900	135	588500	Kaimahi	6002	Fendalton-Waimairi Ward	60	Christchurch City	13	Canterbury Region	2.47646e+06	5.74698e+06	1	2526900	2	912	45	1
2528704	63	588402	Sawyers Arms	6001	Shirley-Papanui Ward	60	Christchurch City	13	Canterbury Region	2.47711e+06	5.74748e+06	1	2528704	1	880	21	1
2526300	168	588500	Kaimahi	6002	Fendalton-Waimairi Ward	60	Christchurch City	13	Canterbury Region	2.47637e+06	5.7474e+06	1	2526300	4	942	59	2
560300	198	518500	Three Kings	702	Avondale-Roskill Ward	7	Auckland City	02	Auckland Region	2.66537e+06	6.47643e+06	1	560300	6	979	69	2
560400	189	518500	Three Kings	702	Avondale-Roskill Ward	7	Auckland City	02	Auckland Region	2.66554e+06	6.47634e+06	1	560400	4	945	66	2
2133700	105	573101	Willis Street-Cambridge Terrace	4703	Lambton Ward	47	Wellington City	09	Wellington Region	2.6588e+06	5.98874e+06	1	2133700	7	1003	37	2
691100	240	522810	Pakuranga North	803	Pakuranga Ward	8	Manukau City	02	Auckland Region	2.67849e+06	6.47554e+06	1	691100	6	988	84	2
690800	96	523000	Pakuranga East	803	Pakuranga Ward	8	Manukau City	02	Auckland Region	2.67867e+06	6.47532e+06	1	690800	6	996	34	2
560200	126	518500	Three Kings	702	Avondale-Roskill Ward	7	Auckland City	02	Auckland Region	2.66562e+06	6.47652e+06	1	560200	6	998	44	2
560700	114	518500	Three Kings	702	Avondale-Roskill Ward	7	Auckland City	02	Auckland Region	2.66616e+06	6.4762e+06	1	560700	7	1029	40	2
2526000	72	588500	Kaimahi	6002	Fendalton-Waimairi Ward	60	Christchurch City	13	Canterbury Region	2.47664e+06	5.74688e+06	1	2526000	5	962	25	2
561300	54	518500	Three Kings	702	Avondale-Roskill Ward	7	Auckland City	02	Auckland Region	2.66623e+06	6.47664e+06	1	561300	6	974	19	2
560600	54	518500	Three Kings	702	Avondale-Roskill Ward	7	Auckland City	02	Auckland Region	2.66595e+06	6.47631e+06	1	560600	6	998	19	2
2132700	9	573101	Willis Street-Cambridge Terrace	4703	Lambton Ward	47	Wellington City	09	Wellington Region	2.65836e+06	5.98848e+06	1	2132700	8	1061	4	3
823600	15	525922	Bledisloe Park	1003	Pukekohe Ward	10	Franklin District	02	Auckland Region	2.67999e+06	6.44186e+06	1	823600	9	1111	7	3
822300	144	525921	Pukekohe West	1003	Pukekohe Ward	10	Franklin District	02	Auckland Region	2.67893e+06	6.44206e+06	1	822300	7	1018	50	2
1477800	90	547800	Frimley	3005	Hastings Ward	30	Hastings District	06	Hawke's Bay Region	2.83877e+06	6.16806e+06	1	1477800	8	1041	40	3
2526100	66	588500	Kaimahi	6002	Fendalton-Waimairi Ward	60	Christchurch City	13	Canterbury Region	2.47653e+06	5.74673e+06	1	2526100	4	948	23	2
2526600	123	588500	Kaimahi	6002	Fendalton-Waimairi Ward	60	Christchurch City	13	Canterbury Region	2.47649e+06	5.74721e+06	1	2526600	5	962	43	2
2525900	288	588500	Kaimahi	6002	Fendalton-Waimairi Ward	60	Christchurch City	13	Canterbury Region	2.47691e+06	5.74711e+06	1	2525900	3	932	95	1
2132800	39	573101	Willis Street-Cambridge Terrace	4703	Lambton Ward	47	Wellington City	09	Wellington Region	2.65845e+06	5.98843e+06	1	2132800	8	1061	18	3
823500	24	525922	Bledisloe Park	1003	Pukekohe Ward	10	Franklin District	02	Auckland Region	2.67971e+06	6.44154e+06	1	823500	9	1111	11	3
822401	318	525921	Pukekohe West	1003	Pukekohe Ward	10	Franklin District	02	Auckland Region	2.67809e+06	6.44154e+06	1	822401	3	928	105	1
692202	66	522820	Sunnyhills	803	Pakuranga Ward	8	Manukau City	02	Auckland Region	2.67835e+06	6.47561e+06	1	692202	1	876	22	1
691300	201	522810	Pakuranga North	803	Pakuranga Ward	8	Manukau City	02	Auckland Region	2.67895e+06	6.47589e+06	1	691300	6	985	70	2
2134100	273	573101	Willis Street-Cambridge Terrace	4703	Lambton Ward	47	Wellington City	09	Wellington Region	2.65876e+06	5.9886e+06	1	2134100	9	1110	123	3
822405	153	525921	Pukekohe West	1003	Pukekohe Ward	10	Franklin District	02	Auckland Region	2.67882e+06	6.44116e+06	1	822405	6	997	54	2
1477500	195	547800	Frimley	3005	Hastings Ward	30	Hastings District	06	Hawke's Bay Region	2.83873e+06	6.16835e+06	1	1477500	6	977	68	2
2527500	96	588500	Kaimahi	6002	Fendalton-Waimairi Ward	60	Christchurch City	13	Canterbury Region	2.4763e+06	5.74757e+06	1	2527500	2	908	32	1
2789200	156	599400	Fraser Park	6404	Timaru Ward	64	Timaru District	13	Canterbury Region	2.36944e+06	5.64451e+06	1	2789200	4	939	55	2
2133900	15	573101	Willis Street-Cambridge Terrace	4703	Lambton Ward	47	Wellington City	09	Wellington Region	2.65898e+06	5.98858e+06	1	2133900	7	1003	5	2
690900	144	523000	Pakuranga East	803	Pakuranga Ward	8	Manukau City	02	Auckland Region	2.67859e+06	6.47521e+06	1	690900	9	1084	65	3
2133500	87	573101	Willis Street-Cambridge Terrace	4703	Lambton Ward	47	Wellington City	09	Wellington Region	2.65876e+06	5.98894e+06	1	2133500	7	1009	30	2
559800	222	518500	Three Kings	702	Avondale-Roskill Ward	7	Auckland City	02	Auckland Region	2.66554e+06	6.47692e+06	1	559800	3	931	73	1
822800	45	525922	Bledisloe Park	1003	Pukekohe Ward	10	Franklin District	02	Auckland Region	2.679e+06	6.44042e+06	1	822800	2	914	15	1
822702	84	525921	Pukekohe West	1003	Pukekohe Ward	10	Franklin District	02	Auckland Region	2.67882e+06	6.44083e+06	1	822702	3	932	28	1
822703	90	525921	Pukekohe West	1003	Pukekohe Ward	10	Franklin District	02	Auckland Region	2.67867e+06	6.44062e+06	1	822703	3	932	30	1
823300	9	525922	Bledisloe Park	1003	Pukekohe Ward	10	Franklin District	02	Auckland Region	2.67972e+06	6.44227e+06	1	823300	4	944	3	2
822000	57	525921	Pukekohe West	1003	Pukekohe Ward	10	Franklin District	02	Auckland Region	2.67865e+06	6.44242e+06	1	822000	7	1015	20	2
821900	93	525921	Pukekohe West	1003	Pukekohe Ward	10	Franklin District	02	Auckland Region	2.67887e+06	6.4423e+06	1	821900	7	1018	33	2
1478700	30	548500	Camberley	3005	Hastings Ward	30	Hastings District	06	Hawke's Bay Region	2.83837e+06	6.16825e+06	1	1478700	10	1311	14	3
560000	183	518500	Three Kings	702	Avondale-Roskill Ward	7	Auckland City	02	Auckland Region	2.66546e+06	6.47667e+06	1	560000	5	954	64	2
2526400	162	588500	Kaimahi	6002	Fendalton-Waimairi Ward	60	Christchurch City	13	Canterbury Region	2.47655e+06	5.7474e+06	1	2526400	3	919	53	1
2132900	12	573101	Willis Street-Cambridge Terrace	4703	Lambton Ward	47	Wellington City	09	Wellington Region	2.65829e+06	5.98851e+06	1	2132900	8	1061	5	3
691000	132	523000	Pakuranga East	803	Pakuranga Ward	8	Manukau City	02	Auckland Region	2.67869e+06	6.47509e+06	1	691000	6	996	46	2
2133300	39	573101	Willis Street-Cambridge Terrace	4703	Lambton Ward	47	Wellington City	09	Wellington Region	2.65885e+06	5.98913e+06	1	2133300	7	1009	14	2
2133400	267	573101	Willis Street-Cambridge Terrace	4703	Lambton Ward	47	Wellington City	09	Wellington Region	2.65886e+06	5.98889e+06	1	2133400	6	992	93	2
822705	27	525921	Pukekohe West	1003	Pukekohe Ward	10	Franklin District	02	Auckland Region	2.67854e+06	6.4401e+06	1	822705	5	959	9	2
2133000	9	573101	Willis Street-Cambridge Terrace	4703	Lambton Ward	47	Wellington City	09	Wellington Region	2.65902e+06	5.98926e+06	1	2133000	7	1009	3	2
822200	165	525921	Pukekohe West	1003	Pukekohe Ward	10	Franklin District	02	Auckland Region	2.6788e+06	6.44208e+06	1	822200	7	1015	58	2
822100	174	525921	Pukekohe West	1003	Pukekohe Ward	10	Franklin District	02	Auckland Region	2.67864e+06	6.44219e+06	1	822100	6	991	61	2
1477700	75	547800	Frimley	3005	Hastings Ward	30	Hastings District	06	Hawke's Bay Region	2.83863e+06	6.16818e+06	1	1477700	5	955	26	2
2526200	171	588500	Kaimahi	6002	Fendalton-Waimairi Ward	60	Christchurch City	13	Canterbury Region	2.47671e+06	5.74672e+06	1	2526200	3	920	56	1
2527202	57	588500	Kaimahi	6002	Fendalton-Waimairi Ward	60	Christchurch City	13	Canterbury Region	2.476e+06	5.74781e+06	1	2527202	3	920	19	1
561200	87	518500	Three Kings	702	Avondale-Roskill Ward	7	Auckland City	02	Auckland Region	2.6659e+06	6.47676e+06	1	561200	6	974	30	2
2133200	153	573101	Willis Street-Cambridge Terrace	4703	Lambton Ward	47	Wellington City	09	Wellington Region	2.65894e+06	5.98906e+06	1	2133200	9	1106	69	3
433801	12	514102	Auckland Central West	704	Hobson Ward	7	Auckland City	02	Auckland Region	2.66753e+06	6.48213e+06	1	433801	10	1198	5	3
695102	78	522820	Sunnyhills	803	Pakuranga Ward	8	Manukau City	02	Auckland Region	2.67828e+06	6.47542e+06	1	695102	1	893	26	1
564400	156	518600	Royal Oak	702	Avondale-Roskill Ward	7	Auckland City	02	Auckland Region	2.66723e+06	6.47577e+06	1	564400	3	920	51	1
2137700	36	576600	Oriental Bay	4703	Lambton Ward	47	Wellington City	09	Wellington Region	2.66034e+06	5.98907e+06	1	2137700	4	937	13	2
826000	75	521112	Eden Road-Hill Top	1002	Northern Ward	10	Franklin District	02	Auckland Region	2.67699e+06	6.44057e+06	1	826000	4	938	26	2
695900	144	523401	Grange	802	Papatoetoe Ward	8	Manukau City	02	Auckland Region	2.67522e+06	6.46959e+06	1	695900	6	986	50	2
433003	165	514101	Auckland Harbourside	704	Hobson Ward	7	Auckland City	02	Auckland Region	2.66756e+06	6.48259e+06	1	433003	6	982	58	2
433403	81	514102	Auckland Central West	704	Hobson Ward	7	Auckland City	02	Auckland Region	2.66753e+06	6.48225e+06	1	433403	10	1152	36	3
564502	138	518600	Royal Oak	702	Avondale-Roskill Ward	7	Auckland City	02	Auckland Region	2.6675e+06	6.47579e+06	1	564502	2	917	46	1
2791700	66	599500	Seaview	6404	Timaru Ward	64	Timaru District	13	Canterbury Region	2.37024e+06	5.64466e+06	1	2791700	8	1051	30	3
2791500	147	599500	Seaview	6404	Timaru Ward	64	Timaru District	13	Canterbury Region	2.37007e+06	5.64477e+06	1	2791500	8	1051	66	3
433303	306	514102	Auckland Central West	704	Hobson Ward	7	Auckland City	02	Auckland Region	2.6674e+06	6.4823e+06	1	433303	10	1167	138	3
171603	72	505805	Orewa	403	Eastern Ward	4	Rodney District	02	Auckland Region	2.66188e+06	6.51174e+06	1	171603	8	1067	32	3
433102	87	514102	Auckland Central West	704	Hobson Ward	7	Auckland City	02	Auckland Region	2.66777e+06	6.48257e+06	1	433102	9	1103	39	3
433304	87	514102	Auckland Central West	704	Hobson Ward	7	Auckland City	02	Auckland Region	2.66747e+06	6.48228e+06	1	433304	9	1100	39	3
2659800	174	594700	Addington	6006	Spreydon-Heathcote Ward	60	Christchurch City	13	Canterbury Region	2.47929e+06	5.74019e+06	1	2659800	9	1109	78	3
2791000	126	599500	Seaview	6404	Timaru Ward	64	Timaru District	13	Canterbury Region	2.36987e+06	5.64449e+06	1	2791000	8	1037	57	3
2791100	72	599500	Seaview	6404	Timaru Ward	64	Timaru District	13	Canterbury Region	2.36967e+06	5.64434e+06	1	2791100	5	965	25	2
561800	123	518500	Three Kings	702	Avondale-Roskill Ward	7	Auckland City	02	Auckland Region	2.66588e+06	6.47645e+06	1	561800	10	1164	55	3
2528802	117	588402	Sawyers Arms	6001	Shirley-Papanui Ward	60	Christchurch City	13	Canterbury Region	2.47701e+06	5.74736e+06	1	2528802	4	935	41	2
2527601	174	588500	Kaimahi	6002	Fendalton-Waimairi Ward	60	Christchurch City	13	Canterbury Region	2.47616e+06	5.74737e+06	1	2527601	2	907	57	1
2660300	147	594700	Addington	6006	Spreydon-Heathcote Ward	60	Christchurch City	13	Canterbury Region	2.47891e+06	5.74018e+06	1	2660300	10	1442	66	3
2660100	297	594700	Addington	6006	Spreydon-Heathcote Ward	60	Christchurch City	13	Canterbury Region	2.47882e+06	5.74036e+06	1	2660100	9	1119	134	3
431900	54	515302	Ponsonby East	701	Western Bays Ward	7	Auckland City	02	Auckland Region	2.66595e+06	6.48147e+06	1	431900	4	938	19	2
2134600	108	573101	Willis Street-Cambridge Terrace	4703	Lambton Ward	47	Wellington City	09	Wellington Region	2.65857e+06	5.98846e+06	1	2134600	9	1127	49	3
2135700	93	573101	Willis Street-Cambridge Terrace	4703	Lambton Ward	47	Wellington City	09	Wellington Region	2.65928e+06	5.98889e+06	1	2135700	5	974	33	2
431300	123	515302	Ponsonby East	701	Western Bays Ward	7	Auckland City	02	Auckland Region	2.66576e+06	6.48156e+06	1	431300	4	950	43	2
823900	78	525922	Bledisloe Park	1003	Pukekohe Ward	10	Franklin District	02	Auckland Region	2.67955e+06	6.4419e+06	1	823900	7	1003	27	2
562800	162	518500	Three Kings	702	Avondale-Roskill Ward	7	Auckland City	02	Auckland Region	2.66623e+06	6.47593e+06	1	562800	9	1094	73	3
2528400	57	588402	Sawyers Arms	6001	Shirley-Papanui Ward	60	Christchurch City	13	Canterbury Region	2.47746e+06	5.74727e+06	1	2528400	4	940	20	2
561600	72	518500	Three Kings	702	Avondale-Roskill Ward	7	Auckland City	02	Auckland Region	2.66591e+06	6.47655e+06	1	561600	4	953	25	2
432000	102	515302	Ponsonby East	701	Western Bays Ward	7	Auckland City	02	Auckland Region	2.66579e+06	6.48139e+06	1	432000	3	927	34	1
2134800	177	573101	Willis Street-Cambridge Terrace	4703	Lambton Ward	47	Wellington City	09	Wellington Region	2.65877e+06	5.98843e+06	1	2134800	10	1232	80	3
563000	87	518500	Three Kings	702	Avondale-Roskill Ward	7	Auckland City	02	Auckland Region	2.66647e+06	6.47592e+06	1	563000	10	1141	39	3
824000	129	525922	Bledisloe Park	1003	Pukekohe Ward	10	Franklin District	02	Auckland Region	2.67936e+06	6.44188e+06	1	824000	7	1003	45	2
2528801	60	588402	Sawyers Arms	6001	Shirley-Papanui Ward	60	Christchurch City	13	Canterbury Region	2.47661e+06	5.74757e+06	1	2528801	3	923	20	1
2790700	135	599500	Seaview	6404	Timaru Ward	64	Timaru District	13	Canterbury Region	2.36966e+06	5.64472e+06	1	2790700	5	970	47	2
2659301	3	594700	Addington	6006	Spreydon-Heathcote Ward	60	Christchurch City	13	Canterbury Region	2.47909e+06	5.74069e+06	1	2659301	9	1091	1	3
2660200	126	594700	Addington	6006	Spreydon-Heathcote Ward	60	Christchurch City	13	Canterbury Region	2.47868e+06	5.74024e+06	1	2660200	9	1102	57	3
563200	183	518500	Three Kings	702	Avondale-Roskill Ward	7	Auckland City	02	Auckland Region	2.66706e+06	6.47607e+06	1	563200	2	917	60	1
2135000	9	573101	Willis Street-Cambridge Terrace	4703	Lambton Ward	47	Wellington City	09	Wellington Region	2.65883e+06	5.98836e+06	1	2135000	9	1127	4	3
562400	147	518500	Three Kings	702	Avondale-Roskill Ward	7	Auckland City	02	Auckland Region	2.66673e+06	6.47635e+06	1	562400	9	1095	66	3
823700	48	525922	Bledisloe Park	1003	Pukekohe Ward	10	Franklin District	02	Auckland Region	2.67977e+06	6.4408e+06	1	823700	9	1111	22	3
563100	174	518500	Three Kings	702	Avondale-Roskill Ward	7	Auckland City	02	Auckland Region	2.66669e+06	6.476e+06	1	563100	10	1220	78	3
432100	102	515302	Ponsonby East	701	Western Bays Ward	7	Auckland City	02	Auckland Region	2.66598e+06	6.4814e+06	1	432100	3	921	34	1
2790900	90	599500	Seaview	6404	Timaru Ward	64	Timaru District	13	Canterbury Region	2.36967e+06	5.64453e+06	1	2790900	5	965	31	2
2134400	15	573101	Willis Street-Cambridge Terrace	4703	Lambton Ward	47	Wellington City	09	Wellington Region	2.6586e+06	5.98859e+06	1	2134400	7	1028	5	2
2136000	162	573101	Willis Street-Cambridge Terrace	4703	Lambton Ward	47	Wellington City	09	Wellington Region	2.65922e+06	5.98876e+06	1	2136000	5	962	57	2
561500	81	518500	Three Kings	702	Avondale-Roskill Ward	7	Auckland City	02	Auckland Region	2.66621e+06	6.47657e+06	1	561500	4	947	28	2
562200	120	518500	Three Kings	702	Avondale-Roskill Ward	7	Auckland City	02	Auckland Region	2.66641e+06	6.47631e+06	1	562200	10	1153	54	3
2791200	138	599500	Seaview	6404	Timaru Ward	64	Timaru District	13	Canterbury Region	2.36988e+06	5.64428e+06	1	2791200	9	1089	62	3
2659500	198	594700	Addington	6006	Spreydon-Heathcote Ward	60	Christchurch City	13	Canterbury Region	2.47903e+06	5.74041e+06	1	2659500	7	1008	69	2
431500	51	515302	Ponsonby East	701	Western Bays Ward	7	Auckland City	02	Auckland Region	2.66562e+06	6.4815e+06	1	431500	4	952	18	2
2134900	297	573101	Willis Street-Cambridge Terrace	4703	Lambton Ward	47	Wellington City	09	Wellington Region	2.65888e+06	5.98847e+06	1	2134900	8	1033	134	3
2134500	9	573101	Willis Street-Cambridge Terrace	4703	Lambton Ward	47	Wellington City	09	Wellington Region	2.65868e+06	5.98853e+06	1	2134500	7	1028	3	2
561900	150	518500	Three Kings	702	Avondale-Roskill Ward	7	Auckland City	02	Auckland Region	2.66616e+06	6.47636e+06	1	561900	6	983	52	2
824302	45	521113	Buckland	1004	Southern Ward	10	Franklin District	03	Waikato Region	2.68054e+06	6.43954e+06	1	824302	3	926	15	1
824100	219	525922	Bledisloe Park	1003	Pukekohe Ward	10	Franklin District	02	Auckland Region	2.67913e+06	6.44189e+06	1	824100	7	1013	77	2
561700	78	518500	Three Kings	702	Avondale-Roskill Ward	7	Auckland City	02	Auckland Region	2.66618e+06	6.47648e+06	1	561700	4	953	27	2
562000	102	518500	Three Kings	702	Avondale-Roskill Ward	7	Auckland City	02	Auckland Region	2.66641e+06	6.4765e+06	1	562000	8	1044	46	3
2528600	42	588402	Sawyers Arms	6001	Shirley-Papanui Ward	60	Christchurch City	13	Canterbury Region	2.47631e+06	5.74773e+06	1	2528600	1	894	14	1
2659900	177	594700	Addington	6006	Spreydon-Heathcote Ward	60	Christchurch City	13	Canterbury Region	2.47911e+06	5.74006e+06	1	2659900	10	1146	80	3
2659600	159	594700	Addington	6006	Spreydon-Heathcote Ward	60	Christchurch City	13	Canterbury Region	2.47924e+06	5.74037e+06	1	2659600	10	1185	72	3
2659700	96	594700	Addington	6006	Spreydon-Heathcote Ward	60	Christchurch City	13	Canterbury Region	2.47939e+06	5.74037e+06	1	2659700	10	1146	43	3
2136100	24	573101	Willis Street-Cambridge Terrace	4703	Lambton Ward	47	Wellington City	09	Wellington Region	2.65925e+06	5.98866e+06	1	2136100	2	917	8	1
434402	201	514102	Auckland Central West	704	Hobson Ward	7	Auckland City	02	Auckland Region	2.66701e+06	6.48175e+06	1	434402	9	1112	90	3
2794200	45	599500	Seaview	6404	Timaru Ward	64	Timaru District	13	Canterbury Region	2.37022e+06	5.64406e+06	1	2794200	9	1117	20	3
2794300	18	599500	Seaview	6404	Timaru Ward	64	Timaru District	13	Canterbury Region	2.3703e+06	5.64409e+06	1	2794300	9	1117	8	3
2794400	9	599500	Seaview	6404	Timaru Ward	64	Timaru District	13	Canterbury Region	2.37042e+06	5.64412e+06	1	2794400	9	1117	4	3
2794800	15	599500	Seaview	6404	Timaru Ward	64	Timaru District	13	Canterbury Region	2.3705e+06	5.64387e+06	1	2794800	9	1117	7	3
3187903	111	612802	Riverton West	7305	Riverton Ward	73	Southland District	15	Southland Region	2.12694e+06	5.41491e+06	1	3187903	6	980	39	2
3187801	21	612730	Te Waewae	7305	Riverton Ward	73	Southland District	15	Southland Region	2.12483e+06	5.4166e+06	1	3187801	7	1027	7	2
1482600	123	547900	Raureka	3005	Hastings Ward	30	Hastings District	06	Hawke's Bay Region	2.83871e+06	6.1657e+06	1	1482600	5	968	43	2
2138900	63	573400	Mt Victoria West	4703	Lambton Ward	47	Wellington City	09	Wellington Region	2.65955e+06	5.9889e+06	1	2138900	8	1050	28	3
2138600	81	573400	Mt Victoria West	4703	Lambton Ward	47	Wellington City	09	Wellington Region	2.65977e+06	5.98889e+06	1	2138600	1	888	27	1
2138800	111	573400	Mt Victoria West	4703	Lambton Ward	47	Wellington City	09	Wellington Region	2.65965e+06	5.98899e+06	1	2138800	4	942	39	2
435500	78	514102	Auckland Central West	704	Hobson Ward	7	Auckland City	02	Auckland Region	2.66719e+06	6.48135e+06	1	435500	8	1062	35	3
696803	384	522301	Dingwall	802	Papatoetoe Ward	8	Manukau City	02	Auckland Region	2.67592e+06	6.46945e+06	1	696803	5	955	134	2
696701	21	523401	Grange	802	Papatoetoe Ward	8	Manukau City	02	Auckland Region	2.67539e+06	6.47001e+06	1	696701	10	1283	9	3
2662100	75	591900	Papanui	6001	Shirley-Papanui Ward	60	Christchurch City	13	Canterbury Region	2.47866e+06	5.74557e+06	1	2662100	8	1056	34	3
172603	111	505802	Red Beach	403	Eastern Ward	4	Rodney District	02	Auckland Region	2.66152e+06	6.50953e+06	1	172603	3	927	37	1
434902	36	514102	Auckland Central West	704	Hobson Ward	7	Auckland City	02	Auckland Region	2.66733e+06	6.48159e+06	1	434902	9	1130	16	3
566500	195	518600	Royal Oak	704	Hobson Ward	7	Auckland City	02	Auckland Region	2.66837e+06	6.47609e+06	1	566500	6	975	68	2
2139000	126	573400	Mt Victoria West	4703	Lambton Ward	47	Wellington City	09	Wellington Region	2.65946e+06	5.98881e+06	1	2139000	6	995	44	2
2138200	147	576600	Oriental Bay	4703	Lambton Ward	47	Wellington City	09	Wellington Region	2.66023e+06	5.98901e+06	1	2138200	3	933	49	1
2138700	69	573400	Mt Victoria West	4703	Lambton Ward	47	Wellington City	09	Wellington Region	2.65973e+06	5.98897e+06	1	2138700	8	1050	31	3
434401	201	514102	Auckland Central West	704	Hobson Ward	7	Auckland City	02	Auckland Region	2.66709e+06	6.48189e+06	1	434401	8	1037	90	3
2661700	81	591900	Papanui	6001	Shirley-Papanui Ward	60	Christchurch City	13	Canterbury Region	2.4787e+06	5.74568e+06	1	2661700	7	1013	28	2
172803	144	505802	Red Beach	403	Eastern Ward	4	Rodney District	02	Auckland Region	2.66169e+06	6.50913e+06	1	172803	5	960	50	2
695002	189	522820	Sunnyhills	803	Pakuranga Ward	8	Manukau City	02	Auckland Region	2.67798e+06	6.47529e+06	1	695002	2	903	62	1
433001	60	514101	Auckland Harbourside	704	Hobson Ward	7	Auckland City	02	Auckland Region	2.66762e+06	6.48277e+06	1	433001	4	939	21	2
2792800	6	599500	Seaview	6404	Timaru Ward	64	Timaru District	13	Canterbury Region	2.37067e+06	5.6444e+06	1	2792800	8	1061	3	3
2791900	78	599500	Seaview	6404	Timaru Ward	64	Timaru District	13	Canterbury Region	2.3701e+06	5.64444e+06	1	2791900	6	989	27	2
2792000	33	599500	Seaview	6404	Timaru Ward	64	Timaru District	13	Canterbury Region	2.37029e+06	5.64447e+06	1	2792000	6	989	12	2
2793100	3	599500	Seaview	6404	Timaru Ward	64	Timaru District	13	Canterbury Region	2.37119e+06	5.64418e+06	1	2793100	8	1061	1	3
2792700	66	599500	Seaview	6404	Timaru Ward	64	Timaru District	13	Canterbury Region	2.37076e+06	5.64448e+06	1	2792700	8	1061	30	3
50304	45	501200	Haruru Falls	102	Eastern Ward	1	Far North District	01	Northland Region	2.60639e+06	6.65734e+06	1	50304	5	958	16	2
2137000	3	573101	Willis Street-Cambridge Terrace	4703	Lambton Ward	47	Wellington City	09	Wellington Region	2.659e+06	5.9883e+06	1	2137000	8	1052	1	3
1482400	111	547900	Raureka	3005	Hastings Ward	30	Hastings District	06	Hawke's Bay Region	2.83887e+06	6.16587e+06	1	1482400	7	1019	39	2
564600	144	518600	Royal Oak	702	Avondale-Roskill Ward	7	Auckland City	02	Auckland Region	2.66738e+06	6.47562e+06	1	564600	4	949	50	2
433402	246	514102	Auckland Central West	704	Hobson Ward	7	Auckland City	02	Auckland Region	2.66756e+06	6.48229e+06	1	433402	10	1213	111	3
433501	84	514102	Auckland Central West	704	Hobson Ward	7	Auckland City	02	Auckland Region	2.66779e+06	6.48233e+06	1	433501	10	1188	38	3
564900	132	518600	Royal Oak	702	Avondale-Roskill Ward	7	Auckland City	02	Auckland Region	2.66777e+06	6.47571e+06	1	564900	7	1000	46	2
2660400	168	594700	Addington	6006	Spreydon-Heathcote Ward	60	Christchurch City	13	Canterbury Region	2.47862e+06	5.74009e+06	1	2660400	9	1115	76	3
433502	132	514102	Auckland Central West	704	Hobson Ward	7	Auckland City	02	Auckland Region	2.66775e+06	6.48228e+06	1	433502	10	1161	59	3
3185900	12	612740	Fairfax	7305	Riverton Ward	73	Southland District	15	Southland Region	2.12742e+06	5.41793e+06	1	3185900	5	960	4	2
2136600	51	573101	Willis Street-Cambridge Terrace	4703	Lambton Ward	47	Wellington City	09	Wellington Region	2.65906e+06	5.9885e+06	1	2136600	8	1052	23	3
2136400	216	573101	Willis Street-Cambridge Terrace	4703	Lambton Ward	47	Wellington City	09	Wellington Region	2.65902e+06	5.98866e+06	1	2136400	6	991	76	2
564700	114	518600	Royal Oak	702	Avondale-Roskill Ward	7	Auckland City	02	Auckland Region	2.6675e+06	6.47557e+06	1	564700	3	932	38	1
825900	90	521112	Eden Road-Hill Top	1002	Northern Ward	10	Franklin District	02	Auckland Region	2.6769e+06	6.44107e+06	1	825900	4	938	31	2
433301	333	514102	Auckland Central West	704	Hobson Ward	7	Auckland City	02	Auckland Region	2.66746e+06	6.48238e+06	1	433301	8	1041	150	3
433503	111	514102	Auckland Central West	704	Hobson Ward	7	Auckland City	02	Auckland Region	2.66782e+06	6.48224e+06	1	433503	10	1188	50	3
2136700	21	573101	Willis Street-Cambridge Terrace	4703	Lambton Ward	47	Wellington City	09	Wellington Region	2.65916e+06	5.98843e+06	1	2136700	8	1052	9	3
433103	135	514102	Auckland Central West	704	Hobson Ward	7	Auckland City	02	Auckland Region	2.66769e+06	6.48244e+06	1	433103	9	1103	61	3
564000	165	518600	Royal Oak	702	Avondale-Roskill Ward	7	Auckland City	02	Auckland Region	2.66723e+06	6.47605e+06	1	564000	4	952	58	2
171400	93	505805	Orewa	403	Eastern Ward	4	Rodney District	02	Auckland Region	2.66206e+06	6.51181e+06	1	171400	4	943	33	2
2137600	174	576600	Oriental Bay	4703	Lambton Ward	47	Wellington City	09	Wellington Region	2.66049e+06	5.98904e+06	1	2137600	4	937	61	2
2137400	75	576600	Oriental Bay	4703	Lambton Ward	47	Wellington City	09	Wellington Region	2.66059e+06	5.98927e+06	1	2137400	1	885	25	1
432200	123	515302	Ponsonby East	701	Western Bays Ward	7	Auckland City	02	Auckland Region	2.66571e+06	6.4813e+06	1	432200	2	908	41	1
695800	189	523401	Grange	802	Papatoetoe Ward	8	Manukau City	02	Auckland Region	2.67539e+06	6.46955e+06	1	695800	8	1037	85	3
826603	141	525910	Pukekohe North	1003	Pukekohe Ward	10	Franklin District	02	Auckland Region	2.67883e+06	6.44445e+06	1	826603	1	885	47	1
564100	147	518600	Royal Oak	702	Avondale-Roskill Ward	7	Auckland City	02	Auckland Region	2.66735e+06	6.47603e+06	1	564100	2	910	49	1
2662000	36	591900	Papanui	6001	Shirley-Papanui Ward	60	Christchurch City	13	Canterbury Region	2.47852e+06	5.74559e+06	1	2662000	4	948	13	2
171500	183	505805	Orewa	403	Eastern Ward	4	Rodney District	02	Auckland Region	2.66204e+06	6.51156e+06	1	171500	9	1101	82	3
2792500	18	599500	Seaview	6404	Timaru Ward	64	Timaru District	13	Canterbury Region	2.37037e+06	5.6447e+06	1	2792500	8	1051	8	3
432300	69	515302	Ponsonby East	701	Western Bays Ward	7	Auckland City	02	Auckland Region	2.66597e+06	6.48133e+06	1	432300	3	921	23	1
433005	54	514101	Auckland Harbourside	704	Hobson Ward	7	Auckland City	02	Auckland Region	2.66743e+06	6.48264e+06	1	433005	1	888	18	1
433802	135	514102	Auckland Central West	704	Hobson Ward	7	Auckland City	02	Auckland Region	2.66758e+06	6.4821e+06	1	433802	10	1198	61	3
2136200	84	573101	Willis Street-Cambridge Terrace	4703	Lambton Ward	47	Wellington City	09	Wellington Region	2.65922e+06	5.98862e+06	1	2136200	2	917	28	1
695101	27	522820	Sunnyhills	803	Pakuranga Ward	8	Manukau City	02	Auckland Region	2.67826e+06	6.47557e+06	1	695101	1	893	9	1
564800	123	518600	Royal Oak	702	Avondale-Roskill Ward	7	Auckland City	02	Auckland Region	2.6678e+06	6.47582e+06	1	564800	2	904	41	1
2792100	9	599500	Seaview	6404	Timaru Ward	64	Timaru District	13	Canterbury Region	2.37043e+06	5.64445e+06	1	2792100	8	1061	4	3
2791600	123	599500	Seaview	6404	Timaru Ward	64	Timaru District	13	Canterbury Region	2.37003e+06	5.64467e+06	1	2791600	7	1014	43	2
2791800	99	599500	Seaview	6404	Timaru Ward	64	Timaru District	13	Canterbury Region	2.37009e+06	5.64455e+06	1	2791800	5	958	35	2
433600	33	514102	Auckland Central West	704	Hobson Ward	7	Auckland City	02	Auckland Region	2.66775e+06	6.48219e+06	1	433600	10	1152	15	3
2136900	3	573101	Willis Street-Cambridge Terrace	4703	Lambton Ward	47	Wellington City	09	Wellington Region	2.65912e+06	5.98834e+06	1	2136900	8	1052	1	3
2136500	60	573101	Willis Street-Cambridge Terrace	4703	Lambton Ward	47	Wellington City	09	Wellington Region	2.65914e+06	5.98854e+06	1	2136500	8	1052	27	3
433101	105	514102	Auckland Central West	704	Hobson Ward	7	Auckland City	02	Auckland Region	2.66768e+06	6.48258e+06	1	433101	8	1049	47	3
432700	60	514102	Auckland Central West	704	Hobson Ward	7	Auckland City	02	Auckland Region	2.66696e+06	6.4821e+06	1	432700	7	1001	21	2
826100	42	521112	Eden Road-Hill Top	1002	Northern Ward	10	Franklin District	02	Auckland Region	2.67728e+06	6.44008e+06	1	826100	4	938	15	2
432900	135	514101	Auckland Harbourside	704	Hobson Ward	7	Auckland City	02	Auckland Region	2.6679e+06	6.48259e+06	1	432900	7	1023	47	2
433401	9	514102	Auckland Central West	704	Hobson Ward	7	Auckland City	02	Auckland Region	2.66763e+06	6.48228e+06	1	433401	10	1152	4	3
2661800	60	591900	Papanui	6001	Shirley-Papanui Ward	60	Christchurch City	13	Canterbury Region	2.47854e+06	5.74572e+06	1	2661800	7	1013	21	2
433200	201	514102	Auckland Central West	704	Hobson Ward	7	Auckland City	02	Auckland Region	2.66787e+06	6.48246e+06	1	433200	10	1168	90	3
2792200	54	599500	Seaview	6404	Timaru Ward	64	Timaru District	13	Canterbury Region	2.37018e+06	5.64433e+06	1	2792200	6	989	19	2
2792300	27	599500	Seaview	6404	Timaru Ward	64	Timaru District	13	Canterbury Region	2.37035e+06	5.64433e+06	1	2792300	8	1061	12	3
2793000	15	599500	Seaview	6404	Timaru Ward	64	Timaru District	13	Canterbury Region	2.37092e+06	5.64425e+06	1	2793000	8	1061	7	3
433302	258	514102	Auckland Central West	704	Hobson Ward	7	Auckland City	02	Auckland Region	2.66751e+06	6.48231e+06	1	433302	7	1010	90	2
432600	312	514102	Auckland Central West	704	Hobson Ward	7	Auckland City	02	Auckland Region	2.66725e+06	6.48238e+06	1	432600	7	1008	109	2
432800	15	514101	Auckland Harbourside	704	Hobson Ward	7	Auckland City	02	Auckland Region	2.66778e+06	6.48274e+06	1	432800	10	1188	7	3
2136300	150	573101	Willis Street-Cambridge Terrace	4703	Lambton Ward	47	Wellington City	09	Wellington Region	2.6589e+06	5.9887e+06	1	2136300	5	964	52	2
564501	111	518600	Royal Oak	702	Avondale-Roskill Ward	7	Auckland City	02	Auckland Region	2.66753e+06	6.47592e+06	1	564501	1	887	37	1
2137500	123	576600	Oriental Bay	4703	Lambton Ward	47	Wellington City	09	Wellington Region	2.66052e+06	5.98914e+06	1	2137500	3	930	41	1
695700	96	523401	Grange	802	Papatoetoe Ward	8	Manukau City	02	Auckland Region	2.67523e+06	6.46981e+06	1	695700	10	1213	43	3
2661900	66	591900	Papanui	6001	Shirley-Papanui Ward	60	Christchurch City	13	Canterbury Region	2.4784e+06	5.7456e+06	1	2661900	4	948	23	2
433006	57	514101	Auckland Harbourside	704	Hobson Ward	7	Auckland City	02	Auckland Region	2.66749e+06	6.48269e+06	1	433006	1	888	19	1
433700	93	514102	Auckland Central West	704	Hobson Ward	7	Auckland City	02	Auckland Region	2.6673e+06	6.48217e+06	1	433700	9	1100	42	3
3185700	51	612740	Fairfax	7305	Riverton Ward	73	Southland District	15	Southland Region	2.12732e+06	5.41905e+06	1	3185700	5	960	18	2
2136800	9	573101	Willis Street-Cambridge Terrace	4703	Lambton Ward	47	Wellington City	09	Wellington Region	2.65899e+06	5.9884e+06	1	2136800	8	1052	4	3
563600	102	518500	Three Kings	702	Avondale-Roskill Ward	7	Auckland City	02	Auckland Region	2.66663e+06	6.47577e+06	1	563600	10	1172	46	3
826602	135	521111	Paerata-Cape Hill	1003	Pukekohe Ward	10	Franklin District	02	Auckland Region	2.67877e+06	6.4448e+06	1	826602	3	931	45	1
2795700	33	599500	Seaview	6404	Timaru Ward	64	Timaru District	13	Canterbury Region	2.37075e+06	5.64392e+06	1	2795700	10	1145	15	3
2795400	9	599500	Seaview	6404	Timaru Ward	64	Timaru District	13	Canterbury Region	2.37084e+06	5.644e+06	1	2795400	10	1145	4	3
2795500	9	599500	Seaview	6404	Timaru Ward	64	Timaru District	13	Canterbury Region	2.37098e+06	5.64405e+06	1	2795500	10	1145	4	3
567401	99	518702	Hillsborough East	702	Avondale-Roskill Ward	7	Auckland City	02	Auckland Region	2.66749e+06	6.47536e+06	1	567401	3	924	33	1
2140900	60	573400	Mt Victoria West	4703	Lambton Ward	47	Wellington City	09	Wellington Region	2.65976e+06	5.98842e+06	1	2140900	4	952	21	2
435700	15	514102	Auckland Central West	704	Hobson Ward	7	Auckland City	02	Auckland Region	2.66731e+06	6.4812e+06	1	435700	5	958	5	2
567300	27	518600	Royal Oak	706	Tamaki-Maungakiekie Ward	7	Auckland City	02	Auckland Region	2.66849e+06	6.47531e+06	1	567300	2	911	9	1
2140600	99	573400	Mt Victoria West	4703	Lambton Ward	47	Wellington City	09	Wellington Region	2.65962e+06	5.98864e+06	1	2140600	6	997	35	2
436203	120	514103	Auckland Central East	704	Hobson Ward	7	Auckland City	02	Auckland Region	2.66755e+06	6.4813e+06	1	436203	10	1274	54	3
960200	90	527132	Hautapu	1703	Maungatautari Ward	17	Waipa District	03	Waikato Region	2.72635e+06	6.36722e+06	1	960200	3	928	30	1
436600	342	514103	Auckland Central East	704	Hobson Ward	7	Auckland City	02	Auckland Region	2.66777e+06	6.48168e+06	1	436600	10	1158	154	3
2664800	276	591800	Northcote	6001	Shirley-Papanui Ward	60	Christchurch City	13	Canterbury Region	2.47853e+06	5.74645e+06	1	2664800	5	968	97	2
2665100	102	591800	Northcote	6001	Shirley-Papanui Ward	60	Christchurch City	13	Canterbury Region	2.47838e+06	5.74714e+06	1	2665100	10	1223	46	3
2665200	60	591800	Northcote	6001	Shirley-Papanui Ward	60	Christchurch City	13	Canterbury Region	2.47854e+06	5.74712e+06	1	2665200	8	1060	27	3
304700	75	507900	Westlake	502	Central Ward	5	North Shore City	02	Auckland Region	2.66759e+06	6.48921e+06	1	304700	2	899	25	1
304500	60	507900	Westlake	502	Central Ward	5	North Shore City	02	Auckland Region	2.6674e+06	6.48921e+06	1	304500	5	973	21	2
2140100	90	573400	Mt Victoria West	4703	Lambton Ward	47	Wellington City	09	Wellington Region	2.65971e+06	5.98883e+06	1	2140100	5	956	31	2
436700	93	514103	Auckland Central East	704	Hobson Ward	7	Auckland City	02	Auckland Region	2.66789e+06	6.48169e+06	1	436700	10	1175	42	3
436900	942	514103	Auckland Central East	704	Hobson Ward	7	Auckland City	02	Auckland Region	2.66794e+06	6.48153e+06	1	436900	10	1265	424	3
567200	114	518600	Royal Oak	706	Tamaki-Maungakiekie Ward	7	Auckland City	02	Auckland Region	2.66822e+06	6.47528e+06	1	567200	2	911	38	1
566700	141	518600	Royal Oak	706	Tamaki-Maungakiekie Ward	7	Auckland City	02	Auckland Region	2.66828e+06	6.47576e+06	1	566700	3	934	47	1
566600	90	518600	Royal Oak	706	Tamaki-Maungakiekie Ward	7	Auckland City	02	Auckland Region	2.66836e+06	6.47595e+06	1	566600	3	934	30	1
2663900	102	591800	Northcote	6001	Shirley-Papanui Ward	60	Christchurch City	13	Canterbury Region	2.47909e+06	5.74655e+06	1	2663900	7	1019	36	2
2665300	117	591800	Northcote	6001	Shirley-Papanui Ward	60	Christchurch City	13	Canterbury Region	2.47874e+06	5.74713e+06	1	2665300	10	1223	53	3
172502	186	505802	Red Beach	403	Eastern Ward	4	Rodney District	02	Auckland Region	2.66192e+06	6.50962e+06	1	172502	4	941	65	2
435202	27	514102	Auckland Central West	704	Hobson Ward	7	Auckland City	02	Auckland Region	2.66745e+06	6.48153e+06	1	435202	1	894	9	1
303502	144	507900	Westlake	502	Central Ward	5	North Shore City	02	Auckland Region	2.66713e+06	6.48906e+06	1	303502	7	1002	50	2
434000	24	514102	Auckland Central West	704	Hobson Ward	7	Auckland City	02	Auckland Region	2.66774e+06	6.48201e+06	1	434000	1	894	8	1
2139400	105	573400	Mt Victoria West	4703	Lambton Ward	47	Wellington City	09	Wellington Region	2.65972e+06	5.98873e+06	1	2139400	5	971	37	2
435300	9	514102	Auckland Central West	704	Hobson Ward	7	Auckland City	02	Auckland Region	2.66739e+06	6.48148e+06	1	435300	5	958	3	2
435400	15	514102	Auckland Central West	704	Hobson Ward	7	Auckland City	02	Auckland Region	2.66729e+06	6.48134e+06	1	435400	5	958	5	2
2793900	57	599500	Seaview	6404	Timaru Ward	64	Timaru District	13	Canterbury Region	2.37027e+06	5.64423e+06	1	2793900	9	1092	26	3
434403	180	514102	Auckland Central West	704	Hobson Ward	7	Auckland City	02	Auckland Region	2.66712e+06	6.48171e+06	1	434403	7	1001	63	2
1482500	168	547900	Raureka	3005	Hastings Ward	30	Hastings District	06	Hawke's Bay Region	2.83878e+06	6.1658e+06	1	1482500	4	952	59	2
304200	9	507900	Westlake	502	Central Ward	5	North Shore City	02	Auckland Region	2.66797e+06	6.48822e+06	1	304200	5	968	3	2
433900	54	514102	Auckland Central West	704	Hobson Ward	7	Auckland City	02	Auckland Region	2.66767e+06	6.48208e+06	1	433900	1	894	18	1
2139100	33	573400	Mt Victoria West	4703	Lambton Ward	47	Wellington City	09	Wellington Region	2.65997e+06	5.98894e+06	1	2139100	3	933	11	1
435100	48	514102	Auckland Central West	704	Hobson Ward	7	Auckland City	02	Auckland Region	2.66727e+06	6.48145e+06	1	435100	10	1353	22	3
565100	207	518600	Royal Oak	702	Avondale-Roskill Ward	7	Auckland City	02	Auckland Region	2.66765e+06	6.47553e+06	1	565100	2	913	68	1
565300	102	518600	Royal Oak	702	Avondale-Roskill Ward	7	Auckland City	02	Auckland Region	2.66801e+06	6.47552e+06	1	565300	3	921	34	1
565400	162	518600	Royal Oak	702	Avondale-Roskill Ward	7	Auckland City	02	Auckland Region	2.66799e+06	6.47538e+06	1	565400	5	963	57	2
435201	99	514102	Auckland Central West	704	Hobson Ward	7	Auckland City	02	Auckland Region	2.66756e+06	6.48153e+06	1	435201	9	1109	45	3
434500	213	514102	Auckland Central West	704	Hobson Ward	7	Auckland City	02	Auckland Region	2.66725e+06	6.4818e+06	1	434500	10	1204	96	3
434601	57	514102	Auckland Central West	704	Hobson Ward	7	Auckland City	02	Auckland Region	2.6672e+06	6.48178e+06	1	434601	8	1059	26	3
959101	135	527501	Cambridge North	1703	Maungatautari Ward	17	Waipa District	03	Waikato Region	2.7288e+06	6.36589e+06	1	959101	1	888	45	1
565800	120	518600	Royal Oak	704	Hobson Ward	7	Auckland City	02	Auckland Region	2.66824e+06	6.47626e+06	1	565800	3	922	40	1
172601	144	505802	Red Beach	403	Eastern Ward	4	Rodney District	02	Auckland Region	2.6616e+06	6.5096e+06	1	172601	4	942	50	2
2794700	96	599500	Seaview	6404	Timaru Ward	64	Timaru District	13	Canterbury Region	2.37018e+06	5.64388e+06	1	2794700	7	1020	34	2
435000	189	514102	Auckland Central West	704	Hobson Ward	7	Auckland City	02	Auckland Region	2.66743e+06	6.48159e+06	1	435000	10	1353	85	3
3187902	9	612730	Te Waewae	7305	Riverton Ward	73	Southland District	15	Southland Region	2.12673e+06	5.41473e+06	1	3187902	6	980	3	2
2147700	114	573300	Mt Cook-Wallace Street	4703	Lambton Ward	47	Wellington City	09	Wellington Region	2.65848e+06	5.98739e+06	1	2147700	4	947	40	2
566400	117	518600	Royal Oak	704	Hobson Ward	7	Auckland City	02	Auckland Region	2.66843e+06	6.47622e+06	1	566400	7	1002	41	2
2139300	132	573400	Mt Victoria West	4703	Lambton Ward	47	Wellington City	09	Wellington Region	2.65984e+06	5.98883e+06	1	2139300	3	932	44	1
172802	282	505802	Red Beach	403	Eastern Ward	4	Rodney District	02	Auckland Region	2.66143e+06	6.50853e+06	1	172802	2	917	93	1
2138400	60	573400	Mt Victoria West	4703	Lambton Ward	47	Wellington City	09	Wellington Region	2.65984e+06	5.98904e+06	1	2138400	1	888	20	1
2137800	48	576600	Oriental Bay	4703	Lambton Ward	47	Wellington City	09	Wellington Region	2.66032e+06	5.98901e+06	1	2137800	1	885	16	1
696000	168	523401	Grange	802	Papatoetoe Ward	8	Manukau City	02	Auckland Region	2.67516e+06	6.46947e+06	1	696000	5	955	59	2
3187904	111	612802	Riverton West	7305	Riverton Ward	73	Southland District	15	Southland Region	2.12751e+06	5.41425e+06	1	3187904	8	1041	50	3
303600	198	507900	Westlake	502	Central Ward	5	North Shore City	02	Auckland Region	2.66721e+06	6.48883e+06	1	303600	5	968	69	2
434101	204	514102	Auckland Central West	704	Hobson Ward	7	Auckland City	02	Auckland Region	2.66734e+06	6.48204e+06	1	434101	9	1102	92	3
172703	141	505802	Red Beach	403	Eastern Ward	4	Rodney District	02	Auckland Region	2.66187e+06	6.50943e+06	1	172703	8	1049	63	3
171903	135	505805	Orewa	403	Eastern Ward	4	Rodney District	02	Auckland Region	2.66151e+06	6.51055e+06	1	171903	1	882	45	1
2138500	108	573400	Mt Victoria West	4703	Lambton Ward	47	Wellington City	09	Wellington Region	2.65987e+06	5.98897e+06	1	2138500	3	930	36	1
434602	228	514102	Auckland Central West	704	Hobson Ward	7	Auckland City	02	Auckland Region	2.66724e+06	6.48171e+06	1	434602	8	1059	103	3
434802	81	514102	Auckland Central West	704	Hobson Ward	7	Auckland City	02	Auckland Region	2.66725e+06	6.48159e+06	1	434802	9	1130	36	3
565200	147	518600	Royal Oak	702	Avondale-Roskill Ward	7	Auckland City	02	Auckland Region	2.66782e+06	6.47551e+06	1	565200	4	952	51	2
2793800	114	599500	Seaview	6404	Timaru Ward	64	Timaru District	13	Canterbury Region	2.37003e+06	5.64426e+06	1	2793800	9	1095	51	3
434200	126	514102	Auckland Central West	704	Hobson Ward	7	Auckland City	02	Auckland Region	2.66746e+06	6.48192e+06	1	434200	9	1109	57	3
172201	252	505805	Orewa	403	Eastern Ward	4	Rodney District	02	Auckland Region	2.66227e+06	6.5109e+06	1	172201	9	1089	113	3
434801	66	514102	Auckland Central West	704	Hobson Ward	7	Auckland City	02	Auckland Region	2.66731e+06	6.48164e+06	1	434801	9	1130	30	3
172202	153	505805	Orewa	403	Eastern Ward	4	Rodney District	02	Auckland Region	2.66218e+06	6.51076e+06	1	172202	7	1008	54	2
2138000	84	576600	Oriental Bay	4703	Lambton Ward	47	Wellington City	09	Wellington Region	2.66004e+06	5.98896e+06	1	2138000	7	1006	29	2
2138100	120	576600	Oriental Bay	4703	Lambton Ward	47	Wellington City	09	Wellington Region	2.66012e+06	5.98901e+06	1	2138100	2	902	40	1
434701	123	514102	Auckland Central West	704	Hobson Ward	7	Auckland City	02	Auckland Region	2.66733e+06	6.48173e+06	1	434701	9	1130	55	3
172100	441	505805	Orewa	403	Eastern Ward	4	Rodney District	02	Auckland Region	2.66216e+06	6.51122e+06	1	172100	7	1021	154	2
2793600	6	599500	Seaview	6404	Timaru Ward	64	Timaru District	13	Canterbury Region	2.37107e+06	5.64404e+06	1	2793600	8	1061	3	3
172605	96	505802	Red Beach	403	Eastern Ward	4	Rodney District	02	Auckland Region	2.66144e+06	6.50908e+06	1	172605	3	927	32	1
171802	297	505805	Orewa	403	Eastern Ward	4	Rodney District	02	Auckland Region	2.66171e+06	6.51099e+06	1	171802	7	1010	104	2
565000	180	518600	Royal Oak	702	Avondale-Roskill Ward	7	Auckland City	02	Auckland Region	2.66807e+06	6.47569e+06	1	565000	3	919	59	1
435203	258	514102	Auckland Central West	704	Hobson Ward	7	Auckland City	02	Auckland Region	2.66741e+06	6.48132e+06	1	435203	9	1131	116	3
172300	177	505805	Orewa	403	Eastern Ward	4	Rodney District	02	Auckland Region	2.66213e+06	6.51043e+06	1	172300	7	1025	62	2
2137900	171	576600	Oriental Bay	4703	Lambton Ward	47	Wellington City	09	Wellington Region	2.65998e+06	5.98907e+06	1	2137900	3	921	56	1
434102	1431	514102	Auckland Central West	704	Hobson Ward	7	Auckland City	02	Auckland Region	2.66732e+06	6.48193e+06	1	434102	10	1189	644	3
434702	96	514102	Auckland Central West	704	Hobson Ward	7	Auckland City	02	Auckland Region	2.66731e+06	6.48174e+06	1	434702	9	1130	43	3
959104	147	527501	Cambridge North	1703	Maungatautari Ward	17	Waipa District	03	Waikato Region	2.72898e+06	6.36589e+06	1	959104	1	878	49	1
959102	84	527501	Cambridge North	1703	Maungatautari Ward	17	Waipa District	03	Waikato Region	2.72878e+06	6.36618e+06	1	959102	1	874	28	1
172501	108	505802	Red Beach	403	Eastern Ward	4	Rodney District	02	Auckland Region	2.66177e+06	6.5097e+06	1	172501	4	942	38	2
438214	261	514101	Auckland Harbourside	704	Hobson Ward	7	Auckland City	02	Auckland Region	2.6689e+06	6.48228e+06	1	438214	6	982	91	2
3190800	18	612801	Riverton East	7305	Riverton Ward	73	Southland District	15	Southland Region	2.12632e+06	5.417e+06	1	3190800	9	1089	8	3
3190700	72	612801	Riverton East	7305	Riverton Ward	73	Southland District	15	Southland Region	2.12665e+06	5.41724e+06	1	3190700	8	1035	32	3
3190600	36	612801	Riverton East	7305	Riverton Ward	73	Southland District	15	Southland Region	2.12656e+06	5.41727e+06	1	3190600	8	1035	16	3
2142300	75	573400	Mt Victoria West	4703	Lambton Ward	47	Wellington City	09	Wellington Region	2.65963e+06	5.98815e+06	1	2142300	5	956	26	2
2142600	99	573400	Mt Victoria West	4703	Lambton Ward	47	Wellington City	09	Wellington Region	2.65944e+06	5.98814e+06	1	2142600	5	962	35	2
2141600	81	573400	Mt Victoria West	4703	Lambton Ward	47	Wellington City	09	Wellington Region	2.65964e+06	5.9884e+06	1	2141600	5	957	28	2
176502	411	505802	Red Beach	403	Eastern Ward	4	Rodney District	02	Auckland Region	2.66106e+06	6.50886e+06	1	176502	1	878	136	1
1487000	219	547700	St Leonards	3005	Hastings Ward	30	Hastings District	06	Hawke's Bay Region	2.83879e+06	6.16714e+06	1	1487000	7	1005	77	2
1486000	99	547700	St Leonards	3005	Hastings Ward	30	Hastings District	06	Hawke's Bay Region	2.83895e+06	6.16782e+06	1	1486000	9	1078	45	3
1486300	153	547700	St Leonards	3005	Hastings Ward	30	Hastings District	06	Hawke's Bay Region	2.83946e+06	6.16785e+06	1	1486300	6	989	54	2
1486100	99	547700	St Leonards	3005	Hastings Ward	30	Hastings District	06	Hawke's Bay Region	2.83916e+06	6.16789e+06	1	1486100	10	1300	45	3
962500	186	527501	Cambridge North	1702	Cambridge Ward	17	Waipa District	03	Waikato Region	2.72718e+06	6.36564e+06	1	962500	3	927	61	1
961600	156	527501	Cambridge North	1702	Cambridge Ward	17	Waipa District	03	Waikato Region	2.72773e+06	6.36562e+06	1	961600	2	912	51	1
961500	147	527501	Cambridge North	1702	Cambridge Ward	17	Waipa District	03	Waikato Region	2.72751e+06	6.3656e+06	1	961500	5	960	51	2
962000	69	527503	Cambridge Central	1702	Cambridge Ward	17	Waipa District	03	Waikato Region	2.72832e+06	6.36566e+06	1	962000	6	977	24	2
2667000	102	592000	Aorangi	6001	Shirley-Papanui Ward	60	Christchurch City	13	Canterbury Region	2.4772e+06	5.74613e+06	1	2667000	4	936	36	2
2665400	165	591800	Northcote	6001	Shirley-Papanui Ward	60	Christchurch City	13	Canterbury Region	2.47889e+06	5.74705e+06	1	2665400	8	1060	74	3
438103	18	514101	Auckland Harbourside	704	Hobson Ward	7	Auckland City	02	Auckland Region	2.6682e+06	6.4826e+06	1	438103	8	1060	8	3
438408	327	514103	Auckland Central East	704	Hobson Ward	7	Auckland City	02	Auckland Region	2.66851e+06	6.48212e+06	1	438408	7	1030	114	2
3189800	102	612802	Riverton West	7305	Riverton Ward	73	Southland District	15	Southland Region	2.12574e+06	5.41633e+06	1	3189800	6	996	36	2
3191100	18	612801	Riverton East	7305	Riverton Ward	73	Southland District	15	Southland Region	2.12619e+06	5.41672e+06	1	3191100	9	1089	8	3
3189700	90	612802	Riverton West	7305	Riverton Ward	73	Southland District	15	Southland Region	2.12545e+06	5.41644e+06	1	3189700	4	937	31	2
2142200	72	573400	Mt Victoria West	4703	Lambton Ward	47	Wellington City	09	Wellington Region	2.65959e+06	5.98806e+06	1	2142200	5	956	25	2
2142700	21	573400	Mt Victoria West	4703	Lambton Ward	47	Wellington City	09	Wellington Region	2.65945e+06	5.98806e+06	1	2142700	5	962	7	2
1486400	72	547700	St Leonards	3005	Hastings Ward	30	Hastings District	06	Hawke's Bay Region	2.8393e+06	6.16773e+06	1	1486400	8	1067	32	3
1486600	15	547700	St Leonards	3005	Hastings Ward	30	Hastings District	06	Hawke's Bay Region	2.83873e+06	6.16775e+06	1	1486600	7	1008	5	2
438210	3	514101	Auckland Harbourside	704	Hobson Ward	7	Auckland City	02	Auckland Region	2.6686e+06	6.48262e+06	1	438210	6	982	1	2
438213	150	514101	Auckland Harbourside	704	Hobson Ward	7	Auckland City	02	Auckland Region	2.66846e+06	6.48248e+06	1	438213	5	956	52	2
438203	30	514103	Auckland Central East	704	Hobson Ward	7	Auckland City	02	Auckland Region	2.66862e+06	6.4819e+06	1	438203	8	1059	14	3
2666500	84	592000	Aorangi	6001	Shirley-Papanui Ward	60	Christchurch City	13	Canterbury Region	2.47727e+06	5.74575e+06	1	2666500	5	968	29	2
436400	291	514103	Auckland Central East	704	Hobson Ward	7	Auckland City	02	Auckland Region	2.66752e+06	6.4812e+06	1	436400	9	1132	131	3
436202	138	514103	Auckland Central East	704	Hobson Ward	7	Auckland City	02	Auckland Region	2.66762e+06	6.48133e+06	1	436202	10	1184	62	3
2140500	120	573400	Mt Victoria West	4703	Lambton Ward	47	Wellington City	09	Wellington Region	2.65957e+06	5.98853e+06	1	2140500	5	972	42	2
2141001	114	573400	Mt Victoria West	4703	Lambton Ward	47	Wellington City	09	Wellington Region	2.65982e+06	5.98851e+06	1	2141001	4	952	40	2
2139900	123	573400	Mt Victoria West	4703	Lambton Ward	47	Wellington City	09	Wellington Region	2.65954e+06	5.98876e+06	1	2139900	6	980	43	2
567100	87	518600	Royal Oak	706	Tamaki-Maungakiekie Ward	7	Auckland City	02	Auckland Region	2.66825e+06	6.47538e+06	1	567100	4	938	30	2
2139700	126	573400	Mt Victoria West	4703	Lambton Ward	47	Wellington City	09	Wellington Region	2.65941e+06	5.98869e+06	1	2139700	6	997	44	2
961300	132	527501	Cambridge North	1702	Cambridge Ward	17	Waipa District	03	Waikato Region	2.72793e+06	6.36609e+06	1	961300	6	991	46	2
961200	129	527501	Cambridge North	1702	Cambridge Ward	17	Waipa District	03	Waikato Region	2.72772e+06	6.36608e+06	1	961200	4	940	45	2
961400	234	527501	Cambridge North	1702	Cambridge Ward	17	Waipa District	03	Waikato Region	2.72828e+06	6.36609e+06	1	961400	4	946	82	2
961100	195	527501	Cambridge North	1702	Cambridge Ward	17	Waipa District	03	Waikato Region	2.72749e+06	6.366e+06	1	961100	5	954	68	2
437102	123	514103	Auckland Central East	704	Hobson Ward	7	Auckland City	02	Auckland Region	2.66789e+06	6.48199e+06	1	437102	8	1044	55	3
2664100	210	591800	Northcote	6001	Shirley-Papanui Ward	60	Christchurch City	13	Canterbury Region	2.47891e+06	5.74624e+06	1	2664100	7	1000	74	2
2664400	108	591800	Northcote	6001	Shirley-Papanui Ward	60	Christchurch City	13	Canterbury Region	2.47861e+06	5.74588e+06	1	2664400	8	1068	49	3
2664900	87	591800	Northcote	6001	Shirley-Papanui Ward	60	Christchurch City	13	Canterbury Region	2.47872e+06	5.74631e+06	1	2664900	6	984	30	2
2664700	282	591800	Northcote	6001	Shirley-Papanui Ward	60	Christchurch City	13	Canterbury Region	2.47829e+06	5.74665e+06	1	2664700	3	935	93	1
435600	282	514102	Auckland Central West	704	Hobson Ward	7	Auckland City	02	Auckland Region	2.66713e+06	6.48121e+06	1	435600	6	988	99	2
437101	42	514103	Auckland Central East	704	Hobson Ward	7	Auckland City	02	Auckland Region	2.66782e+06	6.48201e+06	1	437101	8	1044	19	3
2663800	3	591900	Papanui	6001	Shirley-Papanui Ward	60	Christchurch City	13	Canterbury Region	2.47826e+06	5.74569e+06	1	2663800	6	984	1	2
566800	267	518600	Royal Oak	706	Tamaki-Maungakiekie Ward	7	Auckland City	02	Auckland Region	2.66844e+06	6.47576e+06	1	566800	2	902	88	1
2795900	24	599500	Seaview	6404	Timaru Ward	64	Timaru District	13	Canterbury Region	2.37104e+06	5.64387e+06	1	2795900	10	1145	11	3
2795600	3	599500	Seaview	6404	Timaru Ward	64	Timaru District	13	Canterbury Region	2.37064e+06	5.64387e+06	1	2795600	10	1145	1	3
2795800	15	599500	Seaview	6404	Timaru Ward	64	Timaru District	13	Canterbury Region	2.37089e+06	5.64384e+06	1	2795800	10	1145	7	3
305202	3	507900	Westlake	502	Central Ward	5	North Shore City	02	Auckland Region	2.66694e+06	6.48934e+06	1	305202	2	916	1	1
2148100	48	576500	Adelaide	4703	Lambton Ward	47	Wellington City	09	Wellington Region	2.65902e+06	5.98779e+06	1	2148100	6	985	17	2
2140200	138	573400	Mt Victoria West	4703	Lambton Ward	47	Wellington City	09	Wellington Region	2.65962e+06	5.98886e+06	1	2140200	6	992	48	2
436300	315	514103	Auckland Central East	704	Hobson Ward	7	Auckland City	02	Auckland Region	2.66773e+06	6.48131e+06	1	436300	10	1202	142	3
436001	93	514102	Auckland Central West	701	Western Bays Ward	7	Auckland City	02	Auckland Region	2.6669e+06	6.48114e+06	1	436001	8	1062	42	3
2664200	90	591800	Northcote	6001	Shirley-Papanui Ward	60	Christchurch City	13	Canterbury Region	2.47879e+06	5.74609e+06	1	2664200	7	1019	31	2
437000	369	514103	Auckland Central East	704	Hobson Ward	7	Auckland City	02	Auckland Region	2.66784e+06	6.48143e+06	1	437000	10	1286	166	3
304600	129	507900	Westlake	502	Central Ward	5	North Shore City	02	Auckland Region	2.66743e+06	6.48907e+06	1	304600	5	973	45	2
2140700	126	573400	Mt Victoria West	4703	Lambton Ward	47	Wellington City	09	Wellington Region	2.65973e+06	5.98859e+06	1	2140700	5	961	44	2
2140400	78	573400	Mt Victoria West	4703	Lambton Ward	47	Wellington City	09	Wellington Region	2.6595e+06	5.9886e+06	1	2140400	8	1032	35	3
2140300	60	573400	Mt Victoria West	4703	Lambton Ward	47	Wellington City	09	Wellington Region	2.65938e+06	5.98859e+06	1	2140300	8	1032	27	3
2664300	132	591800	Northcote	6001	Shirley-Papanui Ward	60	Christchurch City	13	Canterbury Region	2.47872e+06	5.74593e+06	1	2664300	5	955	46	2
2664000	165	591800	Northcote	6001	Shirley-Papanui Ward	60	Christchurch City	13	Canterbury Region	2.47902e+06	5.74639e+06	1	2664000	6	986	58	2
2665000	24	591800	Northcote	6001	Shirley-Papanui Ward	60	Christchurch City	13	Canterbury Region	2.47847e+06	5.74619e+06	1	2665000	6	984	8	2
436500	33	514103	Auckland Central East	704	Hobson Ward	7	Auckland City	02	Auckland Region	2.66763e+06	6.48116e+06	1	436500	9	1132	15	3
2794900	3	599500	Seaview	6404	Timaru Ward	64	Timaru District	13	Canterbury Region	2.37051e+06	5.64427e+06	1	2794900	10	1145	1	3
436801	138	514103	Auckland Central East	704	Hobson Ward	7	Auckland City	02	Auckland Region	2.66778e+06	6.4815e+06	1	436801	10	1296	62	3
2140800	129	573400	Mt Victoria West	4703	Lambton Ward	47	Wellington City	09	Wellington Region	2.65968e+06	5.98848e+06	1	2140800	6	995	45	2
2139500	87	573400	Mt Victoria West	4703	Lambton Ward	47	Wellington City	09	Wellington Region	2.65978e+06	5.98868e+06	1	2139500	5	961	30	2
2140002	123	573400	Mt Victoria West	4703	Lambton Ward	47	Wellington City	09	Wellington Region	2.65966e+06	5.98873e+06	1	2140002	7	1019	43	2
960001	195	527132	Hautapu	1703	Maungatautari Ward	17	Waipa District	03	Waikato Region	2.72513e+06	6.3659e+06	1	960001	4	939	68	2
959900	243	527132	Hautapu	1703	Maungatautari Ward	17	Waipa District	03	Waikato Region	2.72363e+06	6.36637e+06	1	959900	3	924	80	1
436802	408	514103	Auckland Central East	704	Hobson Ward	7	Auckland City	02	Auckland Region	2.66785e+06	6.48151e+06	1	436802	10	1222	184	3
436100	12	514103	Auckland Central East	704	Hobson Ward	7	Auckland City	02	Auckland Region	2.66767e+06	6.48151e+06	1	436100	8	1059	5	3
2664500	72	591800	Northcote	6001	Shirley-Papanui Ward	60	Christchurch City	13	Canterbury Region	2.47839e+06	5.74676e+06	1	2664500	7	1010	25	2
2664600	111	591800	Northcote	6001	Shirley-Papanui Ward	60	Christchurch City	13	Canterbury Region	2.47877e+06	5.74658e+06	1	2664600	7	1010	39	2
2795300	3	599500	Seaview	6404	Timaru Ward	64	Timaru District	13	Canterbury Region	2.37077e+06	5.64414e+06	1	2795300	10	1145	1	3
2795100	12	599500	Seaview	6404	Timaru Ward	64	Timaru District	13	Canterbury Region	2.37052e+06	5.64407e+06	1	2795100	10	1145	5	3
567000	138	518600	Royal Oak	706	Tamaki-Maungakiekie Ward	7	Auckland City	02	Auckland Region	2.66829e+06	6.47548e+06	1	567000	4	938	48	2
435801	15	514102	Auckland Central West	704	Hobson Ward	7	Auckland City	02	Auckland Region	2.66736e+06	6.48123e+06	1	435801	5	958	5	2
2139800	126	573400	Mt Victoria West	4703	Lambton Ward	47	Wellington City	09	Wellington Region	2.65953e+06	5.98868e+06	1	2139800	5	960	44	2
566900	159	518600	Royal Oak	706	Tamaki-Maungakiekie Ward	7	Auckland City	02	Auckland Region	2.66835e+06	6.4756e+06	1	566900	2	915	52	1
567600	192	518702	Hillsborough East	702	Avondale-Roskill Ward	7	Auckland City	02	Auckland Region	2.66786e+06	6.47524e+06	1	567600	4	947	67	2
960002	114	527502	Cambridge West	1703	Maungatautari Ward	17	Waipa District	03	Waikato Region	2.72588e+06	6.36535e+06	1	960002	6	988	40	2
435900	120	514102	Auckland Central West	704	Hobson Ward	7	Auckland City	02	Auckland Region	2.66748e+06	6.48132e+06	1	435900	5	958	42	2
436201	240	514103	Auckland Central East	704	Hobson Ward	7	Auckland City	02	Auckland Region	2.66758e+06	6.48136e+06	1	436201	10	1193	108	3
435802	378	514102	Auckland Central West	704	Hobson Ward	7	Auckland City	02	Auckland Region	2.66744e+06	6.48122e+06	1	435802	10	1230	170	3
1489200	90	548200	Hastings Central	3005	Hastings Ward	30	Hastings District	06	Hawke's Bay Region	2.83917e+06	6.16647e+06	1	1489200	5	957	31	2
1487700	114	547700	St Leonards	3005	Hastings Ward	30	Hastings District	06	Hawke's Bay Region	2.83914e+06	6.16708e+06	1	1487700	9	1116	51	3
963500	162	527502	Cambridge West	1702	Cambridge Ward	17	Waipa District	03	Waikato Region	2.72634e+06	6.36555e+06	1	963500	4	948	57	2
963800	87	527502	Cambridge West	1702	Cambridge Ward	17	Waipa District	03	Waikato Region	2.72694e+06	6.36558e+06	1	963800	3	933	29	1
963600	144	527502	Cambridge West	1702	Cambridge Ward	17	Waipa District	03	Waikato Region	2.72658e+06	6.36556e+06	1	963600	4	949	50	2
2668502	9	592000	Aorangi	6002	Fendalton-Waimairi Ward	60	Christchurch City	13	Canterbury Region	2.47646e+06	5.74507e+06	1	2668502	6	990	3	2
2170300	42	576400	Newtown East	4705	Southern Ward	47	Wellington City	09	Wellington Region	2.65914e+06	5.98612e+06	1	2170300	6	984	15	2
2170400	129	576400	Newtown East	4705	Southern Ward	47	Wellington City	09	Wellington Region	2.65926e+06	5.9862e+06	1	2170400	10	1149	58	3
2142900	6	573400	Mt Victoria West	4703	Lambton Ward	47	Wellington City	09	Wellington Region	2.65925e+06	5.98808e+06	1	2142900	8	1064	3	3
440300	3	514301	Grafton West	704	Hobson Ward	7	Auckland City	02	Auckland Region	2.66837e+06	6.48155e+06	1	440300	10	1309	1	3
1487500	174	547700	St Leonards	3005	Hastings Ward	30	Hastings District	06	Hawke's Bay Region	2.83888e+06	6.16701e+06	1	1487500	6	997	61	2
440600	270	514301	Grafton West	704	Hobson Ward	7	Auckland City	02	Auckland Region	2.66794e+06	6.48132e+06	1	440600	9	1098	122	3
1488400	111	547700	St Leonards	3005	Hastings Ward	30	Hastings District	06	Hawke's Bay Region	2.83968e+06	6.1677e+06	1	1488400	6	976	39	2
964000	123	527502	Cambridge West	1702	Cambridge Ward	17	Waipa District	03	Waikato Region	2.72634e+06	6.3653e+06	1	964000	8	1064	55	3
963700	99	527502	Cambridge West	1702	Cambridge Ward	17	Waipa District	03	Waikato Region	2.72658e+06	6.3653e+06	1	963700	3	933	33	1
964400	117	527502	Cambridge West	1702	Cambridge Ward	17	Waipa District	03	Waikato Region	2.72705e+06	6.36506e+06	1	964400	9	1082	53	3
2667500	147	592000	Aorangi	6002	Fendalton-Waimairi Ward	60	Christchurch City	13	Canterbury Region	2.47694e+06	5.74538e+06	1	2667500	3	930	49	1
2798900	63	599700	Parkside	6404	Timaru Ward	64	Timaru District	13	Canterbury Region	2.37034e+06	5.64371e+06	1	2798900	10	1153	28	3
2798800	81	599700	Parkside	6404	Timaru Ward	64	Timaru District	13	Canterbury Region	2.37017e+06	5.64364e+06	1	2798800	6	979	28	2
2799300	15	599700	Parkside	6404	Timaru Ward	64	Timaru District	13	Canterbury Region	2.37102e+06	5.6437e+06	1	2799300	8	1071	7	3
2799200	63	599700	Parkside	6404	Timaru Ward	64	Timaru District	13	Canterbury Region	2.37067e+06	5.6437e+06	1	2799200	10	1145	28	3
438301	18	514103	Auckland Central East	704	Hobson Ward	7	Auckland City	02	Auckland Region	2.66844e+06	6.48238e+06	1	438301	8	1059	8	3
3190100	120	612802	Riverton West	7305	Riverton Ward	73	Southland District	15	Southland Region	2.12658e+06	5.41588e+06	1	3190100	3	919	40	1
3190000	162	612802	Riverton West	7305	Riverton Ward	73	Southland District	15	Southland Region	2.12613e+06	5.41594e+06	1	3190000	4	938	57	2
438209	243	514101	Auckland Harbourside	704	Hobson Ward	7	Auckland City	02	Auckland Region	2.66783e+06	6.48298e+06	1	438209	6	982	85	2
438501	39	514103	Auckland Central East	704	Hobson Ward	7	Auckland City	02	Auckland Region	2.6683e+06	6.48225e+06	1	438501	7	1022	14	2
175400	18	506000	Silverdale South	403	Eastern Ward	4	Rodney District	02	Auckland Region	2.66042e+06	6.50801e+06	1	175400	6	978	6	2
438107	276	514103	Auckland Central East	704	Hobson Ward	7	Auckland City	02	Auckland Region	2.66828e+06	6.48244e+06	1	438107	8	1031	124	3
1486800	201	547700	St Leonards	3005	Hastings Ward	30	Hastings District	06	Hawke's Bay Region	2.83879e+06	6.16741e+06	1	1486800	7	1014	70	2
1487300	108	547700	St Leonards	3005	Hastings Ward	30	Hastings District	06	Hawke's Bay Region	2.83918e+06	6.16761e+06	1	1487300	6	990	38	2
438600	144	514103	Auckland Central East	704	Hobson Ward	7	Auckland City	02	Auckland Region	2.6684e+06	6.48212e+06	1	438600	5	973	50	2
2665600	138	591800	Northcote	6001	Shirley-Papanui Ward	60	Christchurch City	13	Canterbury Region	2.4786e+06	5.74692e+06	1	2665600	7	1029	48	2
437600	147	514103	Auckland Central East	704	Hobson Ward	7	Auckland City	02	Auckland Region	2.66791e+06	6.48228e+06	1	437600	9	1095	66	3
438305	303	514103	Auckland Central East	704	Hobson Ward	7	Auckland City	02	Auckland Region	2.66859e+06	6.48203e+06	1	438305	10	1298	136	3
3190201	87	612802	Riverton West	7305	Riverton Ward	73	Southland District	15	Southland Region	2.12624e+06	5.41538e+06	1	3190201	5	959	30	2
2141900	78	573400	Mt Victoria West	4703	Lambton Ward	47	Wellington City	09	Wellington Region	2.65971e+06	5.98827e+06	1	2141900	3	930	26	1
438404	102	514103	Auckland Central East	704	Hobson Ward	7	Auckland City	02	Auckland Region	2.66834e+06	6.48243e+06	1	438404	5	973	36	2
1486900	18	547700	St Leonards	3005	Hastings Ward	30	Hastings District	06	Hawke's Bay Region	2.83886e+06	6.16741e+06	1	1486900	7	1014	6	2
1487100	93	547700	St Leonards	3005	Hastings Ward	30	Hastings District	06	Hawke's Bay Region	2.83894e+06	6.16734e+06	1	1487100	4	953	33	2
962200	294	527501	Cambridge North	1702	Cambridge Ward	17	Waipa District	03	Waikato Region	2.72713e+06	6.36606e+06	1	962200	4	939	103	2
3190500	66	612801	Riverton East	7305	Riverton Ward	73	Southland District	15	Southland Region	2.12696e+06	5.41765e+06	1	3190500	8	1035	30	3
3190400	12	612801	Riverton East	7305	Riverton Ward	73	Southland District	15	Southland Region	2.12667e+06	5.41769e+06	1	3190400	9	1089	5	3
2141400	93	573400	Mt Victoria West	4703	Lambton Ward	47	Wellington City	09	Wellington Region	2.65955e+06	5.98844e+06	1	2141400	7	1000	33	2
437700	240	514103	Auckland Central East	704	Hobson Ward	7	Auckland City	02	Auckland Region	2.66798e+06	6.48226e+06	1	437700	7	1026	84	2
437200	3	514103	Auckland Central East	704	Hobson Ward	7	Auckland City	02	Auckland Region	2.66813e+06	6.48205e+06	1	437200	8	1044	1	3
1486200	156	547700	St Leonards	3005	Hastings Ward	30	Hastings District	06	Hawke's Bay Region	2.83933e+06	6.16799e+06	1	1486200	10	1181	70	3
1487200	93	547700	St Leonards	3005	Hastings Ward	30	Hastings District	06	Hawke's Bay Region	2.83909e+06	6.16729e+06	1	1487200	4	953	33	2
1485900	78	547700	St Leonards	3005	Hastings Ward	30	Hastings District	06	Hawke's Bay Region	2.83903e+06	6.16802e+06	1	1485900	8	1067	35	3
962100	132	527501	Cambridge North	1702	Cambridge Ward	17	Waipa District	03	Waikato Region	2.72772e+06	6.36586e+06	1	962100	6	977	46	2
961900	177	527501	Cambridge North	1702	Cambridge Ward	17	Waipa District	03	Waikato Region	2.72839e+06	6.36586e+06	1	961900	6	980	62	2
961800	180	527501	Cambridge North	1702	Cambridge Ward	17	Waipa District	03	Waikato Region	2.72817e+06	6.36585e+06	1	961800	7	1003	63	2
962400	138	527501	Cambridge North	1702	Cambridge Ward	17	Waipa District	03	Waikato Region	2.72728e+06	6.36584e+06	1	962400	5	959	48	2
962300	129	527501	Cambridge North	1702	Cambridge Ward	17	Waipa District	03	Waikato Region	2.72706e+06	6.36583e+06	1	962300	8	1042	58	3
175600	39	506000	Silverdale South	403	Eastern Ward	4	Rodney District	02	Auckland Region	2.66026e+06	6.50748e+06	1	175600	4	941	14	2
3191300	156	612801	Riverton East	7305	Riverton Ward	73	Southland District	15	Southland Region	2.12647e+06	5.41669e+06	1	3191300	9	1073	70	3
3190900	18	612801	Riverton East	7305	Riverton Ward	73	Southland District	15	Southland Region	2.12637e+06	5.41695e+06	1	3190900	9	1089	8	3
3191000	6	612801	Riverton East	7305	Riverton Ward	73	Southland District	15	Southland Region	2.12618e+06	5.41683e+06	1	3191000	9	1089	3	3
2142100	108	573400	Mt Victoria West	4703	Lambton Ward	47	Wellington City	09	Wellington Region	2.65951e+06	5.98807e+06	1	2142100	7	1000	38	2
2141500	114	573400	Mt Victoria West	4703	Lambton Ward	47	Wellington City	09	Wellington Region	2.65951e+06	5.98836e+06	1	2141500	7	1000	40	2
438503	180	514103	Auckland Central East	704	Hobson Ward	7	Auckland City	02	Auckland Region	2.66832e+06	6.48214e+06	1	438503	7	1022	63	2
438302	18	514103	Auckland Central East	704	Hobson Ward	7	Auckland City	02	Auckland Region	2.66858e+06	6.48223e+06	1	438302	8	1059	8	3
438106	3	514103	Auckland Central East	704	Hobson Ward	7	Auckland City	02	Auckland Region	2.66813e+06	6.48239e+06	1	438106	8	1031	1	3
962601	177	527503	Cambridge Central	1702	Cambridge Ward	17	Waipa District	03	Waikato Region	2.72722e+06	6.36546e+06	1	962601	7	1025	62	2
963100	66	527503	Cambridge Central	1702	Cambridge Ward	17	Waipa District	03	Waikato Region	2.72793e+06	6.36494e+06	1	963100	9	1099	30	3
2666400	60	592000	Aorangi	6001	Shirley-Papanui Ward	60	Christchurch City	13	Canterbury Region	2.47726e+06	5.74585e+06	1	2666400	5	968	21	2
438303	78	514103	Auckland Central East	704	Hobson Ward	7	Auckland City	02	Auckland Region	2.66852e+06	6.48223e+06	1	438303	8	1059	35	3
438402	183	514103	Auckland Central East	704	Hobson Ward	7	Auckland City	02	Auckland Region	2.6684e+06	6.48233e+06	1	438402	9	1082	82	3
437900	159	514101	Auckland Harbourside	704	Hobson Ward	7	Auckland City	02	Auckland Region	2.66804e+06	6.48264e+06	1	437900	8	1064	72	3
438215	36	514101	Auckland Harbourside	704	Hobson Ward	7	Auckland City	02	Auckland Region	2.66871e+06	6.48226e+06	1	438215	5	956	13	2
438207	384	514101	Auckland Harbourside	704	Hobson Ward	7	Auckland City	02	Auckland Region	2.66926e+06	6.4821e+06	1	438207	5	956	134	2
3189900	63	612802	Riverton West	7305	Riverton Ward	73	Southland District	15	Southland Region	2.12582e+06	5.41596e+06	1	3189900	4	937	22	2
2141800	93	573400	Mt Victoria West	4703	Lambton Ward	47	Wellington City	09	Wellington Region	2.65974e+06	5.98835e+06	1	2141800	3	930	31	1
2141700	123	573400	Mt Victoria West	4703	Lambton Ward	47	Wellington City	09	Wellington Region	2.65961e+06	5.98832e+06	1	2141700	5	957	43	2
438000	108	514103	Auckland Central East	704	Hobson Ward	7	Auckland City	02	Auckland Region	2.66798e+06	6.48251e+06	1	438000	8	1060	49	3
438206	156	514101	Auckland Harbourside	704	Hobson Ward	7	Auckland City	02	Auckland Region	2.66886e+06	6.48205e+06	1	438206	4	953	55	2
1486500	39	547700	St Leonards	3005	Hastings Ward	30	Hastings District	06	Hawke's Bay Region	2.83866e+06	6.16754e+06	1	1486500	7	1008	14	2
1486700	93	547700	St Leonards	3005	Hastings Ward	30	Hastings District	06	Hawke's Bay Region	2.83879e+06	6.16766e+06	1	1486700	7	1008	33	2
1487400	84	547700	St Leonards	3005	Hastings Ward	30	Hastings District	06	Hawke's Bay Region	2.8391e+06	6.16771e+06	1	1487400	6	990	29	2
962900	33	527503	Cambridge Central	1702	Cambridge Ward	17	Waipa District	03	Waikato Region	2.72753e+06	6.36488e+06	1	962900	9	1099	15	3
962700	3	527503	Cambridge Central	1702	Cambridge Ward	17	Waipa District	03	Waikato Region	2.72732e+06	6.36485e+06	1	962700	9	1099	1	3
438407	369	514103	Auckland Central East	704	Hobson Ward	7	Auckland City	02	Auckland Region	2.66845e+06	6.4822e+06	1	438407	10	1154	166	3
2665500	177	591800	Northcote	6001	Shirley-Papanui Ward	60	Christchurch City	13	Canterbury Region	2.47848e+06	5.747e+06	1	2665500	10	1144	80	3
438204	3	514101	Auckland Harbourside	704	Hobson Ward	7	Auckland City	02	Auckland Region	2.6695e+06	6.48227e+06	1	438204	5	956	1	2
2141100	81	573400	Mt Victoria West	4703	Lambton Ward	47	Wellington City	09	Wellington Region	2.65937e+06	5.98853e+06	1	2141100	8	1032	36	3
438102	3	514103	Auckland Central East	704	Hobson Ward	7	Auckland City	02	Auckland Region	2.66795e+06	6.48243e+06	1	438102	8	1060	1	3
962800	3	527503	Cambridge Central	1702	Cambridge Ward	17	Waipa District	03	Waikato Region	2.72737e+06	6.36469e+06	1	962800	9	1099	1	3
963000	30	527503	Cambridge Central	1702	Cambridge Ward	17	Waipa District	03	Waikato Region	2.72751e+06	6.36467e+06	1	963000	9	1099	14	3
437800	144	514103	Auckland Central East	704	Hobson Ward	7	Auckland City	02	Auckland Region	2.66821e+06	6.48229e+06	1	437800	8	1061	65	3
3190300	60	612801	Riverton East	7305	Riverton Ward	73	Southland District	15	Southland Region	2.1268e+06	5.41797e+06	1	3190300	8	1035	27	3
438218	3	514101	Auckland Harbourside	704	Hobson Ward	7	Auckland City	02	Auckland Region	2.66769e+06	6.48287e+06	1	438218	6	982	1	2
2142000	96	573400	Mt Victoria West	4703	Lambton Ward	47	Wellington City	09	Wellington Region	2.65957e+06	5.98821e+06	1	2142000	3	930	32	1
2142500	87	573400	Mt Victoria West	4703	Lambton Ward	47	Wellington City	09	Wellington Region	2.65946e+06	5.98822e+06	1	2142500	1	899	29	1
438405	219	514103	Auckland Central East	704	Hobson Ward	7	Auckland City	02	Auckland Region	2.66835e+06	6.48232e+06	1	438405	9	1121	99	3
2141300	207	573400	Mt Victoria West	4703	Lambton Ward	47	Wellington City	09	Wellington Region	2.65941e+06	5.98843e+06	1	2141300	6	989	72	2
438406	318	514103	Auckland Central East	704	Hobson Ward	7	Auckland City	02	Auckland Region	2.66849e+06	6.48222e+06	1	438406	10	1166	143	3
2476600	126	587701	Sockburn	6004	Riccarton-Wigram Ward	60	Christchurch City	13	Canterbury Region	2.47526e+06	5.74146e+06	1	2476600	9	1072	57	3
2146000	138	573300	Mt Cook-Wallace Street	4703	Lambton Ward	47	Wellington City	09	Wellington Region	2.65885e+06	5.98786e+06	1	2146000	6	986	48	2
2145100	156	573300	Mt Cook-Wallace Street	4703	Lambton Ward	47	Wellington City	09	Wellington Region	2.65846e+06	5.98785e+06	1	2145100	5	955	55	2
2144600	156	573300	Mt Cook-Wallace Street	4703	Lambton Ward	47	Wellington City	09	Wellington Region	2.65854e+06	5.9881e+06	1	2144600	10	1284	70	3
2144700	45	573300	Mt Cook-Wallace Street	4703	Lambton Ward	47	Wellington City	09	Wellington Region	2.6583e+06	5.98813e+06	1	2144700	5	974	16	2
2157702	78	573200	Aro Street-Nairn Street	4703	Lambton Ward	47	Wellington City	09	Wellington Region	2.6581e+06	5.98879e+06	1	2157702	8	1059	35	3
1489300	48	548200	Hastings Central	3005	Hastings Ward	30	Hastings District	06	Hawke's Bay Region	2.83933e+06	6.16665e+06	1	1489300	9	1131	22	3
966100	207	527504	Leamington West	1702	Cambridge Ward	17	Waipa District	03	Waikato Region	2.72784e+06	6.36361e+06	1	966100	6	986	72	2
965505	15	527505	Leamington East	1702	Cambridge Ward	17	Waipa District	03	Waikato Region	2.7283e+06	6.36383e+06	1	965505	2	900	5	1
966200	192	527505	Leamington East	1702	Cambridge Ward	17	Waipa District	03	Waikato Region	2.72806e+06	6.36353e+06	1	966200	5	964	67	2
2539205	99	590300	Middleton	6006	Spreydon-Heathcote Ward	60	Christchurch City	13	Canterbury Region	2.47752e+06	5.73971e+06	1	2539205	7	1025	35	2
441300	117	514301	Grafton West	704	Hobson Ward	7	Auckland City	02	Auckland Region	2.66777e+06	6.48072e+06	1	441300	1	897	39	1
2144900	27	573300	Mt Cook-Wallace Street	4703	Lambton Ward	47	Wellington City	09	Wellington Region	2.65832e+06	5.98799e+06	1	2144900	5	974	9	2
1490100	12	548200	Hastings Central	3005	Hastings Ward	30	Hastings District	06	Hawke's Bay Region	2.83946e+06	6.16708e+06	1	1490100	8	1051	5	3
2539206	99	590300	Middleton	6006	Spreydon-Heathcote Ward	60	Christchurch City	13	Canterbury Region	2.47745e+06	5.73966e+06	1	2539206	7	1025	35	2
441800	6	514301	Grafton West	704	Hobson Ward	7	Auckland City	02	Auckland Region	2.66747e+06	6.48032e+06	1	441800	7	1004	2	2
2538700	81	590300	Middleton	6006	Spreydon-Heathcote Ward	60	Christchurch City	13	Canterbury Region	2.47744e+06	5.73952e+06	1	2538700	6	998	28	2
2143300	24	573400	Mt Victoria West	4703	Lambton Ward	47	Wellington City	09	Wellington Region	2.65918e+06	5.98799e+06	1	2143300	2	906	8	1
2143100	84	573400	Mt Victoria West	4703	Lambton Ward	47	Wellington City	09	Wellington Region	2.65944e+06	5.98797e+06	1	2143100	8	1064	38	3
2144300	114	573300	Mt Cook-Wallace Street	4703	Lambton Ward	47	Wellington City	09	Wellington Region	2.65851e+06	5.98829e+06	1	2144300	9	1114	51	3
2144000	102	573400	Mt Victoria West	4703	Lambton Ward	47	Wellington City	09	Wellington Region	2.6595e+06	5.98828e+06	1	2144000	5	964	36	2
1488700	57	548200	Hastings Central	3005	Hastings Ward	30	Hastings District	06	Hawke's Bay Region	2.83928e+06	6.16691e+06	1	1488700	8	1041	26	3
1487600	120	547700	St Leonards	3005	Hastings Ward	30	Hastings District	06	Hawke's Bay Region	2.83888e+06	6.16687e+06	1	1487600	4	950	42	2
1488100	51	547700	St Leonards	3005	Hastings Ward	30	Hastings District	06	Hawke's Bay Region	2.83939e+06	6.16758e+06	1	1488100	7	1006	18	2
2667600	78	592000	Aorangi	6002	Fendalton-Waimairi Ward	60	Christchurch City	13	Canterbury Region	2.47677e+06	5.74543e+06	1	2667600	5	965	27	2
2667300	105	592000	Aorangi	6001	Shirley-Papanui Ward	60	Christchurch City	13	Canterbury Region	2.47714e+06	5.74564e+06	1	2667300	3	933	35	1
2799800	96	599700	Parkside	6404	Timaru Ward	64	Timaru District	13	Canterbury Region	2.37066e+06	5.6433e+06	1	2799800	9	1085	43	3
2799100	90	599700	Parkside	6404	Timaru Ward	64	Timaru District	13	Canterbury Region	2.37025e+06	5.64338e+06	1	2799100	8	1071	40	3
2799600	69	599700	Parkside	6404	Timaru Ward	64	Timaru District	13	Canterbury Region	2.37072e+06	5.64347e+06	1	2799600	8	1071	31	3
2799700	39	599700	Parkside	6404	Timaru Ward	64	Timaru District	13	Canterbury Region	2.37093e+06	5.64347e+06	1	2799700	8	1071	18	3
2144200	108	573300	Mt Cook-Wallace Street	4703	Lambton Ward	47	Wellington City	09	Wellington Region	2.65837e+06	5.98824e+06	1	2144200	8	1061	49	3
2143500	54	573400	Mt Victoria West	4703	Lambton Ward	47	Wellington City	09	Wellington Region	2.65918e+06	5.98822e+06	1	2143500	5	968	19	2
2144500	390	573300	Mt Cook-Wallace Street	4703	Lambton Ward	47	Wellington City	09	Wellington Region	2.6586e+06	5.98827e+06	1	2144500	10	1206	176	3
2143200	72	573400	Mt Victoria West	4703	Lambton Ward	47	Wellington City	09	Wellington Region	2.65955e+06	5.98792e+06	1	2143200	2	906	24	1
1488500	147	548200	Hastings Central	3005	Hastings Ward	30	Hastings District	06	Hawke's Bay Region	2.83897e+06	6.16676e+06	1	1488500	7	1026	51	2
2668501	180	592000	Aorangi	6002	Fendalton-Waimairi Ward	60	Christchurch City	13	Canterbury Region	2.47665e+06	5.74506e+06	1	2668501	6	990	63	2
2143800	69	573400	Mt Victoria West	4703	Lambton Ward	47	Wellington City	09	Wellington Region	2.65933e+06	5.9882e+06	1	2143800	5	964	24	2
2144400	258	573300	Mt Cook-Wallace Street	4703	Lambton Ward	47	Wellington City	09	Wellington Region	2.65844e+06	5.98817e+06	1	2144400	10	1346	116	3
1489100	138	548200	Hastings Central	3005	Hastings Ward	30	Hastings District	06	Hawke's Bay Region	2.83923e+06	6.16659e+06	1	1489100	8	1054	62	3
1487900	33	547700	St Leonards	3005	Hastings Ward	30	Hastings District	06	Hawke's Bay Region	2.83929e+06	6.16731e+06	1	1487900	7	1006	12	2
2667700	114	592000	Aorangi	6002	Fendalton-Waimairi Ward	60	Christchurch City	13	Canterbury Region	2.47678e+06	5.74523e+06	1	2667700	5	960	40	2
2143600	75	573400	Mt Victoria West	4703	Lambton Ward	47	Wellington City	09	Wellington Region	2.65926e+06	5.98813e+06	1	2143600	5	968	26	2
2142800	117	573400	Mt Victoria West	4703	Lambton Ward	47	Wellington City	09	Wellington Region	2.65938e+06	5.98808e+06	1	2142800	8	1041	53	3
2143400	12	573400	Mt Victoria West	4703	Lambton Ward	47	Wellington City	09	Wellington Region	2.65923e+06	5.98835e+06	1	2143400	5	968	4	2
2144100	411	573300	Mt Cook-Wallace Street	4703	Lambton Ward	47	Wellington City	09	Wellington Region	2.65841e+06	5.98838e+06	1	2144100	9	1077	185	3
440500	222	514301	Grafton West	704	Hobson Ward	7	Auckland City	02	Auckland Region	2.66801e+06	6.48144e+06	1	440500	10	1309	100	3
963900	171	527502	Cambridge West	1702	Cambridge Ward	17	Waipa District	03	Waikato Region	2.7269e+06	6.36531e+06	1	963900	5	973	60	2
2668600	78	592000	Aorangi	6002	Fendalton-Waimairi Ward	60	Christchurch City	13	Canterbury Region	2.47656e+06	5.74496e+06	1	2668600	3	918	26	1
2667200	69	592000	Aorangi	6001	Shirley-Papanui Ward	60	Christchurch City	13	Canterbury Region	2.47696e+06	5.74579e+06	1	2667200	5	965	24	2
2143000	90	573400	Mt Victoria West	4703	Lambton Ward	47	Wellington City	09	Wellington Region	2.65934e+06	5.98802e+06	1	2143000	8	1064	40	3
2143900	129	573400	Mt Victoria West	4703	Lambton Ward	47	Wellington City	09	Wellington Region	2.65937e+06	5.98832e+06	1	2143900	7	1006	45	2
1488300	168	547700	St Leonards	3005	Hastings Ward	30	Hastings District	06	Hawke's Bay Region	2.83956e+06	6.16758e+06	1	1488300	7	1001	59	2
964100	198	527502	Cambridge West	1702	Cambridge Ward	17	Waipa District	03	Waikato Region	2.72636e+06	6.36507e+06	1	964100	4	949	69	2
964300	165	527502	Cambridge West	1702	Cambridge Ward	17	Waipa District	03	Waikato Region	2.72684e+06	6.36507e+06	1	964300	8	1070	74	3
964200	108	527502	Cambridge West	1702	Cambridge Ward	17	Waipa District	03	Waikato Region	2.72659e+06	6.36506e+06	1	964200	4	939	38	2
964800	72	527502	Cambridge West	1702	Cambridge Ward	17	Waipa District	03	Waikato Region	2.727e+06	6.36472e+06	1	964800	6	985	25	2
2667100	60	592000	Aorangi	6001	Shirley-Papanui Ward	60	Christchurch City	13	Canterbury Region	2.47712e+06	5.7459e+06	1	2667100	3	933	20	1
2799400	21	599700	Parkside	6404	Timaru Ward	64	Timaru District	13	Canterbury Region	2.37069e+06	5.64358e+06	1	2799400	6	983	7	2
2799000	12	599700	Parkside	6404	Timaru Ward	64	Timaru District	13	Canterbury Region	2.37034e+06	5.64344e+06	1	2799000	6	998	4	2
1488600	111	548200	Hastings Central	3005	Hastings Ward	30	Hastings District	06	Hawke's Bay Region	2.8392e+06	6.16683e+06	1	1488600	9	1086	50	3
1488200	75	547700	St Leonards	3005	Hastings Ward	30	Hastings District	06	Hawke's Bay Region	2.83949e+06	6.16744e+06	1	1488200	6	976	26	2
1488000	144	547700	St Leonards	3005	Hastings Ward	30	Hastings District	06	Hawke's Bay Region	2.83935e+06	6.16743e+06	1	1488000	9	1082	65	3
1487800	24	547700	St Leonards	3005	Hastings Ward	30	Hastings District	06	Hawke's Bay Region	2.8392e+06	6.16743e+06	1	1487800	7	1006	8	2
964500	72	527502	Cambridge West	1702	Cambridge Ward	17	Waipa District	03	Waikato Region	2.72638e+06	6.36485e+06	1	964500	5	955	25	2
964600	117	527502	Cambridge West	1702	Cambridge Ward	17	Waipa District	03	Waikato Region	2.72661e+06	6.36481e+06	1	964600	5	955	41	2
964700	132	527502	Cambridge West	1702	Cambridge Ward	17	Waipa District	03	Waikato Region	2.72685e+06	6.36472e+06	1	964700	7	1013	46	2
2667400	189	592000	Aorangi	6002	Fendalton-Waimairi Ward	60	Christchurch City	13	Canterbury Region	2.47689e+06	5.7456e+06	1	2667400	4	942	66	2
2105001	108	574700	Wilton-Otari	4702	Onslow-Western Ward	47	Wellington City	09	Wellington Region	2.65788e+06	5.993e+06	1	2105001	1	889	36	1
2143700	69	573400	Mt Victoria West	4703	Lambton Ward	47	Wellington City	09	Wellington Region	2.65928e+06	5.98821e+06	1	2143700	5	968	24	2
1489000	3	548200	Hastings Central	3005	Hastings Ward	30	Hastings District	06	Hawke's Bay Region	2.83953e+06	6.1668e+06	1	1489000	8	1041	1	3
963200	201	527502	Cambridge West	1702	Cambridge Ward	17	Waipa District	03	Waikato Region	2.72632e+06	6.36593e+06	1	963200	3	928	66	1
963400	243	527502	Cambridge West	1702	Cambridge Ward	17	Waipa District	03	Waikato Region	2.7268e+06	6.36592e+06	1	963400	4	939	85	2
963300	237	527502	Cambridge West	1702	Cambridge Ward	17	Waipa District	03	Waikato Region	2.72656e+06	6.36592e+06	1	963300	4	952	83	2
2147200	147	573300	Mt Cook-Wallace Street	4703	Lambton Ward	47	Wellington City	09	Wellington Region	2.65867e+06	5.9875e+06	1	2147200	7	1004	51	2
1492200	12	548200	Hastings Central	3005	Hastings Ward	30	Hastings District	06	Hawke's Bay Region	2.83995e+06	6.16662e+06	1	1492200	9	1108	5	3
1491000	6	548200	Hastings Central	3005	Hastings Ward	30	Hastings District	06	Hawke's Bay Region	2.83997e+06	6.16714e+06	1	1491000	8	1041	3	3
2802900	156	599800	Timaru Gardens	6404	Timaru Ward	64	Timaru District	13	Canterbury Region	2.37068e+06	5.64247e+06	1	2802900	8	1039	70	3
2802000	60	599800	Timaru Gardens	6404	Timaru Ward	64	Timaru District	13	Canterbury Region	2.37017e+06	5.64258e+06	1	2802000	8	1046	27	3
2802800	75	599800	Timaru Gardens	6404	Timaru Ward	64	Timaru District	13	Canterbury Region	2.37046e+06	5.64255e+06	1	2802800	10	1172	34	3
2801900	183	599800	Timaru Gardens	6404	Timaru Ward	64	Timaru District	13	Canterbury Region	2.37003e+06	5.64252e+06	1	2801900	7	1009	64	2
2146500	138	573300	Mt Cook-Wallace Street	4703	Lambton Ward	47	Wellington City	09	Wellington Region	2.65854e+06	5.98779e+06	1	2146500	10	1220	62	3
968302	78	531003	Te Awamutu East	1704	Te Awamutu Ward	17	Waipa District	03	Waikato Region	2.71451e+06	6.35251e+06	1	968302	6	981	27	2
574800	189	518801	Walmsley	702	Avondale-Roskill Ward	7	Auckland City	02	Auckland Region	2.66454e+06	6.47697e+06	1	574800	8	1056	85	3
967201	102	527505	Leamington East	1702	Cambridge Ward	17	Waipa District	03	Waikato Region	2.72808e+06	6.36301e+06	1	967201	8	1067	46	3
442400	276	514302	Grafton East	704	Hobson Ward	7	Auckland City	02	Auckland Region	2.66806e+06	6.48093e+06	1	442400	10	1183	124	3
2803000	78	599800	Timaru Gardens	6404	Timaru Ward	64	Timaru District	13	Canterbury Region	2.37039e+06	5.64228e+06	1	2803000	8	1042	35	3
2803100	93	599800	Timaru Gardens	6404	Timaru Ward	64	Timaru District	13	Canterbury Region	2.37062e+06	5.64231e+06	1	2803100	5	970	33	2
2803200	90	599800	Timaru Gardens	6404	Timaru Ward	64	Timaru District	13	Canterbury Region	2.37095e+06	5.64238e+06	1	2803200	8	1042	40	3
2803300	3	599800	Timaru Gardens	6404	Timaru Ward	64	Timaru District	13	Canterbury Region	2.37127e+06	5.64228e+06	1	2803300	7	1012	1	2
50400	81	501200	Haruru Falls	102	Eastern Ward	1	Far North District	01	Northland Region	2.60688e+06	6.6571e+06	1	50400	7	1022	28	2
50803	63	501200	Haruru Falls	102	Eastern Ward	1	Far North District	01	Northland Region	2.60656e+06	6.65711e+06	1	50803	8	1036	28	3
2539700	120	590200	Wharenui	6004	Riccarton-Wigram Ward	60	Christchurch City	13	Canterbury Region	2.47589e+06	5.74088e+06	1	2539700	8	1050	54	3
2540200	87	590200	Wharenui	6004	Riccarton-Wigram Ward	60	Christchurch City	13	Canterbury Region	2.47569e+06	5.74106e+06	1	2540200	7	1015	30	2
50806	3	501200	Haruru Falls	102	Eastern Ward	1	Far North District	01	Northland Region	2.60604e+06	6.65707e+06	1	50806	8	1036	1	3
2146200	99	573300	Mt Cook-Wallace Street	4703	Lambton Ward	47	Wellington City	09	Wellington Region	2.65881e+06	5.98766e+06	1	2146200	7	1008	35	2
2145000	228	573300	Mt Cook-Wallace Street	4703	Lambton Ward	47	Wellington City	09	Wellington Region	2.65842e+06	5.98796e+06	1	2145000	7	1007	80	2
2145300	153	573300	Mt Cook-Wallace Street	4703	Lambton Ward	47	Wellington City	09	Wellington Region	2.65861e+06	5.98811e+06	1	2145300	7	1012	54	2
441501	84	514301	Grafton West	704	Hobson Ward	7	Auckland City	02	Auckland Region	2.66748e+06	6.48065e+06	1	441501	8	1066	38	3
2801000	84	599700	Parkside	6404	Timaru Ward	64	Timaru District	13	Canterbury Region	2.37102e+06	5.64328e+06	1	2801000	10	1149	38	3
2801100	27	599700	Parkside	6404	Timaru Ward	64	Timaru District	13	Canterbury Region	2.37116e+06	5.64323e+06	1	2801100	10	1149	12	3
2145400	21	573300	Mt Cook-Wallace Street	4703	Lambton Ward	47	Wellington City	09	Wellington Region	2.6588e+06	5.98806e+06	1	2145400	7	1012	7	2
440900	363	514301	Grafton West	704	Hobson Ward	7	Auckland City	02	Auckland Region	2.66784e+06	6.48115e+06	1	440900	10	1183	163	3
1489900	6	548200	Hastings Central	3005	Hastings Ward	30	Hastings District	06	Hawke's Bay Region	2.8396e+06	6.16652e+06	1	1489900	8	1052	3	3
1490400	198	548200	Hastings Central	3005	Hastings Ward	30	Hastings District	06	Hawke's Bay Region	2.83977e+06	6.1673e+06	1	1490400	10	1145	89	3
965501	186	527505	Leamington East	1702	Cambridge Ward	17	Waipa District	03	Waikato Region	2.72845e+06	6.36424e+06	1	965501	2	916	61	1
965000	30	527503	Cambridge Central	1702	Cambridge Ward	17	Waipa District	03	Waikato Region	2.72709e+06	6.36453e+06	1	965000	5	969	10	2
965800	51	527504	Leamington West	1702	Cambridge Ward	17	Waipa District	03	Waikato Region	2.72801e+06	6.36395e+06	1	965800	4	942	18	2
965100	15	527503	Cambridge Central	1702	Cambridge Ward	17	Waipa District	03	Waikato Region	2.72741e+06	6.36447e+06	1	965100	5	969	5	2
965200	27	527503	Cambridge Central	1702	Cambridge Ward	17	Waipa District	03	Waikato Region	2.72758e+06	6.36451e+06	1	965200	5	969	9	2
965400	159	527503	Cambridge Central	1702	Cambridge Ward	17	Waipa District	03	Waikato Region	2.72781e+06	6.36437e+06	1	965400	5	969	56	2
2539102	123	590300	Middleton	6006	Spreydon-Heathcote Ward	60	Christchurch City	13	Canterbury Region	2.47764e+06	5.73976e+06	1	2539102	9	1121	55	3
2800800	129	599700	Parkside	6404	Timaru Ward	64	Timaru District	13	Canterbury Region	2.37039e+06	5.64305e+06	1	2800800	9	1111	58	3
2800700	30	599700	Parkside	6404	Timaru Ward	64	Timaru District	13	Canterbury Region	2.37026e+06	5.64299e+06	1	2800700	8	1039	14	3
2801300	87	599700	Parkside	6404	Timaru Ward	64	Timaru District	13	Canterbury Region	2.37085e+06	5.643e+06	1	2801300	10	1192	39	3
2801200	153	599700	Parkside	6404	Timaru Ward	64	Timaru District	13	Canterbury Region	2.37062e+06	5.64303e+06	1	2801200	8	1063	69	3
2539203	6	590300	Middleton	6006	Spreydon-Heathcote Ward	60	Christchurch City	13	Canterbury Region	2.47715e+06	5.74014e+06	1	2539203	10	1152	3	3
2145600	318	573300	Mt Cook-Wallace Street	4703	Lambton Ward	47	Wellington City	09	Wellington Region	2.65896e+06	5.98812e+06	1	2145600	10	1249	143	3
2145500	93	573300	Mt Cook-Wallace Street	4703	Lambton Ward	47	Wellington City	09	Wellington Region	2.65894e+06	5.98822e+06	1	2145500	7	1012	33	2
1489700	114	548200	Hastings Central	3005	Hastings Ward	30	Hastings District	06	Hawke's Bay Region	2.83936e+06	6.16628e+06	1	1489700	8	1052	51	3
1489400	42	548200	Hastings Central	3005	Hastings Ward	30	Hastings District	06	Hawke's Bay Region	2.83943e+06	6.16672e+06	1	1489400	9	1131	19	3
1490300	126	548200	Hastings Central	3005	Hastings Ward	30	Hastings District	06	Hawke's Bay Region	2.83966e+06	6.16722e+06	1	1490300	7	1019	44	2
966000	219	527504	Leamington West	1702	Cambridge Ward	17	Waipa District	03	Waikato Region	2.72766e+06	6.36377e+06	1	966000	5	954	77	2
965502	207	527505	Leamington East	1702	Cambridge Ward	17	Waipa District	03	Waikato Region	2.7282e+06	6.36393e+06	1	965502	2	912	68	1
965300	6	527503	Cambridge Central	1702	Cambridge Ward	17	Waipa District	03	Waikato Region	2.72763e+06	6.36424e+06	1	965300	5	969	2	2
441900	18	514301	Grafton West	704	Hobson Ward	7	Auckland City	02	Auckland Region	2.66755e+06	6.48023e+06	1	441900	7	1004	6	2
2146100	126	573300	Mt Cook-Wallace Street	4703	Lambton Ward	47	Wellington City	09	Wellington Region	2.65891e+06	5.9878e+06	1	2146100	7	1008	44	2
2145900	24	573300	Mt Cook-Wallace Street	4703	Lambton Ward	47	Wellington City	09	Wellington Region	2.65877e+06	5.98789e+06	1	2145900	7	1004	8	2
2145200	99	573300	Mt Cook-Wallace Street	4703	Lambton Ward	47	Wellington City	09	Wellington Region	2.6583e+06	5.98775e+06	1	2145200	6	975	35	2
2144800	270	573300	Mt Cook-Wallace Street	4703	Lambton Ward	47	Wellington City	09	Wellington Region	2.65838e+06	5.98808e+06	1	2144800	10	1246	122	3
441000	3	514301	Grafton West	704	Hobson Ward	7	Auckland City	02	Auckland Region	2.66796e+06	6.48091e+06	1	441000	10	1183	1	3
441100	351	514301	Grafton West	704	Hobson Ward	7	Auckland City	02	Auckland Region	2.66784e+06	6.48124e+06	1	441100	10	1159	158	3
441505	162	514301	Grafton West	704	Hobson Ward	7	Auckland City	02	Auckland Region	2.66744e+06	6.48051e+06	1	441505	8	1039	73	3
441600	3	514301	Grafton West	704	Hobson Ward	7	Auckland City	02	Auckland Region	2.66768e+06	6.48042e+06	1	441600	7	1004	1	2
2538602	66	590300	Middleton	6006	Spreydon-Heathcote Ward	60	Christchurch City	13	Canterbury Region	2.47715e+06	5.7395e+06	1	2538602	10	1318	30	3
2539002	171	590300	Middleton	6006	Spreydon-Heathcote Ward	60	Christchurch City	13	Canterbury Region	2.47776e+06	5.73986e+06	1	2539002	6	998	60	2
441200	126	514301	Grafton West	704	Hobson Ward	7	Auckland City	02	Auckland Region	2.66782e+06	6.4808e+06	1	441200	6	999	44	2
2145700	48	573300	Mt Cook-Wallace Street	4703	Lambton Ward	47	Wellington City	09	Wellington Region	2.65891e+06	5.98797e+06	1	2145700	7	1004	17	2
441503	162	514301	Grafton West	704	Hobson Ward	7	Auckland City	02	Auckland Region	2.66759e+06	6.48055e+06	1	441503	6	979	57	2
1490900	33	548200	Hastings Central	3005	Hastings Ward	30	Hastings District	06	Hawke's Bay Region	2.83981e+06	6.16701e+06	1	1490900	8	1041	15	3
1489801	42	548200	Hastings Central	3005	Hastings Ward	30	Hastings District	06	Hawke's Bay Region	2.83942e+06	6.16654e+06	1	1489801	8	1052	19	3
441506	210	514301	Grafton West	704	Hobson Ward	7	Auckland City	02	Auckland Region	2.66758e+06	6.48046e+06	1	441506	7	1010	74	2
2539101	21	590300	Middleton	6006	Spreydon-Heathcote Ward	60	Christchurch City	13	Canterbury Region	2.4773e+06	5.74015e+06	1	2539101	4	952	7	2
441400	9	514301	Grafton West	704	Hobson Ward	7	Auckland City	02	Auckland Region	2.66752e+06	6.48073e+06	1	441400	6	999	3	2
1490700	18	548200	Hastings Central	3005	Hastings Ward	30	Hastings District	06	Hawke's Bay Region	2.83961e+06	6.16686e+06	1	1490700	8	1041	8	3
1490500	135	548200	Hastings Central	3005	Hastings Ward	30	Hastings District	06	Hawke's Bay Region	2.83989e+06	6.16741e+06	1	1490500	5	968	47	2
2539103	108	590300	Middleton	6006	Spreydon-Heathcote Ward	60	Christchurch City	13	Canterbury Region	2.47752e+06	5.73978e+06	1	2539103	4	952	38	2
2539204	102	590300	Middleton	6006	Spreydon-Heathcote Ward	60	Christchurch City	13	Canterbury Region	2.47729e+06	5.7399e+06	1	2539204	10	1152	46	3
2800300	9	599700	Parkside	6404	Timaru Ward	64	Timaru District	13	Canterbury Region	2.3702e+06	5.64326e+06	1	2800300	6	976	3	2
2800400	66	599700	Parkside	6404	Timaru Ward	64	Timaru District	13	Canterbury Region	2.37038e+06	5.64323e+06	1	2800400	8	1039	30	3
2800900	75	599700	Parkside	6404	Timaru Ward	64	Timaru District	13	Canterbury Region	2.37085e+06	5.64328e+06	1	2800900	6	983	26	2
2801400	93	599700	Parkside	6404	Timaru Ward	64	Timaru District	13	Canterbury Region	2.37103e+06	5.64306e+06	1	2801400	7	1007	33	2
441502	138	514301	Grafton West	704	Hobson Ward	7	Auckland City	02	Auckland Region	2.66746e+06	6.48057e+06	1	441502	8	1066	62	3
441700	3	514302	Grafton East	704	Hobson Ward	7	Auckland City	02	Auckland Region	2.66776e+06	6.48043e+06	1	441700	7	1004	1	2
2145800	48	573300	Mt Cook-Wallace Street	4703	Lambton Ward	47	Wellington City	09	Wellington Region	2.65878e+06	5.98793e+06	1	2145800	5	974	17	2
1489802	21	548200	Hastings Central	3005	Hastings Ward	30	Hastings District	06	Hawke's Bay Region	2.83949e+06	6.16642e+06	1	1489802	8	1052	9	3
2148601	57	576500	Adelaide	4703	Lambton Ward	47	Wellington City	09	Wellington Region	2.65894e+06	5.98749e+06	1	2148601	7	1009	20	2
2148400	225	576500	Adelaide	4703	Lambton Ward	47	Wellington City	09	Wellington Region	2.65884e+06	5.98751e+06	1	2148400	9	1114	101	3
1494400	3	548200	Hastings Central	3005	Hastings Ward	30	Hastings District	06	Hawke's Bay Region	2.84023e+06	6.16665e+06	1	1494400	8	1046	1	3
969400	69	531002	Te Awamutu Central	1704	Te Awamutu Ward	17	Waipa District	03	Waikato Region	2.71328e+06	6.35269e+06	1	969400	6	998	24	2
970000	153	531002	Te Awamutu Central	1704	Te Awamutu Ward	17	Waipa District	03	Waikato Region	2.71389e+06	6.35265e+06	1	970000	7	1014	54	2
1493800	18	548200	Hastings Central	3005	Hastings Ward	30	Hastings District	06	Hawke's Bay Region	2.84007e+06	6.16608e+06	1	1493800	9	1108	8	3
1494000	93	548200	Hastings Central	3005	Hastings Ward	30	Hastings District	06	Hawke's Bay Region	2.84018e+06	6.16612e+06	1	1494000	10	1356	42	3
1494300	78	548200	Hastings Central	3005	Hastings Ward	30	Hastings District	06	Hawke's Bay Region	2.8406e+06	6.16707e+06	1	1494300	9	1108	35	3
2803500	114	599800	Timaru Gardens	6404	Timaru Ward	64	Timaru District	13	Canterbury Region	2.37058e+06	5.64217e+06	1	2803500	7	1012	40	2
2803600	132	599800	Timaru Gardens	6404	Timaru Ward	64	Timaru District	13	Canterbury Region	2.37096e+06	5.64225e+06	1	2803600	8	1059	59	3
2803700	81	599900	Redruth	6404	Timaru Ward	64	Timaru District	13	Canterbury Region	2.37034e+06	5.64192e+06	1	2803700	8	1059	36	3
2542500	180	590100	Upper Riccarton	6004	Riccarton-Wigram Ward	60	Christchurch City	13	Canterbury Region	2.47532e+06	5.74178e+06	1	2542500	8	1032	81	3
2146700	66	573300	Mt Cook-Wallace Street	4703	Lambton Ward	47	Wellington City	09	Wellington Region	2.65858e+06	5.98768e+06	1	2146700	10	1206	30	3
51402	27	501100	Paihia	102	Eastern Ward	1	Far North District	01	Northland Region	2.61085e+06	6.655e+06	1	51402	2	912	9	1
51406	171	501100	Paihia	102	Eastern Ward	1	Far North District	01	Northland Region	2.61054e+06	6.65486e+06	1	51406	5	958	60	2
51408	93	501100	Paihia	102	Eastern Ward	1	Far North District	01	Northland Region	2.6106e+06	6.65454e+06	1	51408	6	980	33	2
51401	114	501612	Opua West	102	Eastern Ward	1	Far North District	01	Northland Region	2.61135e+06	6.65416e+06	1	51401	2	912	38	1
969600	129	531002	Te Awamutu Central	1704	Te Awamutu Ward	17	Waipa District	03	Waikato Region	2.71345e+06	6.35246e+06	1	969600	6	984	45	2
51409	78	501100	Paihia	102	Eastern Ward	1	Far North District	01	Northland Region	2.61049e+06	6.65432e+06	1	51409	6	980	27	2
967801	114	527505	Leamington East	1702	Cambridge Ward	17	Waipa District	03	Waikato Region	2.72752e+06	6.36232e+06	1	967801	7	1022	40	2
967602	294	527504	Leamington West	1702	Cambridge Ward	17	Waipa District	03	Waikato Region	2.72737e+06	6.3624e+06	1	967602	5	965	103	2
443700	132	515700	Epsom North	704	Hobson Ward	7	Auckland City	02	Auckland Region	2.66837e+06	6.47935e+06	1	443700	3	919	44	1
575100	135	518801	Walmsley	702	Avondale-Roskill Ward	7	Auckland City	02	Auckland Region	2.66467e+06	6.47679e+06	1	575100	10	1205	61	3
2540300	141	590200	Wharenui	6004	Riccarton-Wigram Ward	60	Christchurch City	13	Canterbury Region	2.47599e+06	5.74108e+06	1	2540300	4	946	49	2
2147600	81	573300	Mt Cook-Wallace Street	4703	Lambton Ward	47	Wellington City	09	Wellington Region	2.65849e+06	5.98753e+06	1	2147600	7	1020	28	2
2147500	114	573300	Mt Cook-Wallace Street	4703	Lambton Ward	47	Wellington City	09	Wellington Region	2.65858e+06	5.98753e+06	1	2147500	6	980	40	2
442800	183	514302	Grafton East	704	Hobson Ward	7	Auckland City	02	Auckland Region	2.66789e+06	6.48071e+06	1	442800	7	1005	64	2
2148000	87	576500	Adelaide	4703	Lambton Ward	47	Wellington City	09	Wellington Region	2.65906e+06	5.98794e+06	1	2148000	6	985	30	2
2147900	9	576500	Adelaide	4703	Lambton Ward	47	Wellington City	09	Wellington Region	2.65898e+06	5.98797e+06	1	2147900	6	985	3	2
1492000	3	548200	Hastings Central	3005	Hastings Ward	30	Hastings District	06	Hawke's Bay Region	2.83978e+06	6.16647e+06	1	1492000	9	1108	1	3
1492600	18	548200	Hastings Central	3005	Hastings Ward	30	Hastings District	06	Hawke's Bay Region	2.83986e+06	6.16636e+06	1	1492600	9	1108	8	3
2802300	6	599800	Timaru Gardens	6404	Timaru Ward	64	Timaru District	13	Canterbury Region	2.37113e+06	5.64292e+06	1	2802300	8	1054	3	3
2801800	120	599800	Timaru Gardens	6404	Timaru Ward	64	Timaru District	13	Canterbury Region	2.37037e+06	5.64282e+06	1	2801800	9	1128	54	3
2802600	66	599800	Timaru Gardens	6404	Timaru Ward	64	Timaru District	13	Canterbury Region	2.37042e+06	5.64268e+06	1	2802600	7	1019	23	2
574900	108	518801	Walmsley	702	Avondale-Roskill Ward	7	Auckland City	02	Auckland Region	2.66478e+06	6.47686e+06	1	574900	9	1077	49	3
442600	183	514302	Grafton East	704	Hobson Ward	7	Auckland City	02	Auckland Region	2.66798e+06	6.48068e+06	1	442600	7	1004	64	2
1492400	9	548200	Hastings Central	3005	Hastings Ward	30	Hastings District	06	Hawke's Bay Region	2.83965e+06	6.16624e+06	1	1492400	9	1108	4	3
967000	306	527505	Leamington East	1702	Cambridge Ward	17	Waipa District	03	Waikato Region	2.72788e+06	6.3631e+06	1	967000	6	976	107	2
966900	210	527504	Leamington West	1702	Cambridge Ward	17	Waipa District	03	Waikato Region	2.72764e+06	6.36313e+06	1	966900	8	1062	94	3
967300	39	527504	Leamington West	1702	Cambridge Ward	17	Waipa District	03	Waikato Region	2.7276e+06	6.36345e+06	1	967300	8	1067	18	3
442900	108	514302	Grafton East	704	Hobson Ward	7	Auckland City	02	Auckland Region	2.66799e+06	6.48065e+06	1	442900	8	1069	49	3
443500	171	515700	Epsom North	704	Hobson Ward	7	Auckland City	02	Auckland Region	2.66861e+06	6.47917e+06	1	443500	8	1042	77	3
2539500	93	590200	Wharenui	6004	Riccarton-Wigram Ward	60	Christchurch City	13	Canterbury Region	2.47589e+06	5.74096e+06	1	2539500	8	1050	42	3
2147400	63	573300	Mt Cook-Wallace Street	4703	Lambton Ward	47	Wellington City	09	Wellington Region	2.65857e+06	5.98739e+06	1	2147400	6	984	22	2
2147300	81	573300	Mt Cook-Wallace Street	4703	Lambton Ward	47	Wellington City	09	Wellington Region	2.65867e+06	5.98739e+06	1	2147300	6	984	28	2
2146400	123	573300	Mt Cook-Wallace Street	4703	Lambton Ward	47	Wellington City	09	Wellington Region	2.65839e+06	5.98773e+06	1	2146400	5	962	43	2
1492100	18	548200	Hastings Central	3005	Hastings Ward	30	Hastings District	06	Hawke's Bay Region	2.83988e+06	6.16653e+06	1	1492100	9	1108	8	3
967700	240	527505	Leamington East	1702	Cambridge Ward	17	Waipa District	03	Waikato Region	2.72771e+06	6.36265e+06	1	967700	8	1039	108	3
967601	213	527504	Leamington West	1702	Cambridge Ward	17	Waipa District	03	Waikato Region	2.72749e+06	6.36276e+06	1	967601	5	963	75	2
967402	237	527504	Leamington West	1702	Cambridge Ward	17	Waipa District	03	Waikato Region	2.72728e+06	6.36284e+06	1	967402	8	1035	107	3
2147100	144	573300	Mt Cook-Wallace Street	4703	Lambton Ward	47	Wellington City	09	Wellington Region	2.65867e+06	5.98764e+06	1	2147100	6	989	50	2
2147000	39	573300	Mt Cook-Wallace Street	4703	Lambton Ward	47	Wellington City	09	Wellington Region	2.65872e+06	5.98765e+06	1	2147000	6	989	14	2
2146600	60	573300	Mt Cook-Wallace Street	4703	Lambton Ward	47	Wellington City	09	Wellington Region	2.65851e+06	5.98769e+06	1	2146600	7	1004	21	2
574700	111	518801	Walmsley	703	Eden-Albert Ward	7	Auckland City	02	Auckland Region	2.66437e+06	6.47712e+06	1	574700	8	1042	50	3
1491400	21	548200	Hastings Central	3005	Hastings Ward	30	Hastings District	06	Hawke's Bay Region	2.8399e+06	6.1669e+06	1	1491400	6	986	7	2
443900	3	515700	Epsom North	704	Hobson Ward	7	Auckland City	02	Auckland Region	2.6682e+06	6.47934e+06	1	443900	4	935	1	2
967802	81	527505	Leamington East	1702	Cambridge Ward	17	Waipa District	03	Waikato Region	2.72762e+06	6.36229e+06	1	967802	7	1022	28	2
50503	6	501615	Waitangi	102	Eastern Ward	1	Far North District	01	Northland Region	2.60835e+06	6.66041e+06	1	50503	5	959	2	2
443400	150	515700	Epsom North	704	Hobson Ward	7	Auckland City	02	Auckland Region	2.66865e+06	6.4793e+06	1	443400	6	981	52	2
2146300	348	573300	Mt Cook-Wallace Street	4703	Lambton Ward	47	Wellington City	09	Wellington Region	2.65875e+06	5.98748e+06	1	2146300	7	1008	122	2
442700	9	514302	Grafton East	704	Hobson Ward	7	Auckland City	02	Auckland Region	2.6679e+06	6.48059e+06	1	442700	7	1010	3	2
50301	270	501200	Haruru Falls	102	Eastern Ward	1	Far North District	01	Northland Region	2.6073e+06	6.65733e+06	1	50301	7	1022	94	2
50701	21	501200	Haruru Falls	102	Eastern Ward	1	Far North District	01	Northland Region	2.60632e+06	6.65734e+06	1	50701	6	984	7	2
50306	60	501200	Haruru Falls	102	Eastern Ward	1	Far North District	01	Northland Region	2.60705e+06	6.65738e+06	1	50306	7	1016	21	2
50305	60	501200	Haruru Falls	102	Eastern Ward	1	Far North District	01	Northland Region	2.60693e+06	6.6573e+06	1	50305	5	958	21	2
2802400	93	599800	Timaru Gardens	6404	Timaru Ward	64	Timaru District	13	Canterbury Region	2.37135e+06	5.64273e+06	1	2802400	8	1054	42	3
447400	102	515801	Epsom Central	704	Hobson Ward	7	Auckland City	02	Auckland Region	2.66833e+06	6.47716e+06	1	447400	6	993	36	2
971500	156	531002	Te Awamutu Central	1704	Te Awamutu Ward	17	Waipa District	03	Waikato Region	2.71355e+06	6.35222e+06	1	971500	6	988	55	2
1495100	66	548200	Hastings Central	3005	Hastings Ward	30	Hastings District	06	Hawke's Bay Region	2.84073e+06	6.16659e+06	1	1495100	9	1080	30	3
1496200	114	548000	Mayfair	3005	Hastings Ward	30	Hastings District	06	Hawke's Bay Region	2.84118e+06	6.16792e+06	1	1496200	3	919	38	1
1495000	81	548200	Hastings Central	3005	Hastings Ward	30	Hastings District	06	Hawke's Bay Region	2.84062e+06	6.16652e+06	1	1495000	9	1080	36	3
577300	141	518802	Wesley	702	Avondale-Roskill Ward	7	Auckland City	02	Auckland Region	2.66488e+06	6.47666e+06	1	577300	9	1086	63	3
446000	90	515801	Epsom Central	704	Hobson Ward	7	Auckland City	02	Auckland Region	2.66848e+06	6.47829e+06	1	446000	3	932	30	1
446300	258	515801	Epsom Central	704	Hobson Ward	7	Auckland City	02	Auckland Region	2.66842e+06	6.47793e+06	1	446300	3	918	85	1
54100	24	501100	Paihia	102	Eastern Ward	1	Far North District	01	Northland Region	2.60922e+06	6.65729e+06	1	54100	4	946	8	2
54200	195	501100	Paihia	102	Eastern Ward	1	Far North District	01	Northland Region	2.60982e+06	6.657e+06	1	54200	6	985	68	2
54300	27	501100	Paihia	102	Eastern Ward	1	Far North District	01	Northland Region	2.61003e+06	6.65703e+06	1	54300	10	1335	12	3
54502	51	501100	Paihia	102	Eastern Ward	1	Far North District	01	Northland Region	2.61028e+06	6.65657e+06	1	54502	6	975	18	2
970300	75	531002	Te Awamutu Central	1704	Te Awamutu Ward	17	Waipa District	03	Waikato Region	2.71425e+06	6.35249e+06	1	970300	9	1089	34	3
51403	72	501612	Opua West	102	Eastern Ward	1	Far North District	01	Northland Region	2.61168e+06	6.65348e+06	1	51403	6	980	25	2
1493600	156	548200	Hastings Central	3005	Hastings Ward	30	Hastings District	06	Hawke's Bay Region	2.83985e+06	6.16596e+06	1	1493600	10	1141	70	3
620400	132	519500	Penrose	706	Tamaki-Maungakiekie Ward	7	Auckland City	02	Auckland Region	2.6712e+06	6.47623e+06	1	620400	6	991	46	2
575200	150	518801	Walmsley	702	Avondale-Roskill Ward	7	Auckland City	02	Auckland Region	2.66456e+06	6.47678e+06	1	575200	10	1162	68	3
2148300	15	576500	Adelaide	4703	Lambton Ward	47	Wellington City	09	Wellington Region	2.65896e+06	5.98759e+06	1	2148300	6	985	5	2
1492800	3	548200	Hastings Central	3005	Hastings Ward	30	Hastings District	06	Hawke's Bay Region	2.84003e+06	6.16652e+06	1	1492800	9	1108	1	3
969300	78	531002	Te Awamutu Central	1704	Te Awamutu Ward	17	Waipa District	03	Waikato Region	2.71335e+06	6.35284e+06	1	969300	6	998	27	2
969201	39	531001	Te Awamutu West	1704	Te Awamutu Ward	17	Waipa District	03	Waikato Region	2.71278e+06	6.35295e+06	1	969201	7	1028	14	2
2148900	132	576500	Adelaide	4705	Southern Ward	47	Wellington City	09	Wellington Region	2.6594e+06	5.98705e+06	1	2148900	6	985	46	2
444200	72	515700	Epsom North	704	Hobson Ward	7	Auckland City	02	Auckland Region	2.66834e+06	6.47912e+06	1	444200	4	935	25	2
969202	45	531001	Te Awamutu West	1704	Te Awamutu Ward	17	Waipa District	03	Waikato Region	2.71275e+06	6.35275e+06	1	969202	7	1028	16	2
969900	90	531002	Te Awamutu Central	1704	Te Awamutu Ward	17	Waipa District	03	Waikato Region	2.71397e+06	6.35281e+06	1	969900	5	965	31	2
970100	69	531002	Te Awamutu Central	1704	Te Awamutu Ward	17	Waipa District	03	Waikato Region	2.71421e+06	6.3527e+06	1	970100	9	1089	31	3
1493900	3	548200	Hastings Central	3005	Hastings Ward	30	Hastings District	06	Hawke's Bay Region	2.84012e+06	6.1662e+06	1	1493900	7	1002	1	2
969800	243	531003	Te Awamutu East	1704	Te Awamutu Ward	17	Waipa District	03	Waikato Region	2.71416e+06	6.35308e+06	1	969800	3	925	80	1
2148602	21	576500	Adelaide	4705	Southern Ward	47	Wellington City	09	Wellington Region	2.65892e+06	5.9874e+06	1	2148602	7	1009	7	2
2148500	12	576500	Adelaide	4703	Lambton Ward	47	Wellington City	09	Wellington Region	2.65882e+06	5.98739e+06	1	2148500	3	930	4	1
2149300	12	576500	Adelaide	4703	Lambton Ward	47	Wellington City	09	Wellington Region	2.65955e+06	5.98731e+06	1	2149300	7	1009	4	2
1493700	120	548200	Hastings Central	3005	Hastings Ward	30	Hastings District	06	Hawke's Bay Region	2.83992e+06	6.16605e+06	1	1493700	9	1116	54	3
1494100	15	548200	Hastings Central	3005	Hastings Ward	30	Hastings District	06	Hawke's Bay Region	2.84033e+06	6.16686e+06	1	1494100	9	1108	7	3
2148700	42	576500	Adelaide	4705	Southern Ward	47	Wellington City	09	Wellington Region	2.65889e+06	5.98731e+06	1	2148700	7	1009	15	2
2149200	195	576500	Adelaide	4705	Southern Ward	47	Wellington City	09	Wellington Region	2.65916e+06	5.98698e+06	1	2149200	7	1010	68	2
969500	45	531002	Te Awamutu Central	1704	Te Awamutu Ward	17	Waipa District	03	Waikato Region	2.7136e+06	6.35277e+06	1	969500	6	984	16	2
969100	57	531001	Te Awamutu West	1704	Te Awamutu Ward	17	Waipa District	03	Waikato Region	2.71259e+06	6.35304e+06	1	969100	7	1028	20	2
2149000	60	576500	Adelaide	4705	Southern Ward	47	Wellington City	09	Wellington Region	2.65952e+06	5.98707e+06	1	2149000	7	1010	21	2
2149100	21	576500	Adelaide	4705	Southern Ward	47	Wellington City	09	Wellington Region	2.65913e+06	5.98736e+06	1	2149100	7	1009	7	2
1493400	93	548200	Hastings Central	3005	Hastings Ward	30	Hastings District	06	Hawke's Bay Region	2.84021e+06	6.16628e+06	1	1493400	9	1075	42	3
1493502	57	548200	Hastings Central	3005	Hastings Ward	30	Hastings District	06	Hawke's Bay Region	2.84033e+06	6.16632e+06	1	1493502	7	1002	20	2
1366200	141	544300	Te Hapara	2807	Gisborne Ward	28	Gisborne District	05	Gisborne Region	2.94539e+06	6.27179e+06	1	1366200	6	998	49	2
186402	36	508210	Kaipatiki	503	Harbour Ward	5	North Shore City	02	Auckland Region	2.66407e+06	6.48998e+06	1	186402	7	1015	13	2
711150	372	523105	Golfland	807	Botany-Clevedon Ward	8	Manukau City	02	Auckland Region	2.68049e+06	6.47307e+06	1	711150	5	963	130	2
1497100	240	548000	Mayfair	3005	Hastings Ward	30	Hastings District	06	Hawke's Bay Region	2.84123e+06	6.1671e+06	1	1497100	6	997	84	2
710510	252	523101	Botany Downs	806	Howick Ward	8	Manukau City	02	Auckland Region	2.68126e+06	6.47485e+06	1	710510	2	900	83	1
449000	186	515802	Epsom South	704	Hobson Ward	7	Auckland City	02	Auckland Region	2.66839e+06	6.47693e+06	1	449000	5	956	65	2
711167	63	523106	Millhouse	807	Botany-Clevedon Ward	8	Manukau City	02	Auckland Region	2.68121e+06	6.47417e+06	1	711167	1	890	21	1
448800	228	515802	Epsom South	704	Hobson Ward	7	Auckland City	02	Auckland Region	2.66832e+06	6.47709e+06	1	448800	5	969	80	2
711141	87	523106	Millhouse	806	Howick Ward	8	Manukau City	02	Auckland Region	2.68108e+06	6.47452e+06	1	711141	4	939	30	2
711139	6	523105	Golfland	806	Howick Ward	8	Manukau City	02	Auckland Region	2.68086e+06	6.47423e+06	1	711139	2	903	2	1
710515	141	523101	Botany Downs	806	Howick Ward	8	Manukau City	02	Auckland Region	2.68054e+06	6.47462e+06	1	710515	1	895	47	1
1472804	216	548100	Parkvale	3005	Hastings Ward	30	Hastings District	06	Hawke's Bay Region	2.84133e+06	6.16542e+06	1	1472804	4	940	76	2
1497500	96	548000	Mayfair	3005	Hastings Ward	30	Hastings District	06	Hawke's Bay Region	2.84102e+06	6.1671e+06	1	1497500	6	996	34	2
710601	267	523101	Botany Downs	806	Howick Ward	8	Manukau City	02	Auckland Region	2.68153e+06	6.47541e+06	1	710601	1	895	88	1
1496600	60	548000	Mayfair	3005	Hastings Ward	30	Hastings District	06	Hawke's Bay Region	2.84126e+06	6.16776e+06	1	1496600	5	964	21	2
[truncated: 2,481 more rows]
